# Supplementary material
Source: PubMed Central journal article supplement (PMC5359771)
Supplement: NIHMS849092-supplement-Table_1.pdf [file NIHMS849092-supplement-Table_1.pdf]

Extended Data Table 5. Candidate DNMT3A interacting proteins identified by mass-spectroscopy following DNMT3A peptide pull-down.

| Biological sample name | Protein name                                                                                      | Protein accession numbers | Database sources             | Protein molecular weight (Da) | Protein identification probability | Exclusive unique peptide count | Exclusive unique spectrum count | Total spectrum count | Percentage of total spectra | Percentage sequence coverage |
|------------------------|---------------------------------------------------------------------------------------------------|---------------------------|------------------------------|-------------------------------|------------------------------------|--------------------------------|---------------------------------|----------------------|-----------------------------|------------------------------|
| MOLM13_3A              | Plectin OS=Homo sapiens GN=PLEC PE=1 SV=3                                                         | PLEC_HUMAN                | uniprot_sprot_20120215.fasta | 531,783.90                    | 100.00%                            | 232                            | 326                             | 509                  | 3.43%                       | 51.90%                       |
| MOLM13_3A              | Spectrin alpha chain, brain OS=Homo sapiens GN=SPTAN1 PE=1 SV=3                                   | SPTA2_HUMAN               | uniprot_sprot_20120215.fasta | 284,542.70                    | 100.00%                            | 114                            | 168                             | 264                  | 1.78%                       | 56.90%                       |
| MOLM13_3A              | Spectrin beta chain, brain 1 OS=Homo sapiens GN=SPTBN1 PE=1 SV=2                                  | SPTB2_HUMAN               | uniprot_sprot_20120215.fasta | 274,613.40                    | 100.00%                            | 100                            | 155                             | 212                  | 1.43%                       | 54.40%                       |
| MOLM13_3A              | Filamin-A OS=Homo sapiens GN=FLNA PE=1 SV=4                                                       | FLNA_HUMAN                | uniprot_sprot_20120215.fasta | 280,729.40                    | 100.00%                            | 83                             | 123                             | 223                  | 1.50%                       | 43.90%                       |
| MOLM13_3A              | Filamin-B OS=Homo sapiens GN=FLNB PE=1 SV=2                                                       | FLNB_HUMAN                | uniprot_sprot_20120215.fasta | 278,158.80                    | 100.00%                            | 53                             | 69                              | 97                   | 0.65%                       | 32.10%                       |
| MOLM13_3A              | Keratin, type II cytoskeletal 2 epidermal OS=Homo sapiens GN=KRT2 PE=1 SV=2                       | K22E_HUMAN                | uniprot_sprot_20120215.fasta | 65,433.90                     | 100.00%                            | 39                             | 74                              | 366                  | 2.46%                       | 76.20%                       |
| MOLM13_3A              | Vimentin OS=Homo sapiens GN=VIM PE=1 SV=4                                                         | VIME_HUMAN                | uniprot_sprot_20120215.fasta | 53,652.70                     | 100.00%                            | 39                             | 75                              | 367                  | 2.47%                       | 73.60%                       |
| MOLM13_3A              | Alpha-actinin-4 OS=Homo sapiens GN=ACTN4 PE=1 SV=2                                                | ACTN4_HUMAN               | uniprot_sprot_20120215.fasta | 104,857.20                    | 100.00%                            | 36                             | 47                              | 59                   | 0.40%                       | 50.30%                       |
| MOLM13_3A              | Myosin-9 OS=Homo sapiens GN=MYH9 PE=1 SV=4                                                        | MYH9_HUMAN                | uniprot_sprot_20120215.fasta | 226,537.50                    | 100.00%                            | 32                             | 36                              | 41                   | 0.28%                       | 22.30%                       |
| MOLM13_3A              | Keratin, type I cytoskeletal 10 OS=Homo sapiens GN=KRT10 PE=1 SV=6                                | K1C10_HUMAN               | uniprot_sprot_20120215.fasta | 58,828.80                     | 100.00%                            | 30                             | 59                              | 378                  | 2.54%                       | 47.80%                       |
| MOLM13_3A              | DNA damage-binding protein 1 OS=Homo sapiens GN=DDB1 PE=1 SV=1                                    | DDB1_HUMAN                | uniprot_sprot_20120215.fasta | 126,970.20                    | 100.00%                            | 30                             | 45                              | 54                   | 0.36%                       | 30.10%                       |
| MOLM13_3A              | Keratin, type II cytoskeletal 1 OS=Homo sapiens GN=KRT1 PE=1 SV=6                                 | K2C1_HUMAN                | uniprot_sprot_20120215.fasta | 66,040.30                     | 100.00%                            | 29                             | 50                              | 216                  | 1.45%                       | 47.00%                       |
| MOLM13_3A              | Keratin, type I cytoskeletal 9 OS=Homo sapiens GN=KRT9 PE=1 SV=3                                  | K1C9_HUMAN                | uniprot_sprot_20120215.fasta | 62,065.90                     | 100.00%                            | 28                             | 50                              | 184                  | 1.24%                       | 72.10%                       |
| MOLM13_3A              | Keratin, type II cytoskeletal 4 OS=Homo sapiens GN=KRT4 PE=1 SV=4                                 | K2C4_HUMAN                | uniprot_sprot_20120215.fasta | 57,286.10                     | 100.00%                            | 21                             | 27                              | 32                   | 0.22%                       | 43.40%                       |
| MOLM13_3A              | Keratin, type II cytoskeletal 6C OS=Homo sapiens GN=KRT6C PE=1 SV=3                               | K2C6C_HUMAN               | uniprot_sprot_20120215.fasta | 60,026.70                     | 100.00%                            | 21                             | 25                              | 62                   | 0.42%                       | 42.00%                       |
| MOLM13_3A              | Actin, cytoplasmic 2 OS=Homo sapiens GN=ACTG1 PE=1 SV=1                                           | ACTG_HUMAN                | uniprot_sprot_20120215.fasta | 41,793.90                     | 100.00%                            | 20                             | 48                              | 573                  | 3.86%                       | 57.90%                       |
| MOLM13_3A              | Keratin, type I cytoskeletal 13 OS=Homo sapiens GN=KRT13 PE=1 SV=4                                | K1C13_HUMAN               | uniprot_sprot_20120215.fasta | 49,589.30                     | 100.00%                            | 19                             | 28                              | 35                   | 0.24%                       | 50.70%                       |
| MOLM13_3A              | Keratin, type II cytoskeletal 5 OS=Homo sapiens GN=KRT5 PE=1 SV=3                                 | K2C5_HUMAN                | uniprot_sprot_20120215.fasta | 62,379.60                     | 100.00%                            | 19                             | 21                              | 63                   | 0.42%                       | 45.90%                       |
| MOLM13_3A              | Leucine zipper protein 1 OS=Homo sapiens GN=LUPZ1 PE=1 SV=2                                       | LUPZ1_HUMAN               | uniprot_sprot_20120215.fasta | 120,277.40                    | 100.00%                            | 19                             | 20                              | 30                   | 0.20%                       | 23.50%                       |
| MOLM13_3A              | A-kinase anchor protein 2 OS=Homo sapiens GN=AKAP2 PE=1 SV=3                                      | AKAP2_HUMAN               | uniprot_sprot_20120215.fasta | 94,660.90                     | 100.00%                            | 18                             | 24                              | 30                   | 0.20%                       | 32.20%                       |
| MOLM13_3A              | Nucleolin OS=Homo sapiens GN=NCL PE=1 SV=3                                                        | NUCL_HUMAN                | uniprot_sprot_20120215.fasta | 76,615.90                     | 100.00%                            | 18                             | 25                              | 45                   | 0.30%                       | 29.20%                       |
| MOLM13_3A              | Nuclear transcription factor 1 OS=Homo sapiens GN=UBTF PE=1 SV=1                                  | UBF1_HUMAN                | uniprot_sprot_20120215.fasta | 89,409.60                     | 100.00%                            | 18                             | 27                              | 49                   | 0.33%                       | 25.30%                       |
| MOLM13_3A              | LIM domain only protein 7 OS=Homo sapiens GN=LMO7 PE=1 SV=3                                       | LMO7_HUMAN                | uniprot_sprot_20120215.fasta | 192,699.40                    | 100.00%                            | 17                             | 17                              | 20                   | 0.14%                       | 14.10%                       |
| MOLM13_3A              | Keratin, type I cytoskeletal 14 OS=Homo sapiens GN=KRT14 PE=1 SV=4                                | K1C14_HUMAN               | uniprot_sprot_20120215.fasta | 51,562.50                     | 100.00%                            | 16                             | 27                              | 63                   | 0.42%                       | 47.70%                       |
| MOLM13_3A              | Drebrin OS=Homo sapiens GN=DNB1 PE=1 SV=4                                                         | DREB_HUMAN                | uniprot_sprot_20120215.fasta | 71,428.60                     | 100.00%                            | 16                             | 22                              | 44                   | 0.30%                       | 36.10%                       |
| MOLM13_3A              | Tubulin beta chain OS=Homo sapiens GN=TUBB PE=1 SV=2                                              | TBB5_HUMAN                | uniprot_sprot_20120215.fasta | 49,670.60                     | 100.00%                            | 15                             | 19                              | 31                   | 0.21%                       | 49.80%                       |
| MOLM13_3A              | Septin-7 OS=Homo sapiens GN=SEPT7 PE=1 SV=2                                                       | SEPT7_HUMAN               | uniprot_sprot_20120215.fasta | 50,680.30                     | 100.00%                            | 13                             | 13                              | 18                   | 0.12%                       | 32.00%                       |
| MOLM13_3A              | Septin-9 OS=Homo sapiens GN=SEPT9 PE=1 SV=2                                                       | SEPT9_HUMAN               | uniprot_sprot_20120215.fasta | 65,403.30                     | 100.00%                            | 13                             | 15                              | 24                   | 0.16%                       | 30.70%                       |
| MOLM13_3A              | Heat shock cognate 71 kDa protein OS=Homo sapiens GN=HSPA8 PE=1 SV=1                              | HSP7C_HUMAN               | uniprot_sprot_20120215.fasta | 70,899.80                     | 100.00%                            | 13                             | 16                              | 21                   | 0.14%                       | 27.70%                       |
| MOLM13_3A              | Septin-2 OS=Homo sapiens GN=SEPT2 PE=1 SV=1                                                       | SEPT2_HUMAN               | uniprot_sprot_20120215.fasta | 41,488.20                     | 100.00%                            | 12                             | 17                              | 27                   | 0.18%                       | 54.30%                       |
| MOLM13_3A              | LIM domain and actin-binding protein 1 OS=Homo sapiens GN=LIMA1 PE=1 SV=1                         | LIMA1_HUMAN               | uniprot_sprot_20120215.fasta | 85,226.30                     | 100.00%                            | 12                             | 17                              | 27                   | 0.18%                       | 22.00%                       |
| MOLM13_3A              | Actin-related protein 2/3 complex subunit 2 OS=Homo sapiens GN=ARPC2 PE=1 SV=1                    | ARPC2_HUMAN               | uniprot_sprot_20120215.fasta | 34,333.70                     | 100.00%                            | 11                             | 14                              | 16                   | 0.11%                       | 42.00%                       |
| MOLM13_3A              | FACT complex subunit SPT16 OS=Homo sapiens GN=SPT16H PE=1 SV=1                                    | SP16H_HUMAN               | uniprot_sprot_20120215.fasta | 119,917.40                    | 100.00%                            | 11                             | 11                              | 12                   | 0.08%                       | 13.70%                       |
| MOLM13_3A              | 60S ribosomal protein L7 OS=Homo sapiens GN=RPL7 PE=1 SV=1                                        | RL7_HUMAN                 | uniprot_sprot_20120215.fasta | 29,227.70                     | 100.00%                            | 10                             | 12                              | 16                   | 0.11%                       | 37.50%                       |
| MOLM13_3A              | F-actin-capping protein subunit alpha-1 OS=Homo sapiens GN=CAPZA1 PE=1 SV=1                       | CAZA1_HUMAN               | uniprot_sprot_20120215.fasta | 32,923.20                     | 100.00%                            | 9                              | 11                              | 15                   | 0.10%                       | 50.30%                       |
| MOLM13_3A              | Lymphocyte-specific protein 1 OS=Homo sapiens GN=LSP1 PE=1 SV=1                                   | LSP1_HUMAN                | uniprot_sprot_20120215.fasta | 37,191.10                     | 100.00%                            | 9                              | 12                              | 21                   | 0.14%                       | 35.10%                       |
| MOLM13_3A              | 60S ribosomal protein L6 OS=Homo sapiens GN=RPL6 PE=1 SV=3                                        | RL6_HUMAN                 | uniprot_sprot_20120215.fasta | 32,729.30                     | 100.00%                            | 9                              | 10                              | 23                   | 0.16%                       | 34.00%                       |
| MOLM13_3A              | Acidic leucine-rich nuclear phosphoprotein 32 family member A OS=Homo sapiens GN=AN3A2_HUMAN      | AN3A2_HUMAN               | uniprot_sprot_20120215.fasta | 28,586.10                     | 100.00%                            | 9                              | 10                              | 11                   | 0.07%                       | 21.70%                       |
| MOLM13_3A              | AP-3 complex subunit delta-1 OS=Homo sapiens GN=AP3D1 PE=1 SV=1                                   | AP3D1_HUMAN               | uniprot_sprot_20120215.fasta | 130,162.10                    | 100.00%                            | 9                              | 12                              | 13                   | 0.09%                       | 10.60%                       |
| MOLM13_3A              | AP-3 complex subunit beta-1 OS=Homo sapiens GN=AP3B1 PE=1 SV=3                                    | AP3B1_HUMAN               | uniprot_sprot_20120215.fasta | 121,324.00                    | 100.00%                            | 9                              | 9                               | 9                    | 0.06%                       | 10.50%                       |
| MOLM13_3A              | Keratin, type I cytoskeletal 16 OS=Homo sapiens GN=KRT16 PE=1 SV=4                                | K1C16_HUMAN               | uniprot_sprot_20120215.fasta | 51,269.00                     | 100.00%                            | 8                              | 10                              | 20                   | 0.14%                       | 38.90%                       |
| MOLM13_3A              | 60S acidic ribosomal protein P0 OS=Homo sapiens GN=RPLP0 PE=1 SV=1                                | RLA0_HUMAN                | uniprot_sprot_20120215.fasta | 34,274.30                     | 100.00%                            | 8                              | 10                              | 12                   | 0.08%                       | 36.90%                       |
| MOLM13_3A              | Cornulin OS=Homo sapiens GN=CRNN PE=1 SV=1                                                        | CRNN_HUMAN                | uniprot_sprot_20120215.fasta | 53,530.10                     | 100.00%                            | 8                              | 9                               | 9                    | 0.06%                       | 32.10%                       |
| MOLM13_3A              | Tubulin alpha-1A chain OS=Homo sapiens GN=TUBA1A PE=1 SV=1                                        | TBA1A_HUMAN               | uniprot_sprot_20120215.fasta | 50,135.70                     | 100.00%                            | 8                              | 9                               | 16                   | 0.11%                       | 25.10%                       |
| MOLM13_3A              | 60S ribosomal protein L7a OS=Homo sapiens GN=RPL7A PE=1 SV=2                                      | RL7A_HUMAN                | uniprot_sprot_20120215.fasta | 29,996.30                     | 100.00%                            | 8                              | 8                               | 9                    | 0.06%                       | 23.70%                       |
| MOLM13_3A              | Phostensin OS=Homo sapiens GN=PPR1R18 PE=1 SV=1                                                   | PPR18_HUMAN               | uniprot_sprot_20120215.fasta | 67,942.80                     | 100.00%                            | 8                              | 9                               | 18                   | 0.12%                       | 21.20%                       |
| MOLM13_3A              | DDB1- and CUL4-associated factor 10 OS=Homo sapiens GN=DCAF10 PE=1 SV=1                           | DCA10_HUMAN               | uniprot_sprot_20120215.fasta | 60,582.90                     | 100.00%                            | 8                              | 11                              | 17                   | 0.11%                       | 17.50%                       |
| MOLM13_3A              | Alpha-adducin OS=Homo sapiens GN=ADD1 PE=1 SV=2                                                   | ADDA_HUMAN                | uniprot_sprot_20120215.fasta | 80,955.90                     | 100.00%                            | 8                              | 8                               | 14                   | 0.09%                       | 15.50%                       |
| MOLM13_3A              | Neurabin-2 OS=Homo sapiens GN=PPP1R9B PE=1 SV=2                                                   | NEB2_HUMAN                | uniprot_sprot_20120215.fasta | 89,192.20                     | 100.00%                            | 8                              | 8                               | 8                    | 0.05%                       | 15.10%                       |
| MOLM13_3A              | FACT complex subunit SSRP1 OS=Homo sapiens GN=SSRP1 PE=1 SV=1                                     | SSRP1_HUMAN               | uniprot_sprot_20120215.fasta | 81,077.60                     | 100.00%                            | 8                              | 8                               | 11                   | 0.07%                       | 12.40%                       |
| MOLM13_3A              | Unconventional myosin-Ig OS=Homo sapiens GN=MYO1G PE=1 SV=2                                       | MYO1G_HUMAN               | uniprot_sprot_20120215.fasta | 116,443.60                    | 100.00%                            | 8                              | 9                               | 9                    | 0.06%                       | 10.10%                       |
| MOLM13_3A              | Cytosolin-A OS=Homo sapiens GN=SPECCL1 PE=1 SV=2                                                  | CYTSA_HUMAN               | uniprot_sprot_20120215.fasta | 124,605.40                    | 100.00%                            | 8                              | 9                               | 14                   | 0.09%                       | 9.20%                        |
| MOLM13_3A              | Filaggrin-2 OS=Homo sapiens GN=FLG2 PE=1 SV=1                                                     | FILA2_HUMAN               | uniprot_sprot_20120215.fasta | 248,052.30                    | 100.00%                            | 8                              | 12                              | 24                   | 0.16%                       | 7.74%                        |
| MOLM13_3A              | 60S acidic ribosomal protein P2 OS=Homo sapiens GN=RPL2 PE=1 SV=1                                 | RLA2_HUMAN                | uniprot_sprot_20120215.fasta | 11,665.50                     | 100.00%                            | 7                              | 8                               | 10                   | 0.07%                       | 85.20%                       |
| MOLM13_3A              | Protein SET OS=Homo sapiens GN=SET PE=1 SV=3                                                      | SET_HUMAN                 | uniprot_sprot_20120215.fasta | 33,489.40                     | 100.00%                            | 7                              | 7                               | 15                   | 0.10%                       | 41.00%                       |
| MOLM13_3A              | Activated RNA polymerase II transcriptional coactivator p15 OS=Homo sapiens GN=GTCP4_HUMAN        | GTCP4_HUMAN               | uniprot_sprot_20120215.fasta | 14,395.90                     | 100.00%                            | 7                              | 10                              | 51                   | 0.34%                       | 37.80%                       |
| MOLM13_3A              | General transcription factor IIF subunit 2 OS=Homo sapiens GN=GTTF2 PE=1 SV=2                     | GTTF2_HUMAN               | uniprot_sprot_20120215.fasta | 28,380.30                     | 100.00%                            | 7                              | 8                               | 9                    | 0.06%                       | 31.30%                       |
| MOLM13_3A              | Septin-6 OS=Homo sapiens GN=SEPT6 PE=1 SV=4                                                       | SEPT6_HUMAN               | uniprot_sprot_20120215.fasta | 49,717.60                     | 100.00%                            | 7                              | 8                               | 10                   | 0.07%                       | 26.50%                       |
| MOLM13_3A              | EF-hand domain-containing protein D2 OS=Homo sapiens GN=EFHD2 PE=1 SV=1                           | EFHD2_HUMAN               | uniprot_sprot_20120215.fasta | 26,698.40                     | 100.00%                            | 7                              | 9                               | 9                    | 0.06%                       | 25.80%                       |
| MOLM13_3A              | F-actin-capping protein subunit beta OS=Homo sapiens GN=CAPZB PE=1 SV=4                           | CAPZB_HUMAN               | uniprot_sprot_20120215.fasta | 31,351.60                     | 100.00%                            | 7                              | 10                              | 10                   | 0.07%                       | 25.60%                       |
| MOLM13_3A              | 60S ribosomal protein L3 OS=Homo sapiens GN=RPL3 PE=1 SV=2                                        | RL3_HUMAN                 | uniprot_sprot_20120215.fasta | 46,109.50                     | 100.00%                            | 7                              | 8                               | 12                   | 0.08%                       | 23.10%                       |
| MOLM13_3A              | Lupus La protein OS=Homo sapiens GN=LSP1 PE=1 SV=2                                                | LA_HUMAN                  | uniprot_sprot_20120215.fasta | 46,839.00                     | 100.00%                            | 7                              | 7                               | 10                   | 0.07%                       | 22.30%                       |
| MOLM13_3A              | Serine/threonine-protein phosphatase PP1-alpha catalytic subunit OS=Homo sapiens GN=PP1A_HUMAN    | PP1A_HUMAN                | uniprot_sprot_20120215.fasta | 37,513.90                     | 100.00%                            | 7                              | 8                               | 12                   | 0.08%                       | 20.60%                       |
| MOLM13_3A              | Putative pre-mRNA-splicing factor ATP-dependent RNA helicase DHX15 OS=Homo sapiens GN=DHX15_HUMAN | DHX15_HUMAN               | uniprot_sprot_20120215.fasta | 90,935.20                     | 100.00%                            | 7                              | 9                               | 12                   | 0.08%                       | 9.81%                        |
| MOLM13_3A              | Annexin A1 OS=Homo sapiens GN=ANXA1 PE=1 SV=2                                                     | ANXA1_HUMAN               | uniprot_sprot_20120215.fasta | 38,715.90                     | 100.00%                            | 6                              | 6                               | 7                    | 0.05%                       | 27.20%                       |
| MOLM13_3A              | 60S ribosomal protein L5 OS=Homo sapiens GN=RPL5 PE=1 SV=3                                        | RL5_HUMAN                 | uniprot_sprot_20120215.fasta | 34,363.50                     | 100.00%                            | 6                              | 10                              | 13                   | 0.09%                       | 20.50%                       |
| MOLM13_3A              | Actin-related protein 3 OS=Homo sapiens GN=ACTR3 PE=1 SV=3                                        | ARP3_HUMAN                | uniprot_sprot_20120215.fasta | 47,371.90                     | 100.00%                            | 6                              | 7                               | 8                    | 0.05%                       | 19.60%                       |
| MOLM13_3A              | Hematopoietic lineage cell-specific protein OS=Homo sapiens GN=HCL1 PE=1 SV=1                     | HCL1_HUMAN                | uniprot_sprot_20120215.fasta | 54,013.20                     | 100.00%                            | 6                              | 7                               | 13                   | 0.09%                       | 16.50%                       |
| MOLM13_3A              | Hornerin OS=Homo sapiens GN=HRNR PE=1 SV=2                                                        | HRNR_HUMAN                | uniprot_sprot_20120215.fasta | 282,372.70                    | 100.00%                            | 6                              | 7                               | 12                   | 0.08%                       | 5.19%                        |
| MOLM13_3A              | Serine/arginine repetitive matrix protein 2 OS=Homo sapiens GN=SRRM2 PE=1 SV=1                    | SRRM2_HUMAN               | uniprot_sprot_20120215.fasta | 299,621.60                    | 100.00%                            | 6                              | 6                               | 10                   | 0.07%                       | 3.09%                        |
| MOLM13_3A              | Signal recognition particle 14 kDa protein OS=Homo sapiens GN=SRP14 PE=1 SV=1                     | SRP14_HUMAN               | uniprot_sprot_20120215.fasta | 14,570.60                     | 100.00%                            | 5                              | 7                               | 8                    | 0.05%                       | 55.10%                       |
| MOLM13_3A              | Nuclease-sensitive element-binding protein 1 OS=Homo sapiens GN=YBX1 PE=1 SV=1                    | YBX1_HUMAN                | uniprot_sprot_20120215.fasta | 35,923.80                     | 100.00%                            | 5                              | 6                               | 10                   | 0.07%                       | 31.80%                       |
| MOLM13_3A              | Actin-related protein 2/3 complex subunit 3 OS=Homo sapiens GN=ARPC3 PE=1 SV=1                    | ARPC3_HUMAN               | uniprot_sprot_20120215.fasta | 20,547.80                     | 100.00%                            | 5                              | 7                               | 8                    | 0.05%                       | 30.90%                       |
| MOLM13_3A              | Actin-related protein 2/3 complex subunit 1B OS=Homo sapiens GN=ARPC1B PE=1 SV=1                  | ARPC1B_HUMAN              | uniprot_sprot_20120215.fasta | 40,949.80                     | 100.00%                            | 5                              | 6                               | 9                    | 0.06%                       | 19.40%                       |
| MOLM13_3A              | Arginase-1 OS=Homo sapiens GN=ARG1 PE=1 SV=2                                                      | ARG1_HUMAN                | uniprot_sprot_20120215.fasta | 34,736.10                     | 100.00%                            | 5                              | 6                               | 6                    | 0.04%                       | 18.90%                       |
| MOLM13_3A              | 60S ribosomal protein L4 OS=Homo sapiens GN=RPL4 PE=1 SV=5                                        | RL4_HUMAN                 | uniprot_sprot_20120215.fasta | 47,699.10                     | 100.00%                            | 5                              | 7                               | 12                   | 0.08%                       | 18.30%                       |
| MOLM13_3A              | Actin-related protein 2 OS=Homo sapiens GN=ACTR2 PE=1 SV=1                                        | ARP2_HUMAN                | uniprot_sprot_20120215.fasta | 44,761.70                     | 100.00%                            | 5                              | 6                               | 9                    | 0.06%                       | 16.80%                       |
| MOLM13_3A              | Acidic leucine-rich nuclear phosphoprotein 32 family member E OS=Homo sapiens GN=AN3A2E_HUMAN     | AN3A2E_HUMAN              | uniprot_sprot_20120215.fasta | 30,693.30                     | 100.00%                            | 5                              | 7                               | 8                    | 0.05%                       | 14.90%                       |
| MOLM13_3A              | General transcription factor IIF subunit 1 OS=Homo sapiens GN=GTTF1 PE=1 SV=1                     | GTTF1_HUMAN               | uniprot_sprot_20120215.fasta | 58,241.90                     | 100.00%                            | 5                              | 7                               | 10                   | 0.07%                       | 14.90%                       |
| MOLM13_3A              | Keratin, type II cytoskeletal 78 OS=Homo sapiens GN=KRT7                                          |                           |                              |                               |                                    |                                |                                 |                      |                             |                              |

|           |                                                                                                  |                  |                              |            |         |   |   |    |       |        |
|-----------|--------------------------------------------------------------------------------------------------|------------------|------------------------------|------------|---------|---|---|----|-------|--------|
| MOLM13_3A | 60S ribosomal protein L13 OS=Homo sapiens GN=RPL13 PE=1 SV=4                                     | RL13_HUMAN       | uniprot_sprot_20120215.fasta | 24,262.20  | 100.00% | 4 | 5 | 7  | 0.05% | 19.90% |
| MOLM13_3A | 60S ribosomal protein L10a OS=Homo sapiens GN=RPL10A PE=1 SV=2                                   | RL10A_HUMAN      | uniprot_sprot_20120215.fasta | 24,832.00  | 100.00% | 4 | 5 | 5  | 0.03% | 19.80% |
| MOLM13_3A | Tropomodulin-3 OS=Homo sapiens GN=TMOD3 PE=1 SV=1                                                | TMOD3_HUMAN      | uniprot_sprot_20120215.fasta | 39,596.10  | 100.00% | 4 | 4 | 5  | 0.03% | 17.00% |
| MOLM13_3A | 60S ribosomal protein L10 OS=Homo sapiens GN=RPL10 PE=1 SV=4                                     | RL10_HUMAN       | uniprot_sprot_20120215.fasta | 24,604.60  | 100.00% | 4 | 4 | 4  | 0.03% | 15.40% |
| MOLM13_3A | Tropomyosin alpha-3 chain OS=Homo sapiens GN=TPM3 PE=1 SV=1                                      | TPM3_HUMAN       | uniprot_sprot_20120215.fasta | 32,820.20  | 100.00% | 4 | 4 | 4  | 0.03% | 14.80% |
| MOLM13_3A | 78 kDa glucose-regulated protein OS=Homo sapiens GN=HSPA5 PE=1 SV=2                              | GRP78_HUMAN      | uniprot_sprot_20120215.fasta | 72,334.70  | 100.00% | 4 | 4 | 4  | 0.03% | 14.70% |
| MOLM13_3A | Galactin-9B OS=Homo sapiens GN=LALGAL59B PE=2 SV=3                                               | LEG9B_HUMAN,LE   | uniprot_sprot_20120215.fasta | 39,659.70  | 100.00% | 4 | 4 | 4  | 0.03% | 13.80% |
| MOLM13_3A | Keratin, type II cytoskeletal 1b OS=Homo sapiens GN=KRT77 PE=1 SV=3                              | K2C1B_HUMAN      | uniprot_sprot_20120215.fasta | 61,901.90  | 100.00% | 4 | 4 | 6  | 0.04% | 11.60% |
| MOLM13_3A | Plastin-2 OS=Homo sapiens GN=LCP1 PE=1 SV=6                                                      | PLS1_HUMAN       | uniprot_sprot_20120215.fasta | 70,291.20  | 100.00% | 4 | 4 | 4  | 0.03% | 9.89%  |
| MOLM13_3A | Elongation factor 1-alpha 1 OS=Homo sapiens GN=EEF1A1 PE=1 SV=1                                  | EF1A1_HUMAN,EF   | uniprot_sprot_20120215.fasta | 50,141.20  | 100.00% | 4 | 4 | 5  | 0.03% | 8.87%  |
| MOLM13_3A | Bromodomain-containing protein 3 OS=Homo sapiens GN=BRD3 PE=1 SV=1                               | BRD3_HUMAN       | uniprot_sprot_20120215.fasta | 79,542.50  | 100.00% | 4 | 4 | 8  | 0.05% | 8.13%  |
| MOLM13_3A | Nucleolar and coiled-body phosphoprotein 1 OS=Homo sapiens GN=NOLC1 PE=1 SV=1                    | NOLC1_HUMAN      | uniprot_sprot_20120215.fasta | 73,604.20  | 100.00% | 4 | 4 | 4  | 0.03% | 7.87%  |
| MOLM13_3A | Junction plakoglobin OS=Homo sapiens GN=JUP PE=1 SV=3                                            | PLAK_HUMAN       | uniprot_sprot_20120215.fasta | 81,745.90  | 100.00% | 4 | 4 | 6  | 0.04% | 7.79%  |
| MOLM13_3A | Pre-mRNA-splicing factor CWC22 homolog OS=Homo sapiens GN=CWC22 PE=1 SV=1                        | SCWC22_HUMAN     | uniprot_sprot_20120215.fasta | 105,470.20 | 100.00% | 4 | 4 | 4  | 0.03% | 6.06%  |
| MOLM13_3A | Desmoglein-1 OS=Homo sapiens GN=DSG1 PE=1 SV=2                                                   | DSG1_HUMAN       | uniprot_sprot_20120215.fasta | 113,748.90 | 100.00% | 4 | 4 | 6  | 0.04% | 5.43%  |
| MOLM13_3A | Filaggrin OS=Homo sapiens GN=FLG PE=1 SV=3                                                       | FILA_HUMAN       | uniprot_sprot_20120215.fasta | 435,145.70 | 100.00% | 4 | 4 | 5  | 0.03% | 2.02%  |
| MOLM13_3A | Cystatin-B OS=Homo sapiens GN=CSTB PE=1 SV=2                                                     | CYTB_HUMAN       | uniprot_sprot_20120215.fasta | 11,139.30  | 100.00% | 3 | 3 | 3  | 0.02% | 45.90% |
| MOLM13_3A | Keratin, type II cytoskeletal 6A OS=Homo sapiens GN=KRT6A PE=1 SV=3                              | K2C6A_HUMAN      | uniprot_sprot_20120215.fasta | 60,046.40  | 100.00% | 3 | 4 | 8  | 0.05% | 42.00% |
| MOLM13_3A | Small nuclear ribonucleoprotein Sm D2 OS=Homo sapiens GN=SNRPD2 PE=1 SV=5                        | SMD2_HUMAN       | uniprot_sprot_20120215.fasta | 13,527.10  | 100.00% | 3 | 3 | 3  | 0.02% | 31.40% |
| MOLM13_3A | 60S ribosomal protein L27 OS=Homo sapiens GN=RPL27 PE=1 SV=2                                     | RL27_HUMAN       | uniprot_sprot_20120215.fasta | 15,798.40  | 100.00% | 3 | 5 | 5  | 0.03% | 30.10% |
| MOLM13_3A | Histone H4 OS=Homo sapiens GN=HIST1H4A PE=1 SV=2                                                 | H4_HUMAN         | uniprot_sprot_20120215.fasta | 11,367.70  | 100.00% | 3 | 4 | 4  | 0.03% | 29.10% |
| MOLM13_3A | 60S ribosomal protein L21 OS=Homo sapiens GN=RPL21 PE=1 SV=2                                     | RL21_HUMAN       | uniprot_sprot_20120215.fasta | 18,565.00  | 100.00% | 3 | 5 | 6  | 0.04% | 27.50% |
| MOLM13_3A | Protein FAM101B OS=Homo sapiens GN=FAM101B PE=1 SV=1                                             | F101B_HUMAN      | uniprot_sprot_20120215.fasta | 22,882.20  | 100.00% | 3 | 3 | 3  | 0.02% | 26.60% |
| MOLM13_3A | Myosin light polypeptide 6 OS=Homo sapiens GN=MYL6 PE=1 SV=2                                     | MYL6_HUMAN       | uniprot_sprot_20120215.fasta | 16,929.80  | 100.00% | 3 | 3 | 3  | 0.02% | 23.80% |
| MOLM13_3A | Small proline-rich protein 3 OS=Homo sapiens GN=SPRR3 PE=1 SV=2                                  | SPRR3_HUMAN      | uniprot_sprot_20120215.fasta | 18,153.00  | 100.00% | 3 | 3 | 3  | 0.02% | 23.10% |
| MOLM13_3A | Keratin, type I cytoskeletal 17 OS=Homo sapiens GN=KRT17 PE=1 SV=2                               | K1C17_HUMAN      | uniprot_sprot_20120215.fasta | 48,106.70  | 100.00% | 3 | 4 | 8  | 0.05% | 22.90% |
| MOLM13_3A | 60S ribosomal protein L28 OS=Homo sapiens GN=RPL28 PE=1 SV=3                                     | RL28_HUMAN       | uniprot_sprot_20120215.fasta | 15,747.90  | 100.00% | 3 | 5 | 7  | 0.05% | 20.40% |
| MOLM13_3A | 60S ribosomal protein L11 OS=Homo sapiens GN=RPL11 PE=1 SV=2                                     | RL11_HUMAN       | uniprot_sprot_20120215.fasta | 20,253.20  | 100.00% | 3 | 3 | 3  | 0.02% | 19.70% |
| MOLM13_3A | Serine/arginine-rich splicing factor 2 OS=Homo sapiens GN=SRSF2 PE=1 SV=4                        | SRSF2_HUMAN      | uniprot_sprot_20120215.fasta | 25,477.10  | 100.00% | 3 | 5 | 17 | 0.11% | 18.60% |
| MOLM13_3A | 60S ribosomal protein L19 OS=Homo sapiens GN=RPL19 PE=1 SV=1                                     | RL19_HUMAN       | uniprot_sprot_20120215.fasta | 23,467.40  | 100.00% | 3 | 3 | 3  | 0.02% | 17.30% |
| MOLM13_3A | 60S ribosomal protein L13a OS=Homo sapiens GN=RPL13A PE=1 SV=2                                   | RL13A_HUMAN      | uniprot_sprot_20120215.fasta | 23,577.90  | 100.00% | 3 | 3 | 5  | 0.03% | 14.80% |
| MOLM13_3A | 40S ribosomal protein S9 OS=Homo sapiens GN=RPS9 PE=1 SV=3                                       | RS9_HUMAN        | uniprot_sprot_20120215.fasta | 22,592.50  | 100.00% | 3 | 3 | 3  | 0.02% | 14.40% |
| MOLM13_3A | Serine/arginine-rich splicing factor 1 OS=Homo sapiens GN=SRSF1 PE=1 SV=2                        | SRSF1_HUMAN      | uniprot_sprot_20120215.fasta | 27,745.10  | 100.00% | 3 | 3 | 3  | 0.02% | 14.10% |
| MOLM13_3A | 14-3-3 protein zeta/delta OS=Homo sapiens GN=YWHAZ PE=1 SV=1                                     | 1433Z_HUMAN      | uniprot_sprot_20120215.fasta | 27,745.90  | 100.00% | 3 | 4 | 4  | 0.03% | 13.90% |
| MOLM13_3A | 60S ribosomal protein L8 OS=Homo sapiens GN=RPL8 PE=1 SV=2                                       | RL8_HUMAN        | uniprot_sprot_20120215.fasta | 28,024.80  | 100.00% | 3 | 4 | 4  | 0.03% | 13.60% |
| MOLM13_3A | U1 small nuclear ribonucleoprotein A OS=Homo sapiens GN=SNRPA PE=1 SV=3                          | SNRPA_HUMAN      | uniprot_sprot_20120215.fasta | 31,280.50  | 100.00% | 3 | 3 | 3  | 0.02% | 13.10% |
| MOLM13_3A | 40S ribosomal protein S3 OS=Homo sapiens GN=RPS3 PE=1 SV=2                                       | RS3_HUMAN        | uniprot_sprot_20120215.fasta | 26,688.60  | 100.00% | 3 | 3 | 4  | 0.03% | 12.80% |
| MOLM13_3A | Protein DEK OS=Homo sapiens GN=DEK PE=1 SV=1                                                     | DEK_HUMAN        | uniprot_sprot_20120215.fasta | 42,675.90  | 100.00% | 3 | 4 | 5  | 0.03% | 10.70% |
| MOLM13_3A | Annexin A2 OS=Homo sapiens GN=ANXA2 PE=1 SV=2                                                    | ANXA2_HUMAN      | uniprot_sprot_20120215.fasta | 38,606.10  | 100.00% | 3 | 3 | 4  | 0.03% | 10.30% |
| MOLM13_3A | Gasdermin-A OS=Homo sapiens GN=GSDMA PE=2 SV=4                                                   | GSDMA_HUMAN      | uniprot_sprot_20120215.fasta | 49,365.60  | 100.00% | 3 | 3 | 3  | 0.02% | 9.44%  |
| MOLM13_3A | Serpin B12 OS=Homo sapiens GN=SERPINB12 PE=1 SV=1                                                | SPB12_HUMAN      | uniprot_sprot_20120215.fasta | 46,277.70  | 100.00% | 3 | 3 | 3  | 0.02% | 8.40%  |
| MOLM13_3A | Heterogeneous nuclear ribonucleoprotein M OS=Homo sapiens GN=HNRNPM PE=HNRNPM_HUMAN              | HNRNPM_HUMAN     | uniprot_sprot_20120215.fasta | 77,517.30  | 100.00% | 3 | 3 | 3  | 0.02% | 7.26%  |
| MOLM13_3A | RNA-binding protein EWS OS=Homo sapiens GN=EWSR1 PE=1 SV=1                                       | EWS_HUMAN        | uniprot_sprot_20120215.fasta | 68,478.40  | 100.00% | 3 | 4 | 7  | 0.05% | 7.16%  |
| MOLM13_3A | Signal recognition particle 68 kDa protein OS=Homo sapiens GN=SRP68 PE=1 SV=3                    | SRP68_HUMAN      | uniprot_sprot_20120215.fasta | 70,732.00  | 100.00% | 3 | 3 | 3  | 0.02% | 5.74%  |
| MOLM13_3A | Taperin OS=Homo sapiens GN=TPRN PE=2 SV=2                                                        | TPRN_HUMAN       | uniprot_sprot_20120215.fasta | 75,556.70  | 100.00% | 3 | 3 | 4  | 0.03% | 5.61%  |
| MOLM13_3A | Heterogeneous nuclear ribonucleoprotein U-like protein 1 OS=Homo sapiens GN=HNR1L_HUMAN          | HNR1L_HUMAN      | uniprot_sprot_20120215.fasta | 95,739.70  | 100.00% | 3 | 3 | 5  | 0.03% | 5.61%  |
| MOLM13_3A | Serum albumin OS=Homo sapiens GN=ALB PE=1 SV=2                                                   | ALBU_HUMAN       | uniprot_sprot_20120215.fasta | 69,366.90  | 100.00% | 3 | 3 | 3  | 0.02% | 5.25%  |
| MOLM13_3A | RNA polymerase-associated protein RTF1 homolog OS=Homo sapiens GN=RTF1_HUMAN                     | RTF1_HUMAN       | uniprot_sprot_20120215.fasta | 80,315.70  | 100.00% | 3 | 3 | 6  | 0.04% | 3.80%  |
| MOLM13_3A | Eukaryotic translation initiation factor 3 subunit C OS=Homo sapiens GN=EIF3C PE=1 SV=2          | EIF3C_HUMAN      | uniprot_sprot_20120215.fasta | 105,347.20 | 100.00% | 3 | 3 | 3  | 0.02% | 3.18%  |
| MOLM13_3A | Supervillin OS=Homo sapiens GN=SVIL PE=1 SV=2                                                    | SVIL_HUMAN       | uniprot_sprot_20120215.fasta | 247,747.10 | 100.00% | 3 | 3 | 4  | 0.03% | 2.03%  |
| MOLM13_3A | Desmoplakin OS=Homo sapiens GN=DSP PE=1 SV=3                                                     | DSP_HUMAN        | uniprot_sprot_20120215.fasta | 331,781.40 | 100.00% | 3 | 3 | 3  | 0.02% | 1.08%  |
| MOLM13_3A | Keratin, type II cytoskeletal 6B OS=Homo sapiens GN=KRT6B PE=1 SV=5                              | K2C6B_HUMAN      | uniprot_sprot_20120215.fasta | 60,068.60  | 99.80%  | 2 | 2 | 4  | 0.03% | 40.20% |
| MOLM13_3A | Actin, alpha skeletal muscle OS=Homo sapiens GN=ACTA1 PE=1 SV=1                                  | ACTS_HUMAN       | uniprot_sprot_20120215.fasta | 42,052.20  | 99.80%  | 2 | 5 | 21 | 0.14% | 34.20% |
| MOLM13_3A | Thioredoxin OS=Homo sapiens GN=TXN PE=1 SV=3                                                     | THIO_HUMAN       | uniprot_sprot_20120215.fasta | 11,737.30  | 99.80%  | 2 | 2 | 2  | 0.01% | 22.90% |
| MOLM13_3A | Acidic leucine-rich nuclear phosphoprotein 32 family member B OS=Homo sapiens GN=AN32B_HUMAN     | AN32B_HUMAN      | uniprot_sprot_20120215.fasta | 28,788.70  | 99.80%  | 2 | 4 | 6  | 0.04% | 22.30% |
| MOLM13_3A | Protein S100-A8 OS=Homo sapiens GN=S100A8 PE=1 SV=1                                              | S10A8_HUMAN      | uniprot_sprot_20120215.fasta | 10,835.00  | 99.80%  | 2 | 3 | 3  | 0.02% | 19.40% |
| MOLM13_3A | Serine/threonine-protein phosphatase PP1-gamma catalytic subunit OS=Homo sapiens GN=PPP1G_HUMAN  | PPP1G_HUMAN      | uniprot_sprot_20120215.fasta | 36,985.60  | 99.80%  | 2 | 2 | 2  | 0.01% | 19.20% |
| MOLM13_3A | 60S ribosomal protein L36 OS=Homo sapiens GN=RPL36 PE=1 SV=3                                     | RL36_HUMAN       | uniprot_sprot_20120215.fasta | 12,254.20  | 99.90%  | 2 | 2 | 2  | 0.01% | 19.00% |
| MOLM13_3A | 60S ribosomal protein L12 OS=Homo sapiens GN=RPL12 PE=1 SV=1                                     | RL12_HUMAN       | uniprot_sprot_20120215.fasta | 17,819.10  | 99.80%  | 2 | 3 | 3  | 0.02% | 18.80% |
| MOLM13_3A | Alpha-actinin-1 OS=Homo sapiens GN=ACTN1 PE=1 SV=2                                               | ACTN1_HUMAN      | uniprot_sprot_20120215.fasta | 103,061.10 | 99.80%  | 2 | 2 | 2  | 0.01% | 18.20% |
| MOLM13_3A | Beta-actin-like protein 2 OS=Homo sapiens GN=ACTBL2 PE=1 SV=2                                    | ACTBL_HUMAN      | uniprot_sprot_20120215.fasta | 42,004.20  | 99.80%  | 2 | 3 | 4  | 0.03% | 17.00% |
| MOLM13_3A | 60S ribosomal protein L23a OS=Homo sapiens GN=RPL23A PE=1 SV=1                                   | RL23A_HUMAN      | uniprot_sprot_20120215.fasta | 17,696.20  | 100.00% | 2 | 2 | 2  | 0.01% | 15.40% |
| MOLM13_3A | Prolactin-inducible protein OS=Homo sapiens GN=PIP PE=1 SV=1                                     | PIP_HUMAN        | uniprot_sprot_20120215.fasta | 16,573.10  | 99.80%  | 2 | 2 | 3  | 0.02% | 15.10% |
| MOLM13_3A | 60S ribosomal protein L9 OS=Homo sapiens GN=RPL9 PE=1 SV=1                                       | RL9_HUMAN        | uniprot_sprot_20120215.fasta | 21,863.70  | 99.80%  | 2 | 2 | 3  | 0.02% | 15.10% |
| MOLM13_3A | 60S ribosomal protein L27a OS=Homo sapiens GN=RPL27A PE=1 SV=2                                   | RL27A_HUMAN      | uniprot_sprot_20120215.fasta | 16,561.40  | 99.80%  | 2 | 2 | 4  | 0.03% | 14.20% |
| MOLM13_3A | Keratin, type II cytoskeletal 3 OS=Homo sapiens GN=KRT3 PE=1 SV=3                                | K2C3_HUMAN       | uniprot_sprot_20120215.fasta | 64,418.90  | 99.80%  | 2 | 3 | 3  | 0.02% | 14.20% |
| MOLM13_3A | 60S ribosomal protein L24 OS=Homo sapiens GN=RPL24 PE=1 SV=1                                     | RL24_HUMAN       | uniprot_sprot_20120215.fasta | 17,779.50  | 99.80%  | 2 | 3 | 3  | 0.02% | 14.00% |
| MOLM13_3A | 60S ribosomal protein L18 OS=Homo sapiens GN=RPL18 PE=1 SV=2                                     | RL18_HUMAN       | uniprot_sprot_20120215.fasta | 21,635.20  | 100.00% | 2 | 2 | 5  | 0.03% | 12.80% |
| MOLM13_3A | Trypsin-1 OS=Homo sapiens GN=PRSS1 PE=1 SV=1                                                     | TRY1_HUMAN       | uniprot_sprot_20120215.fasta | 26,558.10  | 99.80%  | 2 | 3 | 9  | 0.06% | 12.10% |
| MOLM13_3A | 40S ribosomal protein S8 OS=Homo sapiens GN=RPS8 PE=1 SV=2                                       | RS8_HUMAN        | uniprot_sprot_20120215.fasta | 24,206.40  | 99.80%  | 2 | 2 | 2  | 0.01% | 11.50% |
| MOLM13_3A | Glyceraldehyde-3-phosphate dehydrogenase OS=Homo sapiens GN=GAPDH PE=1 SV=4                      | G3P_HUMAN        | uniprot_sprot_20120215.fasta | 36,053.40  | 99.80%  | 2 | 2 | 2  | 0.01% | 11.30% |
| MOLM13_3A | 60S ribosomal protein L14 OS=Homo sapiens GN=RPL14 PE=1 SV=4                                     | RL14_HUMAN       | uniprot_sprot_20120215.fasta | 23,432.30  | 99.80%  | 2 | 2 | 2  | 0.01% | 11.20% |
| MOLM13_3A | 60S ribosomal protein L26-like 1 OS=Homo sapiens GN=RPL26L1 PE=1 SV=1                            | RL26L_HUMAN,RL   | uniprot_sprot_20120215.fasta | 17,256.30  | 99.80%  | 2 | 2 | 2  | 0.01% | 11.00% |
| MOLM13_3A | Serine/arginine-rich splicing factor 7 OS=Homo sapiens GN=SRSF7 PE=1 SV=1                        | SRSF7_HUMAN      | uniprot_sprot_20120215.fasta | 27,367.50  | 99.90%  | 2 | 2 | 2  | 0.01% | 10.90% |
| MOLM13_3A | 40S ribosomal protein S6 OS=Homo sapiens GN=RPS6 PE=1 SV=1                                       | RS6_HUMAN        | uniprot_sprot_20120215.fasta | 28,681.70  | 99.80%  | 2 | 2 | 2  | 0.01% | 10.80% |
| MOLM13_3A | mRNA turnover protein 4 homolog OS=Homo sapiens GN=MRT04 PE=1 SV=2                               | MRT4_HUMAN       | uniprot_sprot_20120215.fasta | 27,561.30  | 99.80%  | 2 | 3 | 3  | 0.02% | 10.50% |
| MOLM13_3A | 60S ribosomal protein L30 OS=Homo sapiens GN=RPL30 PE=1 SV=2                                     | RL30_HUMAN       | uniprot_sprot_20120215.fasta | 12,784.70  | 99.80%  | 2 | 4 | 4  | 0.03% | 10.40% |
| MOLM13_3A | 40S ribosomal protein SA OS=Homo sapiens GN=RPSA PE=1 SV=4                                       | RSSA_HUMAN       | uniprot_sprot_20120215.fasta | 32,854.10  | 99.80%  | 2 | 2 | 2  | 0.01% | 10.20% |
| MOLM13_3A | Small nuclear ribonucleoprotein-associated proteins B and B' OS=Homo sapiens GN=SNRNPB_HUMAN,RSU | SNRNPB_HUMAN,RSU | uniprot_sprot_20120215.fasta | 24,610.60  | 99.90%  | 2 | 3 | 3  | 0.02% | 9.58%  |
| MOLM13_3A | Caspase-14 OS=Homo sapiens GN=CASP14 PE=1 SV=2                                                   | CASP_E_HUMAN     | uniprot_sprot_20120215.fasta | 27,679.80  | 100.00% | 2 | 2 | 2  | 0.01% | 9.50%  |
| MOLM13_3A | BAG family molecular chaperone regulator 2 OS=Homo sapiens GN=BAG2 PE=1 SV=2                     | BAG2_HUMAN       | uniprot_sprot_20120215.fasta | 23,772.50  | 99.80%  | 2 | 2 | 2  | 0.01% | 9.48%  |
| MOLM13_3A | WD repeat-containing protein 61 OS=Homo sapiens GN=WDR61 PE=1 SV=1                               | WDR61_HUMAN      | uniprot_sprot_20120215.fasta | 33,580.80  | 99.80%  | 2 | 2 | 3  | 0.02% | 9.18%  |
| MOLM13_3A | 60S ribosomal protein L18a OS=Homo sapiens GN=RPL18A PE=1 SV=2                                   | RL18A_HUMAN      | uniprot_sprot_20120215.fasta | 20,762.60  | 99.70%  | 2 | 2 | 2  | 0.01% | 9.09%  |
| MOLM13_3A | Casein kinase II subunit alpha OS=Homo sapiens GN=CSNK2A1 PE=1 SV=1                              | CK2K1_HUMAN      | uniprot_sprot_20120215.fasta | 45,144.50  | 99.90%  | 2 | 2 | 2  | 0.01% | 8.44%  |
| MOLM13_3A | RNA-binding protein FUS OS=Homo sapiens GN=FUS PE=1 SV=1                                         | FUS_HUMAN        | uniprot_sprot_20120215.fasta | 53,426.00  | 99.80%  | 2 | 4 | 7  | 0.05% | 7.60%  |
| MOLM13_3A | 40S ribosomal protein S4, X isoform OS=Homo sapiens GN=RPS4X PE=1 SV=2                           | RS4X_HUMAN       | uniprot_sprot_20120215.fasta | 29,599.30  | 99.80%  | 2 | 2 | 2  | 0.01% | 7.60%  |
| MOLM13_3A | 40S ribosomal protein S2 OS=Homo sapiens GN=RPS2 PE=1 SV=2                                       | RS2_HUMAN        | uniprot_sprot_20120215.fasta | 31,325.20  | 99.70%  | 2 | 2 | 2  | 0.01% | 7.51%  |
| MOLM13_3A | Coronin-2A OS=Homo sapiens GN=CORO2A PE=2 SV=2                                                   | COR2A_HUMAN      | uniprot_sprot_20120215.fasta | 59,764.70  | 99.80%  | 2 | 2 | 2  | 0.01% | 6.48%  |
| MOLM13_3A | Protein phosphatase 1G OS=Homo sapiens GN=PPM1G PE=1 SV=1                                        | PPM1G_HUMAN      | uniprot_sprot_20120215.fasta | 59,271.90  | 100.00% | 2 | 2 | 2  | 0.01% | 6.41%  |
| MOLM13_3A | Zinc finger Ran-binding domain-containing protein 2 OS=                                          |                  |                              |            |         |   |   |    |       |        |

|           |                                                                                             |                              |            |         |   |   |   |       |        |
|-----------|---------------------------------------------------------------------------------------------|------------------------------|------------|---------|---|---|---|-------|--------|
| MOLM13_3A | RNA polymerase-associated protein CTR9 homolog OS=Homo sapiens GN=CTR9 CTR9_HUMAN           | uniprot_sprot_20120215.fasta | 133,506.60 | 99.80%  | 2 | 2 | 3 | 0.02% | 2.73%  |
| MOLM13_3A | Cyclin-dependent kinase 11A OS=Homo sapiens GN=CDK11A PE=1 SV=4 CD11A_HUMAN,Cl              | uniprot_sprot_20120215.fasta | 91,363.30  | 99.80%  | 2 | 2 | 2 | 0.01% | 2.55%  |
| MOLM13_3A | Protein-glutamine gamma-glutamyltransferase K OS=Homo sapiens GN=TGM1 PTGM1_HUMAN           | uniprot_sprot_20120215.fasta | 89,786.00  | 99.80%  | 2 | 2 | 2 | 0.01% | 2.33%  |
| MOLM13_3A | Protein phosphatase 1 regulatory subunit 12A OS=Homo sapiens GN=PPP1R12A MYPT1_HUMAN        | uniprot_sprot_20120215.fasta | 115,283.40 | 100.00% | 2 | 2 | 2 | 0.01% | 2.04%  |
| MOLM13_3A | Keratin, type II cuticular Hb2 OS=Homo sapiens GN=KRT82 PE=1 SV=3 KRT82_HUMAN               | uniprot_sprot_20120215.fasta | 56,653.40  | 99.80%  | 2 | 2 | 5 | 0.03% | 1.75%  |
| MOLM13_3A | Eukaryotic translation initiation factor 5B OS=Homo sapiens GN=EIF5B PE=1 SV=-1 IF2P_HUMAN  | uniprot_sprot_20120215.fasta | 138,831.50 | 100.00% | 2 | 2 | 3 | 0.02% | 1.72%  |
| MOLM13_3A | Absent in melanoma 1 protein OS=Homo sapiens GN=AIM1 PE=1 SV=3 AIM1_HUMAN                   | uniprot_sprot_20120215.fasta | 188,677.20 | 99.80%  | 2 | 2 | 2 | 0.01% | 1.63%  |
| MOLM13_3A | Pericentrin OS=Homo sapiens GN=PCNT PE=1 SV=4 PCNT_HUMAN                                    | uniprot_sprot_20120215.fasta | 378,033.40 | 99.90%  | 2 | 2 | 2 | 0.01% | 0.69%  |
| MOLM13_3A | Histone H2A type 1-D OS=Homo sapiens GN=HIST1H2AD PE=1 SV=2 H2A1D_HUMAN,H                   | uniprot_sprot_20120215.fasta | 14,108.10  | 99.60%  | 1 | 1 | 2 | 0.01% | 14.60% |
| MOLM13_3A | 40S ribosomal protein S26 OS=Homo sapiens GN=RPS26 PE=1 SV=3 RS26_HUMAN                     | uniprot_sprot_20120215.fasta | 13,015.50  | 99.70%  | 1 | 1 | 1 | 0.01% | 13.00% |
| MOLM13_3A | Histone H2B type 1-C/E/F/G/I OS=Homo sapiens GN=HIST1H2BC PE=1 SV=4 H2B1C_HUMAN,H           | uniprot_sprot_20120215.fasta | 13,944.60  | 99.60%  | 1 | 2 | 3 | 0.02% | 11.90% |
| MOLM13_3A | Small nuclear ribonucleoprotein Sm D1 OS=Homo sapiens GN=SNRPD1 PE=1 SV=SMD1_HUMAN          | uniprot_sprot_20120215.fasta | 13,281.90  | 99.60%  | 1 | 2 | 2 | 0.01% | 10.90% |
| MOLM13_3A | Protein S100-A14 OS=Homo sapiens GN=S100A14 PE=1 SV=1 S10AE_HUMAN                           | uniprot_sprot_20120215.fasta | 11,662.20  | 99.50%  | 1 | 1 | 1 | 0.01% | 10.60% |
| MOLM13_3A | Peroxiredoxin-1 OS=Homo sapiens GN=PRDX1 PE=1 SV=1 PRDX1_HUMAN                              | uniprot_sprot_20120215.fasta | 22,110.90  | 98.10%  | 1 | 1 | 1 | 0.01% | 10.60% |
| MOLM13_3A | Protein FAM107B OS=Homo sapiens GN=FAM107B PE=1 SV=1 F107B_HUMAN                            | uniprot_sprot_20120215.fasta | 15,557.90  | 98.60%  | 1 | 1 | 1 | 0.01% | 9.92%  |
| MOLM13_3A | Calmodulin-like protein 5 OS=Homo sapiens GN=CALML5 PE=1 SV=2 CALL5_HUMAN                   | uniprot_sprot_20120215.fasta | 15,892.90  | 98.30%  | 1 | 1 | 3 | 0.02% | 9.59%  |
| MOLM13_3A | 14-3-3 protein sigma OS=Homo sapiens GN=SFN PE=1 SV=1 1433S_HUMAN                           | uniprot_sprot_20120215.fasta | 27,774.80  | 98.80%  | 1 | 1 | 1 | 0.01% | 8.47%  |
| MOLM13_3A | 60S ribosomal protein L35 OS=Homo sapiens GN=RPL35 PE=1 SV=2 RL35_HUMAN                     | uniprot_sprot_20120215.fasta | 14,552.50  | 99.60%  | 1 | 1 | 1 | 0.01% | 8.13%  |
| MOLM13_3A | 40S ribosomal protein S13 OS=Homo sapiens GN=RPS13 PE=1 SV=2 RS13_HUMAN                     | uniprot_sprot_20120215.fasta | 17,223.30  | 98.20%  | 1 | 1 | 1 | 0.01% | 7.95%  |
| MOLM13_3A | 40S ribosomal protein S18 OS=Homo sapiens GN=RPS18 PE=1 SV=3 RS18_HUMAN                     | uniprot_sprot_20120215.fasta | 17,719.30  | 98.70%  | 1 | 1 | 1 | 0.01% | 7.89%  |
| MOLM13_3A | 60S ribosomal protein L34 OS=Homo sapiens GN=RPL34 PE=1 SV=3 RL34_HUMAN                     | uniprot_sprot_20120215.fasta | 13,293.10  | 98.00%  | 1 | 1 | 1 | 0.01% | 6.84%  |
| MOLM13_3A | U2 small nuclear ribonucleoprotein A' OS=Homo sapiens GN=SNRPA1 PE=1 SV=2 RU2A_HUMAN        | uniprot_sprot_20120215.fasta | 28,417.10  | 99.10%  | 1 | 1 | 1 | 0.01% | 6.67%  |
| MOLM13_3A | Peroxiredoxin-2 OS=Homo sapiens GN=PRDX2 PE=1 SV=5 PRDX2_HUMAN                              | uniprot_sprot_20120215.fasta | 21,892.40  | 98.50%  | 1 | 1 | 1 | 0.01% | 5.56%  |
| MOLM13_3A | Bleomycin hydrolase OS=Homo sapiens GN=BLMH PE=1 SV=1 BLMH_HUMAN                            | uniprot_sprot_20120215.fasta | 52,562.60  | 99.60%  | 1 | 1 | 2 | 0.01% | 4.40%  |
| MOLM13_3A | Heterogeneous nuclear ribonucleoprotein H OS=Homo sapiens GN=HNRNPH1 PEHNRH1_HUMAN          | uniprot_sprot_20120215.fasta | 49,229.80  | 99.90%  | 1 | 1 | 1 | 0.01% | 3.79%  |
| MOLM13_3A | ADP-ribosylation factor-like protein 6-interacting protein 4 OS=Homo sapiens GN=AR6P4_HUMAN | uniprot_sprot_20120215.fasta | 38,396.20  | 99.40%  | 1 | 1 | 1 | 0.01% | 3.33%  |
| MOLM13_3A | Serine/arginine-rich splicing factor 5 OS=Homo sapiens GN=SRSF5 PE=1 SV=1 SRSF5_HUMAN       | uniprot_sprot_20120215.fasta | 31,264.80  | 99.30%  | 1 | 1 | 1 | 0.01% | 3.31%  |
| MOLM13_3A | Parafibromin OS=Homo sapiens GN=CDC73 PE=1 SV=1 CDC73_HUMAN                                 | uniprot_sprot_20120215.fasta | 60,577.50  | 98.00%  | 1 | 1 | 1 | 0.01% | 2.07%  |
| MOLM13_3A | Bifunctional glutamate/proline-tRNA ligase OS=Homo sapiens GN=EPRS PE=1 SVSYP_HUMAN         | uniprot_sprot_20120215.fasta | 170,593.20 | 99.40%  | 1 | 1 | 1 | 0.01% | 0.60%  |
