# Supplementary material
Source: PubMed Central journal article supplement (PMC5359771)
Supplement: NIHMS849092-supplement-Table_2.pdf [file NIHMS849092-supplement-Table_2.pdf]

**Extended Data Table 7.** Differentially methylated cytosines (DMCs) in LSK mice compared to wild-type controls, identified by MethyKit

| chr  | start    | end      | strand | <i>p</i> -value | <i>q</i> -value | methylation difference |
|------|----------|----------|--------|-----------------|-----------------|------------------------|
| chr1 | 6359020  | 6359020  | -      | 1.42E-09        | 4.58E-08        | -27.15657767           |
| chr1 | 9878413  | 9878413  | +      | 0.00011778      | 0.0014518       | -27.73279352           |
| chr1 | 9908620  | 9908620  | +      | 0               | 0               | -25.03079114           |
| chr1 | 9908649  | 9908649  | +      | 0               | 0               | -26.32648499           |
| chr1 | 10008904 | 10008904 | +      | 0               | 0               | -28.84877359           |
| chr1 | 10008940 | 10008940 | +      | 0               | 0               | -33.41372749           |
| chr1 | 13219606 | 13219606 | -      | 1.11E-16        | 7.26E-15        | -28.17699326           |
| chr1 | 13225545 | 13225545 | -      | 0.00113242      | 0.00977285      | -29.51388889           |
| chr1 | 18141481 | 18141481 | -      | 0.00067983      | 0.00642559      | -26.01299103           |
| chr1 | 20803511 | 20803511 | +      | 0               | 0               | -32.02000103           |
| chr1 | 20803563 | 20803563 | -      | 0               | 0               | -33.32448349           |
| chr1 | 20817785 | 20817785 | +      | 0.00098194      | 0.00869897      | -30.42622951           |
| chr1 | 20997163 | 20997163 | -      | 1.23E-05        | 0.00019862      | -31.5503876            |
| chr1 | 23584738 | 23584738 | -      | 0.00034737      | 0.00366418      | -28.10820184           |
| chr1 | 33993699 | 33993699 | +      | 9.40E-12        | 3.92E-10        | -25.55874955           |
| chr1 | 33993934 | 33993934 | -      | 6.85E-07        | 1.45E-05        | -26.96992767           |
| chr1 | 34074796 | 34074796 | +      | 8.54E-09        | 2.47E-07        | -36.94896653           |
| chr1 | 34075028 | 34075028 | -      | 2.34E-14        | 1.27E-12        | -51.28144281           |
| chr1 | 34077684 | 34077684 | +      | 2.43E-06        | 4.63E-05        | -29.27331568           |
| chr1 | 34103959 | 34103959 | -      | 0               | 0               | -31.17695295           |
| chr1 | 34473615 | 34473615 | -      | 0.00015751      | 0.00186709      | -27.63798701           |
| chr1 | 34536465 | 34536465 | -      | 0               | 0               | -25.25626983           |
| chr1 | 34807113 | 34807113 | -      | 0               | 0               | -29.91746862           |
| chr1 | 34807160 | 34807160 | +      | 0               | 0               | -25.09678094           |
| chr1 | 35688172 | 35688172 | -      | 3.26E-05        | 0.00047338      | -28.95902547           |
| chr1 | 35974005 | 35974005 | +      | 0               | 0               | -28.40116178           |
| chr1 | 36076224 | 36076224 | -      | 1.81E-11        | 7.32E-10        | -32.28282828           |
| chr1 | 36254919 | 36254919 | +      | 4.40E-09        | 1.33E-07        | -40.90909091           |
| chr1 | 36254937 | 36254937 | +      | 1.40E-06        | 2.80E-05        | -29.33372642           |
| chr1 | 36254955 | 36254955 | +      | 7.18E-07        | 1.52E-05        | -36.62092624           |
| chr1 | 36254957 | 36254957 | +      | 3.75E-08        | 9.87E-07        | -38.89379229           |
| chr1 | 36255169 | 36255169 | -      | 9.40E-06        | 0.00015664      | -33.64102564           |
| chr1 | 36255193 | 36255193 | -      | 0               | 0               | -34.00372254           |
| chr1 | 36255205 | 36255205 | +      | 0               | 0               | -34.63673489           |
| chr1 | 36255206 | 36255206 | -      | 0               | 0               | -42.58237788           |

|      |          |          |   |            |            |              |
|------|----------|----------|---|------------|------------|--------------|
| chr1 | 36255229 | 36255229 | - | 0          | 0          | -29.81341639 |
| chr1 | 36313922 | 36313922 | - | 0          | 0          | -28.46743774 |
| chr1 | 36313950 | 36313950 | - | 0          | 0          | -27.77795392 |
| chr1 | 36313954 | 36313954 | - | 0          | 0          | -27.56304038 |
| chr1 | 36457176 | 36457176 | + | 1.28E-13   | 6.45E-12   | -28.98908027 |
| chr1 | 36580174 | 36580174 | + | 0          | 0          | -29.83897589 |
| chr1 | 36607184 | 36607184 | - | 8.20E-09   | 2.38E-07   | -25.11107026 |
| chr1 | 36704759 | 36704759 | + | 9.86E-06   | 0.0001634  | 37.03703704  |
| chr1 | 36764563 | 36764563 | + | 4.20E-11   | 1.63E-09   | -28.57237103 |
| chr1 | 36771106 | 36771106 | - | 0          | 0          | -27.06377781 |
| chr1 | 37480055 | 37480055 | - | 1.67E-07   | 3.96E-06   | -25.34661285 |
| chr1 | 37624224 | 37624224 | + | 7.73E-07   | 1.62E-05   | 41.37931034  |
| chr1 | 38384911 | 38384911 | - | 6.13E-11   | 2.34E-09   | -54.17032485 |
| chr1 | 38626475 | 38626475 | + | 0          | 0          | -39.34643184 |
| chr1 | 38626506 | 38626506 | + | 0          | 0          | -40.28265104 |
| chr1 | 38626513 | 38626513 | + | 0          | 0          | -37.40214156 |
| chr1 | 38626602 | 38626602 | - | 0          | 0          | -32.00870816 |
| chr1 | 38626625 | 38626625 | - | 0          | 0          | -38.82666667 |
| chr1 | 38626648 | 38626648 | + | 0          | 0          | -34.27015986 |
| chr1 | 38626649 | 38626649 | - | 0          | 0          | -40.37751578 |
| chr1 | 38626657 | 38626657 | + | 0          | 0          | -34.1665717  |
| chr1 | 38626709 | 38626709 | + | 0          | 0          | -36.05442177 |
| chr1 | 38626710 | 38626710 | - | 0          | 0          | -38.13844183 |
| chr1 | 38626759 | 38626759 | + | 0          | 0          | -26.01741918 |
| chr1 | 38626831 | 38626831 | - | 0          | 0          | -34.16833364 |
| chr1 | 38626871 | 38626871 | + | 0          | 0          | -44.41795909 |
| chr1 | 38626885 | 38626885 | - | 3.57E-07   | 7.98E-06   | -47.28837877 |
| chr1 | 38626897 | 38626897 | + | 0          | 0          | -33.06408209 |
| chr1 | 38626898 | 38626898 | - | 1.07E-06   | 2.18E-05   | -44.18938307 |
| chr1 | 38626904 | 38626904 | - | 0.00047187 | 0.00473855 | -26.80057389 |
| chr1 | 39047001 | 39047001 | - | 4.12E-11   | 1.60E-09   | -26.60744244 |
| chr1 | 39105819 | 39105819 | + | 0          | 0          | -35.28535562 |
| chr1 | 39105824 | 39105824 | + | 0          | 0          | -47.1158429  |
| chr1 | 39105825 | 39105825 | - | 0          | 0          | -42.0203811  |
| chr1 | 39105832 | 39105832 | + | 0          | 0          | -48.21836916 |
| chr1 | 39105833 | 39105833 | - | 0          | 0          | -44.91447258 |
| chr1 | 39105871 | 39105871 | - | 0          | 0          | -39.41823298 |
| chr1 | 39361883 | 39361883 | + | 5.56E-07   | 1.20E-05   | -26.761293   |
| chr1 | 39361920 | 39361920 | - | 0          | 0          | -30.26658666 |
| chr1 | 39361959 | 39361959 | - | 0          | 0          | -26.98163082 |
| chr1 | 39361969 | 39361969 | + | 0          | 0          | -28.19822373 |

|      |          |          |   |            |            |              |
|------|----------|----------|---|------------|------------|--------------|
| chr1 | 39361970 | 39361970 | - | 0          | 0          | -35.57136643 |
| chr1 | 39361979 | 39361979 | - | 0          | 0          | -43.92713249 |
| chr1 | 39361991 | 39361991 | - | 0          | 0          | -43.81850279 |
| chr1 | 39687266 | 39687266 | - | 0          | 0          | -25.94159589 |
| chr1 | 39720744 | 39720744 | + | 0          | 0          | -28.21147722 |
| chr1 | 39720778 | 39720778 | - | 7.50E-12   | 3.16E-10   | -27.45697464 |
| chr1 | 39720785 | 39720785 | - | 1.97E-11   | 7.92E-10   | -38.99374711 |
| chr1 | 39720820 | 39720820 | - | 5.78E-09   | 1.72E-07   | -26.39140271 |
| chr1 | 39720938 | 39720938 | - | 0          | 0          | -25.55790368 |
| chr1 | 39760973 | 39760973 | - | 0          | 0          | -27.21670617 |
| chr1 | 39842790 | 39842790 | + | 0          | 0          | -31.34433872 |
| chr1 | 39842867 | 39842867 | + | 1.17E-09   | 3.82E-08   | -29.50819672 |
| chr1 | 40179624 | 40179624 | + | 4.78E-07   | 1.04E-05   | -31.91489362 |
| chr1 | 40325950 | 40325950 | + | 0          | 0          | -38.27596375 |
| chr1 | 40325955 | 40325955 | + | 0          | 0          | -31.98505102 |
| chr1 | 40325968 | 40325968 | + | 0          | 0          | -44.09198486 |
| chr1 | 40325969 | 40325969 | - | 0          | 0          | -43.05917312 |
| chr1 | 40325987 | 40325987 | + | 0          | 0          | -47.16315288 |
| chr1 | 40325988 | 40325988 | - | 0          | 0          | -42.17279822 |
| chr1 | 40326002 | 40326002 | - | 0          | 0          | -44.49423816 |
| chr1 | 40326019 | 40326019 | - | 0          | 0          | -34.44699093 |
| chr1 | 40682049 | 40682049 | + | 5.12E-05   | 0.0007047  | 38.0952381   |
| chr1 | 40682055 | 40682055 | + | 6.15E-05   | 0.00082684 | 38.0952381   |
| chr1 | 40682061 | 40682061 | + | 5.12E-05   | 0.0007047  | 38.0952381   |
| chr1 | 40682075 | 40682075 | + | 0.00098633 | 0.00873028 | 34.76190476  |
| chr1 | 40715038 | 40715038 | + | 7.60E-08   | 1.91E-06   | -27.60387344 |
| chr1 | 40874691 | 40874691 | - | 1.22E-07   | 2.95E-06   | -32.28041902 |
| chr1 | 43164245 | 43164245 | - | 0          | 0          | -31.50575859 |
| chr1 | 43502890 | 43502890 | - | 1.62E-13   | 8.10E-12   | -33.08035714 |
| chr1 | 53978333 | 53978333 | - | 0          | 0          | -30.07246377 |
| chr1 | 53988740 | 53988740 | + | 0          | 0          | -26.65867907 |
| chr1 | 54905817 | 54905817 | + | 1.42E-14   | 7.84E-13   | -25.3761959  |
| chr1 | 54905899 | 54905899 | + | 0          | 0          | -31.41579732 |
| chr1 | 54905900 | 54905900 | - | 0          | 0          | -28.99471641 |
| chr1 | 54905937 | 54905937 | - | 0          | 0          | -30.03742195 |
| chr1 | 55226298 | 55226298 | + | 0          | 0          | -31.18830239 |
| chr1 | 55226310 | 55226310 | + | 0          | 0          | -34.30758479 |
| chr1 | 55226312 | 55226312 | + | 0          | 0          | -29.37908497 |
| chr1 | 55226336 | 55226336 | + | 0          | 0          | -37.63582966 |
| chr1 | 55382359 | 55382359 | - | 4.34E-05   | 0.00061012 | -27.90697674 |
| chr1 | 56955382 | 56955382 | + | 1.84E-10   | 6.63E-09   | -32.82646392 |

|      |          |          |   |            |            |              |
|------|----------|----------|---|------------|------------|--------------|
| chr1 | 56956033 | 56956033 | - | 0.00028079 | 0.00306209 | -26.84848485 |
| chr1 | 56984594 | 56984594 | - | 4.49E-13   | 2.14E-11   | -30.87599234 |
| chr1 | 56984614 | 56984614 | - | 4.44E-16   | 2.79E-14   | -28.30249419 |
| chr1 | 56984632 | 56984632 | - | 6.31E-05   | 0.00084524 | -31.27944225 |
| chr1 | 57608309 | 57608309 | + | 1.11E-16   | 7.26E-15   | -32.68770923 |
| chr1 | 57772932 | 57772932 | - | 0.0002988  | 0.00322659 | -42          |
| chr1 | 57772962 | 57772962 | - | 1.62E-05   | 0.00025519 | -41.17647059 |
| chr1 | 57989974 | 57989974 | + | 1.78E-12   | 8.02E-11   | -28.64219114 |
| chr1 | 59139645 | 59139645 | - | 5.48E-06   | 9.65E-05   | -27.40610329 |
| chr1 | 59376334 | 59376334 | + | 0          | 0          | -36.65835828 |
| chr1 | 59376348 | 59376348 | + | 0          | 0          | -26.9696757  |
| chr1 | 59376350 | 59376350 | + | 0          | 0          | -28.99774506 |
| chr1 | 59376379 | 59376379 | + | 0          | 0          | -28.68988685 |
| chr1 | 59376380 | 59376380 | - | 0          | 0          | -27.75389101 |
| chr1 | 59376392 | 59376392 | - | 0          | 0          | -44.50787604 |
| chr1 | 59376412 | 59376412 | - | 0          | 0          | -35.85545667 |
| chr1 | 59423382 | 59423382 | - | 0          | 0          | -43.10191366 |
| chr1 | 59484390 | 59484390 | - | 0          | 0          | -32.23534336 |
| chr1 | 59484405 | 59484405 | + | 0          | 0          | -33.2423254  |
| chr1 | 59484503 | 59484503 | + | 2.13E-14   | 1.16E-12   | -33.05193876 |
| chr1 | 59484684 | 59484684 | - | 0          | 0          | -33.12348668 |
| chr1 | 59610092 | 59610092 | + | 0          | 0          | -32.56918126 |
| chr1 | 59610096 | 59610096 | + | 0          | 0          | -25.51710186 |
| chr1 | 59610104 | 59610104 | + | 0          | 0          | -27.28007367 |
| chr1 | 59610157 | 59610157 | + | 0          | 0          | -26.22895078 |
| chr1 | 59610158 | 59610158 | - | 0          | 0          | -32.67063788 |
| chr1 | 59610210 | 59610210 | - | 0          | 0          | -27.26075098 |
| chr1 | 61143398 | 61143398 | - | 0          | 0          | -26.64247041 |
| chr1 | 61379555 | 61379555 | - | 5.18E-08   | 1.34E-06   | -28.1177977  |
| chr1 | 62182008 | 62182008 | - | 0          | 0          | -29.00941708 |
| chr1 | 62985323 | 62985323 | + | 0.00036971 | 0.00386194 | -43.45454545 |
| chr1 | 64088737 | 64088737 | + | 1.36E-09   | 4.40E-08   | -34.26242074 |
| chr1 | 64117050 | 64117050 | - | 1.72E-12   | 7.73E-11   | -29.16935195 |
| chr1 | 64338369 | 64338369 | - | 1.32E-06   | 2.65E-05   | -44.44444444 |
| chr1 | 64338396 | 64338396 | - | 1.91E-06   | 3.72E-05   | -42.85714286 |
| chr1 | 64735107 | 64735107 | - | 0          | 0          | -25.65342956 |
| chr1 | 64735116 | 64735116 | - | 0          | 0          | -32.48574511 |
| chr1 | 64735118 | 64735118 | - | 0          | 0          | -33.7706846  |
| chr1 | 64735131 | 64735131 | - | 0          | 0          | -30.41579732 |
| chr1 | 64735135 | 64735135 | - | 0          | 0          | -35.69652779 |
| chr1 | 64735140 | 64735140 | + | 0          | 0          | -26.94233519 |

|      |          |          |   |            |            |              |
|------|----------|----------|---|------------|------------|--------------|
| chr1 | 64735146 | 64735146 | + | 1.11E-16   | 7.26E-15   | -25.02717982 |
| chr1 | 64735148 | 64735148 | + | 0          | 0          | -32.33188863 |
| chr1 | 64735149 | 64735149 | - | 0          | 0          | -33.57808278 |
| chr1 | 64735177 | 64735177 | + | 0          | 0          | -31.21428571 |
| chr1 | 64735178 | 64735178 | - | 0          | 0          | -31.75642109 |
| chr1 | 64735899 | 64735899 | - | 5.21E-14   | 2.73E-12   | -55.81633962 |
| chr1 | 64735907 | 64735907 | - | 3.52E-09   | 1.08E-07   | -43.99585921 |
| chr1 | 64735911 | 64735911 | - | 4.38E-13   | 2.10E-11   | -50.25009619 |
| chr1 | 64735914 | 64735914 | + | 0          | 0          | -30.19511023 |
| chr1 | 64735926 | 64735926 | + | 0          | 0          | -31.58323526 |
| chr1 | 64735927 | 64735927 | - | 0          | 0          | -29.42681868 |
| chr1 | 64735945 | 64735945 | - | 0          | 0          | -27.35172342 |
| chr1 | 64735946 | 64735946 | + | 0          | 0          | -26.67783706 |
| chr1 | 64735969 | 64735969 | + | 0          | 0          | -34.5582975  |
| chr1 | 64868010 | 64868010 | + | 0          | 0          | -26.48534278 |
| chr1 | 64868041 | 64868041 | - | 0          | 0          | -25.98717716 |
| chr1 | 65109885 | 65109885 | + | 0          | 0          | -25.71031663 |
| chr1 | 69493649 | 69493649 | + | 2.79E-07   | 6.36E-06   | -33.4622824  |
| chr1 | 69680384 | 69680384 | + | 4.32E-06   | 7.77E-05   | -27.95454545 |
| chr1 | 69680777 | 69680777 | - | 2.51E-06   | 4.76E-05   | -32.44581215 |
| chr1 | 71893742 | 71893742 | - | 0.00029452 | 0.00318703 | -30.77922078 |
| chr1 | 72108737 | 72108737 | + | 5.94E-06   | 0.00010367 | -30.8988764  |
| chr1 | 72184502 | 72184502 | - | 0          | 0          | -25.64590994 |
| chr1 | 72255632 | 72255632 | + | 4.12E-08   | 1.08E-06   | -30.16194332 |
| chr1 | 72577621 | 72577621 | - | 1.78E-15   | 1.06E-13   | -25.44034091 |
| chr1 | 72952087 | 72952087 | - | 0          | 0          | -26.18319321 |
| chr1 | 73827446 | 73827446 | + | 2.70E-05   | 0.00040073 | -25.2780154  |
| chr1 | 73990631 | 73990631 | - | 3.66E-11   | 1.43E-09   | 36.17021277  |
| chr1 | 74013613 | 74013613 | - | 1.25E-07   | 3.01E-06   | -43.38512241 |
| chr1 | 74018435 | 74018435 | - | 1.09E-08   | 3.10E-07   | -30.58064516 |
| chr1 | 74018455 | 74018455 | - | 0          | 0          | -39.24634886 |
| chr1 | 74027681 | 74027681 | - | 0          | 0          | -26.31053525 |
| chr1 | 74027687 | 74027687 | + | 0          | 0          | -33.48413881 |
| chr1 | 74027688 | 74027688 | - | 0          | 0          | -34.64833645 |
| chr1 | 74206865 | 74206865 | - | 0          | 0          | -28.27272727 |
| chr1 | 74275325 | 74275325 | + | 0          | 0          | -37.96010577 |
| chr1 | 74275326 | 74275326 | - | 0.00015217 | 0.00181118 | -26.62271805 |
| chr1 | 74275333 | 74275333 | + | 0          | 0          | -44.20250791 |
| chr1 | 74275334 | 74275334 | - | 4.86E-14   | 2.55E-12   | -27.84391534 |
| chr1 | 74594183 | 74594183 | - | 0.00106661 | 0.00930792 | -31.01135191 |
| chr1 | 74782673 | 74782673 | - | 0          | 0          | -44.1267725  |

|      |          |          |   |          |            |              |
|------|----------|----------|---|----------|------------|--------------|
| chr1 | 74782677 | 74782677 | - | 0        | 0          | -40.02486887 |
| chr1 | 74782684 | 74782684 | - | 0        | 0          | -30.91675885 |
| chr1 | 74783639 | 74783639 | + | 0        | 0          | -35.61537864 |
| chr1 | 74783745 | 74783745 | - | 0        | 0          | -48.0793854  |
| chr1 | 74793457 | 74793457 | + | 0        | 0          | -31.78403756 |
| chr1 | 74793478 | 74793478 | + | 0        | 0          | -30.6892026  |
| chr1 | 74793489 | 74793489 | + | 0        | 0          | -29.89201809 |
| chr1 | 74793495 | 74793495 | + | 0        | 0          | -27.67327107 |
| chr1 | 74793523 | 74793523 | - | 0        | 0          | -29.94964475 |
| chr1 | 74824886 | 74824886 | + | 0        | 0          | -25.0780413  |
| chr1 | 75015945 | 75015945 | + | 1.61E-09 | 5.15E-08   | -30.78680374 |
| chr1 | 75015965 | 75015965 | + | 6.35E-10 | 2.15E-08   | -31.10012193 |
| chr1 | 75015974 | 75015974 | + | 0        | 0          | -50.33986405 |
| chr1 | 75128021 | 75128021 | + | 5.47E-05 | 0.00074634 | -28.67494824 |
| chr1 | 75219851 | 75219851 | + | 0        | 0          | -25.16866905 |
| chr1 | 75219875 | 75219875 | - | 0        | 0          | -26.24194889 |
| chr1 | 75219877 | 75219877 | - | 0        | 0          | -32.3445111  |
| chr1 | 75219926 | 75219926 | + | 0        | 0          | -45.80907336 |
| chr1 | 75219935 | 75219935 | + | 0        | 0          | -40.21016289 |
| chr1 | 75219938 | 75219938 | + | 0        | 0          | -34.32731387 |
| chr1 | 75220019 | 75220019 | + | 2.38E-10 | 8.48E-09   | -33.02407705 |
| chr1 | 75220020 | 75220020 | - | 0        | 0          | -34.6147185  |
| chr1 | 75252481 | 75252481 | - | 1.04E-10 | 3.85E-09   | -28.46593766 |
| chr1 | 75344705 | 75344705 | - | 1.22E-15 | 7.41E-14   | -41.9036096  |
| chr1 | 75344847 | 75344847 | - | 4.33E-06 | 7.79E-05   | -30.29271613 |
| chr1 | 75344857 | 75344857 | - | 1.84E-06 | 3.59E-05   | -29.15140415 |
| chr1 | 75344896 | 75344896 | + | 0        | 0          | -27.51284999 |
| chr1 | 75344936 | 75344936 | + | 0        | 0          | -37.0665774  |
| chr1 | 75345031 | 75345031 | - | 5.88E-15 | 3.37E-13   | -36.14037899 |
| chr1 | 75360329 | 75360329 | - | 0        | 0          | -31.12370435 |
| chr1 | 75375265 | 75375265 | + | 0        | 0          | -33.73888105 |
| chr1 | 75375266 | 75375266 | - | 1.11E-16 | 7.26E-15   | -25.68141436 |
| chr1 | 75375313 | 75375313 | + | 0        | 0          | -25.616978   |
| chr1 | 75420732 | 75420732 | + | 2.23E-05 | 0.00033907 | -30.98591549 |
| chr1 | 75431389 | 75431389 | + | 0        | 0          | -29.46613745 |
| chr1 | 77512947 | 77512947 | - | 0        | 0          | -25.71200122 |
| chr1 | 78347244 | 78347244 | + | 5.88E-07 | 1.26E-05   | -26.30109566 |
| chr1 | 78347252 | 78347252 | + | 3.40E-07 | 7.63E-06   | -30.86273666 |
| chr1 | 78351988 | 78351988 | + | 7.06E-06 | 0.00012109 | 28.20512821  |
| chr1 | 78454864 | 78454864 | + | 0        | 0          | -29.40377036 |
| chr1 | 78454866 | 78454866 | + | 0        | 0          | -31.50183086 |

|      |          |          |   |            |            |              |
|------|----------|----------|---|------------|------------|--------------|
| chr1 | 79672738 | 79672738 | + | 1.07E-09   | 3.53E-08   | -32.32457367 |
| chr1 | 79672741 | 79672741 | + | 8.07E-13   | 3.76E-11   | -36.12664244 |
| chr1 | 79672759 | 79672759 | + | 2.90E-09   | 8.98E-08   | -29.10865411 |
| chr1 | 80293572 | 80293572 | - | 0          | 0          | -26.10105942 |
| chr1 | 82918165 | 82918165 | + | 3.32E-07   | 7.46E-06   | -26.75284838 |
| chr1 | 82974597 | 82974597 | - | 0          | 0          | -27.19356803 |
| chr1 | 82974611 | 82974611 | - | 0          | 0          | -27.96969327 |
| chr1 | 85221178 | 85221178 | + | 5.82E-10   | 1.98E-08   | -53.76955903 |
| chr1 | 86274719 | 86274719 | - | 5.84E-09   | 1.73E-07   | -26.34918019 |
| chr1 | 86303006 | 86303006 | - | 1.80E-07   | 4.24E-06   | -37.49385749 |
| chr1 | 86303023 | 86303023 | - | 5.09E-05   | 0.00070072 | -29.6037296  |
| chr1 | 86310704 | 86310704 | - | 1.72E-05   | 0.00026797 | -39.42819149 |
| chr1 | 86313763 | 86313763 | + | 0          | 0          | -30.88342247 |
| chr1 | 86313765 | 86313765 | + | 1.11E-16   | 7.26E-15   | -25.49315971 |
| chr1 | 86313768 | 86313768 | + | 0          | 0          | -35.25633238 |
| chr1 | 86313772 | 86313772 | + | 0          | 0          | -27.42767933 |
| chr1 | 86313809 | 86313809 | - | 0          | 0          | -26.2523255  |
| chr1 | 86313957 | 86313957 | + | 4.00E-15   | 2.32E-13   | -32.09099594 |
| chr1 | 86435603 | 86435603 | - | 0          | 0          | -46.05422134 |
| chr1 | 86435628 | 86435628 | - | 3.37E-11   | 1.32E-09   | -31.12645868 |
| chr1 | 86491530 | 86491530 | + | 5.55E-15   | 3.18E-13   | -43.39867638 |
| chr1 | 86674736 | 86674736 | - | 0.00101264 | 0.00892254 | -27.31314254 |
| chr1 | 87157645 | 87157645 | + | 0.00100465 | 0.00886484 | -28.18015825 |
| chr1 | 87521131 | 87521131 | - | 0.00071594 | 0.00670534 | -37.69946809 |
| chr1 | 87541945 | 87541945 | - | 5.21E-08   | 1.34E-06   | -25.60137457 |
| chr1 | 87852738 | 87852738 | + | 0.00034146 | 0.00361174 | -36.87943262 |
| chr1 | 87946614 | 87946614 | - | 0          | 0          | -32.36489159 |
| chr1 | 88241361 | 88241361 | + | 7.76E-05   | 0.00101225 | 32.87220026  |
| chr1 | 88261163 | 88261163 | + | 5.99E-06   | 0.00010449 | 31.03896104  |
| chr1 | 88668636 | 88668636 | + | 0          | 0          | -31.57506564 |
| chr1 | 88668680 | 88668680 | + | 0          | 0          | -36.36348937 |
| chr1 | 88668681 | 88668681 | - | 0          | 0          | -32.83535866 |
| chr1 | 88668743 | 88668743 | + | 1.91E-09   | 6.08E-08   | -36.01979498 |
| chr1 | 89090532 | 89090532 | + | 0          | 0          | -34.00187551 |
| chr1 | 89090533 | 89090533 | - | 1.09E-08   | 3.11E-07   | -30.33599808 |
| chr1 | 89090541 | 89090541 | + | 0          | 0          | -37.00409913 |
| chr1 | 89090549 | 89090549 | + | 0          | 0          | -35.18428626 |
| chr1 | 89090672 | 89090672 | + | 2.86E-07   | 6.50E-06   | -25.54559121 |
| chr1 | 89466787 | 89466787 | + | 0          | 0          | -34.01852628 |
| chr1 | 89466797 | 89466797 | + | 0          | 0          | -34.23172757 |
| chr1 | 89466823 | 89466823 | + | 0          | 0          | -32.87773004 |

|      |          |          |   |            |            |              |
|------|----------|----------|---|------------|------------|--------------|
| chr1 | 89581711 | 89581711 | + | 0          | 0          | -25.95003725 |
| chr1 | 89581712 | 89581712 | - | 0          | 0          | -28.06826434 |
| chr1 | 89581797 | 89581797 | + | 3.33E-16   | 2.11E-14   | -33.93051857 |
| chr1 | 89750927 | 89750927 | + | 0          | 0          | -26.74002459 |
| chr1 | 89750980 | 89750980 | - | 0          | 0          | -29.28600617 |
| chr1 | 89751017 | 89751017 | + | 0          | 0          | -29.21938587 |
| chr1 | 89751019 | 89751019 | + | 0          | 0          | -27.35486687 |
| chr1 | 89751021 | 89751021 | + | 0          | 0          | -28.32599916 |
| chr1 | 89751051 | 89751051 | - | 0          | 0          | -39.19393214 |
| chr1 | 89751063 | 89751063 | - | 0          | 0          | -26.64041995 |
| chr1 | 89751072 | 89751072 | - | 0          | 0          | -26.10983982 |
| chr1 | 89751075 | 89751075 | - | 0          | 0          | -33.48632928 |
| chr1 | 89751083 | 89751083 | - | 3.00E-15   | 1.76E-13   | -25.70108051 |
| chr1 | 89913443 | 89913443 | - | 0.00017779 | 0.00207172 | -43.17647059 |
| chr1 | 89918241 | 89918241 | - | 0          | 0          | -27.23211116 |
| chr1 | 89922081 | 89922081 | - | 0          | 0          | -26.53559057 |
| chr1 | 89928771 | 89928771 | + | 0          | 0          | -36.32486854 |
| chr1 | 89928774 | 89928774 | + | 0          | 0          | -27.33293453 |
| chr1 | 89928805 | 89928805 | + | 0          | 0          | -47.26725786 |
| chr1 | 89928820 | 89928820 | + | 0          | 0          | -26.95744717 |
| chr1 | 89928899 | 89928899 | - | 0          | 0          | -38.9386146  |
| chr1 | 89928916 | 89928916 | - | 0          | 0          | -34.02747775 |
| chr1 | 89928919 | 89928919 | - | 0          | 0          | -37.95530793 |
| chr1 | 89928922 | 89928922 | - | 0          | 0          | -46.50523931 |
| chr1 | 89928924 | 89928924 | + | 0          | 0          | -35.28654538 |
| chr1 | 89928925 | 89928925 | - | 0          | 0          | -39.57986278 |
| chr1 | 89928941 | 89928941 | + | 0          | 0          | -36.43411288 |
| chr1 | 89928961 | 89928961 | + | 0          | 0          | -44.01517171 |
| chr1 | 89928962 | 89928962 | - | 0          | 0          | -40.98601131 |
| chr1 | 89928964 | 89928964 | + | 0          | 0          | -39.48233429 |
| chr1 | 89928965 | 89928965 | - | 0          | 0          | -42.83985044 |
| chr1 | 89928971 | 89928971 | + | 0          | 0          | -27.06437338 |
| chr1 | 89928972 | 89928972 | - | 0          | 0          | -25.77510713 |
| chr1 | 89928989 | 89928989 | - | 0          | 0          | -42.55860107 |
| chr1 | 89931501 | 89931501 | - | 0          | 0          | -28.6636655  |
| chr1 | 89931649 | 89931649 | + | 0          | 0          | -34.08603084 |
| chr1 | 89931683 | 89931683 | - | 0          | 0          | -42.77086821 |
| chr1 | 89931704 | 89931704 | - | 0          | 0          | -53.17003631 |
| chr1 | 89931709 | 89931709 | - | 0          | 0          | -34.35248367 |
| chr1 | 89931721 | 89931721 | - | 0          | 0          | -37.71134208 |
| chr1 | 89931726 | 89931726 | - | 0          | 0          | -46.8014904  |



|      |           |           |   |          |            |              |
|------|-----------|-----------|---|----------|------------|--------------|
| chr1 | 89932158  | 89932158  | + | 2.28E-11 | 9.10E-10   | -47.54545455 |
| chr1 | 89935549  | 89935549  | + | 0        | 0          | -41.28709925 |
| chr1 | 89935562  | 89935562  | + | 0        | 0          | -42.92973532 |
| chr1 | 89935584  | 89935584  | + | 0        | 0          | -44.38844062 |
| chr1 | 89935585  | 89935585  | - | 0        | 0          | -41.43350617 |
| chr1 | 89935597  | 89935597  | + | 0        | 0          | -33.71136979 |
| chr1 | 89935598  | 89935598  | - | 0        | 0          | -34.8853653  |
| chr1 | 89935630  | 89935630  | + | 0        | 0          | -41.76242606 |
| chr1 | 89935724  | 89935724  | - | 0        | 0          | -31.84575543 |
| chr1 | 90202264  | 90202264  | + | 0        | 0          | -25.26793584 |
| chr1 | 90202364  | 90202364  | + | 0        | 0          | -32.84610814 |
| chr1 | 90202382  | 90202382  | + | 0        | 0          | -27.73914483 |
| chr1 | 90202464  | 90202464  | - | 0        | 0          | -32.30430734 |
| chr1 | 90202691  | 90202691  | + | 8.83E-07 | 1.84E-05   | -35.77764636 |
| chr1 | 90927469  | 90927469  | - | 0        | 0          | -25.34570892 |
| chr1 | 90927559  | 90927559  | - | 0        | 0          | -28.17954448 |
| chr1 | 90969679  | 90969679  | - | 2.32E-10 | 8.28E-09   | -25.88932806 |
| chr1 | 91017732  | 91017732  | + | 1.08E-12 | 4.95E-11   | -26.97417124 |
| chr1 | 91017752  | 91017752  | - | 0        | 0          | -29.36268518 |
| chr1 | 91017772  | 91017772  | - | 0        | 0          | -29.5649303  |
| chr1 | 91017783  | 91017783  | - | 0        | 0          | -25.79133746 |
| chr1 | 91017788  | 91017788  | - | 0        | 0          | -28.2707318  |
| chr1 | 91022713  | 91022713  | - | 3.34E-08 | 8.88E-07   | -36.36363636 |
| chr1 | 91022735  | 91022735  | - | 2.32E-05 | 0.00035112 | -28.18181818 |
| chr1 | 91449618  | 91449618  | + | 0        | 0          | -34.92685475 |
| chr1 | 91449619  | 91449619  | - | 0        | 0          | -34.63530639 |
| chr1 | 91449623  | 91449623  | + | 0        | 0          | -35.30723001 |
| chr1 | 91449624  | 91449624  | - | 0        | 0          | -39.14617249 |
| chr1 | 91449639  | 91449639  | - | 0        | 0          | -35.33778129 |
| chr1 | 92976440  | 92976440  | + | 0        | 0          | -30.77568437 |
| chr1 | 93190933  | 93190933  | - | 3.83E-10 | 1.33E-08   | -30.22710623 |
| chr1 | 93211755  | 93211755  | - | 1.00E-09 | 3.30E-08   | -43.44888367 |
| chr1 | 93211793  | 93211793  | + | 0        | 0          | -26.07867732 |
| chr1 | 105880787 | 105880787 | - | 9.13E-09 | 2.63E-07   | -48.31730769 |
| chr1 | 106037278 | 106037278 | + | 1.13E-07 | 2.75E-06   | -28.79945163 |
| chr1 | 106173275 | 106173275 | - | 0        | 0          | -31.54275714 |
| chr1 | 106876112 | 106876112 | + | 2.22E-16 | 1.43E-14   | -25.42511919 |
| chr1 | 108852411 | 108852411 | - | 3.39E-07 | 7.61E-06   | -37.69181991 |
| chr1 | 118097504 | 118097504 | + | 0        | 0          | -30.74759615 |
| chr1 | 118457228 | 118457228 | + | 2.99E-07 | 6.77E-06   | -28.54531002 |
| chr1 | 118457479 | 118457479 | - | 2.64E-06 | 4.99E-05   | -27.86868268 |

|      |           |           |   |            |            |              |
|------|-----------|-----------|---|------------|------------|--------------|
| chr1 | 118969181 | 118969181 | + | 1.33E-15   | 8.06E-14   | -35.24239544 |
| chr1 | 118991170 | 118991170 | - | 0          | 0          | -25.86974332 |
| chr1 | 119035503 | 119035503 | - | 6.59E-07   | 1.40E-05   | -32.0508167  |
| chr1 | 119035538 | 119035538 | - | 0.00011222 | 0.00139229 | -25.47198082 |
| chr1 | 119050408 | 119050408 | + | 0          | 0          | -33.23357153 |
| chr1 | 119065007 | 119065007 | - | 7.29E-08   | 1.83E-06   | -26.01909152 |
| chr1 | 119077269 | 119077269 | + | 0          | 0          | -28.32615074 |
| chr1 | 119077295 | 119077295 | + | 0          | 0          | -29.92018191 |
| chr1 | 119077400 | 119077400 | - | 2.53E-12   | 1.12E-10   | -31.89811787 |
| chr1 | 119305525 | 119305525 | + | 0          | 0          | -25.68263602 |
| chr1 | 120099496 | 120099496 | + | 1.75E-06   | 3.43E-05   | -31.80946292 |
| chr1 | 120176375 | 120176375 | + | 1.17E-08   | 3.33E-07   | -26.71568627 |
| chr1 | 120469149 | 120469149 | - | 4.65E-05   | 0.00064758 | -27.60171744 |
| chr1 | 120964224 | 120964224 | + | 1.03E-09   | 3.40E-08   | -26.89447483 |
| chr1 | 126677310 | 126677310 | + | 0          | 0          | -26.66759674 |
| chr1 | 128440508 | 128440508 | + | 0          | 0          | -34.12329649 |
| chr1 | 128440596 | 128440596 | - | 0          | 0          | -35.09209745 |
| chr1 | 128440599 | 128440599 | - | 0          | 0          | -33.20772097 |
| chr1 | 128440611 | 128440611 | - | 0          | 0          | -27.50996188 |
| chr1 | 128440621 | 128440621 | - | 0          | 0          | -30.54379681 |
| chr1 | 128440634 | 128440634 | + | 8.59E-13   | 3.99E-11   | -29.38004365 |
| chr1 | 128440635 | 128440635 | - | 0          | 0          | -32.32307029 |
| chr1 | 128440742 | 128440742 | + | 0          | 0          | -32.29407486 |
| chr1 | 128440743 | 128440743 | - | 0          | 0          | -39.85416623 |
| chr1 | 128457074 | 128457074 | - | 0          | 0          | -37.12284949 |
| chr1 | 130659862 | 130659862 | - | 5.22E-15   | 3.00E-13   | -30.17424564 |
| chr1 | 130942149 | 130942149 | - | 7.28E-12   | 3.07E-10   | -25.48262548 |
| chr1 | 130947120 | 130947120 | + | 0          | 0          | -30.97221279 |
| chr1 | 131003559 | 131003559 | - | 0          | 0          | -37.75519018 |
| chr1 | 131003568 | 131003568 | - | 0          | 0          | -35.03127142 |
| chr1 | 131003615 | 131003615 | - | 0          | 0          | -26.13198333 |
| chr1 | 131188029 | 131188029 | - | 0          | 0          | -26.59099451 |
| chr1 | 131244665 | 131244665 | + | 0          | 0          | -30.78532077 |
| chr1 | 131244676 | 131244676 | + | 0          | 0          | -27.20834273 |
| chr1 | 131744244 | 131744244 | - | 5.43E-10   | 1.85E-08   | -28.81393035 |
| chr1 | 131748331 | 131748331 | - | 0          | 0          | -25.18766833 |
| chr1 | 132116717 | 132116717 | + | 2.53E-13   | 1.24E-11   | -25.42484944 |
| chr1 | 132116742 | 132116742 | + | 1.36E-13   | 6.81E-12   | -26.67748061 |
| chr1 | 132138101 | 132138101 | - | 0.00021936 | 0.00247951 | -31.27943485 |
| chr1 | 132140446 | 132140446 | + | 0.00082145 | 0.00751208 | -33.58876117 |
| chr1 | 132195468 | 132195468 | + | 8.73E-09   | 2.53E-07   | -25.32358156 |

|      |           |           |   |            |            |              |
|------|-----------|-----------|---|------------|------------|--------------|
| chr1 | 132233908 | 132233908 | - | 0.00011501 | 0.0014218  | -31.06947697 |
| chr1 | 132291419 | 132291419 | - | 2.46E-05   | 0.0003696  | -34.11764706 |
| chr1 | 132292800 | 132292800 | + | 1.31E-10   | 4.81E-09   | -32.88825512 |
| chr1 | 132323008 | 132323008 | - | 0          | 0          | -26.30455041 |
| chr1 | 132338072 | 132338072 | + | 0          | 0          | -27.55488549 |
| chr1 | 132390009 | 132390009 | - | 0          | 0          | -25.89794757 |
| chr1 | 132921048 | 132921048 | - | 0.00074291 | 0.00691276 | 31.81818182  |
| chr1 | 133071785 | 133071785 | + | 2.77E-12   | 1.22E-10   | -25.83887068 |
| chr1 | 133076930 | 133076930 | + | 3.82E-11   | 1.49E-09   | -29.41414834 |
| chr1 | 133077137 | 133077137 | - | 5.45E-11   | 2.09E-09   | -48.20384294 |
| chr1 | 133077163 | 133077163 | - | 2.28E-06   | 4.36E-05   | -37.15956558 |
| chr1 | 133101106 | 133101106 | - | 0          | 0          | -40.60647213 |
| chr1 | 133168578 | 133168578 | - | 0          | 0          | -25.05044908 |
| chr1 | 133222892 | 133222892 | + | 0          | 0          | -38.88888889 |
| chr1 | 133222893 | 133222893 | - | 0          | 0          | -32.04153646 |
| chr1 | 133226196 | 133226196 | + | 0          | 0          | -33.38367566 |
| chr1 | 133226219 | 133226219 | + | 0          | 0          | -41.84029614 |
| chr1 | 133298819 | 133298819 | - | 0          | 0          | -25.86264503 |
| chr1 | 133412977 | 133412977 | + | 1.19E-08   | 3.38E-07   | -25.65960016 |
| chr1 | 133438095 | 133438095 | + | 0          | 0          | -26.81295587 |
| chr1 | 133438131 | 133438131 | + | 0          | 0          | -25.5018483  |
| chr1 | 133438176 | 133438176 | - | 0          | 0          | -27.40625    |
| chr1 | 133763401 | 133763401 | + | 0          | 0          | -26.16437401 |
| chr1 | 133763402 | 133763402 | - | 0          | 0          | -25.38958543 |
| chr1 | 133886826 | 133886826 | + | 7.77E-16   | 4.79E-14   | -25.61369549 |
| chr1 | 133890078 | 133890078 | + | 0          | 0          | -41.32876177 |
| chr1 | 133890108 | 133890108 | - | 0          | 0          | -52.2502267  |
| chr1 | 133890114 | 133890114 | - | 0          | 0          | -48.42709662 |
| chr1 | 133890135 | 133890135 | - | 0          | 0          | -29.15158871 |
| chr1 | 133890150 | 133890150 | + | 0          | 0          | -36.48715212 |
| chr1 | 133890151 | 133890151 | - | 1.11E-16   | 7.26E-15   | -31.10410013 |
| chr1 | 133890193 | 133890193 | - | 0          | 0          | -35.21011981 |
| chr1 | 133890675 | 133890675 | + | 0          | 0          | -34.17645192 |
| chr1 | 133890709 | 133890709 | + | 0          | 0          | -42.60232521 |
| chr1 | 133917800 | 133917800 | + | 1.05E-14   | 5.88E-13   | -32.20325804 |
| chr1 | 133961904 | 133961904 | + | 0          | 0          | -28.69023591 |
| chr1 | 134046634 | 134046634 | - | 0          | 0          | -25.97782369 |
| chr1 | 134046666 | 134046666 | + | 3.15E-06   | 5.85E-05   | -29.54627949 |
| chr1 | 134046667 | 134046667 | - | 1.42E-05   | 0.00022691 | -25.77605322 |
| chr1 | 134083124 | 134083124 | - | 0          | 0          | -25.9080012  |
| chr1 | 134233632 | 134233632 | + | 0.00050411 | 0.00500844 | -27.04686618 |

|      |           |           |   |            |            |              |
|------|-----------|-----------|---|------------|------------|--------------|
| chr1 | 134292394 | 134292394 | - | 1.67E-05   | 0.0002613  | -29.88748242 |
| chr1 | 134421758 | 134421758 | + | 0          | 0          | -25.26637332 |
| chr1 | 134421759 | 134421759 | - | 1.62E-12   | 7.32E-11   | -30.19834475 |
| chr1 | 134709637 | 134709637 | - | 0          | 0          | -33.767507   |
| chr1 | 135084930 | 135084930 | - | 2.01E-07   | 4.70E-06   | -37.11711712 |
| chr1 | 135085391 | 135085391 | - | 0.00017491 | 0.00204325 | -28.9071882  |
| chr1 | 135110594 | 135110594 | + | 2.83E-14   | 1.52E-12   | -25.82378348 |
| chr1 | 135110739 | 135110739 | - | 1.04E-07   | 2.55E-06   | -26.6198854  |
| chr1 | 135136111 | 135136111 | - | 1.31E-10   | 4.79E-09   | -51.50713908 |
| chr1 | 135154287 | 135154287 | + | 1.11E-16   | 7.26E-15   | -26.11836982 |
| chr1 | 135154345 | 135154345 | - | 0          | 0          | -31.43401509 |
| chr1 | 135248513 | 135248513 | + | 0          | 0          | -26.21826259 |
| chr1 | 135584032 | 135584032 | + | 2.02E-08   | 5.54E-07   | -30.38630028 |
| chr1 | 135584843 | 135584843 | + | 0          | 0          | -44.6274825  |
| chr1 | 135584844 | 135584844 | - | 0          | 0          | -39.04246262 |
| chr1 | 135584847 | 135584847 | - | 0          | 0          | -37.64832259 |
| chr1 | 135584849 | 135584849 | + | 1.11E-16   | 7.26E-15   | -44.69320066 |
| chr1 | 135584850 | 135584850 | - | 0          | 0          | -35.83829852 |
| chr1 | 135584877 | 135584877 | + | 3.24E-14   | 1.73E-12   | -33.13519814 |
| chr1 | 135584898 | 135584898 | + | 0          | 0          | -52.8473245  |
| chr1 | 135585043 | 135585043 | - | 1.13E-13   | 5.72E-12   | -43.21378718 |
| chr1 | 135585056 | 135585056 | - | 7.77E-07   | 1.63E-05   | -29.63265751 |
| chr1 | 135585126 | 135585126 | + | 2.12E-08   | 5.80E-07   | -25.78828829 |
| chr1 | 135616091 | 135616091 | - | 0.00031911 | 0.00341127 | -34.31372549 |
| chr1 | 135673590 | 135673590 | + | 0          | 0          | -26.03599963 |
| chr1 | 135691532 | 135691532 | - | 3.71E-05   | 0.00053082 | -27.87387387 |
| chr1 | 135691559 | 135691559 | - | 2.16E-06   | 4.16E-05   | -37.33333333 |
| chr1 | 135699019 | 135699019 | + | 0          | 0          | -49.2331049  |
| chr1 | 135699032 | 135699032 | + | 0          | 0          | -38.92548799 |
| chr1 | 135699038 | 135699038 | + | 0          | 0          | -52.3368663  |
| chr1 | 135699066 | 135699066 | + | 0          | 0          | -43.29901257 |
| chr1 | 135699092 | 135699092 | - | 0          | 0          | -40.93031426 |
| chr1 | 135699104 | 135699104 | - | 0          | 0          | -28.64294386 |
| chr1 | 135699113 | 135699113 | - | 0          | 0          | -38.57123775 |
| chr1 | 135699125 | 135699125 | - | 0          | 0          | -31.16489115 |
| chr1 | 135735466 | 135735466 | + | 1.11E-16   | 7.26E-15   | -28.29088642 |
| chr1 | 135851715 | 135851715 | - | 1.76E-10   | 6.37E-09   | -26.05880513 |
| chr1 | 136133185 | 136133185 | + | 1.11E-16   | 7.26E-15   | -26.04077863 |
| chr1 | 136133725 | 136133725 | + | 3.08E-09   | 9.52E-08   | -26.85877991 |
| chr1 | 136133726 | 136133726 | - | 2.08E-09   | 6.57E-08   | -33.40540541 |
| chr1 | 136133747 | 136133747 | - | 2.44E-09   | 7.64E-08   | -35.67567568 |

|      |           |           |   |            |            |              |
|------|-----------|-----------|---|------------|------------|--------------|
| chr1 | 136230388 | 136230388 | + | 0          | 0          | -36.70322624 |
| chr1 | 136230470 | 136230470 | - | 0          | 0          | -42.61245968 |
| chr1 | 136230486 | 136230486 | + | 0          | 0          | -50.25824556 |
| chr1 | 136231839 | 136231839 | + | 0          | 0          | -29.24401382 |
| chr1 | 136232283 | 136232283 | + | 8.60E-07   | 1.79E-05   | -26.45976182 |
| chr1 | 136232428 | 136232428 | - | 2.22E-16   | 1.43E-14   | -27.24559883 |
| chr1 | 136570401 | 136570401 | - | 0          | 0          | -28.01842179 |
| chr1 | 136695273 | 136695273 | + | 5.04E-08   | 1.30E-06   | -45.27950311 |
| chr1 | 136695300 | 136695300 | + | 1.12E-06   | 2.29E-05   | -40.86580087 |
| chr1 | 136696294 | 136696294 | + | 0          | 0          | -36.22041597 |
| chr1 | 136696321 | 136696321 | + | 0          | 0          | -38.70786428 |
| chr1 | 136696326 | 136696326 | + | 0          | 0          | -37.33756604 |
| chr1 | 136696327 | 136696327 | - | 1.11E-16   | 7.26E-15   | -29.76874608 |
| chr1 | 136696351 | 136696351 | - | 0          | 0          | -38.52740715 |
| chr1 | 136696360 | 136696360 | - | 1.03E-14   | 5.76E-13   | -25.72867938 |
| chr1 | 136733489 | 136733489 | - | 7.05E-05   | 0.00093093 | -32.25806452 |
| chr1 | 138617531 | 138617531 | - | 3.22E-08   | 8.58E-07   | -26.73919706 |
| chr1 | 142369645 | 142369645 | + | 0.00020792 | 0.0023688  | 26.66666667  |
| chr1 | 149954175 | 149954175 | + | 1.75E-07   | 4.14E-06   | -30.91355819 |
| chr1 | 151087339 | 151087339 | + | 9.89E-07   | 2.04E-05   | -27.73109244 |
| chr1 | 151087532 | 151087532 | - | 1.02E-09   | 3.37E-08   | -35.54778555 |
| chr1 | 151250918 | 151250918 | - | 5.19E-08   | 1.34E-06   | -25.2188047  |
| chr1 | 151571056 | 151571056 | + | 5.04E-08   | 1.30E-06   | -33.75841584 |
| chr1 | 151686763 | 151686763 | - | 8.86E-11   | 3.32E-09   | -25.55449012 |
| chr1 | 152047556 | 152047556 | + | 4.10E-12   | 1.78E-10   | -31.8657299  |
| chr1 | 152241888 | 152241888 | + | 0.00033383 | 0.00354353 | -28.00189843 |
| chr1 | 152426123 | 152426123 | + | 0.00099681 | 0.00880808 | -28.04621849 |
| chr1 | 152677014 | 152677014 | + | 2.26E-09   | 7.11E-08   | -34.32098765 |
| chr1 | 153048133 | 153048133 | - | 0          | 0          | -27.125044   |
| chr1 | 153048146 | 153048146 | + | 0          | 0          | -27.50523909 |
| chr1 | 153048289 | 153048289 | - | 0          | 0          | -31.66768812 |
| chr1 | 153191649 | 153191649 | - | 2.41E-05   | 0.00036282 | -25.32144944 |
| chr1 | 153346103 | 153346103 | - | 7.99E-10   | 2.67E-08   | -28.84411453 |
| chr1 | 153642216 | 153642216 | + | 2.11E-15   | 1.25E-13   | -30.41568319 |
| chr1 | 153642223 | 153642223 | + | 1.21E-11   | 4.97E-10   | -25.18755638 |
| chr1 | 153964157 | 153964157 | - | 0          | 0          | -45.60273096 |
| chr1 | 155086692 | 155086692 | + | 0          | 0          | -26.18385842 |
| chr1 | 155086693 | 155086693 | - | 0          | 0          | -25.96946606 |
| chr1 | 155480212 | 155480212 | - | 0.00043733 | 0.00444437 | -34.61538462 |
| chr1 | 155530852 | 155530852 | - | 5.24E-06   | 9.25E-05   | -30.12987013 |
| chr1 | 155784838 | 155784838 | - | 0          | 0          | -27.98835692 |

|      |           |           |   |            |            |              |
|------|-----------|-----------|---|------------|------------|--------------|
| chr1 | 156304205 | 156304205 | - | 3.22E-15   | 1.89E-13   | -32.28137996 |
| chr1 | 156310801 | 156310801 | + | 0          | 0          | -29.96611871 |
| chr1 | 156310803 | 156310803 | + | 0          | 0          | -32.15420207 |
| chr1 | 156378325 | 156378325 | + | 7.79E-06   | 0.00013224 | -33.33333333 |
| chr1 | 157415906 | 157415906 | + | 1.48E-05   | 0.00023548 | -31.15441022 |
| chr1 | 157415960 | 157415960 | - | 0          | 0          | -33.58713972 |
| chr1 | 157450853 | 157450853 | + | 5.70E-10   | 1.94E-08   | -26.3645483  |
| chr1 | 157450886 | 157450886 | - | 9.99E-16   | 6.10E-14   | -33.49275362 |
| chr1 | 159816853 | 159816853 | - | 0.00079932 | 0.00734456 | -27.71892655 |
| chr1 | 160793387 | 160793387 | - | 0          | 0          | -30.15982988 |
| chr1 | 161142978 | 161142978 | - | 0          | 0          | -26.80479879 |
| chr1 | 161142994 | 161142994 | - | 0          | 0          | -36.14287283 |
| chr1 | 161143056 | 161143056 | - | 0          | 0          | -25.77030812 |
| chr1 | 162004467 | 162004467 | + | 0.00011583 | 0.00143063 | -25.91149735 |
| chr1 | 162076961 | 162076961 | + | 0          | 0          | -34.94983278 |
| chr1 | 162412415 | 162412415 | - | 2.22E-16   | 1.43E-14   | -29.74600457 |
| chr1 | 164136792 | 164136792 | + | 0.00114645 | 0.00986966 | -28.96825397 |
| chr1 | 164144749 | 164144749 | - | 8.17E-12   | 3.43E-10   | -33.37077337 |
| chr1 | 165091745 | 165091745 | - | 7.68E-09   | 2.24E-07   | -38.06613947 |
| chr1 | 165153366 | 165153366 | + | 3.29E-05   | 0.00047702 | -36.24127617 |
| chr1 | 165153367 | 165153367 | - | 0          | 0          | -28.26073357 |
| chr1 | 165617025 | 165617025 | + | 3.17E-08   | 8.46E-07   | -26.81928777 |
| chr1 | 165617037 | 165617037 | + | 8.22E-06   | 0.0001387  | -26.85584689 |
| chr1 | 165617213 | 165617213 | + | 0          | 0          | -25.77235772 |
| chr1 | 165617214 | 165617214 | - | 8.35E-06   | 0.00014081 | -26.15646259 |
| chr1 | 165663408 | 165663408 | + | 0          | 0          | -27.97211755 |
| chr1 | 165701665 | 165701665 | - | 3.36E-09   | 1.03E-07   | -50.43067519 |
| chr1 | 165725208 | 165725208 | + | 6.41E-11   | 2.44E-09   | -26.18657291 |
| chr1 | 165771469 | 165771469 | + | 6.68E-08   | 1.69E-06   | -29.75520476 |
| chr1 | 166068916 | 166068916 | + | 7.79E-05   | 0.00101559 | -37.22349352 |
| chr1 | 166365659 | 166365659 | + | 7.25E-05   | 0.00095351 | -31.91489362 |
| chr1 | 167269382 | 167269382 | - | 2.58E-09   | 8.05E-08   | -34.1089154  |
| chr1 | 167283163 | 167283163 | + | 0          | 0          | -27.55705694 |
| chr1 | 167545448 | 167545448 | - | 9.16E-12   | 3.82E-10   | -28.0129717  |
| chr1 | 168215015 | 168215015 | - | 0          | 0          | -27.03524417 |
| chr1 | 168232518 | 168232518 | + | 2.46E-10   | 8.73E-09   | -27.33359764 |
| chr1 | 168382998 | 168382998 | - | 1.32E-06   | 2.65E-05   | -29.90510949 |
| chr1 | 168416240 | 168416240 | + | 1.38E-07   | 3.33E-06   | -26.67378917 |
| chr1 | 170820234 | 170820234 | + | 1.16E-07   | 2.82E-06   | -26.08118657 |
| chr1 | 171064607 | 171064607 | + | 1.99E-06   | 3.86E-05   | -47.07602339 |
| chr1 | 171115974 | 171115974 | + | 7.35E-05   | 0.00096493 | -27.90697674 |

|      |           |           |   |            |            |              |
|------|-----------|-----------|---|------------|------------|--------------|
| chr1 | 171160027 | 171160027 | - | 0          | 0          | -28.53793691 |
| chr1 | 171160052 | 171160052 | - | 0          | 0          | -34.22925636 |
| chr1 | 171193136 | 171193136 | + | 0          | 0          | -28.54743403 |
| chr1 | 171193137 | 171193137 | - | 0          | 0          | -29.61265156 |
| chr1 | 171193249 | 171193249 | + | 0          | 0          | -42.05079558 |
| chr1 | 171193250 | 171193250 | - | 0          | 0          | -45.17236739 |
| chr1 | 171193313 | 171193313 | - | 0          | 0          | -33.40061676 |
| chr1 | 171230915 | 171230915 | - | 5.31E-08   | 1.37E-06   | -36.54054054 |
| chr1 | 171250980 | 171250980 | - | 0          | 0          | -30.70158443 |
| chr1 | 171250987 | 171250987 | - | 0          | 0          | -27.71746781 |
| chr1 | 171251243 | 171251243 | + | 0          | 0          | -27.61542738 |
| chr1 | 171251244 | 171251244 | - | 3.52E-06   | 6.47E-05   | -35.89285714 |
| chr1 | 171251271 | 171251271 | + | 0          | 0          | -34.40636632 |
| chr1 | 171251341 | 171251341 | - | 0          | 0          | -37.05041644 |
| chr1 | 171271346 | 171271346 | - | 4.73E-05   | 0.0006568  | -29.25707429 |
| chr1 | 171271351 | 171271351 | - | 7.66E-06   | 0.00013022 | -30.22655008 |
| chr1 | 171280382 | 171280382 | - | 2.03E-06   | 3.93E-05   | -26.49425287 |
| chr1 | 171370561 | 171370561 | - | 1.20E-08   | 3.41E-07   | -31.47605083 |
| chr1 | 171370608 | 171370608 | - | 1.14E-06   | 2.33E-05   | -28.32285586 |
| chr1 | 171380414 | 171380414 | - | 0          | 0          | -25.55622879 |
| chr1 | 172001936 | 172001936 | - | 0          | 0          | -25.10745109 |
| chr1 | 172244206 | 172244206 | + | 0          | 0          | -33.19385957 |
| chr1 | 172244227 | 172244227 | + | 0          | 0          | -36.00366525 |
| chr1 | 172244377 | 172244377 | - | 3.28E-09   | 1.01E-07   | -34.36656334 |
| chr1 | 172244382 | 172244382 | - | 3.51E-10   | 1.22E-08   | -36.47058824 |
| chr1 | 172245133 | 172245133 | + | 0          | 0          | -27.48300918 |
| chr1 | 172245134 | 172245134 | - | 3.66E-15   | 2.14E-13   | -25.33648022 |
| chr1 | 172392396 | 172392396 | + | 0          | 0          | -29.74296976 |
| chr1 | 172392418 | 172392418 | + | 0          | 0          | -25.63605402 |
| chr1 | 172392421 | 172392421 | + | 0          | 0          | -27.7304533  |
| chr1 | 172392480 | 172392480 | - | 0          | 0          | -26.56550122 |
| chr1 | 172532410 | 172532410 | + | 0          | 0          | -37.22743353 |
| chr1 | 172532415 | 172532415 | + | 0          | 0          | -44.80911336 |
| chr1 | 172532416 | 172532416 | - | 0          | 0          | -44.79348014 |
| chr1 | 172532464 | 172532464 | + | 0          | 0          | -41.11034931 |
| chr1 | 172532471 | 172532471 | + | 0          | 0          | -29.40545704 |
| chr1 | 172532472 | 172532472 | - | 0          | 0          | -26.70583364 |
| chr1 | 172532490 | 172532490 | + | 0          | 0          | -28.63154951 |
| chr1 | 172561080 | 172561080 | + | 0          | 0          | -41.17411115 |
| chr1 | 172561240 | 172561240 | - | 0          | 0          | -31.21604393 |
| chr1 | 172587098 | 172587098 | + | 0.00063885 | 0.00610269 | -25.20222447 |

|      |           |           |   |            |            |              |
|------|-----------|-----------|---|------------|------------|--------------|
| chr1 | 172592498 | 172592498 | - | 0          | 0          | -39.1797522  |
| chr1 | 173368020 | 173368020 | + | 0.00038201 | 0.00396919 | -32.43781095 |
| chr1 | 177012008 | 177012008 | - | 0          | 0          | -28.8278526  |
| chr1 | 177012048 | 177012048 | - | 0          | 0          | -32.30567315 |
| chr1 | 177323228 | 177323228 | - | 1.82E-06   | 3.56E-05   | -28.90559733 |
| chr1 | 177512273 | 177512273 | + | 1.23E-05   | 0.00019847 | -41.17647059 |
| chr1 | 177640656 | 177640656 | + | 1.14E-07   | 2.78E-06   | -29.64559387 |
| chr1 | 180302123 | 180302123 | - | 0          | 0          | -30.72269484 |
| chr1 | 180312405 | 180312405 | + | 3.62E-06   | 6.63E-05   | -30.26315789 |
| chr1 | 180312432 | 180312432 | - | 0.00012967 | 0.00157813 | -30.09169214 |
| chr1 | 180332533 | 180332533 | + | 0          | 0          | -35.67919799 |
| chr1 | 180332534 | 180332534 | - | 1.90E-14   | 1.03E-12   | -27.45478036 |
| chr1 | 180357111 | 180357111 | + | 1.16E-08   | 3.31E-07   | -35.69549971 |
| chr1 | 180357243 | 180357243 | - | 6.17E-13   | 2.91E-11   | -29.44430475 |
| chr1 | 180433193 | 180433193 | + | 3.39E-09   | 1.04E-07   | -35.81529582 |
| chr1 | 180433195 | 180433195 | + | 3.85E-06   | 7.00E-05   | -26.12121212 |
| chr1 | 180433214 | 180433214 | + | 9.36E-06   | 0.00015594 | -31.1976912  |
| chr1 | 180433216 | 180433216 | + | 3.55E-07   | 7.94E-06   | -32.83492823 |
| chr1 | 180465075 | 180465075 | + | 0.00043193 | 0.00439839 | 27.4122807   |
| chr1 | 180697245 | 180697245 | + | 8.97E-08   | 2.22E-06   | -31.70869789 |
| chr1 | 180697253 | 180697253 | + | 2.65E-08   | 7.16E-07   | -31.49253731 |
| chr1 | 180697254 | 180697254 | - | 0          | 0          | -27.45382824 |
| chr1 | 180771488 | 180771488 | - | 0          | 0          | -26.39594647 |
| chr1 | 180935357 | 180935357 | - | 3.58E-12   | 1.56E-10   | -36.51960784 |
| chr1 | 181376409 | 181376409 | - | 0          | 0          | -28.4784498  |
| chr1 | 181449981 | 181449981 | + | 6.03E-11   | 2.30E-09   | -47.82324059 |
| chr1 | 181845762 | 181845762 | + | 0.00078396 | 0.00722816 | -33.34717608 |
| chr1 | 182088002 | 182088002 | + | 6.25E-06   | 0.00010852 | -31.49920255 |
| chr1 | 182102352 | 182102352 | - | 1.86E-08   | 5.14E-07   | -25.24667932 |
| chr1 | 182365015 | 182365015 | + | 2.51E-05   | 0.00037609 | 42.30769231  |
| chr1 | 182501419 | 182501419 | - | 0          | 0          | -27.10974742 |
| chr1 | 182585267 | 182585267 | + | 0          | 0          | -33.80212953 |
| chr1 | 182671634 | 182671634 | + | 0          | 0          | -26.99323117 |
| chr1 | 182765267 | 182765267 | + | 0          | 0          | -26.91332577 |
| chr1 | 182765371 | 182765371 | - | 0          | 0          | -31.73631276 |
| chr1 | 182819188 | 182819188 | + | 0          | 0          | -26.78660099 |
| chr1 | 183082003 | 183082003 | + | 0          | 0          | -40.22828784 |
| chr1 | 183082004 | 183082004 | - | 1.52E-08   | 4.26E-07   | -29.43262411 |
| chr1 | 183082044 | 183082044 | + | 0          | 0          | -34.36728395 |
| chr1 | 183322748 | 183322748 | + | 1.83E-08   | 5.06E-07   | -25.85949178 |
| chr1 | 183439001 | 183439001 | + | 1.83E-07   | 4.31E-06   | -41.11111111 |



|      |           |           |   |          |          |              |
|------|-----------|-----------|---|----------|----------|--------------|
| chr1 | 184279497 | 184279497 | + | 0        | 0        | -37.65914352 |
| chr1 | 184279512 | 184279512 | + | 0        | 0        | -42.72727273 |
| chr1 | 184279581 | 184279581 | - | 0        | 0        | -35.34151034 |
| chr1 | 184615567 | 184615567 | - | 1.98E-06 | 3.84E-05 | -32.25490196 |
| chr1 | 184664235 | 184664235 | - | 1.32E-14 | 7.30E-13 | -27.35326087 |
| chr1 | 184724802 | 184724802 | + | 2.03E-14 | 1.10E-12 | -25.9556445  |
| chr1 | 184724880 | 184724880 | - | 0        | 0        | -37.17535985 |
| chr1 | 184724899 | 184724899 | - | 0        | 0        | -34.33530947 |
| chr1 | 184727543 | 184727543 | - | 0        | 0        | -25.43203554 |
| chr1 | 184727892 | 184727892 | + | 0        | 0        | -41.60599436 |
| chr1 | 184727904 | 184727904 | + | 0        | 0        | -40.42218384 |
| chr1 | 184727908 | 184727908 | + | 0        | 0        | -34.93252021 |
| chr1 | 184727932 | 184727932 | + | 0        | 0        | -38.78890562 |
| chr1 | 184727933 | 184727933 | - | 0        | 0        | -36.36763136 |
| chr1 | 184727938 | 184727938 | + | 0        | 0        | -37.45967468 |
| chr1 | 184727939 | 184727939 | - | 0        | 0        | -36.79159105 |
| chr1 | 184727955 | 184727955 | - | 0        | 0        | -32.66448334 |
| chr1 | 184727969 | 184727969 | + | 0        | 0        | -30.74747389 |
| chr1 | 184727970 | 184727970 | - | 0        | 0        | -37.34313088 |
| chr1 | 184727997 | 184727997 | + | 0        | 0        | -25.61791115 |
| chr1 | 184727998 | 184727998 | - | 0        | 0        | -26.61955241 |
| chr1 | 184728040 | 184728040 | - | 0        | 0        | -30.68607482 |
| chr1 | 184730850 | 184730850 | + | 6.48E-11 | 2.46E-09 | -37.16899374 |
| chr1 | 184730860 | 184730860 | + | 0        | 0        | -45.39639465 |
| chr1 | 184730893 | 184730893 | + | 1.78E-09 | 5.67E-08 | -33.07333824 |
| chr1 | 184730991 | 184730991 | - | 0        | 0        | -34.20937171 |
| chr1 | 184731037 | 184731037 | + | 0        | 0        | -48.28520994 |
| chr1 | 184731038 | 184731038 | - | 0        | 0        | -43.95743266 |
| chr1 | 184731183 | 184731183 | - | 3.54E-08 | 9.36E-07 | -28.66265414 |
| chr1 | 184733994 | 184733994 | + | 0        | 0        | -26.86860678 |
| chr1 | 184748729 | 184748729 | + | 0        | 0        | -30.27128259 |
| chr1 | 184748741 | 184748741 | + | 0        | 0        | -28.68573479 |
| chr1 | 184748806 | 184748806 | - | 1.18E-13 | 5.98E-12 | -35.41999666 |
| chr1 | 184748867 | 184748867 | + | 1.11E-16 | 7.26E-15 | -25.14071295 |
| chr1 | 184748871 | 184748871 | + | 0        | 0        | -27.77654614 |
| chr1 | 184749010 | 184749010 | - | 2.22E-16 | 1.43E-14 | -29.11649499 |
| chr1 | 184827466 | 184827466 | - | 4.88E-10 | 1.68E-08 | -40.71637427 |
| chr1 | 184864519 | 184864519 | + | 2.39E-06 | 4.55E-05 | -29.23143351 |
| chr1 | 184864531 | 184864531 | + | 2.92E-11 | 1.15E-09 | -48.37306263 |
| chr1 | 184864532 | 184864532 | - | 0        | 0        | -34.66981132 |
| chr1 | 184864552 | 184864552 | - | 0        | 0        | -40.88269454 |

|       |           |           |   |            |            |              |
|-------|-----------|-----------|---|------------|------------|--------------|
| chr1  | 186285117 | 186285117 | - | 0.00035023 | 0.00368934 | 38.72282609  |
| chr1  | 186652611 | 186652611 | - | 5.33E-15   | 3.06E-13   | -27.04127143 |
| chr1  | 187651203 | 187651203 | + | 0          | 0          | -25.9238495  |
| chr1  | 187651239 | 187651239 | - | 0          | 0          | -27.88805459 |
| chr1  | 189946233 | 189946233 | - | 2.01E-06   | 3.88E-05   | -27.70400773 |
| chr1  | 190009915 | 190009915 | - | 4.16E-05   | 0.00058679 | -34.27419355 |
| chr1  | 191277284 | 191277284 | - | 5.08E-09   | 1.52E-07   | -36.60082547 |
| chr1  | 191277325 | 191277325 | - | 2.79E-06   | 5.24E-05   | -27.808418   |
| chr1  | 191446042 | 191446042 | + | 0          | 0          | -27.81392557 |
| chr1  | 191476256 | 191476256 | - | 0          | 0          | -40.46494324 |
| chr1  | 191476267 | 191476267 | - | 0          | 0          | -32.13076    |
| chr1  | 191476302 | 191476302 | - | 1.44E-15   | 8.70E-14   | -29.91931584 |
| chr1  | 192522611 | 192522611 | + | 3.11E-06   | 5.78E-05   | 40.74074074  |
| chr1  | 192799485 | 192799485 | + | 0          | 0          | -33.58503993 |
| chr1  | 192799486 | 192799486 | - | 0          | 0          | -36.73241088 |
| chr1  | 192833865 | 192833865 | - | 7.80E-06   | 0.00013234 | -50.92592593 |
| chr1  | 192834310 | 192834310 | + | 0          | 0          | -31.75594602 |
| chr1  | 192834311 | 192834311 | - | 0          | 0          | -25.74333397 |
| chr1  | 192834339 | 192834339 | + | 0          | 0          | -25.49358801 |
| chr1  | 193272972 | 193272972 | + | 0          | 0          | -33.57544681 |
| chr10 | 4249395   | 4249395   | - | 0          | 0          | -28.2985524  |
| chr10 | 4255107   | 4255107   | - | 8.17E-14   | 4.20E-12   | -25.47374961 |
| chr10 | 4265727   | 4265727   | + | 0          | 0          | -28.07913894 |
| chr10 | 4265740   | 4265740   | + | 0          | 0          | -28.63906926 |
| chr10 | 4265743   | 4265743   | + | 0          | 0          | -25.67595459 |
| chr10 | 4265863   | 4265863   | - | 0          | 0          | -36.82969512 |
| chr10 | 4265913   | 4265913   | - | 0          | 0          | -34.76183136 |
| chr10 | 4430437   | 4430437   | + | 7.32E-06   | 0.00012499 | -26.2254902  |
| chr10 | 4712163   | 4712163   | + | 0          | 0          | -29.23030848 |
| chr10 | 4712173   | 4712173   | + | 0          | 0          | -30.70950788 |
| chr10 | 7158799   | 7158799   | + | 0          | 0          | -29.46845355 |
| chr10 | 7269326   | 7269326   | + | 0          | 0          | -26.25781274 |
| chr10 | 7393684   | 7393684   | + | 0          | 0          | -30.1320092  |
| chr10 | 7850827   | 7850827   | + | 1.31E-06   | 2.62E-05   | -31.03448276 |
| chr10 | 7867678   | 7867678   | + | 8.24E-05   | 0.00106596 | -30.74698795 |
| chr10 | 7867687   | 7867687   | + | 4.28E-06   | 7.71E-05   | -34.47467167 |
| chr10 | 7883376   | 7883376   | - | 1.35E-05   | 0.00021693 | 26.61290323  |
| chr10 | 12614665  | 12614665  | + | 4.37E-11   | 1.70E-09   | -35.59263121 |
| chr10 | 12615014  | 12615014  | - | 0          | 0          | -35.57966321 |
| chr10 | 12615020  | 12615020  | - | 1.11E-16   | 7.26E-15   | -30.95226772 |
| chr10 | 12615057  | 12615057  | - | 0          | 0          | -37.83678756 |

|       |          |          |   |          |            |              |
|-------|----------|----------|---|----------|------------|--------------|
| chr10 | 12823411 | 12823411 | - | 2.32E-10 | 8.28E-09   | -44.34468524 |
| chr10 | 13060882 | 13060882 | + | 0        | 0          | -33.73185287 |
| chr10 | 13061019 | 13061019 | - | 0        | 0          | -45.06308685 |
| chr10 | 13061022 | 13061022 | - | 0        | 0          | -49.44265377 |
| chr10 | 13061033 | 13061033 | - | 0        | 0          | -51.01318119 |
| chr10 | 13061039 | 13061039 | - | 0        | 0          | -55.45877889 |
| chr10 | 13061051 | 13061051 | - | 3.87E-12 | 1.68E-10   | -30.99177152 |
| chr10 | 13061065 | 13061065 | - | 0        | 0          | -44.12774725 |
| chr10 | 13061067 | 13061067 | + | 0        | 0          | -27.54357659 |
| chr10 | 13061068 | 13061068 | - | 1.75E-12 | 7.88E-11   | -33.37912088 |
| chr10 | 13061072 | 13061072 | + | 0        | 0          | -45.39735627 |
| chr10 | 13061083 | 13061083 | + | 0        | 0          | -50.24031225 |
| chr10 | 13061088 | 13061088 | + | 0        | 0          | -38.41836735 |
| chr10 | 13061090 | 13061090 | + | 0        | 0          | -40.89947791 |
| chr10 | 13061092 | 13061092 | + | 0        | 0          | -43.17822096 |
| chr10 | 13061110 | 13061110 | + | 0        | 0          | -44.29548946 |
| chr10 | 13061111 | 13061111 | - | 0        | 0          | -41.82692308 |
| chr10 | 13061112 | 13061112 | + | 0        | 0          | -44.18016194 |
| chr10 | 13061113 | 13061113 | - | 0        | 0          | -44.25866199 |
| chr10 | 13061114 | 13061114 | + | 0        | 0          | -47.6548066  |
| chr10 | 13061115 | 13061115 | - | 0        | 0          | -39.03747405 |
| chr10 | 13061116 | 13061116 | + | 5.44E-15 | 3.12E-13   | -38.29231198 |
| chr10 | 13061117 | 13061117 | - | 0        | 0          | -31.94466246 |
| chr10 | 13061124 | 13061124 | - | 0        | 0          | -39.65953239 |
| chr10 | 13061127 | 13061127 | - | 0        | 0          | -37.45934959 |
| chr10 | 13061161 | 13061161 | - | 0        | 0          | -28.38072307 |
| chr10 | 13061171 | 13061171 | + | 0        | 0          | -41.50683639 |
| chr10 | 13061172 | 13061172 | - | 0        | 0          | -40.10162832 |
| chr10 | 13061173 | 13061173 | + | 0        | 0          | -25.82038012 |
| chr10 | 13061174 | 13061174 | - | 0        | 0          | -26.65681213 |
| chr10 | 13061183 | 13061183 | + | 0        | 0          | -38.20510609 |
| chr10 | 13061184 | 13061184 | - | 0        | 0          | -41.74640495 |
| chr10 | 13061192 | 13061192 | + | 0        | 0          | -25.94546067 |
| chr10 | 13061193 | 13061193 | - | 0        | 0          | -25.77001102 |
| chr10 | 13061222 | 13061222 | - | 0        | 0          | -32.67656133 |
| chr10 | 13572374 | 13572374 | - | 8.16E-11 | 3.07E-09   | -27.56060782 |
| chr10 | 13850250 | 13850250 | - | 2.84E-06 | 5.33E-05   | -28.91566265 |
| chr10 | 13850280 | 13850280 | - | 2.01E-05 | 0.00030918 | -32.46007285 |
| chr10 | 14016445 | 14016445 | - | 0        | 0          | -25.50551681 |
| chr10 | 14016457 | 14016457 | - | 0        | 0          | -26.85531465 |
| chr10 | 14281655 | 14281655 | + | 0        | 0          | -33.34695976 |

|       |          |          |   |          |            |              |
|-------|----------|----------|---|----------|------------|--------------|
| chr10 | 14281656 | 14281656 | - | 0        | 0          | -29.33765834 |
| chr10 | 14281666 | 14281666 | + | 0        | 0          | -29.96608253 |
| chr10 | 14281667 | 14281667 | - | 0        | 0          | -25.18657376 |
| chr10 | 14544583 | 14544583 | + | 2.11E-08 | 5.78E-07   | -27.27232282 |
| chr10 | 14544584 | 14544584 | - | 2.63E-05 | 0.00039173 | -26.32940872 |
| chr10 | 17230137 | 17230137 | + | 1.65E-07 | 3.90E-06   | -50.74668142 |
| chr10 | 17237600 | 17237600 | - | 4.41E-07 | 9.69E-06   | -33.72916667 |
| chr10 | 17653462 | 17653462 | + | 0        | 0          | -30.11148864 |
| chr10 | 18204535 | 18204535 | + | 0        | 0          | -27.87068004 |
| chr10 | 18204536 | 18204536 | - | 2.34E-12 | 1.04E-10   | -26.45995551 |
| chr10 | 18317697 | 18317697 | + | 5.47E-10 | 1.86E-08   | -32.48287146 |
| chr10 | 18317708 | 18317708 | + | 1.52E-09 | 4.88E-08   | -32.66680481 |
| chr10 | 18844627 | 18844627 | - | 0        | 0          | -30.90108647 |
| chr10 | 19338981 | 19338981 | - | 8.29E-10 | 2.76E-08   | -25.53499132 |
| chr10 | 19361673 | 19361673 | + | 0        | 0          | -27.63997342 |
| chr10 | 19361748 | 19361748 | + | 0        | 0          | -31.56738031 |
| chr10 | 19361749 | 19361749 | - | 0        | 0          | -43.07805731 |
| chr10 | 19361764 | 19361764 | + | 0        | 0          | -38.17933931 |
| chr10 | 19361893 | 19361893 | - | 0        | 0          | -35.8477237  |
| chr10 | 19361933 | 19361933 | - | 0        | 0          | -40.42297172 |
| chr10 | 19691652 | 19691652 | + | 3.70E-07 | 8.24E-06   | -38.08278867 |
| chr10 | 19818806 | 19818806 | - | 0        | 0          | -32.43237747 |
| chr10 | 19818874 | 19818874 | + | 0        | 0          | -28.01949122 |
| chr10 | 19818875 | 19818875 | - | 0        | 0          | -29.25029348 |
| chr10 | 19818890 | 19818890 | + | 0        | 0          | -30.25004378 |
| chr10 | 19818891 | 19818891 | - | 0        | 0          | -33.63110008 |
| chr10 | 19818895 | 19818895 | + | 0        | 0          | -35.20211302 |
| chr10 | 19818933 | 19818933 | + | 0        | 0          | -27.82787534 |
| chr10 | 19818934 | 19818934 | - | 0        | 0          | -30.79810354 |
| chr10 | 19818950 | 19818950 | - | 0        | 0          | -34.63299219 |
| chr10 | 19893415 | 19893415 | + | 1.10E-06 | 2.25E-05   | -32.71099744 |
| chr10 | 20548847 | 20548847 | + | 1.56E-05 | 0.00024576 | -37.35418218 |
| chr10 | 20548865 | 20548865 | + | 1.55E-07 | 3.70E-06   | -42.46964609 |
| chr10 | 21146305 | 21146305 | + | 0        | 0          | -30.17944273 |
| chr10 | 21494517 | 21494517 | - | 1.21E-14 | 6.71E-13   | -25.8657739  |
| chr10 | 21824912 | 21824912 | - | 5.30E-11 | 2.03E-09   | -29.75834741 |
| chr10 | 21991592 | 21991592 | - | 2.72E-07 | 6.21E-06   | -33.18008878 |
| chr10 | 21991610 | 21991610 | - | 3.21E-05 | 0.00046726 | -26.25160462 |
| chr10 | 22058472 | 22058472 | - | 2.22E-16 | 1.43E-14   | -26.31888917 |
| chr10 | 22191492 | 22191492 | - | 7.38E-10 | 2.47E-08   | -39.72500929 |
| chr10 | 22191501 | 22191501 | - | 3.08E-11 | 1.21E-09   | -35.29586679 |

|       |          |          |   |            |            |              |
|-------|----------|----------|---|------------|------------|--------------|
| chr10 | 22191525 | 22191525 | - | 3.09E-07   | 6.98E-06   | -32.45394252 |
| chr10 | 23346036 | 23346036 | + | 0          | 0          | -26.24293785 |
| chr10 | 23350806 | 23350806 | - | 7.03E-14   | 3.63E-12   | -61.35794031 |
| chr10 | 23350843 | 23350843 | - | 0.00038084 | 0.00395891 | -30.1663249  |
| chr10 | 24596231 | 24596231 | - | 2.05E-06   | 3.95E-05   | -30.45977011 |
| chr10 | 24684320 | 24684320 | - | 0.00037404 | 0.00390054 | -27.37339196 |
| chr10 | 31080115 | 31080115 | - | 0.00031308 | 0.00335691 | -38.0952381  |
| chr10 | 31600284 | 31600284 | - | 1.77E-11   | 7.18E-10   | -35.625      |
| chr10 | 39109906 | 39109906 | - | 2.66E-15   | 1.57E-13   | -30.49543617 |
| chr10 | 39172828 | 39172828 | + | 1.22E-07   | 2.96E-06   | -28.34304893 |
| chr10 | 39173053 | 39173053 | - | 4.74E-05   | 0.00065886 | -26.99890471 |
| chr10 | 39471849 | 39471849 | - | 0          | 0          | -26.84656805 |
| chr10 | 39471859 | 39471859 | - | 0          | 0          | -27.39539615 |
| chr10 | 39488214 | 39488214 | + | 0          | 0          | -30.09260576 |
| chr10 | 39552700 | 39552700 | + | 2.92E-10   | 1.03E-08   | -39.9068323  |
| chr10 | 39659995 | 39659995 | - | 2.07E-10   | 7.41E-09   | -26.2624676  |
| chr10 | 39926444 | 39926444 | - | 0.00074496 | 0.00692868 | -31.49065955 |
| chr10 | 39926604 | 39926604 | - | 0          | 0          | -30.95136048 |
| chr10 | 40198133 | 40198133 | + | 4.31E-06   | 7.76E-05   | -30.47619048 |
| chr10 | 40425661 | 40425661 | + | 0          | 0          | -27.803723   |
| chr10 | 40425710 | 40425710 | - | 0          | 0          | -36.19693095 |
| chr10 | 40810525 | 40810525 | + | 4.23E-09   | 1.28E-07   | -28.97116325 |
| chr10 | 41598286 | 41598286 | + | 0          | 0          | -34.13931394 |
| chr10 | 41598455 | 41598455 | + | 1.11E-16   | 7.26E-15   | -28.03254121 |
| chr10 | 41598604 | 41598604 | - | 0          | 0          | -34.26281458 |
| chr10 | 41598637 | 41598637 | - | 3.11E-15   | 1.82E-13   | -25.20253351 |
| chr10 | 42855423 | 42855423 | + | 0          | 0          | -34.3164794  |
| chr10 | 42855467 | 42855467 | - | 0          | 0          | -28.73719443 |
| chr10 | 42952278 | 42952278 | - | 0          | 0          | -33.13804375 |
| chr10 | 42952291 | 42952291 | - | 0          | 0          | -35.37092206 |
| chr10 | 43037576 | 43037576 | - | 0          | 0          | -25.23720714 |
| chr10 | 43695463 | 43695463 | - | 7.46E-05   | 0.00097842 | -40.74074074 |
| chr10 | 43719018 | 43719018 | + | 0          | 0          | -28.74571532 |
| chr10 | 43762724 | 43762724 | + | 0          | 0          | -28.36504902 |
| chr10 | 44148574 | 44148574 | + | 0          | 0          | -27.76045447 |
| chr10 | 44148575 | 44148575 | - | 0          | 0          | -26.37197497 |
| chr10 | 44148616 | 44148616 | + | 0          | 0          | -37.40330156 |
| chr10 | 44383353 | 44383353 | + | 0          | 0          | -31.87766714 |
| chr10 | 44456617 | 44456617 | + | 0          | 0          | -32.48266955 |
| chr10 | 44456709 | 44456709 | - | 0          | 0          | -43.22888434 |
| chr10 | 44456729 | 44456729 | + | 0          | 0          | -38.07165    |

|       |          |          |   |            |            |              |
|-------|----------|----------|---|------------|------------|--------------|
| chr10 | 44456844 | 44456844 | - | 0          | 0          | -40.61018707 |
| chr10 | 44456849 | 44456849 | + | 0          | 0          | -37.47963818 |
| chr10 | 44456850 | 44456850 | - | 0          | 0          | -35.07991451 |
| chr10 | 44456908 | 44456908 | + | 1.05E-12   | 4.84E-11   | -55.24034673 |
| chr10 | 44456909 | 44456909 | - | 0          | 0          | -43.90218341 |
| chr10 | 44456911 | 44456911 | + | 5.50E-07   | 1.19E-05   | -41.48977987 |
| chr10 | 45118259 | 45118259 | + | 0.0001103  | 0.00137173 | -37.55555556 |
| chr10 | 45118521 | 45118521 | - | 1.34E-07   | 3.23E-06   | -27.05482363 |
| chr10 | 45807820 | 45807820 | - | 3.33E-15   | 1.95E-13   | -28.79567328 |
| chr10 | 50168565 | 50168565 | + | 2.68E-06   | 5.05E-05   | -32.695462   |
| chr10 | 51620366 | 51620366 | + | 4.21E-08   | 1.10E-06   | -37.27272727 |
| chr10 | 52385019 | 52385019 | - | 8.33E-15   | 4.69E-13   | -30.40545216 |
| chr10 | 56115696 | 56115696 | - | 0          | 0          | -30.87618007 |
| chr10 | 56115704 | 56115704 | + | 0          | 0          | -25.39374591 |
| chr10 | 56115705 | 56115705 | - | 0          | 0          | -30.04352193 |
| chr10 | 56115710 | 56115710 | + | 0          | 0          | -32.05005102 |
| chr10 | 56115713 | 56115713 | + | 0          | 0          | -25.24846326 |
| chr10 | 56115719 | 56115719 | + | 0          | 0          | -29.97859491 |
| chr10 | 56115728 | 56115728 | + | 0          | 0          | -33.74550875 |
| chr10 | 56115741 | 56115741 | + | 0          | 0          | -37.07361813 |
| chr10 | 56115746 | 56115746 | + | 0          | 0          | -33.95833333 |
| chr10 | 56115815 | 56115815 | - | 0          | 0          | -29.34049352 |
| chr10 | 56115851 | 56115851 | - | 0          | 0          | -37.52745136 |
| chr10 | 56608867 | 56608867 | - | 0.00032787 | 0.00348964 | -26.34453782 |
| chr10 | 58232486 | 58232486 | + | 1.42E-06   | 2.83E-05   | 38.23529412  |
| chr10 | 58746685 | 58746685 | + | 0.0001531  | 0.00182168 | -28.00324675 |
| chr10 | 59470604 | 59470604 | + | 0.00067199 | 0.00636509 | 28.57142857  |
| chr10 | 59556717 | 59556717 | - | 7.88E-13   | 3.68E-11   | -29.13298021 |
| chr10 | 59863620 | 59863620 | - | 0          | 0          | -36.14253941 |
| chr10 | 59864440 | 59864440 | + | 3.29E-07   | 7.40E-06   | -25.6314407  |
| chr10 | 59889685 | 59889685 | - | 0          | 0          | -54.37782076 |
| chr10 | 59889723 | 59889723 | - | 6.72E-08   | 1.70E-06   | -27.29851709 |
| chr10 | 59911670 | 59911670 | - | 0          | 0          | -38.80118173 |
| chr10 | 59911677 | 59911677 | - | 0          | 0          | -43.51374381 |
| chr10 | 59911683 | 59911683 | - | 0          | 0          | -27.24598742 |
| chr10 | 59911738 | 59911738 | + | 0          | 0          | -27.038839   |
| chr10 | 59919740 | 59919740 | + | 0          | 0          | -35.88906304 |
| chr10 | 59919777 | 59919777 | + | 0          | 0          | -27.9977069  |
| chr10 | 60108430 | 60108430 | + | 6.52E-11   | 2.48E-09   | -27.20650246 |
| chr10 | 60186140 | 60186140 | + | 3.10E-09   | 9.57E-08   | -25.02917785 |
| chr10 | 60186354 | 60186354 | + | 8.26E-08   | 2.06E-06   | -25.61911115 |

|       |          |          |   |            |            |              |
|-------|----------|----------|---|------------|------------|--------------|
| chr10 | 60186640 | 60186640 | - | 1.41E-05   | 0.00022475 | -28.70521522 |
| chr10 | 60194538 | 60194538 | - | 6.00E-08   | 1.53E-06   | -30.23643024 |
| chr10 | 60279551 | 60279551 | - | 4.04E-05   | 0.00057167 | -43.67567568 |
| chr10 | 60333854 | 60333854 | - | 6.84E-07   | 1.45E-05   | -39.70823697 |
| chr10 | 60495199 | 60495199 | - | 0          | 0          | -26.37958854 |
| chr10 | 60593148 | 60593148 | - | 6.44E-15   | 3.67E-13   | -26.3144684  |
| chr10 | 60593185 | 60593185 | - | 0          | 0          | -39.79555385 |
| chr10 | 60593348 | 60593348 | - | 9.21E-10   | 3.05E-08   | -28.8911381  |
| chr10 | 60593376 | 60593376 | - | 1.91E-08   | 5.26E-07   | -26.71896504 |
| chr10 | 60615997 | 60615997 | + | 0.00111757 | 0.00966907 | -31.74486804 |
| chr10 | 60624599 | 60624599 | + | 0          | 0          | -26.75874338 |
| chr10 | 60624629 | 60624629 | + | 0          | 0          | -28.4233497  |
| chr10 | 60624641 | 60624641 | + | 0          | 0          | -32.44312363 |
| chr10 | 60624642 | 60624642 | - | 0          | 0          | -25.27527528 |
| chr10 | 60624663 | 60624663 | - | 0          | 0          | -27.9897872  |
| chr10 | 60685779 | 60685779 | + | 1.89E-07   | 4.44E-06   | -28.63451087 |
| chr10 | 60685796 | 60685796 | + | 8.03E-08   | 2.01E-06   | -32.77442562 |
| chr10 | 60691975 | 60691975 | - | 0          | 0          | -28.9820529  |
| chr10 | 60691994 | 60691994 | + | 0          | 0          | -40.3429288  |
| chr10 | 60692206 | 60692206 | + | 0.00019475 | 0.00223994 | -34.35047951 |
| chr10 | 60692207 | 60692207 | - | 1.35E-12   | 6.16E-11   | -28.84210526 |
| chr10 | 60706590 | 60706590 | - | 0.00065572 | 0.00623687 | -37.47560182 |
| chr10 | 60793167 | 60793167 | - | 1.07E-05   | 0.00017593 | -27.85123967 |
| chr10 | 60814838 | 60814838 | + | 1.09E-10   | 4.03E-09   | -47.60638298 |
| chr10 | 60815534 | 60815534 | + | 0          | 0          | -28.23347296 |
| chr10 | 60826398 | 60826398 | - | 0          | 0          | -25.33260377 |
| chr10 | 60826422 | 60826422 | - | 0          | 0          | -32.04627161 |
| chr10 | 60826435 | 60826435 | + | 2.00E-15   | 1.19E-13   | -25.66176721 |
| chr10 | 61051374 | 61051374 | - | 0.00010984 | 0.00136677 | 40.5141844   |
| chr10 | 61069155 | 61069155 | - | 0          | 0          | -35.95704369 |
| chr10 | 61184194 | 61184194 | + | 2.03E-10   | 7.29E-09   | -32.01203137 |
| chr10 | 61370824 | 61370824 | - | 0          | 0          | -31.02494706 |
| chr10 | 61496437 | 61496437 | - | 0          | 0          | -29.83029092 |
| chr10 | 61732449 | 61732449 | + | 0          | 0          | -29.40196588 |
| chr10 | 61732519 | 61732519 | - | 0          | 0          | -28.55709508 |
| chr10 | 61781963 | 61781963 | - | 4.47E-05   | 0.00062626 | -27.07961973 |
| chr10 | 61820148 | 61820148 | - | 3.98E-07   | 8.82E-06   | -44.64285714 |
| chr10 | 61820162 | 61820162 | - | 3.30E-05   | 0.00047842 | -36.40394089 |
| chr10 | 61879509 | 61879509 | + | 0          | 0          | -26.49258167 |
| chr10 | 61879935 | 61879935 | + | 0          | 0          | -28.39987017 |
| chr10 | 61879936 | 61879936 | - | 0.00033202 | 0.00352682 | -25.87387387 |

|       |          |          |   |            |            |              |
|-------|----------|----------|---|------------|------------|--------------|
| chr10 | 61928586 | 61928586 | + | 7.66E-15   | 4.33E-13   | -36.10241503 |
| chr10 | 61928605 | 61928605 | + | 2.01E-12   | 8.99E-11   | -27.87776654 |
| chr10 | 61928948 | 61928948 | - | 0          | 0          | -27.60875088 |
| chr10 | 61965565 | 61965565 | - | 0          | 0          | -26.51115895 |
| chr10 | 61965578 | 61965578 | + | 3.63E-09   | 1.11E-07   | -30.79023116 |
| chr10 | 61965605 | 61965605 | + | 1.52E-09   | 4.90E-08   | -31.63120567 |
| chr10 | 62028236 | 62028236 | - | 4.42E-07   | 9.71E-06   | -33.88505747 |
| chr10 | 62208789 | 62208789 | - | 1.95E-14   | 1.06E-12   | -29.12955466 |
| chr10 | 62208803 | 62208803 | - | 0          | 0          | -47.60763297 |
| chr10 | 62208808 | 62208808 | - | 0          | 0          | -39.31902491 |
| chr10 | 62208810 | 62208810 | + | 0          | 0          | -31.3704741  |
| chr10 | 62208811 | 62208811 | - | 0          | 0          | -32.07293007 |
| chr10 | 62336328 | 62336328 | - | 1.15E-13   | 5.84E-12   | -38.6017683  |
| chr10 | 62721906 | 62721906 | + | 0          | 0          | -29.31415297 |
| chr10 | 62721959 | 62721959 | - | 0          | 0          | -27.35169724 |
| chr10 | 62865855 | 62865855 | - | 2.32E-12   | 1.03E-10   | -25.84213172 |
| chr10 | 62866228 | 62866228 | - | 0          | 0          | -27.35641965 |
| chr10 | 62866261 | 62866261 | + | 0          | 0          | -28.84409985 |
| chr10 | 62866262 | 62866262 | - | 0          | 0          | -26.28565771 |
| chr10 | 62866302 | 62866302 | + | 0          | 0          | -27.16365754 |
| chr10 | 62866303 | 62866303 | - | 0          | 0          | -27.56777215 |
| chr10 | 63366036 | 63366036 | - | 0          | 0          | -32.03400978 |
| chr10 | 63416278 | 63416278 | - | 2.00E-06   | 3.88E-05   | -29.11583595 |
| chr10 | 63416388 | 63416388 | - | 0.00022148 | 0.0024992  | -25.61561562 |
| chr10 | 67079463 | 67079463 | + | 0          | 0          | -32.94753086 |
| chr10 | 67378243 | 67378243 | + | 0          | 0          | -36.95646857 |
| chr10 | 67501950 | 67501950 | - | 3.14E-06   | 5.83E-05   | -26.45040549 |
| chr10 | 67540779 | 67540779 | + | 0          | 0          | -34.25418505 |
| chr10 | 67540907 | 67540907 | - | 0          | 0          | -25.28185383 |
| chr10 | 67547793 | 67547793 | - | 0          | 0          | -29.76740879 |
| chr10 | 67547805 | 67547805 | - | 0          | 0          | -26.54363517 |
| chr10 | 67578518 | 67578518 | + | 0.00058154 | 0.00564397 | 29.62962963  |
| chr10 | 68431127 | 68431127 | + | 1.41E-11   | 5.76E-10   | -30.40739558 |
| chr10 | 68431148 | 68431148 | + | 0          | 0          | -37.33923677 |
| chr10 | 68431149 | 68431149 | - | 0          | 0          | -38.76190518 |
| chr10 | 68431171 | 68431171 | + | 0          | 0          | -38.50755569 |
| chr10 | 68431172 | 68431172 | - | 0          | 0          | -48.09867867 |
| chr10 | 68431198 | 68431198 | - | 0          | 0          | -26.887275   |
| chr10 | 69312052 | 69312052 | + | 9.27E-06   | 0.00015463 | -34.94595986 |
| chr10 | 69924392 | 69924392 | + | 0          | 0          | -35.05903909 |
| chr10 | 70105068 | 70105068 | - | 0          | 0          | -34.14600158 |



|       |          |          |   |            |            |              |
|-------|----------|----------|---|------------|------------|--------------|
| chr10 | 70255029 | 70255029 | + | 2.63E-05   | 0.00039205 | -30.09259259 |
| chr10 | 70255047 | 70255047 | + | 0.00108442 | 0.00943378 | -26.66666667 |
| chr10 | 70289190 | 70289190 | + | 0          | 0          | -41.11507037 |
| chr10 | 70289231 | 70289231 | - | 0          | 0          | -35.97303343 |
| chr10 | 70292274 | 70292274 | - | 0          | 0          | -27.15410635 |
| chr10 | 70292352 | 70292352 | - | 0          | 0          | -36.54336735 |
| chr10 | 70292382 | 70292382 | - | 0          | 0          | -33.41354041 |
| chr10 | 72130773 | 72130773 | - | 0.00023443 | 0.00262434 | 37.03703704  |
| chr10 | 74739552 | 74739552 | + | 1.57E-05   | 0.00024706 | -37.05882353 |
| chr10 | 75015807 | 75015807 | - | 1.82E-05   | 0.00028257 | -28.31325301 |
| chr10 | 75319559 | 75319559 | + | 0          | 0          | -30.37868564 |
| chr10 | 75323072 | 75323072 | - | 0          | 0          | -28.94293586 |
| chr10 | 75424612 | 75424612 | + | 4.39E-14   | 2.31E-12   | -31.08688655 |
| chr10 | 75560806 | 75560806 | - | 2.41E-14   | 1.30E-12   | -29.87512237 |
| chr10 | 75560826 | 75560826 | + | 6.99E-15   | 3.97E-13   | -33.15298477 |
| chr10 | 75560827 | 75560827 | - | 1.60E-09   | 5.14E-08   | -27.85272558 |
| chr10 | 75561223 | 75561223 | + | 1.21E-13   | 6.13E-12   | -42.03853637 |
| chr10 | 75561237 | 75561237 | + | 1.74E-12   | 7.86E-11   | -42.22682483 |
| chr10 | 75561269 | 75561269 | + | 2.03E-12   | 9.08E-11   | -41.87856372 |
| chr10 | 75882350 | 75882350 | + | 0          | 0          | -28.31604041 |
| chr10 | 75931518 | 75931518 | + | 4.51E-06   | 8.08E-05   | -32.65306122 |
| chr10 | 75931546 | 75931546 | + | 2.61E-07   | 5.99E-06   | -37.44329897 |
| chr10 | 75931554 | 75931554 | + | 0.00012592 | 0.00153859 | -25.26460481 |
| chr10 | 75931792 | 75931792 | + | 0.00013931 | 0.00167924 | -49.62121212 |
| chr10 | 75951052 | 75951052 | - | 0          | 0          | -36.72186255 |
| chr10 | 77026011 | 77026011 | - | 3.15E-08   | 8.39E-07   | -31.80465533 |
| chr10 | 77134234 | 77134234 | + | 0          | 0          | -27.29472802 |
| chr10 | 77134794 | 77134794 | + | 0          | 0          | -35.97583879 |
| chr10 | 77134918 | 77134918 | - | 0          | 0          | -35.51401869 |
| chr10 | 77151229 | 77151229 | + | 0          | 0          | -29.5279213  |
| chr10 | 77251362 | 77251362 | + | 0          | 0          | -33.73034054 |
| chr10 | 77251440 | 77251440 | - | 0          | 0          | -29.43601821 |
| chr10 | 77266381 | 77266381 | + | 1.11E-16   | 7.26E-15   | -29.31952188 |
| chr10 | 77449876 | 77449876 | + | 3.20E-06   | 5.94E-05   | -25.0877193  |
| chr10 | 77589440 | 77589440 | + | 0          | 0          | -36.43916935 |
| chr10 | 77664560 | 77664560 | + | 0          | 0          | -25.40345395 |
| chr10 | 78043373 | 78043373 | + | 2.18E-06   | 4.19E-05   | -26.55120623 |
| chr10 | 78049158 | 78049158 | - | 4.30E-06   | 7.75E-05   | -31.92857143 |
| chr10 | 78260353 | 78260353 | + | 0          | 0          | -43.81705251 |
| chr10 | 78298983 | 78298983 | - | 0          | 0          | -26.23281746 |
| chr10 | 78388544 | 78388544 | + | 0          | 0          | -27.85286148 |

|       |          |          |   |            |            |              |
|-------|----------|----------|---|------------|------------|--------------|
| chr10 | 78481698 | 78481698 | + | 0.00089007 | 0.00802641 | -27.27832512 |
| chr10 | 78487638 | 78487638 | + | 0          | 0          | -32.37578061 |
| chr10 | 79675611 | 79675611 | - | 0          | 0          | -25.92117547 |
| chr10 | 79735495 | 79735495 | + | 0          | 0          | -28.02305412 |
| chr10 | 79735519 | 79735519 | - | 0          | 0          | -28.6153166  |
| chr10 | 79735521 | 79735521 | - | 0          | 0          | -32.95683493 |
| chr10 | 79735550 | 79735550 | - | 0          | 0          | -26.18772372 |
| chr10 | 79735553 | 79735553 | - | 0          | 0          | -25.0531189  |
| chr10 | 79735560 | 79735560 | - | 0          | 0          | -28.42468208 |
| chr10 | 79735673 | 79735673 | + | 0          | 0          | -26.64903517 |
| chr10 | 79735708 | 79735708 | + | 4.42E-11   | 1.71E-09   | -26.49981597 |
| chr10 | 79768047 | 79768047 | + | 1.05E-07   | 2.57E-06   | -33.98588821 |
| chr10 | 79803711 | 79803711 | + | 0          | 0          | -26.59607825 |
| chr10 | 79803748 | 79803748 | - | 0          | 0          | -43.46365915 |
| chr10 | 79803796 | 79803796 | - | 0          | 0          | -25.41449215 |
| chr10 | 79805896 | 79805896 | + | 0          | 0          | -29.00290177 |
| chr10 | 79805967 | 79805967 | - | 0          | 0          | -32.52569471 |
| chr10 | 79852235 | 79852235 | + | 0          | 0          | -28.43411974 |
| chr10 | 79852236 | 79852236 | - | 0          | 0          | -31.52004823 |
| chr10 | 79882609 | 79882609 | - | 0          | 0          | -26.34449375 |
| chr10 | 79918384 | 79918384 | - | 0          | 0          | -59.62059621 |
| chr10 | 79918978 | 79918978 | + | 0          | 0          | -42.49949822 |
| chr10 | 79918983 | 79918983 | + | 0          | 0          | -49.96703659 |
| chr10 | 79919125 | 79919125 | + | 0          | 0          | -33.26149425 |
| chr10 | 79919126 | 79919126 | - | 1.22E-13   | 6.15E-12   | -33.26238978 |
| chr10 | 79919162 | 79919162 | + | 0          | 0          | -45.26814926 |
| chr10 | 79919163 | 79919163 | - | 0          | 0          | -49.97150672 |
| chr10 | 79919204 | 79919204 | - | 0          | 0          | -39.16022323 |
| chr10 | 79919221 | 79919221 | + | 0          | 0          | -36.89888117 |
| chr10 | 79919231 | 79919231 | + | 0          | 0          | -26.98954692 |
| chr10 | 79919268 | 79919268 | + | 0          | 0          | -42.95544819 |
| chr10 | 79919352 | 79919352 | - | 7.14E-08   | 1.80E-06   | -29.75829507 |
| chr10 | 79919378 | 79919378 | + | 1.11E-16   | 7.26E-15   | -33.40801887 |
| chr10 | 79919407 | 79919407 | + | 2.74E-13   | 1.34E-11   | -37.22917213 |
| chr10 | 79919534 | 79919534 | - | 0          | 0          | -37.07238214 |
| chr10 | 79919556 | 79919556 | - | 0          | 0          | -40.18232518 |
| chr10 | 79919558 | 79919558 | - | 0          | 0          | -33.52746249 |
| chr10 | 79919573 | 79919573 | + | 0          | 0          | -49.52479465 |
| chr10 | 79919609 | 79919609 | + | 0          | 0          | -41.79296066 |
| chr10 | 79919693 | 79919693 | - | 2.34E-13   | 1.15E-11   | -30.3798487  |
| chr10 | 79921901 | 79921901 | + | 0          | 0          | -26.72167702 |

|       |          |          |   |            |            |              |
|-------|----------|----------|---|------------|------------|--------------|
| chr10 | 79921902 | 79921902 | - | 0          | 0          | -31.94226237 |
| chr10 | 79921910 | 79921910 | - | 0          | 0          | -28.77585403 |
| chr10 | 79921917 | 79921917 | - | 0          | 0          | -43.71953193 |
| chr10 | 79921928 | 79921928 | - | 0          | 0          | -45.9649351  |
| chr10 | 79921940 | 79921940 | + | 0          | 0          | -26.43410654 |
| chr10 | 79921941 | 79921941 | - | 0          | 0          | -31.99307501 |
| chr10 | 79921963 | 79921963 | + | 0          | 0          | -40.85378924 |
| chr10 | 79921964 | 79921964 | - | 0          | 0          | -37.57496149 |
| chr10 | 79921967 | 79921967 | + | 0          | 0          | -44.85056033 |
| chr10 | 79921968 | 79921968 | - | 0          | 0          | -42.07933888 |
| chr10 | 79921974 | 79921974 | + | 0          | 0          | -50.58784376 |
| chr10 | 79921975 | 79921975 | - | 0          | 0          | -40.51418524 |
| chr10 | 79921987 | 79921987 | + | 0          | 0          | -49.80491445 |
| chr10 | 79921988 | 79921988 | - | 0          | 0          | -48.84706638 |
| chr10 | 79922008 | 79922008 | - | 0          | 0          | -31.68259593 |
| chr10 | 79947069 | 79947069 | - | 0          | 0          | -38.64877135 |
| chr10 | 79947579 | 79947579 | + | 3.31E-13   | 1.60E-11   | -41.46267203 |
| chr10 | 79947596 | 79947596 | + | 2.24E-14   | 1.21E-12   | -45.50177096 |
| chr10 | 79947748 | 79947748 | - | 0          | 0          | -25.35788601 |
| chr10 | 79988271 | 79988271 | + | 0          | 0          | -26.129779   |
| chr10 | 80019221 | 80019221 | + | 0          | 0          | -30.83945841 |
| chr10 | 80019259 | 80019259 | + | 5.62E-13   | 2.66E-11   | -26.49430456 |
| chr10 | 80019390 | 80019390 | + | 0.00097107 | 0.00861987 | -29.25925926 |
| chr10 | 80019617 | 80019617 | - | 2.84E-05   | 0.00041931 | -26.99430199 |
| chr10 | 80051143 | 80051143 | - | 0          | 0          | -34.50829607 |
| chr10 | 80131577 | 80131577 | - | 1.35E-09   | 4.38E-08   | -28.79766361 |
| chr10 | 80131581 | 80131581 | - | 1.11E-16   | 7.26E-15   | -38.58220211 |
| chr10 | 80131590 | 80131590 | - | 6.42E-13   | 3.02E-11   | -32.91494942 |
| chr10 | 80131617 | 80131617 | - | 1.79E-13   | 8.88E-12   | -34.67925387 |
| chr10 | 80131627 | 80131627 | - | 2.42E-11   | 9.64E-10   | -31.1946533  |
| chr10 | 80131957 | 80131957 | + | 0          | 0          | -32.0494856  |
| chr10 | 80132002 | 80132002 | + | 0          | 0          | -32.21693544 |
| chr10 | 80132008 | 80132008 | + | 1.11E-13   | 5.63E-12   | -25.22066035 |
| chr10 | 80132016 | 80132016 | + | 0          | 0          | -35.83408014 |
| chr10 | 80132019 | 80132019 | + | 0          | 0          | -32.20609268 |
| chr10 | 80132024 | 80132024 | + | 0          | 0          | -27.75862069 |
| chr10 | 80132034 | 80132034 | + | 2.22E-16   | 1.43E-14   | -29.37065935 |
| chr10 | 80132036 | 80132036 | + | 0          | 0          | -36.33313727 |
| chr10 | 80136399 | 80136399 | + | 0          | 0          | -27.29793473 |
| chr10 | 80164463 | 80164463 | + | 0          | 0          | -35.92870232 |
| chr10 | 80164564 | 80164564 | - | 0          | 0          | -35.33104098 |

|       |          |          |   |            |            |              |
|-------|----------|----------|---|------------|------------|--------------|
| chr10 | 80164600 | 80164600 | - | 0          | 0          | -27.94341773 |
| chr10 | 80164606 | 80164606 | - | 0          | 0          | -28.11982825 |
| chr10 | 80208940 | 80208940 | + | 2.99E-09   | 9.24E-08   | -25.40836941 |
| chr10 | 80209140 | 80209140 | - | 7.33E-13   | 3.43E-11   | -25.03626827 |
| chr10 | 80209169 | 80209169 | - | 2.02E-12   | 9.03E-11   | -28.42012357 |
| chr10 | 80228846 | 80228846 | + | 0          | 0          | -30.17954418 |
| chr10 | 80285890 | 80285890 | + | 5.10E-06   | 9.04E-05   | -25.87034814 |
| chr10 | 80293595 | 80293595 | + | 0          | 0          | -25.98348765 |
| chr10 | 80312729 | 80312729 | - | 1.98E-11   | 7.98E-10   | -31.11111111 |
| chr10 | 80326210 | 80326210 | - | 2.00E-15   | 1.19E-13   | -29.55121704 |
| chr10 | 80341625 | 80341625 | + | 2.91E-09   | 9.02E-08   | -26.20967742 |
| chr10 | 80341627 | 80341627 | + | 3.29E-11   | 1.29E-09   | -32.5905826  |
| chr10 | 80341640 | 80341640 | + | 1.36E-06   | 2.73E-05   | -25.08585934 |
| chr10 | 80341664 | 80341664 | + | 1.16E-13   | 5.85E-12   | -31.07508378 |
| chr10 | 80349164 | 80349164 | + | 0          | 0          | -33.13006303 |
| chr10 | 80386178 | 80386178 | + | 1.46E-06   | 2.90E-05   | -26.7104543  |
| chr10 | 80472132 | 80472132 | + | 1.11E-16   | 7.26E-15   | -30.16269643 |
| chr10 | 80472185 | 80472185 | - | 0          | 0          | -27.76180698 |
| chr10 | 80536642 | 80536642 | + | 1.36E-13   | 6.82E-12   | -25.28409091 |
| chr10 | 80657234 | 80657234 | + | 3.33E-16   | 2.11E-14   | -29.07242063 |
| chr10 | 80657260 | 80657260 | + | 0          | 0          | -32.48978734 |
| chr10 | 80810385 | 80810385 | + | 2.20E-12   | 9.80E-11   | -26.16330114 |
| chr10 | 80810499 | 80810499 | - | 0          | 0          | -27.19641195 |
| chr10 | 80843500 | 80843500 | + | 0.00030086 | 0.00324524 | 25.68299842  |
| chr10 | 80856147 | 80856147 | + | 4.52E-11   | 1.75E-09   | -29.01467655 |
| chr10 | 80898092 | 80898092 | + | 0          | 0          | -33.33549643 |
| chr10 | 80898097 | 80898097 | + | 0          | 0          | -29.62709701 |
| chr10 | 80898114 | 80898114 | + | 0          | 0          | -33.68069057 |
| chr10 | 80898120 | 80898120 | + | 0          | 0          | -27.70558215 |
| chr10 | 80898127 | 80898127 | + | 0          | 0          | -25.58036505 |
| chr10 | 80898142 | 80898142 | - | 0          | 0          | -33.28144369 |
| chr10 | 80898174 | 80898174 | - | 0          | 0          | -32.68934626 |
| chr10 | 80932097 | 80932097 | + | 1.37E-12   | 6.23E-11   | -26.12991142 |
| chr10 | 80961257 | 80961257 | + | 0          | 0          | -36.22926336 |
| chr10 | 80961288 | 80961288 | - | 0          | 0          | -42.15026888 |
| chr10 | 80961302 | 80961302 | - | 0          | 0          | -33.8751006  |
| chr10 | 80961362 | 80961362 | - | 1.79E-10   | 6.48E-09   | -26.87228825 |
| chr10 | 81000559 | 81000559 | - | 5.66E-10   | 1.93E-08   | -32.29618483 |
| chr10 | 81041947 | 81041947 | + | 7.01E-06   | 0.00012023 | -32.98245614 |
| chr10 | 81098852 | 81098852 | + | 1.21E-12   | 5.54E-11   | -33.06650246 |
| chr10 | 81161813 | 81161813 | + | 0          | 0          | -25.9588573  |

|       |          |          |   |          |            |              |
|-------|----------|----------|---|----------|------------|--------------|
| chr10 | 81161861 | 81161861 | + | 0        | 0          | -29.40100883 |
| chr10 | 81174764 | 81174764 | + | 0        | 0          | -31.11962732 |
| chr10 | 81174792 | 81174792 | + | 0        | 0          | -30.99525974 |
| chr10 | 81268827 | 81268827 | - | 3.08E-07 | 6.97E-06   | -28.33742834 |
| chr10 | 81284681 | 81284681 | + | 0        | 0          | -28.11602386 |
| chr10 | 81291073 | 81291073 | + | 0        | 0          | -27.13670614 |
| chr10 | 81291182 | 81291182 | + | 0        | 0          | -28.30395757 |
| chr10 | 81291183 | 81291183 | - | 0        | 0          | -29.03118779 |
| chr10 | 81291204 | 81291204 | - | 0        | 0          | -27.61618373 |
| chr10 | 81301196 | 81301196 | + | 4.92E-11 | 1.90E-09   | -25.32656023 |
| chr10 | 81301370 | 81301370 | - | 0        | 0          | -28.23802813 |
| chr10 | 81317097 | 81317097 | + | 0        | 0          | -27.86068197 |
| chr10 | 81317133 | 81317133 | + | 0        | 0          | -36.78128249 |
| chr10 | 81341266 | 81341266 | + | 6.13E-05 | 0.00082493 | -26.48351648 |
| chr10 | 81341267 | 81341267 | - | 2.67E-08 | 7.20E-07   | -35.50387597 |
| chr10 | 81347094 | 81347094 | - | 3.21E-13 | 1.55E-11   | -26.32373304 |
| chr10 | 81349422 | 81349422 | - | 0        | 0          | -27.1265867  |
| chr10 | 81349427 | 81349427 | - | 0        | 0          | -37.7360601  |
| chr10 | 81364711 | 81364711 | - | 1.97E-07 | 4.60E-06   | -26.07142857 |
| chr10 | 81385715 | 81385715 | - | 0        | 0          | -29.53473211 |
| chr10 | 81385738 | 81385738 | + | 0        | 0          | -30.43060468 |
| chr10 | 81385739 | 81385739 | - | 0        | 0          | -29.67730575 |
| chr10 | 81385753 | 81385753 | + | 0        | 0          | -30.11356537 |
| chr10 | 81401248 | 81401248 | + | 0        | 0          | -50.68897835 |
| chr10 | 81401249 | 81401249 | - | 5.07E-10 | 1.74E-08   | -39.05021174 |
| chr10 | 81401259 | 81401259 | + | 0        | 0          | -45.7232692  |
| chr10 | 81401263 | 81401263 | + | 0        | 0          | -38.44056707 |
| chr10 | 81401271 | 81401271 | + | 0        | 0          | -49.59311193 |
| chr10 | 81401463 | 81401463 | + | 0        | 0          | -40.59321055 |
| chr10 | 81402032 | 81402032 | + | 0        | 0          | -41.03093329 |
| chr10 | 81402316 | 81402316 | + | 0        | 0          | -26.9314872  |
| chr10 | 81402317 | 81402317 | - | 2.54E-13 | 1.24E-11   | -28.79630918 |
| chr10 | 81402385 | 81402385 | - | 0        | 0          | -35.64118317 |
| chr10 | 81402396 | 81402396 | - | 0        | 0          | -43.49553361 |
| chr10 | 81404318 | 81404318 | + | 0        | 0          | -36.18467882 |
| chr10 | 81404324 | 81404324 | + | 7.77E-16 | 4.79E-14   | -31.06623984 |
| chr10 | 81404845 | 81404845 | + | 0        | 0          | -43.48189009 |
| chr10 | 81404878 | 81404878 | + | 0        | 0          | -31.68836252 |
| chr10 | 81404879 | 81404879 | - | 0        | 0          | -31.2549369  |
| chr10 | 81404903 | 81404903 | - | 0        | 0          | -41.09884968 |
| chr10 | 81404910 | 81404910 | - | 0        | 0          | -44.23051475 |

|       |          |          |   |            |            |              |
|-------|----------|----------|---|------------|------------|--------------|
| chr10 | 81406108 | 81406108 | + | 3.72E-12   | 1.62E-10   | -30.90909091 |
| chr10 | 81407390 | 81407390 | + | 4.64E-10   | 1.59E-08   | -29.91532921 |
| chr10 | 81407395 | 81407395 | + | 2.05E-14   | 1.12E-12   | -36.76071622 |
| chr10 | 81408153 | 81408153 | + | 0          | 0          | -31.88092354 |
| chr10 | 81419154 | 81419154 | - | 0          | 0          | -28.09696451 |
| chr10 | 81424760 | 81424760 | + | 1.62E-06   | 3.20E-05   | -34.01759531 |
| chr10 | 81424772 | 81424772 | + | 2.20E-12   | 9.80E-11   | -49.08285895 |
| chr10 | 81424779 | 81424779 | + | 2.97E-07   | 6.73E-06   | -34.73731884 |
| chr10 | 81424787 | 81424787 | + | 2.76E-05   | 0.00040872 | -30.48780488 |
| chr10 | 81424990 | 81424990 | - | 4.53E-05   | 0.00063257 | -25.12046931 |
| chr10 | 81503159 | 81503159 | - | 0          | 0          | -26.8818524  |
| chr10 | 81541944 | 81541944 | + | 0          | 0          | -25.12910687 |
| chr10 | 81541955 | 81541955 | + | 0          | 0          | -27.52739819 |
| chr10 | 81541966 | 81541966 | + | 0          | 0          | -33.40823103 |
| chr10 | 81541971 | 81541971 | + | 0          | 0          | -31.2185992  |
| chr10 | 81572436 | 81572436 | + | 1.49E-10   | 5.44E-09   | -25.95456453 |
| chr10 | 81572479 | 81572479 | + | 8.88E-16   | 5.45E-14   | -28.59078591 |
| chr10 | 81572711 | 81572711 | + | 0          | 0          | -37.22741433 |
| chr10 | 81596002 | 81596002 | + | 0          | 0          | -26.99026136 |
| chr10 | 81596003 | 81596003 | - | 0          | 0          | -32.35503077 |
| chr10 | 81596005 | 81596005 | + | 0          | 0          | -30.42404762 |
| chr10 | 81596006 | 81596006 | - | 0          | 0          | -32.56236039 |
| chr10 | 81598948 | 81598948 | + | 1.22E-15   | 7.41E-14   | -33.82812393 |
| chr10 | 82757280 | 82757280 | + | 0          | 0          | -26.87234639 |
| chr10 | 82757335 | 82757335 | - | 0          | 0          | -35.69991325 |
| chr10 | 82890539 | 82890539 | + | 3.44E-10   | 1.20E-08   | -35.13921661 |
| chr10 | 83041237 | 83041237 | - | 6.25E-08   | 1.59E-06   | -30.37559455 |
| chr10 | 83042753 | 83042753 | + | 5.60E-10   | 1.91E-08   | -27.49945205 |
| chr10 | 83043003 | 83043003 | - | 2.24E-06   | 4.30E-05   | -28.63087095 |
| chr10 | 83080636 | 83080636 | + | 0          | 0          | -27.75014303 |
| chr10 | 83264769 | 83264769 | + | 0          | 0          | -34.15419899 |
| chr10 | 83264810 | 83264810 | + | 0          | 0          | -27.48718707 |
| chr10 | 83264811 | 83264811 | - | 0          | 0          | -34.2199367  |
| chr10 | 83264826 | 83264826 | - | 0          | 0          | -31.1238407  |
| chr10 | 83286511 | 83286511 | - | 2.55E-05   | 0.00038094 | -38.81118881 |
| chr10 | 83286554 | 83286554 | - | 0.00042318 | 0.0043237  | -31.067694   |
| chr10 | 84388958 | 84388958 | + | 0          | 0          | -34.76996198 |
| chr10 | 84388979 | 84388979 | + | 0          | 0          | -29.48415606 |
| chr10 | 84389089 | 84389089 | - | 0          | 0          | -27.4634435  |
| chr10 | 84389091 | 84389091 | - | 0          | 0          | -25.78150733 |
| chr10 | 84389107 | 84389107 | - | 0          | 0          | -26.02692736 |

|       |          |          |   |            |            |              |
|-------|----------|----------|---|------------|------------|--------------|
| chr10 | 84392201 | 84392201 | + | 0          | 0          | -32.248772   |
| chr10 | 84392218 | 84392218 | + | 0          | 0          | -30.35714286 |
| chr10 | 84392226 | 84392226 | + | 0          | 0          | -26.73681147 |
| chr10 | 84392242 | 84392242 | + | 0          | 0          | -25.69256023 |
| chr10 | 84392328 | 84392328 | + | 0          | 0          | -26.65609584 |
| chr10 | 84392336 | 84392336 | + | 0          | 0          | -26.81224826 |
| chr10 | 84392427 | 84392427 | + | 0          | 0          | -26.9047619  |
| chr10 | 84392478 | 84392478 | - | 0          | 0          | -28.3819727  |
| chr10 | 84442379 | 84442379 | - | 9.85E-06   | 0.00016319 | -25.88970662 |
| chr10 | 84533101 | 84533101 | + | 0          | 0          | -25.7082285  |
| chr10 | 84533186 | 84533186 | - | 0          | 0          | -27.72516833 |
| chr10 | 84740724 | 84740724 | + | 1.77E-05   | 0.00027524 | -35.44749824 |
| chr10 | 84760549 | 84760549 | + | 0          | 0          | -26.50260563 |
| chr10 | 84760550 | 84760550 | - | 0          | 0          | -28.56221406 |
| chr10 | 85044537 | 85044537 | + | 2.05E-10   | 7.35E-09   | -29.20268586 |
| chr10 | 85044597 | 85044597 | + | 0          | 0          | -28.29928762 |
| chr10 | 85044598 | 85044598 | - | 0          | 0          | -30.22484136 |
| chr10 | 86066922 | 86066922 | - | 0.00014941 | 0.00178406 | -31.89269747 |
| chr10 | 86778152 | 86778152 | + | 1.98E-08   | 5.45E-07   | -33.74928285 |
| chr10 | 86820147 | 86820147 | + | 0          | 0          | -33.94088407 |
| chr10 | 86820174 | 86820174 | + | 8.05E-12   | 3.38E-10   | -26.12894875 |
| chr10 | 86820188 | 86820188 | + | 0          | 0          | -32.73978146 |
| chr10 | 88349972 | 88349972 | - | 2.83E-13   | 1.38E-11   | -27.14754407 |
| chr10 | 88349979 | 88349979 | - | 0          | 0          | -28.40069843 |
| chr10 | 88492820 | 88492820 | - | 4.30E-11   | 1.67E-09   | -29.83781021 |
| chr10 | 89621307 | 89621307 | + | 0          | 0          | -27.7034945  |
| chr10 | 89644403 | 89644403 | + | 0.00017    | 0.00199355 | -26.47058824 |
| chr10 | 90741913 | 90741913 | - | 0.00095616 | 0.00851118 | 27.27272727  |
| chr10 | 90966069 | 90966069 | - | 0          | 0          | -31.61401827 |
| chr10 | 90969502 | 90969502 | - | 0          | 0          | -25.06280193 |
| chr10 | 91180836 | 91180836 | + | 8.62E-08   | 2.14E-06   | -28.82352941 |
| chr10 | 91187347 | 91187347 | + | 0          | 0          | -31.82301322 |
| chr10 | 91229857 | 91229857 | + | 5.76E-10   | 1.96E-08   | -31.01487314 |
| chr10 | 91229875 | 91229875 | + | 5.34E-10   | 1.82E-08   | -36.02430556 |
| chr10 | 93087627 | 93087627 | + | 4.66E-12   | 2.01E-10   | -29.59301052 |
| chr10 | 93087628 | 93087628 | - | 4.94E-12   | 2.12E-10   | -35.34455383 |
| chr10 | 93276337 | 93276337 | + | 1.98E-06   | 3.84E-05   | -46.41414141 |
| chr10 | 93276577 | 93276577 | + | 0          | 0          | -55.11350608 |
| chr10 | 93276585 | 93276585 | + | 0          | 0          | -61.09903151 |
| chr10 | 93276604 | 93276604 | + | 0          | 0          | -31.30715143 |
| chr10 | 93276610 | 93276610 | + | 0          | 0          | -53.34663446 |

|       |          |          |   |            |            |              |
|-------|----------|----------|---|------------|------------|--------------|
| chr10 | 93437194 | 93437194 | + | 4.16E-12   | 1.80E-10   | -33.69516056 |
| chr10 | 93437240 | 93437240 | + | 2.62E-10   | 9.29E-09   | -28.125      |
| chr10 | 93437244 | 93437244 | + | 2.22E-16   | 1.43E-14   | -40.81632653 |
| chr10 | 93437263 | 93437263 | - | 0          | 0          | -36.17348527 |
| chr10 | 93437296 | 93437296 | - | 0          | 0          | -30.95321765 |
| chr10 | 93820068 | 93820068 | + | 8.46E-09   | 2.45E-07   | -33.93162393 |
| chr10 | 93820098 | 93820098 | - | 3.87E-07   | 8.60E-06   | -46.96969697 |
| chr10 | 93831466 | 93831466 | - | 0          | 0          | -39.37563037 |
| chr10 | 93831485 | 93831485 | + | 0          | 0          | -34.327362   |
| chr10 | 93831486 | 93831486 | - | 0          | 0          | -35.12550882 |
| chr10 | 93831489 | 93831489 | + | 0          | 0          | -37.97174975 |
| chr10 | 93831490 | 93831490 | - | 0          | 0          | -40.47561227 |
| chr10 | 93831530 | 93831530 | + | 0          | 0          | -33.91490038 |
| chr10 | 93831531 | 93831531 | - | 0          | 0          | -39.05416987 |
| chr10 | 93831538 | 93831538 | - | 0          | 0          | -36.86968765 |
| chr10 | 94351118 | 94351118 | + | 1.11E-16   | 7.26E-15   | -34.9350584  |
| chr10 | 94514270 | 94514270 | + | 6.62E-09   | 1.95E-07   | -25.43921554 |
| chr10 | 94520590 | 94520590 | - | 0          | 0          | -33.33252857 |
| chr10 | 94573006 | 94573006 | + | 0          | 0          | -33.07829265 |
| chr10 | 94946018 | 94946018 | - | 0          | 0          | -28.02820564 |
| chr10 | 94992471 | 94992471 | + | 0          | 0          | -28.79088826 |
| chr10 | 95199887 | 95199887 | + | 1.23E-08   | 3.50E-07   | -31.53488372 |
| chr10 | 95256261 | 95256261 | + | 0          | 0          | -46.89670362 |
| chr10 | 95256269 | 95256269 | + | 0          | 0          | -51.26468128 |
| chr10 | 95256270 | 95256270 | - | 0          | 0          | -45.89967471 |
| chr10 | 95256307 | 95256307 | - | 0          | 0          | -40.49954059 |
| chr10 | 95264526 | 95264526 | - | 9.44E-15   | 5.29E-13   | -46.97478992 |
| chr10 | 95264538 | 95264538 | - | 2.22E-16   | 1.43E-14   | -55.15873016 |
| chr10 | 95264555 | 95264555 | - | 2.22E-16   | 1.43E-14   | -54.51382531 |
| chr10 | 95394446 | 95394446 | - | 1.51E-13   | 7.54E-12   | -25.10298516 |
| chr10 | 95577162 | 95577162 | - | 0.00088008 | 0.00795239 | -29.32889344 |
| chr10 | 96048206 | 96048206 | - | 0          | 0          | -26.36000899 |
| chr10 | 96264555 | 96264555 | + | 6.67E-05   | 0.0008872  | -30.26315789 |
| chr10 | 96264643 | 96264643 | - | 4.50E-10   | 1.55E-08   | -25.35809433 |
| chr10 | 97692949 | 97692949 | + | 1.27E-08   | 3.60E-07   | -25.17097784 |
| chr10 | 99270819 | 99270819 | - | 1.15E-07   | 2.80E-06   | -28.06961121 |
| chr10 | 99279429 | 99279429 | + | 0          | 0          | -30.11641929 |
| chr10 | 99279478 | 99279478 | + | 0          | 0          | -31.88108108 |
| chr10 | 99279479 | 99279479 | - | 0.00012399 | 0.00151807 | -25.29499525 |
| chr10 | 99279532 | 99279532 | - | 0          | 0          | -25.6428826  |
| chr10 | 99287262 | 99287262 | + | 3.36E-13   | 1.62E-11   | -33.36680294 |



|       |           |           |   |            |            |              |
|-------|-----------|-----------|---|------------|------------|--------------|
| chr10 | 99354148  | 99354148  | + | 3.82E-12   | 1.66E-10   | -38.95710681 |
| chr10 | 99360863  | 99360863  | + | 1.24E-05   | 0.00020022 | -37.58286588 |
| chr10 | 99534309  | 99534309  | - | 0          | 0          | -25.16449378 |
| chr10 | 102780968 | 102780968 | - | 0.00022558 | 0.00253888 | -43.77289377 |
| chr10 | 103609925 | 103609925 | - | 0          | 0          | 28.48662477  |
| chr10 | 104865090 | 104865090 | + | 0          | 0          | 31.19478561  |
| chr10 | 104865091 | 104865091 | - | 0          | 0          | 31.63046224  |
| chr10 | 107491998 | 107491998 | - | 0.0005959  | 0.00575918 | -25.95238095 |
| chr10 | 107494256 | 107494256 | + | 6.63E-05   | 0.00088257 | -28.77288471 |
| chr10 | 108113782 | 108113782 | - | 0.00065539 | 0.00623427 | -36.25615764 |
| chr10 | 108298458 | 108298458 | - | 0          | 0          | 44.08058756  |
| chr10 | 108444001 | 108444001 | + | 0          | 0          | 30.75329639  |
| chr10 | 108455271 | 108455271 | - | 0          | 0          | 68.48946986  |
| chr10 | 110600965 | 110600965 | - | 3.61E-05   | 0.00051728 | -32.41074353 |
| chr10 | 110600971 | 110600971 | - | 0.00096443 | 0.00857201 | -25.722274   |
| chr10 | 110640983 | 110640983 | + | 7.11E-09   | 2.08E-07   | -35.22713507 |
| chr10 | 110787220 | 110787220 | - | 1.81E-11   | 7.35E-10   | -36.96594427 |
| chr10 | 110828522 | 110828522 | - | 3.71E-06   | 6.79E-05   | -34          |
| chr10 | 111598811 | 111598811 | - | 2.40E-07   | 5.53E-06   | -39.69974979 |
| chr10 | 112587327 | 112587327 | - | 0.00014594 | 0.00174845 | -27.86407767 |
| chr10 | 112587369 | 112587369 | - | 0.00100311 | 0.00885364 | -29.86715529 |
| chr10 | 116264774 | 116264774 | + | 0          | 0          | -25.23624297 |
| chr10 | 116310650 | 116310650 | + | 0          | 0          | -26.38393504 |
| chr10 | 116310699 | 116310699 | + | 0          | 0          | -27.13892805 |
| chr10 | 116310700 | 116310700 | - | 1.11E-16   | 7.26E-15   | -26.77763413 |
| chr10 | 116310706 | 116310706 | - | 0          | 0          | -31.07306827 |
| chr10 | 116728081 | 116728081 | + | 0          | 0          | -33.55811404 |
| chr10 | 116728280 | 116728280 | + | 0          | 0          | -33.26118047 |
| chr10 | 116728330 | 116728330 | + | 0          | 0          | -29.24290459 |
| chr10 | 116728423 | 116728423 | - | 0          | 0          | -28.84451058 |
| chr10 | 117045439 | 117045439 | - | 0          | 0          | -27.74567172 |
| chr10 | 117150769 | 117150769 | + | 0          | 0          | -26.28363972 |
| chr10 | 117150798 | 117150798 | + | 0          | 0          | -28.59945862 |
| chr10 | 117230152 | 117230152 | - | 2.43E-05   | 0.00036511 | -29.26136364 |
| chr10 | 117390593 | 117390593 | + | 0.00029348 | 0.00317762 | -25.85287846 |
| chr10 | 117390770 | 117390770 | - | 0.00028352 | 0.00308707 | -29.67032967 |
| chr10 | 117472237 | 117472237 | - | 1.53E-05   | 0.00024254 | -25.71399429 |
| chr10 | 117472272 | 117472272 | - | 1.01E-05   | 0.00016714 | -26.10418731 |
| chr10 | 117669790 | 117669790 | - | 0          | 0          | -26.19082677 |
| chr10 | 117676149 | 117676149 | - | 3.11E-07   | 7.02E-06   | -31.37254902 |
| chr10 | 117688399 | 117688399 | - | 1.27E-09   | 4.13E-08   | -34.59746835 |

|       |           |           |   |            |            |              |
|-------|-----------|-----------|---|------------|------------|--------------|
| chr10 | 117947426 | 117947426 | - | 0          | 0          | -40.59966167 |
| chr10 | 117947438 | 117947438 | - | 0          | 0          | -39.45728332 |
| chr10 | 117947465 | 117947465 | - | 9.33E-12   | 3.89E-10   | -33.65024489 |
| chr10 | 117976267 | 117976267 | + | 1.78E-15   | 1.06E-13   | -29.92340744 |
| chr10 | 118218797 | 118218797 | + | 2.27E-07   | 5.26E-06   | 41.95652174  |
| chr10 | 118559051 | 118559051 | + | 0.00049157 | 0.00490433 | -29.04656319 |
| chr10 | 118595890 | 118595890 | - | 0.00073329 | 0.00683873 | -35.65217391 |
| chr10 | 118596548 | 118596548 | + | 1.05E-12   | 4.83E-11   | -41.11414901 |
| chr10 | 118596772 | 118596772 | - | 6.92E-11   | 2.62E-09   | -33.4788175  |
| chr10 | 118883635 | 118883635 | + | 0          | 0          | -26.71046402 |
| chr10 | 119024716 | 119024716 | + | 2.33E-12   | 1.04E-10   | -41.47592245 |
| chr10 | 119168813 | 119168813 | + | 2.40E-05   | 0.00036194 | -29.91304348 |
| chr10 | 119169014 | 119169014 | - | 0.00014709 | 0.00176031 | -29.12650602 |
| chr10 | 119169017 | 119169017 | - | 6.43E-06   | 0.0001114  | -28.0372472  |
| chr10 | 119169112 | 119169112 | - | 0          | 0          | -26.57302237 |
| chr10 | 119169119 | 119169119 | + | 2.17E-06   | 4.17E-05   | -26.62270045 |
| chr10 | 119169351 | 119169351 | - | 5.54E-09   | 1.65E-07   | -35.48936861 |
| chr10 | 120233838 | 120233838 | + | 0          | 0          | -33.36949427 |
| chr10 | 120233839 | 120233839 | - | 0          | 0          | -26.81444711 |
| chr10 | 120558169 | 120558169 | - | 6.33E-15   | 3.61E-13   | -26.20290102 |
| chr10 | 120558198 | 120558198 | - | 5.48E-14   | 2.87E-12   | -26.85703742 |
| chr10 | 120647029 | 120647029 | + | 0          | 0          | -37.67303391 |
| chr10 | 120647125 | 120647125 | - | 0          | 0          | -42.87710652 |
| chr10 | 120647159 | 120647159 | - | 0          | 0          | -47.74122553 |
| chr10 | 120647172 | 120647172 | + | 0          | 0          | -39.9605861  |
| chr10 | 120647203 | 120647203 | + | 0          | 0          | -28.43040792 |
| chr10 | 120647207 | 120647207 | + | 5.75E-11   | 2.20E-09   | -43.67363027 |
| chr10 | 120647208 | 120647208 | - | 0          | 0          | -35.86888712 |
| chr10 | 120647219 | 120647219 | + | 1.80E-07   | 4.25E-06   | -36.58383534 |
| chr10 | 120697218 | 120697218 | - | 0          | 0          | -51.86001469 |
| chr10 | 120697228 | 120697228 | - | 0          | 0          | -58.02368314 |
| chr10 | 120722163 | 120722163 | - | 0          | 0          | -30.84720806 |
| chr10 | 120801848 | 120801848 | - | 0          | 0          | -31.62292678 |
| chr10 | 120801898 | 120801898 | + | 8.67E-05   | 0.00111422 | -44.97607656 |
| chr10 | 121267251 | 121267251 | - | 0          | 0          | -25.1710427  |
| chr10 | 121411693 | 121411693 | - | 2.03E-08   | 5.57E-07   | -37.7301496  |
| chr10 | 121461922 | 121461922 | + | 3.98E-08   | 1.04E-06   | -58.42318059 |
| chr10 | 121461927 | 121461927 | + | 6.67E-06   | 0.00011499 | -52.46734398 |
| chr10 | 121477823 | 121477823 | - | 6.09E-10   | 2.06E-08   | -28.7142164  |
| chr10 | 121505626 | 121505626 | - | 0.00047915 | 0.00480045 | -29.5751634  |
| chr10 | 121506710 | 121506710 | - | 6.98E-06   | 0.00011976 | -27.88141239 |

|       |           |           |   |            |            |              |
|-------|-----------|-----------|---|------------|------------|--------------|
| chr10 | 121533674 | 121533674 | - | 2.71E-06   | 5.10E-05   | -26.73267327 |
| chr10 | 121583452 | 121583452 | - | 2.35E-05   | 0.00035407 | -27.51613142 |
| chr10 | 121583455 | 121583455 | - | 8.01E-06   | 0.00013548 | -28.5326087  |
| chr10 | 121689615 | 121689615 | - | 5.81E-08   | 1.49E-06   | -26.76190476 |
| chr10 | 121967992 | 121967992 | + | 0          | 0          | -36.95019205 |
| chr10 | 122006770 | 122006770 | + | 6.81E-06   | 0.00011725 | -64.42687747 |
| chr10 | 122196180 | 122196180 | - | 0          | 0          | -26.09160164 |
| chr10 | 122699032 | 122699032 | - | 0          | 0          | 33.57059479  |
| chr10 | 122793236 | 122793236 | + | 3.33E-16   | 2.11E-14   | -38.24969001 |
| chr10 | 122886439 | 122886439 | + | 0          | 0          | -31.57101545 |
| chr10 | 122886524 | 122886524 | - | 0          | 0          | -28.5462932  |
| chr10 | 122963344 | 122963344 | + | 0.0004853  | 0.00485171 | -28.27993898 |
| chr10 | 123266535 | 123266535 | - | 6.66E-16   | 4.13E-14   | -36.18020178 |
| chr10 | 123266776 | 123266776 | - | 0.00014437 | 0.00173187 | -27.11988304 |
| chr10 | 125843965 | 125843965 | + | 0.0008541  | 0.00775864 | -30.44217687 |
| chr10 | 126929173 | 126929173 | + | 9.19E-06   | 0.00015347 | -44.88348531 |
| chr10 | 126957001 | 126957001 | - | 0          | 0          | -37.85687382 |
| chr10 | 126982687 | 126982687 | + | 0          | 0          | -30.71049478 |
| chr10 | 126982695 | 126982695 | + | 0          | 0          | -31.77692343 |
| chr10 | 127045016 | 127045016 | - | 0          | 0          | 36.53522342  |
| chr10 | 127077639 | 127077639 | + | 0          | 0          | -37.73024361 |
| chr10 | 127077648 | 127077648 | + | 0          | 0          | -44.55110723 |
| chr10 | 127077724 | 127077724 | - | 0          | 0          | -31.98176064 |
| chr10 | 127077740 | 127077740 | - | 0          | 0          | -29.63878115 |
| chr10 | 127077742 | 127077742 | - | 0          | 0          | -29.56271648 |
| chr10 | 127079354 | 127079354 | + | 3.30E-08   | 8.76E-07   | -27.3107248  |
| chr10 | 127079357 | 127079357 | + | 3.88E-12   | 1.69E-10   | -41.31868132 |
| chr10 | 127079386 | 127079386 | + | 8.64E-13   | 4.01E-11   | -33.17736431 |
| chr10 | 127079435 | 127079435 | + | 7.10E-09   | 2.08E-07   | -33.35464621 |
| chr10 | 127079486 | 127079486 | - | 1.11E-16   | 7.26E-15   | -28.38254338 |
| chr10 | 127079498 | 127079498 | - | 2.44E-11   | 9.75E-10   | -27.83021348 |
| chr10 | 127079520 | 127079520 | + | 5.59E-13   | 2.64E-11   | -27.45795211 |
| chr10 | 127079605 | 127079605 | - | 1.95E-14   | 1.06E-12   | -26.62116041 |
| chr10 | 127081459 | 127081459 | + | 0          | 0          | -25.5984556  |
| chr10 | 127081530 | 127081530 | - | 0          | 0          | -37.31880252 |
| chr10 | 127081554 | 127081554 | - | 8.44E-15   | 4.75E-13   | -27.56380269 |
| chr10 | 127081559 | 127081559 | - | 0          | 0          | -30.47066141 |
| chr10 | 127081660 | 127081660 | + | 1.98E-11   | 8.00E-10   | -26.54953917 |
| chr10 | 127096964 | 127096964 | - | 9.97E-08   | 2.45E-06   | -34.41128285 |
| chr10 | 127167766 | 127167766 | - | 8.63E-06   | 0.00014505 | -40.03889969 |
| chr10 | 127183900 | 127183900 | - | 0          | 0          | -27.09906573 |

|       |           |           |   |          |          |              |
|-------|-----------|-----------|---|----------|----------|--------------|
| chr10 | 127183902 | 127183902 | - | 0        | 0        | -26.49354894 |
| chr10 | 127183909 | 127183909 | - | 0        | 0        | -27.4426952  |
| chr10 | 127320349 | 127320349 | + | 2.28E-06 | 4.37E-05 | -27.16049383 |
| chr10 | 127326557 | 127326557 | - | 0        | 0        | -28.99515952 |
| chr10 | 127326610 | 127326610 | + | 9.27E-07 | 1.92E-05 | -33.72950369 |
| chr10 | 127326857 | 127326857 | - | 0        | 0        | -38.72979222 |
| chr10 | 127326876 | 127326876 | + | 0        | 0        | -28.57368006 |
| chr10 | 127326877 | 127326877 | - | 0        | 0        | -33.32631039 |
| chr10 | 127326897 | 127326897 | + | 0        | 0        | -37.66776011 |
| chr10 | 127326898 | 127326898 | - | 0        | 0        | -40.10333277 |
| chr10 | 127326904 | 127326904 | + | 0        | 0        | -26.4177118  |
| chr10 | 127326905 | 127326905 | - | 0        | 0        | -29.00710558 |
| chr10 | 127326912 | 127326912 | - | 0        | 0        | -39.65161367 |
| chr10 | 127326917 | 127326917 | + | 0        | 0        | -42.47978712 |
| chr10 | 127326920 | 127326920 | + | 0        | 0        | -41.13653423 |
| chr10 | 127326921 | 127326921 | - | 0        | 0        | -42.32242038 |
| chr10 | 127326929 | 127326929 | + | 0        | 0        | -42.22485221 |
| chr10 | 127326930 | 127326930 | - | 0        | 0        | -45.76668436 |
| chr10 | 127326938 | 127326938 | + | 0        | 0        | -43.75585378 |
| chr10 | 127326939 | 127326939 | - | 0        | 0        | -44.20499272 |
| chr10 | 127326953 | 127326953 | + | 0        | 0        | -36.79721123 |
| chr10 | 127326954 | 127326954 | - | 0        | 0        | -41.21109388 |
| chr10 | 127326965 | 127326965 | - | 0        | 0        | -34.88755242 |
| chr10 | 127326970 | 127326970 | + | 0        | 0        | -26.26910135 |
| chr10 | 127326971 | 127326971 | - | 0        | 0        | -39.14626622 |
| chr10 | 127326990 | 127326990 | + | 0        | 0        | -35.63546288 |
| chr10 | 127326991 | 127326991 | - | 0        | 0        | -42.97951319 |
| chr10 | 127327002 | 127327002 | + | 0        | 0        | -32.97562706 |
| chr10 | 127327003 | 127327003 | - | 0        | 0        | -41.4913593  |
| chr10 | 127327018 | 127327018 | + | 0        | 0        | -34.87271379 |
| chr10 | 127327019 | 127327019 | - | 0        | 0        | -41.23718806 |
| chr10 | 127327024 | 127327024 | - | 0        | 0        | -39.96543169 |
| chr10 | 127327029 | 127327029 | - | 0        | 0        | -37.99019608 |
| chr10 | 127327907 | 127327907 | - | 0        | 0        | -34.26477894 |
| chr10 | 127491505 | 127491505 | - | 0        | 0        | -32.47923248 |
| chr10 | 127524542 | 127524542 | + | 1.09E-08 | 3.12E-07 | -27.84994698 |
| chr10 | 127524785 | 127524785 | - | 3.64E-09 | 1.11E-07 | -33.0117724  |
| chr10 | 127588141 | 127588141 | + | 0        | 0        | -26.85171386 |
| chr10 | 127588142 | 127588142 | - | 0        | 0        | -32.03182595 |
| chr10 | 127588165 | 127588165 | + | 0        | 0        | -34.43624636 |
| chr10 | 127588166 | 127588166 | - | 0        | 0        | -28.46695558 |

|       |           |           |   |            |            |              |
|-------|-----------|-----------|---|------------|------------|--------------|
| chr10 | 127614025 | 127614025 | + | 7.54E-13   | 3.52E-11   | -28.74945023 |
| chr10 | 127614446 | 127614446 | + | 2.01E-07   | 4.69E-06   | -27.09284627 |
| chr10 | 127620224 | 127620224 | - | 0          | 0          | -45.17812479 |
| chr10 | 127620240 | 127620240 | - | 0          | 0          | -34.07471264 |
| chr10 | 127661678 | 127661678 | - | 3.00E-05   | 0.00043983 | -32.13307241 |
| chr10 | 127661702 | 127661702 | + | 0          | 0          | -25.74080052 |
| chr10 | 127661713 | 127661713 | + | 0          | 0          | -28.88639907 |
| chr10 | 127749503 | 127749503 | + | 0          | 0          | -33.25594406 |
| chr10 | 127749644 | 127749644 | - | 0          | 0          | -36.57603223 |
| chr10 | 127749661 | 127749661 | - | 0          | 0          | -40.52664656 |
| chr10 | 127750362 | 127750362 | + | 0          | 0          | -34.05141115 |
| chr10 | 127750363 | 127750363 | - | 2.41E-07   | 5.56E-06   | -49.31656643 |
| chr10 | 127750390 | 127750390 | + | 0          | 0          | -32.48369887 |
| chr10 | 128123445 | 128123445 | - | 7.61E-09   | 2.22E-07   | -45.14464713 |
| chr10 | 128524029 | 128524029 | + | 1.98E-11   | 7.97E-10   | -25.45685377 |
| chr10 | 128584742 | 128584742 | + | 0          | 0          | -30.42206916 |
| chr10 | 128645290 | 128645290 | - | 0          | 0          | -37.07409018 |
| chr10 | 128645314 | 128645314 | - | 0          | 0          | -30.70601919 |
| chr10 | 128737439 | 128737439 | + | 0          | 0          | -25.08157451 |
| chr10 | 128737683 | 128737683 | - | 0          | 0          | -44.25794677 |
| chr10 | 129389939 | 129389939 | + | 8.07E-05   | 0.00104682 | -26.35658915 |
| chr11 | 3193177   | 3193177   | + | 0.00011226 | 0.00139274 | -27.3993808  |
| chr11 | 3193187   | 3193187   | + | 7.48E-06   | 0.00012754 | -31.17647059 |
| chr11 | 3193782   | 3193782   | - | 0.00018227 | 0.0021168  | -34.09836066 |
| chr11 | 3353319   | 3353319   | - | 0          | 0          | -27.20573736 |
| chr11 | 3453505   | 3453505   | + | 0          | 0          | -25.76895492 |
| chr11 | 3495628   | 3495628   | - | 3.33E-16   | 2.11E-14   | -39.49918636 |
| chr11 | 3608555   | 3608555   | - | 3.35E-12   | 1.47E-10   | -27.28619396 |
| chr11 | 3912593   | 3912593   | - | 4.44E-16   | 2.79E-14   | -27.77757321 |
| chr11 | 3913050   | 3913050   | + | 4.55E-15   | 2.63E-13   | -25.11391774 |
| chr11 | 4218838   | 4218838   | - | 0.00016267 | 0.00191953 | -37.62626263 |
| chr11 | 4232775   | 4232775   | - | 2.32E-06   | 4.44E-05   | -29.62767561 |
| chr11 | 4267440   | 4267440   | - | 0          | 0          | -29.88367316 |
| chr11 | 4308425   | 4308425   | + | 0          | 0          | -31.67287978 |
| chr11 | 4308520   | 4308520   | - | 0          | 0          | -37.95854694 |
| chr11 | 4308642   | 4308642   | - | 0          | 0          | -37.65019535 |
| chr11 | 4308674   | 4308674   | - | 0          | 0          | -27.08651422 |
| chr11 | 4441132   | 4441132   | - | 0          | 0          | -26.29295772 |
| chr11 | 4620262   | 4620262   | + | 4.70E-07   | 1.03E-05   | -25.57925896 |
| chr11 | 4949351   | 4949351   | + | 7.27E-06   | 0.00012423 | -26.4047619  |
| chr11 | 4949361   | 4949361   | + | 2.42E-05   | 0.0003637  | -25.28397566 |

|       |          |          |   |            |            |              |
|-------|----------|----------|---|------------|------------|--------------|
| chr11 | 4949374  | 4949374  | + | 2.90E-06   | 5.44E-05   | -27.48184019 |
| chr11 | 4949384  | 4949384  | + | 1.05E-09   | 3.44E-08   | -31.24078986 |
| chr11 | 4949395  | 4949395  | + | 5.57E-09   | 1.66E-07   | -28.42130751 |
| chr11 | 4954035  | 4954035  | + | 1.20E-14   | 6.65E-13   | -43.65203762 |
| chr11 | 4954154  | 4954154  | + | 0          | 0          | -41.1328976  |
| chr11 | 4954155  | 4954155  | - | 0          | 0          | -37.13847942 |
| chr11 | 4954184  | 4954184  | + | 0          | 0          | -48.64111498 |
| chr11 | 4954185  | 4954185  | - | 0          | 0          | -46.73225468 |
| chr11 | 4954188  | 4954188  | - | 0          | 0          | -39.43439339 |
| chr11 | 5056504  | 5056504  | + | 4.33E-14   | 2.28E-12   | -31.14861329 |
| chr11 | 5056507  | 5056507  | + | 0          | 0          | -43.3396387  |
| chr11 | 5056508  | 5056508  | - | 0          | 0          | -45.98039216 |
| chr11 | 5056513  | 5056513  | + | 0          | 0          | -27.68679162 |
| chr11 | 5056543  | 5056543  | - | 3.47E-09   | 1.06E-07   | -31.12491373 |
| chr11 | 5057159  | 5057159  | + | 0          | 0          | -26.47805574 |
| chr11 | 5057530  | 5057530  | + | 0          | 0          | -38.16227746 |
| chr11 | 5057726  | 5057726  | + | 0          | 0          | -29.76576577 |
| chr11 | 5064127  | 5064127  | + | 0          | 0          | -25.80006573 |
| chr11 | 5064137  | 5064137  | + | 0          | 0          | -30.59821775 |
| chr11 | 5064152  | 5064152  | + | 0          | 0          | -34.87924046 |
| chr11 | 5064160  | 5064160  | + | 0          | 0          | -31.14928046 |
| chr11 | 5064238  | 5064238  | + | 0          | 0          | -29.45141774 |
| chr11 | 5064248  | 5064248  | + | 0          | 0          | -28.42351786 |
| chr11 | 5064257  | 5064257  | + | 0          | 0          | -29.55435053 |
| chr11 | 5064298  | 5064298  | - | 0          | 0          | -32.4606701  |
| chr11 | 5064312  | 5064312  | - | 0          | 0          | -38.52994719 |
| chr11 | 5064321  | 5064321  | - | 0          | 0          | -30.80969508 |
| chr11 | 5478467  | 5478467  | - | 0          | 0          | -26.62964569 |
| chr11 | 5708244  | 5708244  | + | 3.66E-13   | 1.76E-11   | -25.19698156 |
| chr11 | 5862991  | 5862991  | - | 0          | 0          | -27.76384746 |
| chr11 | 5972812  | 5972812  | + | 0          | 0          | -27.86317318 |
| chr11 | 5972841  | 5972841  | + | 0          | 0          | -31.73027761 |
| chr11 | 5972842  | 5972842  | - | 0          | 0          | -33.39033651 |
| chr11 | 6388783  | 6388783  | + | 8.07E-05   | 0.00104692 | -40.43040293 |
| chr11 | 6599184  | 6599184  | - | 0          | 0          | -26.29223908 |
| chr11 | 6636372  | 6636372  | - | 7.40E-07   | 1.56E-05   | -27.13775965 |
| chr11 | 8459525  | 8459525  | + | 0          | 0          | -25.58424437 |
| chr11 | 8517863  | 8517863  | + | 0.0007386  | 0.0068796  | -31.37755102 |
| chr11 | 8625000  | 8625000  | - | 3.11E-09   | 9.59E-08   | -26.15257048 |
| chr11 | 11529118 | 11529118 | - | 1.26E-09   | 4.12E-08   | -27.50743009 |
| chr11 | 11656677 | 11656677 | - | 0.00017507 | 0.00204481 | -30.57625435 |

|       |          |          |   |            |            |              |
|-------|----------|----------|---|------------|------------|--------------|
| chr11 | 11685136 | 11685136 | + | 8.62E-06   | 0.00014492 | -30.96406661 |
| chr11 | 11831891 | 11831891 | + | 1.82E-08   | 5.02E-07   | -30.79777365 |
| chr11 | 11831897 | 11831897 | + | 0          | 0          | -44.4634628  |
| chr11 | 11868016 | 11868016 | + | 0.00019743 | 0.0022661  | -26.22554176 |
| chr11 | 12158554 | 12158554 | - | 0.00050993 | 0.0050573  | 42.63285024  |
| chr11 | 13001481 | 13001481 | + | 0.00078565 | 0.00724108 | -26.28032345 |
| chr11 | 18122765 | 18122765 | - | 1.46E-05   | 0.00023206 | -30.81294786 |
| chr11 | 19103318 | 19103318 | - | 0.00019717 | 0.00226354 | -27.34553776 |
| chr11 | 19103329 | 19103329 | - | 5.81E-07   | 1.25E-05   | -47.79897285 |
| chr11 | 19475667 | 19475667 | - | 0          | 0          | -33.98314121 |
| chr11 | 19531365 | 19531365 | + | 0          | 0          | -25.19379671 |
| chr11 | 19531449 | 19531449 | + | 0          | 0          | -38.83314753 |
| chr11 | 19531450 | 19531450 | - | 0          | 0          | -29.45441006 |
| chr11 | 19531520 | 19531520 | + | 0          | 0          | -37.68732655 |
| chr11 | 19828251 | 19828251 | - | 0          | 0          | -42.1441367  |
| chr11 | 19828254 | 19828254 | - | 0          | 0          | -30.63130556 |
| chr11 | 19965198 | 19965198 | + | 0          | 0          | -40.8330178  |
| chr11 | 19965369 | 19965369 | + | 0          | 0          | -34.12977403 |
| chr11 | 19965392 | 19965392 | + | 0          | 0          | -28.19132547 |
| chr11 | 20400503 | 20400503 | - | 0          | 0          | -30.36708861 |
| chr11 | 20456558 | 20456558 | + | 0          | 0          | -25.97968869 |
| chr11 | 20469542 | 20469542 | + | 0          | 0          | -32.01764123 |
| chr11 | 20580914 | 20580914 | + | 0          | 0          | -25.47709924 |
| chr11 | 21191681 | 21191681 | - | 4.14E-05   | 0.00058517 | 44.82758621  |
| chr11 | 21999922 | 21999922 | - | 0          | 0          | -29.91169652 |
| chr11 | 22005330 | 22005330 | + | 0          | 0          | -28.56594085 |
| chr11 | 22005359 | 22005359 | - | 0          | 0          | -30.86720173 |
| chr11 | 22005391 | 22005391 | - | 0          | 0          | -26.86950062 |
| chr11 | 22005540 | 22005540 | + | 0          | 0          | -38.65248227 |
| chr11 | 22005541 | 22005541 | - | 0          | 0          | -42.50980392 |
| chr11 | 22005554 | 22005554 | + | 5.55E-16   | 3.46E-14   | -28.59499655 |
| chr11 | 22007267 | 22007267 | + | 0          | 0          | -35.2762542  |
| chr11 | 22007268 | 22007268 | - | 0          | 0          | -44.05212679 |
| chr11 | 22007301 | 22007301 | - | 0          | 0          | -26.83309806 |
| chr11 | 22007310 | 22007310 | - | 0          | 0          | -33.8217195  |
| chr11 | 22629904 | 22629904 | + | 1.71E-13   | 8.49E-12   | -54.28234678 |
| chr11 | 22629949 | 22629949 | + | 1.96E-09   | 6.21E-08   | -43.33333333 |
| chr11 | 24131277 | 24131277 | - | 4.37E-14   | 2.31E-12   | -33.44537815 |
| chr11 | 24131291 | 24131291 | + | 8.94E-12   | 3.74E-10   | -26.96741855 |
| chr11 | 24282402 | 24282402 | + | 3.62E-09   | 1.11E-07   | -26.06100796 |
| chr11 | 24282407 | 24282407 | + | 4.65E-11   | 1.80E-09   | -27.5        |

|       |          |          |   |            |            |              |
|-------|----------|----------|---|------------|------------|--------------|
| chr11 | 24282513 | 24282513 | - | 0          | 0          | -27.66924494 |
| chr11 | 24282545 | 24282545 | - | 0          | 0          | -38.41371389 |
| chr11 | 25270130 | 25270130 | - | 0          | 0          | -28.83005641 |
| chr11 | 31560724 | 31560724 | + | 0.00036107 | 0.00378555 | -30          |
| chr11 | 31965886 | 31965886 | + | 2.89E-15   | 1.70E-13   | -26.30107813 |
| chr11 | 31965913 | 31965913 | + | 1.11E-16   | 7.26E-15   | -25.57728388 |
| chr11 | 32161578 | 32161578 | - | 2.90E-11   | 1.15E-09   | -31.63756318 |
| chr11 | 32161593 | 32161593 | - | 2.33E-15   | 1.38E-13   | -39.8938992  |
| chr11 | 32161699 | 32161699 | - | 0          | 0          | -29.50819147 |
| chr11 | 32199112 | 32199112 | + | 9.89E-09   | 2.84E-07   | -27.61395028 |
| chr11 | 32199224 | 32199224 | - | 0          | 0          | -32.80537197 |
| chr11 | 32277751 | 32277751 | - | 2.93E-14   | 1.57E-12   | -26.2707283  |
| chr11 | 32278575 | 32278575 | - | 0          | 0          | -25.11646031 |
| chr11 | 32531807 | 32531807 | + | 0          | 0          | -37.20762562 |
| chr11 | 32564866 | 32564866 | + | 2.33E-15   | 1.38E-13   | -30.33986202 |
| chr11 | 33824610 | 33824610 | + | 6.74E-05   | 0.00089535 | 27.30138714  |
| chr11 | 33868979 | 33868979 | - | 0.00033549 | 0.00355818 | 50.66666667  |
| chr11 | 33963179 | 33963179 | + | 9.42E-12   | 3.93E-10   | -25.26724395 |
| chr11 | 34119041 | 34119041 | - | 1.03E-06   | 2.11E-05   | -34.50441818 |
| chr11 | 36000059 | 36000059 | - | 2.40E-13   | 1.18E-11   | -27.81538462 |
| chr11 | 43344839 | 43344839 | + | 0          | 0          | -25.89445119 |
| chr11 | 43618109 | 43618109 | + | 0          | 0          | -27.5880201  |
| chr11 | 43626832 | 43626832 | + | 1.77E-07   | 4.17E-06   | -36.48757017 |
| chr11 | 43626842 | 43626842 | + | 7.79E-10   | 2.60E-08   | -38.20658662 |
| chr11 | 43626972 | 43626972 | - | 4.76E-12   | 2.05E-10   | -35.20979021 |
| chr11 | 43626987 | 43626987 | - | 1.93E-14   | 1.05E-12   | -39.0323163  |
| chr11 | 43775876 | 43775876 | + | 7.92E-12   | 3.33E-10   | -29.34399336 |
| chr11 | 43925889 | 43925889 | - | 2.40E-06   | 4.57E-05   | -32.87224325 |
| chr11 | 44469263 | 44469263 | - | 2.37E-12   | 1.05E-10   | -26.96099082 |
| chr11 | 44685949 | 44685949 | + | 2.48E-12   | 1.10E-10   | -34.70579502 |
| chr11 | 44685970 | 44685970 | + | 8.79E-13   | 4.08E-11   | -37.92899408 |
| chr11 | 44685996 | 44685996 | + | 3.62E-07   | 8.08E-06   | -29.02148664 |
| chr11 | 44893674 | 44893674 | - | 1.96E-06   | 3.80E-05   | 25.03607504  |
| chr11 | 45889840 | 45889840 | + | 1.06E-05   | 0.00017494 | -25.59048428 |
| chr11 | 45979959 | 45979959 | - | 2.28E-10   | 8.16E-09   | -31.40507519 |
| chr11 | 45979961 | 45979961 | - | 6.25E-08   | 1.59E-06   | -26.33859554 |
| chr11 | 45980150 | 45980150 | + | 5.55E-16   | 3.46E-14   | -28.76574883 |
| chr11 | 46041296 | 46041296 | + | 0          | 0          | -28.11225377 |
| chr11 | 46052344 | 46052344 | + | 0.00014486 | 0.00173696 | -33.70336109 |
| chr11 | 47186371 | 47186371 | - | 6.62E-05   | 0.00088158 | -28.9800995  |
| chr11 | 48791434 | 48791434 | - | 2.82E-07   | 6.42E-06   | -42.22222222 |



|       |          |          |   |            |            |              |
|-------|----------|----------|---|------------|------------|--------------|
| chr11 | 48837147 | 48837147 | + | 4.55E-15   | 2.63E-13   | -31.57858241 |
| chr11 | 48842229 | 48842229 | + | 0.00078323 | 0.00722267 | -34.88612836 |
| chr11 | 48845619 | 48845619 | - | 0          | 0          | -36.34888204 |
| chr11 | 48849704 | 48849704 | + | 2.92E-07   | 6.64E-06   | -32.21153846 |
| chr11 | 48849708 | 48849708 | + | 3.44E-06   | 6.33E-05   | -26.4957265  |
| chr11 | 48849711 | 48849711 | + | 2.74E-05   | 0.00040674 | -25.3959276  |
| chr11 | 48849963 | 48849963 | - | 2.59E-07   | 5.94E-06   | -25.49497411 |
| chr11 | 49776856 | 49776856 | - | 3.22E-06   | 5.97E-05   | 30.92892329  |
| chr11 | 49793218 | 49793218 | + | 0          | 0          | -43.11751018 |
| chr11 | 49793230 | 49793230 | + | 0          | 0          | -30.68479685 |
| chr11 | 49793247 | 49793247 | + | 0          | 0          | -49.47203959 |
| chr11 | 49793258 | 49793258 | + | 0          | 0          | -40.90811078 |
| chr11 | 49793261 | 49793261 | + | 0          | 0          | -39.00965997 |
| chr11 | 49793329 | 49793329 | - | 0          | 0          | -46.9772414  |
| chr11 | 49793341 | 49793341 | - | 0          | 0          | -48.04930034 |
| chr11 | 49793353 | 49793353 | - | 0          | 0          | -44.86537026 |
| chr11 | 49793377 | 49793377 | + | 0          | 0          | -38.43876372 |
| chr11 | 49793378 | 49793378 | - | 0          | 0          | -42.08074411 |
| chr11 | 49793382 | 49793382 | + | 0          | 0          | -40.93299817 |
| chr11 | 49793438 | 49793438 | - | 0          | 0          | -32.67778403 |
| chr11 | 49795021 | 49795021 | + | 1.11E-09   | 3.65E-08   | -33.48877878 |
| chr11 | 50371018 | 50371018 | - | 1.70E-09   | 5.44E-08   | -39.5140665  |
| chr11 | 50604355 | 50604355 | + | 2.16E-07   | 5.02E-06   | 27.30191257  |
| chr11 | 51254657 | 51254657 | - | 0          | 0          | -26.46308323 |
| chr11 | 51304240 | 51304240 | + | 8.13E-05   | 0.00105384 | -29.58074534 |
| chr11 | 51572363 | 51572363 | - | 0          | 0          | -41.77520559 |
| chr11 | 51629015 | 51629015 | - | 1.87E-09   | 5.93E-08   | -29.84596614 |
| chr11 | 51629055 | 51629055 | - | 6.00E-15   | 3.43E-13   | -41.73780488 |
| chr11 | 51646932 | 51646932 | + | 0          | 0          | -39.11344234 |
| chr11 | 51646961 | 51646961 | + | 0          | 0          | -39.40990695 |
| chr11 | 51646964 | 51646964 | + | 0          | 0          | -43.11109271 |
| chr11 | 51647002 | 51647002 | - | 0          | 0          | -46.90431783 |
| chr11 | 51647045 | 51647045 | + | 0          | 0          | -43.48487665 |
| chr11 | 51647046 | 51647046 | - | 0          | 0          | -38.15287492 |
| chr11 | 51647127 | 51647127 | - | 0          | 0          | -48.77287689 |
| chr11 | 51647157 | 51647157 | - | 0          | 0          | -26.25902993 |
| chr11 | 51816128 | 51816128 | - | 0          | 0          | -37.98657718 |
| chr11 | 51854931 | 51854931 | + | 3.33E-16   | 2.11E-14   | -30.43037146 |
| chr11 | 51854957 | 51854957 | + | 0          | 0          | -28.93573861 |
| chr11 | 51920032 | 51920032 | - | 2.41E-12   | 1.07E-10   | -26.85164298 |
| chr11 | 52001579 | 52001579 | + | 0          | 0          | -25.56028267 |

|       |          |          |   |            |            |              |
|-------|----------|----------|---|------------|------------|--------------|
| chr11 | 52032617 | 52032617 | + | 0          | 0          | -29.78294784 |
| chr11 | 52282572 | 52282572 | - | 0          | 0          | -35.85815918 |
| chr11 | 52283605 | 52283605 | - | 0          | 0          | -25.48046947 |
| chr11 | 52284118 | 52284118 | + | 5.91E-06   | 0.00010327 | -27.51140283 |
| chr11 | 52284777 | 52284777 | - | 1.29E-12   | 5.91E-11   | -32.87526427 |
| chr11 | 52284789 | 52284789 | - | 5.88E-15   | 3.37E-13   | -37.52030578 |
| chr11 | 52284800 | 52284800 | - | 1.11E-16   | 7.26E-15   | -37.95588127 |
| chr11 | 52286548 | 52286548 | - | 0          | 0          | -49.24742986 |
| chr11 | 52341658 | 52341658 | - | 0          | 0          | -47.705587   |
| chr11 | 52341700 | 52341700 | + | 0          | 0          | -50.90027229 |
| chr11 | 52341701 | 52341701 | - | 0          | 0          | -47.08956672 |
| chr11 | 52341718 | 52341718 | + | 0          | 0          | -48.03861243 |
| chr11 | 53439346 | 53439346 | - | 3.33E-16   | 2.11E-14   | -29.15177706 |
| chr11 | 53439375 | 53439375 | + | 5.60E-07   | 1.21E-05   | -25.47287466 |
| chr11 | 53439376 | 53439376 | - | 7.84E-14   | 4.03E-12   | -25.06458333 |
| chr11 | 53439405 | 53439405 | + | 0          | 0          | -30.57214162 |
| chr11 | 53439406 | 53439406 | - | 1.61E-07   | 3.83E-06   | -30.09668961 |
| chr11 | 53439425 | 53439425 | + | 0          | 0          | -26.4096602  |
| chr11 | 53466534 | 53466534 | + | 0          | 0          | -27.10382312 |
| chr11 | 53466555 | 53466555 | + | 0          | 0          | -28.91449053 |
| chr11 | 53466947 | 53466947 | - | 0          | 0          | -33.99788285 |
| chr11 | 53466968 | 53466968 | - | 1.19E-13   | 5.99E-12   | -26.94404897 |
| chr11 | 53478667 | 53478667 | + | 0          | 0          | -30.48780488 |
| chr11 | 53519359 | 53519359 | + | 0          | 0          | -25.50968142 |
| chr11 | 53519425 | 53519425 | + | 0          | 0          | -42.91572398 |
| chr11 | 53608364 | 53608364 | + | 0.00021861 | 0.00247263 | -40.95238095 |
| chr11 | 53637230 | 53637230 | + | 0          | 0          | -49.91676789 |
| chr11 | 53637457 | 53637457 | - | 7.94E-07   | 1.66E-05   | -46.03773585 |
| chr11 | 53737591 | 53737591 | + | 3.20E-06   | 5.93E-05   | -28.95166353 |
| chr11 | 53809704 | 53809704 | + | 3.17E-11   | 1.25E-09   | -26.76269489 |
| chr11 | 54080620 | 54080620 | + | 0          | 0          | -32.31456954 |
| chr11 | 54080658 | 54080658 | + | 0          | 0          | -41.8410596  |
| chr11 | 54798571 | 54798571 | + | 7.69E-11   | 2.90E-09   | -28.0383017  |
| chr11 | 55176896 | 55176896 | + | 2.86E-09   | 8.86E-08   | -27.85654712 |
| chr11 | 55208735 | 55208735 | + | 2.26E-07   | 5.24E-06   | -25.07646014 |
| chr11 | 55208877 | 55208877 | - | 0          | 0          | -25.55366065 |
| chr11 | 55314397 | 55314397 | - | 2.50E-11   | 9.97E-10   | -34.39115278 |
| chr11 | 57454647 | 57454647 | - | 0.00100317 | 0.00885394 | 26.15943225  |
| chr11 | 57559292 | 57559292 | + | 0          | 0          | -26.84875228 |
| chr11 | 57592953 | 57592953 | + | 9.82E-12   | 4.09E-10   | -27.7175056  |
| chr11 | 57600772 | 57600772 | - | 8.87E-08   | 2.20E-06   | -25.705986   |

|       |          |          |   |          |            |              |
|-------|----------|----------|---|----------|------------|--------------|
| chr11 | 57651380 | 57651380 | - | 5.27E-10 | 1.80E-08   | -38.40811966 |
| chr11 | 57651419 | 57651419 | - | 1.02E-07 | 2.50E-06   | -34.1540404  |
| chr11 | 57670970 | 57670970 | - | 3.57E-12 | 1.56E-10   | -33.78496503 |
| chr11 | 57826863 | 57826863 | + | 0        | 0          | -32.20080063 |
| chr11 | 57826973 | 57826973 | + | 0        | 0          | -40.5304328  |
| chr11 | 57826974 | 57826974 | - | 0        | 0          | -43.62815133 |
| chr11 | 57827308 | 57827308 | + | 5.56E-09 | 1.66E-07   | -25.61688312 |
| chr11 | 57829485 | 57829485 | - | 0        | 0          | -29.74286258 |
| chr11 | 57829618 | 57829618 | - | 0        | 0          | -29.79178385 |
| chr11 | 57829640 | 57829640 | + | 8.31E-06 | 0.00014007 | -29.58881579 |
| chr11 | 57829641 | 57829641 | - | 0        | 0          | -33.52199022 |
| chr11 | 57829645 | 57829645 | + | 6.06E-13 | 2.86E-11   | -55.41888298 |
| chr11 | 57829664 | 57829664 | + | 3.61E-14 | 1.92E-12   | -56.60287081 |
| chr11 | 57829694 | 57829694 | + | 0        | 0          | -45.0591747  |
| chr11 | 57829740 | 57829740 | - | 0        | 0          | -34.69888956 |
| chr11 | 57829775 | 57829775 | - | 0        | 0          | -44.63753335 |
| chr11 | 57829801 | 57829801 | + | 0        | 0          | -28.76571897 |
| chr11 | 57832051 | 57832051 | - | 0        | 0          | -31.01950503 |
| chr11 | 57832074 | 57832074 | - | 0        | 0          | -34.45714882 |
| chr11 | 57832837 | 57832837 | + | 0        | 0          | -34.32515237 |
| chr11 | 57832850 | 57832850 | + | 0        | 0          | -26.47876299 |
| chr11 | 57832851 | 57832851 | - | 0        | 0          | -25.92972973 |
| chr11 | 57840534 | 57840534 | - | 0        | 0          | -25.9565495  |
| chr11 | 57850458 | 57850458 | - | 7.68E-05 | 0.00100339 | -28.2109383  |
| chr11 | 57850474 | 57850474 | - | 2.60E-06 | 4.92E-05   | -31.22389307 |
| chr11 | 57929525 | 57929525 | + | 6.14E-08 | 1.56E-06   | -36.6350847  |
| chr11 | 57929721 | 57929721 | - | 1.84E-05 | 0.00028458 | -37.5862069  |
| chr11 | 57929777 | 57929777 | + | 0        | 0          | -39.64401294 |
| chr11 | 57929778 | 57929778 | - | 1.85E-12 | 8.33E-11   | -48.86015326 |
| chr11 | 57929781 | 57929781 | + | 0        | 0          | -35.27880391 |
| chr11 | 57929782 | 57929782 | - | 1.33E-14 | 7.36E-13   | -37.89575169 |
| chr11 | 57929789 | 57929789 | + | 0        | 0          | -30.01406752 |
| chr11 | 57929790 | 57929790 | - | 2.05E-11 | 8.23E-10   | -28.31733484 |
| chr11 | 57929799 | 57929799 | + | 0        | 0          | -41.4804184  |
| chr11 | 57929800 | 57929800 | - | 0        | 0          | -44.63579898 |
| chr11 | 57929814 | 57929814 | + | 0        | 0          | -38.73120069 |
| chr11 | 57929815 | 57929815 | - | 8.45E-14 | 4.34E-12   | -41.71401515 |
| chr11 | 57929846 | 57929846 | + | 0        | 0          | -46.42055329 |
| chr11 | 57929847 | 57929847 | - | 0        | 0          | -51.51747991 |
| chr11 | 57929876 | 57929876 | + | 9.99E-15 | 5.59E-13   | -33.41276218 |
| chr11 | 57929877 | 57929877 | - | 0        | 0          | -27.57950866 |

|       |          |          |   |            |            |              |
|-------|----------|----------|---|------------|------------|--------------|
| chr11 | 57929885 | 57929885 | + | 0          | 0          | -50.44655163 |
| chr11 | 57963714 | 57963714 | - | 9.80E-08   | 2.41E-06   | -37.97567236 |
| chr11 | 58999391 | 58999391 | + | 5.84E-09   | 1.73E-07   | -28.94736842 |
| chr11 | 58999432 | 58999432 | + | 7.60E-11   | 2.87E-09   | -35.52631579 |
| chr11 | 59176426 | 59176426 | - | 9.67E-05   | 0.00122481 | 40           |
| chr11 | 59274921 | 59274921 | - | 0          | 0          | -28.72931876 |
| chr11 | 59275425 | 59275425 | - | 4.91E-05   | 0.00067959 | -27.64343291 |
| chr11 | 59284326 | 59284326 | + | 0          | 0          | -25.08088242 |
| chr11 | 59284327 | 59284327 | - | 0          | 0          | -30.611834   |
| chr11 | 59284352 | 59284352 | - | 0          | 0          | -27.95225401 |
| chr11 | 59317320 | 59317320 | + | 0          | 0          | -27.5982218  |
| chr11 | 59505120 | 59505120 | + | 3.60E-05   | 0.0005161  | -32.5017819  |
| chr11 | 59505140 | 59505140 | + | 8.29E-07   | 1.73E-05   | -39.7828985  |
| chr11 | 59507100 | 59507100 | + | 0          | 0          | -38.73086664 |
| chr11 | 59892519 | 59892519 | - | 1.32E-07   | 3.18E-06   | -27.59469697 |
| chr11 | 59921535 | 59921535 | + | 0          | 0          | -30.67455243 |
| chr11 | 59921536 | 59921536 | - | 0          | 0          | -26.17768595 |
| chr11 | 59934249 | 59934249 | - | 0          | 0          | -26.34257826 |
| chr11 | 60141426 | 60141426 | - | 0          | 0          | -26.18393975 |
| chr11 | 60141437 | 60141437 | - | 0          | 0          | -25.32941125 |
| chr11 | 60185012 | 60185012 | + | 3.54E-07   | 7.91E-06   | -32.74312896 |
| chr11 | 60185037 | 60185037 | + | 8.70E-06   | 0.000146   | -30.76607387 |
| chr11 | 60185188 | 60185188 | - | 0          | 0          | -42.47127455 |
| chr11 | 60230114 | 60230114 | - | 5.33E-15   | 3.06E-13   | -26.29964506 |
| chr11 | 60366606 | 60366606 | + | 0          | 0          | -27.14454673 |
| chr11 | 60478259 | 60478259 | + | 2.67E-05   | 0.00039639 | -30.2827381  |
| chr11 | 60575979 | 60575979 | - | 0          | 0          | -26.51137006 |
| chr11 | 60575998 | 60575998 | - | 0          | 0          | -27.12141883 |
| chr11 | 60576016 | 60576016 | - | 0          | 0          | -31.64566543 |
| chr11 | 60933976 | 60933976 | - | 4.66E-15   | 2.69E-13   | -28.21238461 |
| chr11 | 61129418 | 61129418 | - | 2.42E-14   | 1.31E-12   | -26.2108026  |
| chr11 | 61146977 | 61146977 | + | 4.85E-09   | 1.46E-07   | -27.84109411 |
| chr11 | 61146984 | 61146984 | + | 2.89E-15   | 1.70E-13   | -37.35768501 |
| chr11 | 61147010 | 61147010 | + | 1.25E-09   | 4.07E-08   | -28.49291232 |
| chr11 | 61147017 | 61147017 | + | 5.50E-11   | 2.11E-09   | -31.20456227 |
| chr11 | 61147128 | 61147128 | + | 0          | 0          | -29.63407181 |
| chr11 | 61147235 | 61147235 | - | 0          | 0          | -25.62831785 |
| chr11 | 61147242 | 61147242 | - | 0          | 0          | -26.93089984 |
| chr11 | 61147273 | 61147273 | + | 0          | 0          | -25.66603102 |
| chr11 | 61147632 | 61147632 | + | 0          | 0          | -25.59093776 |
| chr11 | 61147724 | 61147724 | - | 0.00034628 | 0.00365416 | -30.96655978 |

|       |          |          |   |            |            |              |
|-------|----------|----------|---|------------|------------|--------------|
| chr11 | 61147738 | 61147738 | - | 7.06E-06   | 0.00012108 | -38.1773399  |
| chr11 | 61161335 | 61161335 | + | 0          | 0          | -28.1519379  |
| chr11 | 61484475 | 61484475 | - | 0          | 0          | -28.63736526 |
| chr11 | 61484494 | 61484494 | - | 1.32E-12   | 6.01E-11   | -25.9843813  |
| chr11 | 61484707 | 61484707 | - | 5.51E-05   | 0.00075085 | -32.32258065 |
| chr11 | 61505591 | 61505591 | + | 0.00056652 | 0.00552298 | -26.44110276 |
| chr11 | 61658321 | 61658321 | - | 1.79E-13   | 8.90E-12   | -26.25072948 |
| chr11 | 61674472 | 61674472 | - | 7.45E-05   | 0.00097667 | -26.27820159 |
| chr11 | 61674689 | 61674689 | + | 4.69E-07   | 1.03E-05   | -34.55670543 |
| chr11 | 61684687 | 61684687 | + | 0          | 0          | -33.61862631 |
| chr11 | 61684689 | 61684689 | + | 0          | 0          | -34.3949813  |
| chr11 | 61684713 | 61684713 | - | 0          | 0          | -30.45698925 |
| chr11 | 61684728 | 61684728 | - | 0          | 0          | -32.27779032 |
| chr11 | 61684784 | 61684784 | + | 0          | 0          | -44.34738651 |
| chr11 | 61684789 | 61684789 | + | 1.81E-07   | 4.26E-06   | -25.42754736 |
| chr11 | 61684792 | 61684792 | + | 4.25E-09   | 1.29E-07   | -28.46830452 |
| chr11 | 61684797 | 61684797 | + | 1.48E-10   | 5.39E-09   | -30.9998989  |
| chr11 | 61684969 | 61684969 | + | 0          | 0          | -27.87814139 |
| chr11 | 61684970 | 61684970 | - | 4.02E-13   | 1.93E-11   | -29.90132536 |
| chr11 | 61684977 | 61684977 | + | 0          | 0          | -25.3141392  |
| chr11 | 61951977 | 61951977 | - | 5.55E-16   | 3.46E-14   | -32.11383909 |
| chr11 | 62565940 | 62565940 | + | 3.06E-14   | 1.64E-12   | -30.89352825 |
| chr11 | 62636241 | 62636241 | - | 0          | 0          | -30.3879977  |
| chr11 | 63412172 | 63412172 | + | 0          | 0          | -34.81691919 |
| chr11 | 63412173 | 63412173 | - | 0          | 0          | -36.79872515 |
| chr11 | 63412211 | 63412211 | - | 0          | 0          | -35.00828994 |
| chr11 | 63412273 | 63412273 | + | 0          | 0          | -40.52938808 |
| chr11 | 63412381 | 63412381 | + | 0          | 0          | -41.77577254 |
| chr11 | 63412382 | 63412382 | - | 0          | 0          | -44.81792717 |
| chr11 | 63412421 | 63412421 | - | 0          | 0          | -35.9834119  |
| chr11 | 63898835 | 63898835 | - | 0          | 0          | -25.70599497 |
| chr11 | 65660331 | 65660331 | + | 1.79E-05   | 0.00027768 | 29.22077922  |
| chr11 | 67456129 | 67456129 | - | 8.27E-11   | 3.11E-09   | -46.10307982 |
| chr11 | 67456140 | 67456140 | - | 0.00025101 | 0.00278179 | -27.64705882 |
| chr11 | 67545260 | 67545260 | + | 0          | 0          | -25.81423646 |
| chr11 | 67545262 | 67545262 | + | 0          | 0          | -25.07142857 |
| chr11 | 67545318 | 67545318 | - | 2.03E-08   | 5.57E-07   | -25.48855388 |
| chr11 | 67675702 | 67675702 | - | 0          | 0          | -26.60075766 |
| chr11 | 68113706 | 68113706 | + | 0.0006435  | 0.00613941 | -26          |
| chr11 | 68145138 | 68145138 | + | 0          | 0          | -41.95921496 |
| chr11 | 68145142 | 68145142 | + | 0          | 0          | -36.22304375 |

|       |          |          |   |            |            |              |
|-------|----------|----------|---|------------|------------|--------------|
| chr11 | 68145288 | 68145288 | - | 3.16E-10   | 1.11E-08   | -35.9984985  |
| chr11 | 68145306 | 68145306 | - | 1.25E-10   | 4.61E-09   | -37.66891892 |
| chr11 | 68145317 | 68145317 | - | 9.85E-12   | 4.10E-10   | -40.97902098 |
| chr11 | 68145784 | 68145784 | + | 0          | 0          | -39.07966746 |
| chr11 | 68145812 | 68145812 | + | 0          | 0          | -52.15345771 |
| chr11 | 68145863 | 68145863 | - | 0          | 0          | -40.54980552 |
| chr11 | 68145880 | 68145880 | + | 0          | 0          | -33.70742788 |
| chr11 | 68145881 | 68145881 | - | 0          | 0          | -33.30190259 |
| chr11 | 68145973 | 68145973 | - | 0          | 0          | -27.23222418 |
| chr11 | 68146003 | 68146003 | - | 0          | 0          | -37.16032722 |
| chr11 | 68189154 | 68189154 | + | 2.44E-13   | 1.20E-11   | -32.49637856 |
| chr11 | 68189189 | 68189189 | + | 2.24E-14   | 1.21E-12   | -35.8529028  |
| chr11 | 68600888 | 68600888 | + | 2.22E-15   | 1.32E-13   | -38.3580705  |
| chr11 | 68601697 | 68601697 | - | 0          | 0          | -37.30189162 |
| chr11 | 68954045 | 68954045 | + | 0          | 0          | -33.14733659 |
| chr11 | 68956775 | 68956775 | + | 0          | 0          | -58.73968913 |
| chr11 | 68956782 | 68956782 | + | 0          | 0          | -59.84902495 |
| chr11 | 68956825 | 68956825 | + | 0          | 0          | -56.6517278  |
| chr11 | 68956913 | 68956913 | - | 0          | 0          | -40.64349956 |
| chr11 | 68956928 | 68956928 | + | 0          | 0          | -31.08238732 |
| chr11 | 68956929 | 68956929 | - | 0          | 0          | -27.74530249 |
| chr11 | 68956974 | 68956974 | - | 0          | 0          | -38.16486829 |
| chr11 | 69026484 | 69026484 | - | 1.19E-14   | 6.60E-13   | -27.30374088 |
| chr11 | 69061263 | 69061263 | + | 3.63E-09   | 1.11E-07   | -32.2761194  |
| chr11 | 69061482 | 69061482 | + | 0          | 0          | -40.97754837 |
| chr11 | 69119840 | 69119840 | + | 0          | 0          | -32.45059193 |
| chr11 | 69119878 | 69119878 | + | 0          | 0          | -26.87309615 |
| chr11 | 69119963 | 69119963 | - | 3.20E-08   | 8.53E-07   | -38.77952756 |
| chr11 | 69119966 | 69119966 | - | 4.76E-07   | 1.04E-05   | -34.48109568 |
| chr11 | 69119996 | 69119996 | - | 8.46E-08   | 2.11E-06   | -36.84260853 |
| chr11 | 69157402 | 69157402 | - | 0.00097926 | 0.00868014 | -33.65384615 |
| chr11 | 69236574 | 69236574 | + | 0          | 0          | -26.18797786 |
| chr11 | 69327281 | 69327281 | + | 1.20E-11   | 4.97E-10   | -27.51929674 |
| chr11 | 69327290 | 69327290 | + | 3.33E-16   | 2.11E-14   | -35.87960387 |
| chr11 | 69327435 | 69327435 | - | 1.80E-07   | 4.25E-06   | -27.92989722 |
| chr11 | 69398210 | 69398210 | + | 0          | 0          | -28.09342854 |
| chr11 | 69398220 | 69398220 | + | 0          | 0          | -32.08269955 |
| chr11 | 69398241 | 69398241 | + | 0          | 0          | -34.86345447 |
| chr11 | 69398251 | 69398251 | - | 0          | 0          | -27.11484848 |
| chr11 | 69398310 | 69398310 | + | 0          | 0          | -29.24675766 |
| chr11 | 69401259 | 69401259 | - | 2.66E-05   | 0.00039579 | -31.00766195 |

|       |          |          |   |            |            |              |
|-------|----------|----------|---|------------|------------|--------------|
| chr11 | 69421825 | 69421825 | - | 3.89E-09   | 1.18E-07   | -36.00985222 |
| chr11 | 69452385 | 69452385 | + | 0          | 0          | -27.57030073 |
| chr11 | 69452393 | 69452393 | + | 0          | 0          | -28.02480339 |
| chr11 | 69471658 | 69471658 | - | 0          | 0          | -25.87624705 |
| chr11 | 69557597 | 69557597 | - | 4.00E-15   | 2.32E-13   | -34.17688535 |
| chr11 | 69622712 | 69622712 | + | 0.00010622 | 0.00132809 | -48.05194805 |
| chr11 | 69652451 | 69652451 | + | 3.19E-13   | 1.55E-11   | -33.49476947 |
| chr11 | 69654857 | 69654857 | - | 0          | 0          | -39.9272953  |
| chr11 | 69655422 | 69655422 | - | 2.98E-11   | 1.18E-09   | -27.23829201 |
| chr11 | 69655432 | 69655432 | - | 5.34E-11   | 2.05E-09   | -29.66875106 |
| chr11 | 69655468 | 69655468 | + | 2.75E-13   | 1.34E-11   | -27.26879522 |
| chr11 | 69655469 | 69655469 | - | 0          | 0          | -38.85149527 |
| chr11 | 69655471 | 69655471 | + | 7.36E-12   | 3.10E-10   | -25.22867863 |
| chr11 | 69655485 | 69655485 | + | 6.24E-14   | 3.24E-12   | -28.38964545 |
| chr11 | 69655500 | 69655500 | + | 0          | 0          | -36.66201117 |
| chr11 | 69655517 | 69655517 | + | 0          | 0          | -36.69445485 |
| chr11 | 69655683 | 69655683 | - | 2.20E-14   | 1.19E-12   | -41.5308642  |
| chr11 | 69655689 | 69655689 | - | 1.62E-12   | 7.33E-11   | -39.44654088 |
| chr11 | 69655698 | 69655698 | - | 6.77E-15   | 3.85E-13   | -42.31481481 |
| chr11 | 69655709 | 69655709 | - | 1.50E-09   | 4.84E-08   | -30.97023404 |
| chr11 | 69655731 | 69655731 | - | 4.37E-05   | 0.00061322 | -25.01087429 |
| chr11 | 69655746 | 69655746 | + | 0.00027235 | 0.00298291 | -32.73657289 |
| chr11 | 69695526 | 69695526 | + | 0          | 0          | -33.41557553 |
| chr11 | 69767751 | 69767751 | + | 6.37E-09   | 1.88E-07   | -33.25170068 |
| chr11 | 69777726 | 69777726 | + | 0          | 0          | -28.57743737 |
| chr11 | 69778056 | 69778056 | - | 0          | 0          | -33.54312534 |
| chr11 | 69778880 | 69778880 | - | 0          | 0          | -26.11231687 |
| chr11 | 69785162 | 69785162 | + | 8.73E-14   | 4.47E-12   | -32.11962858 |
| chr11 | 69801772 | 69801772 | - | 0          | 0          | -31.13255002 |
| chr11 | 69804564 | 69804564 | - | 4.23E-06   | 7.64E-05   | -51.28205128 |
| chr11 | 69804746 | 69804746 | - | 0          | 0          | -37.14933669 |
| chr11 | 69858624 | 69858624 | + | 0          | 0          | -31.85914494 |
| chr11 | 69858641 | 69858641 | + | 0          | 0          | -27.72870718 |
| chr11 | 69858644 | 69858644 | + | 0          | 0          | -30.95989848 |
| chr11 | 69858645 | 69858645 | - | 0          | 0          | -34.20295092 |
| chr11 | 69858662 | 69858662 | + | 0          | 0          | -30.81672348 |
| chr11 | 69858663 | 69858663 | - | 0          | 0          | -35.56445599 |
| chr11 | 69979873 | 69979873 | + | 0          | 0          | -25.82050744 |
| chr11 | 70024324 | 70024324 | + | 1.08E-07   | 2.65E-06   | -30.96482062 |
| chr11 | 70024565 | 70024565 | - | 5.76E-10   | 1.96E-08   | -34.48275862 |
| chr11 | 70024578 | 70024578 | - | 1.41E-11   | 5.77E-10   | -49.66039707 |

|       |          |          |   |          |          |              |
|-------|----------|----------|---|----------|----------|--------------|
| chr11 | 70026456 | 70026456 | - | 2.54E-10 | 9.02E-09 | -33.32380408 |
| chr11 | 70027012 | 70027012 | + | 7.77E-16 | 4.79E-14 | -40.84623323 |
| chr11 | 70029847 | 70029847 | + | 7.77E-16 | 4.79E-14 | -29.807217   |
| chr11 | 70200103 | 70200103 | - | 5.16E-08 | 1.33E-06 | -33.41031149 |
| chr11 | 70215587 | 70215587 | - | 0        | 0        | -34.69692274 |
| chr11 | 70226364 | 70226364 | + | 0        | 0        | -42.23959087 |
| chr11 | 70226404 | 70226404 | + | 0        | 0        | -33.96481146 |
| chr11 | 70226487 | 70226487 | - | 0        | 0        | -31.45574608 |
| chr11 | 70226504 | 70226504 | + | 0        | 0        | -29.7450601  |
| chr11 | 70226505 | 70226505 | - | 0        | 0        | -30.45128205 |
| chr11 | 70226515 | 70226515 | + | 0        | 0        | -32.853819   |
| chr11 | 70226519 | 70226519 | + | 0        | 0        | -32.58905733 |
| chr11 | 70226545 | 70226545 | + | 0        | 0        | -30.20895522 |
| chr11 | 70226546 | 70226546 | - | 0        | 0        | -29.75875706 |
| chr11 | 70226551 | 70226551 | + | 0        | 0        | -30.63019418 |
| chr11 | 70226552 | 70226552 | - | 0        | 0        | -29.72229526 |
| chr11 | 70226559 | 70226559 | - | 0        | 0        | -31.30259075 |
| chr11 | 70226572 | 70226572 | - | 0        | 0        | -31.98034188 |
| chr11 | 70226589 | 70226589 | - | 0        | 0        | -31.66805872 |
| chr11 | 70226603 | 70226603 | + | 8.32E-13 | 3.87E-11 | -25.53727358 |
| chr11 | 70226611 | 70226611 | + | 2.01E-13 | 9.92E-12 | -26.62298387 |
| chr11 | 70226720 | 70226720 | - | 0        | 0        | -26.6473142  |
| chr11 | 70226727 | 70226727 | - | 0        | 0        | -28.7566771  |
| chr11 | 70228747 | 70228747 | + | 3.57E-09 | 1.09E-07 | -26.81587486 |
| chr11 | 70232845 | 70232845 | + | 7.35E-08 | 1.85E-06 | -26.6518847  |
| chr11 | 70465410 | 70465410 | - | 1.11E-06 | 2.27E-05 | -34.06370461 |
| chr11 | 70465419 | 70465419 | + | 0        | 0        | -31.99578595 |
| chr11 | 70465436 | 70465436 | + | 0        | 0        | -32.7414729  |
| chr11 | 70465456 | 70465456 | + | 0        | 0        | -26.24425498 |
| chr11 | 70465468 | 70465468 | + | 0        | 0        | -30.10799268 |
| chr11 | 70465534 | 70465534 | - | 0        | 0        | -27.69953435 |
| chr11 | 70465761 | 70465761 | + | 4.68E-06 | 8.36E-05 | -30.11131725 |
| chr11 | 70465783 | 70465783 | + | 1.90E-07 | 4.47E-06 | -34.93699885 |
| chr11 | 70465800 | 70465800 | + | 6.08E-08 | 1.55E-06 | -36.91287879 |
| chr11 | 70465964 | 70465964 | - | 1.36E-13 | 6.85E-12 | -33.17374762 |
| chr11 | 70465974 | 70465974 | - | 7.70E-10 | 2.58E-08 | -27.74806892 |
| chr11 | 70465978 | 70465978 | - | 3.33E-16 | 2.11E-14 | -36.39724961 |
| chr11 | 70466011 | 70466011 | + | 0        | 0        | -26.31576478 |
| chr11 | 70466012 | 70466012 | - | 0        | 0        | -25.94865451 |
| chr11 | 70466028 | 70466028 | + | 0        | 0        | -40.46659849 |
| chr11 | 70466029 | 70466029 | - | 0        | 0        | -38.47108383 |



|       |          |          |   |            |            |              |
|-------|----------|----------|---|------------|------------|--------------|
| chr11 | 70466033 | 70466033 | + | 0          | 0          | -26.79301822 |
| chr11 | 70466039 | 70466039 | + | 0          | 0          | -40.42620577 |
| chr11 | 70466042 | 70466042 | + | 0          | 0          | -35.272391   |
| chr11 | 70466065 | 70466065 | + | 0          | 0          | -38.38172759 |
| chr11 | 70466066 | 70466066 | - | 2.07E-08   | 5.68E-07   | -39.44086022 |
| chr11 | 70466072 | 70466072 | + | 0          | 0          | -38.25201296 |
| chr11 | 70466073 | 70466073 | - | 1.43E-05   | 0.00022796 | -27.23188406 |
| chr11 | 70520140 | 70520140 | - | 1.86E-07   | 4.37E-06   | -40.60584205 |
| chr11 | 70520157 | 70520157 | + | 1.73E-06   | 3.39E-05   | -31.18818498 |
| chr11 | 70520158 | 70520158 | - | 1.96E-06   | 3.81E-05   | -38.9214967  |
| chr11 | 70520173 | 70520173 | + | 4.55E-15   | 2.63E-13   | -43.10344828 |
| chr11 | 70520177 | 70520177 | + | 0.00010094 | 0.00127147 | -25.28735632 |
| chr11 | 70520194 | 70520194 | + | 2.22E-16   | 1.43E-14   | -46.47058824 |
| chr11 | 70520196 | 70520196 | + | 4.39E-14   | 2.31E-12   | -41.83087028 |
| chr11 | 70520198 | 70520198 | + | 9.19E-05   | 0.00117242 | -26.21301775 |
| chr11 | 70520203 | 70520203 | + | 1.48E-11   | 6.06E-10   | -41.62046278 |
| chr11 | 70520358 | 70520358 | - | 0          | 0          | -44.59555041 |
| chr11 | 70520363 | 70520363 | - | 1.44E-15   | 8.70E-14   | -32.29942101 |
| chr11 | 70520365 | 70520365 | - | 0          | 0          | -26.94187243 |
| chr11 | 70520369 | 70520369 | - | 0          | 0          | -39.94323342 |
| chr11 | 70520385 | 70520385 | - | 0          | 0          | -40.45031315 |
| chr11 | 70520391 | 70520391 | + | 0          | 0          | -42.7665171  |
| chr11 | 70520392 | 70520392 | - | 0          | 0          | -44.15289961 |
| chr11 | 70520409 | 70520409 | + | 0          | 0          | -38.64009415 |
| chr11 | 70520410 | 70520410 | - | 0          | 0          | -48.67577598 |
| chr11 | 70520411 | 70520411 | + | 5.95E-12   | 2.53E-10   | -27.87871216 |
| chr11 | 70520413 | 70520413 | + | 0          | 0          | -34.7985407  |
| chr11 | 70520414 | 70520414 | - | 0          | 0          | -30.57665605 |
| chr11 | 70520429 | 70520429 | - | 2.22E-16   | 1.43E-14   | -28.29482948 |
| chr11 | 70520439 | 70520439 | + | 0          | 0          | -31.44249794 |
| chr11 | 70520440 | 70520440 | - | 0          | 0          | -36.58371268 |
| chr11 | 70520461 | 70520461 | + | 0          | 0          | -39.22683241 |
| chr11 | 70520462 | 70520462 | - | 0          | 0          | -40.06649615 |
| chr11 | 70520481 | 70520481 | + | 0          | 0          | -29.7246844  |
| chr11 | 70520482 | 70520482 | - | 0          | 0          | -39.72898608 |
| chr11 | 70520513 | 70520513 | + | 0          | 0          | -26.74163677 |
| chr11 | 70520529 | 70520529 | + | 0          | 0          | -25.74776104 |
| chr11 | 70520530 | 70520530 | - | 0          | 0          | -34.31318364 |
| chr11 | 70630436 | 70630436 | - | 0          | 0          | -41.05458927 |
| chr11 | 70630489 | 70630489 | - | 0          | 0          | -28.12942218 |
| chr11 | 70658770 | 70658770 | + | 1.14E-09   | 3.73E-08   | -38.42157348 |

|       |          |          |   |            |            |              |
|-------|----------|----------|---|------------|------------|--------------|
| chr11 | 71984780 | 71984780 | + | 2.76E-06   | 5.20E-05   | -25.76547861 |
| chr11 | 72029302 | 72029302 | + | 0.00031772 | 0.0033989  | -34.22286332 |
| chr11 | 72412161 | 72412161 | - | 0          | 0          | -26.28861666 |
| chr11 | 72544779 | 72544779 | + | 3.49E-12   | 1.53E-10   | -25.92426187 |
| chr11 | 72576444 | 72576444 | + | 0          | 0          | -31.06376692 |
| chr11 | 72576474 | 72576474 | + | 0          | 0          | -31.03619974 |
| chr11 | 72576569 | 72576569 | - | 0          | 0          | -26.980414   |
| chr11 | 72951761 | 72951761 | + | 0.00101252 | 0.00892205 | -36.61518662 |
| chr11 | 72951814 | 72951814 | - | 0          | 0          | -36.31778058 |
| chr11 | 73027271 | 73027271 | + | 0.00023438 | 0.00262379 | -38.45315904 |
| chr11 | 74871141 | 74871141 | + | 3.33E-16   | 2.11E-14   | -34.93489822 |
| chr11 | 74871317 | 74871317 | - | 0          | 0          | -37.73610825 |
| chr11 | 75153121 | 75153121 | - | 2.76E-13   | 1.34E-11   | -25.95563207 |
| chr11 | 75153137 | 75153137 | + | 2.68E-05   | 0.00039785 | -41.54228856 |
| chr11 | 75214021 | 75214021 | + | 8.57E-11   | 3.22E-09   | -31.16541353 |
| chr11 | 75214167 | 75214167 | + | 0          | 0          | -32.53199585 |
| chr11 | 75234972 | 75234972 | + | 5.53E-06   | 9.73E-05   | -25.01715854 |
| chr11 | 75252035 | 75252035 | - | 0.00061535 | 0.00591567 | -25.26234568 |
| chr11 | 75281908 | 75281908 | + | 0          | 0          | -36.03283077 |
| chr11 | 75291787 | 75291787 | - | 0          | 0          | -28.3052849  |
| chr11 | 75291798 | 75291798 | - | 0          | 0          | -27.04073666 |
| chr11 | 75291803 | 75291803 | - | 0          | 0          | -27.56742959 |
| chr11 | 75509732 | 75509732 | + | 0          | 0          | -25.8896515  |
| chr11 | 75514063 | 75514063 | + | 3.92E-06   | 7.13E-05   | -26.3372093  |
| chr11 | 75514611 | 75514611 | - | 7.87E-09   | 2.29E-07   | -44.16475973 |
| chr11 | 75572384 | 75572384 | + | 0          | 0          | -31.89611327 |
| chr11 | 75650611 | 75650611 | - | 0          | 0          | -27.86877177 |
| chr11 | 75652581 | 75652581 | + | 0          | 0          | -28.98670261 |
| chr11 | 75652588 | 75652588 | + | 0          | 0          | -35.9887731  |
| chr11 | 75652671 | 75652671 | - | 9.77E-15   | 5.47E-13   | -36.74835698 |
| chr11 | 75715899 | 75715899 | - | 0          | 0          | -33.65924693 |
| chr11 | 75795011 | 75795011 | - | 0          | 0          | -29.26214446 |
| chr11 | 75795023 | 75795023 | + | 0          | 0          | -37.63118505 |
| chr11 | 75795024 | 75795024 | - | 0          | 0          | -28.95046937 |
| chr11 | 75795033 | 75795033 | + | 0          | 0          | -32.61955128 |
| chr11 | 75795046 | 75795046 | + | 0          | 0          | -29.20422649 |
| chr11 | 75795126 | 75795126 | - | 0          | 0          | -28.44133069 |
| chr11 | 75876631 | 75876631 | + | 7.39E-14   | 3.81E-12   | -33.98373984 |
| chr11 | 76028235 | 76028235 | - | 0          | 0          | -25.22883633 |
| chr11 | 76267820 | 76267820 | - | 0          | 0          | -26.37469586 |
| chr11 | 76268216 | 76268216 | + | 3.63E-09   | 1.11E-07   | -39.80509745 |

|       |          |          |   |            |            |              |
|-------|----------|----------|---|------------|------------|--------------|
| chr11 | 76437021 | 76437021 | + | 0          | 0          | -35.4962845  |
| chr11 | 76437062 | 76437062 | + | 0          | 0          | -39.68143942 |
| chr11 | 76437087 | 76437087 | - | 0          | 0          | -33.75648598 |
| chr11 | 76437106 | 76437106 | - | 0          | 0          | -37.81890326 |
| chr11 | 76437113 | 76437113 | + | 1.13E-07   | 2.76E-06   | -33.87430493 |
| chr11 | 76437114 | 76437114 | - | 0          | 0          | -34.29817809 |
| chr11 | 76437116 | 76437116 | + | 1.20E-08   | 3.42E-07   | -36.86330561 |
| chr11 | 76437117 | 76437117 | - | 7.97E-07   | 1.67E-05   | -31.64656905 |
| chr11 | 76437128 | 76437128 | + | 1.76E-08   | 4.86E-07   | -34.99002245 |
| chr11 | 76437129 | 76437129 | - | 2.50E-05   | 0.00037411 | -25.39378459 |
| chr11 | 76437139 | 76437139 | + | 0          | 0          | -31.06881496 |
| chr11 | 76437159 | 76437159 | + | 0          | 0          | -34.28109108 |
| chr11 | 76437167 | 76437167 | + | 0          | 0          | -35.45122393 |
| chr11 | 76437168 | 76437168 | - | 0          | 0          | -34.23064536 |
| chr11 | 76437197 | 76437197 | - | 0          | 0          | -29.09692168 |
| chr11 | 76437201 | 76437201 | - | 0          | 0          | -29.35302198 |
| chr11 | 76437212 | 76437212 | + | 0          | 0          | -37.07883715 |
| chr11 | 76437213 | 76437213 | - | 0          | 0          | -29.19904408 |
| chr11 | 76437242 | 76437242 | + | 0          | 0          | -39.68675519 |
| chr11 | 76437243 | 76437243 | - | 0          | 0          | -37.15705382 |
| chr11 | 76437257 | 76437257 | - | 0          | 0          | -32.35696896 |
| chr11 | 76437280 | 76437280 | - | 0          | 0          | -34.65251689 |
| chr11 | 76624290 | 76624290 | - | 0          | 0          | -42.76153508 |
| chr11 | 76624301 | 76624301 | - | 1.70E-12   | 7.69E-11   | -30          |
| chr11 | 76659442 | 76659442 | - | 1.11E-16   | 7.26E-15   | -30.09323976 |
| chr11 | 76700504 | 76700504 | + | 1.50E-14   | 8.25E-13   | -27.1679933  |
| chr11 | 77463873 | 77463873 | - | 0          | 0          | -28.7437     |
| chr11 | 77472801 | 77472801 | + | 0.00023662 | 0.00264552 | -26.95095949 |
| chr11 | 77514427 | 77514427 | - | 7.43E-07   | 1.57E-05   | -28.66541353 |
| chr11 | 77783423 | 77783423 | - | 3.95E-07   | 8.75E-06   | -36.32034632 |
| chr11 | 77884652 | 77884652 | - | 0          | 0          | -30.68055754 |
| chr11 | 77884680 | 77884680 | + | 0          | 0          | -28.8473199  |
| chr11 | 77884681 | 77884681 | - | 0          | 0          | -34.69476074 |
| chr11 | 77893168 | 77893168 | + | 1.42E-08   | 3.99E-07   | -30.59186575 |
| chr11 | 77893188 | 77893188 | + | 9.45E-12   | 3.94E-10   | -36.48764769 |
| chr11 | 77926653 | 77926653 | + | 4.44E-16   | 2.79E-14   | -31.25265393 |
| chr11 | 78397138 | 78397138 | - | 2.78E-15   | 1.63E-13   | -33.0405138  |
| chr11 | 78397147 | 78397147 | - | 1.33E-15   | 8.06E-14   | -32.61236904 |
| chr11 | 78397297 | 78397297 | + | 2.81E-13   | 1.37E-11   | -44.69412477 |
| chr11 | 78551070 | 78551070 | + | 0.00078861 | 0.00726374 | -33.53635325 |
| chr11 | 78805952 | 78805952 | + | 1.16E-12   | 5.34E-11   | -35.42766106 |

|       |          |          |   |            |            |              |
|-------|----------|----------|---|------------|------------|--------------|
| chr11 | 78827312 | 78827312 | - | 6.70E-08   | 1.70E-06   | -25.81569665 |
| chr11 | 78999188 | 78999188 | - | 3.94E-10   | 1.37E-08   | -26.15650173 |
| chr11 | 79308073 | 79308073 | - | 0          | 0          | -35.39216288 |
| chr11 | 79652459 | 79652459 | - | 0.00027368 | 0.0029953  | -27.5862069  |
| chr11 | 79660343 | 79660343 | + | 2.41E-10   | 8.58E-09   | -38.47481021 |
| chr11 | 79705173 | 79705173 | + | 4.77E-07   | 1.04E-05   | -31.4697698  |
| chr11 | 79710262 | 79710262 | - | 0          | 0          | -26.89594855 |
| chr11 | 79710695 | 79710695 | + | 8.73E-10   | 2.90E-08   | -49.06716418 |
| chr11 | 79710723 | 79710723 | + | 2.39E-06   | 4.55E-05   | -36.07977438 |
| chr11 | 79738920 | 79738920 | - | 0          | 0          | -26.66123463 |
| chr11 | 79773529 | 79773529 | + | 0          | 0          | -25.51767857 |
| chr11 | 79793446 | 79793446 | + | 0          | 0          | -27.39758343 |
| chr11 | 79860909 | 79860909 | - | 4.44E-15   | 2.57E-13   | -45.28947368 |
| chr11 | 79860922 | 79860922 | - | 3.79E-13   | 1.82E-11   | -33.21052632 |
| chr11 | 80477946 | 80477946 | - | 0          | 0          | -26.07110062 |
| chr11 | 80477990 | 80477990 | - | 0          | 0          | -25.55807392 |
| chr11 | 80821108 | 80821108 | + | 4.97E-10   | 1.70E-08   | -27.26172799 |
| chr11 | 80821234 | 80821234 | - | 0          | 0          | -30.73550264 |
| chr11 | 80821264 | 80821264 | - | 0          | 0          | -37.90960452 |
| chr11 | 80821643 | 80821643 | + | 1.11E-16   | 7.26E-15   | -26.29843782 |
| chr11 | 80821649 | 80821649 | + | 0          | 0          | -34.14663244 |
| chr11 | 81820438 | 81820438 | - | 0.00022665 | 0.00254925 | -28.57142857 |
| chr11 | 82264328 | 82264328 | + | 0.00019829 | 0.00227453 | -27.5974026  |
| chr11 | 82580265 | 82580265 | + | 0          | 0          | -48.45350052 |
| chr11 | 82603090 | 82603090 | + | 5.27E-10   | 1.80E-08   | -26.91526113 |
| chr11 | 82800514 | 82800514 | + | 0          | 0          | -33.64786778 |
| chr11 | 82800560 | 82800560 | - | 3.27E-12   | 1.43E-10   | -38.57560976 |
| chr11 | 82863758 | 82863758 | - | 0.00027371 | 0.00299562 | -27.71929825 |
| chr11 | 82929000 | 82929000 | + | 0          | 0          | -41.00695501 |
| chr11 | 82929007 | 82929007 | + | 0          | 0          | -33.85338346 |
| chr11 | 82930148 | 82930148 | + | 0          | 0          | -27.95802814 |
| chr11 | 82930156 | 82930156 | + | 0          | 0          | -49.93499752 |
| chr11 | 82930157 | 82930157 | - | 0          | 0          | -40.41292969 |
| chr11 | 82930160 | 82930160 | + | 0          | 0          | -30.00158907 |
| chr11 | 82930165 | 82930165 | + | 0          | 0          | -29.03207146 |
| chr11 | 82930166 | 82930166 | - | 0          | 0          | -31.33226912 |
| chr11 | 82930173 | 82930173 | + | 0          | 0          | -36.14739585 |
| chr11 | 82930174 | 82930174 | - | 0          | 0          | -40.85382939 |
| chr11 | 82930211 | 82930211 | + | 2.78E-05   | 0.00041154 | -25.34013605 |
| chr11 | 82930224 | 82930224 | + | 2.33E-15   | 1.38E-13   | -51.93050193 |
| chr11 | 82930228 | 82930228 | + | 1.46E-10   | 5.35E-09   | -42.5997426  |

|       |          |          |   |            |            |              |
|-------|----------|----------|---|------------|------------|--------------|
| chr11 | 82989608 | 82989608 | + | 4.04E-10   | 1.40E-08   | -27.62333254 |
| chr11 | 82989657 | 82989657 | + | 3.70E-11   | 1.45E-09   | -29.31614751 |
| chr11 | 82989755 | 82989755 | - | 5.53E-12   | 2.36E-10   | -33.89691206 |
| chr11 | 82989801 | 82989801 | + | 0          | 0          | -34.02640264 |
| chr11 | 82989802 | 82989802 | - | 1.62E-13   | 8.11E-12   | -28.34526226 |
| chr11 | 82989834 | 82989834 | - | 1.09E-13   | 5.54E-12   | -28.5254153  |
| chr11 | 83429777 | 83429777 | + | 1.40E-12   | 6.38E-11   | -26.15455452 |
| chr11 | 83429789 | 83429789 | + | 0          | 0          | -36.67778044 |
| chr11 | 83472311 | 83472311 | + | 0          | 0          | -26.40886157 |
| chr11 | 84563374 | 84563374 | - | 3.21E-14   | 1.71E-12   | -27.89464653 |
| chr11 | 84764331 | 84764331 | + | 4.22E-05   | 0.00059443 | -40.9178744  |
| chr11 | 85525601 | 85525601 | + | 2.84E-07   | 6.46E-06   | -28.51724631 |
| chr11 | 85688574 | 85688574 | + | 0          | 0          | -35.9354955  |
| chr11 | 85791948 | 85791948 | + | 0          | 0          | -26.84391271 |
| chr11 | 85799982 | 85799982 | + | 0          | 0          | -26.34364402 |
| chr11 | 85799983 | 85799983 | - | 0          | 0          | -33.17454268 |
| chr11 | 85800007 | 85800007 | - | 0          | 0          | -25.27604925 |
| chr11 | 85800029 | 85800029 | - | 0          | 0          | -32.45185642 |
| chr11 | 85800044 | 85800044 | + | 0          | 0          | -28.61093038 |
| chr11 | 85800109 | 85800109 | - | 0          | 0          | -26.32890365 |
| chr11 | 85827557 | 85827557 | + | 0          | 0          | -38.24447273 |
| chr11 | 85827563 | 85827563 | + | 0          | 0          | -34.5299536  |
| chr11 | 85827672 | 85827672 | - | 0          | 0          | -38.82110949 |
| chr11 | 85885974 | 85885974 | - | 0          | 0          | -26.20440815 |
| chr11 | 85885999 | 85885999 | - | 0          | 0          | -37.73064397 |
| chr11 | 85886016 | 85886016 | + | 0          | 0          | -32.1848444  |
| chr11 | 85886050 | 85886050 | + | 0.00069985 | 0.00657932 | -32.6776395  |
| chr11 | 85886051 | 85886051 | - | 3.33E-16   | 2.11E-14   | -28.23417508 |
| chr11 | 85886084 | 85886084 | + | 2.93E-14   | 1.57E-12   | -71.99828473 |
| chr11 | 85886404 | 85886404 | - | 0          | 0          | -29.10461769 |
| chr11 | 85886450 | 85886450 | + | 0          | 0          | -26.81995971 |
| chr11 | 85886451 | 85886451 | - | 0          | 0          | -31.45108884 |
| chr11 | 85886542 | 85886542 | - | 0          | 0          | -30.20288354 |
| chr11 | 85886554 | 85886554 | - | 0          | 0          | -39.63408817 |
| chr11 | 85890087 | 85890087 | - | 2.91E-13   | 1.42E-11   | -25.30941704 |
| chr11 | 85918130 | 85918130 | + | 0          | 0          | -25.49017741 |
| chr11 | 85918243 | 85918243 | + | 0          | 0          | -27.93649413 |
| chr11 | 85984814 | 85984814 | + | 2.22E-15   | 1.32E-13   | -25.71621926 |
| chr11 | 86995131 | 86995131 | - | 0          | 0          | -33.97484521 |
| chr11 | 87264346 | 87264346 | - | 0          | 0          | -26.50798403 |
| chr11 | 87467897 | 87467897 | + | 8.94E-05   | 0.00114364 | 29.78906586  |

|       |          |          |   |            |           |              |
|-------|----------|----------|---|------------|-----------|--------------|
| chr11 | 87468560 | 87468560 | + | 0          | 0         | -31.45180023 |
| chr11 | 87657925 | 87657925 | - | 0          | 0         | -27.28338328 |
| chr11 | 87763479 | 87763479 | - | 0          | 0         | -29.06001775 |
| chr11 | 87778073 | 87778073 | - | 3.87E-06   | 7.05E-05  | -46.51046859 |
| chr11 | 87778110 | 87778110 | + | 0          | 0         | -30.40164941 |
| chr11 | 87778128 | 87778128 | - | 0          | 0         | -25.49611132 |
| chr11 | 87778133 | 87778133 | + | 0          | 0         | -28.8084741  |
| chr11 | 87778134 | 87778134 | - | 0          | 0         | -32.18219752 |
| chr11 | 87778148 | 87778148 | + | 0          | 0         | -34.8369076  |
| chr11 | 87778149 | 87778149 | - | 0          | 0         | -31.68203387 |
| chr11 | 87778163 | 87778163 | + | 3.22E-15   | 1.89E-13  | -30.09442249 |
| chr11 | 87778164 | 87778164 | - | 0          | 0         | -26.54746845 |
| chr11 | 87778181 | 87778181 | - | 0          | 0         | -29.29429429 |
| chr11 | 87778199 | 87778199 | + | 0          | 0         | -36.56759881 |
| chr11 | 87778200 | 87778200 | - | 0          | 0         | -39.32533733 |
| chr11 | 87778203 | 87778203 | + | 0          | 0         | -25.00003967 |
| chr11 | 87778204 | 87778204 | - | 0          | 0         | -30.7843104  |
| chr11 | 87778268 | 87778268 | - | 0          | 0         | -26.51729204 |
| chr11 | 87778863 | 87778863 | - | 1.44E-15   | 8.70E-14  | -30.65459594 |
| chr11 | 87779535 | 87779535 | - | 2.41E-10   | 8.56E-09  | -38.14409868 |
| chr11 | 88139223 | 88139223 | - | 6.78E-07   | 1.44E-05  | -51.32113821 |
| chr11 | 88139238 | 88139238 | - | 2.16E-12   | 9.65E-11  | -70.05102041 |
| chr11 | 88139332 | 88139332 | - | 0          | 0         | -40.38414426 |
| chr11 | 88139346 | 88139346 | - | 0          | 0         | -34.50791265 |
| chr11 | 88139358 | 88139358 | - | 0          | 0         | -47.04182872 |
| chr11 | 88139367 | 88139367 | - | 0          | 0         | -27.39086319 |
| chr11 | 88139373 | 88139373 | - | 0          | 0         | -49.45436323 |
| chr11 | 88139380 | 88139380 | + | 1.01E-07   | 2.47E-06  | -31.07913669 |
| chr11 | 88139381 | 88139381 | - | 0          | 0         | -38.10371562 |
| chr11 | 88139393 | 88139393 | + | 0          | 0         | -51.62180814 |
| chr11 | 88139401 | 88139401 | + | 2.04E-09   | 6.44E-08  | -34.67058824 |
| chr11 | 88139620 | 88139620 | - | 3.54E-09   | 1.08E-07  | -43.83116883 |
| chr11 | 88139632 | 88139632 | - | 6.89E-07   | 1.46E-05  | -34.94805195 |
| chr11 | 88169765 | 88169765 | - | 0          | 0         | -33.42296085 |
| chr11 | 88193287 | 88193287 | + | 0          | 0         | -44.68190608 |
| chr11 | 88193377 | 88193377 | + | 0          | 0         | -27.48441462 |
| chr11 | 88193378 | 88193378 | - | 0          | 0         | -31.42334122 |
| chr11 | 88193759 | 88193759 | - | 0.00022561 | 0.0025391 | -36.18984838 |
| chr11 | 88235752 | 88235752 | + | 1.33E-06   | 2.68E-05  | -25.63034929 |
| chr11 | 88235756 | 88235756 | + | 2.22E-16   | 1.43E-14  | -44.75595651 |
| chr11 | 88235987 | 88235987 | - | 2.62E-11   | 1.04E-09  | -40.73593074 |

|       |          |          |   |            |            |              |
|-------|----------|----------|---|------------|------------|--------------|
| chr11 | 88236003 | 88236003 | - | 2.33E-05   | 0.00035195 | -29.73197016 |
| chr11 | 88240878 | 88240878 | + | 1.10E-09   | 3.62E-08   | -30.75514874 |
| chr11 | 88241130 | 88241130 | + | 0          | 0          | -42.20851428 |
| chr11 | 88241131 | 88241131 | - | 3.17E-07   | 7.16E-06   | -39.07322654 |
| chr11 | 88241147 | 88241147 | + | 0          | 0          | -42.11836012 |
| chr11 | 88241180 | 88241180 | + | 0          | 0          | -38.62220229 |
| chr11 | 88468065 | 88468065 | + | 0          | 0          | -44.25601962 |
| chr11 | 88468066 | 88468066 | - | 1.20E-11   | 4.95E-10   | -26.43046007 |
| chr11 | 88468095 | 88468095 | + | 0          | 0          | -25.29030742 |
| chr11 | 88468100 | 88468100 | + | 0          | 0          | -28.80903631 |
| chr11 | 88468108 | 88468108 | + | 0          | 0          | -36.98162136 |
| chr11 | 88468110 | 88468110 | + | 0          | 0          | -29.62537533 |
| chr11 | 88490134 | 88490134 | + | 6.36E-07   | 1.36E-05   | -27.56728778 |
| chr11 | 88553370 | 88553370 | + | 1.28E-11   | 5.28E-10   | -28.16176471 |
| chr11 | 88625946 | 88625946 | - | 1.17E-12   | 5.36E-11   | -29.50841751 |
| chr11 | 88627611 | 88627611 | - | 7.90E-09   | 2.30E-07   | -25.97783572 |
| chr11 | 88687462 | 88687462 | - | 1.48E-05   | 0.00023491 | -25.28409091 |
| chr11 | 88690180 | 88690180 | + | 0          | 0          | -26.01936296 |
| chr11 | 88691038 | 88691038 | + | 0          | 0          | -25.03627718 |
| chr11 | 88691134 | 88691134 | - | 0          | 0          | -26.29988072 |
| chr11 | 88821282 | 88821282 | + | 3.93E-08   | 1.03E-06   | -35.26315789 |
| chr11 | 90033092 | 90033092 | - | 1.08E-07   | 2.65E-06   | -30.37332367 |
| chr11 | 90033102 | 90033102 | + | 1.38E-11   | 5.64E-10   | -40.09047499 |
| chr11 | 90033103 | 90033103 | - | 2.28E-07   | 5.28E-06   | -30.17967954 |
| chr11 | 90033112 | 90033112 | + | 2.94E-09   | 9.10E-08   | -33.32680251 |
| chr11 | 90033352 | 90033352 | + | 0          | 0          | -26.92445613 |
| chr11 | 90033510 | 90033510 | + | 2.98E-10   | 1.05E-08   | -26.90780142 |
| chr11 | 90347860 | 90347860 | + | 0          | 0          | -34.28628329 |
| chr11 | 90347861 | 90347861 | - | 0          | 0          | -33.26403326 |
| chr11 | 90347921 | 90347921 | + | 0          | 0          | -34.76691498 |
| chr11 | 90347922 | 90347922 | - | 0          | 0          | -37.1322429  |
| chr11 | 90347940 | 90347940 | + | 0          | 0          | -40.40473806 |
| chr11 | 90347941 | 90347941 | - | 0          | 0          | -36.2411065  |
| chr11 | 90347962 | 90347962 | + | 0          | 0          | -26.13606485 |
| chr11 | 90347963 | 90347963 | - | 0          | 0          | -27.02308859 |
| chr11 | 90358148 | 90358148 | + | 0          | 0          | -27.5914808  |
| chr11 | 90358847 | 90358847 | + | 5.80E-08   | 1.48E-06   | -36.82336182 |
| chr11 | 90359331 | 90359331 | - | 0.00060621 | 0.00584263 | -37.63066202 |
| chr11 | 90376577 | 90376577 | - | 6.43E-08   | 1.63E-06   | -45.31707317 |
| chr11 | 90380720 | 90380720 | - | 1.11E-16   | 7.26E-15   | -25.22616261 |
| chr11 | 90381545 | 90381545 | + | 1.33E-15   | 8.06E-14   | -33.13895957 |

|       |          |          |   |          |            |              |
|-------|----------|----------|---|----------|------------|--------------|
| chr11 | 90381664 | 90381664 | - | 0        | 0          | -25.56416882 |
| chr11 | 94138542 | 94138542 | - | 0        | 0          | -36.74186179 |
| chr11 | 94138600 | 94138600 | + | 0        | 0          | -25.29849137 |
| chr11 | 94138609 | 94138609 | + | 0        | 0          | -27.27327874 |
| chr11 | 94189738 | 94189738 | - | 0        | 0          | -26.22497927 |
| chr11 | 94243727 | 94243727 | - | 2.88E-14 | 1.54E-12   | -30.69425467 |
| chr11 | 94425733 | 94425733 | + | 0        | 0          | -31.89368771 |
| chr11 | 94425734 | 94425734 | - | 0        | 0          | -33.22871637 |
| chr11 | 94425761 | 94425761 | - | 0        | 0          | -28.50449944 |
| chr11 | 94425765 | 94425765 | - | 0        | 0          | -27.79718151 |
| chr11 | 94433894 | 94433894 | + | 0        | 0          | -30.89487402 |
| chr11 | 94433895 | 94433895 | - | 0        | 0          | -30.07246377 |
| chr11 | 94433916 | 94433916 | - | 0        | 0          | -27.99195918 |
| chr11 | 94434016 | 94434016 | - | 0        | 0          | -26.19009024 |
| chr11 | 94443304 | 94443304 | + | 2.68E-05 | 0.00039899 | -27.40740741 |
| chr11 | 94500338 | 94500338 | + | 0        | 0          | -31.50848765 |
| chr11 | 94500488 | 94500488 | - | 0        | 0          | -25.38660185 |
| chr11 | 94500505 | 94500505 | - | 0        | 0          | -28.28837899 |
| chr11 | 94521712 | 94521712 | - | 0        | 0          | -33.92518364 |
| chr11 | 94562646 | 94562646 | + | 1.29E-14 | 7.13E-13   | -25.76936003 |
| chr11 | 94565502 | 94565502 | - | 0        | 0          | -41.54534943 |
| chr11 | 94570889 | 94570889 | + | 1.31E-09 | 4.26E-08   | -26.81227641 |
| chr11 | 94570926 | 94570926 | + | 0        | 0          | -41.85632184 |
| chr11 | 94571072 | 94571072 | - | 0        | 0          | -37.49452074 |
| chr11 | 94934851 | 94934851 | + | 4.44E-16 | 2.79E-14   | -25.65728274 |
| chr11 | 94971251 | 94971251 | - | 0        | 0          | -28.44885789 |
| chr11 | 94971275 | 94971275 | - | 0        | 0          | -25.5353231  |
| chr11 | 94971284 | 94971284 | - | 0        | 0          | -27.74242149 |
| chr11 | 94987579 | 94987579 | + | 3.10E-14 | 1.66E-12   | -30.55034787 |
| chr11 | 94987639 | 94987639 | - | 0        | 0          | -27.10268775 |
| chr11 | 95010489 | 95010489 | - | 0        | 0          | -30.79922027 |
| chr11 | 95019914 | 95019914 | - | 0        | 0          | -28.99102493 |
| chr11 | 95019936 | 95019936 | - | 0        | 0          | -34.05749642 |
| chr11 | 95019939 | 95019939 | - | 0        | 0          | -38.11267393 |
| chr11 | 95019945 | 95019945 | - | 0        | 0          | -38.41578269 |
| chr11 | 95019953 | 95019953 | - | 0        | 0          | -26.24093055 |
| chr11 | 95019960 | 95019960 | + | 0        | 0          | -31.56160038 |
| chr11 | 95019961 | 95019961 | - | 0        | 0          | -33.40475953 |
| chr11 | 95019970 | 95019970 | + | 0        | 0          | -27.98341328 |
| chr11 | 95019982 | 95019982 | + | 0        | 0          | -40.86751087 |
| chr11 | 95019983 | 95019983 | - | 0        | 0          | -38.25683303 |



|       |          |          |   |            |            |              |
|-------|----------|----------|---|------------|------------|--------------|
| chr11 | 95020027 | 95020027 | + | 0          | 0          | -38.39166574 |
| chr11 | 95020028 | 95020028 | - | 0          | 0          | -36.68803624 |
| chr11 | 95020055 | 95020055 | + | 0          | 0          | -38.99233542 |
| chr11 | 95020056 | 95020056 | - | 0          | 0          | -34.57980377 |
| chr11 | 95020060 | 95020060 | + | 0          | 0          | -33.61362026 |
| chr11 | 95020061 | 95020061 | - | 0          | 0          | -32.11272964 |
| chr11 | 95020063 | 95020063 | + | 0          | 0          | -34.21905727 |
| chr11 | 95020064 | 95020064 | - | 0          | 0          | -32.17860687 |
| chr11 | 95020069 | 95020069 | + | 0          | 0          | -35.79276239 |
| chr11 | 95020070 | 95020070 | - | 0          | 0          | -34.96860382 |
| chr11 | 95020076 | 95020076 | + | 0          | 0          | -33.56501715 |
| chr11 | 95020077 | 95020077 | - | 0          | 0          | -30.21715228 |
| chr11 | 95020081 | 95020081 | - | 0          | 0          | -36.67104215 |
| chr11 | 95020086 | 95020086 | + | 0          | 0          | -44.92828397 |
| chr11 | 95020087 | 95020087 | - | 0          | 0          | -27.03685539 |
| chr11 | 95020100 | 95020100 | + | 0          | 0          | -43.44155844 |
| chr11 | 95020101 | 95020101 | - | 0          | 0          | -44.85823755 |
| chr11 | 95020103 | 95020103 | + | 0          | 0          | -36.71903096 |
| chr11 | 95020104 | 95020104 | - | 0          | 0          | -40.71652944 |
| chr11 | 95020108 | 95020108 | + | 0          | 0          | -43.21220958 |
| chr11 | 95020109 | 95020109 | - | 0          | 0          | -39.84609028 |
| chr11 | 95020124 | 95020124 | + | 0          | 0          | -31.0595763  |
| chr11 | 95020125 | 95020125 | - | 0          | 0          | -35.26953521 |
| chr11 | 95020134 | 95020134 | - | 0          | 0          | -40.61267012 |
| chr11 | 95078593 | 95078593 | + | 0          | 0          | -28.14271996 |
| chr11 | 95082992 | 95082992 | - | 2.10E-10   | 7.53E-09   | -28.1773178  |
| chr11 | 95123022 | 95123022 | + | 0          | 0          | -31.38073839 |
| chr11 | 95123180 | 95123180 | - | 1.04E-12   | 4.79E-11   | -37.86366182 |
| chr11 | 95148365 | 95148365 | + | 0          | 0          | -35.44279795 |
| chr11 | 95223316 | 95223316 | + | 0          | 0          | -28.15128257 |
| chr11 | 95223333 | 95223333 | + | 0          | 0          | -25.02906245 |
| chr11 | 95326455 | 95326455 | - | 0.00037403 | 0.00390048 | -28.9295393  |
| chr11 | 95540953 | 95540953 | - | 0.00032709 | 0.00348266 | -26.56127515 |
| chr11 | 95594765 | 95594765 | + | 0          | 0          | -26.13539225 |
| chr11 | 95597972 | 95597972 | - | 0          | 0          | -30.02655539 |
| chr11 | 95597993 | 95597993 | - | 0          | 0          | -34.59687177 |
| chr11 | 95598009 | 95598009 | - | 0          | 0          | -26.0932196  |
| chr11 | 95622279 | 95622279 | - | 0          | 0          | -39.4270535  |
| chr11 | 95645372 | 95645372 | - | 2.59E-08   | 7.00E-07   | -28.23698041 |
| chr11 | 95682116 | 95682116 | + | 0          | 0          | -28.59164992 |
| chr11 | 95682212 | 95682212 | - | 0          | 0          | -27.54385294 |

|       |          |          |   |            |            |              |
|-------|----------|----------|---|------------|------------|--------------|
| chr11 | 95682246 | 95682246 | - | 0          | 0          | -31.37305747 |
| chr11 | 95749558 | 95749558 | + | 1.14E-05   | 0.00018554 | -49.42528736 |
| chr11 | 95823852 | 95823852 | + | 8.46E-10   | 2.82E-08   | -25.5917987  |
| chr11 | 95991218 | 95991218 | + | 0          | 0          | -29.45707071 |
| chr11 | 95991344 | 95991344 | + | 7.20E-09   | 2.11E-07   | -26.09932218 |
| chr11 | 95991527 | 95991527 | + | 0          | 0          | -27.52240145 |
| chr11 | 95991630 | 95991630 | - | 9.32E-11   | 3.48E-09   | -26.4223518  |
| chr11 | 96018063 | 96018063 | + | 4.44E-16   | 2.79E-14   | -26.80812791 |
| chr11 | 96168308 | 96168308 | - | 0          | 0          | -31.20498331 |
| chr11 | 96265125 | 96265125 | - | 4.54E-07   | 9.96E-06   | -25.03087373 |
| chr11 | 96265153 | 96265153 | - | 1.68E-07   | 3.98E-06   | -28.91384238 |
| chr11 | 96266128 | 96266128 | + | 0          | 0          | -29.6598731  |
| chr11 | 96266326 | 96266326 | - | 1.59E-07   | 3.77E-06   | -26.76709981 |
| chr11 | 96279250 | 96279250 | + | 1.20E-05   | 0.0001953  | -28.52621328 |
| chr11 | 96289538 | 96289538 | + | 0          | 0          | -31.31682015 |
| chr11 | 96289541 | 96289541 | + | 0          | 0          | -39.20639364 |
| chr11 | 96289542 | 96289542 | - | 2.29E-09   | 7.18E-08   | -42.60249554 |
| chr11 | 96289579 | 96289579 | - | 2.39E-11   | 9.54E-10   | -34.97301089 |
| chr11 | 96291167 | 96291167 | + | 0          | 0          | -31.04841519 |
| chr11 | 96291179 | 96291179 | + | 3.44E-15   | 2.01E-13   | -25.14101994 |
| chr11 | 96291204 | 96291204 | - | 1.22E-14   | 6.77E-13   | -26.56550978 |
| chr11 | 96302148 | 96302148 | - | 1.11E-16   | 7.26E-15   | -31.92985893 |
| chr11 | 96302456 | 96302456 | - | 3.45E-07   | 7.73E-06   | -30.39784946 |
| chr11 | 96320524 | 96320524 | + | 3.63E-08   | 9.58E-07   | -30.84349593 |
| chr11 | 96320525 | 96320525 | - | 1.99E-12   | 8.90E-11   | -31.31623932 |
| chr11 | 96320551 | 96320551 | + | 1.44E-13   | 7.24E-12   | -41.43356643 |
| chr11 | 96332203 | 96332203 | + | 0          | 0          | -28.86690734 |
| chr11 | 96332722 | 96332722 | + | 0          | 0          | -35.9437316  |
| chr11 | 96332762 | 96332762 | + | 0          | 0          | -27.68248567 |
| chr11 | 96332805 | 96332805 | - | 0          | 0          | -41.43319228 |
| chr11 | 96332807 | 96332807 | - | 0          | 0          | -26.71071509 |
| chr11 | 96332815 | 96332815 | - | 0          | 0          | -34.78534845 |
| chr11 | 96332830 | 96332830 | - | 0          | 0          | -27.83733913 |
| chr11 | 96332845 | 96332845 | + | 2.63E-05   | 0.00039173 | -36.59233848 |
| chr11 | 96332846 | 96332846 | - | 0          | 0          | -25.02106582 |
| chr11 | 96332853 | 96332853 | + | 0.00043007 | 0.00438189 | -31.93939394 |
| chr11 | 96332869 | 96332869 | + | 3.23E-07   | 7.29E-06   | -29.45407381 |
| chr11 | 96332923 | 96332923 | + | 0          | 0          | -25.15253313 |
| chr11 | 96332924 | 96332924 | - | 0          | 0          | -26.09229468 |
| chr11 | 96332926 | 96332926 | - | 0          | 0          | -27.55425181 |
| chr11 | 96332970 | 96332970 | - | 0          | 0          | -25.72376309 |

|       |          |          |   |          |          |              |
|-------|----------|----------|---|----------|----------|--------------|
| chr11 | 96333068 | 96333068 | - | 0        | 0        | -25.53251904 |
| chr11 | 96341950 | 96341950 | + | 0        | 0        | -29.12701788 |
| chr11 | 96341951 | 96341951 | - | 0        | 0        | -31.57358327 |
| chr11 | 96341979 | 96341979 | - | 0        | 0        | -26.58468856 |
| chr11 | 96341998 | 96341998 | + | 0        | 0        | -31.50289948 |
| chr11 | 96342022 | 96342022 | + | 0        | 0        | -29.76202268 |
| chr11 | 96342025 | 96342025 | + | 0        | 0        | -29.51839099 |
| chr11 | 96342037 | 96342037 | + | 0        | 0        | -33.76001819 |
| chr11 | 96342040 | 96342040 | + | 0        | 0        | -29.85378258 |
| chr11 | 96342045 | 96342045 | + | 0        | 0        | -30.98037979 |
| chr11 | 96342061 | 96342061 | - | 0        | 0        | -27.77353274 |
| chr11 | 96342087 | 96342087 | - | 0        | 0        | -34.12037719 |
| chr11 | 96342098 | 96342098 | - | 0        | 0        | -31.4736873  |
| chr11 | 96342101 | 96342101 | - | 0        | 0        | -34.65562728 |
| chr11 | 96345664 | 96345664 | + | 0        | 0        | -38.44486804 |
| chr11 | 96345666 | 96345666 | + | 0        | 0        | -40.07976148 |
| chr11 | 96345674 | 96345674 | + | 0        | 0        | -39.48824887 |
| chr11 | 96345678 | 96345678 | + | 0        | 0        | -37.58891114 |
| chr11 | 96345680 | 96345680 | + | 0        | 0        | -36.44292721 |
| chr11 | 96345684 | 96345684 | + | 0        | 0        | -38.64892282 |
| chr11 | 96345687 | 96345687 | + | 0        | 0        | -39.80968943 |
| chr11 | 96345697 | 96345697 | + | 0        | 0        | -37.22640098 |
| chr11 | 96345699 | 96345699 | + | 0        | 0        | -34.89201934 |
| chr11 | 96345700 | 96345700 | - | 0        | 0        | -42.75562372 |
| chr11 | 96345738 | 96345738 | - | 0        | 0        | -44.02033351 |
| chr11 | 96345750 | 96345750 | - | 0        | 0        | -43.98282147 |
| chr11 | 96345758 | 96345758 | + | 0        | 0        | -41.02128477 |
| chr11 | 96345763 | 96345763 | + | 0        | 0        | -38.44278793 |
| chr11 | 96345790 | 96345790 | + | 0        | 0        | -35.51348685 |
| chr11 | 96345794 | 96345794 | + | 0        | 0        | -37.54783399 |
| chr11 | 96345868 | 96345868 | - | 0        | 0        | -37.84255131 |
| chr11 | 96345889 | 96345889 | - | 0        | 0        | -39.72056265 |
| chr11 | 96345892 | 96345892 | + | 0        | 0        | -43.45416763 |
| chr11 | 96345903 | 96345903 | + | 0        | 0        | -45.18742381 |
| chr11 | 96345904 | 96345904 | - | 2.21E-13 | 1.09E-11 | -30.90757145 |
| chr11 | 96345921 | 96345921 | + | 1.67E-15 | 9.99E-14 | -29.92480629 |
| chr11 | 96345922 | 96345922 | - | 0        | 0        | -33.14854438 |
| chr11 | 96345926 | 96345926 | - | 1.33E-14 | 7.36E-13 | -26.70655956 |
| chr11 | 96346075 | 96346075 | - | 0        | 0        | -25.82150996 |
| chr11 | 96346083 | 96346083 | + | 0        | 0        | -34.80045351 |
| chr11 | 96346129 | 96346129 | + | 0        | 0        | -27.19094567 |

|       |          |          |   |          |          |              |
|-------|----------|----------|---|----------|----------|--------------|
| chr11 | 96346180 | 96346180 | + | 0        | 0        | -34.41282366 |
| chr11 | 96346181 | 96346181 | - | 0        | 0        | -31.32372138 |
| chr11 | 96346182 | 96346182 | + | 0        | 0        | -33.17998386 |
| chr11 | 96346183 | 96346183 | - | 0        | 0        | -34.58070387 |
| chr11 | 96346188 | 96346188 | + | 0        | 0        | -38.06083281 |
| chr11 | 96346189 | 96346189 | - | 0        | 0        | -37.77503732 |
| chr11 | 96346194 | 96346194 | + | 0        | 0        | -31.14259588 |
| chr11 | 96346195 | 96346195 | - | 0        | 0        | -34.98450551 |
| chr11 | 96346205 | 96346205 | - | 0        | 0        | -39.13171087 |
| chr11 | 96354666 | 96354666 | + | 0        | 0        | -25.53165585 |
| chr11 | 96354676 | 96354676 | + | 0        | 0        | -27.75308436 |
| chr11 | 96366870 | 96366870 | + | 0        | 0        | -33.58154102 |
| chr11 | 96366880 | 96366880 | + | 0        | 0        | -28.96055232 |
| chr11 | 96366881 | 96366881 | - | 0        | 0        | -33.40834274 |
| chr11 | 96366941 | 96366941 | + | 0        | 0        | -31.13508398 |
| chr11 | 96366944 | 96366944 | + | 0        | 0        | -32.312777   |
| chr11 | 96366945 | 96366945 | - | 0        | 0        | -31.1087023  |
| chr11 | 96366967 | 96366967 | + | 0        | 0        | -37.45172895 |
| chr11 | 96366968 | 96366968 | - | 0        | 0        | -34.91259282 |
| chr11 | 96407532 | 96407532 | + | 1.17E-14 | 6.48E-13 | -28          |
| chr11 | 96407537 | 96407537 | + | 2.47E-13 | 1.21E-11 | -26.35181776 |
| chr11 | 96407540 | 96407540 | + | 0        | 0        | -38.52157745 |
| chr11 | 96448406 | 96448406 | - | 0        | 0        | -25.15588522 |
| chr11 | 96644784 | 96644784 | - | 2.15E-12 | 9.58E-11 | -26.19922772 |
| chr11 | 96644820 | 96644820 | + | 0        | 0        | -28.67813697 |
| chr11 | 96644821 | 96644821 | - | 0        | 0        | -27.22755043 |
| chr11 | 96736475 | 96736475 | + | 2.74E-06 | 5.16E-05 | -27.81832928 |
| chr11 | 96824993 | 96824993 | + | 3.78E-06 | 6.90E-05 | -31.33333333 |
| chr11 | 96863433 | 96863433 | + | 4.82E-13 | 2.30E-11 | -25.21539853 |
| chr11 | 96928851 | 96928851 | + | 0        | 0        | -31.55743924 |
| chr11 | 96928893 | 96928893 | - | 0        | 0        | -40.08165487 |
| chr11 | 96935270 | 96935270 | + | 0        | 0        | -31.99474891 |
| chr11 | 96935276 | 96935276 | + | 0        | 0        | -34.14749745 |
| chr11 | 96935386 | 96935386 | - | 0        | 0        | -31.2588682  |
| chr11 | 96986963 | 96986963 | + | 0        | 0        | -32.68107398 |
| chr11 | 96986964 | 96986964 | - | 0        | 0        | -34.1770139  |
| chr11 | 96993094 | 96993094 | + | 2.74E-12 | 1.21E-10 | -30.910162   |
| chr11 | 96993142 | 96993142 | - | 0        | 0        | -35.34375025 |
| chr11 | 96993177 | 96993177 | + | 3.85E-09 | 1.17E-07 | -46.07397794 |
| chr11 | 96993184 | 96993184 | + | 2.38E-07 | 5.50E-06 | -43.45561594 |
| chr11 | 96993441 | 96993441 | + | 0        | 0        | -28.19243551 |

|       |          |          |   |            |            |              |
|-------|----------|----------|---|------------|------------|--------------|
| chr11 | 96993459 | 96993459 | + | 0          | 0          | -39.60532931 |
| chr11 | 96993460 | 96993460 | - | 0          | 0          | -26.93145674 |
| chr11 | 96997221 | 96997221 | + | 0          | 0          | -33.82300873 |
| chr11 | 96997236 | 96997236 | + | 0          | 0          | -26.53702195 |
| chr11 | 96997237 | 96997237 | - | 0          | 0          | -27.69624533 |
| chr11 | 96997266 | 96997266 | + | 0          | 0          | -33.68269158 |
| chr11 | 96997267 | 96997267 | - | 0          | 0          | -33.47135854 |
| chr11 | 96997321 | 96997321 | + | 0          | 0          | -34.44004617 |
| chr11 | 96997337 | 96997337 | - | 0          | 0          | -39.71195262 |
| chr11 | 96997366 | 96997366 | - | 0          | 0          | -43.32297001 |
| chr11 | 96997369 | 96997369 | - | 0          | 0          | -34.84833627 |
| chr11 | 96997371 | 96997371 | - | 0          | 0          | -46.01711808 |
| chr11 | 96997408 | 96997408 | + | 0          | 0          | -27.33130727 |
| chr11 | 96997411 | 96997411 | + | 0          | 0          | -47.06835913 |
| chr11 | 96997600 | 96997600 | - | 0          | 0          | -26.36023989 |
| chr11 | 97003106 | 97003106 | + | 0          | 0          | -28.32117832 |
| chr11 | 97003128 | 97003128 | + | 0          | 0          | -28.9433144  |
| chr11 | 97003147 | 97003147 | + | 0          | 0          | -27.06124901 |
| chr11 | 97003148 | 97003148 | - | 0          | 0          | -25.67873986 |
| chr11 | 97025840 | 97025840 | + | 2.38E-08   | 6.47E-07   | -28.46426807 |
| chr11 | 97120062 | 97120062 | + | 0          | 0          | -33.33429887 |
| chr11 | 97123758 | 97123758 | + | 0          | 0          | -27.5805709  |
| chr11 | 97123829 | 97123829 | - | 0.00056858 | 0.00553945 | -30.7998937  |
| chr11 | 97138736 | 97138736 | - | 0.00109943 | 0.00954097 | -27.27272727 |
| chr11 | 97147528 | 97147528 | + | 2.51E-07   | 5.78E-06   | -34.64452214 |
| chr11 | 97152577 | 97152577 | + | 0          | 0          | -34.50687027 |
| chr11 | 97152667 | 97152667 | + | 0          | 0          | -28.46146375 |
| chr11 | 97152668 | 97152668 | - | 0          | 0          | -30.26110469 |
| chr11 | 97332754 | 97332754 | - | 0.00096447 | 0.0085722  | -27.73892774 |
| chr11 | 97419706 | 97419706 | - | 1.02E-06   | 2.08E-05   | -27.06449668 |
| chr11 | 97489673 | 97489673 | - | 4.58E-05   | 0.00063957 | -26.35057471 |
| chr11 | 97589392 | 97589392 | - | 1.94E-07   | 4.55E-06   | -31.67819834 |
| chr11 | 97590677 | 97590677 | + | 0          | 0          | -29.16970143 |
| chr11 | 97626357 | 97626357 | + | 8.85E-07   | 1.84E-05   | -25.54826617 |
| chr11 | 97626437 | 97626437 | - | 0          | 0          | -26.70001117 |
| chr11 | 97626712 | 97626712 | + | 0          | 0          | -31.94501157 |
| chr11 | 97626741 | 97626741 | - | 1.56E-13   | 7.78E-12   | -25.28167311 |
| chr11 | 97626959 | 97626959 | + | 0          | 0          | -42.47863248 |
| chr11 | 97626960 | 97626960 | - | 0          | 0          | -28.50468181 |
| chr11 | 97626977 | 97626977 | + | 0          | 0          | -34.0732162  |
| chr11 | 97626983 | 97626983 | + | 0          | 0          | -31.6928545  |

|       |          |          |   |          |           |              |
|-------|----------|----------|---|----------|-----------|--------------|
| chr11 | 97627075 | 97627075 | - | 0        | 0         | -37.27107507 |
| chr11 | 97627103 | 97627103 | - | 0        | 0         | -34.08637711 |
| chr11 | 97627457 | 97627457 | + | 0        | 0         | -34.59629563 |
| chr11 | 97627527 | 97627527 | - | 0        | 0         | -30.0292032  |
| chr11 | 97627814 | 97627814 | + | 0        | 0         | -45.56149231 |
| chr11 | 97627836 | 97627836 | + | 0        | 0         | -26.1506426  |
| chr11 | 97627907 | 97627907 | - | 0        | 0         | -32.4076265  |
| chr11 | 97627922 | 97627922 | - | 0        | 0         | -35.98114496 |
| chr11 | 97627955 | 97627955 | + | 0        | 0         | -34.86111111 |
| chr11 | 97627959 | 97627959 | + | 0        | 0         | -35.15352885 |
| chr11 | 97627960 | 97627960 | - | 0        | 0         | -36.72010399 |
| chr11 | 97628006 | 97628006 | + | 0        | 0         | -38.38079214 |
| chr11 | 97628007 | 97628007 | - | 0        | 0         | -33.25304949 |
| chr11 | 97628015 | 97628015 | + | 0        | 0         | -41.00659945 |
| chr11 | 97628169 | 97628169 | + | 0        | 0         | -34.41320744 |
| chr11 | 97628170 | 97628170 | - | 0        | 0         | -36.75508808 |
| chr11 | 97628269 | 97628269 | - | 0        | 0         | -31.96146245 |
| chr11 | 97628294 | 97628294 | - | 0        | 0         | -25.65607241 |
| chr11 | 97628299 | 97628299 | - | 0        | 0         | -26.14871958 |
| chr11 | 97697869 | 97697869 | + | 1.46E-05 | 0.0002319 | -35.71428571 |
| chr11 | 97718863 | 97718863 | - | 0        | 0         | -30.14647462 |
| chr11 | 97718894 | 97718894 | - | 0        | 0         | -25.48574095 |
| chr11 | 98002961 | 98002961 | + | 0        | 0         | -43.59173257 |
| chr11 | 98002976 | 98002976 | + | 0        | 0         | -31.46878484 |
| chr11 | 98002977 | 98002977 | - | 0        | 0         | -30.80017209 |
| chr11 | 98002986 | 98002986 | + | 0        | 0         | -42.3043617  |
| chr11 | 98002987 | 98002987 | - | 0        | 0         | -38.05050151 |
| chr11 | 98002999 | 98002999 | - | 0        | 0         | -28.11733168 |
| chr11 | 98003004 | 98003004 | + | 0        | 0         | -31.5708258  |
| chr11 | 98003017 | 98003017 | + | 0        | 0         | -27.30496454 |
| chr11 | 98003018 | 98003018 | - | 0        | 0         | -34.20421519 |
| chr11 | 98003064 | 98003064 | + | 0        | 0         | -28.79435362 |
| chr11 | 98003065 | 98003065 | - | 0        | 0         | -35.09606333 |
| chr11 | 98003142 | 98003142 | - | 0        | 0         | -28.63979849 |
| chr11 | 98003150 | 98003150 | + | 3.38E-11 | 1.33E-09  | -35.01331305 |
| chr11 | 98003151 | 98003151 | - | 0        | 0         | -25.76561855 |
| chr11 | 98003156 | 98003156 | + | 2.18E-10 | 7.81E-09  | -31.46446363 |
| chr11 | 98003236 | 98003236 | - | 0        | 0         | -25.73585591 |
| chr11 | 98003296 | 98003296 | + | 0        | 0         | -43.91613813 |
| chr11 | 98003297 | 98003297 | - | 0        | 0         | -36.31488149 |
| chr11 | 98019642 | 98019642 | + | 4.95E-08 | 1.28E-06  | -41.42028986 |

|       |          |          |   |            |            |              |
|-------|----------|----------|---|------------|------------|--------------|
| chr11 | 98019648 | 98019648 | + | 3.62E-11   | 1.42E-09   | -42.66666667 |
| chr11 | 98019649 | 98019649 | - | 5.67E-09   | 1.69E-07   | -57.34811166 |
| chr11 | 98019669 | 98019669 | - | 1.22E-08   | 3.47E-07   | -56.54430849 |
| chr11 | 98339151 | 98339151 | + | 0.00044518 | 0.00451235 | -33.33333333 |
| chr11 | 98349281 | 98349281 | - | 2.90E-10   | 1.02E-08   | -36.59846547 |
| chr11 | 98349302 | 98349302 | - | 2.47E-09   | 7.73E-08   | -35.05987676 |
| chr11 | 98349351 | 98349351 | + | 0          | 0          | -27.57249379 |
| chr11 | 98349352 | 98349352 | - | 0          | 0          | -26.14353226 |
| chr11 | 98350423 | 98350423 | + | 0          | 0          | -32.26890642 |
| chr11 | 98350606 | 98350606 | - | 1.12E-05   | 0.00018371 | -29.41176471 |
| chr11 | 98384165 | 98384165 | - | 8.44E-08   | 2.10E-06   | -30.57929725 |
| chr11 | 98447532 | 98447532 | + | 0.00024584 | 0.00273316 | -26.64304124 |
| chr11 | 98447538 | 98447538 | + | 2.44E-06   | 4.64E-05   | -33.7809557  |
| chr11 | 98448422 | 98448422 | + | 0          | 0          | -26.48355906 |
| chr11 | 98599524 | 98599524 | + | 1.23E-08   | 3.48E-07   | -27.64038533 |
| chr11 | 98749088 | 98749088 | - | 4.26E-10   | 1.47E-08   | -37.81408451 |
| chr11 | 98752412 | 98752412 | + | 2.55E-15   | 1.51E-13   | -46.32754342 |
| chr11 | 98767344 | 98767344 | + | 0          | 0          | -36.77042505 |
| chr11 | 98767348 | 98767348 | + | 0          | 0          | -40.17991004 |
| chr11 | 98767387 | 98767387 | + | 5.64E-12   | 2.41E-10   | -29.01420577 |
| chr11 | 98767391 | 98767391 | + | 0          | 0          | -38.625      |
| chr11 | 98768278 | 98768278 | + | 0          | 0          | -30.22200434 |
| chr11 | 98768279 | 98768279 | - | 0          | 0          | -33.58491482 |
| chr11 | 98768326 | 98768326 | - | 1.41E-06   | 2.81E-05   | -27.12710084 |
| chr11 | 98768333 | 98768333 | - | 2.09E-07   | 4.87E-06   | -30.4388422  |
| chr11 | 98830400 | 98830400 | - | 7.78E-09   | 2.27E-07   | -47.6744186  |
| chr11 | 98837666 | 98837666 | + | 0          | 0          | -36.44531067 |
| chr11 | 98847338 | 98847338 | + | 9.57E-05   | 0.00121437 | -44.23076923 |
| chr11 | 98926256 | 98926256 | - | 0          | 0          | -27.57666993 |
| chr11 | 98936341 | 98936341 | + | 0          | 0          | -26.80237489 |
| chr11 | 98936359 | 98936359 | + | 0          | 0          | -30.57430611 |
| chr11 | 98936369 | 98936369 | + | 0          | 0          | -30.17655367 |
| chr11 | 98936564 | 98936564 | + | 0          | 0          | -29.09812125 |
| chr11 | 98936589 | 98936589 | + | 0          | 0          | -28.63882698 |
| chr11 | 98936590 | 98936590 | - | 0          | 0          | -27.23318115 |
| chr11 | 98936638 | 98936638 | + | 0          | 0          | -32.58905543 |
| chr11 | 98971383 | 98971383 | - | 0          | 0          | -29.44238324 |
| chr11 | 98983432 | 98983432 | + | 7.70E-05   | 0.00100488 | -29.44642368 |
| chr11 | 98983468 | 98983468 | + | 2.50E-05   | 0.00037505 | -35.23391813 |
| chr11 | 99072209 | 99072209 | + | 0.00011268 | 0.00139706 | -25.08847085 |
| chr11 | 99143804 | 99143804 | + | 0          | 0          | -29.39397092 |

|       |           |           |   |            |            |              |
|-------|-----------|-----------|---|------------|------------|--------------|
| chr11 | 99143907  | 99143907  | + | 1.42E-11   | 5.80E-10   | -31.40650061 |
| chr11 | 99144058  | 99144058  | - | 0          | 0          | -25.97016416 |
| chr11 | 99377211  | 99377211  | - | 0.0001019  | 0.00128197 | 31.96969697  |
| chr11 | 99932111  | 99932111  | + | 7.27E-05   | 0.00095658 | -26.3539283  |
| chr11 | 99932121  | 99932121  | + | 6.13E-05   | 0.00082482 | -27.85507246 |
| chr11 | 99932133  | 99932133  | + | 4.85E-06   | 8.64E-05   | -31.35011442 |
| chr11 | 100354158 | 100354158 | + | 2.22E-16   | 1.43E-14   | -44.43636985 |
| chr11 | 100387952 | 100387952 | + | 0          | 0          | -29.57106651 |
| chr11 | 100388096 | 100388096 | - | 0          | 0          | -28.98294819 |
| chr11 | 100411766 | 100411766 | + | 0          | 0          | -26.28277455 |
| chr11 | 100521685 | 100521685 | - | 6.98E-06   | 0.00011982 | -25.37166537 |
| chr11 | 100525069 | 100525069 | + | 1.51E-08   | 4.24E-07   | -29.26195426 |
| chr11 | 100555968 | 100555968 | + | 7.25E-12   | 3.06E-10   | -26.03550296 |
| chr11 | 100657221 | 100657221 | - | 0          | 0          | -30.29208857 |
| chr11 | 100657227 | 100657227 | - | 0          | 0          | -40.96462397 |
| chr11 | 100657231 | 100657231 | - | 0          | 0          | -34.59390914 |
| chr11 | 100657706 | 100657706 | + | 0          | 0          | -26.9745775  |
| chr11 | 100673247 | 100673247 | + | 0          | 0          | -26.45973715 |
| chr11 | 100673476 | 100673476 | + | 0          | 0          | -27.54323115 |
| chr11 | 100673554 | 100673554 | + | 1.11E-16   | 7.26E-15   | -25.8392969  |
| chr11 | 100673555 | 100673555 | - | 0          | 0          | -26.83722642 |
| chr11 | 100846110 | 100846110 | - | 3.19E-07   | 7.19E-06   | -33.16645807 |
| chr11 | 101066803 | 101066803 | + | 4.94E-06   | 8.78E-05   | -31.18686869 |
| chr11 | 101140643 | 101140643 | - | 4.53E-08   | 1.18E-06   | -29.75460123 |
| chr11 | 101167530 | 101167530 | + | 3.80E-10   | 1.32E-08   | -29.35627081 |
| chr11 | 101168800 | 101168800 | - | 0.0008311  | 0.00758545 | -35.65072303 |
| chr11 | 101247071 | 101247071 | - | 0.00104463 | 0.00915244 | -26.76999617 |
| chr11 | 101276865 | 101276865 | + | 0          | 0          | -28.02189641 |
| chr11 | 101276882 | 101276882 | - | 0          | 0          | -25.053554   |
| chr11 | 101276905 | 101276905 | - | 0          | 0          | -25.96577987 |
| chr11 | 101521527 | 101521527 | + | 8.20E-05   | 0.00106143 | -45.47368421 |
| chr11 | 101657703 | 101657703 | + | 3.49E-06   | 6.43E-05   | -25.51956815 |
| chr11 | 101669119 | 101669119 | + | 3.64E-07   | 8.12E-06   | -27.71503684 |
| chr11 | 101673137 | 101673137 | - | 0          | 0          | -29.27334207 |
| chr11 | 101696051 | 101696051 | + | 1.52E-08   | 4.24E-07   | -35.1824088  |
| chr11 | 101696058 | 101696058 | + | 2.03E-11   | 8.19E-10   | -44.57215837 |
| chr11 | 101830308 | 101830308 | - | 0          | 0          | -32.1054701  |
| chr11 | 101830317 | 101830317 | - | 0          | 0          | -30.54082525 |
| chr11 | 101879305 | 101879305 | - | 1.51E-05   | 0.00023882 | -25.81068416 |
| chr11 | 101879352 | 101879352 | + | 0          | 0          | -25.17992968 |
| chr11 | 101879353 | 101879353 | - | 0          | 0          | -30.29935059 |



|       |           |           |   |            |            |              |
|-------|-----------|-----------|---|------------|------------|--------------|
| chr11 | 101896880 | 101896880 | - | 0          | 0          | -29.96500965 |
| chr11 | 101896937 | 101896937 | + | 4.79E-12   | 2.06E-10   | -25.22199497 |
| chr11 | 101897195 | 101897195 | - | 1.46E-09   | 4.72E-08   | -25.76272093 |
| chr11 | 101928467 | 101928467 | - | 0          | 0          | -39.58752515 |
| chr11 | 101946587 | 101946587 | - | 0.00064285 | 0.00613447 | -34.11764706 |
| chr11 | 101946592 | 101946592 | + | 0          | 0          | -34.47274421 |
| chr11 | 102070608 | 102070608 | + | 7.31E-05   | 0.00096089 | -29.16666667 |
| chr11 | 102070631 | 102070631 | + | 1.80E-05   | 0.00028021 | -31.37019231 |
| chr11 | 102070635 | 102070635 | + | 2.44E-07   | 5.62E-06   | -49.41305943 |
| chr11 | 102224736 | 102224736 | - | 0          | 0          | -53.4214394  |
| chr11 | 102224741 | 102224741 | - | 0          | 0          | -39.38710397 |
| chr11 | 102224758 | 102224758 | + | 0          | 0          | -38.7196468  |
| chr11 | 102224759 | 102224759 | - | 0          | 0          | -37.77934788 |
| chr11 | 102224783 | 102224783 | + | 1.11E-16   | 7.26E-15   | -31.74917492 |
| chr11 | 102224798 | 102224798 | + | 0          | 0          | -44.43708609 |
| chr11 | 102224808 | 102224808 | + | 2.37E-09   | 7.44E-08   | -28.08920863 |
| chr11 | 102224949 | 102224949 | - | 2.05E-13   | 1.01E-11   | -34.52991453 |
| chr11 | 102224968 | 102224968 | - | 2.02E-10   | 7.27E-09   | -25.84210526 |
| chr11 | 102224982 | 102224982 | - | 5.23E-10   | 1.79E-08   | -25.9702286  |
| chr11 | 102224987 | 102224987 | + | 0          | 0          | -40.15411908 |
| chr11 | 102224988 | 102224988 | - | 9.21E-12   | 3.84E-10   | -31.15842491 |
| chr11 | 102224999 | 102224999 | + | 0          | 0          | -42.45231677 |
| chr11 | 102225025 | 102225025 | + | 0          | 0          | -31.2371189  |
| chr11 | 102225029 | 102225029 | + | 0          | 0          | -43.69982081 |
| chr11 | 102225181 | 102225181 | - | 0          | 0          | -33.29083713 |
| chr11 | 102309819 | 102309819 | + | 0.00059911 | 0.00578523 | -25.40697674 |
| chr11 | 102320711 | 102320711 | - | 1.17E-08   | 3.33E-07   | -34.75378788 |
| chr11 | 102356878 | 102356878 | + | 3.61E-09   | 1.11E-07   | -25.74233426 |
| chr11 | 102399197 | 102399197 | - | 0          | 0          | -42.74322169 |
| chr11 | 102399211 | 102399211 | - | 0          | 0          | -29.3460925  |
| chr11 | 102399226 | 102399226 | + | 4.30E-08   | 1.12E-06   | -40.79016681 |
| chr11 | 102399422 | 102399422 | - | 3.10E-07   | 7.01E-06   | -25.46461473 |
| chr11 | 102399483 | 102399483 | + | 0          | 0          | -39.47368421 |
| chr11 | 102399484 | 102399484 | - | 4.49E-14   | 2.36E-12   | -38.66322345 |
| chr11 | 102399571 | 102399571 | - | 0          | 0          | -35.89640505 |
| chr11 | 102399576 | 102399576 | - | 0          | 0          | -29.41795814 |
| chr11 | 102399581 | 102399581 | - | 0          | 0          | -28.08651768 |
| chr11 | 102399586 | 102399586 | + | 1.82E-07   | 4.29E-06   | -34.59459459 |
| chr11 | 102399605 | 102399605 | + | 0.00028674 | 0.00311598 | -29.29886408 |
| chr11 | 102399629 | 102399629 | + | 0.00082295 | 0.00752401 | -26.71232877 |
| chr11 | 102399944 | 102399944 | - | 0          | 0          | -30.01463992 |

|       |           |           |   |            |            |              |
|-------|-----------|-----------|---|------------|------------|--------------|
| chr11 | 102437548 | 102437548 | - | 0          | 0          | -26.04417938 |
| chr11 | 102438102 | 102438102 | - | 0.00067359 | 0.00637741 | -28.77221993 |
| chr11 | 102438657 | 102438657 | + | 0          | 0          | -29.84018309 |
| chr11 | 102438673 | 102438673 | + | 0          | 0          | -33.23459796 |
| chr11 | 102438675 | 102438675 | + | 1.55E-15   | 9.35E-14   | -25.86376966 |
| chr11 | 102438685 | 102438685 | + | 0          | 0          | -25.18107322 |
| chr11 | 102438829 | 102438829 | - | 1.44E-10   | 5.25E-09   | -27.63684913 |
| chr11 | 102465855 | 102465855 | - | 0          | 0          | -29.49504724 |
| chr11 | 102466293 | 102466293 | + | 0          | 0          | -36.9017305  |
| chr11 | 102466294 | 102466294 | - | 0          | 0          | -35.78254986 |
| chr11 | 102466304 | 102466304 | + | 0          | 0          | -38.37826908 |
| chr11 | 102466305 | 102466305 | - | 0          | 0          | -37.83616128 |
| chr11 | 102466337 | 102466337 | - | 0          | 0          | -32.01810111 |
| chr11 | 102579558 | 102579558 | - | 1.20E-09   | 3.92E-08   | -31.46508639 |
| chr11 | 102579577 | 102579577 | - | 7.17E-08   | 1.81E-06   | -25.65433855 |
| chr11 | 102609100 | 102609100 | + | 0          | 0          | -31.16806127 |
| chr11 | 102610854 | 102610854 | + | 1.39E-06   | 2.79E-05   | -40.62835661 |
| chr11 | 102611077 | 102611077 | - | 1.02E-08   | 2.92E-07   | -28.58563652 |
| chr11 | 102624403 | 102624403 | + | 0          | 0          | -26.31529757 |
| chr11 | 102624404 | 102624404 | - | 0          | 0          | -25.41806854 |
| chr11 | 102741194 | 102741194 | + | 0          | 0          | -25.1298398  |
| chr11 | 102778200 | 102778200 | - | 0          | 0          | -25.26859405 |
| chr11 | 102778235 | 102778235 | - | 0          | 0          | -29.75262514 |
| chr11 | 102778337 | 102778337 | - | 0          | 0          | -25.4855126  |
| chr11 | 102778449 | 102778449 | - | 0          | 0          | -34.98458118 |
| chr11 | 102778464 | 102778464 | - | 0          | 0          | -29.66475096 |
| chr11 | 102998605 | 102998605 | + | 8.25E-11   | 3.10E-09   | -31.23486683 |
| chr11 | 103003404 | 103003404 | + | 0          | 0          | -26.08683552 |
| chr11 | 103177375 | 103177375 | + | 0          | 0          | -31.57517338 |
| chr11 | 103191970 | 103191970 | + | 0          | 0          | -28.57094308 |
| chr11 | 103192022 | 103192022 | - | 0          | 0          | -37.35327329 |
| chr11 | 103199435 | 103199435 | + | 0          | 0          | -25.56200223 |
| chr11 | 103199436 | 103199436 | - | 0          | 0          | -30.05153853 |
| chr11 | 103199464 | 103199464 | + | 0          | 0          | -26.66590202 |
| chr11 | 103199478 | 103199478 | - | 0          | 0          | -29.18766468 |
| chr11 | 103199558 | 103199558 | - | 0          | 0          | -27.19719292 |
| chr11 | 103199566 | 103199566 | + | 1.27E-07   | 3.07E-06   | -30.55555556 |
| chr11 | 103199582 | 103199582 | + | 2.66E-11   | 1.06E-09   | -37.24137931 |
| chr11 | 103199592 | 103199592 | + | 4.59E-08   | 1.19E-06   | -31.72413793 |
| chr11 | 103199746 | 103199746 | - | 5.75E-10   | 1.96E-08   | -29.03178769 |
| chr11 | 103775412 | 103775412 | - | 0          | 0          | -25.58026551 |

|       |           |           |   |            |            |              |
|-------|-----------|-----------|---|------------|------------|--------------|
| chr11 | 104132939 | 104132939 | - | 0.00030318 | 0.00326671 | 46.1038961   |
| chr11 | 104234614 | 104234614 | + | 1.24E-07   | 2.99E-06   | -52.98136646 |
| chr11 | 104302396 | 104302396 | - | 1.11E-16   | 7.26E-15   | -28.41170324 |
| chr11 | 104302429 | 104302429 | - | 4.88E-15   | 2.82E-13   | -25.78129117 |
| chr11 | 104685641 | 104685641 | + | 0          | 0          | -26.86973233 |
| chr11 | 104685754 | 104685754 | - | 0          | 0          | -27.80283825 |
| chr11 | 105153209 | 105153209 | - | 0.00114302 | 0.00984682 | 26.45847632  |
| chr11 | 105165277 | 105165277 | + | 1.34E-06   | 2.68E-05   | -26.008354   |
| chr11 | 105294124 | 105294124 | + | 0          | 0          | -27.36670543 |
| chr11 | 105294153 | 105294153 | + | 0          | 0          | -26.95127852 |
| chr11 | 105294154 | 105294154 | - | 0          | 0          | -29.17441896 |
| chr11 | 105294170 | 105294170 | - | 0          | 0          | -26.6303395  |
| chr11 | 105313404 | 105313404 | + | 0          | 0          | -34.94710194 |
| chr11 | 105313447 | 105313447 | + | 0          | 0          | -30.18447224 |
| chr11 | 105313593 | 105313593 | - | 0          | 0          | -26.46152376 |
| chr11 | 105313637 | 105313637 | + | 0          | 0          | -32.8493179  |
| chr11 | 105331886 | 105331886 | + | 3.64E-06   | 6.66E-05   | -31.78294574 |
| chr11 | 105450084 | 105450084 | - | 0.00067217 | 0.0063665  | -25.66666667 |
| chr11 | 106341453 | 106341453 | - | 1.97E-07   | 4.61E-06   | -37.88695325 |
| chr11 | 106364346 | 106364346 | - | 3.21E-07   | 7.24E-06   | -32.26415094 |
| chr11 | 106365329 | 106365329 | + | 0          | 0          | -37.98432082 |
| chr11 | 106365347 | 106365347 | + | 0          | 0          | -40.82881737 |
| chr11 | 106365352 | 106365352 | + | 0          | 0          | -37.61728395 |
| chr11 | 106365509 | 106365509 | - | 0          | 0          | -33.95444763 |
| chr11 | 106365517 | 106365517 | + | 0          | 0          | -30.13474621 |
| chr11 | 106365524 | 106365524 | + | 0          | 0          | -32.48232672 |
| chr11 | 106365576 | 106365576 | - | 0          | 0          | -27.06689114 |
| chr11 | 106595657 | 106595657 | + | 0          | 0          | -30.43993208 |
| chr11 | 106637532 | 106637532 | + | 2.50E-12   | 1.11E-10   | -26.40198511 |
| chr11 | 106637908 | 106637908 | + | 0          | 0          | -29.95010861 |
| chr11 | 106637952 | 106637952 | + | 0          | 0          | -35.21758655 |
| chr11 | 106638016 | 106638016 | - | 0          | 0          | -37.34593838 |
| chr11 | 106638026 | 106638026 | - | 0          | 0          | -27.34241338 |
| chr11 | 106742462 | 106742462 | + | 0          | 0          | -26.01260072 |
| chr11 | 106742463 | 106742463 | - | 0          | 0          | -31.70537527 |
| chr11 | 107029692 | 107029692 | + | 0          | 0          | -25.49695721 |
| chr11 | 107029709 | 107029709 | + | 0          | 0          | -28.61531709 |
| chr11 | 107029731 | 107029731 | + | 0          | 0          | -29.27215118 |
| chr11 | 107029793 | 107029793 | - | 0          | 0          | -25.51113152 |
| chr11 | 107029802 | 107029802 | - | 0          | 0          | -27.09740827 |
| chr11 | 107029807 | 107029807 | - | 0          | 0          | -28.21989155 |

|       |           |           |   |            |            |              |
|-------|-----------|-----------|---|------------|------------|--------------|
| chr11 | 107341547 | 107341547 | + | 0          | 0          | -33.98265925 |
| chr11 | 107371896 | 107371896 | + | 9.73E-14   | 4.96E-12   | -41.53495441 |
| chr11 | 107546589 | 107546589 | + | 0          | 0          | -40.11446251 |
| chr11 | 107546590 | 107546590 | - | 0          | 0          | -38.10311552 |
| chr11 | 107546630 | 107546630 | + | 0          | 0          | -46.65716203 |
| chr11 | 107676675 | 107676675 | - | 2.92E-09   | 9.03E-08   | -26.19755066 |
| chr11 | 107676722 | 107676722 | - | 1.26E-10   | 4.64E-09   | -25.82754584 |
| chr11 | 107676756 | 107676756 | + | 0          | 0          | -25.04485537 |
| chr11 | 108210152 | 108210152 | - | 0          | 0          | -32.9289001  |
| chr11 | 108342001 | 108342001 | - | 6.56E-09   | 1.93E-07   | -38.08108108 |
| chr11 | 109471404 | 109471404 | + | 1.95E-11   | 7.88E-10   | -33.71569951 |
| chr11 | 109569194 | 109569194 | - | 0          | 0          | -33.16934404 |
| chr11 | 110436995 | 110436995 | + | 0          | 0          | -26.32881746 |
| chr11 | 112197829 | 112197829 | + | 0          | 0          | -35.70323488 |
| chr11 | 112197833 | 112197833 | + | 0          | 0          | -32.47834777 |
| chr11 | 112197894 | 112197894 | - | 0          | 0          | -40.49914334 |
| chr11 | 112197907 | 112197907 | - | 0          | 0          | -30.0897216  |
| chr11 | 112197923 | 112197923 | - | 0          | 0          | -41.50099039 |
| chr11 | 113170308 | 113170308 | - | 7.82E-07   | 1.64E-05   | -33.58153388 |
| chr11 | 113192397 | 113192397 | + | 0          | 0          | -37.96815363 |
| chr11 | 113326588 | 113326588 | + | 0          | 0          | -32.05561306 |
| chr11 | 113380794 | 113380794 | + | 0          | 0          | -31.81487529 |
| chr11 | 113534378 | 113534378 | - | 0          | 0          | -41.61585366 |
| chr11 | 113621066 | 113621066 | - | 0.00018611 | 0.00215498 | -32.94871795 |
| chr11 | 113652039 | 113652039 | - | 0          | 0          | -28.12126653 |
| chr11 | 113652059 | 113652059 | - | 0          | 0          | -32.44489565 |
| chr11 | 113652086 | 113652086 | - | 0          | 0          | -29.22154391 |
| chr11 | 113706417 | 113706417 | + | 0          | 0          | -30.02164748 |
| chr11 | 113706457 | 113706457 | - | 0          | 0          | -39.00752398 |
| chr11 | 113706547 | 113706547 | - | 0          | 0          | -29.75384891 |
| chr11 | 113709302 | 113709302 | + | 0          | 0          | -31.79687941 |
| chr11 | 113709428 | 113709428 | - | 0          | 0          | -29.78694592 |
| chr11 | 113709502 | 113709502 | - | 8.24E-10   | 2.75E-08   | -28.74493927 |
| chr11 | 113709505 | 113709505 | - | 8.66E-12   | 3.63E-10   | -26.04588394 |
| chr11 | 113754288 | 113754288 | + | 2.33E-06   | 4.45E-05   | -28.68779995 |
| chr11 | 113754454 | 113754454 | + | 0.00046457 | 0.00467745 | -26.35017422 |
| chr11 | 113779364 | 113779364 | + | 0          | 0          | -36.74356983 |
| chr11 | 113779421 | 113779421 | - | 0          | 0          | -32.03309693 |
| chr11 | 113785920 | 113785920 | + | 0          | 0          | -59.11778539 |
| chr11 | 113785926 | 113785926 | + | 0          | 0          | -57.13758065 |
| chr11 | 113785927 | 113785927 | - | 0          | 0          | -54.12067023 |

|       |           |           |   |           |            |              |
|-------|-----------|-----------|---|-----------|------------|--------------|
| chr11 | 113785970 | 113785970 | - | 0         | 0          | -57.61341204 |
| chr11 | 113785976 | 113785976 | + | 2.56E-11  | 1.02E-09   | -48.23733863 |
| chr11 | 113786164 | 113786164 | - | 0         | 0          | -55.78276796 |
| chr11 | 113807280 | 113807280 | - | 0         | 0          | -28.24395895 |
| chr11 | 113807314 | 113807314 | + | 0         | 0          | -28.73624862 |
| chr11 | 113807349 | 113807349 | + | 0         | 0          | -30.77289023 |
| chr11 | 113807350 | 113807350 | - | 0         | 0          | -37.47931737 |
| chr11 | 113807363 | 113807363 | + | 0         | 0          | -25.62323828 |
| chr11 | 113807364 | 113807364 | - | 0         | 0          | -28.41904102 |
| chr11 | 113807386 | 113807386 | + | 0         | 0          | -32.45373767 |
| chr11 | 114217675 | 114217675 | + | 0         | 0          | -27.33536585 |
| chr11 | 114218628 | 114218628 | + | 1.11E-16  | 7.26E-15   | -29.60526316 |
| chr11 | 114431021 | 114431021 | - | 0.0004526 | 0.00457477 | -27.03540967 |
| chr11 | 114433668 | 114433668 | + | 3.85E-13  | 1.85E-11   | -33.33070245 |
| chr11 | 114472587 | 114472587 | + | 0         | 0          | -29.22612855 |
| chr11 | 114472590 | 114472590 | + | 0         | 0          | -28.98093686 |
| chr11 | 114472605 | 114472605 | - | 0         | 0          | -26.39738226 |
| chr11 | 114485545 | 114485545 | - | 0         | 0          | -26.17596615 |
| chr11 | 114639746 | 114639746 | - | 0         | 0          | -30.27819648 |
| chr11 | 114639753 | 114639753 | + | 2.98E-14  | 1.59E-12   | -29.00532125 |
| chr11 | 114639900 | 114639900 | - | 0         | 0          | -27.25054078 |
| chr11 | 114639909 | 114639909 | - | 0         | 0          | -34.3535729  |
| chr11 | 114639927 | 114639927 | - | 0         | 0          | -35.46986102 |
| chr11 | 114639931 | 114639931 | - | 0         | 0          | -31.29344967 |
| chr11 | 114667095 | 114667095 | - | 1.41E-08  | 3.97E-07   | -26.65369019 |
| chr11 | 114667118 | 114667118 | + | 0         | 0          | -31.03111074 |
| chr11 | 114667120 | 114667120 | + | 0         | 0          | -25.90067886 |
| chr11 | 114667129 | 114667129 | + | 0         | 0          | -34.50047609 |
| chr11 | 114667437 | 114667437 | + | 0         | 0          | -27.58431215 |
| chr11 | 114667512 | 114667512 | - | 0         | 0          | -27.69743911 |
| chr11 | 114789738 | 114789738 | + | 0         | 0          | -33.47874047 |
| chr11 | 114789793 | 114789793 | - | 0         | 0          | -26.30279786 |
| chr11 | 114789817 | 114789817 | - | 0         | 0          | -29.18473723 |
| chr11 | 114790393 | 114790393 | + | 0         | 0          | -27.00631182 |
| chr11 | 114830557 | 114830557 | + | 7.96E-06  | 0.00013475 | -25.50906243 |
| chr11 | 114830566 | 114830566 | - | 5.70E-06  | 1.00E-04   | -26.83090705 |
| chr11 | 114866678 | 114866678 | - | 1.81E-05  | 0.00028132 | -33.95372233 |
| chr11 | 114866693 | 114866693 | - | 2.79E-06  | 5.25E-05   | -32.93650794 |
| chr11 | 115151984 | 115151984 | + | 3.50E-12  | 1.53E-10   | -33.05319149 |
| chr11 | 115152001 | 115152001 | + | 2.88E-14  | 1.54E-12   | -35.70607553 |
| chr11 | 115152027 | 115152027 | + | 2.98E-08  | 7.97E-07   | -26.34532643 |

|       |           |           |   |            |            |              |
|-------|-----------|-----------|---|------------|------------|--------------|
| chr11 | 115152130 | 115152130 | - | 0          | 0          | -26.15300281 |
| chr11 | 115181747 | 115181747 | + | 2.14E-10   | 7.67E-09   | -40.62321326 |
| chr11 | 115181748 | 115181748 | - | 0          | 0          | -27.24323858 |
| chr11 | 115231549 | 115231549 | - | 0.00010579 | 0.00132357 | -41.17344313 |
| chr11 | 115231572 | 115231572 | - | 0.00065365 | 0.0062204  | -36.23262995 |
| chr11 | 115370468 | 115370468 | - | 6.66E-16   | 4.13E-14   | -34.32089003 |
| chr11 | 115436278 | 115436278 | + | 2.61E-13   | 1.27E-11   | -25.22316502 |
| chr11 | 115766954 | 115766954 | + | 4.47E-13   | 2.13E-11   | -29.81538462 |
| chr11 | 115766983 | 115766983 | + | 3.20E-10   | 1.12E-08   | -27.96913796 |
| chr11 | 115767199 | 115767199 | + | 0.0003638  | 0.00380932 | -30.70175439 |
| chr11 | 115797241 | 115797241 | + | 2.31E-12   | 1.03E-10   | -32.91102276 |
| chr11 | 115801071 | 115801071 | + | 0          | 0          | -51.04120931 |
| chr11 | 115801081 | 115801081 | + | 0          | 0          | -50.99255121 |
| chr11 | 115801085 | 115801085 | + | 0          | 0          | -46.79702048 |
| chr11 | 115801116 | 115801116 | + | 8.87E-11   | 3.32E-09   | -40.908414   |
| chr11 | 115801190 | 115801190 | - | 0          | 0          | -29.65175061 |
| chr11 | 115801210 | 115801210 | - | 0          | 0          | -28.28035067 |
| chr11 | 115801229 | 115801229 | - | 0          | 0          | -34.5821359  |
| chr11 | 115801236 | 115801236 | + | 4.47E-08   | 1.16E-06   | -43.46153846 |
| chr11 | 115801237 | 115801237 | - | 0          | 0          | -36.13349564 |
| chr11 | 115801262 | 115801262 | + | 0          | 0          | -33.49129555 |
| chr11 | 115801263 | 115801263 | - | 1.71E-05   | 0.00026789 | -35.03662068 |
| chr11 | 115801291 | 115801291 | + | 0          | 0          | -34.35678826 |
| chr11 | 115809480 | 115809480 | + | 0          | 0          | -36.50071681 |
| chr11 | 115809528 | 115809528 | + | 0          | 0          | -37.92825809 |
| chr11 | 115809559 | 115809559 | + | 4.26E-09   | 1.29E-07   | -47.49851102 |
| chr11 | 115809582 | 115809582 | + | 3.02E-05   | 0.00044248 | -38.58695652 |
| chr11 | 115809772 | 115809772 | - | 0.00042064 | 0.00430206 | -33.19148936 |
| chr11 | 115809774 | 115809774 | - | 0.00046857 | 0.00471097 | -33.4469697  |
| chr11 | 115809798 | 115809798 | - | 1.10E-10   | 4.08E-09   | -57.44047619 |
| chr11 | 115810613 | 115810613 | + | 1.50E-05   | 0.00023824 | -38.14035088 |
| chr11 | 115823524 | 115823524 | + | 0          | 0          | -27.47463178 |
| chr11 | 115883649 | 115883649 | + | 0          | 0          | -25.23813915 |
| chr11 | 115883737 | 115883737 | - | 0          | 0          | -26.59200787 |
| chr11 | 115886785 | 115886785 | + | 0          | 0          | 36.70351647  |
| chr11 | 115975556 | 115975556 | + | 9.57E-08   | 2.36E-06   | -25.07895597 |
| chr11 | 115975785 | 115975785 | - | 2.44E-15   | 1.44E-13   | -25.12249509 |
| chr11 | 115979155 | 115979155 | + | 1.68E-07   | 3.97E-06   | -25.81381381 |
| chr11 | 115989748 | 115989748 | + | 0          | 0          | -29.62432367 |
| chr11 | 115989762 | 115989762 | + | 0          | 0          | -28.31300253 |
| chr11 | 115989792 | 115989792 | + | 0          | 0          | -34.0972443  |

|       |           |           |   |            |            |              |
|-------|-----------|-----------|---|------------|------------|--------------|
| chr11 | 115989949 | 115989949 | - | 0          | 0          | -26.41286626 |
| chr11 | 116101702 | 116101702 | + | 0          | 0          | -29.87350256 |
| chr11 | 116103805 | 116103805 | - | 1.56E-08   | 4.35E-07   | -34.53358209 |
| chr11 | 116103816 | 116103816 | - | 3.70E-06   | 6.76E-05   | -31.39372822 |
| chr11 | 116103846 | 116103846 | - | 0.00023936 | 0.00267163 | -25.24905531 |
| chr11 | 116106339 | 116106339 | - | 0          | 0          | -52.54862445 |
| chr11 | 116106375 | 116106375 | - | 0          | 0          | -58.45640003 |
| chr11 | 116106384 | 116106384 | - | 0          | 0          | -51.65782493 |
| chr11 | 116106389 | 116106389 | + | 0          | 0          | -55.69105136 |
| chr11 | 116106406 | 116106406 | + | 0          | 0          | -50.8037794  |
| chr11 | 116106420 | 116106420 | + | 0          | 0          | -52.86136312 |
| chr11 | 116106451 | 116106451 | - | 0          | 0          | -30.51640446 |
| chr11 | 116106482 | 116106482 | + | 0          | 0          | -31.16186478 |
| chr11 | 116106483 | 116106483 | - | 0          | 0          | -33.52345539 |
| chr11 | 116106513 | 116106513 | + | 0          | 0          | -25.634334   |
| chr11 | 116106541 | 116106541 | + | 0          | 0          | -27.04052182 |
| chr11 | 116106656 | 116106656 | - | 0          | 0          | -43.50803761 |
| chr11 | 116106667 | 116106667 | - | 0          | 0          | -41.90705272 |
| chr11 | 116106705 | 116106705 | - | 0          | 0          | -37.30319141 |
| chr11 | 116107380 | 116107380 | + | 0          | 0          | -36.81525256 |
| chr11 | 116107884 | 116107884 | + | 2.41E-05   | 0.00036294 | -26.25492126 |
| chr11 | 116107912 | 116107912 | + | 1.97E-07   | 4.61E-06   | -26.2592176  |
| chr11 | 116108051 | 116108051 | - | 0          | 0          | -25.18270018 |
| chr11 | 116108260 | 116108260 | - | 3.50E-06   | 6.44E-05   | -38.77849211 |
| chr11 | 116108324 | 116108324 | + | 0          | 0          | -30.91631653 |
| chr11 | 116108332 | 116108332 | + | 0          | 0          | -34.66415678 |
| chr11 | 116108337 | 116108337 | + | 0          | 0          | -25.9116998  |
| chr11 | 116127410 | 116127410 | + | 1.28E-07   | 3.10E-06   | -28.61744621 |
| chr11 | 116127580 | 116127580 | - | 1.63E-06   | 3.22E-05   | -25.91194969 |
| chr11 | 116222982 | 116222982 | + | 0.00016961 | 0.00198964 | -25.90339233 |
| chr11 | 116223248 | 116223248 | + | 2.76E-13   | 1.35E-11   | -25.4272097  |
| chr11 | 116223268 | 116223268 | + | 5.55E-16   | 3.46E-14   | -27.173957   |
| chr11 | 116223276 | 116223276 | + | 0          | 0          | -31.02881817 |
| chr11 | 116232648 | 116232648 | + | 0          | 0          | -25.81356346 |
| chr11 | 116232783 | 116232783 | - | 0          | 0          | -28.005452   |
| chr11 | 116232848 | 116232848 | + | 0          | 0          | -26.83015058 |
| chr11 | 116232849 | 116232849 | - | 0          | 0          | -26.42761249 |
| chr11 | 116334534 | 116334534 | + | 0          | 0          | -28.87179325 |
| chr11 | 116431342 | 116431342 | + | 0.00016127 | 0.00190545 | -31.15808824 |
| chr11 | 116456667 | 116456667 | - | 0          | 0          | 30.32195874  |
| chr11 | 116498731 | 116498731 | - | 0          | 0          | -25.92616245 |

|       |           |           |   |            |            |              |
|-------|-----------|-----------|---|------------|------------|--------------|
| chr11 | 116498798 | 116498798 | - | 0          | 0          | -29.42687944 |
| chr11 | 116498831 | 116498831 | - | 0          | 0          | -27.28934366 |
| chr11 | 116498862 | 116498862 | - | 0          | 0          | -26.10231211 |
| chr11 | 116515667 | 116515667 | - | 0          | 0          | -44.05272942 |
| chr11 | 116515786 | 116515786 | - | 0          | 0          | -27.24227221 |
| chr11 | 116530832 | 116530832 | + | 2.54E-08   | 6.87E-07   | -25.78726723 |
| chr11 | 116589439 | 116589439 | + | 5.47E-05   | 0.00074571 | -41.47286822 |
| chr11 | 116589711 | 116589711 | - | 0.00045491 | 0.00459429 | -26.11111111 |
| chr11 | 116643915 | 116643915 | - | 2.42E-14   | 1.31E-12   | -30.5279736  |
| chr11 | 116644190 | 116644190 | + | 0          | 0          | -33.68279855 |
| chr11 | 116644191 | 116644191 | - | 5.48E-06   | 9.64E-05   | -27.86340686 |
| chr11 | 116647431 | 116647431 | - | 3.00E-15   | 1.76E-13   | -44.66230937 |
| chr11 | 116647469 | 116647469 | + | 5.80E-09   | 1.72E-07   | -25.17936633 |
| chr11 | 116647470 | 116647470 | - | 1.36E-12   | 6.19E-11   | -37.2694048  |
| chr11 | 116652839 | 116652839 | - | 2.44E-09   | 7.65E-08   | -42.49367089 |
| chr11 | 116652879 | 116652879 | - | 4.00E-15   | 2.32E-13   | -57.2988068  |
| chr11 | 116680675 | 116680675 | + | 0          | 0          | -25.54782096 |
| chr11 | 116680676 | 116680676 | - | 1.25E-10   | 4.61E-09   | -28.80990634 |
| chr11 | 116695010 | 116695010 | - | 3.33E-15   | 1.95E-13   | -25.90571931 |
| chr11 | 116695219 | 116695219 | - | 1.82E-07   | 4.28E-06   | -25.10262726 |
| chr11 | 116695221 | 116695221 | + | 0          | 0          | -25.96353087 |
| chr11 | 116695225 | 116695225 | + | 0          | 0          | -28.79547081 |
| chr11 | 116695426 | 116695426 | - | 2.12E-11   | 8.50E-10   | -36.17868361 |
| chr11 | 116756884 | 116756884 | + | 2.78E-10   | 9.83E-09   | 30.92414194  |
| chr11 | 116814317 | 116814317 | + | 2.64E-07   | 6.04E-06   | -29.11314985 |
| chr11 | 116814551 | 116814551 | - | 4.60E-07   | 1.01E-05   | -33.54658793 |
| chr11 | 116814588 | 116814588 | - | 2.07E-11   | 8.31E-10   | -41.15962777 |
| chr11 | 116814612 | 116814612 | + | 4.92E-09   | 1.47E-07   | -45.82417582 |
| chr11 | 116827532 | 116827532 | + | 0          | 0          | -27.59013125 |
| chr11 | 116827537 | 116827537 | + | 0          | 0          | -34.04120385 |
| chr11 | 116827546 | 116827546 | + | 0          | 0          | -32.02806758 |
| chr11 | 116827610 | 116827610 | - | 0          | 0          | -42.65141053 |
| chr11 | 116827724 | 116827724 | + | 0          | 0          | -31.03096992 |
| chr11 | 116939753 | 116939753 | + | 0          | 0          | -28.56708502 |
| chr11 | 116939788 | 116939788 | + | 0          | 0          | -27.12483339 |
| chr11 | 116939899 | 116939899 | - | 3.54E-09   | 1.08E-07   | -25.70842201 |
| chr11 | 117003860 | 117003860 | + | 2.78E-11   | 1.10E-09   | -25.01478415 |
| chr11 | 117091944 | 117091944 | + | 0          | 0          | -25.2390553  |
| chr11 | 117091964 | 117091964 | + | 0          | 0          | -29.38021118 |
| chr11 | 117091983 | 117091983 | + | 0          | 0          | -28.5068465  |
| chr11 | 117092073 | 117092073 | + | 0          | 0          | -29.05054523 |



|       |           |           |   |          |            |              |
|-------|-----------|-----------|---|----------|------------|--------------|
| chr11 | 117092074 | 117092074 | - | 0        | 0          | -25.91995457 |
| chr11 | 117092107 | 117092107 | + | 0        | 0          | -40.29913335 |
| chr11 | 117092229 | 117092229 | - | 0        | 0          | -41.80790073 |
| chr11 | 117092236 | 117092236 | - | 0        | 0          | -39.93365027 |
| chr11 | 117121295 | 117121295 | + | 0        | 0          | -39.40631279 |
| chr11 | 117121315 | 117121315 | + | 0        | 0          | -30.44112154 |
| chr11 | 117195421 | 117195421 | - | 6.11E-05 | 0.00082297 | 26.24052004  |
| chr11 | 117199315 | 117199315 | - | 0        | 0          | -27.98750214 |
| chr11 | 117222937 | 117222937 | - | 5.61E-05 | 0.00076288 | -40.79254079 |
| chr11 | 117231702 | 117231702 | - | 1.68E-08 | 4.68E-07   | -26.37096774 |
| chr11 | 117232265 | 117232265 | + | 0        | 0          | -27.41229235 |
| chr11 | 117232276 | 117232276 | + | 0        | 0          | -28.50791783 |
| chr11 | 117232283 | 117232283 | + | 0        | 0          | -29.79447737 |
| chr11 | 117232290 | 117232290 | + | 0        | 0          | -28.8286722  |
| chr11 | 117232302 | 117232302 | + | 0        | 0          | -26.55971091 |
| chr11 | 117232334 | 117232334 | - | 0        | 0          | -30.95610275 |
| chr11 | 117232336 | 117232336 | - | 0        | 0          | -31.53351921 |
| chr11 | 117232359 | 117232359 | - | 0        | 0          | -29.52406309 |
| chr11 | 117232364 | 117232364 | - | 0        | 0          | -25.34761859 |
| chr11 | 117233025 | 117233025 | - | 5.02E-08 | 1.30E-06   | -36.42435808 |
| chr11 | 117233036 | 117233036 | - | 5.32E-11 | 2.04E-09   | -44.31818182 |
| chr11 | 117233071 | 117233071 | + | 0        | 0          | -31.29281949 |
| chr11 | 117233072 | 117233072 | - | 0        | 0          | -29.98829092 |
| chr11 | 117233094 | 117233094 | + | 0        | 0          | -35.62412127 |
| chr11 | 117233095 | 117233095 | - | 0        | 0          | -30.82349532 |
| chr11 | 117233120 | 117233120 | + | 0        | 0          | -26.6890686  |
| chr11 | 117264807 | 117264807 | - | 1.03E-06 | 2.12E-05   | -28.28516378 |
| chr11 | 117264840 | 117264840 | - | 4.67E-10 | 1.61E-08   | -36.59839156 |
| chr11 | 117312842 | 117312842 | + | 1.51E-07 | 3.61E-06   | -28.03577948 |
| chr11 | 117317859 | 117317859 | - | 0        | 0          | -27.04007139 |
| chr11 | 117337917 | 117337917 | + | 0        | 0          | -27.23386828 |
| chr11 | 117345809 | 117345809 | - | 2.75E-14 | 1.48E-12   | -29.33333333 |
| chr11 | 117345822 | 117345822 | - | 0        | 0          | -33.38108883 |
| chr11 | 117345912 | 117345912 | - | 0        | 0          | -33.93166151 |
| chr11 | 117371627 | 117371627 | - | 0        | 0          | -27.32037132 |
| chr11 | 117425867 | 117425867 | + | 6.55E-15 | 3.73E-13   | -29.69654199 |
| chr11 | 117484322 | 117484322 | - | 0        | 0          | -41.686573   |
| chr11 | 117484355 | 117484355 | + | 0        | 0          | -32.66581002 |
| chr11 | 117484356 | 117484356 | - | 0        | 0          | -31.32534328 |
| chr11 | 117484404 | 117484404 | + | 0        | 0          | -40.53381963 |
| chr11 | 117540362 | 117540362 | - | 0        | 0          | -26.05295022 |

|       |           |           |   |            |            |              |
|-------|-----------|-----------|---|------------|------------|--------------|
| chr11 | 117626992 | 117626992 | - | 0          | 0          | -26.17594088 |
| chr11 | 117779167 | 117779167 | + | 0          | 0          | -27.75270129 |
| chr11 | 117836500 | 117836500 | + | 0          | 0          | -33.60417702 |
| chr11 | 117863690 | 117863690 | - | 0          | 0          | -25.46879477 |
| chr11 | 117870464 | 117870464 | - | 5.29E-06   | 9.34E-05   | -26.94435225 |
| chr11 | 117870473 | 117870473 | + | 0          | 0          | -35.25859873 |
| chr11 | 117889059 | 117889059 | + | 0          | 0          | -33.13818688 |
| chr11 | 117889060 | 117889060 | - | 0          | 0          | -27.72864338 |
| chr11 | 117889320 | 117889320 | - | 0          | 0          | -46.78384572 |
| chr11 | 117889329 | 117889329 | - | 0          | 0          | -31.19037564 |
| chr11 | 117889335 | 117889335 | - | 0          | 0          | -27.22526408 |
| chr11 | 117892645 | 117892645 | - | 0.00078346 | 0.00722438 | -30.39215686 |
| chr11 | 117930559 | 117930559 | + | 0          | 0          | -30.07736408 |
| chr11 | 117930580 | 117930580 | + | 0          | 0          | -33.43285749 |
| chr11 | 117930581 | 117930581 | - | 0          | 0          | -32.24200681 |
| chr11 | 117930620 | 117930620 | - | 0          | 0          | -35.78297095 |
| chr11 | 117930629 | 117930629 | - | 0          | 0          | -25.69840535 |
| chr11 | 117963182 | 117963182 | + | 0          | 0          | -33.04439191 |
| chr11 | 117967759 | 117967759 | + | 0          | 0          | -46.62827994 |
| chr11 | 117967787 | 117967787 | + | 4.44E-15   | 2.57E-13   | -47.53968254 |
| chr11 | 117967788 | 117967788 | - | 1.11E-16   | 7.26E-15   | -44.29046195 |
| chr11 | 117967795 | 117967795 | + | 2.04E-14   | 1.11E-12   | -45.72739187 |
| chr11 | 117967799 | 117967799 | + | 0          | 0          | -62.79161206 |
| chr11 | 117967808 | 117967808 | + | 0          | 0          | -54.42988204 |
| chr11 | 117975578 | 117975578 | + | 0          | 0          | -27.06603872 |
| chr11 | 117975579 | 117975579 | - | 0          | 0          | -25.25307809 |
| chr11 | 117975628 | 117975628 | + | 0          | 0          | -32.45420466 |
| chr11 | 118424780 | 118424780 | + | 0          | 0          | -25.7213407  |
| chr11 | 118424848 | 118424848 | - | 0          | 0          | -38.55385294 |
| chr11 | 118424883 | 118424883 | - | 0          | 0          | -36.14069387 |
| chr11 | 118479869 | 118479869 | + | 0          | 0          | -25.21273123 |
| chr11 | 118480033 | 118480033 | + | 0          | 0          | -26.3321856  |
| chr11 | 118503730 | 118503730 | + | 1.49E-07   | 3.56E-06   | -29.19047619 |
| chr11 | 119007649 | 119007649 | - | 0          | 0          | -26.52371293 |
| chr11 | 119007856 | 119007856 | - | 5.62E-10   | 1.91E-08   | -27.37152889 |
| chr11 | 119007878 | 119007878 | + | 0          | 0          | -26.86141278 |
| chr11 | 119037551 | 119037551 | - | 0          | 0          | -37.07120064 |
| chr11 | 119037569 | 119037569 | - | 2.54E-12   | 1.13E-10   | -35.34104507 |
| chr11 | 119037573 | 119037573 | - | 1.91E-11   | 7.70E-10   | -31.79601788 |
| chr11 | 119058817 | 119058817 | - | 8.99E-07   | 1.87E-05   | -30.22595528 |
| chr11 | 119078822 | 119078822 | + | 0          | 0          | -33.13593146 |

|       |           |           |   |            |            |              |
|-------|-----------|-----------|---|------------|------------|--------------|
| chr11 | 119078872 | 119078872 | + | 0          | 0          | -34.72633461 |
| chr11 | 119078924 | 119078924 | + | 0          | 0          | -34.90773726 |
| chr11 | 119078925 | 119078925 | - | 2.38E-12   | 1.06E-10   | -31.94248826 |
| chr11 | 119078947 | 119078947 | + | 0          | 0          | -28.93639909 |
| chr11 | 119078948 | 119078948 | - | 3.42E-11   | 1.34E-09   | -31.57392687 |
| chr11 | 119078962 | 119078962 | - | 2.31E-08   | 6.30E-07   | -25.39163574 |
| chr11 | 119079636 | 119079636 | + | 0          | 0          | -34.43291641 |
| chr11 | 119079686 | 119079686 | - | 0          | 0          | -34.40235537 |
| chr11 | 119083503 | 119083503 | + | 0          | 0          | -32.35291408 |
| chr11 | 119083504 | 119083504 | - | 1.15E-06   | 2.35E-05   | -28.07051437 |
| chr11 | 119105902 | 119105902 | - | 0          | 0          | -29.59429948 |
| chr11 | 119111704 | 119111704 | - | 0.00085531 | 0.00776726 | -37.10144928 |
| chr11 | 119127330 | 119127330 | + | 0          | 0          | -42.18905473 |
| chr11 | 119130157 | 119130157 | + | 1.42E-06   | 2.84E-05   | -29.05330463 |
| chr11 | 119134649 | 119134649 | - | 6.78E-06   | 0.00011679 | -28.10559006 |
| chr11 | 119198894 | 119198894 | - | 3.11E-05   | 0.00045404 | -27.05299942 |
| chr11 | 119249065 | 119249065 | - | 9.82E-06   | 0.00016278 | -28.77713303 |
| chr11 | 119314820 | 119314820 | - | 0.00043233 | 0.00440159 | -25.64102564 |
| chr11 | 119369032 | 119369032 | + | 6.79E-07   | 1.44E-05   | -27.93103448 |
| chr11 | 119374119 | 119374119 | + | 3.64E-08   | 9.62E-07   | -37.38636364 |
| chr11 | 119544037 | 119544037 | + | 3.00E-06   | 5.59E-05   | -37.62803235 |
| chr11 | 119912993 | 119912993 | + | 1.63E-12   | 7.38E-11   | -31.95166116 |
| chr11 | 119913229 | 119913229 | - | 0.00028578 | 0.00310731 | -36.25336927 |
| chr11 | 119932667 | 119932667 | - | 2.34E-05   | 0.00035381 | -27.95665393 |
| chr11 | 119955803 | 119955803 | - | 4.04E-05   | 0.00057285 | 44           |
| chr11 | 120012008 | 120012008 | + | 1.44E-05   | 0.0002286  | -39.61538462 |
| chr11 | 120012027 | 120012027 | + | 0.00033819 | 0.00358299 | -31.90394511 |
| chr11 | 120019957 | 120019957 | + | 1.11E-16   | 7.26E-15   | -25.96424295 |
| chr11 | 120020045 | 120020045 | - | 0          | 0          | -27.47804878 |
| chr11 | 120046685 | 120046685 | + | 0.00089279 | 0.00804722 | -29.09090909 |
| chr11 | 120046706 | 120046706 | + | 3.08E-08   | 8.22E-07   | -47.95918367 |
| chr11 | 120046707 | 120046707 | - | 2.57E-05   | 0.00038343 | -36.42533937 |
| chr11 | 120046710 | 120046710 | - | 0.00085737 | 0.00778274 | -33.49429324 |
| chr11 | 120046739 | 120046739 | + | 0          | 0          | -31.59038662 |
| chr11 | 120169285 | 120169285 | + | 6.57E-07   | 1.40E-05   | -26.19916908 |
| chr11 | 120169286 | 120169286 | - | 2.39E-09   | 7.50E-08   | -25.80352845 |
| chr11 | 120169307 | 120169307 | + | 5.57E-11   | 2.13E-09   | -34.30510178 |
| chr11 | 120169319 | 120169319 | + | 1.11E-16   | 7.26E-15   | -38.61654135 |
| chr11 | 120184985 | 120184985 | + | 0          | 0          | -43.99779736 |
| chr11 | 120184993 | 120184993 | + | 4.07E-14   | 2.15E-12   | -31.69603524 |
| chr11 | 120185021 | 120185021 | + | 0          | 0          | -41.18888688 |

|       |           |           |   |            |            |              |
|-------|-----------|-----------|---|------------|------------|--------------|
| chr11 | 120185023 | 120185023 | + | 0          | 0          | -44.21460177 |
| chr11 | 120185144 | 120185144 | - | 0          | 0          | -37.19261803 |
| chr11 | 120185168 | 120185168 | - | 0          | 0          | -28.12334154 |
| chr11 | 120186213 | 120186213 | - | 0          | 0          | -38.2205029  |
| chr11 | 120186426 | 120186426 | - | 2.99E-05   | 0.00043913 | -38.36477987 |
| chr11 | 120186441 | 120186441 | - | 1.13E-06   | 2.30E-05   | -41.34615385 |
| chr11 | 120186822 | 120186822 | + | 1.59E-10   | 5.78E-09   | -33.9193825  |
| chr11 | 120190981 | 120190981 | + | 6.15E-07   | 1.32E-05   | -26.19516003 |
| chr11 | 120199858 | 120199858 | + | 0          | 0          | -36.3725231  |
| chr11 | 120199956 | 120199956 | + | 0          | 0          | -30.84360184 |
| chr11 | 120199957 | 120199957 | - | 0          | 0          | -38.2378163  |
| chr11 | 120199987 | 120199987 | + | 0          | 0          | -32.61465211 |
| chr11 | 120199995 | 120199995 | + | 0          | 0          | -26.21899577 |
| chr11 | 120200068 | 120200068 | + | 0          | 0          | -45.55695248 |
| chr11 | 120200069 | 120200069 | - | 0          | 0          | -38.08012094 |
| chr11 | 120200113 | 120200113 | + | 0          | 0          | -45.97618635 |
| chr11 | 120221356 | 120221356 | - | 3.33E-16   | 2.11E-14   | -27.50578399 |
| chr11 | 120225954 | 120225954 | - | 4.53E-13   | 2.16E-11   | -38.3668412  |
| chr11 | 120225998 | 120225998 | + | 6.66E-16   | 4.13E-14   | -28.90478186 |
| chr11 | 120239028 | 120239028 | - | 0          | 0          | -38.32270428 |
| chr11 | 120239992 | 120239992 | - | 0.00035268 | 0.00371064 | -33.33333333 |
| chr11 | 120240003 | 120240003 | - | 4.38E-06   | 7.88E-05   | -48.14814815 |
| chr11 | 120240033 | 120240033 | - | 4.52E-06   | 8.10E-05   | -48.27586207 |
| chr11 | 120241012 | 120241012 | + | 0          | 0          | -52.75997151 |
| chr11 | 120241023 | 120241023 | + | 0          | 0          | -53.75940187 |
| chr11 | 120241024 | 120241024 | - | 0          | 0          | -50.04389709 |
| chr11 | 120241046 | 120241046 | + | 0          | 0          | -49.53653697 |
| chr11 | 120241047 | 120241047 | - | 0          | 0          | -53.89327774 |
| chr11 | 120241052 | 120241052 | + | 0          | 0          | -54.55235716 |
| chr11 | 120241059 | 120241059 | + | 0          | 0          | -47.65078671 |
| chr11 | 120241061 | 120241061 | + | 0          | 0          | -50.43094363 |
| chr11 | 120241065 | 120241065 | + | 0          | 0          | -47.20097324 |
| chr11 | 120241156 | 120241156 | - | 0          | 0          | -37.8313253  |
| chr11 | 120241164 | 120241164 | + | 0          | 0          | -35.18116006 |
| chr11 | 120241165 | 120241165 | - | 0          | 0          | -45.45714286 |
| chr11 | 120241183 | 120241183 | + | 0          | 0          | -48.57335367 |
| chr11 | 120241184 | 120241184 | - | 0          | 0          | -57.57202659 |
| chr11 | 120241197 | 120241197 | + | 0          | 0          | -48.737661   |
| chr11 | 120241198 | 120241198 | - | 0          | 0          | -49.02517294 |
| chr11 | 120241202 | 120241202 | + | 0          | 0          | -35.40562816 |
| chr11 | 120241203 | 120241203 | - | 0          | 0          | -37.32605301 |

|       |           |           |   |            |            |              |
|-------|-----------|-----------|---|------------|------------|--------------|
| chr11 | 120241209 | 120241209 | + | 0          | 0          | -47.65256102 |
| chr11 | 120241210 | 120241210 | - | 0          | 0          | -47.50687984 |
| chr11 | 120241248 | 120241248 | - | 0          | 0          | -48.8492144  |
| chr11 | 120269847 | 120269847 | - | 6.39E-10   | 2.16E-08   | -30.21423021 |
| chr11 | 120292815 | 120292815 | + | 0.00100802 | 0.00888933 | -25.13607125 |
| chr11 | 120306731 | 120306731 | - | 0          | 0          | -33.59142652 |
| chr11 | 120311384 | 120311384 | - | 4.25E-10   | 1.47E-08   | -27.47744906 |
| chr11 | 120350874 | 120350874 | + | 4.39E-14   | 2.31E-12   | -33.8042588  |
| chr11 | 120351043 | 120351043 | - | 1.96E-13   | 9.73E-12   | -27.24358974 |
| chr11 | 120519875 | 120519875 | + | 0          | 0          | -25.33134204 |
| chr11 | 120520027 | 120520027 | - | 0          | 0          | -28.64573216 |
| chr11 | 120647673 | 120647673 | + | 0.00037642 | 0.00392131 | -35.45597484 |
| chr11 | 120647959 | 120647959 | + | 8.05E-10   | 2.69E-08   | -31.8128655  |
| chr11 | 120666727 | 120666727 | + | 7.29E-14   | 3.77E-12   | -26.64230962 |
| chr11 | 120763576 | 120763576 | + | 0          | 0          | -28.43989909 |
| chr11 | 120949519 | 120949519 | - | 0          | 0          | -32.69151139 |
| chr11 | 120949525 | 120949525 | - | 0          | 0          | -34.83812529 |
| chr11 | 120958147 | 120958147 | + | 0          | 0          | -32.22719022 |
| chr11 | 120958184 | 120958184 | + | 0          | 0          | -26.33320785 |
| chr11 | 121014940 | 121014940 | + | 1.38E-09   | 4.48E-08   | -35          |
| chr11 | 121014946 | 121014946 | + | 1.15E-13   | 5.82E-12   | -40.94373866 |
| chr11 | 121014966 | 121014966 | + | 2.00E-11   | 8.04E-10   | -39.11166806 |
| chr11 | 121830323 | 121830323 | - | 0          | 0          | -26.93574427 |
| chr11 | 121830460 | 121830460 | + | 0          | 0          | -26.74128853 |
| chr11 | 121830471 | 121830471 | + | 0          | 0          | -29.91329902 |
| chr12 | 3366032   | 3366032   | + | 0          | 0          | -30.35879536 |
| chr12 | 3366089   | 3366089   | - | 0          | 0          | -28.04572502 |
| chr12 | 3366123   | 3366123   | - | 7.77E-16   | 4.79E-14   | -25.77739409 |
| chr12 | 3550295   | 3550295   | + | 1.37E-11   | 5.62E-10   | -32.12814645 |
| chr12 | 3550306   | 3550306   | + | 4.08E-07   | 9.02E-06   | -27.071331   |
| chr12 | 3550462   | 3550462   | - | 0          | 0          | -37.35277931 |
| chr12 | 3550496   | 3550496   | - | 0          | 0          | -33.86979167 |
| chr12 | 3871756   | 3871756   | + | 0          | 0          | -29.60502972 |
| chr12 | 3871776   | 3871776   | + | 0          | 0          | -31.49163476 |
| chr12 | 3871777   | 3871777   | - | 0          | 0          | -30.56171023 |
| chr12 | 3871919   | 3871919   | - | 0          | 0          | -26.07923912 |
| chr12 | 3883879   | 3883879   | - | 2.87E-11   | 1.14E-09   | -44.04008439 |
| chr12 | 3917578   | 3917578   | - | 0          | 0          | -27.43601257 |
| chr12 | 4055378   | 4055378   | - | 0.00026519 | 0.00291668 | -27.1541502  |
| chr12 | 4133995   | 4133995   | + | 0          | 0          | -32.54893847 |
| chr12 | 4133996   | 4133996   | - | 0          | 0          | -34.17510756 |

|       |          |          |   |            |            |              |
|-------|----------|----------|---|------------|------------|--------------|
| chr12 | 4134005  | 4134005  | + | 1.40E-07   | 3.36E-06   | -28.97179891 |
| chr12 | 4134006  | 4134006  | - | 0          | 0          | -30.99435536 |
| chr12 | 4188749  | 4188749  | + | 9.18E-05   | 0.00117098 | -29.40350877 |
| chr12 | 4188776  | 4188776  | + | 8.62E-06   | 0.00014491 | -34.42671395 |
| chr12 | 4665148  | 4665148  | - | 8.14E-09   | 2.37E-07   | -27.32138079 |
| chr12 | 4916695  | 4916695  | + | 1.09E-13   | 5.55E-12   | -25.81699346 |
| chr12 | 8304131  | 8304131  | + | 0.00081677 | 0.00747729 | -25.79113924 |
| chr12 | 8304153  | 8304153  | + | 4.64E-05   | 0.00064606 | -31.16902457 |
| chr12 | 8341227  | 8341227  | + | 0          | 0          | -31.00883594 |
| chr12 | 8341228  | 8341228  | - | 0          | 0          | -35.96434823 |
| chr12 | 8341263  | 8341263  | - | 0          | 0          | -25.98022034 |
| chr12 | 8447369  | 8447369  | + | 0          | 0          | -30.2891591  |
| chr12 | 8447370  | 8447370  | - | 0          | 0          | -29.24578622 |
| chr12 | 8477956  | 8477956  | - | 2.27E-08   | 6.20E-07   | -30.07270324 |
| chr12 | 8500927  | 8500927  | - | 1.87E-09   | 5.94E-08   | -36.0641093  |
| chr12 | 8500933  | 8500933  | - | 1.11E-16   | 7.26E-15   | -46.98826734 |
| chr12 | 8500947  | 8500947  | - | 1.77E-10   | 6.39E-09   | -36.61175969 |
| chr12 | 8773504  | 8773504  | + | 0          | 0          | -36.30827094 |
| chr12 | 8807807  | 8807807  | + | 0          | 0          | -26.87496531 |
| chr12 | 8807977  | 8807977  | - | 0          | 0          | -39.85532033 |
| chr12 | 8818105  | 8818105  | - | 0          | 0          | -25.19567535 |
| chr12 | 8912977  | 8912977  | - | 2.30E-05   | 0.00034838 | -28.57142857 |
| chr12 | 8913035  | 8913035  | - | 0          | 0          | -27.61845559 |
| chr12 | 8913045  | 8913045  | + | 0          | 0          | -25.04612393 |
| chr12 | 8913076  | 8913076  | + | 0          | 0          | -25.71807432 |
| chr12 | 8913083  | 8913083  | + | 0          | 0          | -28.81569138 |
| chr12 | 8913088  | 8913088  | + | 0          | 0          | -30.20847037 |
| chr12 | 8913116  | 8913116  | + | 0          | 0          | -26.13520408 |
| chr12 | 9575725  | 9575725  | - | 2.25E-08   | 6.14E-07   | -43.67363027 |
| chr12 | 11198046 | 11198046 | - | 3.44E-11   | 1.35E-09   | -27.86002439 |
| chr12 | 12541663 | 12541663 | + | 3.71E-11   | 1.45E-09   | -30.28139656 |
| chr12 | 12552030 | 12552030 | - | 0          | 0          | -28.72410608 |
| chr12 | 12581972 | 12581972 | - | 0          | 0          | -32.56497978 |
| chr12 | 12680480 | 12680480 | + | 0          | 0          | -25.85194376 |
| chr12 | 12680555 | 12680555 | + | 0          | 0          | -35.19944755 |
| chr12 | 12680556 | 12680556 | - | 0          | 0          | -26.69114839 |
| chr12 | 12680565 | 12680565 | + | 0          | 0          | -25.32084885 |
| chr12 | 12685096 | 12685096 | + | 0          | 0          | -29.17784843 |
| chr12 | 12685196 | 12685196 | + | 2.30E-11   | 9.20E-10   | -26.20803913 |
| chr12 | 12685224 | 12685224 | + | 5.27E-11   | 2.03E-09   | -26.08955939 |
| chr12 | 12725178 | 12725178 | + | 0          | 0          | -34.43813457 |

|       |          |          |   |          |            |              |
|-------|----------|----------|---|----------|------------|--------------|
| chr12 | 12725223 | 12725223 | + | 0        | 0          | -32.65029273 |
| chr12 | 12725275 | 12725275 | - | 0        | 0          | -31.15135618 |
| chr12 | 12725278 | 12725278 | - | 0        | 0          | -30.64359344 |
| chr12 | 12787794 | 12787794 | + | 1.28E-05 | 0.00020655 | -29.32565789 |
| chr12 | 12787822 | 12787822 | + | 7.15E-06 | 0.00012239 | -28.90682318 |
| chr12 | 12787824 | 12787824 | + | 1.35E-07 | 3.25E-06   | -39.37728938 |
| chr12 | 12787825 | 12787825 | - | 0        | 0          | -43.20133527 |
| chr12 | 12787874 | 12787874 | - | 0        | 0          | -38.60066834 |
| chr12 | 12810930 | 12810930 | + | 2.67E-09 | 8.30E-08   | -39.28747737 |
| chr12 | 12840874 | 12840874 | + | 5.82E-14 | 3.03E-12   | -25.71967441 |
| chr12 | 12841049 | 12841049 | - | 2.00E-13 | 9.89E-12   | -30.29537802 |
| chr12 | 12841235 | 12841235 | - | 0        | 0          | -29.02894208 |
| chr12 | 12842288 | 12842288 | + | 0        | 0          | -30.15474482 |
| chr12 | 12842341 | 12842341 | - | 0        | 0          | -32.4401503  |
| chr12 | 12904619 | 12904619 | + | 0        | 0          | -38.59609716 |
| chr12 | 12904655 | 12904655 | + | 0        | 0          | -34.00286555 |
| chr12 | 12904740 | 12904740 | - | 0        | 0          | -51.7997964  |
| chr12 | 12904760 | 12904760 | - | 0        | 0          | -32.65298003 |
| chr12 | 12904776 | 12904776 | - | 0        | 0          | -45.5961518  |
| chr12 | 12904788 | 12904788 | + | 6.74E-06 | 0.00011606 | -36.58170915 |
| chr12 | 12904789 | 12904789 | - | 0        | 0          | -42.18684598 |
| chr12 | 12904791 | 12904791 | + | 7.14E-05 | 0.00094136 | -34.27991886 |
| chr12 | 12904799 | 12904799 | + | 5.60E-08 | 1.44E-06   | -51.68067227 |
| chr12 | 12904803 | 12904803 | + | 1.03E-09 | 3.40E-08   | -55.31475748 |
| chr12 | 12904812 | 12904812 | + | 1.66E-07 | 3.92E-06   | -45.03657262 |
| chr12 | 14455852 | 14455852 | - | 9.31E-07 | 1.93E-05   | 45.83333333  |
| chr12 | 16056918 | 16056918 | - | 6.00E-09 | 1.78E-07   | -26.2301484  |
| chr12 | 16580614 | 16580614 | + | 0        | 0          | -28.29259421 |
| chr12 | 16789800 | 16789800 | + | 2.85E-06 | 5.34E-05   | -26.60408163 |
| chr12 | 17002323 | 17002323 | - | 0        | 0          | -30.27329184 |
| chr12 | 17727798 | 17727798 | - | 0        | 0          | -36.71416175 |
| chr12 | 17727828 | 17727828 | - | 0        | 0          | -26.85166809 |
| chr12 | 17728258 | 17728258 | + | 0        | 0          | -41.39699381 |
| chr12 | 17728259 | 17728259 | - | 0        | 0          | -34.08764747 |
| chr12 | 17728278 | 17728278 | + | 0        | 0          | -30.54010629 |
| chr12 | 17728279 | 17728279 | - | 0        | 0          | -31.56951312 |
| chr12 | 19044174 | 19044174 | + | 1.25E-13 | 6.30E-12   | 25.33631204  |
| chr12 | 19704042 | 19704042 | + | 0        | 0          | 27.91156061  |
| chr12 | 19704463 | 19704463 | + | 0        | 0          | 27.29447976  |
| chr12 | 21134450 | 21134450 | + | 8.31E-09 | 2.41E-07   | -27.39130435 |
| chr12 | 21136074 | 21136074 | - | 3.00E-07 | 6.80E-06   | -36.77777778 |

|       |          |          |   |            |            |              |
|-------|----------|----------|---|------------|------------|--------------|
| chr12 | 21136118 | 21136118 | - | 1.14E-09   | 3.73E-08   | -42.29922992 |
| chr12 | 21164401 | 21164401 | + | 0          | 0          | -29.82328815 |
| chr12 | 21164407 | 21164407 | + | 0          | 0          | -28.18744723 |
| chr12 | 21164435 | 21164435 | + | 0          | 0          | -29.05980667 |
| chr12 | 21164555 | 21164555 | - | 0          | 0          | -26.59269727 |
| chr12 | 21199352 | 21199352 | - | 3.87E-13   | 1.86E-11   | -25.22154197 |
| chr12 | 24699878 | 24699878 | + | 6.15E-09   | 1.82E-07   | -38.09334657 |
| chr12 | 24777073 | 24777073 | + | 0          | 0          | -28.72053872 |
| chr12 | 25092851 | 25092851 | + | 0          | 0          | -26.37450524 |
| chr12 | 25093254 | 25093254 | - | 1.29E-14   | 7.13E-13   | -35.64382139 |
| chr12 | 25125384 | 25125384 | + | 0          | 0          | -25.29468122 |
| chr12 | 25125556 | 25125556 | - | 0          | 0          | -38.15861991 |
| chr12 | 25215437 | 25215437 | - | 1.02E-09   | 3.37E-08   | -26.46115218 |
| chr12 | 25215479 | 25215479 | + | 7.19E-09   | 2.11E-07   | -25.6292637  |
| chr12 | 25215480 | 25215480 | - | 0          | 0          | -26.83288007 |
| chr12 | 25219560 | 25219560 | - | 3.33E-16   | 2.11E-14   | -31.59490869 |
| chr12 | 25267759 | 25267759 | - | 0.00024899 | 0.00276294 | -27.25040917 |
| chr12 | 26068160 | 26068160 | + | 0          | 0          | -29.97293307 |
| chr12 | 26068165 | 26068165 | + | 0          | 0          | -27.16022232 |
| chr12 | 26068197 | 26068197 | + | 0          | 0          | -31.44524443 |
| chr12 | 28122956 | 28122956 | + | 5.11E-08   | 1.32E-06   | -30.21641486 |
| chr12 | 28122965 | 28122965 | + | 6.37E-11   | 2.42E-09   | -36.35183382 |
| chr12 | 28552073 | 28552073 | + | 4.32E-05   | 0.00060743 | -28.04915515 |
| chr12 | 28552075 | 28552075 | + | 2.40E-06   | 4.57E-05   | -30.15873016 |
| chr12 | 28552084 | 28552084 | + | 5.72E-06   | 0.00010027 | -28.0646844  |
| chr12 | 28590647 | 28590647 | - | 4.04E-10   | 1.40E-08   | -28.96170962 |
| chr12 | 29083956 | 29083956 | + | 1.12E-05   | 0.00018295 | -33.49021084 |
| chr12 | 32204028 | 32204028 | - | 0          | 0          | -31.47022678 |
| chr12 | 32989920 | 32989920 | - | 0          | 0          | -25.12024303 |
| chr12 | 33033441 | 33033441 | + | 0          | 0          | -26.70766559 |
| chr12 | 33033519 | 33033519 | + | 0          | 0          | -32.56840247 |
| chr12 | 33034884 | 33034884 | + | 3.15E-10   | 1.10E-08   | -30.07816269 |
| chr12 | 33035064 | 33035064 | - | 9.99E-16   | 6.10E-14   | -26.88451334 |
| chr12 | 33214347 | 33214347 | + | 0          | 0          | -38.82947228 |
| chr12 | 33214472 | 33214472 | - | 0          | 0          | -25.11022535 |
| chr12 | 33395296 | 33395296 | - | 1.11E-16   | 7.26E-15   | -27.25250278 |
| chr12 | 34248243 | 34248243 | + | 0.0009116  | 0.00818586 | 30.60897436  |
| chr12 | 34351611 | 34351611 | + | 1.33E-05   | 0.00021387 | -30.51599587 |
| chr12 | 35178957 | 35178957 | + | 1.03E-09   | 3.39E-08   | -38.403452   |
| chr12 | 41315212 | 41315212 | - | 0          | 0          | -33.02380952 |
| chr12 | 42609460 | 42609460 | - | 0.00010896 | 0.00135738 | 38.0952381   |



|       |          |          |   |            |            |              |
|-------|----------|----------|---|------------|------------|--------------|
| chr12 | 44328485 | 44328485 | + | 4.63E-06   | 8.28E-05   | -27.51649287 |
| chr12 | 44328508 | 44328508 | + | 8.90E-07   | 1.85E-05   | -29.20185811 |
| chr12 | 45073424 | 45073424 | + | 4.66E-06   | 8.33E-05   | -25.71428571 |
| chr12 | 49400270 | 49400270 | + | 2.94E-05   | 0.00043247 | -25.85678462 |
| chr12 | 52129861 | 52129861 | + | 5.68E-12   | 2.42E-10   | -33.50820472 |
| chr12 | 52130054 | 52130054 | - | 8.45E-12   | 3.54E-10   | -25.9350197  |
| chr12 | 52745316 | 52745316 | - | 0.00017751 | 0.00206914 | -31.94254446 |
| chr12 | 52868183 | 52868183 | + | 0          | 0          | -30.02400065 |
| chr12 | 52944464 | 52944464 | + | 2.15E-05   | 0.00032814 | -30.43141593 |
| chr12 | 54201757 | 54201757 | - | 1.34E-06   | 2.69E-05   | -49.50265252 |
| chr12 | 55438503 | 55438503 | - | 4.04E-09   | 1.23E-07   | -26.54484993 |
| chr12 | 55493426 | 55493426 | - | 0          | 0          | -31.86196244 |
| chr12 | 55493438 | 55493438 | - | 0          | 0          | -36.1136651  |
| chr12 | 55493466 | 55493466 | + | 4.76E-07   | 1.04E-05   | -34.13945278 |
| chr12 | 55493467 | 55493467 | - | 0          | 0          | -32.60890563 |
| chr12 | 55493708 | 55493708 | - | 1.74E-09   | 5.55E-08   | -30.3907522  |
| chr12 | 56951906 | 56951906 | + | 8.73E-07   | 1.82E-05   | 36.66666667  |
| chr12 | 58269245 | 58269245 | - | 0          | 0          | -35.49586265 |
| chr12 | 69130148 | 69130148 | + | 3.00E-06   | 5.60E-05   | -26.25636672 |
| chr12 | 69446644 | 69446644 | - | 0          | 0          | -31.39843244 |
| chr12 | 69446653 | 69446653 | - | 4.79E-13   | 2.28E-11   | -26.76504434 |
| chr12 | 69446659 | 69446659 | - | 2.64E-14   | 1.42E-12   | -27.39920458 |
| chr12 | 69524942 | 69524942 | - | 0          | 0          | -25.86339688 |
| chr12 | 70266414 | 70266414 | + | 1.11E-16   | 7.26E-15   | -30.1933696  |
| chr12 | 70670747 | 70670747 | - | 1.11E-16   | 7.26E-15   | -26.91397468 |
| chr12 | 70967756 | 70967756 | - | 1.84E-11   | 7.45E-10   | -27.75946844 |
| chr12 | 71006347 | 71006347 | - | 0          | 0          | -42.16101653 |
| chr12 | 71111602 | 71111602 | - | 0.00012329 | 0.00151056 | -36.08597285 |
| chr12 | 71111614 | 71111614 | - | 4.24E-05   | 0.00059708 | -39.45409429 |
| chr12 | 71301458 | 71301458 | - | 2.09E-13   | 1.03E-11   | -26.76861442 |
| chr12 | 71301627 | 71301627 | - | 0          | 0          | -29.61972824 |
| chr12 | 72082659 | 72082659 | - | 0          | 0          | -31.59922929 |
| chr12 | 72082661 | 72082661 | - | 0          | 0          | -32.01186797 |
| chr12 | 72082668 | 72082668 | - | 0          | 0          | -32.39841176 |
| chr12 | 72082676 | 72082676 | - | 0          | 0          | -33.42643125 |
| chr12 | 72750179 | 72750179 | + | 0          | 0          | -30.34570917 |
| chr12 | 73345333 | 73345333 | + | 0          | 0          | -41.88311688 |
| chr12 | 73345367 | 73345367 | - | 6.93E-14   | 3.58E-12   | -27.56616394 |
| chr12 | 73367628 | 73367628 | - | 1.07E-13   | 5.41E-12   | -25.41518865 |
| chr12 | 73408353 | 73408353 | + | 0          | 0          | -25.33439184 |
| chr12 | 73408382 | 73408382 | + | 0          | 0          | -26.83417033 |

|       |          |          |   |            |            |              |
|-------|----------|----------|---|------------|------------|--------------|
| chr12 | 73408383 | 73408383 | - | 0          | 0          | -29.73641949 |
| chr12 | 73440855 | 73440855 | - | 2.03E-06   | 3.93E-05   | -25.05537099 |
| chr12 | 73537775 | 73537775 | + | 0          | 0          | -28.12870931 |
| chr12 | 73537809 | 73537809 | + | 0          | 0          | -27.15326942 |
| chr12 | 73537810 | 73537810 | - | 0          | 0          | -32.15666123 |
| chr12 | 73547798 | 73547798 | - | 7.67E-07   | 1.61E-05   | -35.36585366 |
| chr12 | 73547834 | 73547834 | - | 4.03E-09   | 1.22E-07   | -29.04505888 |
| chr12 | 73547940 | 73547940 | - | 2.22E-16   | 1.43E-14   | -25.04047491 |
| chr12 | 73636990 | 73636990 | - | 0          | 0          | -28.48521137 |
| chr12 | 73793474 | 73793474 | - | 0          | 0          | -25.2358804  |
| chr12 | 75845224 | 75845224 | + | 4.56E-13   | 2.18E-11   | -26.38026225 |
| chr12 | 75845243 | 75845243 | + | 0          | 0          | -36.13451087 |
| chr12 | 75845244 | 75845244 | - | 5.45E-13   | 2.58E-11   | -36.92397388 |
| chr12 | 75845259 | 75845259 | - | 1.34E-11   | 5.49E-10   | -32.87715196 |
| chr12 | 76081905 | 76081905 | - | 2.59E-13   | 1.27E-11   | -31.39802683 |
| chr12 | 76086324 | 76086324 | - | 1.38E-08   | 3.88E-07   | -36.0589403  |
| chr12 | 76215349 | 76215349 | - | 0.00015395 | 0.00183046 | -28.91130567 |
| chr12 | 76216864 | 76216864 | - | 0          | 0          | -33.07526965 |
| chr12 | 76216904 | 76216904 | - | 0          | 0          | -28.52827249 |
| chr12 | 76417756 | 76417756 | - | 0          | 0          | -25.66986181 |
| chr12 | 76485650 | 76485650 | - | 1.08E-11   | 4.46E-10   | -29.89497374 |
| chr12 | 76485722 | 76485722 | - | 8.44E-09   | 2.45E-07   | -30.28675916 |
| chr12 | 76546871 | 76546871 | + | 0          | 0          | -56.91005291 |
| chr12 | 76546890 | 76546890 | + | 0          | 0          | -55.4398827  |
| chr12 | 76547057 | 76547057 | - | 7.77E-16   | 4.79E-14   | -52.7908805  |
| chr12 | 76547073 | 76547073 | - | 5.33E-15   | 3.06E-13   | -53.5886107  |
| chr12 | 76547097 | 76547097 | - | 2.92E-12   | 1.29E-10   | -48.22666931 |
| chr12 | 76547103 | 76547103 | + | 0          | 0          | -33.98453961 |
| chr12 | 76547104 | 76547104 | - | 8.64E-12   | 3.62E-10   | -47.15886355 |
| chr12 | 76547115 | 76547115 | + | 0          | 0          | -44.05776515 |
| chr12 | 76547116 | 76547116 | - | 0          | 0          | -43.4310335  |
| chr12 | 76547141 | 76547141 | + | 0          | 0          | -37.13548952 |
| chr12 | 76547142 | 76547142 | - | 0          | 0          | -47.05616878 |
| chr12 | 76547206 | 76547206 | + | 0          | 0          | -35.27562313 |
| chr12 | 76547207 | 76547207 | - | 0          | 0          | -30.38511087 |
| chr12 | 76547344 | 76547344 | - | 0          | 0          | -32.19720192 |
| chr12 | 76597987 | 76597987 | - | 3.11E-06   | 5.78E-05   | -43.17948718 |
| chr12 | 76684937 | 76684937 | + | 0          | 0          | -27.10122079 |
| chr12 | 76867729 | 76867729 | + | 0          | 0          | -41.41191815 |
| chr12 | 76926062 | 76926062 | - | 0.00043717 | 0.00444301 | -33.33333333 |
| chr12 | 77018484 | 77018484 | + | 0          | 0          | -30.52650218 |

|       |          |          |   |            |            |              |
|-------|----------|----------|---|------------|------------|--------------|
| chr12 | 77124044 | 77124044 | + | 0          | 0          | -28.9240174  |
| chr12 | 78851347 | 78851347 | + | 0          | 0          | -28.97687681 |
| chr12 | 79797211 | 79797211 | + | 0          | 0          | -28.43955476 |
| chr12 | 79797272 | 79797272 | - | 1.11E-16   | 7.26E-15   | -26.39748182 |
| chr12 | 79848016 | 79848016 | - | 1.11E-16   | 7.26E-15   | -27.25970018 |
| chr12 | 79851454 | 79851454 | - | 1.43E-10   | 5.24E-09   | -26.05886008 |
| chr12 | 79970386 | 79970386 | - | 0          | 0          | -42.85194851 |
| chr12 | 79970393 | 79970393 | - | 0          | 0          | -33.36265045 |
| chr12 | 79970438 | 79970438 | + | 3.33E-06   | 6.15E-05   | -35.28597147 |
| chr12 | 79974787 | 79974787 | - | 2.26E-08   | 6.16E-07   | -29.37710438 |
| chr12 | 79975230 | 79975230 | + | 1.60E-10   | 5.80E-09   | -26.69268339 |
| chr12 | 80090712 | 80090712 | - | 1.89E-15   | 1.13E-13   | -55.03567788 |
| chr12 | 80131431 | 80131431 | + | 5.01E-09   | 1.50E-07   | -31.62469136 |
| chr12 | 80286047 | 80286047 | + | 0          | 0          | -33.11510911 |
| chr12 | 80923147 | 80923147 | + | 0          | 0          | -26.58501838 |
| chr12 | 80999023 | 80999023 | + | 0          | 0          | -25.69652462 |
| chr12 | 81028025 | 81028025 | + | 2.57E-06   | 4.87E-05   | -26.77714971 |
| chr12 | 81028049 | 81028049 | + | 2.13E-11   | 8.56E-10   | -36.72032193 |
| chr12 | 81485420 | 81485420 | - | 0.00017993 | 0.00209367 | -40.71428571 |
| chr12 | 81686506 | 81686506 | - | 0          | 0          | -27.10866612 |
| chr12 | 81803983 | 81803983 | + | 1.81E-06   | 3.55E-05   | -30.90909091 |
| chr12 | 81861892 | 81861892 | + | 0          | 0          | -27.44614537 |
| chr12 | 83073242 | 83073242 | + | 0          | 0          | -34.33962264 |
| chr12 | 84011545 | 84011545 | + | 5.89E-06   | 0.00010293 | -27.99417546 |
| chr12 | 84069537 | 84069537 | - | 4.43E-05   | 0.00062087 | -43.47826087 |
| chr12 | 84152709 | 84152709 | - | 0          | 0          | -25.41289578 |
| chr12 | 84178900 | 84178900 | - | 4.88E-15   | 2.82E-13   | -38.59186747 |
| chr12 | 84178927 | 84178927 | - | 9.91E-10   | 3.27E-08   | -27.40383108 |
| chr12 | 84190188 | 84190188 | - | 0          | 0          | -35.49401164 |
| chr12 | 84215960 | 84215960 | + | 0          | 0          | -30.44985775 |
| chr12 | 84671641 | 84671641 | + | 0          | 0          | -26.73959495 |
| chr12 | 84671881 | 84671881 | - | 0          | 0          | -29.28735013 |
| chr12 | 85140177 | 85140177 | + | 0.00011411 | 0.00141231 | -36.76316707 |
| chr12 | 85140205 | 85140205 | + | 2.29E-06   | 4.38E-05   | -44.15765609 |
| chr12 | 85140448 | 85140448 | + | 0          | 0          | -25.1194542  |
| chr12 | 85140514 | 85140514 | - | 0          | 0          | -29.57637046 |
| chr12 | 85140539 | 85140539 | + | 1.11E-16   | 7.26E-15   | -35.51985659 |
| chr12 | 85140540 | 85140540 | - | 8.07E-14   | 4.15E-12   | -25.76019749 |
| chr12 | 85140835 | 85140835 | - | 0          | 0          | -26.40680684 |
| chr12 | 85221607 | 85221607 | + | 0          | 0          | -26.58623861 |
| chr12 | 85289056 | 85289056 | + | 0          | 0          | -33.00604594 |

|       |          |          |   |            |            |              |
|-------|----------|----------|---|------------|------------|--------------|
| chr12 | 85437726 | 85437726 | - | 0          | 0          | -30.9504094  |
| chr12 | 85451794 | 85451794 | - | 1.59E-07   | 3.79E-06   | -27.42175857 |
| chr12 | 85452345 | 85452345 | + | 0          | 0          | -30.92928099 |
| chr12 | 85475617 | 85475617 | - | 1.76E-10   | 6.38E-09   | -48.86615044 |
| chr12 | 85475626 | 85475626 | - | 2.13E-09   | 6.73E-08   | -45.4180602  |
| chr12 | 85475662 | 85475662 | - | 9.41E-08   | 2.32E-06   | -31.91311612 |
| chr12 | 85973433 | 85973433 | + | 9.22E-08   | 2.28E-06   | -38.71362191 |
| chr12 | 86000777 | 86000777 | - | 0          | 0          | -31.72372387 |
| chr12 | 86439927 | 86439927 | - | 1.16E-06   | 2.36E-05   | -29.16666667 |
| chr12 | 86781925 | 86781925 | + | 0          | 0          | -30.21853928 |
| chr12 | 86781942 | 86781942 | + | 0          | 0          | -26.36763802 |
| chr12 | 86801724 | 86801724 | + | 0          | 0          | -31.20577612 |
| chr12 | 86801725 | 86801725 | - | 1.29E-08   | 3.63E-07   | -27.10581952 |
| chr12 | 86830002 | 86830002 | + | 9.53E-07   | 1.97E-05   | -27.14285714 |
| chr12 | 86830021 | 86830021 | - | 0.00042028 | 0.00429918 | -29.48717949 |
| chr12 | 86881885 | 86881885 | + | 0          | 0          | -32.08093131 |
| chr12 | 86881886 | 86881886 | - | 0          | 0          | -36.34695336 |
| chr12 | 86881900 | 86881900 | + | 0          | 0          | -29.03851892 |
| chr12 | 86881953 | 86881953 | - | 0          | 0          | -30.60417503 |
| chr12 | 86881961 | 86881961 | - | 0          | 0          | -33.80807789 |
| chr12 | 86881981 | 86881981 | + | 0          | 0          | -40.47461701 |
| chr12 | 86882017 | 86882017 | + | 0          | 0          | -53.3502502  |
| chr12 | 86882122 | 86882122 | + | 0          | 0          | -27.6752726  |
| chr12 | 86882125 | 86882125 | + | 0          | 0          | -34.9262794  |
| chr12 | 86882135 | 86882135 | + | 0          | 0          | -38.80152917 |
| chr12 | 86882167 | 86882167 | + | 0          | 0          | -46.99843681 |
| chr12 | 86882168 | 86882168 | - | 0          | 0          | -51.9965633  |
| chr12 | 86882195 | 86882195 | - | 0          | 0          | -30.50108225 |
| chr12 | 86882197 | 86882197 | + | 0          | 0          | -34.70722203 |
| chr12 | 86882200 | 86882200 | + | 0          | 0          | -34.50102803 |
| chr12 | 86882214 | 86882214 | + | 0          | 0          | -30.46960563 |
| chr12 | 86882221 | 86882221 | + | 0          | 0          | -27.35177866 |
| chr12 | 86882233 | 86882233 | + | 0          | 0          | -50.34821438 |
| chr12 | 86882238 | 86882238 | + | 0          | 0          | -30.56856187 |
| chr12 | 86882293 | 86882293 | - | 0          | 0          | -50.05350307 |
| chr12 | 86882317 | 86882317 | + | 0.00054    | 0.00530692 | -36          |
| chr12 | 86882337 | 86882337 | - | 0          | 0          | -39.63713503 |
| chr12 | 86882347 | 86882347 | + | 3.47E-07   | 7.77E-06   | -61.29032258 |
| chr12 | 86882348 | 86882348 | - | 0          | 0          | -30.36880196 |
| chr12 | 86882496 | 86882496 | + | 0          | 0          | -38.2473614  |
| chr12 | 86882513 | 86882513 | + | 0          | 0          | -42.00606431 |

|       |           |           |   |            |            |              |
|-------|-----------|-----------|---|------------|------------|--------------|
| chr12 | 86882659  | 86882659  | + | 1.49E-12   | 6.75E-11   | -62.35177866 |
| chr12 | 86911590  | 86911590  | - | 1.14E-09   | 3.74E-08   | -25.68505663 |
| chr12 | 86932391  | 86932391  | + | 0          | 0          | -28.40403208 |
| chr12 | 87026865  | 87026865  | - | 4.27E-06   | 7.70E-05   | -28.70387039 |
| chr12 | 91686048  | 91686048  | - | 0          | 0          | -25.40673749 |
| chr12 | 91686088  | 91686088  | - | 0          | 0          | -31.52027676 |
| chr12 | 95691584  | 95691584  | - | 7.46E-09   | 2.18E-07   | -27.75191376 |
| chr12 | 95697395  | 95697395  | - | 0          | 0          | -30.14679977 |
| chr12 | 98238673  | 98238673  | + | 1.55E-06   | 3.06E-05   | -27.40514905 |
| chr12 | 98684738  | 98684738  | - | 0          | 0          | -25.4135713  |
| chr12 | 99262479  | 99262479  | + | 0          | 0          | -25.94915084 |
| chr12 | 99285035  | 99285035  | + | 0          | 0          | -25.75741291 |
| chr12 | 99285063  | 99285063  | + | 0          | 0          | -25.3397069  |
| chr12 | 99285189  | 99285189  | - | 0          | 0          | -31.44324229 |
| chr12 | 99285193  | 99285193  | + | 0          | 0          | -32.05343589 |
| chr12 | 99294032  | 99294032  | - | 1.50E-08   | 4.20E-07   | -72.27011494 |
| chr12 | 99328806  | 99328806  | - | 0          | 0          | -25.20670612 |
| chr12 | 99330134  | 99330134  | - | 0          | 0          | -27.61943658 |
| chr12 | 99548651  | 99548651  | + | 4.36E-14   | 2.30E-12   | -28.37787154 |
| chr12 | 99953042  | 99953042  | - | 2.87E-09   | 8.89E-08   | -36.24517375 |
| chr12 | 99953062  | 99953062  | - | 1.68E-05   | 0.00026269 | -26.00671141 |
| chr12 | 99967855  | 99967855  | - | 1.17E-06   | 2.38E-05   | -29.81099656 |
| chr12 | 100223704 | 100223704 | + | 2.54E-06   | 4.81E-05   | -45.30364372 |
| chr12 | 100482504 | 100482504 | + | 0          | 0          | -28.95580558 |
| chr12 | 100482505 | 100482505 | - | 0          | 0          | -31.40584527 |
| chr12 | 100482513 | 100482513 | + | 0          | 0          | -30.75741463 |
| chr12 | 100527743 | 100527743 | - | 3.12E-05   | 0.00045561 | -26.9930787  |
| chr12 | 100529268 | 100529268 | + | 0          | 0          | -35.52405011 |
| chr12 | 100529381 | 100529381 | - | 0          | 0          | -37.32727625 |
| chr12 | 100829618 | 100829618 | - | 0.00039608 | 0.00409101 | 28           |
| chr12 | 100908586 | 100908586 | + | 0          | 0          | -28.6522025  |
| chr12 | 100908594 | 100908594 | + | 0          | 0          | -26.61508351 |
| chr12 | 100908595 | 100908595 | - | 0          | 0          | -34.28912089 |
| chr12 | 100925100 | 100925100 | + | 0          | 0          | -26.28299824 |
| chr12 | 100925124 | 100925124 | + | 0          | 0          | -26.020588   |
| chr12 | 100925141 | 100925141 | + | 0          | 0          | -29.36637361 |
| chr12 | 100925251 | 100925251 | - | 0          | 0          | -27.963293   |
| chr12 | 100952566 | 100952566 | - | 0          | 0          | -27.77995463 |
| chr12 | 101012316 | 101012316 | - | 3.28E-12   | 1.44E-10   | -25.48431383 |
| chr12 | 101098030 | 101098030 | + | 8.85E-07   | 1.84E-05   | -29.1372549  |
| chr12 | 102284589 | 102284589 | + | 0          | 0          | -26.52961179 |

|       |           |           |   |            |            |              |
|-------|-----------|-----------|---|------------|------------|--------------|
| chr12 | 102368467 | 102368467 | + | 0          | 0          | -25.33193815 |
| chr12 | 102368604 | 102368604 | + | 0          | 0          | -31.20147975 |
| chr12 | 102368654 | 102368654 | + | 3.79E-08   | 9.99E-07   | -35.09794399 |
| chr12 | 102369236 | 102369236 | + | 0          | 0          | -33.65056494 |
| chr12 | 102369307 | 102369307 | - | 0          | 0          | -31.03123252 |
| chr12 | 102369342 | 102369342 | - | 0          | 0          | -25.69531721 |
| chr12 | 102426593 | 102426593 | - | 4.39E-05   | 0.00061633 | -25.64350064 |
| chr12 | 102524597 | 102524597 | - | 0          | 0          | -28.69677484 |
| chr12 | 102644228 | 102644228 | - | 0          | 0          | -34.27472935 |
| chr12 | 102644256 | 102644256 | - | 0          | 0          | -28.4323615  |
| chr12 | 102645420 | 102645420 | - | 2.46E-07   | 5.66E-06   | -28.8465082  |
| chr12 | 102685641 | 102685641 | + | 0          | 0          | -32.84615587 |
| chr12 | 102685659 | 102685659 | + | 0          | 0          | -44.71030436 |
| chr12 | 102685660 | 102685660 | - | 0          | 0          | -40.5830395  |
| chr12 | 103243699 | 103243699 | - | 4.49E-05   | 0.00062793 | 29.4991511   |
| chr12 | 103300661 | 103300661 | - | 0.00031572 | 0.0033806  | -31.81818182 |
| chr12 | 103314991 | 103314991 | - | 0          | 0          | -25.90708768 |
| chr12 | 103316245 | 103316245 | + | 0.00076887 | 0.00711302 | -29.41176471 |
| chr12 | 103376172 | 103376172 | + | 1.88E-06   | 3.67E-05   | -27.40998839 |
| chr12 | 104593714 | 104593714 | - | 9.33E-05   | 0.00118713 | -29.24466338 |
| chr12 | 104793786 | 104793786 | - | 0          | 0          | -29.44103955 |
| chr12 | 104793800 | 104793800 | - | 0          | 0          | -30.42960129 |
| chr12 | 105003348 | 105003348 | + | 0.00013219 | 0.00160503 | -49.52978056 |
| chr12 | 105332850 | 105332850 | + | 4.90E-06   | 8.72E-05   | 41.51747656  |
| chr12 | 105604913 | 105604913 | - | 0.00069751 | 0.00656137 | 41.25        |
| chr12 | 105935301 | 105935301 | + | 9.94E-11   | 3.70E-09   | -29.12339081 |
| chr12 | 105961009 | 105961009 | + | 2.88E-10   | 1.01E-08   | -41.87856772 |
| chr12 | 105961013 | 105961013 | + | 1.02E-06   | 2.09E-05   | -33.17073171 |
| chr12 | 105961183 | 105961183 | - | 4.83E-13   | 2.30E-11   | -26.01889339 |
| chr12 | 106583379 | 106583379 | - | 0.00026613 | 0.00292531 | -29.80085349 |
| chr12 | 108119403 | 108119403 | + | 0          | 0          | -29.96599724 |
| chr12 | 108213827 | 108213827 | + | 2.05E-06   | 3.97E-05   | -45.13888889 |
| chr12 | 108219255 | 108219255 | - | 0          | 0          | -39.29619105 |
| chr12 | 108219269 | 108219269 | - | 0          | 0          | -34.76898863 |
| chr12 | 108219279 | 108219279 | + | 0          | 0          | -37.57697258 |
| chr12 | 108219280 | 108219280 | - | 0          | 0          | -37.68432341 |
| chr12 | 108219286 | 108219286 | + | 0          | 0          | -32.78929968 |
| chr12 | 108219314 | 108219314 | + | 0          | 0          | -40.80806436 |
| chr12 | 108219373 | 108219373 | - | 0          | 0          | -42.8883949  |
| chr12 | 108266009 | 108266009 | - | 0          | 0          | -25.74590755 |
| chr12 | 108266144 | 108266144 | + | 0          | 0          | -31.55684455 |

|       |           |           |   |            |            |              |
|-------|-----------|-----------|---|------------|------------|--------------|
| chr12 | 108266228 | 108266228 | - | 0          | 0          | -38.95565585 |
| chr12 | 108276873 | 108276873 | - | 1.15E-07   | 2.80E-06   | -27.34320759 |
| chr12 | 108285178 | 108285178 | + | 0          | 0          | -38.09668824 |
| chr12 | 108285179 | 108285179 | - | 0          | 0          | -33.91753676 |
| chr12 | 108285183 | 108285183 | - | 0          | 0          | -37.61315385 |
| chr12 | 108285187 | 108285187 | + | 0          | 0          | -37.06771287 |
| chr12 | 108285351 | 108285351 | + | 0          | 0          | -41.05263158 |
| chr12 | 108285352 | 108285352 | - | 1.79E-10   | 6.46E-09   | -25.44940935 |
| chr12 | 108292311 | 108292311 | + | 1.44E-11   | 5.89E-10   | -28.60331584 |
| chr12 | 108292517 | 108292517 | - | 2.11E-06   | 4.06E-05   | -32.38390093 |
| chr12 | 108292547 | 108292547 | - | 1.56E-06   | 3.08E-05   | -37.32862484 |
| chr12 | 108317068 | 108317068 | - | 2.25E-12   | 1.00E-10   | -41.01454101 |
| chr12 | 108317113 | 108317113 | - | 4.60E-12   | 1.98E-10   | -47.98165138 |
| chr12 | 108352475 | 108352475 | + | 0.00024654 | 0.00273972 | -36.47696477 |
| chr12 | 108835299 | 108835299 | - | 9.91E-09   | 2.85E-07   | -45.93544026 |
| chr12 | 108835303 | 108835303 | - | 1.95E-06   | 3.79E-05   | -34.24995593 |
| chr12 | 108914146 | 108914146 | + | 4.66E-11   | 1.80E-09   | -25.6928839  |
| chr12 | 109052384 | 109052384 | - | 0          | 0          | -30.70872096 |
| chr12 | 109052565 | 109052565 | - | 0          | 0          | -26.83376799 |
| chr12 | 109448648 | 109448648 | - | 0          | 0          | -25.48159162 |
| chr12 | 109453875 | 109453875 | - | 7.59E-14   | 3.91E-12   | -39.32539683 |
| chr12 | 109453884 | 109453884 | - | 1.11E-16   | 7.26E-15   | -37.44024798 |
| chr12 | 109528870 | 109528870 | - | 3.05E-05   | 0.00044626 | -35.14946962 |
| chr12 | 109540053 | 109540053 | + | 3.02E-08   | 8.08E-07   | -38.27349121 |
| chr12 | 109540102 | 109540102 | + | 2.25E-05   | 0.00034158 | -29.74383302 |
| chr12 | 109608081 | 109608081 | + | 5.58E-14   | 2.92E-12   | -29.7586443  |
| chr12 | 110167148 | 110167148 | - | 2.99E-07   | 6.79E-06   | -42.1875     |
| chr12 | 110699430 | 110699430 | - | 0.00103365 | 0.0090739  | -28.46497765 |
| chr12 | 111028883 | 111028883 | + | 0          | 0          | -25.09288977 |
| chr12 | 111028990 | 111028990 | + | 1.35E-05   | 0.00021711 | -34.18222977 |
| chr12 | 111028991 | 111028991 | - | 0          | 0          | -29.2744613  |
| chr12 | 111029275 | 111029275 | + | 0          | 0          | -25.24444866 |
| chr12 | 111199695 | 111199695 | - | 0          | 0          | -30.85388833 |
| chr12 | 111285795 | 111285795 | + | 0          | 0          | -27.13206665 |
| chr12 | 111285809 | 111285809 | + | 0          | 0          | -30.38765711 |
| chr12 | 111285843 | 111285843 | - | 0          | 0          | -25.6412836  |
| chr12 | 111375937 | 111375937 | + | 0.0003732  | 0.00389294 | -40.53483462 |
| chr12 | 111413169 | 111413169 | + | 0          | 0          | -43.97333747 |
| chr12 | 111413170 | 111413170 | - | 0          | 0          | -43.81387619 |
| chr12 | 111413176 | 111413176 | + | 0          | 0          | -34.98254096 |
| chr12 | 111413177 | 111413177 | - | 0          | 0          | -46.38345771 |

|       |           |           |   |          |            |              |
|-------|-----------|-----------|---|----------|------------|--------------|
| chr12 | 111445778 | 111445778 | + | 0        | 0          | -49.38224406 |
| chr12 | 111445792 | 111445792 | + | 0        | 0          | -43.0290563  |
| chr12 | 111445795 | 111445795 | + | 0        | 0          | -51.41945095 |
| chr12 | 111445810 | 111445810 | + | 0        | 0          | -44.92686485 |
| chr12 | 111445812 | 111445812 | + | 0        | 0          | -50.71186199 |
| chr12 | 111445816 | 111445816 | + | 0        | 0          | -37.85470922 |
| chr12 | 111445818 | 111445818 | + | 0        | 0          | -33.0974855  |
| chr12 | 111445821 | 111445821 | + | 0        | 0          | -43.86022758 |
| chr12 | 111445845 | 111445845 | - | 0        | 0          | -53.17091611 |
| chr12 | 111445848 | 111445848 | - | 0        | 0          | -54.45087395 |
| chr12 | 111445853 | 111445853 | - | 0        | 0          | -52.09899111 |
| chr12 | 111445865 | 111445865 | - | 0        | 0          | -50.08743314 |
| chr12 | 111445870 | 111445870 | - | 0        | 0          | -55.08791752 |
| chr12 | 111445878 | 111445878 | - | 0        | 0          | -56.20781667 |
| chr12 | 111445880 | 111445880 | - | 0        | 0          | -54.17403087 |
| chr12 | 111445886 | 111445886 | - | 0        | 0          | -55.95985361 |
| chr12 | 111446299 | 111446299 | - | 0        | 0          | -25.16761649 |
| chr12 | 111447300 | 111447300 | + | 3.22E-11 | 1.27E-09   | -28.30128205 |
| chr12 | 111447584 | 111447584 | - | 1.01E-06 | 2.07E-05   | -45.65217391 |
| chr12 | 111456002 | 111456002 | + | 0        | 0          | -26.70182053 |
| chr12 | 111670174 | 111670174 | - | 0        | 0          | -27.43573001 |
| chr12 | 111670578 | 111670578 | + | 2.62E-05 | 0.00039002 | -36.77944862 |
| chr12 | 111670582 | 111670582 | + | 2.75E-08 | 7.40E-07   | -50.43290043 |
| chr12 | 111670583 | 111670583 | - | 0        | 0          | -48.78306697 |
| chr12 | 111670589 | 111670589 | - | 0        | 0          | -45.67572839 |
| chr12 | 111670600 | 111670600 | + | 1.95E-10 | 7.03E-09   | -56.49350649 |
| chr12 | 111670601 | 111670601 | - | 0        | 0          | -49.53761771 |
| chr12 | 111670619 | 111670619 | - | 0        | 0          | -39.7214698  |
| chr12 | 111670627 | 111670627 | + | 0        | 0          | -38.19610855 |
| chr12 | 111670628 | 111670628 | - | 0        | 0          | -47.95626577 |
| chr12 | 111670666 | 111670666 | + | 0        | 0          | -44.08042578 |
| chr12 | 111670667 | 111670667 | - | 0        | 0          | -44.42785503 |
| chr12 | 111670669 | 111670669 | + | 7.18E-14 | 3.71E-12   | -43.69953052 |
| chr12 | 111670670 | 111670670 | - | 1.11E-16 | 7.26E-15   | -25.80498866 |
| chr12 | 111670687 | 111670687 | + | 0        | 0          | -63.33333333 |
| chr12 | 111670698 | 111670698 | + | 1.49E-14 | 8.19E-13   | -36.61904762 |
| chr12 | 111678936 | 111678936 | - | 0        | 0          | -26.90594493 |
| chr12 | 111693416 | 111693416 | + | 0        | 0          | -41.67785542 |
| chr12 | 111693424 | 111693424 | + | 0        | 0          | -36.62729819 |
| chr12 | 111693437 | 111693437 | + | 0        | 0          | -40.42194681 |
| chr12 | 111693531 | 111693531 | - | 0        | 0          | -44.92690031 |



|       |           |           |   |            |            |              |
|-------|-----------|-----------|---|------------|------------|--------------|
| chr12 | 111693548 | 111693548 | - | 0          | 0          | -33.15074496 |
| chr12 | 111696348 | 111696348 | - | 2.73E-13   | 1.33E-11   | -40.45647604 |
| chr12 | 111933132 | 111933132 | + | 0          | 0          | -29.23233216 |
| chr12 | 111937372 | 111937372 | + | 9.44E-09   | 2.72E-07   | -26.90348245 |
| chr12 | 112147334 | 112147334 | + | 3.44E-13   | 1.66E-11   | -26.36994949 |
| chr12 | 112151810 | 112151810 | + | 3.91E-08   | 1.03E-06   | -30.23820225 |
| chr12 | 112155682 | 112155682 | - | 1.48E-05   | 0.00023544 | -25.01635056 |
| chr12 | 112344741 | 112344741 | - | 7.00E-08   | 1.77E-06   | -28.98571028 |
| chr12 | 112450053 | 112450053 | + | 4.77E-15   | 2.75E-13   | -25.48541877 |
| chr12 | 112472284 | 112472284 | - | 0          | 0          | -30.81049086 |
| chr12 | 112576572 | 112576572 | - | 7.42E-10   | 2.49E-08   | -35.4220659  |
| chr12 | 112576943 | 112576943 | + | 0          | 0          | -28.72544389 |
| chr12 | 112577019 | 112577019 | + | 3.33E-16   | 2.11E-14   | -26.29035647 |
| chr12 | 112577020 | 112577020 | - | 0          | 0          | -28.47021696 |
| chr12 | 112577086 | 112577086 | - | 0          | 0          | -28.78965662 |
| chr12 | 112580184 | 112580184 | + | 3.33E-16   | 2.11E-14   | -31.25319693 |
| chr12 | 112580227 | 112580227 | + | 2.33E-15   | 1.38E-13   | -30.0811359  |
| chr12 | 112652668 | 112652668 | + | 3.67E-05   | 0.00052545 | -35.33333333 |
| chr12 | 112671676 | 112671676 | + | 8.86E-06   | 0.00014841 | -30.51295611 |
| chr12 | 112701008 | 112701008 | + | 0.00092349 | 0.00827352 | 26.12903226  |
| chr12 | 112701052 | 112701052 | - | 0          | 0          | -26.84658367 |
| chr12 | 112721547 | 112721547 | + | 0          | 0          | -39.39710941 |
| chr12 | 112721583 | 112721583 | - | 0          | 0          | -35.99830929 |
| chr12 | 112798083 | 112798083 | + | 3.40E-08   | 9.01E-07   | -27.54325966 |
| chr12 | 112866635 | 112866635 | + | 6.66E-16   | 4.13E-14   | -26.5884747  |
| chr12 | 112866776 | 112866776 | - | 1.51E-13   | 7.56E-12   | -37.31206306 |
| chr12 | 112866782 | 112866782 | - | 3.20E-07   | 7.22E-06   | -25.76207681 |
| chr12 | 112866790 | 112866790 | - | 1.17E-13   | 5.91E-12   | -35.66489362 |
| chr12 | 112867635 | 112867635 | - | 0.00030229 | 0.00325823 | 28.35443038  |
| chr12 | 112874265 | 112874265 | + | 0.00045284 | 0.00457674 | -47.00854701 |
| chr12 | 112930315 | 112930315 | + | 1.01E-09   | 3.34E-08   | -25.21157521 |
| chr12 | 112930450 | 112930450 | + | 0          | 0          | -28.39560655 |
| chr12 | 112930451 | 112930451 | - | 0          | 0          | -26.24778086 |
| chr12 | 112930482 | 112930482 | + | 0          | 0          | -27.81098133 |
| chr12 | 112930483 | 112930483 | - | 0          | 0          | -30.01758843 |
| chr12 | 112932864 | 112932864 | + | 0          | 0          | -26.03131765 |
| chr12 | 112938149 | 112938149 | + | 0          | 0          | -33.5499257  |
| chr12 | 112938150 | 112938150 | - | 0          | 0          | -29.91118725 |
| chr12 | 112938164 | 112938164 | + | 0          | 0          | -27.15502107 |
| chr12 | 112938223 | 112938223 | - | 0          | 0          | -29.75814095 |
| chr12 | 112938963 | 112938963 | - | 0          | 0          | -34.05221146 |

|       |           |           |   |            |            |              |
|-------|-----------|-----------|---|------------|------------|--------------|
| chr12 | 112938992 | 112938992 | - | 0          | 0          | -36.2904504  |
| chr12 | 112949981 | 112949981 | + | 0          | 0          | -32.40644387 |
| chr12 | 112949982 | 112949982 | - | 0          | 0          | -38.38916319 |
| chr12 | 113187990 | 113187990 | - | 0          | 0          | -33.05699482 |
| chr12 | 113188133 | 113188133 | - | 0          | 0          | -39.62174853 |
| chr12 | 113188135 | 113188135 | - | 0          | 0          | -30.8946336  |
| chr12 | 113188137 | 113188137 | - | 0          | 0          | -44.45206132 |
| chr12 | 113188145 | 113188145 | - | 0          | 0          | -29.67190579 |
| chr12 | 113188156 | 113188156 | + | 0          | 0          | -37.21265823 |
| chr12 | 113188157 | 113188157 | - | 0          | 0          | -31.42502632 |
| chr12 | 113188186 | 113188186 | - | 5.40E-14   | 2.82E-12   | -27.73297491 |
| chr12 | 117150940 | 117150940 | - | 8.88E-08   | 2.20E-06   | -48.06451613 |
| chr12 | 117760647 | 117760647 | - | 9.57E-13   | 4.43E-11   | -32.58582503 |
| chr12 | 117788685 | 117788685 | + | 7.09E-12   | 3.00E-10   | -30.70118447 |
| chr12 | 117788735 | 117788735 | + | 0          | 0          | -27.90486367 |
| chr12 | 117788858 | 117788858 | + | 0          | 0          | -25.395189   |
| chr12 | 117788871 | 117788871 | + | 0          | 0          | -26.38288579 |
| chr12 | 117788876 | 117788876 | + | 0          | 0          | -34.9024182  |
| chr12 | 117788961 | 117788961 | - | 0          | 0          | -32.84714527 |
| chr12 | 117915514 | 117915514 | + | 8.77E-10   | 2.91E-08   | -28.34962622 |
| chr12 | 118095049 | 118095049 | + | 0          | 0          | 32.06493506  |
| chr12 | 118198332 | 118198332 | + | 3.35E-06   | 6.18E-05   | -26.4571949  |
| chr12 | 118520382 | 118520382 | + | 1.29E-08   | 3.66E-07   | -32.66756635 |
| chr12 | 118529567 | 118529567 | - | 0          | 0          | -26.75642595 |
| chr12 | 118530111 | 118530111 | - | 1.08E-05   | 0.00017769 | -28.75457875 |
| chr12 | 118530120 | 118530120 | - | 6.45E-06   | 0.0001117  | -27.24857685 |
| chr12 | 118703236 | 118703236 | + | 4.03E-07   | 8.92E-06   | -26.79127726 |
| chr13 | 3478912   | 3478912   | - | 0          | 0          | -27.03488126 |
| chr13 | 5832071   | 5832071   | + | 6.98E-06   | 0.00011976 | -28.07192807 |
| chr13 | 8866812   | 8866812   | - | 0          | 0          | -30.19965644 |
| chr13 | 9231574   | 9231574   | + | 3.59E-06   | 6.59E-05   | -35.50345996 |
| chr13 | 10045863  | 10045863  | - | 4.64E-10   | 1.59E-08   | -29.20014515 |
| chr13 | 10359490  | 10359490  | + | 1.57E-10   | 5.72E-09   | -29.50881707 |
| chr13 | 11716020  | 11716020  | - | 0.00031232 | 0.00334993 | -26.47416413 |
| chr13 | 12378332  | 12378332  | - | 0.00062111 | 0.00596126 | -26.83544304 |
| chr13 | 15571030  | 15571030  | - | 0          | 0          | -26.12259857 |
| chr13 | 15571040  | 15571040  | + | 1.11E-16   | 7.26E-15   | -25.80596289 |
| chr13 | 18125299  | 18125299  | + | 8.86E-13   | 4.11E-11   | -28.00356976 |
| chr13 | 18125323  | 18125323  | + | 1.79E-11   | 7.24E-10   | -29.10229401 |
| chr13 | 18218870  | 18218870  | - | 0.00020518 | 0.00234195 | -25.76785494 |
| chr13 | 19430185  | 19430185  | + | 0          | 0          | -28.15149159 |

|       |          |          |   |            |            |              |
|-------|----------|----------|---|------------|------------|--------------|
| chr13 | 19430186 | 19430186 | - | 0          | 0          | -28.91344045 |
| chr13 | 19697752 | 19697752 | - | 0          | 0          | -27.16863927 |
| chr13 | 19697769 | 19697769 | - | 0          | 0          | -29.71046443 |
| chr13 | 19697776 | 19697776 | - | 0          | 0          | -26.81415037 |
| chr13 | 20830072 | 20830072 | + | 0.00056377 | 0.00550036 | -27.27272727 |
| chr13 | 21171352 | 21171352 | - | 1.24E-06   | 2.51E-05   | -36.23262995 |
| chr13 | 21171358 | 21171358 | - | 6.56E-09   | 1.93E-07   | -40.3085554  |
| chr13 | 21883289 | 21883289 | + | 0.00043675 | 0.00443954 | -28.67132867 |
| chr13 | 21935988 | 21935988 | + | 0          | 0          | -29.0177566  |
| chr13 | 21936035 | 21936035 | - | 0          | 0          | -32.17291305 |
| chr13 | 21982121 | 21982121 | + | 0          | 0          | -35.0942754  |
| chr13 | 21982130 | 21982130 | + | 0          | 0          | -25.84229848 |
| chr13 | 21982242 | 21982242 | - | 4.01E-14   | 2.12E-12   | -25.63758389 |
| chr13 | 22018214 | 22018214 | + | 4.32E-08   | 1.13E-06   | -33.4890877  |
| chr13 | 24521317 | 24521317 | + | 3.74E-14   | 1.98E-12   | -31.69619311 |
| chr13 | 24521322 | 24521322 | + | 0          | 0          | -38.07434377 |
| chr13 | 24955399 | 24955399 | + | 6.63E-08   | 1.68E-06   | -28.85802469 |
| chr13 | 24955617 | 24955617 | - | 1.02E-07   | 2.51E-06   | -57.92792793 |
| chr13 | 24955627 | 24955627 | - | 9.95E-06   | 0.00016467 | -47.4801061  |
| chr13 | 29356295 | 29356295 | + | 6.49E-07   | 1.38E-05   | -26.36363636 |
| chr13 | 29356300 | 29356300 | + | 4.06E-06   | 7.35E-05   | -26.50163815 |
| chr13 | 29356319 | 29356319 | + | 5.65E-09   | 1.68E-07   | -30.60600611 |
| chr13 | 29356329 | 29356329 | + | 1.84E-07   | 4.33E-06   | -27.11591742 |
| chr13 | 30722995 | 30722995 | - | 0          | 0          | -31.12855177 |
| chr13 | 30723004 | 30723004 | - | 0          | 0          | -34.4379771  |
| chr13 | 31793610 | 31793610 | - | 0.00021429 | 0.00243052 | -27.41356084 |
| chr13 | 31794591 | 31794591 | - | 9.66E-07   | 1.99E-05   | -26.99805068 |
| chr13 | 31803774 | 31803774 | - | 0          | 0          | -28.44963306 |
| chr13 | 31803783 | 31803783 | + | 0          | 0          | -26.92307692 |
| chr13 | 31803784 | 31803784 | - | 0          | 0          | -27.36213302 |
| chr13 | 31811589 | 31811589 | + | 0          | 0          | -59.55436067 |
| chr13 | 31811646 | 31811646 | - | 0          | 0          | -58.63318087 |
| chr13 | 31811650 | 31811650 | - | 0          | 0          | -44.86326444 |
| chr13 | 31811653 | 31811653 | - | 0          | 0          | -49.6074146  |
| chr13 | 31811744 | 31811744 | + | 0          | 0          | -31.42727332 |
| chr13 | 31811760 | 31811760 | - | 0          | 0          | -41.4291084  |
| chr13 | 31811764 | 31811764 | - | 0          | 0          | -41.70135446 |
| chr13 | 31811799 | 31811799 | - | 0          | 0          | -33.16642735 |
| chr13 | 31811807 | 31811807 | + | 0          | 0          | -36.74033314 |
| chr13 | 31811848 | 31811848 | + | 0          | 0          | -29.47961227 |
| chr13 | 32611921 | 32611921 | - | 0.00031889 | 0.0034093  | -25.01075731 |

|       |          |          |   |            |            |              |
|-------|----------|----------|---|------------|------------|--------------|
| chr13 | 34102193 | 34102193 | - | 5.59E-05   | 0.00076085 | -41.98830409 |
| chr13 | 34287920 | 34287920 | + | 7.20E-06   | 0.00012329 | -30.60728745 |
| chr13 | 34287921 | 34287921 | - | 0          | 0          | -26.86123272 |
| chr13 | 34287963 | 34287963 | + | 4.00E-07   | 8.87E-06   | -34.77564103 |
| chr13 | 34651276 | 34651276 | + | 0          | 0          | -29.0502924  |
| chr13 | 34651286 | 34651286 | + | 0          | 0          | -33.06086224 |
| chr13 | 34651525 | 34651525 | - | 7.77E-16   | 4.79E-14   | -34.20062696 |
| chr13 | 34653275 | 34653275 | - | 0          | 0          | -33.5459903  |
| chr13 | 34653575 | 34653575 | - | 3.81E-07   | 8.48E-06   | -25.19558105 |
| chr13 | 34724870 | 34724870 | - | 0.00048436 | 0.00484377 | -45.70707071 |
| chr13 | 35967715 | 35967715 | + | 3.62E-14   | 1.92E-12   | -27.70379338 |
| chr13 | 36542022 | 36542022 | + | 4.16E-05   | 0.00058789 | -42.85714286 |
| chr13 | 37311232 | 37311232 | - | 0          | 0          | -27.00234278 |
| chr13 | 37311278 | 37311278 | + | 3.34E-11   | 1.31E-09   | -30.00730994 |
| chr13 | 37420785 | 37420785 | - | 0          | 0          | 25.19541323  |
| chr13 | 37508429 | 37508429 | - | 0          | 0          | -38.77508135 |
| chr13 | 37508448 | 37508448 | - | 0          | 0          | -27.45985918 |
| chr13 | 37558296 | 37558296 | - | 0          | 0          | -25.14568765 |
| chr13 | 37858750 | 37858750 | + | 0          | 0          | -29.34302806 |
| chr13 | 37858751 | 37858751 | - | 0          | 0          | -28.47511815 |
| chr13 | 38172130 | 38172130 | - | 0.00089509 | 0.00806347 | -34.45305771 |
| chr13 | 38816283 | 38816283 | + | 5.55E-16   | 3.46E-14   | 28.10256729  |
| chr13 | 40717242 | 40717242 | - | 2.12E-13   | 1.05E-11   | -37.08034704 |
| chr13 | 40717260 | 40717260 | - | 5.25E-11   | 2.02E-09   | -32.53909159 |
| chr13 | 40735078 | 40735078 | - | 0          | 0          | -34.11801235 |
| chr13 | 40735838 | 40735838 | + | 5.55E-16   | 3.46E-14   | -34.49760341 |
| chr13 | 40735861 | 40735861 | + | 0          | 0          | -60.6546081  |
| chr13 | 40736033 | 40736033 | - | 0          | 0          | -53.41021092 |
| chr13 | 40736046 | 40736046 | - | 4.25E-12   | 1.84E-10   | -47.57318952 |
| chr13 | 40756449 | 40756449 | - | 6.16E-05   | 0.0008289  | -42.48366013 |
| chr13 | 40756456 | 40756456 | - | 0.00015093 | 0.00179918 | -38.90122087 |
| chr13 | 40868392 | 40868392 | + | 1.75E-05   | 0.00027276 | -26.66666667 |
| chr13 | 41634469 | 41634469 | + | 6.66E-16   | 4.13E-14   | -31.60964912 |
| chr13 | 42526361 | 42526361 | - | 1.81E-11   | 7.34E-10   | -25.29183519 |
| chr13 | 43148972 | 43148972 | - | 4.89E-11   | 1.88E-09   | -27.64889617 |
| chr13 | 43161960 | 43161960 | - | 9.20E-06   | 0.00015354 | -26.33576642 |
| chr13 | 43179434 | 43179434 | - | 1.54E-09   | 4.96E-08   | -27.14880184 |
| chr13 | 43212554 | 43212554 | - | 0          | 0          | -29.83575273 |
| chr13 | 43244068 | 43244068 | - | 0          | 0          | -27.38536251 |
| chr13 | 43289213 | 43289213 | - | 4.64E-09   | 1.40E-07   | -26.97270717 |
| chr13 | 43503331 | 43503331 | + | 6.39E-12   | 2.71E-10   | -27.11439145 |

|       |          |          |   |            |            |              |
|-------|----------|----------|---|------------|------------|--------------|
| chr13 | 43503337 | 43503337 | + | 4.44E-16   | 2.79E-14   | -26.8452381  |
| chr13 | 43524812 | 43524812 | + | 8.13E-07   | 1.70E-05   | -30.08049006 |
| chr13 | 43544053 | 43544053 | - | 0          | 0          | 27.35388408  |
| chr13 | 43691293 | 43691293 | - | 2.50E-08   | 6.77E-07   | -25.5931504  |
| chr13 | 43797592 | 43797592 | + | 3.76E-06   | 6.87E-05   | -53.09597523 |
| chr13 | 43931222 | 43931222 | - | 3.21E-06   | 5.96E-05   | -27.21809827 |
| chr13 | 44100885 | 44100885 | + | 0          | 0          | -29.25257019 |
| chr13 | 44100923 | 44100923 | + | 0          | 0          | -29.7964875  |
| chr13 | 44100928 | 44100928 | + | 0          | 0          | -28.03030303 |
| chr13 | 44100930 | 44100930 | + | 0          | 0          | -35.46902121 |
| chr13 | 44100965 | 44100965 | - | 0          | 0          | -30.53906791 |
| chr13 | 44100985 | 44100985 | - | 0          | 0          | -25.69015362 |
| chr13 | 44209297 | 44209297 | + | 0          | 0          | -28.35522483 |
| chr13 | 44232352 | 44232352 | - | 3.04E-06   | 5.67E-05   | -29.13811007 |
| chr13 | 44454165 | 44454165 | + | 0          | 0          | -25.38671755 |
| chr13 | 44454236 | 44454236 | - | 1.89E-15   | 1.13E-13   | -28.302114   |
| chr13 | 44454280 | 44454280 | - | 0          | 0          | -30.66135317 |
| chr13 | 44550832 | 44550832 | + | 1.52E-14   | 8.36E-13   | -27.41723501 |
| chr13 | 44625025 | 44625025 | - | 0.00019052 | 0.00219833 | -25.71428571 |
| chr13 | 44701681 | 44701681 | + | 0          | 0          | -26.8350525  |
| chr13 | 44701682 | 44701682 | - | 0          | 0          | -28.20798778 |
| chr13 | 44729365 | 44729365 | + | 0          | 0          | -35.5036157  |
| chr13 | 45239348 | 45239348 | + | 0.00090637 | 0.00814753 | 26.21854094  |
| chr13 | 45445039 | 45445039 | - | 4.54E-06   | 8.14E-05   | -28.78953855 |
| chr13 | 45526614 | 45526614 | - | 1.09E-05   | 0.00017905 | -28.97981199 |
| chr13 | 45539252 | 45539252 | - | 1.47E-14   | 8.07E-13   | -27.22994224 |
| chr13 | 45820984 | 45820984 | - | 8.23E-09   | 2.39E-07   | -29.61578947 |
| chr13 | 45921280 | 45921280 | - | 1.27E-06   | 2.56E-05   | -27.64378479 |
| chr13 | 46503842 | 46503842 | + | 0          | 0          | -26.76152508 |
| chr13 | 46503888 | 46503888 | + | 0          | 0          | -29.91194876 |
| chr13 | 46504007 | 46504007 | - | 1.13E-06   | 2.29E-05   | -25.75011016 |
| chr13 | 46776811 | 46776811 | + | 5.24E-07   | 1.14E-05   | -37.31473409 |
| chr13 | 46872355 | 46872355 | + | 0          | 0          | -29.44347319 |
| chr13 | 46980217 | 46980217 | + | 0          | 0          | -28.20435018 |
| chr13 | 46980218 | 46980218 | - | 0          | 0          | -36.61081233 |
| chr13 | 47258583 | 47258583 | - | 0          | 0          | -33.04249021 |
| chr13 | 47258587 | 47258587 | - | 0          | 0          | -33.18940598 |
| chr13 | 47258590 | 47258590 | + | 0          | 0          | -25.35387306 |
| chr13 | 47277183 | 47277183 | + | 1.81E-05   | 0.00028092 | -27.71108443 |
| chr13 | 47382027 | 47382027 | - | 1.51E-05   | 0.00023948 | -46.66666667 |
| chr13 | 47974382 | 47974382 | - | 0.00018198 | 0.00211371 | 30.67473414  |

|       |          |          |   |            |            |              |
|-------|----------|----------|---|------------|------------|--------------|
| chr13 | 48717370 | 48717370 | - | 7.58E-06   | 0.00012897 | -28.96311067 |
| chr13 | 48724185 | 48724185 | - | 0.00035031 | 0.00369002 | -41.66666667 |
| chr13 | 48804679 | 48804679 | - | 1.24E-05   | 0.00020081 | -25.93095212 |
| chr13 | 49146655 | 49146655 | + | 0          | 0          | -27.7902669  |
| chr13 | 49148532 | 49148532 | - | 0.00032054 | 0.0034246  | -32.14285714 |
| chr13 | 49320009 | 49320009 | - | 3.56E-11   | 1.40E-09   | -32.14147287 |
| chr13 | 49320074 | 49320074 | + | 0          | 0          | -25.58292731 |
| chr13 | 49320075 | 49320075 | - | 0          | 0          | -26.08445215 |
| chr13 | 49722260 | 49722260 | + | 1.07E-14   | 5.94E-13   | -28.9345215  |
| chr13 | 49722266 | 49722266 | + | 4.05E-14   | 2.14E-12   | -28.4831273  |
| chr13 | 49722287 | 49722287 | - | 0          | 0          | -27.66298462 |
| chr13 | 51023449 | 51023449 | - | 0.00029487 | 0.00319018 | -36.0483871  |
| chr13 | 51419040 | 51419040 | - | 4.44E-16   | 2.79E-14   | -30.97499388 |
| chr13 | 51642486 | 51642486 | - | 0          | 0          | -33.97507981 |
| chr13 | 51737725 | 51737725 | - | 8.11E-08   | 2.02E-06   | -26.96902655 |
| chr13 | 51843911 | 51843911 | + | 2.89E-15   | 1.70E-13   | -34.47066536 |
| chr13 | 51843923 | 51843923 | + | 4.16E-10   | 1.44E-08   | -26.68317473 |
| chr13 | 51844044 | 51844044 | - | 0.00062598 | 0.00599957 | -29.6499239  |
| chr13 | 51844086 | 51844086 | + | 1.20E-08   | 3.40E-07   | -39.52142787 |
| chr13 | 51844087 | 51844087 | - | 0          | 0          | -31.58085879 |
| chr13 | 51879042 | 51879042 | + | 0          | 0          | -27.90161353 |
| chr13 | 51879043 | 51879043 | - | 0          | 0          | -26.80016688 |
| chr13 | 51879067 | 51879067 | - | 0          | 0          | -30.40120866 |
| chr13 | 51911504 | 51911504 | - | 2.59E-05   | 0.00038695 | -26.51851852 |
| chr13 | 51958340 | 51958340 | - | 8.74E-06   | 0.00014672 | -28.91607204 |
| chr13 | 51962397 | 51962397 | + | 2.19E-09   | 6.90E-08   | -31.74435028 |
| chr13 | 51962421 | 51962421 | + | 9.56E-10   | 3.16E-08   | -30.34967375 |
| chr13 | 52060200 | 52060200 | + | 0          | 0          | -34.47910357 |
| chr13 | 52060249 | 52060249 | + | 3.33E-16   | 2.11E-14   | -29.28844816 |
| chr13 | 52080069 | 52080069 | - | 0.00012916 | 0.00157286 | -25.21908471 |
| chr13 | 52083961 | 52083961 | + | 5.73E-08   | 1.47E-06   | -26.99294227 |
| chr13 | 52501791 | 52501791 | + | 0          | 0          | -27.68136511 |
| chr13 | 52577066 | 52577066 | - | 0          | 0          | -30.16566265 |
| chr13 | 52577102 | 52577102 | - | 0          | 0          | -34.14479219 |
| chr13 | 52577109 | 52577109 | + | 0          | 0          | -31.74070914 |
| chr13 | 52978115 | 52978115 | - | 4.67E-08   | 1.21E-06   | -36.58962421 |
| chr13 | 53090179 | 53090179 | - | 0.0003919  | 0.00405456 | 25.92592593  |
| chr13 | 53184362 | 53184362 | - | 3.01E-14   | 1.61E-12   | -33.32201087 |
| chr13 | 53205351 | 53205351 | + | 0          | 0          | -27.89028144 |
| chr13 | 53205414 | 53205414 | - | 0          | 0          | -31.86968977 |
| chr13 | 53222385 | 53222385 | + | 4.31E-06   | 7.77E-05   | 28.31168831  |

|       |          |          |   |            |            |              |
|-------|----------|----------|---|------------|------------|--------------|
| chr13 | 53234647 | 53234647 | + | 0          | 0          | -26.51481183 |
| chr13 | 53234648 | 53234648 | - | 0          | 0          | -25.95432435 |
| chr13 | 53234884 | 53234884 | + | 3.34E-13   | 1.62E-11   | -38.09460888 |
| chr13 | 53234885 | 53234885 | - | 8.01E-06   | 0.0001355  | -39.05674282 |
| chr13 | 53234962 | 53234962 | - | 0          | 0          | -28.42403946 |
| chr13 | 53235909 | 53235909 | + | 1.13E-05   | 0.00018443 | -30.61688312 |
| chr13 | 53277007 | 53277007 | - | 0          | 0          | -25.23454021 |
| chr13 | 53476366 | 53476366 | + | 3.55E-15   | 2.07E-13   | -32.62775982 |
| chr13 | 53809314 | 53809314 | - | 0.00048478 | 0.00484725 | 26.6798419   |
| chr13 | 54212138 | 54212138 | + | 1.11E-16   | 7.26E-15   | -26.24098441 |
| chr13 | 54212218 | 54212218 | - | 0          | 0          | -27.86534209 |
| chr13 | 54286085 | 54286085 | + | 0.00076488 | 0.00708296 | -30.54511278 |
| chr13 | 54322499 | 54322499 | - | 0          | 0          | -25.69025219 |
| chr13 | 54575847 | 54575847 | - | 0          | 0          | -30.64889361 |
| chr13 | 54986847 | 54986847 | + | 0.00044442 | 0.00450567 | -44.61538462 |
| chr13 | 55014729 | 55014729 | + | 2.93E-05   | 0.00043055 | -27.4829932  |
| chr13 | 55171642 | 55171642 | + | 1.80E-11   | 7.31E-10   | -28.23368947 |
| chr13 | 55171934 | 55171934 | - | 0          | 0          | -31.84926336 |
| chr13 | 55171938 | 55171938 | - | 7.44E-15   | 4.21E-13   | -28.49914313 |
| chr13 | 55209919 | 55209919 | + | 0          | 0          | -35.21751026 |
| chr13 | 55210056 | 55210056 | - | 0          | 0          | -44.47778384 |
| chr13 | 55210058 | 55210058 | - | 0          | 0          | -39.97169942 |
| chr13 | 55210072 | 55210072 | - | 0          | 0          | -43.30006055 |
| chr13 | 55210083 | 55210083 | - | 0          | 0          | -52.33209023 |
| chr13 | 55210100 | 55210100 | + | 0          | 0          | -31.69591164 |
| chr13 | 55210101 | 55210101 | - | 0          | 0          | -39.70375304 |
| chr13 | 55210132 | 55210132 | + | 0          | 0          | -55.74646075 |
| chr13 | 55210144 | 55210144 | + | 0          | 0          | -43.32860216 |
| chr13 | 55210148 | 55210148 | + | 0          | 0          | -29.00638651 |
| chr13 | 55210247 | 55210247 | - | 0          | 0          | -27.06371968 |
| chr13 | 55415171 | 55415171 | - | 0          | 0          | -48.99462606 |
| chr13 | 55488470 | 55488470 | - | 3.33E-16   | 2.11E-14   | -27.76190476 |
| chr13 | 55524668 | 55524668 | - | 0          | 0          | -27.99574371 |
| chr13 | 55524695 | 55524695 | + | 3.51E-09   | 1.08E-07   | -25.33507472 |
| chr13 | 55569842 | 55569842 | + | 0          | 0          | -35.46761134 |
| chr13 | 55569846 | 55569846 | + | 0          | 0          | -32.14171465 |
| chr13 | 55569855 | 55569855 | + | 0          | 0          | -33.8396346  |
| chr13 | 55825701 | 55825701 | + | 0          | 0          | -25.96725765 |
| chr13 | 55829098 | 55829098 | - | 1.15E-08   | 3.26E-07   | -30.71895425 |
| chr13 | 55962510 | 55962510 | - | 5.30E-12   | 2.27E-10   | -29.80453448 |
| chr13 | 55962537 | 55962537 | - | 6.35E-14   | 3.30E-12   | -33.93160033 |

|       |          |          |   |            |            |              |
|-------|----------|----------|---|------------|------------|--------------|
| chr13 | 55963025 | 55963025 | + | 2.82E-07   | 6.41E-06   | -27.66233766 |
| chr13 | 56032859 | 56032859 | - | 4.16E-10   | 1.44E-08   | -29.03652246 |
| chr13 | 56052912 | 56052912 | - | 3.17E-13   | 1.54E-11   | -32.25672878 |
| chr13 | 56052927 | 56052927 | - | 6.66E-16   | 4.13E-14   | -33.54098953 |
| chr13 | 56052989 | 56052989 | + | 0          | 0          | -34.50434143 |
| chr13 | 56052990 | 56052990 | - | 0          | 0          | -34.8868374  |
| chr13 | 56053013 | 56053013 | - | 0          | 0          | -32.37219518 |
| chr13 | 56066273 | 56066273 | + | 0          | 0          | -30.35736537 |
| chr13 | 56066302 | 56066302 | + | 0          | 0          | -27.79694036 |
| chr13 | 56066303 | 56066303 | - | 0          | 0          | -26.12294804 |
| chr13 | 56066326 | 56066326 | - | 0          | 0          | -28.26605737 |
| chr13 | 56075493 | 56075493 | - | 0.00033161 | 0.00352312 | 25.27761543  |
| chr13 | 56113636 | 56113636 | - | 0          | 0          | -30.4271202  |
| chr13 | 56113640 | 56113640 | - | 0          | 0          | -33.10026129 |
| chr13 | 56113664 | 56113664 | - | 0          | 0          | -25.09040795 |
| chr13 | 56116173 | 56116173 | - | 9.21E-07   | 1.91E-05   | -30.00889977 |
| chr13 | 56207959 | 56207959 | + | 0          | 0          | -25.74868539 |
| chr13 | 56208127 | 56208127 | - | 0          | 0          | -30.96676341 |
| chr13 | 56382448 | 56382448 | + | 1.76E-12   | 7.93E-11   | 28.81615694  |
| chr13 | 56437996 | 56437996 | + | 0          | 0          | -30.07744108 |
| chr13 | 56611459 | 56611459 | - | 4.15E-05   | 0.00058637 | -30.02866699 |
| chr13 | 56702519 | 56702519 | + | 0          | 0          | -33.00751187 |
| chr13 | 56702596 | 56702596 | + | 0          | 0          | -25.78849462 |
| chr13 | 56702597 | 56702597 | - | 0          | 0          | -29.50064641 |
| chr13 | 56766200 | 56766200 | - | 2.78E-08   | 7.48E-07   | -27.65986675 |
| chr13 | 57282981 | 57282981 | - | 0          | 0          | -26.68748303 |
| chr13 | 57316392 | 57316392 | - | 2.55E-07   | 5.86E-06   | -34.99403017 |
| chr13 | 57435888 | 57435888 | - | 5.58E-07   | 1.20E-05   | 38.2968002   |
| chr13 | 57984562 | 57984562 | + | 0          | 0          | -25.10606666 |
| chr13 | 58030435 | 58030435 | + | 3.97E-14   | 2.10E-12   | -25.24590164 |
| chr13 | 58030633 | 58030633 | - | 1.10E-13   | 5.60E-12   | -25.08609272 |
| chr13 | 58122962 | 58122962 | + | 1.24E-06   | 2.50E-05   | -34.79281486 |
| chr13 | 58123156 | 58123156 | - | 5.66E-15   | 3.24E-13   | -44.38549956 |
| chr13 | 59438085 | 59438085 | - | 0          | 0          | -34.29122795 |
| chr13 | 59438114 | 59438114 | - | 0          | 0          | -25.68782788 |
| chr13 | 59726237 | 59726237 | - | 0          | 0          | -35.058575   |
| chr13 | 59726389 | 59726389 | - | 0          | 0          | -32.72450533 |
| chr13 | 59726403 | 59726403 | - | 0          | 0          | -27.72740254 |
| chr13 | 59726525 | 59726525 | + | 0          | 0          | -27.86084142 |
| chr13 | 60124136 | 60124136 | - | 4.98E-12   | 2.14E-10   | -27.8926719  |
| chr13 | 60455363 | 60455363 | - | 0.00080277 | 0.00737003 | -25.74195564 |



|       |          |          |   |            |            |              |
|-------|----------|----------|---|------------|------------|--------------|
| chr13 | 60464168 | 60464168 | - | 2.36E-10   | 8.40E-09   | 40.32258065  |
| chr13 | 60537994 | 60537994 | - | 3.10E-05   | 0.00045234 | -39.13746631 |
| chr13 | 60718282 | 60718282 | - | 0.00027752 | 0.00303158 | 35.36585366  |
| chr13 | 61575881 | 61575881 | - | 0          | 0          | 30.13973821  |
| chr13 | 61586068 | 61586068 | - | 1.11E-16   | 7.26E-15   | 33.35616438  |
| chr13 | 62858440 | 62858440 | - | 4.14E-12   | 1.79E-10   | -27.8523447  |
| chr13 | 62887674 | 62887674 | + | 0          | 0          | -28.81856495 |
| chr13 | 62887705 | 62887705 | - | 3.55E-15   | 2.07E-13   | -25.80717125 |
| chr13 | 62945177 | 62945177 | + | 0.00062373 | 0.00598218 | -35.75091575 |
| chr13 | 62945521 | 62945521 | - | 7.78E-13   | 3.63E-11   | -32.94374318 |
| chr13 | 63272785 | 63272785 | + | 0          | 0          | -45.22689677 |
| chr13 | 63272822 | 63272822 | + | 0          | 0          | -61.3700919  |
| chr13 | 63272823 | 63272823 | - | 0          | 0          | -54.13525235 |
| chr13 | 63272853 | 63272853 | - | 0          | 0          | -61.55492403 |
| chr13 | 63514251 | 63514251 | + | 0          | 0          | 32.43923832  |
| chr13 | 63574330 | 63574330 | - | 1.11E-16   | 7.26E-15   | -31.540132   |
| chr13 | 63608965 | 63608965 | + | 0          | 0          | 37.8073727   |
| chr13 | 64035387 | 64035387 | + | 0          | 0          | -35.8544642  |
| chr13 | 64081592 | 64081592 | + | 0          | 0          | -29.59373767 |
| chr13 | 64081593 | 64081593 | - | 4.09E-08   | 1.07E-06   | -28.66755702 |
| chr13 | 64081668 | 64081668 | + | 5.44E-13   | 2.58E-11   | -50.96129838 |
| chr13 | 64081669 | 64081669 | - | 0          | 0          | -39.62515531 |
| chr13 | 64154428 | 64154428 | - | 6.27E-05   | 0.00084125 | -27.30107527 |
| chr13 | 64154437 | 64154437 | - | 0.00010326 | 0.00129663 | -27.61100688 |
| chr13 | 64162938 | 64162938 | + | 0          | 0          | -29.21648467 |
| chr13 | 64162939 | 64162939 | - | 0          | 0          | -29.60821443 |
| chr13 | 64162947 | 64162947 | + | 0          | 0          | -26.90443884 |
| chr13 | 64162966 | 64162966 | + | 0          | 0          | -38.57033267 |
| chr13 | 64163101 | 64163101 | - | 0          | 0          | -25.79617104 |
| chr13 | 65971823 | 65971823 | - | 5.64E-08   | 1.44E-06   | 25.15366842  |
| chr13 | 68073227 | 68073227 | + | 0          | 0          | 30.26387066  |
| chr13 | 68073228 | 68073228 | - | 2.66E-11   | 1.06E-09   | 28.44679634  |
| chr13 | 68788364 | 68788364 | + | 2.33E-05   | 0.00035189 | 26.92307692  |
| chr13 | 69447278 | 69447278 | + | 4.42E-05   | 0.00061984 | -31.05545617 |
| chr13 | 69481490 | 69481490 | + | 1.07E-07   | 2.62E-06   | -29.53303783 |
| chr13 | 69544119 | 69544119 | + | 1.26E-09   | 4.09E-08   | -35.69124424 |
| chr13 | 69544143 | 69544143 | + | 8.63E-09   | 2.50E-07   | -34.06682028 |
| chr13 | 69546027 | 69546027 | + | 0.00016977 | 0.0019912  | -31.03448276 |
| chr13 | 69703699 | 69703699 | - | 0          | 0          | -27.05008482 |
| chr13 | 69752160 | 69752160 | - | 1.18E-08   | 3.35E-07   | 27.53258294  |
| chr13 | 70232126 | 70232126 | + | 8.94E-06   | 0.0001497  | -25.51134772 |

|       |          |          |   |            |            |              |
|-------|----------|----------|---|------------|------------|--------------|
| chr13 | 70428887 | 70428887 | + | 0.00016122 | 0.00190494 | 43.49206349  |
| chr13 | 70823836 | 70823836 | + | 0.00061154 | 0.00588439 | 33.63499246  |
| chr13 | 71404079 | 71404079 | + | 0.00037631 | 0.00392036 | -25.5        |
| chr13 | 72121064 | 72121064 | + | 0          | 0          | -31.68232999 |
| chr13 | 73251936 | 73251936 | + | 5.90E-05   | 0.00079768 | -42.99895507 |
| chr13 | 73434397 | 73434397 | + | 7.22E-15   | 4.09E-13   | -41.01786201 |
| chr13 | 74591753 | 74591753 | - | 0.00082873 | 0.00756788 | -25.1988218  |
| chr13 | 74591789 | 74591789 | - | 1.61E-07   | 3.82E-06   | -32.75003557 |
| chr13 | 75685421 | 75685421 | + | 2.74E-11   | 1.09E-09   | -25.08559729 |
| chr13 | 76526279 | 76526279 | + | 5.47E-09   | 1.63E-07   | 25.80772262  |
| chr13 | 77171353 | 77171353 | - | 0          | 0          | -28.60004366 |
| chr13 | 80963558 | 80963558 | + | 3.09E-14   | 1.65E-12   | -31.05694232 |
| chr13 | 83423809 | 83423809 | - | 2.12E-05   | 0.00032415 | -31.6017316  |
| chr13 | 93856012 | 93856012 | + | 0          | 0          | -30.32329631 |
| chr13 | 93856067 | 93856067 | - | 0          | 0          | -29.21125291 |
| chr13 | 93856076 | 93856076 | - | 0          | 0          | -33.59226755 |
| chr13 | 93856092 | 93856092 | - | 0          | 0          | -39.40694841 |
| chr13 | 93856102 | 93856102 | - | 0          | 0          | -39.07534206 |
| chr13 | 93951219 | 93951219 | + | 0          | 0          | -26.45526696 |
| chr13 | 94136255 | 94136255 | + | 0          | 0          | -35.2409689  |
| chr13 | 94136297 | 94136297 | + | 0          | 0          | -50.49220876 |
| chr13 | 94136412 | 94136412 | - | 2.70E-08   | 7.27E-07   | -52.18926554 |
| chr13 | 94608645 | 94608645 | + | 0          | 0          | -28.77816507 |
| chr13 | 94608646 | 94608646 | - | 0          | 0          | -32.54253872 |
| chr13 | 94608667 | 94608667 | + | 0          | 0          | -37.18940386 |
| chr13 | 94608668 | 94608668 | - | 0          | 0          | -39.83199059 |
| chr13 | 94608688 | 94608688 | + | 0          | 0          | -30.93464778 |
| chr13 | 94608689 | 94608689 | - | 0          | 0          | -37.6516519  |
| chr13 | 94608751 | 94608751 | - | 0          | 0          | -26.25324825 |
| chr13 | 94706728 | 94706728 | + | 0          | 0          | -39.7647158  |
| chr13 | 94706911 | 94706911 | - | 0          | 0          | -37.75053105 |
| chr13 | 95494816 | 95494816 | + | 1.99E-08   | 5.47E-07   | -25.19559804 |
| chr13 | 95567361 | 95567361 | - | 0.00018162 | 0.00211007 | -45.27027027 |
| chr13 | 95567409 | 95567409 | + | 0          | 0          | -25.04822634 |
| chr13 | 95567457 | 95567457 | + | 0          | 0          | -27.69011674 |
| chr13 | 95616596 | 95616596 | - | 0.00069298 | 0.00652616 | -33.16283035 |
| chr13 | 95616612 | 95616612 | - | 0.00037717 | 0.00392783 | -35.39279869 |
| chr13 | 95960137 | 95960137 | + | 0          | 0          | -31.677848   |
| chr13 | 95960177 | 95960177 | + | 0          | 0          | -30.86902772 |
| chr13 | 95960185 | 95960185 | + | 0          | 0          | -27.34034863 |
| chr13 | 95990540 | 95990540 | + | 0          | 0          | -29.15266106 |

|       |           |           |   |            |            |              |
|-------|-----------|-----------|---|------------|------------|--------------|
| chr13 | 95990541  | 95990541  | - | 0          | 0          | -36.6482555  |
| chr13 | 95990566  | 95990566  | - | 0          | 0          | -28.0563284  |
| chr13 | 96925969  | 96925969  | + | 0          | 0          | -26.43904803 |
| chr13 | 96929162  | 96929162  | - | 5.43E-05   | 0.00074191 | -33.7401918  |
| chr13 | 97065119  | 97065119  | + | 8.97E-06   | 0.00015018 | -36.04696673 |
| chr13 | 97070083  | 97070083  | + | 1.33E-10   | 4.87E-09   | -26.69940553 |
| chr13 | 97249261  | 97249261  | + | 8.44E-15   | 4.75E-13   | -25.68785451 |
| chr13 | 97249372  | 97249372  | + | 2.78E-15   | 1.63E-13   | -27.4711123  |
| chr13 | 97259836  | 97259836  | + | 7.77E-16   | 4.79E-14   | -25.57264957 |
| chr13 | 97259837  | 97259837  | - | 0          | 0          | -25.85514785 |
| chr13 | 97259979  | 97259979  | - | 1.11E-16   | 7.26E-15   | -30.04840474 |
| chr13 | 97260026  | 97260026  | + | 5.66E-09   | 1.68E-07   | -54.61835462 |
| chr13 | 97291281  | 97291281  | - | 0          | 0          | -30.79062401 |
| chr13 | 97365843  | 97365843  | - | 0          | 0          | -25.08888418 |
| chr13 | 97365861  | 97365861  | - | 0          | 0          | -27.81036531 |
| chr13 | 97365876  | 97365876  | - | 0          | 0          | -31.48992351 |
| chr13 | 97376304  | 97376304  | - | 9.87E-05   | 0.00124691 | -26.68566002 |
| chr13 | 97435072  | 97435072  | + | 0          | 0          | -27.15068457 |
| chr13 | 97435143  | 97435143  | - | 0          | 0          | -25.08723065 |
| chr13 | 97439171  | 97439171  | + | 3.19E-06   | 5.91E-05   | -32.76515152 |
| chr13 | 97439192  | 97439192  | + | 5.85E-09   | 1.74E-07   | -43.001443   |
| chr13 | 97523866  | 97523866  | + | 0          | 0          | -35.67888437 |
| chr13 | 97523998  | 97523998  | - | 0          | 0          | -54.86584046 |
| chr13 | 97524011  | 97524011  | - | 0          | 0          | -50.55432062 |
| chr13 | 97928388  | 97928388  | - | 0          | 0          | -25.64397679 |
| chr13 | 97939716  | 97939716  | - | 0          | 0          | -28.29063589 |
| chr13 | 98430484  | 98430484  | - | 7.15E-09   | 2.10E-07   | -32.09230769 |
| chr13 | 98588609  | 98588609  | + | 4.77E-05   | 0.00066184 | -37.14285714 |
| chr13 | 98692595  | 98692595  | - | 0.00023514 | 0.00263121 | -25.60386473 |
| chr13 | 98813174  | 98813174  | + | 4.41E-13   | 2.11E-11   | -26.80759804 |
| chr13 | 100553681 | 100553681 | + | 8.03E-08   | 2.01E-06   | -26.55367232 |
| chr13 | 100600929 | 100600929 | + | 0          | 0          | -29.13581915 |
| chr13 | 100601092 | 100601092 | + | 4.46E-14   | 2.35E-12   | -28.52459016 |
| chr13 | 100601093 | 100601093 | - | 8.29E-06   | 0.00013989 | -27.8229686  |
| chr13 | 101250724 | 101250724 | + | 6.34E-08   | 1.61E-06   | -37.89850358 |
| chr13 | 101691629 | 101691629 | + | 0          | 0          | -29.06862745 |
| chr13 | 101695170 | 101695170 | - | 0          | 0          | -34.74105644 |
| chr13 | 101757378 | 101757378 | + | 0          | 0          | -38.25963066 |
| chr13 | 101758234 | 101758234 | - | 5.65E-13   | 2.67E-11   | -27.41154227 |
| chr13 | 101758272 | 101758272 | - | 0          | 0          | -32.76798204 |
| chr13 | 102877502 | 102877502 | - | 0          | 0          | -32.21262603 |

|       |           |           |   |            |            |              |
|-------|-----------|-----------|---|------------|------------|--------------|
| chr13 | 104110284 | 104110284 | - | 0          | 0          | -25.69521691 |
| chr13 | 104190508 | 104190508 | + | 1.04E-07   | 2.55E-06   | 41.37931034  |
| chr13 | 104518437 | 104518437 | - | 2.26E-07   | 5.24E-06   | -25.35591999 |
| chr13 | 106037707 | 106037707 | + | 0.00076294 | 0.00706887 | -41.30434783 |
| chr13 | 107644997 | 107644997 | + | 0          | 0          | -41.53232526 |
| chr13 | 107645180 | 107645180 | + | 5.50E-10   | 1.88E-08   | -31.74036787 |
| chr13 | 108170731 | 108170731 | + | 0          | 0          | -25.67883062 |
| chr13 | 108170787 | 108170787 | - | 0          | 0          | -25.29662446 |
| chr13 | 108357582 | 108357582 | - | 0          | 0          | -33.84970336 |
| chr13 | 108357629 | 108357629 | - | 0          | 0          | -40.05947861 |
| chr13 | 108357656 | 108357656 | - | 0.00027538 | 0.00301101 | -26.44787645 |
| chr13 | 109205009 | 109205009 | - | 0          | 0          | -26.88668412 |
| chr13 | 109759972 | 109759972 | + | 0.00033211 | 0.00352758 | -41.60839161 |
| chr13 | 109776019 | 109776019 | + | 4.14E-07   | 9.14E-06   | -49.97854998 |
| chr13 | 110967414 | 110967414 | + | 0          | 0          | -29.3029395  |
| chr13 | 110967431 | 110967431 | + | 0          | 0          | -38.18384606 |
| chr13 | 110967432 | 110967432 | - | 0          | 0          | -29.06962062 |
| chr13 | 111510906 | 111510906 | + | 2.19E-05   | 0.00033263 | -28.59543011 |
| chr13 | 111552959 | 111552959 | - | 5.35E-07   | 1.16E-05   | -46.48786718 |
| chr13 | 111895106 | 111895106 | + | 0          | 0          | -31.28322677 |
| chr13 | 112101277 | 112101277 | - | 7.08E-05   | 0.00093469 | -33.41982356 |
| chr13 | 112101282 | 112101282 | - | 0.0001051  | 0.00131632 | -34.3495935  |
| chr13 | 112119910 | 112119910 | + | 2.80E-11   | 1.11E-09   | -51.48148148 |
| chr13 | 112531869 | 112531869 | + | 0          | 0          | -28.11686713 |
| chr13 | 112531881 | 112531881 | + | 0          | 0          | -29.9749094  |
| chr13 | 112531954 | 112531954 | - | 0          | 0          | -26.59273755 |
| chr13 | 112752391 | 112752391 | - | 2.10E-05   | 0.00032102 | -25.60881825 |
| chr13 | 113045699 | 113045699 | - | 2.68E-05   | 0.00039839 | -26.4        |
| chr13 | 113222778 | 113222778 | + | 2.52E-09   | 7.88E-08   | 52.20143093  |
| chr13 | 113288584 | 113288584 | + | 0.00043789 | 0.00444926 | -27.70833333 |
| chr13 | 113574417 | 113574417 | - | 3.70E-08   | 9.75E-07   | -37.28198407 |
| chr13 | 113599899 | 113599899 | + | 0          | 0          | -32.10744518 |
| chr13 | 113613945 | 113613945 | + | 0          | 0          | -27.38127175 |
| chr13 | 113617322 | 113617322 | + | 0          | 0          | -28.01853172 |
| chr13 | 113617369 | 113617369 | - | 0          | 0          | -28.38337182 |
| chr13 | 113617396 | 113617396 | - | 0          | 0          | -26.9887068  |
| chr13 | 113663587 | 113663587 | - | 3.60E-10   | 1.25E-08   | -29.2246399  |
| chr13 | 113663607 | 113663607 | - | 2.84E-08   | 7.64E-07   | -25.37688442 |
| chr13 | 114198939 | 114198939 | + | 2.75E-08   | 7.40E-07   | -38.33333333 |
| chr13 | 114855903 | 114855903 | - | 0          | 0          | -32.48155266 |
| chr13 | 114855925 | 114855925 | - | 0          | 0          | -35.58120805 |

|       |           |           |   |            |            |              |
|-------|-----------|-----------|---|------------|------------|--------------|
| chr13 | 116311442 | 116311442 | + | 0.0009817  | 0.00869736 | -27.47826087 |
| chr13 | 117197232 | 117197232 | - | 1.30E-08   | 3.66E-07   | -38.25027685 |
| chr13 | 117197237 | 117197237 | - | 2.22E-07   | 5.14E-06   | -33.73529126 |
| chr13 | 117219931 | 117219931 | + | 0          | 0          | -33.25585808 |
| chr13 | 117220042 | 117220042 | + | 3.70E-09   | 1.13E-07   | -30.85194376 |
| chr13 | 117220043 | 117220043 | - | 1.60E-11   | 6.51E-10   | -26.75086761 |
| chr13 | 117220048 | 117220048 | + | 2.59E-13   | 1.26E-11   | -37.87878788 |
| chr13 | 117220050 | 117220050 | + | 5.76E-13   | 2.72E-11   | -39.89271714 |
| chr13 | 117958602 | 117958602 | + | 0          | 0          | -29.47256327 |
| chr13 | 117958633 | 117958633 | - | 0          | 0          | -30.50169779 |
| chr13 | 117958643 | 117958643 | + | 1.33E-15   | 8.06E-14   | -38.34609876 |
| chr13 | 117958644 | 117958644 | - | 1.11E-15   | 6.76E-14   | -27.94824108 |
| chr13 | 117958651 | 117958651 | + | 1.32E-12   | 6.02E-11   | -32.74527945 |
| chr13 | 117958663 | 117958663 | + | 6.66E-16   | 4.13E-14   | -37.46839675 |
| chr13 | 117958680 | 117958680 | + | 2.57E-11   | 1.02E-09   | -31.6434808  |
| chr13 | 117958872 | 117958872 | - | 5.79E-06   | 0.00010139 | -38.58661664 |
| chr13 | 117958912 | 117958912 | - | 8.10E-09   | 2.36E-07   | -51.5        |
| chr13 | 119603115 | 119603115 | - | 3.09E-12   | 1.36E-10   | -31.79607434 |
| chr13 | 119738156 | 119738156 | + | 9.99E-16   | 6.10E-14   | -26.75646273 |
| chr13 | 119741690 | 119741690 | + | 1.35E-05   | 0.00021687 | -25.92132505 |
| chr13 | 119741707 | 119741707 | + | 4.06E-06   | 7.35E-05   | -28.07760141 |
| chr14 | 4596408   | 4596408   | - | 0.00019405 | 0.00223317 | -31.0387985  |
| chr14 | 7786337   | 7786337   | + | 3.47E-11   | 1.36E-09   | -46.3116543  |
| chr14 | 8004656   | 8004656   | - | 0.00019009 | 0.00219414 | -39.47132616 |
| chr14 | 8206769   | 8206769   | - | 1.31E-05   | 0.00021093 | -27.24089636 |
| chr14 | 9488427   | 9488427   | - | 0          | 0          | -27.27915976 |
| chr14 | 10432212  | 10432212  | + | 0          | 0          | -29.74743089 |
| chr14 | 11703222  | 11703222  | + | 1.80E-06   | 3.52E-05   | -46.34946678 |
| chr14 | 13933330  | 13933330  | - | 0          | 0          | -31.94632488 |
| chr14 | 13933382  | 13933382  | + | 3.02E-11   | 1.19E-09   | -25.08626639 |
| chr14 | 13933402  | 13933402  | + | 6.41E-13   | 3.01E-11   | -28.8615215  |
| chr14 | 13933578  | 13933578  | - | 2.43E-09   | 7.60E-08   | -28.40054023 |
| chr14 | 14346820  | 14346820  | + | 2.45E-06   | 4.65E-05   | -25.81564465 |
| chr14 | 14347024  | 14347024  | - | 1.39E-07   | 3.35E-06   | -29.0552659  |
| chr14 | 14347035  | 14347035  | - | 1.86E-07   | 4.37E-06   | -26.25929682 |
| chr14 | 14686438  | 14686438  | + | 0          | 0          | -26.43464026 |
| chr14 | 14686458  | 14686458  | + | 0          | 0          | -25.78787591 |
| chr14 | 18327261  | 18327261  | + | 1.79E-05   | 0.00027832 | -25.44891641 |
| chr14 | 19180665  | 19180665  | - | 6.20E-08   | 1.58E-06   | -25.41615667 |
| chr14 | 19180931  | 19180931  | - | 3.73E-08   | 9.84E-07   | -36.01004851 |
| chr14 | 19709266  | 19709266  | - | 1.55E-11   | 6.34E-10   | -25.096741   |

|       |          |          |   |          |            |              |
|-------|----------|----------|---|----------|------------|--------------|
| chr14 | 19750407 | 19750407 | + | 0        | 0          | -26.95272328 |
| chr14 | 19750579 | 19750579 | - | 0        | 0          | -30.35305349 |
| chr14 | 19750586 | 19750586 | + | 9.99E-16 | 6.10E-14   | -37.77639164 |
| chr14 | 19977545 | 19977545 | + | 3.56E-09 | 1.09E-07   | -43.50369458 |
| chr14 | 19977546 | 19977546 | - | 9.77E-09 | 2.81E-07   | -44.42121766 |
| chr14 | 19977583 | 19977583 | + | 0        | 0          | -27.31999039 |
| chr14 | 19977597 | 19977597 | + | 0        | 0          | -29.06525271 |
| chr14 | 20154906 | 20154906 | + | 1.48E-07 | 3.54E-06   | -30.69725596 |
| chr14 | 20560833 | 20560833 | + | 6.00E-15 | 3.43E-13   | -28.64562164 |
| chr14 | 20661776 | 20661776 | - | 0        | 0          | -29.96953941 |
| chr14 | 20661835 | 20661835 | - | 0        | 0          | -33.47737009 |
| chr14 | 20737374 | 20737374 | + | 0        | 0          | -35.89086315 |
| chr14 | 20737375 | 20737375 | - | 0        | 0          | -30.91165239 |
| chr14 | 20737380 | 20737380 | + | 0        | 0          | -27.04373601 |
| chr14 | 20737381 | 20737381 | - | 0        | 0          | -27.57641826 |
| chr14 | 20737390 | 20737390 | + | 0        | 0          | -30.14809953 |
| chr14 | 20737391 | 20737391 | - | 0        | 0          | -29.03469092 |
| chr14 | 20737411 | 20737411 | - | 0        | 0          | -32.41539482 |
| chr14 | 20946398 | 20946398 | - | 2.26E-06 | 4.33E-05   | -42.59549974 |
| chr14 | 21686138 | 21686138 | + | 7.64E-09 | 2.23E-07   | -39.06626506 |
| chr14 | 21686139 | 21686139 | - | 0        | 0          | -32.45497352 |
| chr14 | 21686380 | 21686380 | - | 0        | 0          | -34.62927831 |
| chr14 | 21719843 | 21719843 | - | 6.72E-06 | 0.00011581 | -31.54109589 |
| chr14 | 21891593 | 21891593 | + | 0        | 0          | -31.06808826 |
| chr14 | 21891637 | 21891637 | + | 0        | 0          | -38.13748975 |
| chr14 | 21891638 | 21891638 | - | 0        | 0          | -40.72480783 |
| chr14 | 21891657 | 21891657 | - | 0        | 0          | -28.31732375 |
| chr14 | 21982512 | 21982512 | - | 0        | 0          | -35.61445714 |
| chr14 | 21984586 | 21984586 | + | 1.10E-06 | 2.24E-05   | -30.38403614 |
| chr14 | 21990428 | 21990428 | + | 0        | 0          | -46.46241013 |
| chr14 | 21990460 | 21990460 | + | 0        | 0          | -49.00083693 |
| chr14 | 21990461 | 21990461 | - | 0        | 0          | -43.6049492  |
| chr14 | 21990479 | 21990479 | - | 0        | 0          | -46.31625619 |
| chr14 | 21990643 | 21990643 | - | 0        | 0          | -43.73117668 |
| chr14 | 21990645 | 21990645 | - | 0        | 0          | -42.09029066 |
| chr14 | 21990665 | 21990665 | - | 0        | 0          | -53.68513826 |
| chr14 | 21990669 | 21990669 | + | 0        | 0          | -53.5066797  |
| chr14 | 21990670 | 21990670 | - | 0        | 0          | -55.35533362 |
| chr14 | 21990783 | 21990783 | - | 0        | 0          | -57.7130609  |
| chr14 | 21990797 | 21990797 | - | 0        | 0          | -59.92151755 |
| chr14 | 21990804 | 21990804 | - | 0        | 0          | -60.17018868 |

|       |          |          |   |          |          |              |
|-------|----------|----------|---|----------|----------|--------------|
| chr14 | 21990817 | 21990817 | - | 0        | 0        | -64.03162055 |
| chr14 | 21990824 | 21990824 | - | 0        | 0        | -48.8390851  |
| chr14 | 21990836 | 21990836 | + | 0        | 0        | -48.99269043 |
| chr14 | 21990843 | 21990843 | + | 0        | 0        | -66.89681615 |
| chr14 | 21990852 | 21990852 | + | 0        | 0        | -64.5440613  |
| chr14 | 21990859 | 21990859 | + | 0        | 0        | -60.3264731  |
| chr14 | 21990861 | 21990861 | + | 0        | 0        | -47.33886473 |
| chr14 | 21990877 | 21990877 | + | 0        | 0        | -60.41489362 |
| chr14 | 21990878 | 21990878 | - | 0        | 0        | -46.83050579 |
| chr14 | 21990884 | 21990884 | + | 0        | 0        | -64.68328996 |
| chr14 | 21990885 | 21990885 | - | 0        | 0        | -60.17322067 |
| chr14 | 21990890 | 21990890 | - | 0        | 0        | -56.86109965 |
| chr14 | 21990894 | 21990894 | - | 0        | 0        | -45.70516178 |
| chr14 | 21990900 | 21990900 | - | 0        | 0        | -56.19271031 |
| chr14 | 21990914 | 21990914 | - | 0        | 0        | -57.99439718 |
| chr14 | 21991289 | 21991289 | + | 2.85E-13 | 1.39E-11 | -48.59559046 |
| chr14 | 21991300 | 21991300 | + | 2.12E-14 | 1.15E-12 | -49.02576996 |
| chr14 | 21991305 | 21991305 | + | 1.04E-14 | 5.82E-13 | -46.86363636 |
| chr14 | 21991318 | 21991318 | + | 1.35E-12 | 6.17E-11 | -45.23593466 |
| chr14 | 21991457 | 21991457 | - | 0        | 0        | -37.35701041 |
| chr14 | 21991468 | 21991468 | - | 0        | 0        | -40.08153352 |
| chr14 | 21991485 | 21991485 | + | 2.22E-16 | 1.43E-14 | -58.21368243 |
| chr14 | 21991486 | 21991486 | - | 0        | 0        | -66.40011631 |
| chr14 | 21991723 | 21991723 | - | 5.90E-12 | 2.51E-10 | -47.68275203 |
| chr14 | 21991740 | 21991740 | - | 1.39E-11 | 5.70E-10 | -47.41997133 |
| chr14 | 21991754 | 21991754 | - | 0        | 0        | -66.05868358 |
| chr14 | 22256578 | 22256578 | - | 0        | 0        | -35.85269221 |
| chr14 | 24644568 | 24644568 | - | 2.03E-11 | 8.16E-10 | -27.50512996 |
| chr14 | 25052236 | 25052236 | + | 0        | 0        | -28.20385253 |
| chr14 | 25052283 | 25052283 | + | 0        | 0        | -27.20522052 |
| chr14 | 25052284 | 25052284 | - | 0        | 0        | -28.86490905 |
| chr14 | 25052308 | 25052308 | - | 0        | 0        | -25.32360731 |
| chr14 | 25052418 | 25052418 | + | 4.27E-08 | 1.11E-06 | -26.80673833 |
| chr14 | 25108463 | 25108463 | + | 0        | 0        | -37.11824324 |
| chr14 | 25108480 | 25108480 | + | 0        | 0        | -50.83874017 |
| chr14 | 25108481 | 25108481 | - | 0        | 0        | -49.83557502 |
| chr14 | 25108505 | 25108505 | + | 0        | 0        | -41.76067616 |
| chr14 | 25108506 | 25108506 | - | 0        | 0        | -41.87589511 |
| chr14 | 25108518 | 25108518 | - | 0        | 0        | -43.52980715 |
| chr14 | 25108799 | 25108799 | - | 1.61E-11 | 6.55E-10 | -62.37762238 |
| chr14 | 25108810 | 25108810 | + | 1.46E-06 | 2.91E-05 | -54.14244186 |

|       |          |          |   |          |            |              |
|-------|----------|----------|---|----------|------------|--------------|
| chr14 | 25108811 | 25108811 | - | 4.98E-07 | 1.08E-05   | -47.62237762 |
| chr14 | 25109074 | 25109074 | + | 0        | 0          | -33.88281426 |
| chr14 | 25318299 | 25318299 | - | 0        | 0          | -29.54351156 |
| chr14 | 25318354 | 25318354 | - | 0        | 0          | -26.26713069 |
| chr14 | 25377825 | 25377825 | + | 2.22E-16 | 1.43E-14   | -28.24768163 |
| chr14 | 25419237 | 25419237 | - | 0        | 0          | -29.61595705 |
| chr14 | 25481457 | 25481457 | - | 0        | 0          | -25.16732795 |
| chr14 | 25534968 | 25534968 | + | 0        | 0          | -30.35320088 |
| chr14 | 25534969 | 25534969 | - | 0        | 0          | -32.43963761 |
| chr14 | 25604384 | 25604384 | + | 0        | 0          | -26.36499002 |
| chr14 | 25604466 | 25604466 | - | 0        | 0          | -27.56053563 |
| chr14 | 25604468 | 25604468 | - | 0        | 0          | -26.95628387 |
| chr14 | 25604482 | 25604482 | - | 0        | 0          | -27.16236057 |
| chr14 | 25604507 | 25604507 | - | 0        | 0          | -27.4409184  |
| chr14 | 25616016 | 25616016 | + | 7.49E-10 | 2.51E-08   | -29.36665017 |
| chr14 | 25616213 | 25616213 | - | 0        | 0          | -41.140764   |
| chr14 | 25616233 | 25616233 | + | 0        | 0          | -43.4243623  |
| chr14 | 25616234 | 25616234 | - | 0        | 0          | -44.75456747 |
| chr14 | 25616349 | 25616349 | - | 0        | 0          | -28.42903277 |
| chr14 | 25734746 | 25734746 | + | 0        | 0          | -39.28774975 |
| chr14 | 25734767 | 25734767 | + | 6.07E-11 | 2.32E-09   | -29.20831272 |
| chr14 | 25760585 | 25760585 | - | 1.51E-08 | 4.22E-07   | -27.34782609 |
| chr14 | 25847785 | 25847785 | + | 0        | 0          | -27.24175565 |
| chr14 | 27066021 | 27066021 | + | 0        | 0          | -28.45797388 |
| chr14 | 27066048 | 27066048 | + | 0        | 0          | -28.01163213 |
| chr14 | 27066106 | 27066106 | + | 5.06E-05 | 0.00069699 | -33.9025933  |
| chr14 | 27068535 | 27068535 | + | 3.33E-11 | 1.31E-09   | -31.85727258 |
| chr14 | 27115437 | 27115437 | + | 0        | 0          | -39.63473817 |
| chr14 | 27192939 | 27192939 | - | 6.90E-06 | 0.00011856 | -40.51282051 |
| chr14 | 27296878 | 27296878 | + | 2.17E-09 | 6.84E-08   | -27.28436929 |
| chr14 | 30124877 | 30124877 | - | 0        | 0          | -37.24896019 |
| chr14 | 30124891 | 30124891 | - | 6.98E-13 | 3.27E-11   | -26.14154231 |
| chr14 | 30352372 | 30352372 | - | 0        | 0          | -26.01728831 |
| chr14 | 30576265 | 30576265 | + | 0        | 0          | -25.13642351 |
| chr14 | 30576266 | 30576266 | - | 0        | 0          | -27.90172416 |
| chr14 | 31153256 | 31153256 | + | 0        | 0          | -29.94570405 |
| chr14 | 31269417 | 31269417 | + | 1.56E-06 | 3.10E-05   | -29.24462924 |
| chr14 | 31325044 | 31325044 | - | 0        | 0          | -25.3236513  |
| chr14 | 31388676 | 31388676 | + | 0        | 0          | -25.27881041 |
| chr14 | 31388861 | 31388861 | - | 6.38E-11 | 2.43E-09   | -25.64413868 |
| chr14 | 31410515 | 31410515 | + | 0        | 0          | -41.27848101 |



|       |          |          |   |            |            |              |
|-------|----------|----------|---|------------|------------|--------------|
| chr14 | 31410644 | 31410644 | - | 0          | 0          | -33.06451613 |
| chr14 | 31557078 | 31557078 | - | 3.48E-05   | 0.00050099 | -30.33613445 |
| chr14 | 31669338 | 31669338 | + | 0          | 0          | -28.73507781 |
| chr14 | 32117586 | 32117586 | - | 0          | 0          | -31.62123521 |
| chr14 | 32117608 | 32117608 | - | 0          | 0          | -34.80063582 |
| chr14 | 32700997 | 32700997 | + | 0.00014648 | 0.00175394 | -30          |
| chr14 | 32719192 | 32719192 | - | 0          | 0          | -25.6687539  |
| chr14 | 33000597 | 33000597 | - | 2.89E-14   | 1.55E-12   | -31.94467799 |
| chr14 | 33350903 | 33350903 | + | 1.05E-08   | 2.99E-07   | -28.97154128 |
| chr14 | 33354147 | 33354147 | - | 7.09E-13   | 3.32E-11   | -28.93526126 |
| chr14 | 34195161 | 34195161 | + | 0.00020648 | 0.00235475 | 35.39576366  |
| chr14 | 34201820 | 34201820 | + | 0          | 0          | -28.45175607 |
| chr14 | 34201851 | 34201851 | + | 0          | 0          | -29.38223386 |
| chr14 | 34201877 | 34201877 | - | 0          | 0          | -25.02859481 |
| chr14 | 34360419 | 34360419 | + | 9.79E-07   | 2.02E-05   | -37.6545218  |
| chr14 | 34375689 | 34375689 | + | 3.01E-10   | 1.06E-08   | -33.11633903 |
| chr14 | 34591022 | 34591022 | - | 1.23E-09   | 4.01E-08   | -26.95707071 |
| chr14 | 34614750 | 34614750 | + | 0          | 0          | -32.03215455 |
| chr14 | 34614766 | 34614766 | + | 0          | 0          | -35.0063517  |
| chr14 | 34614767 | 34614767 | - | 0          | 0          | -34.72581933 |
| chr14 | 34614771 | 34614771 | + | 0          | 0          | -39.98710368 |
| chr14 | 34614772 | 34614772 | - | 0          | 0          | -35.15303893 |
| chr14 | 34614789 | 34614789 | + | 0          | 0          | -35.6049287  |
| chr14 | 34614790 | 34614790 | - | 0          | 0          | -35.85125556 |
| chr14 | 34614829 | 34614829 | + | 0          | 0          | -28.23367903 |
| chr14 | 34769888 | 34769888 | + | 0          | 0          | -26.14819795 |
| chr14 | 40957334 | 40957334 | - | 0          | 0          | -37.17231012 |
| chr14 | 40989725 | 40989725 | + | 0          | 0          | -32.64232348 |
| chr14 | 41004565 | 41004565 | - | 1.81E-06   | 3.55E-05   | -27.6158402  |
| chr14 | 41004598 | 41004598 | - | 5.70E-07   | 1.23E-05   | -32.03363914 |
| chr14 | 42542934 | 42542934 | + | 0.00041942 | 0.00429171 | -32.54237288 |
| chr14 | 44847126 | 44847126 | - | 0.00069728 | 0.00655967 | -29.62962963 |
| chr14 | 45445423 | 45445423 | + | 1.05E-06   | 2.15E-05   | -29.63780107 |
| chr14 | 46017924 | 46017924 | + | 1.85E-06   | 3.61E-05   | -28.52515244 |
| chr14 | 46385689 | 46385689 | + | 0          | 0          | -39.34078156 |
| chr14 | 46391826 | 46391826 | - | 2.28E-08   | 6.22E-07   | -31.81818182 |
| chr14 | 46569706 | 46569706 | - | 2.31E-12   | 1.03E-10   | -39.60629921 |
| chr14 | 46882030 | 46882030 | + | 1.02E-14   | 5.70E-13   | -31.87929956 |
| chr14 | 47111144 | 47111144 | - | 2.54E-08   | 6.87E-07   | -28.68421053 |
| chr14 | 47395845 | 47395845 | + | 0          | 0          | -27.45278004 |
| chr14 | 47395919 | 47395919 | - | 0          | 0          | -34.04547362 |

|       |          |          |   |          |            |              |
|-------|----------|----------|---|----------|------------|--------------|
| chr14 | 47395923 | 47395923 | - | 0        | 0          | -32.25966417 |
| chr14 | 47395927 | 47395927 | - | 0        | 0          | -33.09063374 |
| chr14 | 47747730 | 47747730 | + | 5.19E-05 | 0.00071202 | -36.09090909 |
| chr14 | 48010411 | 48010411 | - | 3.33E-16 | 2.11E-14   | -29.53141148 |
| chr14 | 50897015 | 50897015 | + | 0        | 0          | -27.98493676 |
| chr14 | 50897138 | 50897138 | + | 0        | 0          | -30.86317031 |
| chr14 | 50897295 | 50897295 | - | 3.11E-15 | 1.82E-13   | -25.09986183 |
| chr14 | 50897298 | 50897298 | + | 0        | 0          | -25.98235354 |
| chr14 | 50897415 | 50897415 | - | 0        | 0          | -29.45570928 |
| chr14 | 51008082 | 51008082 | - | 3.34E-13 | 1.61E-11   | -29.41932624 |
| chr14 | 51894306 | 51894306 | + | 0        | 0          | -27.45267424 |
| chr14 | 51932339 | 51932339 | + | 0        | 0          | -34.0986105  |
| chr14 | 51932393 | 51932393 | - | 0        | 0          | -33.10639101 |
| chr14 | 51942169 | 51942169 | - | 1.13E-08 | 3.23E-07   | -33.85917661 |
| chr14 | 51942303 | 51942303 | - | 7.11E-09 | 2.08E-07   | -26.60214212 |
| chr14 | 51989606 | 51989606 | - | 1.08E-14 | 6.00E-13   | -27.47624438 |
| chr14 | 52008410 | 52008410 | + | 0        | 0          | -26.35785267 |
| chr14 | 52009339 | 52009339 | + | 0        | 0          | -26.64598245 |
| chr14 | 52009368 | 52009368 | - | 0        | 0          | -26.53825446 |
| chr14 | 52009377 | 52009377 | + | 0        | 0          | -34.39103701 |
| chr14 | 52009378 | 52009378 | - | 0        | 0          | -35.52473997 |
| chr14 | 52118534 | 52118534 | - | 1.62E-06 | 3.20E-05   | -26.22556172 |
| chr14 | 52119803 | 52119803 | + | 2.09E-08 | 5.73E-07   | -25.2187858  |
| chr14 | 52244802 | 52244802 | - | 0        | 0          | -31.54054209 |
| chr14 | 52314614 | 52314614 | - | 0        | 0          | -31.10055978 |
| chr14 | 52314632 | 52314632 | + | 0        | 0          | -28.58361038 |
| chr14 | 52314765 | 52314765 | - | 0        | 0          | -32.90334139 |
| chr14 | 52315413 | 52315413 | + | 0        | 0          | -30.19018704 |
| chr14 | 52315554 | 52315554 | + | 0        | 0          | -26.7388139  |
| chr14 | 52315586 | 52315586 | + | 0        | 0          | -37.50889385 |
| chr14 | 54228827 | 54228827 | + | 2.71E-07 | 6.19E-06   | -29.67610155 |
| chr14 | 54229006 | 54229006 | - | 0        | 0          | -37.21509787 |
| chr14 | 54229012 | 54229012 | + | 4.44E-16 | 2.79E-14   | -46.30955904 |
| chr14 | 54229013 | 54229013 | - | 0        | 0          | -30.77298198 |
| chr14 | 54229157 | 54229157 | - | 0        | 0          | -46.11341737 |
| chr14 | 54229174 | 54229174 | - | 0        | 0          | -53.98556174 |
| chr14 | 54229193 | 54229193 | - | 8.40E-14 | 4.31E-12   | -38.85699177 |
| chr14 | 54229204 | 54229204 | - | 0        | 0          | -52.94612795 |
| chr14 | 54233984 | 54233984 | - | 1.30E-05 | 0.00020882 | -36.71215075 |
| chr14 | 54410404 | 54410404 | - | 8.92E-06 | 0.00014935 | -38.65740741 |
| chr14 | 54417458 | 54417458 | + | 0        | 0          | -33.58529679 |

|       |          |          |   |            |            |              |
|-------|----------|----------|---|------------|------------|--------------|
| chr14 | 54417469 | 54417469 | + | 0          | 0          | -26.72127584 |
| chr14 | 54417481 | 54417481 | + | 0          | 0          | -30.10442443 |
| chr14 | 54417552 | 54417552 | - | 0          | 0          | -45.61856763 |
| chr14 | 54417588 | 54417588 | - | 0          | 0          | -46.355702   |
| chr14 | 54417600 | 54417600 | - | 0          | 0          | -32.63888889 |
| chr14 | 54417604 | 54417604 | + | 2.18E-12   | 9.73E-11   | -42.7067283  |
| chr14 | 54417610 | 54417610 | + | 3.26E-12   | 1.43E-10   | -37.64044944 |
| chr14 | 54417612 | 54417612 | + | 8.77E-14   | 4.50E-12   | -47.15909091 |
| chr14 | 54417620 | 54417620 | + | 1.63E-14   | 8.95E-13   | -42.13483146 |
| chr14 | 54417621 | 54417621 | - | 0.00010562 | 0.00132176 | -36.38888889 |
| chr14 | 54417623 | 54417623 | + | 2.33E-15   | 1.38E-13   | -45.56945863 |
| chr14 | 54417624 | 54417624 | - | 8.27E-05   | 0.00106921 | -36.94444444 |
| chr14 | 54417631 | 54417631 | + | 6.99E-15   | 3.97E-13   | -35.59520017 |
| chr14 | 54417632 | 54417632 | - | 0.00069325 | 0.00652817 | -31.66666667 |
| chr14 | 54417650 | 54417650 | + | 0          | 0          | -48.5121925  |
| chr14 | 54417666 | 54417666 | + | 0          | 0          | -36.780426   |
| chr14 | 54417782 | 54417782 | - | 0          | 0          | -26.27779945 |
| chr14 | 54417801 | 54417801 | - | 0          | 0          | -25.92450721 |
| chr14 | 54417816 | 54417816 | + | 0          | 0          | -43.00883189 |
| chr14 | 54417835 | 54417835 | + | 0          | 0          | -47.42649862 |
| chr14 | 54417836 | 54417836 | - | 0          | 0          | -39.12218487 |
| chr14 | 54417866 | 54417866 | - | 0          | 0          | -27.80203892 |
| chr14 | 54432773 | 54432773 | + | 1.30E-08   | 3.66E-07   | -31.86068256 |
| chr14 | 54475494 | 54475494 | + | 0          | 0          | -31.57275226 |
| chr14 | 54475555 | 54475555 | - | 0          | 0          | -37.21624095 |
| chr14 | 54492894 | 54492894 | + | 0.00108267 | 0.00942177 | -33.14855876 |
| chr14 | 54572862 | 54572862 | + | 0          | 0          | -34.37968738 |
| chr14 | 54575545 | 54575545 | + | 0          | 0          | -36.5000068  |
| chr14 | 54575607 | 54575607 | - | 0          | 0          | -31.12426019 |
| chr14 | 54575612 | 54575612 | + | 1.85E-05   | 0.00028648 | -35.71428571 |
| chr14 | 54912227 | 54912227 | - | 0          | 0          | -27.3786325  |
| chr14 | 54912234 | 54912234 | + | 0          | 0          | -29.62900002 |
| chr14 | 54927089 | 54927089 | - | 1.11E-16   | 7.26E-15   | -29.37602014 |
| chr14 | 55064812 | 55064812 | + | 1.61E-08   | 4.49E-07   | -37.60816892 |
| chr14 | 55064848 | 55064848 | + | 1.91E-07   | 4.49E-06   | -38.7345679  |
| chr14 | 55071805 | 55071805 | + | 2.04E-06   | 3.95E-05   | -30.76176251 |
| chr14 | 55071926 | 55071926 | - | 0          | 0          | -40.03936008 |
| chr14 | 55071935 | 55071935 | - | 0          | 0          | -31.58436214 |
| chr14 | 55071955 | 55071955 | - | 0          | 0          | -28.97514855 |
| chr14 | 55071971 | 55071971 | - | 0          | 0          | -27.83909061 |
| chr14 | 55071975 | 55071975 | + | 0          | 0          | -28.00931436 |

|       |          |          |   |          |            |              |
|-------|----------|----------|---|----------|------------|--------------|
| chr14 | 55072058 | 55072058 | - | 0        | 0          | -25.19230769 |
| chr14 | 55091368 | 55091368 | + | 1.74E-05 | 0.00027093 | -35.0485992  |
| chr14 | 55097992 | 55097992 | + | 0        | 0          | -27.02113347 |
| chr14 | 55108198 | 55108198 | + | 0        | 0          | -30.51828696 |
| chr14 | 55108430 | 55108430 | - | 1.20E-08 | 3.40E-07   | -38.3286648  |
| chr14 | 55109247 | 55109247 | - | 2.03E-06 | 3.93E-05   | -32.85356696 |
| chr14 | 55109674 | 55109674 | + | 0        | 0          | -25.35224676 |
| chr14 | 55109675 | 55109675 | - | 0        | 0          | -26.57954335 |
| chr14 | 55109696 | 55109696 | + | 0        | 0          | -27.2679938  |
| chr14 | 55109697 | 55109697 | - | 0        | 0          | -25.6090086  |
| chr14 | 55113819 | 55113819 | + | 0        | 0          | -25.63883333 |
| chr14 | 55113825 | 55113825 | - | 0        | 0          | -25.48423065 |
| chr14 | 55113861 | 55113861 | - | 0        | 0          | -25.39984737 |
| chr14 | 55113965 | 55113965 | - | 0        | 0          | -27.13330233 |
| chr14 | 55113979 | 55113979 | - | 0        | 0          | -31.47461922 |
| chr14 | 55113991 | 55113991 | - | 0        | 0          | -26.91874004 |
| chr14 | 55116740 | 55116740 | + | 0        | 0          | -27.82291125 |
| chr14 | 55116814 | 55116814 | + | 0        | 0          | -33.65808777 |
| chr14 | 55116936 | 55116936 | - | 2.32E-05 | 0.00035062 | -29.27010924 |
| chr14 | 55146764 | 55146764 | + | 1.88E-07 | 4.41E-06   | -25.51311214 |
| chr14 | 55146944 | 55146944 | - | 0        | 0          | -27.84280179 |
| chr14 | 55728127 | 55728127 | + | 4.65E-10 | 1.60E-08   | -28.95981087 |
| chr14 | 55762012 | 55762012 | + | 0        | 0          | -35.11247878 |
| chr14 | 55762015 | 55762015 | + | 0        | 0          | -36.21269598 |
| chr14 | 55762044 | 55762044 | - | 0        | 0          | -32.22703744 |
| chr14 | 55762069 | 55762069 | - | 0        | 0          | -25.7387462  |
| chr14 | 55767713 | 55767713 | + | 4.03E-07 | 8.92E-06   | -28.49315068 |
| chr14 | 55783672 | 55783672 | - | 0        | 0          | -30.46710526 |
| chr14 | 55783727 | 55783727 | - | 0        | 0          | -26.87657511 |
| chr14 | 55787989 | 55787989 | - | 0        | 0          | -29.55933432 |
| chr14 | 55824571 | 55824571 | + | 9.64E-08 | 2.38E-06   | -27.88389513 |
| chr14 | 55826699 | 55826699 | - | 9.50E-11 | 3.55E-09   | -61.36363636 |
| chr14 | 55826708 | 55826708 | - | 2.15E-07 | 5.01E-06   | -57.57575758 |
| chr14 | 55826713 | 55826713 | - | 7.55E-07 | 1.59E-05   | -43.44155844 |
| chr14 | 55826759 | 55826759 | + | 0        | 0          | -35.35659943 |
| chr14 | 55826770 | 55826770 | + | 0        | 0          | -37.60882469 |
| chr14 | 55826778 | 55826778 | + | 0        | 0          | -36.68649031 |
| chr14 | 55826782 | 55826782 | + | 0        | 0          | -41.72605467 |
| chr14 | 55826839 | 55826839 | - | 0        | 0          | -34.86013002 |
| chr14 | 55826856 | 55826856 | - | 0        | 0          | -32.51847771 |
| chr14 | 55826863 | 55826863 | - | 0        | 0          | -27.03467035 |

|       |          |          |   |          |            |              |
|-------|----------|----------|---|----------|------------|--------------|
| chr14 | 55826866 | 55826866 | - | 0        | 0          | -37.20199191 |
| chr14 | 55826913 | 55826913 | + | 0        | 0          | -37.71305068 |
| chr14 | 55826963 | 55826963 | - | 0        | 0          | -28.65820344 |
| chr14 | 55826976 | 55826976 | + | 0        | 0          | -26.57660947 |
| chr14 | 55826977 | 55826977 | - | 0        | 0          | -26.31070062 |
| chr14 | 55827085 | 55827085 | - | 0        | 0          | -32.23357315 |
| chr14 | 55827104 | 55827104 | - | 0        | 0          | -35.77761494 |
| chr14 | 55827126 | 55827126 | - | 0        | 0          | -32.86044624 |
| chr14 | 56663556 | 56663556 | - | 1.02E-05 | 0.00016804 | -27.37179487 |
| chr14 | 57163732 | 57163732 | - | 2.19E-05 | 0.00033323 | -31.72043011 |
| chr14 | 57363384 | 57363384 | - | 0        | 0          | -25.74069998 |
| chr14 | 57363406 | 57363406 | - | 0        | 0          | -26.42161419 |
| chr14 | 57530546 | 57530546 | - | 9.57E-06 | 0.00015912 | -37.24902607 |
| chr14 | 57542551 | 57542551 | - | 4.48E-08 | 1.17E-06   | -33.90425216 |
| chr14 | 57542571 | 57542571 | + | 0        | 0          | -25.37700676 |
| chr14 | 57588777 | 57588777 | + | 4.37E-08 | 1.14E-06   | -30.99991505 |
| chr14 | 57734150 | 57734150 | - | 1.04E-10 | 3.85E-09   | -30.68231475 |
| chr14 | 57734165 | 57734165 | - | 5.74E-12 | 2.45E-10   | -31.56666667 |
| chr14 | 57747262 | 57747262 | + | 0        | 0          | -25.63646713 |
| chr14 | 59647171 | 59647171 | - | 0        | 0          | -35.74515944 |
| chr14 | 59715851 | 59715851 | - | 4.83E-06 | 8.60E-05   | -30.62015504 |
| chr14 | 60762957 | 60762957 | + | 0        | 0          | -30.58796409 |
| chr14 | 61275546 | 61275546 | - | 0        | 0          | -25.00148743 |
| chr14 | 61328140 | 61328140 | - | 0        | 0          | -27.06083535 |
| chr14 | 61328146 | 61328146 | - | 0        | 0          | -26.75713376 |
| chr14 | 61684518 | 61684518 | - | 5.95E-08 | 1.52E-06   | -43.66197183 |
| chr14 | 61684739 | 61684739 | - | 0        | 0          | -48.39181287 |
| chr14 | 61684748 | 61684748 | - | 1.78E-15 | 1.06E-13   | -35.36821705 |
| chr14 | 61684760 | 61684760 | + | 0        | 0          | -36.35060551 |
| chr14 | 61684761 | 61684761 | - | 3.92E-09 | 1.19E-07   | -33.05764821 |
| chr14 | 61684783 | 61684783 | + | 0        | 0          | -53.84574658 |
| chr14 | 61684791 | 61684791 | + | 0        | 0          | -57.85731247 |
| chr14 | 61686118 | 61686118 | + | 0        | 0          | -58.17707224 |
| chr14 | 61686124 | 61686124 | + | 0        | 0          | -63.44260595 |
| chr14 | 61686166 | 61686166 | + | 0        | 0          | -60.0020332  |
| chr14 | 61686168 | 61686168 | + | 0        | 0          | -66.05778218 |
| chr14 | 61686209 | 61686209 | - | 0        | 0          | -67.38172615 |
| chr14 | 61686212 | 61686212 | - | 0        | 0          | -37.61480066 |
| chr14 | 61686249 | 61686249 | + | 0        | 0          | -46.98380567 |
| chr14 | 61686250 | 61686250 | - | 0        | 0          | -36.75219961 |
| chr14 | 61686265 | 61686265 | + | 0        | 0          | -50.68445068 |

|       |          |          |   |            |            |              |
|-------|----------|----------|---|------------|------------|--------------|
| chr14 | 61686275 | 61686275 | + | 0          | 0          | -57.33411627 |
| chr14 | 61689872 | 61689872 | + | 0          | 0          | -26.40695277 |
| chr14 | 61689933 | 61689933 | - | 0          | 0          | -28.04453435 |
| chr14 | 61689951 | 61689951 | - | 0          | 0          | -35.96853532 |
| chr14 | 61707232 | 61707232 | - | 0          | 0          | -25.93924814 |
| chr14 | 62374177 | 62374177 | - | 7.05E-11   | 2.67E-09   | -32.91784237 |
| chr14 | 63076709 | 63076709 | - | 0.00069886 | 0.00657179 | -30.13824885 |
| chr14 | 63244150 | 63244150 | + | 0.00081622 | 0.00747304 | -32.77347115 |
| chr14 | 63343816 | 63343816 | + | 0.000561   | 0.00547733 | -25.29651594 |
| chr14 | 63899744 | 63899744 | + | 0          | 0          | -31.44963145 |
| chr14 | 63899795 | 63899795 | - | 0          | 0          | -25.44404279 |
| chr14 | 63940662 | 63940662 | + | 6.66E-06   | 0.00011488 | -29.12814678 |
| chr14 | 63944297 | 63944297 | - | 0          | 0          | -31.3418948  |
| chr14 | 63947859 | 63947859 | + | 3.82E-08   | 1.01E-06   | -32.93103448 |
| chr14 | 63947865 | 63947865 | + | 2.28E-12   | 1.02E-10   | -45.34782609 |
| chr14 | 63947886 | 63947886 | + | 1.16E-13   | 5.88E-12   | -49.38335939 |
| chr14 | 63947898 | 63947898 | + | 7.28E-07   | 1.54E-05   | -33.47826087 |
| chr14 | 63947900 | 63947900 | + | 1.76E-09   | 5.62E-08   | -33.85714286 |
| chr14 | 64059016 | 64059016 | + | 0          | 0          | -29.3879006  |
| chr14 | 64059017 | 64059017 | - | 0          | 0          | -35.19595177 |
| chr14 | 64063746 | 64063746 | + | 2.22E-16   | 1.43E-14   | -25.63944444 |
| chr14 | 64063747 | 64063747 | - | 0          | 0          | -33.37885566 |
| chr14 | 64064065 | 64064065 | - | 6.75E-14   | 3.50E-12   | -38.88276947 |
| chr14 | 64067095 | 64067095 | + | 0          | 0          | -28.41864018 |
| chr14 | 64164569 | 64164569 | + | 0          | 0          | -29.89945051 |
| chr14 | 64164590 | 64164590 | + | 0          | 0          | -32.3148688  |
| chr14 | 64164602 | 64164602 | + | 0          | 0          | -49.23069514 |
| chr14 | 64164603 | 64164603 | - | 0          | 0          | -46.95869837 |
| chr14 | 64256899 | 64256899 | + | 0          | 0          | -31.90030501 |
| chr14 | 64256916 | 64256916 | + | 0          | 0          | -29.28314649 |
| chr14 | 64256939 | 64256939 | + | 0          | 0          | -38.52455096 |
| chr14 | 64323923 | 64323923 | + | 0          | 0          | -35.73373145 |
| chr14 | 64324081 | 64324081 | + | 0.00027983 | 0.00305337 | -34.70967742 |
| chr14 | 64324082 | 64324082 | - | 0          | 0          | -33.96449704 |
| chr14 | 64324325 | 64324325 | - | 0.0008419  | 0.00766605 | -28.57142857 |
| chr14 | 65343114 | 65343114 | + | 0          | 0          | -47.70059053 |
| chr14 | 65381385 | 65381385 | + | 0.00023497 | 0.00262961 | -25.69124424 |
| chr14 | 65677864 | 65677864 | + | 6.10E-06   | 0.00010611 | -29.32982661 |
| chr14 | 65953306 | 65953306 | + | 0          | 0          | -38.25257732 |
| chr14 | 65953437 | 65953437 | + | 0          | 0          | -26.53524492 |
| chr14 | 66005154 | 66005154 | + | 4.26E-05   | 0.00059919 | -36.00305111 |

|       |          |          |   |           |            |              |
|-------|----------|----------|---|-----------|------------|--------------|
| chr14 | 67010110 | 67010110 | - | 7.41E-08  | 1.86E-06   | -28.38597508 |
| chr14 | 67097936 | 67097936 | + | 0         | 0          | -25.0708042  |
| chr14 | 67187199 | 67187199 | + | 4.98E-07  | 1.08E-05   | -30          |
| chr14 | 67309055 | 67309055 | - | 1.16E-12  | 5.32E-11   | -25.33162174 |
| chr14 | 67486966 | 67486966 | - | 1.54E-08  | 4.31E-07   | -40.66326531 |
| chr14 | 67643993 | 67643993 | + | 0.0009092 | 0.00816799 | -36.35029354 |
| chr14 | 67932348 | 67932348 | + | 8.47E-05  | 0.00109178 | -27.1189337  |
| chr14 | 67932383 | 67932383 | + | 5.20E-05  | 0.00071339 | -29.11605938 |
| chr14 | 68040930 | 68040930 | - | 0         | 0          | -25.49468607 |
| chr14 | 68040943 | 68040943 | - | 0         | 0          | -32.67503182 |
| chr14 | 69053580 | 69053580 | + | 0         | 0          | -29.51341533 |
| chr14 | 69173901 | 69173901 | + | 0         | 0          | -25.5217553  |
| chr14 | 69816282 | 69816282 | + | 0         | 0          | -33.54452737 |
| chr14 | 69840850 | 69840850 | - | 9.99E-16  | 6.10E-14   | -27.75579313 |
| chr14 | 69848166 | 69848166 | + | 2.13E-08  | 5.82E-07   | -25.00377655 |
| chr14 | 69868652 | 69868652 | + | 3.77E-11  | 1.47E-09   | -25.46826151 |
| chr14 | 69913144 | 69913144 | + | 3.96E-14  | 2.10E-12   | -38.38162931 |
| chr14 | 69913175 | 69913175 | + | 4.96E-09  | 1.49E-07   | -30.0847203  |
| chr14 | 69913359 | 69913359 | - | 3.21E-14  | 1.71E-12   | -29.51909237 |
| chr14 | 69913563 | 69913563 | + | 3.01E-10  | 1.06E-08   | -38.51692968 |
| chr14 | 69976185 | 69976185 | + | 0.000986  | 0.00872793 | -36.22994652 |
| chr14 | 69977415 | 69977415 | + | 1.13E-09  | 3.69E-08   | -25.00302788 |
| chr14 | 69995035 | 69995035 | + | 0         | 0          | -33.22524999 |
| chr14 | 69995183 | 69995183 | - | 3.73E-07  | 8.32E-06   | -29.0719697  |
| chr14 | 69995208 | 69995208 | - | 5.55E-12  | 2.37E-10   | -41.79421769 |
| chr14 | 69995226 | 69995226 | + | 0         | 0          | -27.35102421 |
| chr14 | 69995265 | 69995265 | + | 0         | 0          | -25.31825617 |
| chr14 | 69995315 | 69995315 | + | 1.51E-12  | 6.86E-11   | -40.85914086 |
| chr14 | 69995316 | 69995316 | - | 0         | 0          | -44.04982119 |
| chr14 | 69995398 | 69995398 | - | 0         | 0          | -50.73421439 |
| chr14 | 69995753 | 69995753 | + | 1.06E-05  | 0.00017402 | -34.7086978  |
| chr14 | 70021257 | 70021257 | + | 0         | 0          | -27.8634769  |
| chr14 | 70074355 | 70074355 | - | 0         | 0          | -32.27735481 |
| chr14 | 70287756 | 70287756 | + | 1.25E-08  | 3.54E-07   | -31.67374681 |
| chr14 | 70287773 | 70287773 | + | 7.07E-08  | 1.78E-06   | -31.1205074  |
| chr14 | 70287784 | 70287784 | + | 4.51E-11  | 1.75E-09   | -37.73784355 |
| chr14 | 70622514 | 70622514 | + | 0         | 0          | -38.02946593 |
| chr14 | 70622518 | 70622518 | + | 0         | 0          | -41.47325498 |
| chr14 | 70622530 | 70622530 | + | 0         | 0          | -37.77335705 |
| chr14 | 70622583 | 70622583 | + | 1.11E-16  | 7.26E-15   | -25.98075439 |
| chr14 | 70628492 | 70628492 | - | 1.74E-08  | 4.81E-07   | -41.94931774 |

|       |          |          |   |            |            |              |
|-------|----------|----------|---|------------|------------|--------------|
| chr14 | 70629905 | 70629905 | + | 8.61E-08   | 2.14E-06   | -28.39105339 |
| chr14 | 70635087 | 70635087 | + | 7.28E-13   | 3.41E-11   | -29.5042735  |
| chr14 | 70635275 | 70635275 | - | 2.41E-07   | 5.57E-06   | -42.39040529 |
| chr14 | 70635317 | 70635317 | - | 5.13E-06   | 9.09E-05   | -38.254756   |
| chr14 | 70636917 | 70636917 | + | 0          | 0          | -25.12341922 |
| chr14 | 70636918 | 70636918 | - | 0          | 0          | -27.76339198 |
| chr14 | 70636942 | 70636942 | + | 0          | 0          | -34.86411614 |
| chr14 | 70636943 | 70636943 | - | 0          | 0          | -31.44829098 |
| chr14 | 70636948 | 70636948 | - | 0          | 0          | -29.94590681 |
| chr14 | 70641651 | 70641651 | + | 0          | 0          | -30.01730104 |
| chr14 | 70641744 | 70641744 | + | 5.61E-13   | 2.65E-11   | -36.85782557 |
| chr14 | 70644286 | 70644286 | + | 0.00016343 | 0.00192747 | -32.95625943 |
| chr14 | 70777593 | 70777593 | + | 0          | 0          | -26.19152495 |
| chr14 | 70777646 | 70777646 | - | 0          | 0          | -41.95173082 |
| chr14 | 70777667 | 70777667 | - | 0          | 0          | -35.60759069 |
| chr14 | 70832483 | 70832483 | + | 1.38E-07   | 3.33E-06   | -27.03390693 |
| chr14 | 71967367 | 71967367 | + | 0          | 0          | -26.8870229  |
| chr14 | 71967529 | 71967529 | + | 1.11E-15   | 6.76E-14   | -25.23793442 |
| chr14 | 72887912 | 72887912 | + | 0.00012254 | 0.00150277 | -29.33333333 |
| chr14 | 72887933 | 72887933 | + | 8.20E-05   | 0.00106163 | -28.68589744 |
| chr14 | 73178109 | 73178109 | + | 6.38E-07   | 1.36E-05   | -30.28904055 |
| chr14 | 73481723 | 73481723 | + | 1.43E-05   | 0.00022793 | -26.87802394 |
| chr14 | 75828498 | 75828498 | + | 0          | 0          | -26.02981064 |
| chr14 | 75828499 | 75828499 | - | 0          | 0          | -29.00685137 |
| chr14 | 76149686 | 76149686 | + | 0          | 0          | -25.34158757 |
| chr14 | 76149687 | 76149687 | - | 2.15E-11   | 8.62E-10   | -25.04485316 |
| chr14 | 76150720 | 76150720 | - | 3.00E-15   | 1.76E-13   | -32.38946846 |
| chr14 | 76153448 | 76153448 | + | 7.08E-11   | 2.68E-09   | -27.32905107 |
| chr14 | 76276863 | 76276863 | + | 3.28E-11   | 1.29E-09   | -25.58679064 |
| chr14 | 76416386 | 76416386 | - | 0          | 0          | -54.37401451 |
| chr14 | 76416428 | 76416428 | - | 1.32E-13   | 6.66E-12   | -37.09051724 |
| chr14 | 76416436 | 76416436 | - | 0          | 0          | -50.96982759 |
| chr14 | 76496427 | 76496427 | - | 1.12E-06   | 2.28E-05   | -30.90007628 |
| chr14 | 76506561 | 76506561 | - | 0          | 0          | -26.25815423 |
| chr14 | 76532952 | 76532952 | - | 0          | 0          | -39.84521835 |
| chr14 | 76532955 | 76532955 | - | 0          | 0          | -38.28288525 |
| chr14 | 76532958 | 76532958 | - | 0          | 0          | -39.22041106 |
| chr14 | 76532962 | 76532962 | - | 0          | 0          | -38.37027565 |
| chr14 | 76622699 | 76622699 | + | 0          | 0          | -35.3825488  |
| chr14 | 77385923 | 77385923 | + | 0          | 0          | -25.03380817 |
| chr14 | 77423369 | 77423369 | - | 2.22E-16   | 1.43E-14   | -25.97588509 |



|       |           |           |   |            |            |              |
|-------|-----------|-----------|---|------------|------------|--------------|
| chr14 | 77423451  | 77423451  | - | 0          | 0          | -29.45478781 |
| chr14 | 78289307  | 78289307  | - | 0          | 0          | -25.54161064 |
| chr14 | 78712909  | 78712909  | - | 0          | 0          | -39.58865248 |
| chr14 | 78726017  | 78726017  | - | 0.00027555 | 0.00301264 | -28.3355063  |
| chr14 | 78726031  | 78726031  | + | 0          | 0          | -36.7174878  |
| chr14 | 78726032  | 78726032  | - | 0.00047883 | 0.00479778 | -29.19559004 |
| chr14 | 78726131  | 78726131  | + | 1.82E-07   | 4.29E-06   | -31.81746283 |
| chr14 | 78726243  | 78726243  | - | 4.48E-13   | 2.14E-11   | -34.43240697 |
| chr14 | 78726286  | 78726286  | - | 3.05E-08   | 8.15E-07   | -28.79699248 |
| chr14 | 78733324  | 78733324  | + | 0          | 0          | -26.36559035 |
| chr14 | 79289887  | 79289887  | + | 0          | 0          | -28.88477801 |
| chr14 | 79486747  | 79486747  | + | 0          | 0          | -27.77138473 |
| chr14 | 82741656  | 82741656  | - | 9.30E-08   | 2.30E-06   | -31.4040493  |
| chr14 | 86468178  | 86468178  | - | 0.00041329 | 0.00423908 | -36.39937107 |
| chr14 | 93499052  | 93499052  | - | 2.57E-06   | 4.87E-05   | -33.52673021 |
| chr14 | 101477770 | 101477770 | + | 0          | 0          | -34.10613956 |
| chr14 | 103059450 | 103059450 | + | 1.78E-13   | 8.82E-12   | -33.18987123 |
| chr14 | 103679822 | 103679822 | + | 5.49E-11   | 2.11E-09   | -29.03307001 |
| chr14 | 103679964 | 103679964 | - | 2.55E-15   | 1.51E-13   | -39.17593529 |
| chr14 | 103680007 | 103680007 | - | 9.40E-08   | 2.32E-06   | -26.33583909 |
| chr14 | 103814533 | 103814533 | - | 0          | 0          | -25.22234371 |
| chr14 | 103834659 | 103834659 | - | 2.02E-12   | 9.02E-11   | -30.32520325 |
| chr14 | 105432772 | 105432772 | + | 5.81E-08   | 1.49E-06   | -25.19420618 |
| chr14 | 105502873 | 105502873 | + | 3.78E-09   | 1.15E-07   | -29.69388283 |
| chr14 | 105502890 | 105502890 | + | 2.94E-09   | 9.11E-08   | -29.91699005 |
| chr14 | 105619737 | 105619737 | - | 1.18E-13   | 5.95E-12   | -26.8166346  |
| chr14 | 105676796 | 105676796 | - | 0          | 0          | -27.56567511 |
| chr14 | 105862246 | 105862246 | + | 1.11E-16   | 7.26E-15   | -33.41801233 |
| chr14 | 105920438 | 105920438 | - | 0          | 0          | -34.96182906 |
| chr14 | 105920864 | 105920864 | + | 1.57E-10   | 5.71E-09   | -32.35675395 |
| chr14 | 105920878 | 105920878 | + | 3.86E-11   | 1.51E-09   | -30.70051366 |
| chr14 | 118221997 | 118221997 | - | 0          | 0          | -30.07741792 |
| chr14 | 118222012 | 118222012 | - | 0          | 0          | -28.19264274 |
| chr14 | 118606700 | 118606700 | + | 3.01E-06   | 5.62E-05   | -35.88591184 |
| chr14 | 118699789 | 118699789 | + | 8.76E-06   | 0.00014694 | -46.34146341 |
| chr14 | 118892836 | 118892836 | - | 0          | 0          | -29.86213871 |
| chr14 | 118922620 | 118922620 | + | 0          | 0          | -32.84533195 |
| chr14 | 118922621 | 118922621 | - | 0          | 0          | -28.96689822 |
| chr14 | 118922628 | 118922628 | + | 0          | 0          | -33.95953468 |
| chr14 | 118922629 | 118922629 | - | 0          | 0          | -33.23980433 |
| chr14 | 120287260 | 120287260 | - | 0          | 0          | -37.3557693  |

|       |           |           |   |          |          |              |
|-------|-----------|-----------|---|----------|----------|--------------|
| chr14 | 120287599 | 120287599 | + | 0        | 0        | -37.5980174  |
| chr14 | 120287619 | 120287619 | + | 0        | 0        | -42.54448518 |
| chr14 | 120287634 | 120287634 | + | 0        | 0        | -33.14525051 |
| chr14 | 120287635 | 120287635 | - | 0        | 0        | -37.69828543 |
| chr14 | 120287644 | 120287644 | + | 0        | 0        | -26.65244192 |
| chr14 | 120287645 | 120287645 | - | 0        | 0        | -28.70725893 |
| chr14 | 120287646 | 120287646 | + | 0        | 0        | -29.01269612 |
| chr14 | 120287647 | 120287647 | - | 0        | 0        | -37.02344944 |
| chr14 | 120287679 | 120287679 | - | 0        | 0        | -32.04869909 |
| chr14 | 120287833 | 120287833 | - | 0        | 0        | -32.2368536  |
| chr14 | 120637934 | 120637934 | + | 0        | 0        | -31.53497593 |
| chr14 | 120637974 | 120637974 | + | 0        | 0        | -25.76096211 |
| chr14 | 120638031 | 120638031 | - | 0        | 0        | -39.08427196 |
| chr14 | 121270589 | 121270589 | - | 0        | 0        | -30.5067501  |
| chr14 | 121505337 | 121505337 | - | 0        | 0        | -32.62893323 |
| chr14 | 121505509 | 121505509 | - | 8.04E-13 | 3.75E-11 | -37.07763443 |
| chr14 | 121506743 | 121506743 | - | 9.47E-14 | 4.84E-12 | -26.50608968 |
| chr14 | 121506837 | 121506837 | - | 0        | 0        | -25.69939694 |
| chr14 | 121597272 | 121597272 | + | 0        | 0        | -25.67717362 |
| chr14 | 121597273 | 121597273 | - | 0        | 0        | -25.77668562 |
| chr14 | 121660618 | 121660618 | - | 0        | 0        | -30.50398915 |
| chr14 | 121660761 | 121660761 | - | 0        | 0        | -28.99423321 |
| chr14 | 121781479 | 121781479 | + | 5.83E-14 | 3.04E-12 | -31.87980299 |
| chr14 | 121781506 | 121781506 | + | 1.11E-16 | 7.26E-15 | -32.09449818 |
| chr14 | 121903449 | 121903449 | + | 1.50E-13 | 7.50E-12 | -28.50930746 |
| chr14 | 122105343 | 122105343 | - | 2.92E-12 | 1.29E-10 | -34.27230047 |
| chr14 | 122179629 | 122179629 | + | 0        | 0        | -27.4404131  |
| chr14 | 122227256 | 122227256 | + | 0        | 0        | -29.21994415 |
| chr14 | 122227257 | 122227257 | - | 2.22E-16 | 1.43E-14 | -36.22764228 |
| chr14 | 122227354 | 122227354 | + | 0        | 0        | -43.48360656 |
| chr14 | 122227375 | 122227375 | + | 0        | 0        | -39.41216877 |
| chr14 | 122227376 | 122227376 | - | 0        | 0        | -37.965112   |
| chr14 | 122227406 | 122227406 | - | 0        | 0        | -29.27770859 |
| chr14 | 122227413 | 122227413 | - | 0        | 0        | -27.57665361 |
| chr14 | 122227415 | 122227415 | + | 1.11E-16 | 7.26E-15 | -32.0168601  |
| chr14 | 122227430 | 122227430 | + | 0        | 0        | -39.78656801 |
| chr14 | 122227441 | 122227441 | + | 1.24E-11 | 5.12E-10 | -27.87946429 |
| chr14 | 122227459 | 122227459 | + | 2.44E-15 | 1.44E-13 | -41.1571558  |
| chr14 | 122229215 | 122229215 | + | 0        | 0        | -49.11368365 |
| chr14 | 122229242 | 122229242 | + | 0        | 0        | -28.24104126 |
| chr14 | 122229245 | 122229245 | + | 0        | 0        | -29.48943662 |

|       |           |           |   |            |            |              |
|-------|-----------|-----------|---|------------|------------|--------------|
| chr14 | 122229380 | 122229380 | + | 0          | 0          | -29.53293645 |
| chr14 | 122271289 | 122271289 | + | 0          | 0          | -25.27054631 |
| chr14 | 122462087 | 122462087 | + | 0          | 0          | -25.95617404 |
| chr14 | 122462108 | 122462108 | + | 0          | 0          | -32.21415183 |
| chr14 | 122462904 | 122462904 | + | 0          | 0          | -27.86847872 |
| chr14 | 122462910 | 122462910 | + | 0          | 0          | -32.21438393 |
| chr14 | 122462916 | 122462916 | + | 0          | 0          | -30.73905404 |
| chr14 | 122463071 | 122463071 | - | 0          | 0          | -34.47218268 |
| chr15 | 7223228   | 7223228   | - | 4.82E-06   | 8.60E-05   | -33.22592195 |
| chr15 | 8572403   | 8572403   | + | 3.63E-07   | 8.11E-06   | -25.44713447 |
| chr15 | 9094449   | 9094449   | - | 1.29E-12   | 5.90E-11   | -37.16905024 |
| chr15 | 9992344   | 9992344   | + | 0          | 0          | -26.12980769 |
| chr15 | 10237148  | 10237148  | - | 0          | 0          | -25.87242563 |
| chr15 | 11037647  | 11037647  | - | 0.00073223 | 0.00683057 | 36.8286445   |
| chr15 | 11037685  | 11037685  | - | 3.89E-08   | 1.02E-06   | -68.05555556 |
| chr15 | 12375265  | 12375265  | + | 0          | 0          | -25.46262706 |
| chr15 | 12425235  | 12425235  | + | 1.02E-09   | 3.36E-08   | -32.09459459 |
| chr15 | 12425516  | 12425516  | - | 8.75E-06   | 0.00014687 | -29.39958592 |
| chr15 | 12439113  | 12439113  | - | 0          | 0          | -29.85995211 |
| chr15 | 12502354  | 12502354  | - | 0          | 0          | -26.87358814 |
| chr15 | 12502382  | 12502382  | - | 0          | 0          | -28.21080341 |
| chr15 | 25445803  | 25445803  | + | 1.26E-07   | 3.06E-06   | -34.12056738 |
| chr15 | 25609244  | 25609244  | + | 7.87E-07   | 1.65E-05   | -28.63944333 |
| chr15 | 25621535  | 25621535  | - | 5.97E-10   | 2.02E-08   | -37.23404255 |
| chr15 | 25637955  | 25637955  | + | 1.35E-08   | 3.80E-07   | -26.36429277 |
| chr15 | 25758919  | 25758919  | + | 4.04E-06   | 7.32E-05   | -25.37035658 |
| chr15 | 27631194  | 27631194  | - | 0.00016746 | 0.00196786 | -32.60266371 |
| chr15 | 27631203  | 27631203  | - | 3.77E-07   | 8.39E-06   | -47.48904617 |
| chr15 | 27862989  | 27862989  | + | 5.69E-13   | 2.69E-11   | -48.84004884 |
| chr15 | 27863108  | 27863108  | - | 0          | 0          | -59.50193349 |
| chr15 | 27863124  | 27863124  | - | 0          | 0          | -28.75457875 |
| chr15 | 27898391  | 27898391  | + | 2.02E-08   | 5.55E-07   | -39.89361702 |
| chr15 | 28051511  | 28051511  | + | 0          | 0          | -30.94747212 |
| chr15 | 28051512  | 28051512  | - | 0          | 0          | -33.96543835 |
| chr15 | 28051524  | 28051524  | + | 0          | 0          | -28.24251681 |
| chr15 | 28051525  | 28051525  | - | 0          | 0          | -25.94280194 |
| chr15 | 30447634  | 30447634  | - | 0          | 0          | -37.13693405 |
| chr15 | 31254765  | 31254765  | - | 0.00013395 | 0.00162345 | -43.31983806 |
| chr15 | 31309699  | 31309699  | - | 3.19E-14   | 1.70E-12   | -27.08303074 |
| chr15 | 31309712  | 31309712  | - | 1.23E-10   | 4.53E-09   | -28.11059908 |
| chr15 | 31369090  | 31369090  | - | 3.93E-11   | 1.53E-09   | -48          |

|       |          |          |   |            |            |              |
|-------|----------|----------|---|------------|------------|--------------|
| chr15 | 31369135 | 31369135 | - | 6.68E-10   | 2.25E-08   | -54.56674473 |
| chr15 | 34316363 | 34316363 | + | 0.00039491 | 0.00408053 | -38.00773694 |
| chr15 | 36364313 | 36364313 | - | 2.51E-09   | 7.85E-08   | -25.02782931 |
| chr15 | 36381321 | 36381321 | + | 9.97E-12   | 4.15E-10   | -25.66849817 |
| chr15 | 36456524 | 36456524 | + | 1.55E-15   | 9.35E-14   | -28.5069255  |
| chr15 | 36456558 | 36456558 | - | 2.31E-12   | 1.03E-10   | -26.49735826 |
| chr15 | 36555469 | 36555469 | - | 0          | 0          | -26.05015783 |
| chr15 | 36656881 | 36656881 | - | 1.04E-07   | 2.56E-06   | -27.52314815 |
| chr15 | 36891930 | 36891930 | + | 5.72E-11   | 2.19E-09   | -69.66101695 |
| chr15 | 36891976 | 36891976 | + | 1.90E-08   | 5.23E-07   | -60.91954023 |
| chr15 | 36892690 | 36892690 | + | 0          | 0          | -28.34343149 |
| chr15 | 36892707 | 36892707 | + | 0          | 0          | -43.11573674 |
| chr15 | 36892724 | 36892724 | + | 0          | 0          | -44.05644914 |
| chr15 | 36892818 | 36892818 | - | 0          | 0          | -39.25483738 |
| chr15 | 36892850 | 36892850 | + | 9.62E-06   | 0.00015985 | -42.14285714 |
| chr15 | 36892851 | 36892851 | - | 1.44E-15   | 8.70E-14   | -25.76269884 |
| chr15 | 36892861 | 36892861 | + | 1.35E-05   | 0.00021683 | -34.54545455 |
| chr15 | 37234606 | 37234606 | + | 0          | 0          | -25.94948849 |
| chr15 | 37234607 | 37234607 | - | 0          | 0          | -28.70474759 |
| chr15 | 37234836 | 37234836 | - | 5.76E-13   | 2.72E-11   | -38.31845238 |
| chr15 | 37234869 | 37234869 | - | 1.83E-07   | 4.31E-06   | -25.06471753 |
| chr15 | 37242472 | 37242472 | + | 0          | 0          | -44.43586973 |
| chr15 | 37242491 | 37242491 | + | 0          | 0          | -35.55749606 |
| chr15 | 37242614 | 37242614 | - | 9.71E-07   | 2.00E-05   | -34.42169341 |
| chr15 | 37242644 | 37242644 | - | 5.69E-11   | 2.18E-09   | -44.89010989 |
| chr15 | 38077182 | 38077182 | + | 0          | 0          | -28.12310972 |
| chr15 | 38077183 | 38077183 | - | 0          | 0          | -35.38185561 |
| chr15 | 38077192 | 38077192 | + | 0          | 0          | -32.07681873 |
| chr15 | 38077193 | 38077193 | - | 0          | 0          | -36.23048314 |
| chr15 | 38077204 | 38077204 | - | 0          | 0          | -28.216971   |
| chr15 | 38138793 | 38138793 | + | 1.21E-05   | 0.00019565 | 55.74193548  |
| chr15 | 38198757 | 38198757 | + | 7.27E-10   | 2.44E-08   | -30.4138322  |
| chr15 | 38198763 | 38198763 | + | 7.66E-09   | 2.24E-07   | -27.28310502 |
| chr15 | 38198938 | 38198938 | - | 7.63E-12   | 3.21E-10   | -35.03401361 |
| chr15 | 38320322 | 38320322 | + | 0.00069903 | 0.0065731  | -27.67145136 |
| chr15 | 38406339 | 38406339 | + | 0          | 0          | -26.52159405 |
| chr15 | 38406364 | 38406364 | - | 0          | 0          | -30.21518808 |
| chr15 | 38578522 | 38578522 | + | 0          | 0          | -25.79848573 |
| chr15 | 39616510 | 39616510 | - | 1.58E-05   | 0.00024885 | -25.50685748 |
| chr15 | 43869015 | 43869015 | + | 0          | 0          | -25.80616318 |
| chr15 | 43869465 | 43869465 | - | 0.00014364 | 0.00172427 | 40.86687307  |

|       |          |          |   |            |            |              |
|-------|----------|----------|---|------------|------------|--------------|
| chr15 | 45992844 | 45992844 | - | 1.01E-05   | 0.00016762 | -52.24637681 |
| chr15 | 51775218 | 51775218 | - | 0.0003029  | 0.00326399 | -32.93108923 |
| chr15 | 55196440 | 55196440 | - | 0          | 0          | -43.09291982 |
| chr15 | 55196487 | 55196487 | - | 0          | 0          | -26.23407519 |
| chr15 | 55265518 | 55265518 | + | 2.22E-15   | 1.32E-13   | -26.30727123 |
| chr15 | 55265555 | 55265555 | + | 0          | 0          | -30.40205414 |
| chr15 | 55265664 | 55265664 | - | 0          | 0          | -56.35878421 |
| chr15 | 55265706 | 55265706 | - | 0          | 0          | -58.93327785 |
| chr15 | 55265709 | 55265709 | - | 0          | 0          | -36.91358025 |
| chr15 | 57749430 | 57749430 | + | 7.45E-12   | 3.14E-10   | -27.13121134 |
| chr15 | 58975250 | 58975250 | + | 0          | 0          | -27.55799672 |
| chr15 | 58975287 | 58975287 | - | 0          | 0          | -37.41170431 |
| chr15 | 58979951 | 58979951 | - | 2.49E-05   | 0.00037281 | -29.06976744 |
| chr15 | 59005506 | 59005506 | - | 0          | 0          | -27.42245526 |
| chr15 | 59083171 | 59083171 | + | 0          | 0          | -30.35948722 |
| chr15 | 59083172 | 59083172 | - | 0.00033237 | 0.00353    | -31.08831401 |
| chr15 | 59083236 | 59083236 | - | 0          | 0          | -36.84781182 |
| chr15 | 59083250 | 59083250 | - | 0          | 0          | -32.19781641 |
| chr15 | 59344444 | 59344444 | + | 1.01E-06   | 2.07E-05   | 44.23076923  |
| chr15 | 59634054 | 59634054 | - | 0          | 0          | -28.77756675 |
| chr15 | 59674189 | 59674189 | + | 0.00043256 | 0.00440362 | -35.78431373 |
| chr15 | 59674231 | 59674231 | - | 0          | 0          | -29.76886291 |
| chr15 | 59674275 | 59674275 | + | 0          | 0          | -25.15380686 |
| chr15 | 59674276 | 59674276 | - | 0          | 0          | -27.81004361 |
| chr15 | 59674284 | 59674284 | + | 0          | 0          | -33.28035465 |
| chr15 | 59674285 | 59674285 | - | 5.85E-06   | 0.00010229 | -31.95895522 |
| chr15 | 59680482 | 59680482 | + | 0          | 0          | -35.87366493 |
| chr15 | 59680483 | 59680483 | - | 0          | 0          | -36.8610536  |
| chr15 | 59680517 | 59680517 | + | 0          | 0          | -32.48303997 |
| chr15 | 59680518 | 59680518 | - | 0          | 0          | -34.62952226 |
| chr15 | 59680522 | 59680522 | + | 0          | 0          | -39.26663597 |
| chr15 | 59680527 | 59680527 | + | 0          | 0          | -43.65015423 |
| chr15 | 60822414 | 60822414 | + | 4.31E-12   | 1.86E-10   | -26.75869809 |
| chr15 | 60822506 | 60822506 | - | 0          | 0          | -25.39112051 |
| chr15 | 60822511 | 60822511 | - | 0          | 0          | -30.37167456 |
| chr15 | 60822532 | 60822532 | - | 0          | 0          | -32.90974927 |
| chr15 | 62181364 | 62181364 | + | 0          | 0          | -33.11713907 |
| chr15 | 62566246 | 62566246 | + | 0          | 0          | -25.0166334  |
| chr15 | 62566270 | 62566270 | + | 0          | 0          | -27.48084118 |
| chr15 | 63665394 | 63665394 | + | 0          | 0          | -28.75553447 |
| chr15 | 63665423 | 63665423 | + | 0          | 0          | -35.72211161 |

|       |          |          |   |            |            |              |
|-------|----------|----------|---|------------|------------|--------------|
| chr15 | 63671179 | 63671179 | + | 1.17E-07   | 2.85E-06   | -32.97035693 |
| chr15 | 63671210 | 63671210 | + | 0          | 0          | -30.31834696 |
| chr15 | 63671211 | 63671211 | - | 1.05E-11   | 4.35E-10   | -26.83503431 |
| chr15 | 63671236 | 63671236 | + | 0          | 0          | -37.09386628 |
| chr15 | 63671319 | 63671319 | - | 0          | 0          | -34.83890013 |
| chr15 | 64043340 | 64043340 | + | 0.00017351 | 0.00202915 | -30.54901961 |
| chr15 | 64269478 | 64269478 | - | 0          | 0          | -26.20996189 |
| chr15 | 66891224 | 66891224 | + | 0          | 0          | -45.80745342 |
| chr15 | 66962028 | 66962028 | + | 1.29E-05   | 0.00020772 | -27.31729055 |
| chr15 | 66970381 | 66970381 | + | 6.03E-09   | 1.79E-07   | -31.80500659 |
| chr15 | 67040301 | 67040301 | - | 0          | 0          | -27.32670796 |
| chr15 | 67040317 | 67040317 | + | 0          | 0          | -29.03835837 |
| chr15 | 67040318 | 67040318 | - | 0          | 0          | -29.21632057 |
| chr15 | 67040329 | 67040329 | - | 0          | 0          | -25.56755062 |
| chr15 | 69913956 | 69913956 | + | 8.60E-06   | 0.00014453 | -26.75753228 |
| chr15 | 72946224 | 72946224 | + | 4.55E-06   | 8.15E-05   | -30.18825639 |
| chr15 | 73062013 | 73062013 | + | 1.81E-06   | 3.53E-05   | -30.39832285 |
| chr15 | 73468078 | 73468078 | + | 0          | 0          | -47.16883341 |
| chr15 | 73468085 | 73468085 | + | 0          | 0          | -33.77714962 |
| chr15 | 73468118 | 73468118 | + | 0          | 0          | -32.24419282 |
| chr15 | 73468154 | 73468154 | - | 0          | 0          | -40.67070779 |
| chr15 | 73468192 | 73468192 | - | 0          | 0          | -25.93123953 |
| chr15 | 73536089 | 73536089 | + | 0          | 0          | -30.75075128 |
| chr15 | 73643874 | 73643874 | + | 0          | 0          | -32.58850713 |
| chr15 | 73744057 | 73744057 | + | 1.73E-05   | 0.0002705  | -27.92540023 |
| chr15 | 73744282 | 73744282 | - | 0          | 0          | -53.28913819 |
| chr15 | 73755392 | 73755392 | + | 0          | 0          | -30.9977264  |
| chr15 | 73856987 | 73856987 | + | 2.22E-16   | 1.43E-14   | -30.90183928 |
| chr15 | 73857002 | 73857002 | + | 0          | 0          | -33.51255515 |
| chr15 | 74517490 | 74517490 | - | 3.82E-06   | 6.96E-05   | -36.15384615 |
| chr15 | 74667539 | 74667539 | - | 1.82E-05   | 0.00028293 | -34.04558405 |
| chr15 | 74676503 | 74676503 | + | 4.20E-09   | 1.27E-07   | -42.12698413 |
| chr15 | 74749766 | 74749766 | - | 7.56E-05   | 0.00098904 | -44.38709677 |
| chr15 | 75689827 | 75689827 | - | 0.00030128 | 0.0032491  | -47.95783926 |
| chr15 | 75689833 | 75689833 | - | 4.11E-07   | 9.07E-06   | -65.74440053 |
| chr15 | 75708819 | 75708819 | - | 0          | 0          | -27.21549933 |
| chr15 | 75708850 | 75708850 | - | 0          | 0          | -32.80916428 |
| chr15 | 75708865 | 75708865 | + | 0          | 0          | -26.47544079 |
| chr15 | 75708866 | 75708866 | - | 0          | 0          | -33.56461733 |
| chr15 | 75708976 | 75708976 | + | 0          | 0          | -26.93724753 |
| chr15 | 75709011 | 75709011 | + | 0          | 0          | -34.83461102 |

|       |          |          |   |            |            |              |
|-------|----------|----------|---|------------|------------|--------------|
| chr15 | 75709022 | 75709022 | + | 0          | 0          | -33.62240589 |
| chr15 | 75724238 | 75724238 | - | 4.44E-11   | 1.72E-09   | -25.89037323 |
| chr15 | 75818767 | 75818767 | + | 0          | 0          | -26.37865177 |
| chr15 | 75818775 | 75818775 | + | 0          | 0          | -32.47281174 |
| chr15 | 75818926 | 75818926 | - | 2.56E-07   | 5.88E-06   | -33.49275362 |
| chr15 | 75818934 | 75818934 | - | 5.99E-06   | 0.00010448 | -29.38140529 |
| chr15 | 75908073 | 75908073 | + | 0.00013884 | 0.00167422 | -25.97402597 |
| chr15 | 75910625 | 75910625 | + | 0          | 0          | -27.34533415 |
| chr15 | 75910724 | 75910724 | + | 0          | 0          | -27.58482184 |
| chr15 | 75910725 | 75910725 | - | 0          | 0          | -34.50688266 |
| chr15 | 75910750 | 75910750 | - | 0          | 0          | -32.41043777 |
| chr15 | 76009078 | 76009078 | + | 1.57E-05   | 0.00024823 | -26.06516291 |
| chr15 | 76087178 | 76087178 | + | 4.32E-07   | 9.52E-06   | -37.10990502 |
| chr15 | 76087224 | 76087224 | + | 1.02E-08   | 2.92E-07   | -40.72963518 |
| chr15 | 76089813 | 76089813 | + | 3.82E-09   | 1.16E-07   | -55.88778147 |
| chr15 | 76090097 | 76090097 | + | 0          | 0          | -28.8822316  |
| chr15 | 76090101 | 76090101 | + | 0          | 0          | -40.03921326 |
| chr15 | 76090137 | 76090137 | - | 0          | 0          | -33.52573293 |
| chr15 | 76194662 | 76194662 | - | 2.90E-14   | 1.55E-12   | -26.78743961 |
| chr15 | 76194694 | 76194694 | - | 3.79E-11   | 1.48E-09   | -26.35321967 |
| chr15 | 76200475 | 76200475 | + | 0          | 0          | -29.83211395 |
| chr15 | 76200578 | 76200578 | - | 0          | 0          | -26.15848947 |
| chr15 | 76205643 | 76205643 | + | 2.44E-06   | 4.64E-05   | -28.80952381 |
| chr15 | 76205844 | 76205844 | - | 2.72E-09   | 8.46E-08   | -28.43822844 |
| chr15 | 76206038 | 76206038 | + | 4.99E-10   | 1.71E-08   | -26.39078    |
| chr15 | 76206048 | 76206048 | - | 1.02E-09   | 3.35E-08   | -25.70538744 |
| chr15 | 76206115 | 76206115 | + | 0          | 0          | -27.88962564 |
| chr15 | 76208938 | 76208938 | + | 3.66E-15   | 2.14E-13   | -28.66676778 |
| chr15 | 76229148 | 76229148 | - | 0          | 0          | -34.01791513 |
| chr15 | 76229150 | 76229150 | - | 0          | 0          | -29.87558032 |
| chr15 | 76229183 | 76229183 | - | 0          | 0          | -26.82361844 |
| chr15 | 76229206 | 76229206 | + | 0          | 0          | -25.62473002 |
| chr15 | 76229210 | 76229210 | + | 0          | 0          | -32.90423993 |
| chr15 | 76233410 | 76233410 | - | 0          | 0          | -32.15425239 |
| chr15 | 76293468 | 76293468 | + | 0          | 0          | -31.46504559 |
| chr15 | 76377828 | 76377828 | + | 0          | 0          | -27.42714036 |
| chr15 | 76458965 | 76458965 | - | 2.53E-12   | 1.12E-10   | -32.75007465 |
| chr15 | 76462098 | 76462098 | + | 5.74E-07   | 1.24E-05   | -38.63636364 |
| chr15 | 76462134 | 76462134 | + | 0.00049193 | 0.00490736 | -37.67942584 |
| chr15 | 76462293 | 76462293 | - | 1.34E-11   | 5.50E-10   | -27.03818259 |
| chr15 | 76466013 | 76466013 | - | 0.00031301 | 0.00335629 | -34.95276653 |

|       |          |          |   |            |            |              |
|-------|----------|----------|---|------------|------------|--------------|
| chr15 | 76517363 | 76517363 | - | 1.59E-11   | 6.49E-10   | -29.67969797 |
| chr15 | 76618530 | 76618530 | + | 2.03E-08   | 5.58E-07   | -32.40950226 |
| chr15 | 76666856 | 76666856 | + | 0          | 0          | -29.78300281 |
| chr15 | 76666911 | 76666911 | - | 0          | 0          | -33.22418585 |
| chr15 | 76666938 | 76666938 | + | 5.82E-10   | 1.98E-08   | -49.38604373 |
| chr15 | 76666939 | 76666939 | - | 0          | 0          | -36.58773429 |
| chr15 | 76666953 | 76666953 | + | 0.00026519 | 0.00291668 | -25.66137566 |
| chr15 | 76666960 | 76666960 | + | 8.38E-08   | 2.09E-06   | -43.56872636 |
| chr15 | 76666961 | 76666961 | - | 1.16E-08   | 3.31E-07   | -35.53082192 |
| chr15 | 76666965 | 76666965 | - | 1.21E-05   | 0.00019628 | -30.1369863  |
| chr15 | 76666967 | 76666967 | + | 0          | 0          | -44.47247374 |
| chr15 | 76666973 | 76666973 | + | 0          | 0          | -42.69145489 |
| chr15 | 76666994 | 76666994 | + | 0          | 0          | -50.53916239 |
| chr15 | 76667061 | 76667061 | - | 0          | 0          | -41.42603808 |
| chr15 | 76667077 | 76667077 | - | 0          | 0          | -48.83432788 |
| chr15 | 76667079 | 76667079 | - | 0          | 0          | -46.43337667 |
| chr15 | 76667094 | 76667094 | + | 0          | 0          | -49.24664091 |
| chr15 | 76667101 | 76667101 | + | 0          | 0          | -42.52951477 |
| chr15 | 76667217 | 76667217 | + | 5.43E-05   | 0.0007413  | -34.17190776 |
| chr15 | 76667245 | 76667245 | - | 0          | 0          | -33.54999726 |
| chr15 | 76667255 | 76667255 | - | 0          | 0          | -36.6534002  |
| chr15 | 76667258 | 76667258 | - | 0          | 0          | -32.07435132 |
| chr15 | 76667262 | 76667262 | - | 0          | 0          | -32.17946577 |
| chr15 | 76667291 | 76667291 | + | 1.29E-08   | 3.65E-07   | -33.69106141 |
| chr15 | 76667292 | 76667292 | - | 0          | 0          | -27.93597531 |
| chr15 | 76667294 | 76667294 | + | 9.76E-09   | 2.81E-07   | -34.87270156 |
| chr15 | 76667297 | 76667297 | + | 2.32E-08   | 6.32E-07   | -31.23376167 |
| chr15 | 76667309 | 76667309 | + | 1.55E-15   | 9.35E-14   | -48.51898206 |
| chr15 | 76725193 | 76725193 | - | 5.03E-06   | 8.93E-05   | -38.43137255 |
| chr15 | 77344267 | 77344267 | - | 0          | 0          | -29.88977156 |
| chr15 | 77344301 | 77344301 | + | 0          | 0          | -27.70737327 |
| chr15 | 77356785 | 77356785 | + | 0          | 0          | -28.74449923 |
| chr15 | 77356823 | 77356823 | + | 0          | 0          | -27.58246535 |
| chr15 | 77356851 | 77356851 | + | 1.71E-05   | 0.00026668 | -30.25       |
| chr15 | 77798182 | 77798182 | + | 0          | 0          | -29.25179003 |
| chr15 | 77798183 | 77798183 | - | 0          | 0          | -34.23726298 |
| chr15 | 77857926 | 77857926 | + | 1.36E-05   | 0.00021808 | -36.66666667 |
| chr15 | 77857931 | 77857931 | + | 4.66E-06   | 8.34E-05   | -40          |
| chr15 | 77857939 | 77857939 | + | 4.66E-06   | 8.34E-05   | -40          |
| chr15 | 77882908 | 77882908 | - | 0          | 0          | -28.31023568 |
| chr15 | 77882937 | 77882937 | - | 0          | 0          | -30.20590288 |



|       |          |          |   |            |            |              |
|-------|----------|----------|---|------------|------------|--------------|
| chr15 | 78081906 | 78081906 | + | 0.00023066 | 0.0025881  | -33.82059801 |
| chr15 | 78081949 | 78081949 | + | 0.00101252 | 0.00892205 | -36.521181   |
| chr15 | 78081951 | 78081951 | + | 6.23E-07   | 1.33E-05   | -50.64184852 |
| chr15 | 78188445 | 78188445 | + | 4.89E-05   | 0.00067653 | -28.57142857 |
| chr15 | 78409754 | 78409754 | + | 0          | 0          | -26.85227425 |
| chr15 | 78409944 | 78409944 | - | 0          | 0          | -42.82888913 |
| chr15 | 78410197 | 78410197 | - | 3.61E-14   | 1.92E-12   | -53.61111111 |
| chr15 | 78410199 | 78410199 | - | 0          | 0          | -67.48589847 |
| chr15 | 78410206 | 78410206 | - | 2.88E-07   | 6.54E-06   | -35.62091503 |
| chr15 | 78410209 | 78410209 | - | 0          | 0          | -68.89184216 |
| chr15 | 78410211 | 78410211 | - | 5.88E-13   | 2.78E-11   | -46.82715552 |
| chr15 | 78410224 | 78410224 | - | 2.35E-08   | 6.38E-07   | -35.87301587 |
| chr15 | 78410234 | 78410234 | - | 7.13E-11   | 2.70E-09   | -44.28887994 |
| chr15 | 78410237 | 78410237 | + | 4.79E-08   | 1.24E-06   | -26.38888889 |
| chr15 | 78410249 | 78410249 | + | 4.42E-14   | 2.33E-12   | -52.09181785 |
| chr15 | 78410255 | 78410255 | + | 6.27E-08   | 1.60E-06   | -30.15549796 |
| chr15 | 78410259 | 78410259 | + | 1.89E-15   | 1.13E-13   | -55.79150579 |
| chr15 | 78410568 | 78410568 | - | 0          | 0          | -38.83383157 |
| chr15 | 78410621 | 78410621 | + | 0          | 0          | -36.82176526 |
| chr15 | 78437035 | 78437035 | + | 1.11E-16   | 7.26E-15   | -38.29275362 |
| chr15 | 78437044 | 78437044 | + | 0          | 0          | -46.50144928 |
| chr15 | 78437045 | 78437045 | - | 0          | 0          | -57.38464248 |
| chr15 | 78437070 | 78437070 | + | 9.31E-12   | 3.89E-10   | -32.08197371 |
| chr15 | 78437071 | 78437071 | - | 0          | 0          | -42.33112257 |
| chr15 | 78437074 | 78437074 | - | 0          | 0          | -44.4722875  |
| chr15 | 78438509 | 78438509 | - | 0          | 0          | -25.71497616 |
| chr15 | 78635975 | 78635975 | + | 3.59E-14   | 1.90E-12   | -30.57324841 |
| chr15 | 78671996 | 78671996 | - | 0          | 0          | -27.58359128 |
| chr15 | 78672051 | 78672051 | + | 0          | 0          | -32.10479985 |
| chr15 | 78672174 | 78672174 | - | 6.52E-07   | 1.39E-05   | -26.89935065 |
| chr15 | 78672177 | 78672177 | - | 2.78E-12   | 1.23E-10   | -39.53741497 |
| chr15 | 78672186 | 78672186 | - | 7.47E-07   | 1.58E-05   | -25.2659781  |
| chr15 | 78672198 | 78672198 | - | 1.85E-11   | 7.48E-10   | -36.98842898 |
| chr15 | 78672212 | 78672212 | - | 1.11E-13   | 5.63E-12   | -38.48120182 |
| chr15 | 78674550 | 78674550 | - | 0          | 0          | -28.8803582  |
| chr15 | 78684321 | 78684321 | + | 1.20E-07   | 2.90E-06   | -27.28732411 |
| chr15 | 78684340 | 78684340 | + | 9.50E-12   | 3.96E-10   | -35.1143009  |
| chr15 | 78684357 | 78684357 | + | 3.73E-08   | 9.83E-07   | -26.87135097 |
| chr15 | 78684490 | 78684490 | - | 0          | 0          | -28.20578744 |
| chr15 | 78802052 | 78802052 | - | 0          | 0          | -35.55264674 |
| chr15 | 78802057 | 78802057 | - | 0          | 0          | -39.27181419 |

|       |          |          |   |           |            |              |
|-------|----------|----------|---|-----------|------------|--------------|
| chr15 | 78803573 | 78803573 | - | 4.54E-08  | 1.18E-06   | -38.6977887  |
| chr15 | 78803576 | 78803576 | + | 0         | 0          | -42.11045365 |
| chr15 | 78803593 | 78803593 | + | 0         | 0          | -31.98134134 |
| chr15 | 78803594 | 78803594 | - | 0         | 0          | -30.53342316 |
| chr15 | 78803642 | 78803642 | + | 0         | 0          | -27.96243901 |
| chr15 | 78803643 | 78803643 | - | 0         | 0          | -30.42166978 |
| chr15 | 78832555 | 78832555 | - | 1.13E-14  | 6.30E-13   | -36.61736371 |
| chr15 | 78832875 | 78832875 | + | 0         | 0          | -25.49905399 |
| chr15 | 78832896 | 78832896 | + | 0         | 0          | -30.09569072 |
| chr15 | 78833055 | 78833055 | + | 0         | 0          | -26.10652697 |
| chr15 | 78833069 | 78833069 | + | 9.44E-06  | 0.00015715 | -62.77777778 |
| chr15 | 78844265 | 78844265 | + | 0         | 0          | -32.14553638 |
| chr15 | 78844266 | 78844266 | - | 0         | 0          | -25.08365827 |
| chr15 | 78844841 | 78844841 | + | 3.26E-05  | 0.00047412 | -32.40207373 |
| chr15 | 78844844 | 78844844 | + | 0.0004927 | 0.00491384 | -27.04493088 |
| chr15 | 78844857 | 78844857 | + | 2.63E-06  | 4.98E-05   | -36.48235621 |
| chr15 | 78844886 | 78844886 | + | 5.69E-11  | 2.18E-09   | -49.91928975 |
| chr15 | 78859958 | 78859958 | - | 1.63E-07  | 3.87E-06   | -36.51985888 |
| chr15 | 78889698 | 78889698 | + | 1.22E-12  | 5.57E-11   | -38.24494549 |
| chr15 | 78889722 | 78889722 | + | 1.55E-15  | 9.35E-14   | -35.1195078  |
| chr15 | 78889723 | 78889723 | - | 0         | 0          | -34.082969   |
| chr15 | 78889765 | 78889765 | - | 0         | 0          | -27.6082752  |
| chr15 | 78894384 | 78894384 | + | 0         | 0          | -27.08184585 |
| chr15 | 78923000 | 78923000 | + | 8.19E-14  | 4.21E-12   | -30.52636495 |
| chr15 | 78923044 | 78923044 | + | 5.65E-12  | 2.41E-10   | -27.53442077 |
| chr15 | 78942721 | 78942721 | - | 0         | 0          | -31.2441815  |
| chr15 | 78977135 | 78977135 | + | 8.88E-15  | 4.99E-13   | -28.06498481 |
| chr15 | 78977158 | 78977158 | + | 0         | 0          | -30.4308674  |
| chr15 | 79025744 | 79025744 | + | 0         | 0          | -27.99446679 |
| chr15 | 79044646 | 79044646 | - | 3.29E-07  | 7.40E-06   | -61.19047619 |
| chr15 | 79436565 | 79436565 | + | 2.34E-09  | 7.34E-08   | -28.86412653 |
| chr15 | 79517156 | 79517156 | + | 1.21E-11  | 4.99E-10   | -57.95559667 |
| chr15 | 79740222 | 79740222 | - | 0         | 0          | -32.59852217 |
| chr15 | 79740226 | 79740226 | - | 3.09E-14  | 1.65E-12   | -28.27038862 |
| chr15 | 79792725 | 79792725 | - | 0         | 0          | -25.34519154 |
| chr15 | 79933440 | 79933440 | + | 0         | 0          | -29.37794938 |
| chr15 | 79933441 | 79933441 | - | 0         | 0          | -31.99295949 |
| chr15 | 79935770 | 79935770 | + | 0         | 0          | -26.80247079 |
| chr15 | 79951063 | 79951063 | - | 0         | 0          | -34.6465318  |
| chr15 | 79952145 | 79952145 | - | 0         | 0          | -25.79578411 |
| chr15 | 80004364 | 80004364 | + | 0         | 0          | -31.47504376 |

|       |          |          |   |            |            |              |
|-------|----------|----------|---|------------|------------|--------------|
| chr15 | 80004445 | 80004445 | + | 1.11E-15   | 6.76E-14   | -35.07414915 |
| chr15 | 80004446 | 80004446 | - | 0          | 0          | -26.96557457 |
| chr15 | 80009694 | 80009694 | + | 0          | 0          | -28.34783443 |
| chr15 | 80009739 | 80009739 | - | 0          | 0          | -33.97753567 |
| chr15 | 80024064 | 80024064 | + | 4.62E-05   | 0.00064377 | -38.1920904  |
| chr15 | 80025837 | 80025837 | - | 0          | 0          | -25.26337781 |
| chr15 | 80051344 | 80051344 | + | 6.20E-08   | 1.58E-06   | -27.66666667 |
| chr15 | 80051586 | 80051586 | - | 5.88E-15   | 3.37E-13   | -27.30777704 |
| chr15 | 80051590 | 80051590 | + | 0          | 0          | -39.75744731 |
| chr15 | 80051617 | 80051617 | + | 0          | 0          | -43.28341295 |
| chr15 | 80051672 | 80051672 | + | 0          | 0          | -30.67487242 |
| chr15 | 80051673 | 80051673 | - | 0          | 0          | -34.13465661 |
| chr15 | 80051688 | 80051688 | + | 0          | 0          | -34.03962311 |
| chr15 | 80051712 | 80051712 | + | 0          | 0          | -45.36506571 |
| chr15 | 80052065 | 80052065 | + | 0          | 0          | -32.56484486 |
| chr15 | 80052075 | 80052075 | + | 0          | 0          | -32.4329661  |
| chr15 | 80052159 | 80052159 | + | 0          | 0          | -31.26353631 |
| chr15 | 80052160 | 80052160 | - | 0          | 0          | -32.07185845 |
| chr15 | 80057362 | 80057362 | + | 0          | 0          | -27.65531891 |
| chr15 | 80057451 | 80057451 | - | 0          | 0          | -41.22971253 |
| chr15 | 80057455 | 80057455 | - | 0          | 0          | -40.27096504 |
| chr15 | 80057482 | 80057482 | - | 0          | 0          | -29.06605411 |
| chr15 | 80057484 | 80057484 | + | 5.86E-08   | 1.50E-06   | -41.07142857 |
| chr15 | 80092442 | 80092442 | + | 4.44E-16   | 2.79E-14   | -36.56949028 |
| chr15 | 80092562 | 80092562 | - | 0          | 0          | -38.97607096 |
| chr15 | 80092581 | 80092581 | - | 0          | 0          | -30.09311795 |
| chr15 | 80092583 | 80092583 | - | 0          | 0          | -39.18725356 |
| chr15 | 80092598 | 80092598 | + | 1.67E-15   | 9.99E-14   | -30.27514191 |
| chr15 | 80092599 | 80092599 | - | 0          | 0          | -37.00939432 |
| chr15 | 80092766 | 80092766 | - | 3.33E-16   | 2.11E-14   | -28.45507394 |
| chr15 | 80332907 | 80332907 | - | 0.00032132 | 0.00343149 | -36.00543478 |
| chr15 | 80364263 | 80364263 | - | 0          | 0          | -25.92911872 |
| chr15 | 80452613 | 80452613 | - | 0          | 0          | -26.29699374 |
| chr15 | 80452627 | 80452627 | + | 9.77E-15   | 5.47E-13   | -25.70709106 |
| chr15 | 80458049 | 80458049 | - | 0.00041759 | 0.00427593 | -26.76311031 |
| chr15 | 80626497 | 80626497 | - | 0          | 0          | -28.37967302 |
| chr15 | 80671438 | 80671438 | + | 0          | 0          | -30.04098361 |
| chr15 | 81049796 | 81049796 | - | 1.87E-12   | 8.42E-11   | -27.69847824 |
| chr15 | 81142288 | 81142288 | + | 0          | 0          | -42.24660397 |
| chr15 | 81142311 | 81142311 | + | 0          | 0          | -38.7434717  |
| chr15 | 81142312 | 81142312 | - | 0          | 0          | -35.47991505 |

|       |          |          |   |            |            |              |
|-------|----------|----------|---|------------|------------|--------------|
| chr15 | 81142345 | 81142345 | - | 0          | 0          | -34.39302564 |
| chr15 | 81142353 | 81142353 | - | 0          | 0          | -35.19550901 |
| chr15 | 81191467 | 81191467 | + | 3.25E-08   | 8.65E-07   | -33.41224747 |
| chr15 | 81694954 | 81694954 | - | 0          | 0          | -29.14608372 |
| chr15 | 81933233 | 81933233 | + | 1.32E-07   | 3.19E-06   | -29.19920858 |
| chr15 | 81937299 | 81937299 | + | 1.80E-05   | 0.00027977 | -26.03379416 |
| chr15 | 81943216 | 81943216 | - | 0          | 0          | -26.96690822 |
| chr15 | 82155205 | 82155205 | - | 5.30E-05   | 0.00072581 | -37.14001986 |
| chr15 | 82164565 | 82164565 | + | 0          | 0          | -29.47659864 |
| chr15 | 82205705 | 82205705 | - | 0.00046307 | 0.00466427 | -25.85262634 |
| chr15 | 82911557 | 82911557 | + | 0          | 0          | -25.27466486 |
| chr15 | 82917451 | 82917451 | - | 0          | 0          | -31.39937845 |
| chr15 | 82917534 | 82917534 | + | 0          | 0          | -27.38730196 |
| chr15 | 82917584 | 82917584 | - | 0          | 0          | -34.70083869 |
| chr15 | 82917604 | 82917604 | - | 0          | 0          | -32.64659477 |
| chr15 | 82917614 | 82917614 | - | 0          | 0          | -26.50717797 |
| chr15 | 82917654 | 82917654 | - | 0          | 0          | -38.73192436 |
| chr15 | 82952369 | 82952369 | + | 0          | 0          | -29.18499574 |
| chr15 | 82952394 | 82952394 | + | 0          | 0          | -35.90560384 |
| chr15 | 82952447 | 82952447 | - | 0          | 0          | -28.21136089 |
| chr15 | 82952465 | 82952465 | + | 0          | 0          | -37.98814198 |
| chr15 | 82952466 | 82952466 | - | 0          | 0          | -35.1348324  |
| chr15 | 82952470 | 82952470 | + | 0          | 0          | -35.69338484 |
| chr15 | 82952471 | 82952471 | - | 0          | 0          | -38.62897747 |
| chr15 | 82952475 | 82952475 | + | 0          | 0          | -41.38875702 |
| chr15 | 82952476 | 82952476 | - | 0          | 0          | -39.5309539  |
| chr15 | 82952477 | 82952477 | + | 0          | 0          | -34.15101501 |
| chr15 | 82952478 | 82952478 | - | 0          | 0          | -30.93217541 |
| chr15 | 82961238 | 82961238 | + | 1.11E-16   | 7.26E-15   | -25.30634529 |
| chr15 | 82961347 | 82961347 | - | 0          | 0          | -32.67151767 |
| chr15 | 82961361 | 82961361 | + | 0          | 0          | -35.33436003 |
| chr15 | 82961363 | 82961363 | + | 0          | 0          | -32.00832428 |
| chr15 | 82961402 | 82961402 | + | 0          | 0          | -36.8355786  |
| chr15 | 82968770 | 82968770 | - | 7.97E-08   | 1.99E-06   | -31.23605533 |
| chr15 | 82968799 | 82968799 | - | 0.00049456 | 0.00492925 | -26.72946718 |
| chr15 | 82983211 | 82983211 | + | 0          | 0          | -33.17731348 |
| chr15 | 82983242 | 82983242 | + | 0          | 0          | -26.63185133 |
| chr15 | 82983243 | 82983243 | - | 0          | 0          | -33.58456434 |
| chr15 | 82983272 | 82983272 | - | 0          | 0          | -27.0115459  |
| chr15 | 82993061 | 82993061 | + | 0          | 0          | -28.76207339 |
| chr15 | 82993069 | 82993069 | + | 0          | 0          | -27.04145964 |

|       |          |          |   |            |            |              |
|-------|----------|----------|---|------------|------------|--------------|
| chr15 | 83089408 | 83089408 | + | 0          | 0          | -40.56413339 |
| chr15 | 83089412 | 83089412 | + | 0          | 0          | -27.12497383 |
| chr15 | 83089546 | 83089546 | - | 8.43E-09   | 2.45E-07   | -25.06166593 |
| chr15 | 83251907 | 83251907 | - | 1.44E-15   | 8.70E-14   | -30.00344284 |
| chr15 | 83523447 | 83523447 | + | 0          | 0          | -44.30535913 |
| chr15 | 83523474 | 83523474 | + | 4.44E-16   | 2.79E-14   | -42.04991033 |
| chr15 | 83525624 | 83525624 | + | 0.00106741 | 0.0093129  | -32.86956522 |
| chr15 | 83525788 | 83525788 | - | 3.89E-15   | 2.26E-13   | -26.91842685 |
| chr15 | 83527496 | 83527496 | - | 0          | 0          | -28.80687094 |
| chr15 | 83527504 | 83527504 | - | 0          | 0          | -32.84932806 |
| chr15 | 83527533 | 83527533 | - | 0          | 0          | -26.84697603 |
| chr15 | 83594015 | 83594015 | + | 2.27E-06   | 4.35E-05   | -38.75       |
| chr15 | 84238707 | 84238707 | - | 0          | 0          | -25.33630316 |
| chr15 | 84239345 | 84239345 | + | 1.23E-05   | 0.00019939 | -31.06060606 |
| chr15 | 84239346 | 84239346 | - | 0          | 0          | -34.31347563 |
| chr15 | 84239350 | 84239350 | + | 2.65E-08   | 7.15E-07   | -43.70874587 |
| chr15 | 84239351 | 84239351 | - | 1.11E-16   | 7.26E-15   | -33.65052272 |
| chr15 | 84239353 | 84239353 | + | 1.09E-06   | 2.23E-05   | -36.67719853 |
| chr15 | 84239354 | 84239354 | - | 0          | 0          | -41.36627907 |
| chr15 | 84239356 | 84239356 | - | 4.44E-16   | 2.79E-14   | -31.67377854 |
| chr15 | 84239361 | 84239361 | - | 1.31E-13   | 6.61E-12   | -30.03405636 |
| chr15 | 84239363 | 84239363 | + | 1.32E-12   | 6.02E-11   | -50.69950739 |
| chr15 | 84239364 | 84239364 | - | 0          | 0          | -43.91050089 |
| chr15 | 84314540 | 84314540 | - | 1.82E-06   | 3.56E-05   | -31.68067227 |
| chr15 | 84409457 | 84409457 | - | 0.00010357 | 0.00130002 | -29.76190476 |
| chr15 | 84420227 | 84420227 | + | 2.09E-09   | 6.61E-08   | -40.82417582 |
| chr15 | 84420253 | 84420253 | + | 1.02E-08   | 2.92E-07   | -39.15618735 |
| chr15 | 84466864 | 84466864 | - | 0          | 0          | -27.24993935 |
| chr15 | 84467001 | 84467001 | - | 0          | 0          | -27.26769912 |
| chr15 | 84545257 | 84545257 | + | 7.01E-05   | 0.00092669 | -40.97222222 |
| chr15 | 84621851 | 84621851 | + | 0.00011654 | 0.00143848 | -31.71247357 |
| chr15 | 84719566 | 84719566 | + | 3.56E-11   | 1.39E-09   | -32.63662512 |
| chr15 | 84719567 | 84719567 | - | 8.50E-10   | 2.83E-08   | -30.60464529 |
| chr15 | 84756458 | 84756458 | + | 0          | 0          | -40.4241478  |
| chr15 | 84756463 | 84756463 | + | 0          | 0          | -33.94403678 |
| chr15 | 84756468 | 84756468 | + | 0          | 0          | -37.79694864 |
| chr15 | 84756496 | 84756496 | + | 0          | 0          | -26.05440777 |
| chr15 | 84756505 | 84756505 | + | 0          | 0          | -28.72650195 |
| chr15 | 84756584 | 84756584 | - | 0          | 0          | -26.68510939 |
| chr15 | 84756593 | 84756593 | - | 0          | 0          | -31.60645141 |
| chr15 | 84756608 | 84756608 | + | 0          | 0          | -30.08257879 |

|       |          |          |   |            |            |              |
|-------|----------|----------|---|------------|------------|--------------|
| chr15 | 84756609 | 84756609 | - | 0          | 0          | -34.8985013  |
| chr15 | 84756644 | 84756644 | + | 0          | 0          | -42.99812389 |
| chr15 | 84756709 | 84756709 | - | 0          | 0          | -36.06600314 |
| chr15 | 84756755 | 84756755 | + | 0          | 0          | -41.78549242 |
| chr15 | 84756756 | 84756756 | - | 0          | 0          | -38.90810277 |
| chr15 | 84756760 | 84756760 | + | 0          | 0          | -38.8574651  |
| chr15 | 84756784 | 84756784 | + | 0          | 0          | -33.94440878 |
| chr15 | 84845125 | 84845125 | + | 5.16E-05   | 0.00070938 | -38.91834571 |
| chr15 | 85034159 | 85034159 | - | 0          | 0          | -28.72392842 |
| chr15 | 85167262 | 85167262 | + | 0          | 0          | -28.92083866 |
| chr15 | 85337306 | 85337306 | + | 3.16E-05   | 0.00046095 | -25.01936945 |
| chr15 | 85524796 | 85524796 | + | 2.77E-13   | 1.35E-11   | -37.67478709 |
| chr15 | 85524843 | 85524843 | + | 4.25E-08   | 1.11E-06   | -29.80839195 |
| chr15 | 85543027 | 85543027 | + | 0          | 0          | -31.65340293 |
| chr15 | 85543058 | 85543058 | + | 0          | 0          | -31.70642686 |
| chr15 | 85543836 | 85543836 | - | 7.51E-06   | 0.00012797 | -25.83708146 |
| chr15 | 85606254 | 85606254 | - | 0          | 0          | -26.567757   |
| chr15 | 85615323 | 85615323 | - | 7.67E-06   | 0.00013044 | -25.39764511 |
| chr15 | 85615351 | 85615351 | + | 1.09E-06   | 2.23E-05   | -27.08545557 |
| chr15 | 85615376 | 85615376 | + | 7.60E-08   | 1.91E-06   | -32.88288288 |
| chr15 | 85615394 | 85615394 | + | 6.83E-08   | 1.73E-06   | -31.61490683 |
| chr15 | 85724674 | 85724674 | - | 0          | 0          | -25.05843769 |
| chr15 | 85943175 | 85943175 | - | 8.62E-14   | 4.42E-12   | -38.20224719 |
| chr15 | 85949595 | 85949595 | - | 0.00061692 | 0.0059281  | -25.6155303  |
| chr15 | 85961358 | 85961358 | + | 0          | 0          | -36.3124946  |
| chr15 | 85961367 | 85961367 | + | 0          | 0          | -34.58251709 |
| chr15 | 85992994 | 85992994 | - | 0          | 0          | -29.32578187 |
| chr15 | 85994453 | 85994453 | - | 1.87E-11   | 7.56E-10   | -27.63717805 |
| chr15 | 86028260 | 86028260 | - | 0          | 0          | -25.73054767 |
| chr15 | 86060929 | 86060929 | - | 0          | 0          | -26.65233477 |
| chr15 | 86060959 | 86060959 | + | 1.44E-15   | 8.70E-14   | -30.15623218 |
| chr15 | 86081206 | 86081206 | + | 2.43E-08   | 6.60E-07   | -30.19253772 |
| chr15 | 86081210 | 86081210 | + | 1.74E-08   | 4.83E-07   | -30.54316752 |
| chr15 | 86081232 | 86081232 | + | 3.31E-07   | 7.44E-06   | -27.68799102 |
| chr15 | 86081239 | 86081239 | + | 1.24E-06   | 2.50E-05   | -26.61309108 |
| chr15 | 86676181 | 86676181 | - | 7.97E-06   | 0.0001349  | -29.55246914 |
| chr15 | 88839365 | 88839365 | + | 5.73E-11   | 2.19E-09   | -25.51360973 |
| chr15 | 89060622 | 89060622 | + | 0          | 0          | -49.7041245  |
| chr15 | 89060627 | 89060627 | + | 2.54E-13   | 1.24E-11   | -31.81413169 |
| chr15 | 89068118 | 89068118 | - | 0          | 0          | -28.19067456 |
| chr15 | 89068130 | 89068130 | - | 0          | 0          | -27.33312041 |

|       |          |          |   |            |            |              |
|-------|----------|----------|---|------------|------------|--------------|
| chr15 | 89068160 | 89068160 | + | 1.52E-06   | 3.01E-05   | -37.41258741 |
| chr15 | 89068162 | 89068162 | + | 2.64E-06   | 4.99E-05   | -37.02267881 |
| chr15 | 89068332 | 89068332 | - | 1.11E-16   | 7.26E-15   | -28.61203642 |
| chr15 | 89068335 | 89068335 | - | 1.78E-15   | 1.06E-13   | -27.56973686 |
| chr15 | 89068343 | 89068343 | + | 0          | 0          | -26.83364809 |
| chr15 | 89068346 | 89068346 | + | 0          | 0          | -25.0118788  |
| chr15 | 89068350 | 89068350 | + | 0          | 0          | -26.18855714 |
| chr15 | 89068360 | 89068360 | + | 0          | 0          | -25.14260082 |
| chr15 | 89068391 | 89068391 | - | 0          | 0          | -36.50426608 |
| chr15 | 89068398 | 89068398 | - | 0          | 0          | -35.82338641 |
| chr15 | 89068400 | 89068400 | - | 0          | 0          | -29.03359024 |
| chr15 | 89068414 | 89068414 | - | 0          | 0          | -25.31993033 |
| chr15 | 89068422 | 89068422 | - | 0          | 0          | -36.23463582 |
| chr15 | 89127918 | 89127918 | - | 0.00013458 | 0.00162996 | -28.28282828 |
| chr15 | 89181290 | 89181290 | - | 8.99E-15   | 5.05E-13   | -26.05121966 |
| chr15 | 89322905 | 89322905 | + | 1.99E-11   | 8.02E-10   | -51.11111111 |
| chr15 | 89322921 | 89322921 | + | 0.00014375 | 0.00172542 | -26.40062598 |
| chr15 | 89322932 | 89322932 | + | 1.12E-07   | 2.74E-06   | -38.92009988 |
| chr15 | 89323130 | 89323130 | - | 2.00E-15   | 1.19E-13   | -33.51313321 |
| chr15 | 89323159 | 89323159 | - | 8.14E-14   | 4.18E-12   | -31.9843713  |
| chr15 | 89323163 | 89323163 | - | 0          | 0          | -43.97005554 |
| chr15 | 89323166 | 89323166 | + | 6.79E-13   | 3.19E-11   | -33.86115032 |
| chr15 | 89323167 | 89323167 | - | 1.11E-16   | 7.26E-15   | -39.43728685 |
| chr15 | 89323321 | 89323321 | - | 0          | 0          | -25.78614152 |
| chr15 | 89323351 | 89323351 | - | 0          | 0          | -27.91428803 |
| chr15 | 89377056 | 89377056 | + | 2.39E-09   | 7.49E-08   | -25.64671101 |
| chr15 | 89377227 | 89377227 | - | 1.05E-14   | 5.88E-13   | -46.95484991 |
| chr15 | 89377237 | 89377237 | - | 2.69E-09   | 8.36E-08   | -33.64567716 |
| chr15 | 89400959 | 89400959 | - | 0          | 0          | -25.16591154 |
| chr15 | 89425484 | 89425484 | + | 1.20E-14   | 6.65E-13   | -26.0977682  |
| chr15 | 89488788 | 89488788 | - | 0          | 0          | -29.23008153 |
| chr15 | 89488823 | 89488823 | - | 0          | 0          | -36.73185936 |
| chr15 | 89571882 | 89571882 | + | 0          | 0          | -25.71679528 |
| chr15 | 89606552 | 89606552 | + | 0          | 0          | -29.74792687 |
| chr15 | 93752012 | 93752012 | + | 0          | 0          | -25.19584615 |
| chr15 | 94344868 | 94344868 | + | 0.00034077 | 0.00360592 | 27.24021084  |
| chr15 | 94599305 | 94599305 | + | 0          | 0          | -25.2770528  |
| chr15 | 94599307 | 94599307 | + | 0          | 0          | -28.21830207 |
| chr15 | 94855442 | 94855442 | + | 4.58E-05   | 0.00063978 | -31.94067643 |
| chr15 | 95789767 | 95789767 | - | 4.81E-13   | 2.29E-11   | -41.50736102 |
| chr15 | 95789816 | 95789816 | - | 0          | 0          | -57.22689076 |

|       |          |          |   |            |            |              |
|-------|----------|----------|---|------------|------------|--------------|
| chr15 | 95963265 | 95963265 | + | 0          | 0          | -33.86688783 |
| chr15 | 96135438 | 96135438 | - | 0          | 0          | -27.30609124 |
| chr15 | 96135512 | 96135512 | + | 0          | 0          | -25.52136142 |
| chr15 | 96135656 | 96135656 | - | 0          | 0          | -27.9589372  |
| chr15 | 96695557 | 96695557 | + | 0          | 0          | -35.68826438 |
| chr15 | 96695558 | 96695558 | - | 0          | 0          | -29.9587373  |
| chr15 | 96701065 | 96701065 | - | 0          | 0          | -36.93491285 |
| chr15 | 97073860 | 97073860 | - | 2.00E-12   | 8.95E-11   | -51.02040816 |
| chr15 | 97323732 | 97323732 | - | 5.30E-08   | 1.36E-06   | -52.04741379 |
| chr15 | 97323765 | 97323765 | - | 1.10E-05   | 0.00017954 | -32.25806452 |
| chr15 | 97373449 | 97373449 | + | 0          | 0          | -28.39264817 |
| chr15 | 97373470 | 97373470 | + | 0          | 0          | -32.50057269 |
| chr15 | 97373471 | 97373471 | - | 1.11E-16   | 7.26E-15   | -28.77916267 |
| chr15 | 97373488 | 97373488 | - | 0          | 0          | -34.53797468 |
| chr15 | 97373739 | 97373739 | - | 0.0001266  | 0.00154572 | -25.34965035 |
| chr15 | 97373752 | 97373752 | + | 4.77E-13   | 2.27E-11   | -32.27272727 |
| chr15 | 97377376 | 97377376 | + | 7.55E-07   | 1.59E-05   | -33.43859649 |
| chr15 | 97379961 | 97379961 | - | 7.77E-16   | 4.79E-14   | -35.37093637 |
| chr15 | 97379976 | 97379976 | + | 0          | 0          | -27.24156118 |
| chr15 | 97379994 | 97379994 | + | 0          | 0          | -26.59159527 |
| chr15 | 97380110 | 97380110 | - | 9.99E-15   | 5.59E-13   | -43.55635384 |
| chr15 | 97380137 | 97380137 | - | 4.38E-11   | 1.70E-09   | -37.63197587 |
| chr15 | 97745585 | 97745585 | + | 0.00054762 | 0.00536862 | 26.65964173  |
| chr15 | 97765550 | 97765550 | + | 3.33E-16   | 2.11E-14   | -32.71565495 |
| chr15 | 97765643 | 97765643 | - | 0          | 0          | -37.57861635 |
| chr15 | 97766567 | 97766567 | + | 6.38E-08   | 1.62E-06   | -40.66193853 |
| chr15 | 97766767 | 97766767 | - | 0          | 0          | -30.15308615 |
| chr15 | 97774117 | 97774117 | + | 0.00075642 | 0.00701786 | -34.24242424 |
| chr15 | 97782541 | 97782541 | + | 0          | 0          | -35.59944835 |
| chr15 | 97782696 | 97782696 | - | 4.71E-07   | 1.03E-05   | -25.80645161 |
| chr15 | 97782744 | 97782744 | - | 1.84E-14   | 1.01E-12   | -28.37988146 |
| chr15 | 97788893 | 97788893 | - | 1.36E-06   | 2.73E-05   | -25.53750597 |
| chr15 | 97813568 | 97813568 | + | 0          | 0          | -28.99317776 |
| chr15 | 97817626 | 97817626 | - | 1.20E-08   | 3.40E-07   | -27.18462824 |
| chr15 | 97817646 | 97817646 | - | 2.34E-11   | 9.36E-10   | -28.76660342 |
| chr15 | 97822601 | 97822601 | - | 0          | 0          | -33.3733562  |
| chr15 | 97830567 | 97830567 | - | 0          | 0          | -34.94688737 |
| chr15 | 97878805 | 97878805 | + | 0          | 0          | -36.24973257 |
| chr15 | 97890106 | 97890106 | + | 0          | 0          | -25.01031995 |
| chr15 | 98144796 | 98144796 | + | 1.41E-07   | 3.39E-06   | -31.97598861 |
| chr15 | 98631406 | 98631406 | + | 1.11E-16   | 7.26E-15   | -27.53204126 |



|       |          |          |   |            |            |              |
|-------|----------|----------|---|------------|------------|--------------|
| chr15 | 98636001 | 98636001 | + | 7.51E-11   | 2.83E-09   | -25.19634113 |
| chr15 | 98636505 | 98636505 | - | 0          | 0          | -25.1163649  |
| chr15 | 98774106 | 98774106 | + | 0          | 0          | -25.92346165 |
| chr15 | 98774203 | 98774203 | + | 0          | 0          | -27.85143434 |
| chr15 | 98776935 | 98776935 | - | 0          | 0          | -48.54093567 |
| chr15 | 98776942 | 98776942 | - | 0          | 0          | -46.50451887 |
| chr15 | 98776947 | 98776947 | + | 3.50E-05   | 0.00050369 | -26.62337662 |
| chr15 | 98776948 | 98776948 | - | 0          | 0          | -37.31606238 |
| chr15 | 98780483 | 98780483 | + | 0          | 0          | -25.99763113 |
| chr15 | 98780511 | 98780511 | + | 0          | 0          | -31.34209279 |
| chr15 | 98780616 | 98780616 | - | 0          | 0          | -27.89384427 |
| chr15 | 98780629 | 98780629 | - | 0          | 0          | -31.76402209 |
| chr15 | 98780774 | 98780774 | - | 0          | 0          | -51.84130645 |
| chr15 | 98780780 | 98780780 | - | 0          | 0          | -45.64898135 |
| chr15 | 98780783 | 98780783 | - | 0          | 0          | -48.50742009 |
| chr15 | 98780800 | 98780800 | - | 0          | 0          | -29.32549795 |
| chr15 | 98780818 | 98780818 | - | 0          | 0          | -42.48470109 |
| chr15 | 98803151 | 98803151 | - | 4.34E-05   | 0.00060986 | -26.53215637 |
| chr15 | 98806658 | 98806658 | - | 0          | 0          | -40.04554865 |
| chr15 | 98806679 | 98806679 | + | 0          | 0          | -32.83371348 |
| chr15 | 98891143 | 98891143 | - | 5.44E-07   | 1.18E-05   | -29.65440357 |
| chr15 | 98891185 | 98891185 | - | 5.63E-07   | 1.21E-05   | -35.70234114 |
| chr15 | 98896172 | 98896172 | + | 6.26E-14   | 3.25E-12   | -27.61388982 |
| chr15 | 98898848 | 98898848 | - | 3.77E-15   | 2.20E-13   | -25.90331742 |
| chr15 | 98991581 | 98991581 | + | 3.19E-12   | 1.40E-10   | -30.93720548 |
| chr15 | 99019276 | 99019276 | + | 0          | 0          | -28.49478221 |
| chr15 | 99019309 | 99019309 | + | 0          | 0          | -26.53961236 |
| chr15 | 99019330 | 99019330 | - | 0          | 0          | -27.88652881 |
| chr15 | 99054958 | 99054958 | + | 2.41E-13   | 1.18E-11   | -30.18589744 |
| chr15 | 99084905 | 99084905 | - | 0          | 0          | -39.43827257 |
| chr15 | 99084922 | 99084922 | - | 0          | 0          | -29.43563569 |
| chr15 | 99093340 | 99093340 | + | 0          | 0          | -30.14305514 |
| chr15 | 99096578 | 99096578 | + | 0          | 0          | -31.98353647 |
| chr15 | 99127659 | 99127659 | + | 0          | 0          | -37.52991663 |
| chr15 | 99329330 | 99329330 | + | 0          | 0          | -27.3173357  |
| chr15 | 99329331 | 99329331 | - | 0          | 0          | -31.3529827  |
| chr15 | 99329339 | 99329339 | - | 1.11E-16   | 7.26E-15   | -25.59508295 |
| chr15 | 99329360 | 99329360 | - | 0          | 0          | -34.09497991 |
| chr15 | 99392422 | 99392422 | - | 0          | 0          | -30.20649853 |
| chr15 | 99418132 | 99418132 | - | 0          | 0          | -28.52219951 |
| chr15 | 99510015 | 99510015 | - | 0.00052999 | 0.0052238  | -27.12820513 |

|       |           |           |   |            |            |              |
|-------|-----------|-----------|---|------------|------------|--------------|
| chr15 | 99527727  | 99527727  | + | 0          | 0          | -27.79474945 |
| chr15 | 99600229  | 99600229  | - | 0          | 0          | -34.72985389 |
| chr15 | 99654027  | 99654027  | - | 1.05E-09   | 3.47E-08   | -25.67615033 |
| chr15 | 99704428  | 99704428  | - | 0          | 0          | -32.77035781 |
| chr15 | 99704515  | 99704515  | + | 0          | 0          | -32.3481381  |
| chr15 | 99704516  | 99704516  | - | 0          | 0          | -36.44110707 |
| chr15 | 99704583  | 99704583  | - | 0          | 0          | -25.80225548 |
| chr15 | 99860191  | 99860191  | + | 2.97E-05   | 0.00043645 | -28.11188811 |
| chr15 | 99862640  | 99862640  | - | 0          | 0          | -34.6488547  |
| chr15 | 99862643  | 99862643  | - | 0          | 0          | -31.98536395 |
| chr15 | 100271627 | 100271627 | + | 9.44E-15   | 5.29E-13   | -27.36655281 |
| chr15 | 100422279 | 100422279 | - | 0.00047503 | 0.0047651  | -30.28883685 |
| chr15 | 100577990 | 100577990 | + | 0.00040941 | 0.00420567 | -29.62962963 |
| chr15 | 100628112 | 100628112 | + | 1.69E-13   | 8.40E-12   | -42.45901639 |
| chr15 | 100681056 | 100681056 | - | 8.46E-12   | 3.55E-10   | -35.78102879 |
| chr15 | 100685342 | 100685342 | - | 1.11E-16   | 7.26E-15   | -42.94202899 |
| chr15 | 100685347 | 100685347 | - | 0          | 0          | -43.8125     |
| chr15 | 100685352 | 100685352 | - | 0          | 0          | -52.14583333 |
| chr15 | 100729897 | 100729897 | - | 0          | 0          | -25.75501205 |
| chr15 | 100729915 | 100729915 | + | 0          | 0          | -30.40275314 |
| chr15 | 100972979 | 100972979 | - | 5.27E-07   | 1.14E-05   | -27.07271076 |
| chr15 | 100972986 | 100972986 | - | 3.78E-05   | 0.00053857 | -27.8021978  |
| chr15 | 101044718 | 101044718 | + | 1.79E-07   | 4.23E-06   | -25.58971201 |
| chr15 | 101066599 | 101066599 | - | 1.81E-05   | 0.00028044 | -33.03571429 |
| chr15 | 101079559 | 101079559 | + | 0          | 0          | -38.3336367  |
| chr15 | 101079584 | 101079584 | + | 0          | 0          | -33.24807457 |
| chr15 | 101079600 | 101079600 | + | 0          | 0          | -40.6091595  |
| chr15 | 101133044 | 101133044 | - | 0          | 0          | -29.40945163 |
| chr15 | 101133132 | 101133132 | - | 0          | 0          | -26.5117211  |
| chr15 | 101133211 | 101133211 | - | 1.99E-13   | 9.84E-12   | -28.24305904 |
| chr15 | 101134177 | 101134177 | + | 0          | 0          | -25.17182464 |
| chr15 | 101135626 | 101135626 | + | 2.22E-16   | 1.43E-14   | -31.73413012 |
| chr15 | 101135635 | 101135635 | + | 1.11E-16   | 7.26E-15   | -31.45899971 |
| chr15 | 101164537 | 101164537 | - | 8.22E-14   | 4.22E-12   | -25.78628268 |
| chr15 | 101190729 | 101190729 | + | 0.00047122 | 0.00473313 | -25.79530561 |
| chr15 | 101225417 | 101225417 | - | 8.12E-06   | 0.00013731 | -28.07017544 |
| chr15 | 101308824 | 101308824 | + | 0          | 0          | -31.74019196 |
| chr15 | 101308852 | 101308852 | + | 0          | 0          | -30.18369101 |
| chr15 | 101308853 | 101308853 | - | 0          | 0          | -32.51410711 |
| chr15 | 101308874 | 101308874 | - | 0          | 0          | -25.82935288 |
| chr15 | 101351990 | 101351990 | - | 0          | 0          | -36.39530028 |

|       |           |           |   |            |            |              |
|-------|-----------|-----------|---|------------|------------|--------------|
| chr15 | 101364307 | 101364307 | - | 0.00014253 | 0.00171278 | 45.45454545  |
| chr15 | 101421140 | 101421140 | - | 0          | 0          | -32.52342745 |
| chr15 | 101766357 | 101766357 | - | 4.13E-07   | 9.12E-06   | -25.10953825 |
| chr15 | 101930688 | 101930688 | + | 0          | 0          | -30.42682145 |
| chr15 | 101942827 | 101942827 | + | 0.00044763 | 0.00453322 | -27.21088435 |
| chr15 | 101955100 | 101955100 | + | 5.55E-08   | 1.42E-06   | 45.22691706  |
| chr15 | 102004442 | 102004442 | - | 2.22E-06   | 4.25E-05   | -36.75757576 |
| chr15 | 102004480 | 102004480 | - | 1.07E-09   | 3.53E-08   | -44.0444092  |
| chr15 | 102026764 | 102026764 | - | 3.33E-16   | 2.11E-14   | -30.33707865 |
| chr15 | 102026789 | 102026789 | + | 1.52E-09   | 4.88E-08   | -31.39422496 |
| chr15 | 102107080 | 102107080 | - | 1.59E-11   | 6.49E-10   | -25.98007364 |
| chr15 | 102107107 | 102107107 | - | 0          | 0          | -35.5548272  |
| chr15 | 102107111 | 102107111 | - | 8.88E-16   | 5.45E-14   | -31.2254902  |
| chr15 | 102107114 | 102107114 | + | 1.60E-06   | 3.16E-05   | -29.13805352 |
| chr15 | 102107121 | 102107121 | + | 3.53E-06   | 6.49E-05   | -28.06832298 |
| chr15 | 102107308 | 102107308 | - | 1.62E-05   | 0.00025501 | -29.74017193 |
| chr15 | 102107333 | 102107333 | - | 3.18E-07   | 7.17E-06   | -34.82758621 |
| chr15 | 102118165 | 102118165 | + | 0          | 0          | -31.63432292 |
| chr15 | 102118173 | 102118173 | + | 5.55E-16   | 3.46E-14   | -25.83814808 |
| chr15 | 102144282 | 102144282 | + | 0          | 0          | -37.31801313 |
| chr15 | 102144286 | 102144286 | + | 0          | 0          | -27.66628604 |
| chr15 | 102144370 | 102144370 | + | 0          | 0          | -35.62475097 |
| chr15 | 102144457 | 102144457 | + | 0          | 0          | -29.87171869 |
| chr15 | 102144458 | 102144458 | - | 0          | 0          | -32.74988844 |
| chr15 | 102144610 | 102144610 | - | 0          | 0          | -28.87525978 |
| chr15 | 102144623 | 102144623 | - | 0          | 0          | -28.94362939 |
| chr15 | 102144631 | 102144631 | - | 0          | 0          | -34.10898694 |
| chr15 | 102144673 | 102144673 | + | 0          | 0          | -29.55784868 |
| chr15 | 102144700 | 102144700 | - | 0          | 0          | -34.48164412 |
| chr15 | 102144706 | 102144706 | - | 0          | 0          | -33.00106232 |
| chr15 | 102144730 | 102144730 | + | 3.70E-05   | 0.00052914 | -25.35714286 |
| chr15 | 102144731 | 102144731 | - | 0          | 0          | -34.92547425 |
| chr15 | 102144763 | 102144763 | + | 8.96E-12   | 3.75E-10   | -30.17314962 |
| chr15 | 102157031 | 102157031 | + | 0          | 0          | -27.92433505 |
| chr15 | 102240717 | 102240717 | - | 0          | 0          | -32.24852071 |
| chr15 | 102256601 | 102256601 | - | 1.63E-07   | 3.86E-06   | -34.07005838 |
| chr15 | 102256862 | 102256862 | - | 2.10E-07   | 4.88E-06   | -26.07361963 |
| chr15 | 102258914 | 102258914 | + | 0          | 0          | -40.46248602 |
| chr15 | 102259102 | 102259102 | - | 1.58E-09   | 5.06E-08   | -28.86851154 |
| chr15 | 102356327 | 102356327 | - | 0          | 0          | -26.4088686  |
| chr15 | 102366445 | 102366445 | + | 1.56E-13   | 7.81E-12   | -27.49685139 |

|       |           |           |   |            |            |              |
|-------|-----------|-----------|---|------------|------------|--------------|
| chr15 | 102366463 | 102366463 | + | 7.18E-12   | 3.03E-10   | -25.79690461 |
| chr15 | 102370648 | 102370648 | + | 0          | 0          | -34.02404594 |
| chr15 | 102370793 | 102370793 | - | 0          | 0          | -28.68552637 |
| chr15 | 102370801 | 102370801 | - | 0          | 0          | -27.68000729 |
| chr15 | 102386972 | 102386972 | - | 5.52E-05   | 0.00075249 | -27.65306122 |
| chr15 | 102511758 | 102511758 | - | 2.44E-05   | 0.00036643 | -28.18905473 |
| chr15 | 102673698 | 102673698 | + | 0          | 0          | -34.57418739 |
| chr15 | 102673877 | 102673877 | + | 0          | 0          | -25.8433261  |
| chr15 | 102673912 | 102673912 | + | 0          | 0          | -26.48900539 |
| chr15 | 103012330 | 103012330 | - | 6.00E-15   | 3.43E-13   | -33.97879754 |
| chr15 | 103015622 | 103015622 | - | 0          | 0          | -30.85367247 |
| chr15 | 103035944 | 103035944 | + | 0          | 0          | -29.41625188 |
| chr15 | 103039144 | 103039144 | + | 0          | 0          | -27.45608443 |
| chr15 | 103115166 | 103115166 | + | 0.00103004 | 0.00904832 | -28.34612106 |
| chr15 | 103168025 | 103168025 | - | 0          | 0          | -25.47639132 |
| chr15 | 103170397 | 103170397 | + | 3.84E-09   | 1.17E-07   | -27.75293923 |
| chr15 | 103186201 | 103186201 | + | 0.00025313 | 0.00280198 | -25.08196721 |
| chr15 | 103308468 | 103308468 | + | 2.60E-13   | 1.27E-11   | -28.33540373 |
| chr15 | 103308471 | 103308471 | + | 1.11E-16   | 7.26E-15   | -35.48865449 |
| chr15 | 103308489 | 103308489 | + | 0          | 0          | -29.11940299 |
| chr15 | 103308509 | 103308509 | + | 0          | 0          | -51.90139973 |
| chr15 | 103308516 | 103308516 | + | 0          | 0          | -51.19356645 |
| chr15 | 103308762 | 103308762 | + | 0.00024874 | 0.00276075 | -25.5852001  |
| chr15 | 103308790 | 103308790 | + | 9.74E-07   | 2.01E-05   | -32.36936292 |
| chr15 | 103309004 | 103309004 | - | 3.91E-12   | 1.70E-10   | -32.97095197 |
| chr15 | 103309021 | 103309021 | - | 8.04E-08   | 2.01E-06   | -25.95041322 |
| chr15 | 103309042 | 103309042 | - | 2.44E-09   | 7.64E-08   | -25.26315789 |
| chr15 | 103309128 | 103309128 | + | 6.83E-05   | 0.00090625 | -27.73279352 |
| chr15 | 103314541 | 103314541 | - | 5.88E-15   | 3.37E-13   | -25.30443513 |
| chr15 | 103315139 | 103315139 | - | 1.50E-06   | 2.98E-05   | -52.14285714 |
| chr15 | 103315149 | 103315149 | - | 6.01E-07   | 1.29E-05   | -52.08333333 |
| chr15 | 103315158 | 103315158 | - | 5.97E-05   | 0.0008061  | -41.66666667 |
| chr15 | 103315183 | 103315183 | + | 0          | 0          | -39.36999454 |
| chr15 | 103315184 | 103315184 | - | 1.98E-09   | 6.26E-08   | -62.28571429 |
| chr15 | 103315220 | 103315220 | + | 0          | 0          | -45.32824296 |
| chr15 | 103315258 | 103315258 | - | 0          | 0          | -45.79416769 |
| chr15 | 103315289 | 103315289 | + | 0          | 0          | -27.89142781 |
| chr15 | 103315290 | 103315290 | - | 0          | 0          | -36.10102138 |
| chr15 | 103323075 | 103323075 | + | 0          | 0          | -26.98451244 |
| chr15 | 103339100 | 103339100 | + | 0          | 0          | -26.99167867 |
| chr15 | 103529552 | 103529552 | + | 0          | 0          | -28.39418646 |

|       |           |           |   |            |            |              |
|-------|-----------|-----------|---|------------|------------|--------------|
| chr15 | 103529569 | 103529569 | + | 0          | 0          | -34.07407407 |
| chr16 | 3689581   | 3689581   | + | 4.44E-16   | 2.79E-14   | -33.58101135 |
| chr16 | 3689593   | 3689593   | + | 5.39E-11   | 2.07E-09   | -25.09182152 |
| chr16 | 4418916   | 4418916   | + | 0          | 0          | -28.10022769 |
| chr16 | 4418944   | 4418944   | + | 0          | 0          | -29.59227699 |
| chr16 | 4419171   | 4419171   | - | 0          | 0          | -25.57292891 |
| chr16 | 4593565   | 4593565   | + | 0.00036102 | 0.00378515 | -28.86446886 |
| chr16 | 4593849   | 4593849   | - | 9.82E-06   | 0.00016281 | -36.61897191 |
| chr16 | 4603194   | 4603194   | + | 5.46E-05   | 0.00074514 | -51.30434783 |
| chr16 | 4603380   | 4603380   | - | 5.88E-06   | 0.0001028  | -25.22416107 |
| chr16 | 4670519   | 4670519   | + | 3.55E-05   | 0.00051057 | -30.23655914 |
| chr16 | 4718549   | 4718549   | + | 2.37E-08   | 6.44E-07   | -34.70996217 |
| chr16 | 5089224   | 5089224   | + | 0.00035227 | 0.00370702 | -31.42857143 |
| chr16 | 8828890   | 8828890   | + | 0.00018544 | 0.00214837 | -31.66666667 |
| chr16 | 9196106   | 9196106   | + | 1.61E-07   | 3.83E-06   | -26.86174585 |
| chr16 | 10299782  | 10299782  | - | 3.00E-11   | 1.19E-09   | -31.29521115 |
| chr16 | 10788656  | 10788656  | - | 6.54E-06   | 0.00011303 | -26.50423244 |
| chr16 | 10796658  | 10796658  | + | 0          | 0          | -26.67210638 |
| chr16 | 10796664  | 10796664  | + | 0          | 0          | -37.98820696 |
| chr16 | 10796673  | 10796673  | + | 0          | 0          | -37.2969859  |
| chr16 | 10796682  | 10796682  | + | 0          | 0          | -32.56405519 |
| chr16 | 10796685  | 10796685  | + | 0          | 0          | -39.77277426 |
| chr16 | 10796710  | 10796710  | - | 0          | 0          | -37.93406313 |
| chr16 | 10796719  | 10796719  | - | 0          | 0          | -25.58781811 |
| chr16 | 10796747  | 10796747  | - | 0          | 0          | -31.50151277 |
| chr16 | 10811333  | 10811333  | - | 0          | 0          | -27.10390148 |
| chr16 | 10811459  | 10811459  | - | 0          | 0          | -28.17445483 |
| chr16 | 10868150  | 10868150  | + | 1.15E-06   | 2.34E-05   | -27.65868012 |
| chr16 | 10979213  | 10979213  | + | 0          | 0          | -27.46410691 |
| chr16 | 10979240  | 10979240  | + | 0          | 0          | -25.76588602 |
| chr16 | 10979241  | 10979241  | - | 0          | 0          | -32.23055022 |
| chr16 | 11494973  | 11494973  | + | 8.30E-11   | 3.12E-09   | -26.98412698 |
| chr16 | 11494974  | 11494974  | - | 3.55E-05   | 0.00051029 | -27.43589744 |
| chr16 | 11494994  | 11494994  | + | 4.62E-14   | 2.43E-12   | -29.81189851 |
| chr16 | 11631573  | 11631573  | + | 0          | 0          | -35.89822699 |
| chr16 | 11631659  | 11631659  | - | 0          | 0          | -25.61314791 |
| chr16 | 11631678  | 11631678  | - | 0          | 0          | -29.31623688 |
| chr16 | 13446743  | 13446743  | + | 0.00033966 | 0.00359612 | -40.25974026 |
| chr16 | 13447041  | 13447041  | + | 0          | 0          | -29.23883782 |
| chr16 | 13447080  | 13447080  | + | 0          | 0          | -30.66625493 |
| chr16 | 13447081  | 13447081  | - | 0          | 0          | -28.33557348 |

|       |          |          |   |          |            |              |
|-------|----------|----------|---|----------|------------|--------------|
| chr16 | 13447119 | 13447119 | + | 4.60E-12 | 1.98E-10   | -26.39380904 |
| chr16 | 13868174 | 13868174 | - | 0        | 0          | -33.92070807 |
| chr16 | 13868187 | 13868187 | - | 7.66E-15 | 4.33E-13   | -26.16008023 |
| chr16 | 13868203 | 13868203 | - | 6.99E-14 | 3.62E-12   | -25.52325581 |
| chr16 | 13868263 | 13868263 | + | 0        | 0          | -32.36259542 |
| chr16 | 16912157 | 16912157 | + | 2.86E-13 | 1.39E-11   | -35.18653101 |
| chr16 | 17078833 | 17078833 | - | 1.69E-07 | 3.99E-06   | -26.52894491 |
| chr16 | 17144040 | 17144040 | + | 3.08E-06 | 5.73E-05   | -25.87591241 |
| chr16 | 17148115 | 17148115 | + | 0        | 0          | -36.2386425  |
| chr16 | 17148116 | 17148116 | - | 0        | 0          | -34.46094609 |
| chr16 | 17148162 | 17148162 | + | 0        | 0          | -34.73522532 |
| chr16 | 17148163 | 17148163 | - | 0        | 0          | -34.96899049 |
| chr16 | 17148193 | 17148193 | + | 0        | 0          | -35.09914193 |
| chr16 | 17148194 | 17148194 | - | 0        | 0          | -36.52135984 |
| chr16 | 17148211 | 17148211 | + | 0        | 0          | -40.94950289 |
| chr16 | 17148230 | 17148230 | + | 0        | 0          | -46.24506249 |
| chr16 | 17148232 | 17148232 | + | 0        | 0          | -36.09355509 |
| chr16 | 17148274 | 17148274 | - | 0        | 0          | -37.42665253 |
| chr16 | 17148292 | 17148292 | - | 0        | 0          | -44.0681676  |
| chr16 | 17232920 | 17232920 | + | 0        | 0          | -26.06943596 |
| chr16 | 17232961 | 17232961 | + | 0        | 0          | -34.33808837 |
| chr16 | 17232962 | 17232962 | - | 0        | 0          | -28.49716881 |
| chr16 | 17255027 | 17255027 | + | 0        | 0          | -28.72373869 |
| chr16 | 17255066 | 17255066 | - | 0        | 0          | -43.70617067 |
| chr16 | 17490185 | 17490185 | + | 4.07E-09 | 1.24E-07   | -32.1355398  |
| chr16 | 17499587 | 17499587 | - | 0        | 0          | -31.69612572 |
| chr16 | 17559372 | 17559372 | - | 9.88E-06 | 0.00016373 | -36.58385093 |
| chr16 | 17560990 | 17560990 | + | 1.48E-05 | 0.00023511 | -27.29875708 |
| chr16 | 17560994 | 17560994 | + | 8.22E-08 | 2.05E-06   | -25.46487603 |
| chr16 | 17561023 | 17561023 | + | 4.55E-07 | 9.98E-06   | -31.22413144 |
| chr16 | 17815015 | 17815015 | + | 1.64E-08 | 4.55E-07   | -33.25017405 |
| chr16 | 17927375 | 17927375 | + | 0        | 0          | -30.57847782 |
| chr16 | 18154676 | 18154676 | - | 1.78E-15 | 1.06E-13   | -26.96692112 |
| chr16 | 18154712 | 18154712 | + | 0        | 0          | -25.95301479 |
| chr16 | 18154713 | 18154713 | - | 0        | 0          | -25.67959575 |
| chr16 | 18235936 | 18235936 | - | 0        | 0          | -30.32940598 |
| chr16 | 18347923 | 18347923 | + | 0        | 0          | -26.91017789 |
| chr16 | 18416522 | 18416522 | + | 0        | 0          | -26.61836664 |
| chr16 | 18416540 | 18416540 | + | 0        | 0          | -28.31336744 |
| chr16 | 18416612 | 18416612 | - | 0        | 0          | -31.35051774 |
| chr16 | 18583287 | 18583287 | + | 0        | 0          | -28.19394571 |

|       |          |          |   |          |            |              |
|-------|----------|----------|---|----------|------------|--------------|
| chr16 | 18584646 | 18584646 | + | 4.72E-14 | 2.48E-12   | -30.73372721 |
| chr16 | 18585491 | 18585491 | + | 0        | 0          | -37.88225188 |
| chr16 | 18585528 | 18585528 | + | 0        | 0          | -27.12786208 |
| chr16 | 18585553 | 18585553 | - | 0        | 0          | -33.26149833 |
| chr16 | 18585745 | 18585745 | - | 0        | 0          | -41.20519481 |
| chr16 | 18585752 | 18585752 | - | 0        | 0          | -46.83902041 |
| chr16 | 18585764 | 18585764 | - | 0        | 0          | -36.28139418 |
| chr16 | 18586115 | 18586115 | + | 0        | 0          | -38.63983113 |
| chr16 | 18586116 | 18586116 | - | 0        | 0          | -34.51003292 |
| chr16 | 18588685 | 18588685 | + | 1.11E-16 | 7.26E-15   | -37.00770548 |
| chr16 | 18588686 | 18588686 | - | 0        | 0          | -36.57894737 |
| chr16 | 18588692 | 18588692 | + | 3.52E-13 | 1.70E-11   | -28.63395225 |
| chr16 | 18588726 | 18588726 | + | 0        | 0          | -43.94896315 |
| chr16 | 18588890 | 18588890 | - | 0        | 0          | -40.04587156 |
| chr16 | 18588894 | 18588894 | - | 0        | 0          | -38.35341365 |
| chr16 | 18588909 | 18588909 | - | 0        | 0          | -36.59613916 |
| chr16 | 18588920 | 18588920 | + | 0        | 0          | -27.5        |
| chr16 | 18588921 | 18588921 | - | 0        | 0          | -28.20698005 |
| chr16 | 18588938 | 18588938 | + | 0        | 0          | -45.3125     |
| chr16 | 18588939 | 18588939 | - | 0        | 0          | -44.26508071 |
| chr16 | 18588946 | 18588946 | + | 0        | 0          | -33.4956964  |
| chr16 | 18588947 | 18588947 | - | 0        | 0          | -26.55857086 |
| chr16 | 18588957 | 18588957 | + | 0        | 0          | -33.12101911 |
| chr16 | 18588958 | 18588958 | - | 0        | 0          | -33.1304269  |
| chr16 | 18588965 | 18588965 | + | 0        | 0          | -30.61345178 |
| chr16 | 18588966 | 18588966 | - | 0        | 0          | -32.16323094 |
| chr16 | 18588970 | 18588970 | + | 0        | 0          | -25.14865431 |
| chr16 | 18588971 | 18588971 | - | 0        | 0          | -29.40224612 |
| chr16 | 18622945 | 18622945 | - | 1.40E-08 | 3.93E-07   | -30.53140097 |
| chr16 | 18622952 | 18622952 | - | 4.34E-07 | 9.54E-06   | -25.89371981 |
| chr16 | 18624048 | 18624048 | + | 0        | 0          | -27.38536418 |
| chr16 | 18624153 | 18624153 | + | 1.47E-05 | 0.00023297 | -26.71782763 |
| chr16 | 18683780 | 18683780 | - | 8.21E-08 | 2.05E-06   | -27.98444628 |
| chr16 | 18733612 | 18733612 | + | 1.22E-05 | 0.00019795 | -37.53246753 |
| chr16 | 18775988 | 18775988 | + | 0        | 0          | -29.6509192  |
| chr16 | 18775999 | 18775999 | + | 0        | 0          | -28.82452122 |
| chr16 | 18776064 | 18776064 | - | 0        | 0          | -30.1580947  |
| chr16 | 20701657 | 20701657 | + | 1.08E-11 | 4.46E-10   | -32.08114611 |
| chr16 | 20701898 | 20701898 | - | 1.76E-09 | 5.61E-08   | -48.17251462 |
| chr16 | 20701906 | 20701906 | + | 0        | 0          | -39.25781078 |
| chr16 | 20702055 | 20702055 | - | 0        | 0          | -52.45402663 |

|       |          |          |   |            |            |              |
|-------|----------|----------|---|------------|------------|--------------|
| chr16 | 20702086 | 20702086 | - | 0          | 0          | -51.99441057 |
| chr16 | 20713760 | 20713760 | - | 0          | 0          | -26.48685645 |
| chr16 | 21000216 | 21000216 | - | 2.95E-06   | 5.52E-05   | -26.74418605 |
| chr16 | 21080637 | 21080637 | + | 0.00014458 | 0.00173407 | -30.76923077 |
| chr16 | 21247020 | 21247020 | - | 0          | 0          | -26.90141601 |
| chr16 | 21247052 | 21247052 | + | 0.00014026 | 0.00168919 | -36.96343402 |
| chr16 | 21247276 | 21247276 | - | 7.85E-06   | 0.00013306 | -28.28129317 |
| chr16 | 21247614 | 21247614 | + | 0          | 0          | -43.82712723 |
| chr16 | 21247632 | 21247632 | + | 0          | 0          | -29.00555475 |
| chr16 | 21247797 | 21247797 | - | 1.33E-10   | 4.89E-09   | -28.08209279 |
| chr16 | 21277753 | 21277753 | - | 3.33E-16   | 2.11E-14   | -26.90195515 |
| chr16 | 21402190 | 21402190 | + | 2.33E-08   | 6.33E-07   | -28.08312514 |
| chr16 | 21450016 | 21450016 | + | 0          | 0          | -34.43216099 |
| chr16 | 21450075 | 21450075 | - | 0          | 0          | -26.26995646 |
| chr16 | 21595807 | 21595807 | + | 1.07E-07   | 2.62E-06   | -33.14040329 |
| chr16 | 21644448 | 21644448 | + | 0          | 0          | -25.95347432 |
| chr16 | 21644540 | 21644540 | - | 0          | 0          | -27.30745153 |
| chr16 | 21908753 | 21908753 | - | 0.00019169 | 0.00220988 | -29.91452991 |
| chr16 | 22373004 | 22373004 | + | 0          | 0          | -25.08106468 |
| chr16 | 22440744 | 22440744 | - | 0          | 0          | -34.53866075 |
| chr16 | 22469670 | 22469670 | - | 5.11E-07   | 1.11E-05   | -34.95061728 |
| chr16 | 22572871 | 22572871 | - | 1.72E-09   | 5.49E-08   | -30.64516129 |
| chr16 | 22572898 | 22572898 | - | 1.82E-05   | 0.00028183 | -28.78024194 |
| chr16 | 22790238 | 22790238 | - | 7.27E-06   | 0.00012425 | -28.99047619 |
| chr16 | 23214517 | 23214517 | - | 0          | 0          | -32.20779221 |
| chr16 | 24057257 | 24057257 | + | 0          | 0          | -25.42890293 |
| chr16 | 24235090 | 24235090 | + | 4.48E-08   | 1.17E-06   | -41.42857143 |
| chr16 | 24235112 | 24235112 | + | 2.58E-07   | 5.93E-06   | -38.15934066 |
| chr16 | 24392657 | 24392657 | - | 2.21E-10   | 7.90E-09   | -25.05081301 |
| chr16 | 24394898 | 24394898 | + | 0          | 0          | -30.37240537 |
| chr16 | 24394907 | 24394907 | + | 0          | 0          | -33.76513716 |
| chr16 | 24394982 | 24394982 | - | 0          | 0          | -41.53832025 |
| chr16 | 24395020 | 24395020 | + | 6.43E-14   | 3.34E-12   | -31.37163561 |
| chr16 | 24395021 | 24395021 | - | 2.42E-14   | 1.31E-12   | -26.11554808 |
| chr16 | 25060278 | 25060278 | - | 1.30E-07   | 3.14E-06   | -30.62068966 |
| chr16 | 29743136 | 29743136 | - | 0          | 0          | -38.03947927 |
| chr16 | 29772916 | 29772916 | + | 3.16E-10   | 1.11E-08   | -26.4052917  |
| chr16 | 29844975 | 29844975 | + | 1.18E-06   | 2.38E-05   | -29.72383721 |
| chr16 | 29876405 | 29876405 | - | 1.80E-12   | 8.09E-11   | -27.49981148 |
| chr16 | 29893936 | 29893936 | + | 0          | 0          | -44.32205612 |
| chr16 | 29893958 | 29893958 | + | 0          | 0          | -35.68322981 |



|       |          |          |   |          |          |              |
|-------|----------|----------|---|----------|----------|--------------|
| chr16 | 29893959 | 29893959 | - | 0        | 0        | -30.00509517 |
| chr16 | 29893974 | 29893974 | + | 0        | 0        | -37.38935728 |
| chr16 | 29893975 | 29893975 | - | 0        | 0        | -40.4748172  |
| chr16 | 29893992 | 29893992 | - | 0        | 0        | -37.90835992 |
| chr16 | 29894003 | 29894003 | - | 0        | 0        | -25.16394391 |
| chr16 | 29996768 | 29996768 | - | 0        | 0        | -32.10616381 |
| chr16 | 30020246 | 30020246 | + | 0        | 0        | -34.375      |
| chr16 | 30020279 | 30020279 | + | 5.73E-13 | 2.71E-11 | -31.95646259 |
| chr16 | 30020280 | 30020280 | - | 1.11E-16 | 7.26E-15 | -27.38404453 |
| chr16 | 30020294 | 30020294 | + | 1.94E-11 | 7.84E-10 | -27.85863349 |
| chr16 | 30020295 | 30020295 | - | 3.59E-11 | 1.41E-09 | -31.2585034  |
| chr16 | 30020298 | 30020298 | + | 0        | 0        | -43.58515142 |
| chr16 | 30020299 | 30020299 | - | 4.30E-11 | 1.67E-09 | -34.76209443 |
| chr16 | 30020310 | 30020310 | - | 5.07E-13 | 2.41E-11 | -32.83586645 |
| chr16 | 30020498 | 30020498 | - | 0        | 0        | -35.12499253 |
| chr16 | 30047769 | 30047769 | + | 0        | 0        | -29.8369433  |
| chr16 | 30047779 | 30047779 | - | 0        | 0        | -25.65667435 |
| chr16 | 30086438 | 30086438 | - | 0        | 0        | -35.98766952 |
| chr16 | 30086470 | 30086470 | - | 0        | 0        | -30.14316838 |
| chr16 | 30120707 | 30120707 | + | 0        | 0        | -42.92033424 |
| chr16 | 30120767 | 30120767 | + | 0        | 0        | -52.05864383 |
| chr16 | 30120768 | 30120768 | - | 0        | 0        | -25.83471074 |
| chr16 | 30120776 | 30120776 | + | 0        | 0        | -48.97564831 |
| chr16 | 30120777 | 30120777 | - | 0        | 0        | -40.03322259 |
| chr16 | 30120786 | 30120786 | + | 0        | 0        | -40.20966948 |
| chr16 | 30120787 | 30120787 | - | 0        | 0        | -39.50473548 |
| chr16 | 30120818 | 30120818 | - | 0        | 0        | -43.72874013 |
| chr16 | 30120964 | 30120964 | - | 0        | 0        | -54.41720463 |
| chr16 | 30120966 | 30120966 | - | 0        | 0        | -47.5400498  |
| chr16 | 30120982 | 30120982 | - | 0        | 0        | -54.46619311 |
| chr16 | 30120994 | 30120994 | - | 0        | 0        | -34.89748217 |
| chr16 | 30121001 | 30121001 | + | 0        | 0        | -39.85505114 |
| chr16 | 30121005 | 30121005 | + | 0        | 0        | -43.35792329 |
| chr16 | 30121015 | 30121015 | + | 0        | 0        | -59.79497445 |
| chr16 | 30121032 | 30121032 | + | 0        | 0        | -51.28469682 |
| chr16 | 30121048 | 30121048 | + | 0        | 0        | -44.97720365 |
| chr16 | 30121049 | 30121049 | - | 0        | 0        | -45.3244061  |
| chr16 | 30121066 | 30121066 | - | 0        | 0        | -43.9188482  |
| chr16 | 30121085 | 30121085 | - | 0        | 0        | -37.26547119 |
| chr16 | 30121088 | 30121088 | - | 0        | 0        | -56.92021222 |
| chr16 | 30122675 | 30122675 | - | 0        | 0        | -42.70568104 |

|       |          |          |   |            |            |              |
|-------|----------|----------|---|------------|------------|--------------|
| chr16 | 30122679 | 30122679 | - | 0          | 0          | -39.07177292 |
| chr16 | 30122688 | 30122688 | - | 0          | 0          | -38.44080814 |
| chr16 | 30122698 | 30122698 | + | 0          | 0          | -31.12950679 |
| chr16 | 30122699 | 30122699 | - | 0          | 0          | -36.0818641  |
| chr16 | 30122727 | 30122727 | - | 0          | 0          | -29.26530077 |
| chr16 | 30122737 | 30122737 | + | 0          | 0          | -26.63223292 |
| chr16 | 30122738 | 30122738 | - | 0          | 0          | -28.1148215  |
| chr16 | 30122761 | 30122761 | - | 0          | 0          | -29.91373682 |
| chr16 | 30129431 | 30129431 | + | 0          | 0          | -27.31617961 |
| chr16 | 30129522 | 30129522 | + | 0          | 0          | -26.94221982 |
| chr16 | 30186639 | 30186639 | - | 0          | 0          | -25.52700922 |
| chr16 | 30186641 | 30186641 | - | 0          | 0          | -26.40163639 |
| chr16 | 30206006 | 30206006 | + | 0          | 0          | -28.81440342 |
| chr16 | 30206007 | 30206007 | - | 0          | 0          | -28.97612208 |
| chr16 | 30206223 | 30206223 | - | 0          | 0          | -40.55433747 |
| chr16 | 30206485 | 30206485 | - | 5.46E-14   | 2.85E-12   | -30.28221778 |
| chr16 | 30242772 | 30242772 | + | 0          | 0          | -38.10390752 |
| chr16 | 30281123 | 30281123 | - | 0          | 0          | -30.45244411 |
| chr16 | 30397289 | 30397289 | + | 0          | 0          | -34.3615093  |
| chr16 | 30655757 | 30655757 | + | 0          | 0          | -25.35610385 |
| chr16 | 30821503 | 30821503 | - | 1.70E-05   | 0.00026531 | -35.34735812 |
| chr16 | 30870272 | 30870272 | - | 2.89E-12   | 1.27E-10   | -31.83743445 |
| chr16 | 30873508 | 30873508 | + | 5.44E-15   | 3.12E-13   | -25.46809019 |
| chr16 | 30874036 | 30874036 | + | 0          | 0          | -28.3918181  |
| chr16 | 30874048 | 30874048 | + | 0          | 0          | -31.08345369 |
| chr16 | 30874058 | 30874058 | + | 0          | 0          | -26.78757537 |
| chr16 | 30874077 | 30874077 | + | 0          | 0          | -32.25828962 |
| chr16 | 30874082 | 30874082 | + | 0          | 0          | -28.73844373 |
| chr16 | 31354516 | 31354516 | + | 0.00109751 | 0.00952712 | -30.13986014 |
| chr16 | 31354536 | 31354536 | + | 2.36E-08   | 6.41E-07   | -46.86792453 |
| chr16 | 31493171 | 31493171 | - | 9.87E-05   | 0.00124674 | -28.81458233 |
| chr16 | 31508359 | 31508359 | + | 0          | 0          | -43.32315197 |
| chr16 | 31508371 | 31508371 | + | 0          | 0          | -35.84212739 |
| chr16 | 31590006 | 31590006 | - | 2.93E-06   | 5.48E-05   | -27.96760711 |
| chr16 | 31618014 | 31618014 | + | 0          | 0          | -30.58435084 |
| chr16 | 31618038 | 31618038 | + | 0          | 0          | -27.16861074 |
| chr16 | 31618167 | 31618167 | - | 0          | 0          | -25.02315422 |
| chr16 | 31918285 | 31918285 | + | 0          | 0          | -25.56085272 |
| chr16 | 31918286 | 31918286 | - | 0          | 0          | -32.29090017 |
| chr16 | 31925215 | 31925215 | + | 0.00039648 | 0.00409437 | -25.53191489 |
| chr16 | 32187035 | 32187035 | + | 0          | 0          | -35.65134556 |

|       |          |          |   |            |            |              |
|-------|----------|----------|---|------------|------------|--------------|
| chr16 | 32187104 | 32187104 | - | 0          | 0          | -27.73167358 |
| chr16 | 32715238 | 32715238 | + | 0.00032597 | 0.0034728  | -27.84123358 |
| chr16 | 33061535 | 33061535 | + | 4.45E-09   | 1.34E-07   | -30.84974643 |
| chr16 | 33061579 | 33061579 | + | 1.01E-08   | 2.89E-07   | -29.10971443 |
| chr16 | 33061580 | 33061580 | - | 1.03E-08   | 2.94E-07   | -25.13720198 |
| chr16 | 33303650 | 33303650 | + | 0          | 0          | -29.42752302 |
| chr16 | 33529712 | 33529712 | + | 0          | 0          | -28.51731249 |
| chr16 | 33529843 | 33529843 | + | 1.13E-10   | 4.19E-09   | -28.57281679 |
| chr16 | 33529888 | 33529888 | + | 4.05E-11   | 1.58E-09   | -28.88289432 |
| chr16 | 33834389 | 33834389 | + | 0          | 0          | -30.28935778 |
| chr16 | 33834419 | 33834419 | + | 0          | 0          | -37.31000034 |
| chr16 | 33834420 | 33834420 | - | 0          | 0          | -38.28847114 |
| chr16 | 34666427 | 34666427 | + | 0.00022647 | 0.0025476  | -34.61538462 |
| chr16 | 34836968 | 34836968 | + | 5.30E-10   | 1.81E-08   | -25.29221305 |
| chr16 | 34847911 | 34847911 | + | 3.83E-09   | 1.17E-07   | -31.77394035 |
| chr16 | 35156277 | 35156277 | + | 1.00E-11   | 4.17E-10   | -25.63396516 |
| chr16 | 35425524 | 35425524 | + | 7.97E-13   | 3.71E-11   | -27.32795358 |
| chr16 | 35425650 | 35425650 | + | 1.07E-12   | 4.93E-11   | -39.95820272 |
| chr16 | 35425651 | 35425651 | - | 5.95E-09   | 1.77E-07   | -27.91961246 |
| chr16 | 35630766 | 35630766 | + | 0.00089476 | 0.00806117 | 26.08695652  |
| chr16 | 35631050 | 35631050 | + | 2.56E-05   | 0.00038272 | -35.61403509 |
| chr16 | 35659783 | 35659783 | + | 6.98E-09   | 2.05E-07   | 33.70518688  |
| chr16 | 35818479 | 35818479 | + | 0          | 0          | -44.8697174  |
| chr16 | 35818508 | 35818508 | + | 0          | 0          | -36.79821367 |
| chr16 | 35873083 | 35873083 | + | 0.00038982 | 0.00403673 | -26.75480769 |
| chr16 | 36709566 | 36709566 | - | 5.51E-10   | 1.88E-08   | -25.1459647  |
| chr16 | 36709602 | 36709602 | - | 4.51E-11   | 1.75E-09   | -26.83983666 |
| chr16 | 36723011 | 36723011 | + | 0          | 0          | -27.36844619 |
| chr16 | 37683453 | 37683453 | + | 2.88E-07   | 6.55E-06   | -25.66484729 |
| chr16 | 37683712 | 37683712 | - | 9.83E-05   | 0.00124232 | -39.47990544 |
| chr16 | 37854615 | 37854615 | + | 2.53E-09   | 7.90E-08   | -34.60519343 |
| chr16 | 38334644 | 38334644 | + | 1.04E-05   | 0.00017144 | -26.67525773 |
| chr16 | 38431974 | 38431974 | + | 0          | 0          | -31.80820852 |
| chr16 | 38432081 | 38432081 | + | 5.48E-10   | 1.87E-08   | -25.0205679  |
| chr16 | 38432082 | 38432082 | - | 0          | 0          | -26.88075918 |
| chr16 | 38521720 | 38521720 | - | 7.46E-08   | 1.87E-06   | -27.75823071 |
| chr16 | 38636848 | 38636848 | + | 1.09E-11   | 4.53E-10   | -30.69349778 |
| chr16 | 38636918 | 38636918 | - | 0          | 0          | -26.13780672 |
| chr16 | 38636946 | 38636946 | + | 3.37E-08   | 8.93E-07   | -26.00644122 |
| chr16 | 41122875 | 41122875 | - | 0.00071682 | 0.00671218 | -25.29274005 |
| chr16 | 43573411 | 43573411 | - | 0          | 0          | -27.69274327 |

|       |          |          |   |            |            |              |
|-------|----------|----------|---|------------|------------|--------------|
| chr16 | 43974028 | 43974028 | + | 0          | 0          | -29.51131635 |
| chr16 | 44118639 | 44118639 | + | 0          | 0          | -40.53962028 |
| chr16 | 44118663 | 44118663 | + | 0          | 0          | -40.32050375 |
| chr16 | 44118794 | 44118794 | - | 3.45E-05   | 0.00049776 | -28.66422385 |
| chr16 | 44531163 | 44531163 | - | 0          | 0          | -27.4935189  |
| chr16 | 44531434 | 44531434 | + | 8.29E-05   | 0.00107188 | -40.30172414 |
| chr16 | 44531444 | 44531444 | + | 0.00072998 | 0.00681358 | -27.27272727 |
| chr16 | 44531451 | 44531451 | + | 0.00025989 | 0.00286635 | -28.125      |
| chr16 | 44671359 | 44671359 | + | 0          | 0          | -30.11186714 |
| chr16 | 44671400 | 44671400 | - | 0          | 0          | -47.9911901  |
| chr16 | 46109789 | 46109789 | + | 0          | 0          | -27.27761005 |
| chr16 | 48750389 | 48750389 | + | 0          | 0          | -34.00948176 |
| chr16 | 48750403 | 48750403 | + | 0          | 0          | -34.03558137 |
| chr16 | 48750410 | 48750410 | + | 0          | 0          | -25.8917622  |
| chr16 | 49910500 | 49910500 | - | 0          | 0          | -35.26957638 |
| chr16 | 50530634 | 50530634 | - | 6.07E-06   | 0.00010569 | -26.32569278 |
| chr16 | 51110507 | 51110507 | + | 0.00040098 | 0.00413323 | 30.43478261  |
| chr16 | 57391517 | 57391517 | - | 3.84E-05   | 0.00054644 | 53.04232804  |
| chr16 | 62873245 | 62873245 | + | 2.23E-11   | 8.95E-10   | -27.16559291 |
| chr16 | 63817399 | 63817399 | - | 9.44E-09   | 2.72E-07   | -28.32167832 |
| chr16 | 72158446 | 72158446 | + | 0.00012272 | 0.00150466 | -34.61538462 |
| chr16 | 76339527 | 76339527 | + | 1.53E-05   | 0.00024222 | -27.45255474 |
| chr16 | 76540075 | 76540075 | - | 0          | 0          | -29.94754781 |
| chr16 | 82883364 | 82883364 | + | 7.60E-05   | 0.00099388 | 25.05555556  |
| chr16 | 84825053 | 84825053 | + | 4.66E-15   | 2.69E-13   | -27.72397609 |
| chr16 | 87665560 | 87665560 | + | 0          | 0          | -27.84503837 |
| chr16 | 87721984 | 87721984 | + | 0.0001073  | 0.00133977 | 33.33333333  |
| chr16 | 87784787 | 87784787 | - | 2.02E-08   | 5.56E-07   | -26.8907563  |
| chr16 | 89817349 | 89817349 | + | 4.19E-12   | 1.81E-10   | -33.07620383 |
| chr16 | 89817551 | 89817551 | - | 1.96E-09   | 6.20E-08   | -26.95985401 |
| chr16 | 89943569 | 89943569 | + | 0          | 0          | -31.51927438 |
| chr16 | 89943598 | 89943598 | - | 0          | 0          | -29.79270079 |
| chr16 | 89945517 | 89945517 | - | 0          | 0          | -33.41207091 |
| chr16 | 89974086 | 89974086 | - | 0          | 0          | -35.13223366 |
| chr16 | 89974093 | 89974093 | - | 0          | 0          | -32.6087531  |
| chr16 | 90291029 | 90291029 | + | 0          | 0          | -25.17159932 |
| chr16 | 90453453 | 90453453 | - | 6.59E-05   | 0.00087862 | -43.82647386 |
| chr16 | 90453466 | 90453466 | - | 0.00034431 | 0.00363698 | -35.37263626 |
| chr16 | 90453475 | 90453475 | - | 1.83E-06   | 3.57E-05   | -49.23887588 |
| chr16 | 90521144 | 90521144 | + | 0          | 0          | -25.35063114 |
| chr16 | 90521155 | 90521155 | + | 0          | 0          | -26.54442358 |

|       |          |          |   |            |            |              |
|-------|----------|----------|---|------------|------------|--------------|
| chr16 | 90628996 | 90628996 | - | 9.06E-14   | 4.64E-12   | -37.69323671 |
| chr16 | 90629375 | 90629375 | - | 0.00069749 | 0.0065613  | -26.58227848 |
| chr16 | 90629403 | 90629403 | + | 0          | 0          | -26.31316937 |
| chr16 | 90629421 | 90629421 | + | 0          | 0          | -25.25426748 |
| chr16 | 90629423 | 90629423 | + | 0          | 0          | -25.18885166 |
| chr16 | 90876277 | 90876277 | - | 0.00016066 | 0.00189911 | -29.32416953 |
| chr16 | 91069152 | 91069152 | + | 0          | 0          | -28.56850308 |
| chr16 | 91140602 | 91140602 | + | 0          | 0          | -29.16937846 |
| chr16 | 91175919 | 91175919 | - | 1.51E-05   | 0.00023924 | -36.17283951 |
| chr16 | 91229236 | 91229236 | - | 0          | 0          | -31.85942244 |
| chr16 | 91268443 | 91268443 | + | 6.99E-06   | 0.00011989 | -27.61940485 |
| chr16 | 91303933 | 91303933 | + | 0          | 0          | -29.45650858 |
| chr16 | 91303964 | 91303964 | + | 0          | 0          | -37.62097047 |
| chr16 | 91304010 | 91304010 | - | 0          | 0          | -26.53726248 |
| chr16 | 91304052 | 91304052 | + | 4.51E-06   | 8.09E-05   | -44.36363636 |
| chr16 | 91304300 | 91304300 | + | 1.41E-08   | 3.95E-07   | -31.52079454 |
| chr16 | 91304301 | 91304301 | - | 4.48E-06   | 8.04E-05   | -29.66008772 |
| chr16 | 91304319 | 91304319 | + | 1.91E-12   | 8.55E-11   | -38.61338469 |
| chr16 | 91304329 | 91304329 | + | 0          | 0          | -48.02218416 |
| chr16 | 91310597 | 91310597 | - | 0          | 0          | -29.90860996 |
| chr16 | 91310606 | 91310606 | + | 2.22E-16   | 1.43E-14   | -28.43944608 |
| chr16 | 91310646 | 91310646 | + | 0.00074407 | 0.0069219  | -36          |
| chr16 | 91320458 | 91320458 | - | 2.33E-15   | 1.38E-13   | -41.98819313 |
| chr16 | 91320469 | 91320469 | + | 0          | 0          | -26.39958911 |
| chr16 | 91320625 | 91320625 | - | 0          | 0          | -33.13986874 |
| chr16 | 91334696 | 91334696 | - | 0          | 0          | -28.82517483 |
| chr16 | 91885522 | 91885522 | - | 5.25E-08   | 1.35E-06   | -35.18504784 |
| chr16 | 92001055 | 92001055 | + | 0.00044327 | 0.00449551 | -37.5331565  |
| chr16 | 92164137 | 92164137 | + | 2.62E-06   | 4.95E-05   | -38.69485294 |
| chr16 | 92359432 | 92359432 | + | 5.99E-08   | 1.53E-06   | -27.71428571 |
| chr16 | 92412356 | 92412356 | + | 0          | 0          | -27.12905452 |
| chr16 | 92412360 | 92412360 | + | 0          | 0          | -28.6674699  |
| chr16 | 92412464 | 92412464 | - | 0          | 0          | -33.54922457 |
| chr16 | 92412468 | 92412468 | - | 0          | 0          | -25.42939127 |
| chr16 | 92425970 | 92425970 | + | 5.55E-16   | 3.46E-14   | -25.27701656 |
| chr16 | 92428429 | 92428429 | + | 1.13E-14   | 6.30E-13   | -28.81464414 |
| chr16 | 92428446 | 92428446 | - | 0          | 0          | -27.62892538 |
| chr16 | 92695675 | 92695675 | + | 0          | 0          | -25.71778711 |
| chr16 | 92695676 | 92695676 | - | 0          | 0          | -29.61810568 |
| chr16 | 92695687 | 92695687 | + | 0          | 0          | -28.31054446 |
| chr16 | 92695688 | 92695688 | - | 0          | 0          | -43.05108871 |

|       |          |          |   |            |            |              |
|-------|----------|----------|---|------------|------------|--------------|
| chr16 | 92695697 | 92695697 | + | 0          | 0          | -51.46433319 |
| chr16 | 92695699 | 92695699 | + | 0          | 0          | -40.62176931 |
| chr16 | 92695709 | 92695709 | + | 0          | 0          | -32.5391147  |
| chr16 | 92695719 | 92695719 | + | 0          | 0          | -36.34602333 |
| chr16 | 92695722 | 92695722 | + | 0          | 0          | -34.90536881 |
| chr16 | 92695727 | 92695727 | + | 0          | 0          | -44.53259005 |
| chr16 | 92695802 | 92695802 | - | 0          | 0          | -40.76339423 |
| chr16 | 92695805 | 92695805 | - | 0          | 0          | -25.36012813 |
| chr16 | 92695837 | 92695837 | + | 0          | 0          | -26.42962594 |
| chr16 | 92695838 | 92695838 | - | 0          | 0          | -26.40747324 |
| chr16 | 92695943 | 92695943 | + | 0          | 0          | -40.12281882 |
| chr16 | 92696075 | 92696075 | - | 0          | 0          | -41.19657779 |
| chr16 | 92698986 | 92698986 | - | 7.23E-13   | 3.39E-11   | -26.19971483 |
| chr16 | 92699007 | 92699007 | + | 0.00020213 | 0.00231238 | -27.14987715 |
| chr16 | 92699033 | 92699033 | - | 8.37E-05   | 0.00108056 | -26.29811418 |
| chr16 | 92699268 | 92699268 | - | 5.44E-13   | 2.58E-11   | -32.1996619  |
| chr16 | 92699282 | 92699282 | - | 2.11E-11   | 8.48E-10   | -26.36386658 |
| chr16 | 92699669 | 92699669 | + | 1.94E-14   | 1.06E-12   | -32.04148109 |
| chr16 | 92699829 | 92699829 | - | 0          | 0          | -60.48315603 |
| chr16 | 92699836 | 92699836 | - | 0          | 0          | -58.77014665 |
| chr16 | 92699853 | 92699853 | - | 0          | 0          | -54.43010598 |
| chr16 | 92699871 | 92699871 | - | 1.11E-16   | 7.26E-15   | -44.71759821 |
| chr16 | 93006571 | 93006571 | + | 0          | 0          | -38.05513744 |
| chr16 | 93006624 | 93006624 | + | 5.22E-15   | 3.00E-13   | -30.41643735 |
| chr16 | 93006625 | 93006625 | - | 0          | 0          | -35.77078995 |
| chr16 | 93006656 | 93006656 | + | 0          | 0          | -37.71269177 |
| chr16 | 93006714 | 93006714 | - | 0          | 0          | -48.250803   |
| chr16 | 93006718 | 93006718 | - | 0          | 0          | -46.77393066 |
| chr16 | 93006722 | 93006722 | - | 0          | 0          | -35.39893617 |
| chr16 | 93006758 | 93006758 | - | 0          | 0          | -36.09302575 |
| chr16 | 93438231 | 93438231 | - | 5.97E-07   | 1.28E-05   | -26.13502441 |
| chr16 | 93574321 | 93574321 | + | 0.00054087 | 0.00531335 | -44.47058824 |
| chr16 | 93574326 | 93574326 | + | 1.53E-07   | 3.66E-06   | -59.55882353 |
| chr16 | 94011157 | 94011157 | - | 2.19E-05   | 0.00033281 | -32.59379509 |
| chr16 | 94011173 | 94011173 | - | 0.0003438  | 0.0036325  | -28.38888889 |
| chr16 | 94718374 | 94718374 | - | 0.00020348 | 0.00232541 | 31.03448276  |
| chr16 | 95257734 | 95257734 | - | 0          | 0          | -28.60036571 |
| chr16 | 95343298 | 95343298 | + | 6.25E-06   | 0.00010845 | -48.27586207 |
| chr16 | 95349492 | 95349492 | - | 1.41E-06   | 2.81E-05   | -30.35714286 |
| chr16 | 95550481 | 95550481 | + | 1.11E-16   | 7.26E-15   | -25.49734748 |
| chr16 | 95612320 | 95612320 | + | 1.40E-08   | 3.94E-07   | -25.82803613 |

|       |          |          |   |            |            |              |
|-------|----------|----------|---|------------|------------|--------------|
| chr16 | 95638025 | 95638025 | - | 6.49E-07   | 1.38E-05   | -35.97938144 |
| chr16 | 95832491 | 95832491 | + | 4.14E-09   | 1.25E-07   | -29.0379972  |
| chr16 | 96158737 | 96158737 | + | 0          | 0          | -32.90699031 |
| chr16 | 96200834 | 96200834 | + | 3.49E-13   | 1.69E-11   | -25.56776557 |
| chr16 | 97611726 | 97611726 | + | 3.75E-10   | 1.30E-08   | -30.43627619 |
| chr17 | 3055107  | 3055107  | + | 0          | 0          | -25.5159868  |
| chr17 | 3082310  | 3082310  | + | 1.29E-05   | 0.00020815 | -41.96332255 |
| chr17 | 3516661  | 3516661  | + | 0          | 0          | -31.22837889 |
| chr17 | 3516662  | 3516662  | - | 0          | 0          | -25.49810727 |
| chr17 | 4434597  | 4434597  | - | 1.40E-05   | 0.0002242  | -42.10526316 |
| chr17 | 4988723  | 4988723  | + | 4.08E-06   | 7.38E-05   | -25.53485162 |
| chr17 | 5134496  | 5134496  | - | 6.92E-05   | 0.00091648 | -28.94736842 |
| chr17 | 5278682  | 5278682  | - | 0.00081308 | 0.00744893 | -25.92592593 |
| chr17 | 6744589  | 6744589  | + | 1.65E-10   | 5.98E-09   | -29.85911148 |
| chr17 | 6864828  | 6864828  | + | 0          | 0          | -26.25073847 |
| chr17 | 6864834  | 6864834  | + | 0          | 0          | -43.14607543 |
| chr17 | 6864851  | 6864851  | + | 0          | 0          | -31.59097987 |
| chr17 | 6864937  | 6864937  | + | 0          | 0          | -30.11463325 |
| chr17 | 6864992  | 6864992  | + | 0          | 0          | -37.96195323 |
| chr17 | 6864993  | 6864993  | - | 0          | 0          | -34.98405137 |
| chr17 | 6865015  | 6865015  | + | 0          | 0          | -35.22002592 |
| chr17 | 6865036  | 6865036  | + | 0          | 0          | -40.25089785 |
| chr17 | 6865095  | 6865095  | - | 0          | 0          | -25.39156615 |
| chr17 | 6865115  | 6865115  | - | 0          | 0          | -26.04034619 |
| chr17 | 6865169  | 6865169  | - | 0          | 0          | -32.10017798 |
| chr17 | 7229363  | 7229363  | - | 0          | 0          | -26.71077252 |
| chr17 | 7642572  | 7642572  | - | 3.05E-05   | 0.0004463  | -37.47508306 |
| chr17 | 7871975  | 7871975  | + | 0          | 0          | -26.20512821 |
| chr17 | 7872003  | 7872003  | - | 0          | 0          | -31.77740864 |
| chr17 | 7872005  | 7872005  | - | 0          | 0          | -29.44619929 |
| chr17 | 7876194  | 7876194  | + | 4.41E-06   | 7.92E-05   | -27.44610282 |
| chr17 | 8368160  | 8368160  | + | 0          | 0          | -36.84273304 |
| chr17 | 8368199  | 8368199  | + | 1.59E-12   | 7.20E-11   | -31.74881107 |
| chr17 | 8406091  | 8406091  | + | 1.07E-10   | 3.97E-09   | -25.85525777 |
| chr17 | 8406224  | 8406224  | - | 0          | 0          | -25.63268803 |
| chr17 | 8406234  | 8406234  | - | 0          | 0          | -35.06618326 |
| chr17 | 8435177  | 8435177  | - | 0          | 0          | -25.79663679 |
| chr17 | 10038132 | 10038132 | + | 0.00013922 | 0.00167825 | -28.51971558 |
| chr17 | 10441916 | 10441916 | + | 0          | 0          | -25.5694499  |
| chr17 | 10776863 | 10776863 | + | 7.87E-09   | 2.29E-07   | -41.90924658 |
| chr17 | 11225729 | 11225729 | - | 0.00018033 | 0.00209748 | -30.42091837 |

|       |          |          |   |            |            |              |
|-------|----------|----------|---|------------|------------|--------------|
| chr17 | 11681187 | 11681187 | - | 0          | 0          | -31.48698022 |
| chr17 | 11962127 | 11962127 | + | 0          | 0          | -32.77265664 |
| chr17 | 11962128 | 11962128 | - | 0          | 0          | -29.4427399  |
| chr17 | 12044707 | 12044707 | - | 0          | 0          | -26.0420213  |
| chr17 | 12271907 | 12271907 | - | 2.44E-06   | 4.64E-05   | 48.14814815  |
| chr17 | 12507781 | 12507781 | - | 4.22E-12   | 1.83E-10   | -34.11074546 |
| chr17 | 12507817 | 12507817 | + | 0          | 0          | -30.83524048 |
| chr17 | 12507949 | 12507949 | + | 1.11E-16   | 7.26E-15   | -26.26181444 |
| chr17 | 12507950 | 12507950 | - | 0          | 0          | -28.48157707 |
| chr17 | 12507959 | 12507959 | + | 0          | 0          | -34.40553645 |
| chr17 | 12508047 | 12508047 | - | 0          | 0          | -35.2510209  |
| chr17 | 12508059 | 12508059 | + | 0          | 0          | -30.10654886 |
| chr17 | 12508060 | 12508060 | - | 0          | 0          | -32.85757408 |
| chr17 | 12790644 | 12790644 | + | 1.71E-13   | 8.53E-12   | -41.54748477 |
| chr17 | 13364482 | 13364482 | + | 0.00017496 | 0.00204371 | 25.71428571  |
| chr17 | 13471011 | 13471011 | + | 2.31E-08   | 6.30E-07   | -48.38709677 |
| chr17 | 13656481 | 13656481 | + | 0          | 0          | -37.59643936 |
| chr17 | 13656510 | 13656510 | + | 0          | 0          | -37.38747315 |
| chr17 | 15108925 | 15108925 | + | 1.36E-08   | 3.82E-07   | -29.01234568 |
| chr17 | 15195347 | 15195347 | + | 5.10E-12   | 2.19E-10   | -26.36268344 |
| chr17 | 15381940 | 15381940 | - | 8.19E-07   | 1.71E-05   | -26.28546099 |
| chr17 | 17830844 | 17830844 | + | 0.00014287 | 0.00171633 | -29.99403697 |
| chr17 | 17837651 | 17837651 | + | 0          | 0          | -25.16026342 |
| chr17 | 23540793 | 23540793 | + | 0          | 0          | -36.51847176 |
| chr17 | 23540830 | 23540830 | + | 0          | 0          | -32.84705882 |
| chr17 | 23540920 | 23540920 | - | 3.53E-06   | 6.48E-05   | -29.84307359 |
| chr17 | 23540943 | 23540943 | - | 7.22E-05   | 0.00095005 | -30.17826825 |
| chr17 | 23540948 | 23540948 | - | 8.98E-05   | 0.00114836 | -25.93201754 |
| chr17 | 23540954 | 23540954 | - | 7.53E-10   | 2.52E-08   | -46.15800866 |
| chr17 | 23743811 | 23743811 | - | 0          | 0          | -28.92847108 |
| chr17 | 23743919 | 23743919 | + | 8.88E-15   | 4.99E-13   | -37.47087944 |
| chr17 | 23743920 | 23743920 | - | 0          | 0          | -26.32810054 |
| chr17 | 23745246 | 23745246 | + | 0.00022217 | 0.00250605 | -26.42857143 |
| chr17 | 23746622 | 23746622 | + | 1.52E-10   | 5.54E-09   | -28.57142857 |
| chr17 | 24063685 | 24063685 | + | 0.00043355 | 0.00441191 | -32.37179487 |
| chr17 | 24207177 | 24207177 | - | 0.00032    | 0.00341949 | -26.24911201 |
| chr17 | 24208766 | 24208766 | + | 0          | 0          | -26.39473632 |
| chr17 | 24544663 | 24544663 | - | 0          | 0          | -25.81518177 |
| chr17 | 24544704 | 24544704 | + | 0          | 0          | -34.82567003 |
| chr17 | 24544705 | 24544705 | - | 0          | 0          | -28.51307432 |
| chr17 | 24544758 | 24544758 | + | 1.57E-09   | 5.04E-08   | -42.68565941 |



|       |          |          |   |            |            |              |
|-------|----------|----------|---|------------|------------|--------------|
| chr17 | 24544759 | 24544759 | - | 0          | 0          | -26.43785521 |
| chr17 | 24545020 | 24545020 | - | 2.59E-08   | 7.00E-07   | -60.04901961 |
| chr17 | 24545054 | 24545054 | - | 0.00058757 | 0.00569236 | -28.24754902 |
| chr17 | 24667740 | 24667740 | - | 7.53E-07   | 1.59E-05   | -31.11111111 |
| chr17 | 24679071 | 24679071 | + | 0          | 0          | -28.38274984 |
| chr17 | 24679122 | 24679122 | + | 0          | 0          | -41.91421569 |
| chr17 | 24679123 | 24679123 | - | 0          | 0          | -41.22500683 |
| chr17 | 24679157 | 24679157 | + | 0          | 0          | -38.96728484 |
| chr17 | 24679158 | 24679158 | - | 0          | 0          | -33.2250186  |
| chr17 | 24679183 | 24679183 | - | 0          | 0          | -27.40746429 |
| chr17 | 24679192 | 24679192 | - | 0          | 0          | -38.06567481 |
| chr17 | 24737181 | 24737181 | - | 3.53E-05   | 0.00050724 | -44.89795918 |
| chr17 | 24882131 | 24882131 | - | 9.73E-07   | 2.01E-05   | -27.81114798 |
| chr17 | 25082265 | 25082265 | - | 0          | 0          | -30.539658   |
| chr17 | 25566493 | 25566493 | - | 6.05E-08   | 1.54E-06   | -25.03477324 |
| chr17 | 26067704 | 26067704 | + | 0          | 0          | -28.94139388 |
| chr17 | 26067710 | 26067710 | + | 0          | 0          | -33.28358209 |
| chr17 | 26067711 | 26067711 | - | 0          | 0          | -28.96085507 |
| chr17 | 26067753 | 26067753 | - | 0          | 0          | -25.743919   |
| chr17 | 26067773 | 26067773 | + | 0          | 0          | -35.54383848 |
| chr17 | 26067776 | 26067776 | + | 0          | 0          | -41.15691264 |
| chr17 | 26067782 | 26067782 | + | 0          | 0          | -40.1944543  |
| chr17 | 26067811 | 26067811 | - | 0          | 0          | -27.81679997 |
| chr17 | 26067851 | 26067851 | - | 0          | 0          | -26.98634552 |
| chr17 | 26067888 | 26067888 | + | 0          | 0          | -31.67000706 |
| chr17 | 26067956 | 26067956 | - | 0          | 0          | -38.91390735 |
| chr17 | 26067975 | 26067975 | + | 0          | 0          | -40.19107931 |
| chr17 | 26067976 | 26067976 | - | 0          | 0          | -41.0298077  |
| chr17 | 26068026 | 26068026 | - | 0          | 0          | -28.16410315 |
| chr17 | 26068032 | 26068032 | - | 0          | 0          | -40.13620149 |
| chr17 | 26068075 | 26068075 | - | 0          | 0          | -25.14897476 |
| chr17 | 26245044 | 26245044 | - | 7.08E-06   | 0.00012136 | -31.92109096 |
| chr17 | 26433548 | 26433548 | + | 0          | 0          | -40.01941491 |
| chr17 | 26433600 | 26433600 | - | 0          | 0          | -42.28346743 |
| chr17 | 26439051 | 26439051 | + | 0          | 0          | -50.15595463 |
| chr17 | 26439060 | 26439060 | + | 0          | 0          | -46.7122298  |
| chr17 | 26439067 | 26439067 | + | 0          | 0          | -33.25533493 |
| chr17 | 26439069 | 26439069 | + | 0          | 0          | -56.5685302  |
| chr17 | 26439082 | 26439082 | + | 0          | 0          | -44.8246804  |
| chr17 | 26439090 | 26439090 | + | 0          | 0          | -46.94884652 |
| chr17 | 26439097 | 26439097 | + | 0          | 0          | -48.74103972 |

|       |          |          |   |            |            |              |
|-------|----------|----------|---|------------|------------|--------------|
| chr17 | 26439145 | 26439145 | - | 0          | 0          | -47.55769063 |
| chr17 | 26439156 | 26439156 | - | 0          | 0          | -43.89725831 |
| chr17 | 26439180 | 26439180 | - | 0          | 0          | -52.75070651 |
| chr17 | 26439182 | 26439182 | - | 0          | 0          | -43.7229967  |
| chr17 | 26439184 | 26439184 | + | 0          | 0          | -53.97264033 |
| chr17 | 26439185 | 26439185 | - | 0          | 0          | -33.09641115 |
| chr17 | 26439190 | 26439190 | + | 0          | 0          | -53.87445057 |
| chr17 | 26439191 | 26439191 | - | 0          | 0          | -47.60886379 |
| chr17 | 26439199 | 26439199 | + | 0          | 0          | -44.43769984 |
| chr17 | 26439200 | 26439200 | - | 0          | 0          | -43.06150209 |
| chr17 | 26439205 | 26439205 | + | 0          | 0          | -46.43791832 |
| chr17 | 26439206 | 26439206 | - | 0          | 0          | -41.99138859 |
| chr17 | 26439208 | 26439208 | + | 0          | 0          | -46.58899021 |
| chr17 | 26439209 | 26439209 | - | 0          | 0          | -43.70593312 |
| chr17 | 26439210 | 26439210 | + | 0          | 0          | -50.64180962 |
| chr17 | 26439211 | 26439211 | - | 0          | 0          | -49.97652949 |
| chr17 | 26439222 | 26439222 | + | 0          | 0          | -50.96995962 |
| chr17 | 26439223 | 26439223 | - | 0          | 0          | -49.91779935 |
| chr17 | 26439227 | 26439227 | + | 0          | 0          | -55.74481431 |
| chr17 | 26439228 | 26439228 | - | 0          | 0          | -57.12176284 |
| chr17 | 26439232 | 26439232 | + | 0          | 0          | -35.17405504 |
| chr17 | 26439233 | 26439233 | - | 0          | 0          | -47.58366636 |
| chr17 | 26439235 | 26439235 | + | 0          | 0          | -47.64144311 |
| chr17 | 26439238 | 26439238 | + | 0          | 0          | -55.11006744 |
| chr17 | 26439241 | 26439241 | + | 0          | 0          | -56.44113348 |
| chr17 | 26439252 | 26439252 | + | 0          | 0          | -53.44502455 |
| chr17 | 26439259 | 26439259 | + | 0          | 0          | -57.2946997  |
| chr17 | 26439263 | 26439263 | + | 0          | 0          | -44.42239982 |
| chr17 | 26439267 | 26439267 | + | 0          | 0          | -58.13964087 |
| chr17 | 26439269 | 26439269 | + | 0          | 0          | -37.62847754 |
| chr17 | 26439275 | 26439275 | + | 0          | 0          | -52.12107592 |
| chr17 | 26439327 | 26439327 | - | 0          | 0          | -37.72264447 |
| chr17 | 26439329 | 26439329 | - | 0          | 0          | -34.19563153 |
| chr17 | 26464653 | 26464653 | - | 0          | 0          | -25.04214465 |
| chr17 | 26506393 | 26506393 | - | 4.14E-14   | 2.19E-12   | -29.91844543 |
| chr17 | 26663754 | 26663754 | + | 1.67E-06   | 3.28E-05   | -57.14285714 |
| chr17 | 26931918 | 26931918 | - | 0          | 0          | -28.4871078  |
| chr17 | 26949278 | 26949278 | - | 0.00011712 | 0.00144481 | -41.18625277 |
| chr17 | 26949322 | 26949322 | - | 2.09E-06   | 4.03E-05   | -36.942959   |
| chr17 | 26952391 | 26952391 | + | 0          | 0          | -28.81242741 |
| chr17 | 26952403 | 26952403 | + | 0          | 0          | -28.90778634 |

|       |          |          |   |            |            |              |
|-------|----------|----------|---|------------|------------|--------------|
| chr17 | 26953069 | 26953069 | + | 0          | 0          | -28.54315875 |
| chr17 | 26953070 | 26953070 | - | 0          | 0          | -33.16838947 |
| chr17 | 26953096 | 26953096 | + | 0          | 0          | -31.28742395 |
| chr17 | 26953097 | 26953097 | - | 0          | 0          | -29.00849473 |
| chr17 | 26953111 | 26953111 | + | 0          | 0          | -37.77021956 |
| chr17 | 26953112 | 26953112 | - | 0          | 0          | -38.15309047 |
| chr17 | 26953904 | 26953904 | + | 1.15E-07   | 2.79E-06   | -60.01589825 |
| chr17 | 26954065 | 26954065 | - | 0          | 0          | -28.46961789 |
| chr17 | 27036823 | 27036823 | - | 0          | 0          | -37.84281621 |
| chr17 | 27038415 | 27038415 | + | 0          | 0          | -39.34946332 |
| chr17 | 27038594 | 27038594 | + | 1.47E-10   | 5.37E-09   | -38.31002331 |
| chr17 | 27038608 | 27038608 | + | 1.38E-09   | 4.48E-08   | -36.23371406 |
| chr17 | 27038614 | 27038614 | + | 6.52E-06   | 0.00011269 | -27.69230769 |
| chr17 | 27038820 | 27038820 | + | 2.13E-08   | 5.83E-07   | -30.14182939 |
| chr17 | 27038833 | 27038833 | + | 5.53E-14   | 2.89E-12   | -44.67086835 |
| chr17 | 27038858 | 27038858 | + | 2.55E-09   | 7.96E-08   | -37.91666667 |
| chr17 | 27040387 | 27040387 | + | 0          | 0          | -30.38976339 |
| chr17 | 27040413 | 27040413 | + | 0          | 0          | -34.88396307 |
| chr17 | 27040417 | 27040417 | + | 0          | 0          | -33.3531948  |
| chr17 | 27041097 | 27041097 | + | 5.41E-05   | 0.00073897 | -26.60455487 |
| chr17 | 27041283 | 27041283 | - | 0.00048861 | 0.00488    | -26.03448276 |
| chr17 | 27048648 | 27048648 | + | 2.02E-13   | 9.99E-12   | -32.34460722 |
| chr17 | 27048659 | 27048659 | + | 1.22E-14   | 6.77E-13   | -33.36032389 |
| chr17 | 27048682 | 27048682 | - | 0.00056214 | 0.00548658 | -30.60556465 |
| chr17 | 27058423 | 27058423 | - | 0          | 0          | -26.83823067 |
| chr17 | 27130564 | 27130564 | - | 1.27E-06   | 2.57E-05   | -27.10280374 |
| chr17 | 27130592 | 27130592 | - | 4.27E-06   | 7.70E-05   | -27.24168913 |
| chr17 | 27135015 | 27135015 | + | 0.00048702 | 0.00486636 | -36.88172043 |
| chr17 | 27143897 | 27143897 | - | 2.05E-11   | 8.23E-10   | -25.08741814 |
| chr17 | 27146200 | 27146200 | + | 6.41E-05   | 0.00085777 | -29.82142857 |
| chr17 | 27179463 | 27179463 | - | 0          | 0          | -28.60908907 |
| chr17 | 27179508 | 27179508 | - | 0          | 0          | -26.10739038 |
| chr17 | 27201373 | 27201373 | - | 0          | 0          | -28.48912105 |
| chr17 | 27250780 | 27250780 | + | 4.85E-13   | 2.31E-11   | -32.67071789 |
| chr17 | 27250781 | 27250781 | - | 9.11E-09   | 2.63E-07   | -27.46851305 |
| chr17 | 27251233 | 27251233 | - | 1.22E-09   | 3.98E-08   | -29.14121241 |
| chr17 | 27432795 | 27432795 | + | 1.37E-14   | 7.54E-13   | -25.8601201  |
| chr17 | 27502442 | 27502442 | - | 0          | 0          | -43.94317787 |
| chr17 | 27502458 | 27502458 | + | 0          | 0          | -35.12814072 |
| chr17 | 27502459 | 27502459 | - | 0          | 0          | -28.28002812 |
| chr17 | 27502462 | 27502462 | + | 0          | 0          | -26.78735943 |

|       |          |          |   |            |            |              |
|-------|----------|----------|---|------------|------------|--------------|
| chr17 | 27502501 | 27502501 | + | 0          | 0          | -38.53068073 |
| chr17 | 27502502 | 27502502 | - | 0          | 0          | -35.63170586 |
| chr17 | 27502544 | 27502544 | - | 0          | 0          | -28.06213691 |
| chr17 | 27502893 | 27502893 | - | 0.00015348 | 0.00182554 | -30.75913777 |
| chr17 | 27502933 | 27502933 | + | 1.24E-06   | 2.50E-05   | -27.22715319 |
| chr17 | 27546163 | 27546163 | + | 0          | 0          | -29.66753895 |
| chr17 | 27657157 | 27657157 | + | 1.13E-11   | 4.68E-10   | -27.61755348 |
| chr17 | 27675811 | 27675811 | + | 0.00032205 | 0.00343787 | 39.76190476  |
| chr17 | 28076094 | 28076094 | - | 0          | 0          | -25.86264895 |
| chr17 | 28076102 | 28076102 | - | 0          | 0          | -27.18884916 |
| chr17 | 28076138 | 28076138 | + | 0          | 0          | -26.87605151 |
| chr17 | 28076139 | 28076139 | - | 0          | 0          | -27.26588873 |
| chr17 | 28076145 | 28076145 | + | 0          | 0          | -30.84205138 |
| chr17 | 28076146 | 28076146 | - | 0          | 0          | -33.01373552 |
| chr17 | 28076161 | 28076161 | + | 0          | 0          | -25.86859427 |
| chr17 | 28076162 | 28076162 | - | 0          | 0          | -26.71754548 |
| chr17 | 28076163 | 28076163 | + | 0          | 0          | -26.97545955 |
| chr17 | 28076164 | 28076164 | - | 0          | 0          | -32.7670305  |
| chr17 | 28076172 | 28076172 | + | 0          | 0          | -28.67681374 |
| chr17 | 28076173 | 28076173 | - | 0          | 0          | -32.7186674  |
| chr17 | 28076184 | 28076184 | - | 0          | 0          | -25.63372966 |
| chr17 | 28084545 | 28084545 | + | 0          | 0          | -30.0583601  |
| chr17 | 28084579 | 28084579 | + | 0          | 0          | -28.38351757 |
| chr17 | 28084634 | 28084634 | - | 0          | 0          | -32.52777032 |
| chr17 | 28099600 | 28099600 | - | 3.84E-13   | 1.85E-11   | -25.79365079 |
| chr17 | 28131997 | 28131997 | + | 3.66E-15   | 2.14E-13   | -28.82591093 |
| chr17 | 28141353 | 28141353 | + | 0          | 0          | -28.81749048 |
| chr17 | 28145490 | 28145490 | + | 0          | 0          | -43.6778307  |
| chr17 | 28145495 | 28145495 | + | 1.11E-16   | 7.26E-15   | -30.22439866 |
| chr17 | 28145521 | 28145521 | + | 0          | 0          | -36.84977092 |
| chr17 | 28146325 | 28146325 | + | 0          | 0          | -25.64817747 |
| chr17 | 28172042 | 28172042 | - | 5.18E-13   | 2.46E-11   | -25.77391806 |
| chr17 | 28172048 | 28172048 | - | 0          | 0          | -38.65018801 |
| chr17 | 28183456 | 28183456 | + | 0          | 0          | -39.65954926 |
| chr17 | 28183464 | 28183464 | + | 0          | 0          | -32.85065846 |
| chr17 | 28183471 | 28183471 | + | 0          | 0          | -33.86067594 |
| chr17 | 28225897 | 28225897 | - | 9.41E-06   | 0.00015679 | -44.87344487 |
| chr17 | 28225908 | 28225908 | + | 0          | 0          | -34.34027778 |
| chr17 | 28226047 | 28226047 | - | 0          | 0          | -44.83426551 |
| chr17 | 28226051 | 28226051 | - | 0          | 0          | -30.13590911 |
| chr17 | 28280020 | 28280020 | - | 1.11E-16   | 7.26E-15   | -25.10370836 |

|       |          |          |   |          |            |              |
|-------|----------|----------|---|----------|------------|--------------|
| chr17 | 28327934 | 28327934 | + | 5.79E-07 | 1.25E-05   | -31.56370656 |
| chr17 | 28327942 | 28327942 | - | 5.04E-05 | 0.00069419 | -30.80357143 |
| chr17 | 28328044 | 28328044 | + | 9.99E-16 | 6.10E-14   | -35.52054116 |
| chr17 | 28333716 | 28333716 | + | 0        | 0          | -32.87242798 |
| chr17 | 28333841 | 28333841 | - | 0        | 0          | -31.88943479 |
| chr17 | 28333847 | 28333847 | - | 0        | 0          | -32.59518089 |
| chr17 | 28340476 | 28340476 | - | 1.47E-07 | 3.51E-06   | -27.68995411 |
| chr17 | 28345830 | 28345830 | + | 0        | 0          | -25.00565319 |
| chr17 | 28345868 | 28345868 | + | 0        | 0          | -26.12642296 |
| chr17 | 28345869 | 28345869 | - | 0        | 0          | -34.00929924 |
| chr17 | 28345909 | 28345909 | - | 0        | 0          | -29.17445525 |
| chr17 | 28349652 | 28349652 | + | 0        | 0          | -34.36727473 |
| chr17 | 28349746 | 28349746 | - | 0        | 0          | -27.77890304 |
| chr17 | 28351908 | 28351908 | - | 0        | 0          | -28.0531505  |
| chr17 | 28351914 | 28351914 | - | 0        | 0          | -33.19106163 |
| chr17 | 28351936 | 28351936 | - | 0        | 0          | -47.58986337 |
| chr17 | 28351943 | 28351943 | - | 0        | 0          | -34.22396877 |
| chr17 | 28358504 | 28358504 | + | 0        | 0          | -30.9948787  |
| chr17 | 28358573 | 28358573 | - | 0        | 0          | -25.45213071 |
| chr17 | 28358638 | 28358638 | - | 0        | 0          | -25.87436237 |
| chr17 | 28359096 | 28359096 | - | 9.55E-10 | 3.16E-08   | -29.78087384 |
| chr17 | 28359107 | 28359107 | - | 2.63E-12 | 1.16E-10   | -36.30115878 |
| chr17 | 28359109 | 28359109 | - | 7.84E-08 | 1.96E-06   | -26.88644689 |
| chr17 | 28365230 | 28365230 | + | 0        | 0          | -30.49728752 |
| chr17 | 28517606 | 28517606 | + | 3.33E-16 | 2.11E-14   | -29.20060542 |
| chr17 | 28517628 | 28517628 | + | 0        | 0          | -35.52257267 |
| chr17 | 28517694 | 28517694 | - | 0        | 0          | -25.8955154  |
| chr17 | 28517739 | 28517739 | + | 0        | 0          | -35.61862245 |
| chr17 | 28517748 | 28517748 | + | 2.79E-09 | 8.65E-08   | -26.41069888 |
| chr17 | 28532095 | 28532095 | - | 0        | 0          | -38.27422338 |
| chr17 | 28532100 | 28532100 | - | 0        | 0          | -31.29511125 |
| chr17 | 28532127 | 28532127 | - | 0        | 0          | -33.60677113 |
| chr17 | 28532146 | 28532146 | + | 1.05E-10 | 3.90E-09   | -29.24242424 |
| chr17 | 28874812 | 28874812 | + | 1.07E-05 | 0.00017614 | -51          |
| chr17 | 28876790 | 28876790 | + | 1.11E-16 | 7.26E-15   | -30.68474318 |
| chr17 | 28876908 | 28876908 | - | 1.77E-14 | 9.65E-13   | -28.14161769 |
| chr17 | 28899722 | 28899722 | - | 0        | 0          | -25.17510851 |
| chr17 | 28905324 | 28905324 | - | 3.11E-15 | 1.82E-13   | -34.85502631 |
| chr17 | 28943950 | 28943950 | + | 9.70E-05 | 0.00122796 | -34.59801265 |
| chr17 | 29025160 | 29025160 | + | 0        | 0          | -25.01553152 |
| chr17 | 29165476 | 29165476 | + | 0        | 0          | -40.97189512 |

|       |          |          |   |            |            |              |
|-------|----------|----------|---|------------|------------|--------------|
| chr17 | 29165502 | 29165502 | + | 0          | 0          | -39.85040321 |
| chr17 | 29189492 | 29189492 | + | 6.86E-09   | 2.02E-07   | -25.67834563 |
| chr17 | 29189510 | 29189510 | + | 8.52E-09   | 2.47E-07   | -25.22605388 |
| chr17 | 29194035 | 29194035 | - | 0.00019554 | 0.00224755 | -35.86466165 |
| chr17 | 29322670 | 29322670 | + | 0          | 0          | -26.76018672 |
| chr17 | 29326376 | 29326376 | - | 3.08E-14   | 1.64E-12   | -28.21527993 |
| chr17 | 29326446 | 29326446 | + | 0          | 0          | -31.11022925 |
| chr17 | 29326591 | 29326591 | + | 0          | 0          | -26.72697368 |
| chr17 | 29326613 | 29326613 | - | 0          | 0          | -39.31302759 |
| chr17 | 29326628 | 29326628 | - | 0          | 0          | -26.14550498 |
| chr17 | 29326652 | 29326652 | + | 0          | 0          | -27.05785524 |
| chr17 | 29326660 | 29326660 | + | 0          | 0          | -26.77207682 |
| chr17 | 29326822 | 29326822 | + | 0          | 0          | -29.1284464  |
| chr17 | 29326823 | 29326823 | - | 0          | 0          | -27.69721523 |
| chr17 | 29326881 | 29326881 | + | 0          | 0          | -31.55892047 |
| chr17 | 29326898 | 29326898 | - | 0          | 0          | -28.94898605 |
| chr17 | 29326916 | 29326916 | - | 0          | 0          | -37.2077936  |
| chr17 | 29398643 | 29398643 | + | 1.27E-07   | 3.07E-06   | -29.34362934 |
| chr17 | 29398884 | 29398884 | - | 1.63E-09   | 5.23E-08   | -26.73109216 |
| chr17 | 29398911 | 29398911 | + | 3.45E-10   | 1.20E-08   | -25.11845307 |
| chr17 | 29415992 | 29415992 | - | 0          | 0          | -27.74670043 |
| chr17 | 29416007 | 29416007 | - | 0          | 0          | -25.54665853 |
| chr17 | 29434192 | 29434192 | - | 0.00065647 | 0.00624238 | -26.40306122 |
| chr17 | 29451069 | 29451069 | + | 0          | 0          | -27.37057096 |
| chr17 | 29451075 | 29451075 | + | 0          | 0          | -30.13516571 |
| chr17 | 29451184 | 29451184 | - | 0          | 0          | -32.45277578 |
| chr17 | 29451431 | 29451431 | - | 0.00031424 | 0.00336735 | -31.82849937 |
| chr17 | 29460134 | 29460134 | - | 1.70E-14   | 9.30E-13   | -29.02097902 |
| chr17 | 29463919 | 29463919 | + | 0.00055038 | 0.00539116 | -31.47942158 |
| chr17 | 29464117 | 29464117 | - | 0          | 0          | -31.67400685 |
| chr17 | 29464486 | 29464486 | + | 0          | 0          | -40.22398946 |
| chr17 | 29464487 | 29464487 | - | 0          | 0          | -54.51705187 |
| chr17 | 29464496 | 29464496 | - | 0          | 0          | -29.1212613  |
| chr17 | 29465072 | 29465072 | - | 0          | 0          | -29.29519774 |
| chr17 | 29465121 | 29465121 | + | 3.77E-10   | 1.31E-08   | -64.69216418 |
| chr17 | 29467260 | 29467260 | + | 8.60E-08   | 2.14E-06   | -40.8765653  |
| chr17 | 29467654 | 29467654 | - | 0          | 0          | -27.36673774 |
| chr17 | 29467670 | 29467670 | - | 0          | 0          | -38.60930736 |
| chr17 | 29467841 | 29467841 | - | 0          | 0          | -26.73537573 |
| chr17 | 29467845 | 29467845 | - | 0          | 0          | -25.4638882  |
| chr17 | 29570661 | 29570661 | + | 0          | 0          | -31.84235598 |

|       |          |          |   |            |            |              |
|-------|----------|----------|---|------------|------------|--------------|
| chr17 | 29584254 | 29584254 | - | 1.24E-14   | 6.89E-13   | -26.31022192 |
| chr17 | 29584270 | 29584270 | - | 0          | 0          | -32.65706918 |
| chr17 | 29584283 | 29584283 | - | 0          | 0          | -30.35240665 |
| chr17 | 29584288 | 29584288 | - | 0          | 0          | -29.56295991 |
| chr17 | 29597468 | 29597468 | + | 1.54E-05   | 0.00024406 | 29.16666667  |
| chr17 | 29746541 | 29746541 | + | 0          | 0          | -26.37912453 |
| chr17 | 29746671 | 29746671 | + | 0          | 0          | -28.99601621 |
| chr17 | 29746875 | 29746875 | + | 2.49E-11   | 9.94E-10   | -26.47146089 |
| chr17 | 29746876 | 29746876 | - | 0          | 0          | -32.19667014 |
| chr17 | 29746884 | 29746884 | + | 1.11E-16   | 7.26E-15   | -30.98247004 |
| chr17 | 29746885 | 29746885 | - | 2.22E-16   | 1.43E-14   | -29.68898386 |
| chr17 | 29746908 | 29746908 | - | 0          | 0          | -34.6129277  |
| chr17 | 29747451 | 29747451 | + | 1.14E-09   | 3.74E-08   | -25.55092317 |
| chr17 | 29769948 | 29769948 | - | 1.64E-09   | 5.25E-08   | -28.2018493  |
| chr17 | 29874163 | 29874163 | - | 5.81E-12   | 2.47E-10   | -29.31515004 |
| chr17 | 29874173 | 29874173 | - | 2.10E-13   | 1.04E-11   | -26.977657   |
| chr17 | 29874205 | 29874205 | + | 0          | 0          | -32.07983396 |
| chr17 | 29874282 | 29874282 | + | 0          | 0          | -35.74073187 |
| chr17 | 29874283 | 29874283 | - | 1.21E-12   | 5.54E-11   | -44.42912646 |
| chr17 | 29874387 | 29874387 | - | 0          | 0          | -29.71106227 |
| chr17 | 29874750 | 29874750 | - | 0          | 0          | -36.06150752 |
| chr17 | 29928809 | 29928809 | + | 2.96E-07   | 6.72E-06   | -25.05968779 |
| chr17 | 30197545 | 30197545 | + | 3.47E-12   | 1.51E-10   | -28.25930372 |
| chr17 | 30206921 | 30206921 | - | 0.00056262 | 0.0054905  | 29.5959596   |
| chr17 | 30347198 | 30347198 | + | 5.97E-14   | 3.11E-12   | -33.56773063 |
| chr17 | 30347202 | 30347202 | + | 7.88E-15   | 4.45E-13   | -34.94894895 |
| chr17 | 30347288 | 30347288 | - | 0          | 0          | -39.77889717 |
| chr17 | 30347570 | 30347570 | - | 1.50E-05   | 0.00023766 | -27.41596639 |
| chr17 | 30872735 | 30872735 | - | 8.03E-05   | 0.00104237 | -37.87545788 |
| chr17 | 30913599 | 30913599 | - | 5.55E-15   | 3.18E-13   | -25.49124913 |
| chr17 | 31037475 | 31037475 | - | 1.01E-09   | 3.34E-08   | -27.59803922 |
| chr17 | 31276762 | 31276762 | + | 0          | 0          | -31.85612517 |
| chr17 | 31305426 | 31305426 | + | 0          | 0          | -28.31492201 |
| chr17 | 31381523 | 31381523 | + | 0          | 0          | -25.26560165 |
| chr17 | 31381541 | 31381541 | + | 0          | 0          | -27.34297748 |
| chr17 | 31381563 | 31381563 | - | 0          | 0          | -25.85038538 |
| chr17 | 31482862 | 31482862 | + | 1.11E-10   | 4.12E-09   | -25.70633875 |
| chr17 | 31639790 | 31639790 | + | 0.0001199  | 0.00147453 | -30.3525641  |
| chr17 | 31724294 | 31724294 | - | 0.00083514 | 0.00761515 | -33.47338936 |
| chr17 | 31725805 | 31725805 | + | 0          | 0          | -28.75800011 |
| chr17 | 31856803 | 31856803 | + | 7.59E-08   | 1.90E-06   | -27.25020644 |

|       |          |          |   |            |            |              |
|-------|----------|----------|---|------------|------------|--------------|
| chr17 | 31856830 | 31856830 | + | 0          | 0          | -46.9374597  |
| chr17 | 31877978 | 31877978 | + | 0          | 0          | -30.28445001 |
| chr17 | 31889605 | 31889605 | + | 0          | 0          | -29.39160767 |
| chr17 | 32113380 | 32113380 | + | 0          | 0          | -25.81552767 |
| chr17 | 32113407 | 32113407 | + | 0          | 0          | -25.49783331 |
| chr17 | 32165677 | 32165677 | + | 0          | 0          | -27.52220619 |
| chr17 | 32165782 | 32165782 | + | 0          | 0          | -25.73125023 |
| chr17 | 32165820 | 32165820 | - | 0          | 0          | -33.24251417 |
| chr17 | 32165841 | 32165841 | - | 0          | 0          | -28.2295915  |
| chr17 | 32396708 | 32396708 | - | 0          | 0          | -25.20629739 |
| chr17 | 32443371 | 32443371 | + | 0          | 0          | -32.80250851 |
| chr17 | 32492092 | 32492092 | - | 0          | 0          | -41.67427239 |
| chr17 | 32506559 | 32506559 | + | 0.00028525 | 0.00310257 | -34.7826087  |
| chr17 | 32676523 | 32676523 | - | 0          | 0          | -25.12644223 |
| chr17 | 32877311 | 32877311 | + | 2.15E-06   | 4.13E-05   | -26.56124093 |
| chr17 | 34042005 | 34042005 | + | 2.14E-08   | 5.86E-07   | -40.21505376 |
| chr17 | 34058564 | 34058564 | + | 0          | 0          | -25.43380265 |
| chr17 | 34094490 | 34094490 | + | 2.03E-09   | 6.43E-08   | -27.21797803 |
| chr17 | 34094513 | 34094513 | + | 6.62E-12   | 2.81E-10   | -30.63524969 |
| chr17 | 34094524 | 34094524 | + | 0          | 0          | -38.94477095 |
| chr17 | 34094537 | 34094537 | + | 4.55E-13   | 2.17E-11   | -32.79813027 |
| chr17 | 34128988 | 34128988 | + | 0          | 0          | -28.19465261 |
| chr17 | 34129021 | 34129021 | + | 0          | 0          | -32.93246994 |
| chr17 | 34129022 | 34129022 | - | 0          | 0          | -29.90752367 |
| chr17 | 34129047 | 34129047 | + | 0          | 0          | -46.24586989 |
| chr17 | 34129048 | 34129048 | - | 0          | 0          | -26.39557111 |
| chr17 | 34129079 | 34129079 | + | 0          | 0          | -36.79678313 |
| chr17 | 34139503 | 34139503 | + | 0          | 0          | -39.51743613 |
| chr17 | 34139607 | 34139607 | + | 0          | 0          | -27.46201888 |
| chr17 | 34139608 | 34139608 | - | 0          | 0          | -30.45694655 |
| chr17 | 34139626 | 34139626 | + | 0          | 0          | -26.07111273 |
| chr17 | 34139644 | 34139644 | + | 0          | 0          | -26.90043492 |
| chr17 | 34139651 | 34139651 | + | 0          | 0          | -25.56024413 |
| chr17 | 34139652 | 34139652 | - | 0          | 0          | -26.6639405  |
| chr17 | 34139697 | 34139697 | + | 1.08E-10   | 4.00E-09   | -28.56245513 |
| chr17 | 34139698 | 34139698 | - | 0          | 0          | -37.93150582 |
| chr17 | 34139902 | 34139902 | - | 2.72E-10   | 9.63E-09   | -26.45860759 |
| chr17 | 34152118 | 34152118 | + | 0.0009134  | 0.00819924 | -26.90092166 |
| chr17 | 34196942 | 34196942 | + | 0          | 0          | -32.12391375 |
| chr17 | 34196975 | 34196975 | + | 0          | 0          | -25.0382785  |
| chr17 | 34563946 | 34563946 | + | 2.22E-09   | 7.00E-08   | -41.15315315 |



|       |          |          |   |            |            |              |
|-------|----------|----------|---|------------|------------|--------------|
| chr17 | 34563964 | 34563964 | + | 2.24E-09   | 7.04E-08   | -39.18918919 |
| chr17 | 34564437 | 34564437 | + | 2.24E-06   | 4.30E-05   | -25.55555556 |
| chr17 | 34572737 | 34572737 | - | 1.82E-05   | 0.00028219 | -31.17509119 |
| chr17 | 34594001 | 34594001 | - | 2.76E-09   | 8.59E-08   | -28.71559633 |
| chr17 | 34612429 | 34612429 | + | 1.21E-05   | 0.00019574 | -31.81818182 |
| chr17 | 34629570 | 34629570 | - | 2.70E-12   | 1.19E-10   | -51.52350932 |
| chr17 | 34629572 | 34629572 | - | 4.05E-14   | 2.14E-12   | -55.52298468 |
| chr17 | 34629587 | 34629587 | - | 2.13E-13   | 1.05E-11   | -53.54166667 |
| chr17 | 34629590 | 34629590 | - | 4.30E-14   | 2.27E-12   | -54.7439759  |
| chr17 | 34629595 | 34629595 | - | 2.11E-15   | 1.25E-13   | -57.12111604 |
| chr17 | 34629603 | 34629603 | - | 6.22E-09   | 1.84E-07   | -39.24963925 |
| chr17 | 34630022 | 34630022 | + | 0          | 0          | -33.27245053 |
| chr17 | 34630059 | 34630059 | + | 0          | 0          | -29.46430019 |
| chr17 | 34630187 | 34630187 | - | 1.39E-08   | 3.91E-07   | -26.79238872 |
| chr17 | 34631529 | 34631529 | + | 5.59E-05   | 0.00076096 | -28.10559006 |
| chr17 | 34631782 | 34631782 | - | 0.00014401 | 0.00172808 | -31.98874296 |
| chr17 | 34651721 | 34651721 | + | 0.00078227 | 0.00721518 | -28.7214886  |
| chr17 | 34660591 | 34660591 | + | 1.12E-05   | 0.00018338 | -27.7391356  |
| chr17 | 34660601 | 34660601 | + | 1.33E-07   | 3.20E-06   | -33.55329647 |
| chr17 | 34679904 | 34679904 | - | 0.00105975 | 0.00925846 | -29.07317073 |
| chr17 | 34881801 | 34881801 | - | 0          | 0          | -25.70138315 |
| chr17 | 34881818 | 34881818 | - | 0          | 0          | -33.0675389  |
| chr17 | 34895415 | 34895415 | + | 3.65E-13   | 1.76E-11   | -25.37200504 |
| chr17 | 34914298 | 34914298 | + | 1.37E-14   | 7.54E-13   | -25.66422546 |
| chr17 | 34914299 | 34914299 | - | 7.71E-11   | 2.91E-09   | -30.40212799 |
| chr17 | 34914426 | 34914426 | - | 0          | 0          | -34.87032171 |
| chr17 | 34914431 | 34914431 | - | 0          | 0          | -33.43182237 |
| chr17 | 34914435 | 34914435 | - | 0          | 0          | -39.16718548 |
| chr17 | 34914446 | 34914446 | - | 0          | 0          | -33.64025833 |
| chr17 | 34914458 | 34914458 | - | 0          | 0          | -35.70364737 |
| chr17 | 34914511 | 34914511 | - | 0          | 0          | -25.69573284 |
| chr17 | 35016588 | 35016588 | + | 3.92E-06   | 7.13E-05   | -44.87179487 |
| chr17 | 35060225 | 35060225 | - | 3.46E-05   | 0.00049885 | -28.33333333 |
| chr17 | 35220790 | 35220790 | + | 1.27E-14   | 7.01E-13   | -25.33079305 |
| chr17 | 35220796 | 35220796 | + | 3.89E-15   | 2.26E-13   | -25.84472493 |
| chr17 | 35220818 | 35220818 | + | 0          | 0          | -27.88111434 |
| chr17 | 35276526 | 35276526 | + | 0          | 0          | -27.31907996 |
| chr17 | 35506127 | 35506127 | - | 0          | 0          | -26.08467114 |
| chr17 | 35506605 | 35506605 | - | 0          | 0          | -30.62202776 |
| chr17 | 35506646 | 35506646 | - | 0          | 0          | -29.68960312 |
| chr17 | 35507342 | 35507342 | - | 0          | 0          | -28.51638641 |

|       |          |          |   |            |            |              |
|-------|----------|----------|---|------------|------------|--------------|
| chr17 | 35686564 | 35686564 | + | 0          | 0          | -26.36720005 |
| chr17 | 35701511 | 35701511 | - | 6.14E-06   | 0.00010679 | -50.43956044 |
| chr17 | 35702183 | 35702183 | + | 0          | 0          | -36.54579452 |
| chr17 | 35702293 | 35702293 | - | 0          | 0          | -31.18894994 |
| chr17 | 35702325 | 35702325 | + | 0          | 0          | -33.20133879 |
| chr17 | 35736678 | 35736678 | - | 0.00018296 | 0.00212383 | -40.61538462 |
| chr17 | 35812138 | 35812138 | + | 6.35E-07   | 1.36E-05   | -51.33928571 |
| chr17 | 35816348 | 35816348 | + | 3.75E-06   | 6.84E-05   | -26.70356592 |
| chr17 | 36153370 | 36153370 | + | 1.21E-13   | 6.11E-12   | -25.35415785 |
| chr17 | 36216219 | 36216219 | + | 0          | 0          | -41.87555085 |
| chr17 | 36216241 | 36216241 | + | 2.59E-06   | 4.90E-05   | -25.60921577 |
| chr17 | 36216395 | 36216395 | - | 4.38E-13   | 2.09E-11   | -32.78546713 |
| chr17 | 36216426 | 36216426 | - | 5.23E-11   | 2.01E-09   | -28.203962   |
| chr17 | 36248718 | 36248718 | + | 0          | 0          | -29.29161567 |
| chr17 | 36248719 | 36248719 | - | 0          | 0          | -33.15424012 |
| chr17 | 36248731 | 36248731 | - | 0          | 0          | -25.95477362 |
| chr17 | 36248938 | 36248938 | - | 1.32E-09   | 4.28E-08   | -37.69414576 |
| chr17 | 36248941 | 36248941 | - | 6.33E-15   | 3.61E-13   | -49.23054158 |
| chr17 | 36248951 | 36248951 | - | 3.16E-09   | 9.74E-08   | -37.1632445  |
| chr17 | 36248970 | 36248970 | - | 9.59E-05   | 0.00121631 | -25.2401936  |
| chr17 | 36249017 | 36249017 | + | 0          | 0          | -36.66863969 |
| chr17 | 36249018 | 36249018 | - | 4.11E-15   | 2.38E-13   | -41.12015845 |
| chr17 | 36249031 | 36249031 | - | 1.34E-09   | 4.35E-08   | -30.58978873 |
| chr17 | 36249039 | 36249039 | + | 2.22E-16   | 1.43E-14   | -31.08037446 |
| chr17 | 36249067 | 36249067 | + | 9.15E-12   | 3.82E-10   | -25.65088757 |
| chr17 | 36988820 | 36988820 | + | 0          | 0          | -31.55015144 |
| chr17 | 36988821 | 36988821 | - | 2.36E-13   | 1.16E-11   | -25.35529752 |
| chr17 | 36988872 | 36988872 | - | 0          | 0          | -25.79488744 |
| chr17 | 36989252 | 36989252 | + | 0          | 0          | -43.68289191 |
| chr17 | 37003241 | 37003241 | + | 1.00E-06   | 2.06E-05   | -31.1792996  |
| chr17 | 39843571 | 39843571 | + | 2.47E-06   | 4.69E-05   | -28.94570707 |
| chr17 | 39844942 | 39844942 | - | 0          | 0          | 36.13380172  |
| chr17 | 39844948 | 39844948 | - | 0          | 0          | 31.61081376  |
| chr17 | 39844956 | 39844956 | - | 0          | 0          | 29.29936306  |
| chr17 | 39844964 | 39844964 | - | 0          | 0          | 37.39490647  |
| chr17 | 39844975 | 39844975 | - | 0          | 0          | 31.93679496  |
| chr17 | 39844979 | 39844979 | - | 0          | 0          | 38.95066636  |
| chr17 | 39845005 | 39845005 | + | 0          | 0          | 39.99882825  |
| chr17 | 39845022 | 39845022 | + | 0          | 0          | 53.05263158  |
| chr17 | 39845037 | 39845037 | + | 0          | 0          | 40.0868786   |
| chr17 | 39845042 | 39845042 | + | 0          | 0          | 36.68595041  |

|       |          |          |   |            |            |              |
|-------|----------|----------|---|------------|------------|--------------|
| chr17 | 39845045 | 39845045 | + | 0          | 0          | 33.49190939  |
| chr17 | 39846032 | 39846032 | - | 5.20E-05   | 0.00071385 | -44.13919414 |
| chr17 | 40904205 | 40904205 | + | 0          | 0          | -34.8628637  |
| chr17 | 40904206 | 40904206 | - | 0          | 0          | -30.99959674 |
| chr17 | 40904237 | 40904237 | + | 0          | 0          | -32.578085   |
| chr17 | 40904238 | 40904238 | - | 0          | 0          | -34.22549537 |
| chr17 | 40904336 | 40904336 | - | 0          | 0          | -28.4729064  |
| chr17 | 43046410 | 43046410 | - | 4.96E-07   | 1.08E-05   | -25.95075956 |
| chr17 | 43077163 | 43077163 | + | 0          | 0          | -31.58836603 |
| chr17 | 43077218 | 43077218 | - | 0          | 0          | -26.4817804  |
| chr17 | 43077234 | 43077234 | - | 0          | 0          | -26.61816862 |
| chr17 | 43077245 | 43077245 | - | 0          | 0          | -31.80152008 |
| chr17 | 43077249 | 43077249 | - | 0          | 0          | -32.19312878 |
| chr17 | 43077255 | 43077255 | + | 0          | 0          | -33.41464899 |
| chr17 | 43077256 | 43077256 | - | 0          | 0          | -29.87256673 |
| chr17 | 43077298 | 43077298 | + | 0          | 0          | -33.82540199 |
| chr17 | 43077299 | 43077299 | - | 0          | 0          | -25.50530924 |
| chr17 | 43077336 | 43077336 | - | 0          | 0          | -27.82426151 |
| chr17 | 43327821 | 43327821 | + | 0          | 0          | -37.68287732 |
| chr17 | 43334132 | 43334132 | + | 0          | 0          | -29.88921086 |
| chr17 | 43334138 | 43334138 | + | 0          | 0          | -42.06012746 |
| chr17 | 43334261 | 43334261 | - | 0          | 0          | -29.43737128 |
| chr17 | 43358058 | 43358058 | + | 0          | 0          | -26.44081792 |
| chr17 | 43534756 | 43534756 | + | 1.07E-10   | 3.96E-09   | -29.17710944 |
| chr17 | 43534762 | 43534762 | + | 5.16E-11   | 1.98E-09   | -29.1221374  |
| chr17 | 44129477 | 44129477 | + | 0.0002089  | 0.00237796 | 48.28349945  |
| chr17 | 44429759 | 44429759 | - | 0          | 0          | -25.98476815 |
| chr17 | 44598370 | 44598370 | - | 4.70E-08   | 1.22E-06   | -34.89285714 |
| chr17 | 45261537 | 45261537 | + | 0          | 0          | -42.5627907  |
| chr17 | 45261549 | 45261549 | + | 0          | 0          | -30.78734172 |
| chr17 | 45313012 | 45313012 | + | 4.97E-10   | 1.70E-08   | -29.37627074 |
| chr17 | 45376854 | 45376854 | - | 2.51E-06   | 4.76E-05   | -29.04045339 |
| chr17 | 45518165 | 45518165 | + | 0.00038778 | 0.00401863 | -27.60416667 |
| chr17 | 45518171 | 45518171 | + | 8.98E-05   | 0.00114851 | -31.34920635 |
| chr17 | 45581155 | 45581155 | - | 0          | 0          | -34.32014521 |
| chr17 | 45581163 | 45581163 | - | 0          | 0          | -27.09166509 |
| chr17 | 45581172 | 45581172 | - | 0          | 0          | -26.24311491 |
| chr17 | 45601338 | 45601338 | + | 0          | 0          | -26.13242231 |
| chr17 | 45601339 | 45601339 | - | 0          | 0          | -27.58788892 |
| chr17 | 45601410 | 45601410 | + | 0          | 0          | -38.76035343 |
| chr17 | 45601483 | 45601483 | + | 0          | 0          | -36.91184513 |

|       |          |          |   |            |            |              |
|-------|----------|----------|---|------------|------------|--------------|
| chr17 | 45601484 | 45601484 | - | 0          | 0          | -30.57766621 |
| chr17 | 45601568 | 45601568 | + | 2.31E-05   | 0.00034988 | -25.73811134 |
| chr17 | 45601595 | 45601595 | + | 0          | 0          | -31.31424946 |
| chr17 | 45601596 | 45601596 | - | 1.33E-09   | 4.32E-08   | -33.77303071 |
| chr17 | 45601701 | 45601701 | - | 0          | 0          | -28.39948283 |
| chr17 | 45639070 | 45639070 | + | 0          | 0          | -27.09499304 |
| chr17 | 45685057 | 45685057 | - | 0          | 0          | -26.08130934 |
| chr17 | 45685080 | 45685080 | - | 0          | 0          | -33.06392857 |
| chr17 | 45685093 | 45685093 | + | 0          | 0          | -25.51012807 |
| chr17 | 45685094 | 45685094 | - | 0          | 0          | -26.8449742  |
| chr17 | 45701212 | 45701212 | + | 5.99E-08   | 1.53E-06   | -49.29078014 |
| chr17 | 45702744 | 45702744 | + | 0          | 0          | -26.26277408 |
| chr17 | 45702763 | 45702763 | + | 0          | 0          | -34.48257006 |
| chr17 | 45705113 | 45705113 | - | 0          | 0          | -29.93411773 |
| chr17 | 45734407 | 45734407 | + | 1.39E-05   | 0.00022153 | -25.53310887 |
| chr17 | 45734586 | 45734586 | + | 2.22E-15   | 1.32E-13   | -30.95864003 |
| chr17 | 45734587 | 45734587 | - | 0          | 0          | -35.58823529 |
| chr17 | 45805577 | 45805577 | + | 0          | 0          | -31.45019059 |
| chr17 | 45805859 | 45805859 | - | 0.00030394 | 0.00327391 | -32.39118146 |
| chr17 | 45805873 | 45805873 | - | 0.00022515 | 0.00253476 | -33.37041157 |
| chr17 | 45805887 | 45805887 | + | 0          | 0          | -36.30516969 |
| chr17 | 45805893 | 45805893 | + | 0          | 0          | -29.76990555 |
| chr17 | 45805922 | 45805922 | + | 0          | 0          | -29.46033108 |
| chr17 | 45814748 | 45814748 | + | 5.33E-10   | 1.82E-08   | -30.91453525 |
| chr17 | 45814788 | 45814788 | + | 2.84E-13   | 1.38E-11   | -34.99820706 |
| chr17 | 45873679 | 45873679 | - | 0          | 0          | -42.5705301  |
| chr17 | 45873748 | 45873748 | + | 0          | 0          | -35.62447168 |
| chr17 | 45873798 | 45873798 | - | 0          | 0          | -33.96682456 |
| chr17 | 45873849 | 45873849 | + | 4.16E-08   | 1.09E-06   | -40.10989011 |
| chr17 | 45874310 | 45874310 | - | 3.77E-15   | 2.20E-13   | -43.17974453 |
| chr17 | 45885631 | 45885631 | - | 4.44E-16   | 2.79E-14   | -26.381819   |
| chr17 | 45885755 | 45885755 | + | 0          | 0          | -25.38687609 |
| chr17 | 45886548 | 45886548 | + | 0          | 0          | -32.8257097  |
| chr17 | 45886588 | 45886588 | + | 0          | 0          | -33.70128231 |
| chr17 | 45886674 | 45886674 | - | 0          | 0          | -31.28598143 |
| chr17 | 45936710 | 45936710 | + | 0          | 0          | -31.16072686 |
| chr17 | 45936739 | 45936739 | + | 0          | 0          | -36.1647428  |
| chr17 | 46027717 | 46027717 | - | 0          | 0          | -26.38821008 |
| chr17 | 46056666 | 46056666 | - | 0          | 0          | -28.87831389 |
| chr17 | 46132590 | 46132590 | - | 1.75E-05   | 0.00027225 | -33.76436782 |
| chr17 | 46428594 | 46428594 | - | 3.01E-07   | 6.82E-06   | -25.43893874 |

|       |          |          |   |           |            |              |
|-------|----------|----------|---|-----------|------------|--------------|
| chr17 | 46438179 | 46438179 | - | 8.86E-05  | 0.0011354  | -25.3907496  |
| chr17 | 46452956 | 46452956 | + | 8.73E-10  | 2.90E-08   | -28.66439087 |
| chr17 | 46453379 | 46453379 | + | 1.98E-07  | 4.64E-06   | -26.73052363 |
| chr17 | 46498489 | 46498489 | + | 0.0001373 | 0.00165814 | -28          |
| chr17 | 46511422 | 46511422 | + | 0         | 0          | -27.47130707 |
| chr17 | 46522123 | 46522123 | - | 0         | 0          | -28.44621696 |
| chr17 | 46522184 | 46522184 | - | 0         | 0          | -28.0613409  |
| chr17 | 46522210 | 46522210 | + | 0         | 0          | -28.62903854 |
| chr17 | 46522211 | 46522211 | - | 0         | 0          | -31.94778805 |
| chr17 | 46522345 | 46522345 | + | 5.28E-11  | 2.03E-09   | -25.64854784 |
| chr17 | 46621144 | 46621144 | - | 7.14E-14  | 3.69E-12   | -25.74680107 |
| chr17 | 46621320 | 46621320 | - | 0         | 0          | -27.3048036  |
| chr17 | 46624600 | 46624600 | + | 0         | 0          | -28.19740712 |
| chr17 | 46624629 | 46624629 | + | 0         | 0          | -33.48310046 |
| chr17 | 46624630 | 46624630 | - | 0         | 0          | -32.42249964 |
| chr17 | 46624666 | 46624666 | + | 0         | 0          | -27.31939986 |
| chr17 | 46624667 | 46624667 | - | 0         | 0          | -32.51763192 |
| chr17 | 46624701 | 46624701 | + | 0         | 0          | -32.85521139 |
| chr17 | 46624762 | 46624762 | + | 1.23E-07  | 2.99E-06   | -26.21556526 |
| chr17 | 46624763 | 46624763 | - | 0         | 0          | -37.67929941 |
| chr17 | 46628055 | 46628055 | + | 0         | 0          | -42.06312189 |
| chr17 | 46628246 | 46628246 | - | 1.39E-06  | 2.78E-05   | -41.40350877 |
| chr17 | 46628253 | 46628253 | - | 4.79E-05  | 0.00066441 | -35.03759398 |
| chr17 | 46651744 | 46651744 | + | 2.39E-06  | 4.57E-05   | -27.10227273 |
| chr17 | 46728962 | 46728962 | + | 0         | 0          | -27.55331072 |
| chr17 | 46729067 | 46729067 | - | 0         | 0          | -27.1480849  |
| chr17 | 46729071 | 46729071 | - | 0         | 0          | -27.55246739 |
| chr17 | 46729095 | 46729095 | + | 0         | 0          | -26.03632692 |
| chr17 | 46729127 | 46729127 | - | 0         | 0          | -26.18674203 |
| chr17 | 46729133 | 46729133 | - | 0         | 0          | -27.25389563 |
| chr17 | 46729140 | 46729140 | - | 0         | 0          | -27.29504807 |
| chr17 | 46729181 | 46729181 | + | 5.00E-15  | 2.88E-13   | -25.51594747 |
| chr17 | 46729186 | 46729186 | + | 2.89E-15  | 1.70E-13   | -26.55045788 |
| chr17 | 46729357 | 46729357 | - | 0         | 0          | -26.56030534 |
| chr17 | 46897333 | 46897333 | - | 0         | 0          | -35.02721418 |
| chr17 | 47138245 | 47138245 | - | 9.49E-14  | 4.85E-12   | -27.80058416 |
| chr17 | 47468232 | 47468232 | - | 0         | 0          | -27.41089101 |
| chr17 | 47468362 | 47468362 | - | 0         | 0          | -32.15923355 |
| chr17 | 47468378 | 47468378 | - | 4.72E-14  | 2.48E-12   | -28.24519231 |
| chr17 | 47468417 | 47468417 | + | 0         | 0          | -43.33167785 |
| chr17 | 47468420 | 47468420 | + | 0         | 0          | -34.28831374 |

|       |          |          |   |          |          |              |
|-------|----------|----------|---|----------|----------|--------------|
| chr17 | 47468422 | 47468422 | + | 0        | 0        | -43.49312925 |
| chr17 | 47468479 | 47468479 | - | 0        | 0        | -50.27978934 |
| chr17 | 47468494 | 47468494 | - | 0        | 0        | -39.31705968 |
| chr17 | 47468496 | 47468496 | - | 0        | 0        | -39.58589153 |
| chr17 | 47468524 | 47468524 | + | 0        | 0        | -37.57279708 |
| chr17 | 47468537 | 47468537 | + | 0        | 0        | -35.84037772 |
| chr17 | 47468555 | 47468555 | + | 0        | 0        | -42.07906198 |
| chr17 | 47468556 | 47468556 | - | 0        | 0        | -41.07526774 |
| chr17 | 47468559 | 47468559 | + | 0        | 0        | -42.89817963 |
| chr17 | 47468560 | 47468560 | - | 0        | 0        | -45.47745665 |
| chr17 | 47468573 | 47468573 | + | 0        | 0        | -46.52542717 |
| chr17 | 47468574 | 47468574 | - | 0        | 0        | -47.37390694 |
| chr17 | 47468582 | 47468582 | - | 0        | 0        | -40.48069792 |
| chr17 | 47468585 | 47468585 | - | 0        | 0        | -52.43195307 |
| chr17 | 47468598 | 47468598 | - | 0        | 0        | -43.55883447 |
| chr17 | 47468605 | 47468605 | + | 0        | 0        | -43.07708421 |
| chr17 | 47468606 | 47468606 | - | 0        | 0        | -53.88204389 |
| chr17 | 47468615 | 47468615 | + | 0        | 0        | -52.90866047 |
| chr17 | 47468630 | 47468630 | + | 0        | 0        | -49.61656399 |
| chr17 | 47468685 | 47468685 | - | 0        | 0        | -50.59297424 |
| chr17 | 47468688 | 47468688 | - | 0        | 0        | -52.74566745 |
| chr17 | 47468701 | 47468701 | - | 0        | 0        | -39.25739005 |
| chr17 | 47468706 | 47468706 | - | 0        | 0        | -50.73101369 |
| chr17 | 47468708 | 47468708 | - | 0        | 0        | -29.41565185 |
| chr17 | 47468710 | 47468710 | - | 0        | 0        | -51.07284661 |
| chr17 | 47468716 | 47468716 | + | 0        | 0        | -47.24920122 |
| chr17 | 47468717 | 47468717 | - | 0        | 0        | -39.77460802 |
| chr17 | 47468728 | 47468728 | + | 0        | 0        | -56.55341521 |
| chr17 | 47468729 | 47468729 | - | 0        | 0        | -51.65488881 |
| chr17 | 47468732 | 47468732 | + | 0        | 0        | -28.98019855 |
| chr17 | 47468733 | 47468733 | - | 0        | 0        | -31.96308398 |
| chr17 | 47468752 | 47468752 | + | 0        | 0        | -53.6625885  |
| chr17 | 47468753 | 47468753 | - | 0        | 0        | -40.86056166 |
| chr17 | 47468757 | 47468757 | - | 0        | 0        | -36.40669557 |
| chr17 | 47469080 | 47469080 | + | 0        | 0        | -30.46076059 |
| chr17 | 47672828 | 47672828 | + | 0        | 0        | -32.04840104 |
| chr17 | 47672929 | 47672929 | + | 0        | 0        | -36.13020752 |
| chr17 | 47703576 | 47703576 | - | 0        | 0        | -30.31862745 |
| chr17 | 47705304 | 47705304 | - | 7.14E-14 | 3.69E-12 | -28.28215398 |
| chr17 | 47705371 | 47705371 | + | 1.11E-16 | 7.26E-15 | -27.43222892 |
| chr17 | 47705372 | 47705372 | - | 0        | 0        | -30.42139838 |

|       |          |          |   |            |            |              |
|-------|----------|----------|---|------------|------------|--------------|
| chr17 | 47767797 | 47767797 | + | 0.00014869 | 0.00177652 | -32.47747748 |
| chr17 | 47773723 | 47773723 | + | 7.02E-09   | 2.06E-07   | -25.85139319 |
| chr17 | 47888164 | 47888164 | + | 0          | 0          | -32.06684767 |
| chr17 | 47888204 | 47888204 | + | 0          | 0          | -52.57774766 |
| chr17 | 47888205 | 47888205 | - | 0          | 0          | -58.85973372 |
| chr17 | 47888285 | 47888285 | - | 0          | 0          | -45.59821608 |
| chr17 | 47909300 | 47909300 | + | 0          | 0          | -29.76622845 |
| chr17 | 47947387 | 47947387 | - | 0          | 0          | -33.82837293 |
| chr17 | 47973514 | 47973514 | - | 6.14E-09   | 1.82E-07   | -27.83032185 |
| chr17 | 47973591 | 47973591 | - | 0          | 0          | -27.69296575 |
| chr17 | 47974781 | 47974781 | + | 1.77E-11   | 7.16E-10   | -27.10741254 |
| chr17 | 47976569 | 47976569 | - | 2.06E-05   | 0.00031613 | -43.03030303 |
| chr17 | 47976592 | 47976592 | - | 2.65E-10   | 9.36E-09   | -63.33333333 |
| chr17 | 48029931 | 48029931 | - | 6.56E-05   | 0.00087446 | -35.40983607 |
| chr17 | 48057403 | 48057403 | - | 0          | 0          | -25.66899071 |
| chr17 | 48467191 | 48467191 | + | 4.61E-06   | 8.25E-05   | -27.87924434 |
| chr17 | 48647495 | 48647495 | + | 0          | 0          | -27.11902953 |
| chr17 | 48939286 | 48939286 | - | 3.06E-09   | 9.47E-08   | 39.47368421  |
| chr17 | 49536130 | 49536130 | + | 4.84E-05   | 0.00067127 | -26.34750586 |
| chr17 | 50196268 | 50196268 | - | 1.04E-05   | 0.00017196 | -30.31185031 |
| chr17 | 50735172 | 50735172 | + | 0          | 0          | -28.39222478 |
| chr17 | 55956298 | 55956298 | + | 5.52E-07   | 1.19E-05   | -25.21761393 |
| chr17 | 55956299 | 55956299 | - | 3.76E-14   | 1.99E-12   | -28.63523573 |
| chr17 | 56018579 | 56018579 | - | 0          | 0          | -25.90082779 |
| chr17 | 56081178 | 56081178 | + | 0.00109641 | 0.00951905 | -27.21793635 |
| chr17 | 56138059 | 56138059 | + | 0          | 0          | -33.37213115 |
| chr17 | 56138116 | 56138116 | - | 0          | 0          | -30.52188396 |
| chr17 | 56138126 | 56138126 | - | 0          | 0          | -43.65402908 |
| chr17 | 56138136 | 56138136 | + | 0          | 0          | -35.84801382 |
| chr17 | 56138137 | 56138137 | - | 0          | 0          | -41.77889014 |
| chr17 | 56138157 | 56138157 | + | 0          | 0          | -30.99159227 |
| chr17 | 56138158 | 56138158 | - | 0          | 0          | -37.74923632 |
| chr17 | 56138164 | 56138164 | + | 0          | 0          | -37.87506913 |
| chr17 | 56138165 | 56138165 | - | 0          | 0          | -33.81662213 |
| chr17 | 56138166 | 56138166 | + | 0          | 0          | -30.51988241 |
| chr17 | 56138167 | 56138167 | - | 0          | 0          | -39.28346952 |
| chr17 | 56138173 | 56138173 | - | 0          | 0          | -32.98211737 |
| chr17 | 56184311 | 56184311 | - | 2.85E-06   | 5.34E-05   | 25.7183908   |
| chr17 | 56302773 | 56302773 | - | 8.71E-05   | 0.00111871 | -29.60917587 |
| chr17 | 56333250 | 56333250 | + | 4.31E-05   | 0.00060631 | -27.83068783 |
| chr17 | 56425032 | 56425032 | + | 0          | 0          | -26.46355654 |

|       |          |          |   |            |            |              |
|-------|----------|----------|---|------------|------------|--------------|
| chr17 | 56425046 | 56425046 | + | 0          | 0          | -30.24516526 |
| chr17 | 56469877 | 56469877 | + | 0          | 0          | -28.17708333 |
| chr17 | 56470001 | 56470001 | + | 0          | 0          | -25.84311558 |
| chr17 | 56475413 | 56475413 | - | 4.15E-06   | 7.50E-05   | -27.93495935 |
| chr17 | 56488361 | 56488361 | - | 4.52E-06   | 8.10E-05   | -27.82965478 |
| chr17 | 56510270 | 56510270 | + | 4.22E-09   | 1.28E-07   | -27.98939248 |
| chr17 | 56610275 | 56610275 | + | 5.10E-05   | 0.0007016  | -26.19877942 |
| chr17 | 56662818 | 56662818 | + | 0.00021449 | 0.00243233 | 33.85416667  |
| chr17 | 56829743 | 56829743 | + | 0          | 0          | -32.63061181 |
| chr17 | 56829779 | 56829779 | + | 0          | 0          | -25.93972637 |
| chr17 | 56829809 | 56829809 | - | 0          | 0          | -30.33903216 |
| chr17 | 56829827 | 56829827 | - | 0          | 0          | -31.31340223 |
| chr17 | 56883610 | 56883610 | + | 8.81E-05   | 0.00112947 | -26.9926456  |
| chr17 | 56899047 | 56899047 | + | 0          | 0          | -26.98888544 |
| chr17 | 56899094 | 56899094 | + | 0          | 0          | -42.15078269 |
| chr17 | 57073750 | 57073750 | + | 0.00064744 | 0.00617098 | -25.05617978 |
| chr17 | 57074188 | 57074188 | + | 0          | 0          | -26.90914746 |
| chr17 | 57087453 | 57087453 | - | 5.57E-11   | 2.13E-09   | -27.01379617 |
| chr17 | 57087466 | 57087466 | - | 6.80E-11   | 2.58E-09   | -26.98188661 |
| chr17 | 57087478 | 57087478 | - | 1.13E-13   | 5.73E-12   | -33.33600417 |
| chr17 | 57087486 | 57087486 | + | 0          | 0          | -30.88637134 |
| chr17 | 57087487 | 57087487 | - | 5.77E-15   | 3.30E-13   | -35.76406662 |
| chr17 | 57087501 | 57087501 | + | 0          | 0          | -26.27593526 |
| chr17 | 57087509 | 57087509 | + | 0          | 0          | -29.35546904 |
| chr17 | 57087510 | 57087510 | - | 0          | 0          | -32.49421354 |
| chr17 | 57087522 | 57087522 | + | 0          | 0          | -34.83323819 |
| chr17 | 57087523 | 57087523 | - | 0          | 0          | -36.35104986 |
| chr17 | 57087534 | 57087534 | + | 0          | 0          | -30.00745948 |
| chr17 | 57087535 | 57087535 | - | 0          | 0          | -34.78041688 |
| chr17 | 57087546 | 57087546 | - | 0          | 0          | -31.20380126 |
| chr17 | 57087556 | 57087556 | + | 0          | 0          | -30.88667457 |
| chr17 | 57087557 | 57087557 | - | 0          | 0          | -28.78414167 |
| chr17 | 57087560 | 57087560 | + | 0          | 0          | -29.76530612 |
| chr17 | 57087581 | 57087581 | + | 0          | 0          | -28.67645782 |
| chr17 | 57087582 | 57087582 | - | 0          | 0          | -25.70298853 |
| chr17 | 57087592 | 57087592 | + | 0          | 0          | -30.63192228 |
| chr17 | 57087609 | 57087609 | - | 0          | 0          | -26.70371599 |
| chr17 | 57087618 | 57087618 | + | 0          | 0          | -32.61607062 |
| chr17 | 57087632 | 57087632 | + | 0          | 0          | -34.92872994 |
| chr17 | 57087646 | 57087646 | + | 0          | 0          | -32.51977907 |
| chr17 | 57087652 | 57087652 | + | 0          | 0          | -33.94680649 |



|       |          |          |   |            |            |              |
|-------|----------|----------|---|------------|------------|--------------|
| chr17 | 57087664 | 57087664 | + | 0          | 0          | -40.56198977 |
| chr17 | 57087775 | 57087775 | - | 0.00020937 | 0.00238241 | -32.7595339  |
| chr17 | 57148965 | 57148965 | + | 0          | 0          | -29.22869117 |
| chr17 | 57149000 | 57149000 | + | 0          | 0          | -27.76443215 |
| chr17 | 57225178 | 57225178 | - | 2.45E-06   | 4.66E-05   | -27.0877792  |
| chr17 | 63146266 | 63146266 | - | 1.29E-11   | 5.31E-10   | -46.14337568 |
| chr17 | 63285683 | 63285683 | - | 1.31E-08   | 3.70E-07   | -27.22587719 |
| chr17 | 64210518 | 64210518 | - | 0          | 0          | -26.00154039 |
| chr17 | 64937015 | 64937015 | + | 1.92E-12   | 8.61E-11   | -28.00420168 |
| chr17 | 65548836 | 65548836 | - | 5.28E-06   | 9.32E-05   | -28.25091575 |
| chr17 | 67290998 | 67290998 | - | 3.01E-05   | 0.00044087 | -28.7132265  |
| chr17 | 67347281 | 67347281 | - | 0.00064673 | 0.00616546 | -34.09090909 |
| chr17 | 68020036 | 68020036 | - | 3.99E-05   | 0.00056619 | -26.88651218 |
| chr17 | 69158156 | 69158156 | + | 0          | 0          | -30.99931818 |
| chr17 | 69158209 | 69158209 | - | 0          | 0          | -31.21383971 |
| chr17 | 69382373 | 69382373 | + | 3.63E-12   | 1.58E-10   | -28.64028412 |
| chr17 | 70771986 | 70771986 | - | 1.40E-14   | 7.72E-13   | -25.00462085 |
| chr17 | 70809047 | 70809047 | + | 0.00010859 | 0.00135356 | -26.26716604 |
| chr17 | 70872214 | 70872214 | - | 4.11E-15   | 2.38E-13   | -25.68906115 |
| chr17 | 70872913 | 70872913 | + | 0          | 0          | -30.30319084 |
| chr17 | 71130514 | 71130514 | - | 9.41E-11   | 3.51E-09   | -31.23854412 |
| chr17 | 71137119 | 71137119 | + | 0          | 0          | -37.27106175 |
| chr17 | 71137208 | 71137208 | + | 0          | 0          | -26.4690454  |
| chr17 | 71137257 | 71137257 | + | 0          | 0          | -25.71296522 |
| chr17 | 71309165 | 71309165 | - | 5.22E-15   | 3.00E-13   | -30.66037212 |
| chr17 | 73540668 | 73540668 | + | 6.40E-05   | 0.00085591 | -41.84210526 |
| chr17 | 73726151 | 73726151 | - | 9.89E-06   | 0.00016388 | 30.30018762  |
| chr17 | 73805408 | 73805408 | - | 8.41E-13   | 3.91E-11   | -29.81609138 |
| chr17 | 73805505 | 73805505 | + | 8.59E-07   | 1.79E-05   | -40.3019024  |
| chr17 | 74272936 | 74272936 | - | 0          | 0          | -33.62665314 |
| chr17 | 74272970 | 74272970 | - | 0          | 0          | -33.95148728 |
| chr17 | 74272972 | 74272972 | - | 0          | 0          | -34.32629462 |
| chr17 | 74272975 | 74272975 | - | 0          | 0          | -32.29073526 |
| chr17 | 75073829 | 75073829 | + | 1.11E-16   | 7.26E-15   | -28.6547132  |
| chr17 | 75178553 | 75178553 | - | 2.42E-05   | 0.00036445 | -31.82957393 |
| chr17 | 78605530 | 78605530 | + | 0.00113198 | 0.0097697  | 26.85823755  |
| chr17 | 80273953 | 80273953 | + | 2.32E-07   | 5.37E-06   | -34.46210167 |
| chr17 | 80682658 | 80682658 | + | 0          | 0          | -26.16059766 |
| chr17 | 80717724 | 80717724 | + | 1.02E-10   | 3.80E-09   | -34.11949686 |
| chr17 | 80717773 | 80717773 | + | 0          | 0          | -53.45709787 |
| chr17 | 81671432 | 81671432 | + | 1.50E-12   | 6.79E-11   | -32.29023589 |

|       |          |          |   |            |            |              |
|-------|----------|----------|---|------------|------------|--------------|
| chr17 | 83139012 | 83139012 | + | 0.00068225 | 0.00644457 | -28.50877193 |
| chr17 | 83139039 | 83139039 | - | 0.0001705  | 0.00199851 | -32.09014759 |
| chr17 | 83166802 | 83166802 | + | 0          | 0          | -26.25999552 |
| chr17 | 83166803 | 83166803 | - | 0          | 0          | -26.43010744 |
| chr17 | 83197471 | 83197471 | + | 4.11E-15   | 2.38E-13   | -28.70062754 |
| chr17 | 83216169 | 83216169 | + | 0          | 0          | -25.16529656 |
| chr17 | 83216261 | 83216261 | - | 0          | 0          | -28.89973534 |
| chr17 | 83274329 | 83274329 | - | 3.11E-05   | 0.00045449 | -36.9022869  |
| chr17 | 83322669 | 83322669 | + | 0          | 0          | -48.55912062 |
| chr17 | 83322904 | 83322904 | + | 0          | 0          | -25.98156186 |
| chr17 | 83323005 | 83323005 | - | 0          | 0          | -39.66655314 |
| chr17 | 83323018 | 83323018 | + | 0          | 0          | -30.0169857  |
| chr17 | 83323019 | 83323019 | - | 0          | 0          | -30.26204304 |
| chr17 | 83323038 | 83323038 | + | 0          | 0          | -33.40830947 |
| chr17 | 83323052 | 83323052 | + | 0          | 0          | -36.02088314 |
| chr17 | 83323106 | 83323106 | - | 0          | 0          | -30.76761813 |
| chr17 | 83335247 | 83335247 | + | 0          | 0          | -30.49172483 |
| chr17 | 83335248 | 83335248 | - | 0          | 0          | -25.82789779 |
| chr17 | 83335262 | 83335262 | - | 0          | 0          | -27.6350213  |
| chr17 | 83545897 | 83545897 | + | 0          | 0          | -25.75593555 |
| chr17 | 83545918 | 83545918 | + | 0          | 0          | -28.59575142 |
| chr17 | 83545919 | 83545919 | - | 0          | 0          | -27.78865399 |
| chr17 | 83545921 | 83545921 | + | 0          | 0          | -25.53478281 |
| chr17 | 83545922 | 83545922 | - | 0          | 0          | -25.51957262 |
| chr17 | 83545953 | 83545953 | - | 0          | 0          | -26.91100088 |
| chr17 | 83546152 | 83546152 | - | 2.89E-06   | 5.42E-05   | -43.17736061 |
| chr17 | 83546423 | 83546423 | + | 0          | 0          | -28.14918452 |
| chr17 | 83546435 | 83546435 | + | 0          | 0          | -45.86437309 |
| chr17 | 83546544 | 83546544 | - | 0          | 0          | -53.7793363  |
| chr17 | 83546550 | 83546550 | - | 0          | 0          | -53.25540962 |
| chr17 | 83546559 | 83546559 | - | 0          | 0          | -52.45230023 |
| chr17 | 83546569 | 83546569 | - | 0          | 0          | -58.6970475  |
| chr17 | 83630988 | 83630988 | + | 3.33E-16   | 2.11E-14   | -25.59516736 |
| chr17 | 83630989 | 83630989 | - | 0          | 0          | -27.5217232  |
| chr17 | 83766361 | 83766361 | - | 0          | 0          | -25.36709395 |
| chr17 | 83846929 | 83846929 | - | 2.49E-10   | 8.87E-09   | -25.9845827  |
| chr17 | 83924493 | 83924493 | + | 0          | 0          | -32.51611995 |
| chr17 | 83924602 | 83924602 | - | 0          | 0          | -27.76069468 |
| chr17 | 83937735 | 83937735 | + | 0          | 0          | -31.48190562 |
| chr17 | 83937736 | 83937736 | - | 9.40E-06   | 0.0001566  | -31.097749   |
| chr17 | 83937756 | 83937756 | + | 0          | 0          | -35.04059329 |

|       |          |          |   |            |            |              |
|-------|----------|----------|---|------------|------------|--------------|
| chr17 | 83937762 | 83937762 | + | 0          | 0          | -37.75014324 |
| chr17 | 83937764 | 83937764 | + | 0          | 0          | -35.82027378 |
| chr17 | 83937781 | 83937781 | + | 0          | 0          | -37.80081855 |
| chr17 | 83937782 | 83937782 | - | 0          | 0          | -33.85598085 |
| chr17 | 83937794 | 83937794 | - | 0          | 0          | -35.29254144 |
| chr17 | 83954573 | 83954573 | + | 0          | 0          | -42.02322419 |
| chr17 | 83955496 | 83955496 | - | 2.62E-07   | 6.00E-06   | -38.01860699 |
| chr17 | 84081935 | 84081935 | - | 0          | 0          | -29.63411395 |
| chr17 | 84157385 | 84157385 | - | 1.57E-08   | 4.37E-07   | -30.18007203 |
| chr17 | 84157390 | 84157390 | - | 2.39E-07   | 5.51E-06   | -27.64305722 |
| chr17 | 85072748 | 85072748 | + | 4.68E-06   | 8.37E-05   | -26.08111738 |
| chr17 | 85619536 | 85619536 | + | 0          | 0          | -29.51420238 |
| chr17 | 85629011 | 85629011 | - | 1.30E-09   | 4.22E-08   | -29.49793212 |
| chr17 | 85800509 | 85800509 | + | 0          | 0          | -27.12948014 |
| chr17 | 85800723 | 85800723 | - | 1.33E-07   | 3.20E-06   | -54.34782609 |
| chr17 | 85800725 | 85800725 | - | 2.04E-05   | 0.00031218 | -49.11347518 |
| chr17 | 85800729 | 85800729 | - | 0.00054284 | 0.0053292  | -34.96376812 |
| chr17 | 85800762 | 85800762 | + | 0          | 0          | -43.87322603 |
| chr17 | 85800763 | 85800763 | - | 4.72E-08   | 1.22E-06   | -52.61121857 |
| chr17 | 85800794 | 85800794 | - | 0          | 0          | -28.43323051 |
| chr17 | 85800804 | 85800804 | + | 0          | 0          | -35.19412359 |
| chr17 | 85800805 | 85800805 | - | 0          | 0          | -41.39224138 |
| chr17 | 85800823 | 85800823 | - | 0          | 0          | -44.77827008 |
| chr17 | 85800831 | 85800831 | - | 0          | 0          | -47.80953641 |
| chr17 | 85800840 | 85800840 | - | 0          | 0          | -32.24850938 |
| chr17 | 86230122 | 86230122 | + | 0          | 0          | -28.41667454 |
| chr17 | 86230189 | 86230189 | - | 2.75E-09   | 8.56E-08   | -28.12451402 |
| chr17 | 86257071 | 86257071 | - | 0          | 0          | -25.53369501 |
| chr17 | 86303166 | 86303166 | + | 0          | 0          | -31.94056673 |
| chr17 | 86303223 | 86303223 | + | 0          | 0          | -29.18191169 |
| chr17 | 86303224 | 86303224 | - | 0          | 0          | -29.01987718 |
| chr17 | 86330703 | 86330703 | + | 1.33E-07   | 3.20E-06   | -38.67989056 |
| chr17 | 86536386 | 86536386 | + | 4.16E-10   | 1.44E-08   | -29.06795225 |
| chr17 | 86597400 | 86597400 | - | 8.48E-07   | 1.77E-05   | -44.84848485 |
| chr17 | 86786317 | 86786317 | + | 0          | 0          | -33.27255011 |
| chr17 | 86786318 | 86786318 | - | 0          | 0          | -27.60464473 |
| chr17 | 86786351 | 86786351 | + | 0          | 0          | -51.09189937 |
| chr17 | 86786352 | 86786352 | - | 0          | 0          | -30.36788618 |
| chr17 | 86786824 | 86786824 | + | 6.61E-14   | 3.42E-12   | -38.1713416  |
| chr17 | 86801766 | 86801766 | + | 0          | 0          | -38.13887604 |
| chr17 | 86801773 | 86801773 | + | 0          | 0          | -29.12182002 |

|       |          |          |   |            |            |              |
|-------|----------|----------|---|------------|------------|--------------|
| chr17 | 86801805 | 86801805 | + | 0          | 0          | -32.91946418 |
| chr17 | 86801936 | 86801936 | + | 0          | 0          | -28.72197718 |
| chr17 | 86906032 | 86906032 | - | 0          | 0          | -25.16594517 |
| chr17 | 87149679 | 87149679 | + | 1.88E-10   | 6.78E-09   | -26.40901771 |
| chr17 | 87179057 | 87179057 | + | 0          | 0          | -37.29089219 |
| chr17 | 87179230 | 87179230 | - | 1.79E-12   | 8.07E-11   | -34.23302147 |
| chr17 | 87286907 | 87286907 | - | 0.00016098 | 0.00190242 | -29.34818212 |
| chr17 | 87325886 | 87325886 | - | 0.00029803 | 0.00321975 | -36.84719536 |
| chr17 | 87325891 | 87325891 | - | 0.00063028 | 0.00603364 | -34.71953578 |
| chr17 | 87351844 | 87351844 | - | 0          | 0          | -26.68436877 |
| chr17 | 87351856 | 87351856 | - | 0          | 0          | -33.8968016  |
| chr17 | 87474935 | 87474935 | - | 0          | 0          | -25.84482487 |
| chr17 | 87474947 | 87474947 | - | 0          | 0          | -31.11188739 |
| chr17 | 87503441 | 87503441 | - | 0          | 0          | -33.10195769 |
| chr17 | 87529339 | 87529339 | - | 0          | 0          | -48.18481848 |
| chr17 | 87529347 | 87529347 | - | 1.49E-09   | 4.81E-08   | -29.54433132 |
| chr17 | 87529356 | 87529356 | + | 0          | 0          | -39.09715186 |
| chr17 | 87529357 | 87529357 | - | 5.33E-15   | 3.06E-13   | -38.3976107  |
| chr17 | 87529438 | 87529438 | - | 0          | 0          | -50.65789474 |
| chr17 | 87529441 | 87529441 | - | 0          | 0          | -38.98989899 |
| chr17 | 87529476 | 87529476 | - | 0          | 0          | -42.56872598 |
| chr17 | 87571090 | 87571090 | - | 0          | 0          | -29.53452437 |
| chr17 | 87609583 | 87609583 | + | 2.00E-15   | 1.19E-13   | -44.3956044  |
| chr17 | 87609596 | 87609596 | + | 7.37E-06   | 0.00012589 | -25.30814215 |
| chr17 | 87609607 | 87609607 | + | 9.09E-12   | 3.80E-10   | -37.41218319 |
| chr17 | 87609612 | 87609612 | + | 4.77E-12   | 2.05E-10   | -36.63405958 |
| chr17 | 87609629 | 87609629 | + | 0          | 0          | -52.32334869 |
| chr17 | 87609819 | 87609819 | + | 0          | 0          | -27.93093755 |
| chr17 | 87609860 | 87609860 | - | 0          | 0          | -31.65287274 |
| chr17 | 87612946 | 87612946 | - | 1.11E-16   | 7.26E-15   | -25.41120983 |
| chr17 | 87613052 | 87613052 | + | 7.51E-08   | 1.89E-06   | -27.60882528 |
| chr17 | 87635761 | 87635761 | + | 9.70E-10   | 3.21E-08   | -46.26086957 |
| chr17 | 87635779 | 87635779 | + | 2.74E-05   | 0.00040637 | -30.81260844 |
| chr17 | 87636982 | 87636982 | + | 0.00100824 | 0.00889071 | -25.31347962 |
| chr17 | 87745914 | 87745914 | + | 0          | 0          | -25.79177099 |
| chr17 | 87745928 | 87745928 | + | 0          | 0          | -27.18224962 |
| chr17 | 87745929 | 87745929 | - | 0          | 0          | -26.36682367 |
| chr17 | 87745932 | 87745932 | + | 0          | 0          | -31.63177733 |
| chr17 | 87745933 | 87745933 | - | 0          | 0          | -30.42106322 |
| chr17 | 87745936 | 87745936 | + | 0          | 0          | -27.2830869  |
| chr17 | 87745937 | 87745937 | - | 0          | 0          | -29.5519133  |

|       |          |          |   |            |            |              |
|-------|----------|----------|---|------------|------------|--------------|
| chr17 | 87877701 | 87877701 | + | 2.11E-06   | 4.07E-05   | -34.49764521 |
| chr17 | 87877945 | 87877945 | - | 5.30E-09   | 1.58E-07   | -26.66281087 |
| chr17 | 88626777 | 88626777 | + | 2.77E-11   | 1.10E-09   | -25.4928192  |
| chr17 | 88626778 | 88626778 | - | 4.17E-13   | 2.00E-11   | -26.74568159 |
| chr17 | 88886296 | 88886296 | + | 8.23E-05   | 0.00106459 | 28.57142857  |
| chr17 | 90583953 | 90583953 | + | 0          | 0          | -28.94837476 |
| chr17 | 90584104 | 90584104 | - | 0          | 0          | -30.47076485 |
| chr17 | 91088154 | 91088154 | + | 0.00029236 | 0.00316718 | -30.51948052 |
| chr17 | 91088406 | 91088406 | + | 1.94E-05   | 0.00029909 | -28.51662404 |
| chr17 | 91088603 | 91088603 | - | 5.25E-07   | 1.14E-05   | -27.12423313 |
| chr17 | 91088605 | 91088605 | - | 6.22E-15   | 3.55E-13   | -40.18298806 |
| chr17 | 91088622 | 91088622 | - | 7.51E-09   | 2.19E-07   | -31.19671739 |
| chr18 | 3839802  | 3839802  | - | 8.18E-09   | 2.38E-07   | -25.76652602 |
| chr18 | 4927990  | 4927990  | - | 0          | 0          | -30.53701332 |
| chr18 | 5428060  | 5428060  | + | 0          | 0          | -32.14208742 |
| chr18 | 5428265  | 5428265  | + | 0          | 0          | -35.18717782 |
| chr18 | 5428292  | 5428292  | + | 0          | 0          | -32.29968349 |
| chr18 | 5428293  | 5428293  | - | 0          | 0          | -33.33534161 |
| chr18 | 9214717  | 9214717  | - | 0          | 0          | -34.5175248  |
| chr18 | 9214753  | 9214753  | + | 0          | 0          | -39.41557395 |
| chr18 | 9214755  | 9214755  | + | 0          | 0          | -36.3072963  |
| chr18 | 9214804  | 9214804  | - | 0          | 0          | -43.64786061 |
| chr18 | 9214806  | 9214806  | - | 0          | 0          | -29.07897293 |
| chr18 | 9214810  | 9214810  | - | 0          | 0          | -39.61234556 |
| chr18 | 9214822  | 9214822  | - | 0          | 0          | -26.87140963 |
| chr18 | 9214851  | 9214851  | + | 0          | 0          | -31.57353376 |
| chr18 | 9214870  | 9214870  | - | 0          | 0          | -27.23475355 |
| chr18 | 9214875  | 9214875  | + | 0          | 0          | -33.65900214 |
| chr18 | 9214876  | 9214876  | - | 0          | 0          | -39.85636515 |
| chr18 | 9214894  | 9214894  | - | 0          | 0          | -30.39545848 |
| chr18 | 9214896  | 9214896  | + | 8.55E-12   | 3.58E-10   | -26.20488333 |
| chr18 | 9214897  | 9214897  | - | 0          | 0          | -45.19573442 |
| chr18 | 9214905  | 9214905  | + | 0          | 0          | -29.02526103 |
| chr18 | 9214906  | 9214906  | - | 0          | 0          | -28.13634866 |
| chr18 | 9214928  | 9214928  | + | 0          | 0          | -32.91493323 |
| chr18 | 9215031  | 9215031  | - | 0          | 0          | -30.55010266 |
| chr18 | 9215056  | 9215056  | - | 3.33E-16   | 2.11E-14   | -27.98913043 |
| chr18 | 9957555  | 9957555  | - | 0.00033665 | 0.00356875 | -27.34922861 |
| chr18 | 10866634 | 10866634 | - | 2.49E-05   | 0.00037302 | -47.22222222 |
| chr18 | 11048085 | 11048085 | - | 1.11E-16   | 7.26E-15   | -30.07113543 |
| chr18 | 11048112 | 11048112 | - | 0          | 0          | -26.72352728 |

|       |          |          |   |          |          |              |
|-------|----------|----------|---|----------|----------|--------------|
| chr18 | 11055519 | 11055519 | - | 0        | 0        | -26.01161176 |
| chr18 | 11058788 | 11058788 | + | 1.42E-11 | 5.81E-10 | -25.61714257 |
| chr18 | 11239754 | 11239754 | + | 0        | 0        | -31.17215112 |
| chr18 | 11239761 | 11239761 | + | 0        | 0        | -30.31485414 |
| chr18 | 11239923 | 11239923 | + | 0        | 0        | -35.59860089 |
| chr18 | 11240071 | 11240071 | - | 5.11E-15 | 2.94E-13 | -26.34630742 |
| chr18 | 11240096 | 11240096 | - | 0        | 0        | -25.94753137 |
| chr18 | 11897641 | 11897641 | + | 4.73E-10 | 1.62E-08 | -26.67381974 |
| chr18 | 11897655 | 11897655 | + | 6.11E-10 | 2.07E-08 | -26.70248109 |
| chr18 | 11941388 | 11941388 | - | 0        | 0        | -31.81292337 |
| chr18 | 11941401 | 11941401 | - | 0        | 0        | -34.54681953 |
| chr18 | 11941433 | 11941433 | - | 0        | 0        | -35.17995704 |
| chr18 | 13031663 | 13031663 | - | 0        | 0        | -30.97954367 |
| chr18 | 13031696 | 13031696 | - | 7.39E-14 | 3.81E-12 | -30.3300376  |
| chr18 | 13032159 | 13032159 | - | 0        | 0        | -33.87702566 |
| chr18 | 13032170 | 13032170 | + | 2.13E-12 | 9.50E-11 | -25.76585366 |
| chr18 | 13032332 | 13032332 | + | 0        | 0        | -28.90487087 |
| chr18 | 13032333 | 13032333 | - | 0        | 0        | -26.85871456 |
| chr18 | 13032340 | 13032340 | + | 0        | 0        | -44.38880036 |
| chr18 | 13032365 | 13032365 | + | 3.22E-15 | 1.89E-13 | -25.83113828 |
| chr18 | 13032474 | 13032474 | - | 0        | 0        | -27.43061309 |
| chr18 | 14502909 | 14502909 | + | 0        | 0        | -28.86414997 |
| chr18 | 14502912 | 14502912 | + | 0        | 0        | -33.03689688 |
| chr18 | 14706129 | 14706129 | + | 0        | 0        | -27.77546952 |
| chr18 | 14706130 | 14706130 | - | 7.77E-16 | 4.79E-14 | -25.89576001 |
| chr18 | 14706137 | 14706137 | + | 1.78E-15 | 1.06E-13 | -25.26324342 |
| chr18 | 14706138 | 14706138 | - | 0        | 0        | -28.68856193 |
| chr18 | 14706146 | 14706146 | + | 0        | 0        | -27.34098517 |
| chr18 | 14706147 | 14706147 | - | 0        | 0        | -27.7224736  |
| chr18 | 14706161 | 14706161 | - | 0        | 0        | -29.24175451 |
| chr18 | 14706167 | 14706167 | - | 0        | 0        | -30.23297679 |
| chr18 | 14782254 | 14782254 | + | 6.61E-08 | 1.67E-06 | -28.13966077 |
| chr18 | 15066508 | 15066508 | - | 0        | 0        | -32.53356908 |
| chr18 | 15066524 | 15066524 | - | 0        | 0        | -30.40506329 |
| chr18 | 20746760 | 20746760 | + | 0        | 0        | -26.54223685 |
| chr18 | 20746761 | 20746761 | - | 0        | 0        | -29.51913488 |
| chr18 | 20944545 | 20944545 | - | 3.22E-15 | 1.89E-13 | -30.78678206 |
| chr18 | 20944587 | 20944587 | + | 4.45E-14 | 2.34E-12 | -29.3275472  |
| chr18 | 20944588 | 20944588 | - | 1.32E-11 | 5.42E-10 | -27.46671787 |
| chr18 | 21651391 | 21651391 | + | 7.15E-10 | 2.40E-08 | -32.75585611 |
| chr18 | 21651509 | 21651509 | + | 0        | 0        | -27.02582739 |

|       |          |          |   |            |            |              |
|-------|----------|----------|---|------------|------------|--------------|
| chr18 | 21651510 | 21651510 | - | 0          | 0          | -27.98160701 |
| chr18 | 21842451 | 21842451 | + | 6.54E-05   | 0.00087289 | 40           |
| chr18 | 24651931 | 24651931 | - | 1.15E-13   | 5.84E-12   | -27.55791778 |
| chr18 | 24666116 | 24666116 | + | 0.00020029 | 0.00229444 | -42.70833333 |
| chr18 | 30224459 | 30224459 | + | 2.20E-05   | 0.000334   | -54.61538462 |
| chr18 | 32507138 | 32507138 | - | 1.30E-14   | 7.19E-13   | -30.4549406  |
| chr18 | 34547422 | 34547422 | - | 5.61E-07   | 1.21E-05   | -36.93524096 |
| chr18 | 34547436 | 34547436 | + | 0          | 0          | -34.34355929 |
| chr18 | 34547445 | 34547445 | + | 0          | 0          | -32.14699684 |
| chr18 | 34547457 | 34547457 | + | 0          | 0          | -43.50805531 |
| chr18 | 34547467 | 34547467 | + | 0          | 0          | -40.74435854 |
| chr18 | 34547474 | 34547474 | + | 0          | 0          | -36.56636597 |
| chr18 | 34547596 | 34547596 | - | 1.22E-10   | 4.49E-09   | -27.94217456 |
| chr18 | 34549349 | 34549349 | + | 1.69E-10   | 6.12E-09   | -26.5601829  |
| chr18 | 34549511 | 34549511 | + | 0          | 0          | -37.07533682 |
| chr18 | 34549512 | 34549512 | - | 0          | 0          | -36.05068322 |
| chr18 | 34549547 | 34549547 | + | 0          | 0          | -35.34026949 |
| chr18 | 34549548 | 34549548 | - | 0          | 0          | -30.22985161 |
| chr18 | 34549553 | 34549553 | + | 5.00E-05   | 0.00068962 | -25.08266415 |
| chr18 | 34549554 | 34549554 | - | 0          | 0          | -32.18437132 |
| chr18 | 34549584 | 34549584 | + | 3.40E-07   | 7.63E-06   | -31.31018383 |
| chr18 | 34883872 | 34883872 | + | 0.00024007 | 0.00267829 | -29.16666667 |
| chr18 | 35118001 | 35118001 | + | 3.80E-10   | 1.32E-08   | -28.88952764 |
| chr18 | 35823729 | 35823729 | + | 0          | 0          | -33.26911956 |
| chr18 | 35823730 | 35823730 | - | 3.22E-12   | 1.41E-10   | -34.18439716 |
| chr18 | 35823852 | 35823852 | - | 0          | 0          | -32.81613301 |
| chr18 | 35921080 | 35921080 | + | 0          | 0          | -52.59989053 |
| chr18 | 35921084 | 35921084 | + | 0          | 0          | -28.05825243 |
| chr18 | 35921088 | 35921088 | + | 0          | 0          | -43.13546423 |
| chr18 | 36021940 | 36021940 | + | 0.00021026 | 0.00239139 | -32.79220779 |
| chr18 | 36032516 | 36032516 | - | 3.29E-11   | 1.29E-09   | -53.56241507 |
| chr18 | 36032520 | 36032520 | - | 5.49E-05   | 0.00074861 | -31.54387969 |
| chr18 | 36032538 | 36032538 | - | 2.30E-07   | 5.33E-06   | -43.40376927 |
| chr18 | 36032553 | 36032553 | - | 1.72E-06   | 3.38E-05   | -40.42307692 |
| chr18 | 36284644 | 36284644 | - | 3.33E-16   | 2.11E-14   | -38.91607461 |
| chr18 | 36284724 | 36284724 | - | 0          | 0          | -36.23221628 |
| chr18 | 36324262 | 36324262 | + | 0          | 0          | -36.37765679 |
| chr18 | 36324266 | 36324266 | + | 0          | 0          | -34.21423144 |
| chr18 | 36324385 | 36324385 | + | 0          | 0          | -29.48506039 |
| chr18 | 36514385 | 36514385 | - | 0          | 0          | -25.69592423 |
| chr18 | 36514978 | 36514978 | + | 1.10E-06   | 2.24E-05   | -36.13636364 |

|       |          |          |   |            |            |              |
|-------|----------|----------|---|------------|------------|--------------|
| chr18 | 36696058 | 36696058 | - | 0.00030176 | 0.00325345 | -25.17741129 |
| chr18 | 36696070 | 36696070 | - | 6.62E-06   | 0.0001143  | -30.64030132 |
| chr18 | 36731081 | 36731081 | - | 0          | 0          | -25.29391685 |
| chr18 | 37721836 | 37721836 | + | 4.63E-07   | 1.01E-05   | -25.10995708 |
| chr18 | 37725973 | 37725973 | + | 3.28E-08   | 8.73E-07   | -25.49009684 |
| chr18 | 37743325 | 37743325 | + | 0.00078782 | 0.00725765 | 26.59323367  |
| chr18 | 37743352 | 37743352 | + | 0.00054286 | 0.00532928 | 37.32718894  |
| chr18 | 37766820 | 37766820 | + | 0          | 0          | -26.64092664 |
| chr18 | 37808525 | 37808525 | - | 7.64E-05   | 0.00099866 | -40.64039409 |
| chr18 | 37821848 | 37821848 | - | 6.47E-07   | 1.38E-05   | -40.94117647 |
| chr18 | 37822667 | 37822667 | + | 0.0001146  | 0.00141745 | -26.08695652 |
| chr18 | 37842432 | 37842432 | + | 0          | 0          | -57.39573148 |
| chr18 | 37842454 | 37842454 | + | 0          | 0          | -36.32142857 |
| chr18 | 37842621 | 37842621 | - | 0          | 0          | -43.88297872 |
| chr18 | 37842629 | 37842629 | + | 0          | 0          | -48.25133355 |
| chr18 | 37842630 | 37842630 | - | 0          | 0          | -42.27398316 |
| chr18 | 37842658 | 37842658 | + | 0          | 0          | -49.92231513 |
| chr18 | 37842659 | 37842659 | - | 0          | 0          | -48.66739232 |
| chr18 | 37842694 | 37842694 | + | 0          | 0          | -61.21693644 |
| chr18 | 37842695 | 37842695 | - | 0          | 0          | -43.0134103  |
| chr18 | 37842723 | 37842723 | + | 0          | 0          | -53.84615385 |
| chr18 | 37880050 | 37880050 | + | 2.37E-10   | 8.44E-09   | -31.47637795 |
| chr18 | 38283843 | 38283843 | + | 0.00011383 | 0.00140936 | -25.08090615 |
| chr18 | 38522005 | 38522005 | - | 1.76E-08   | 4.88E-07   | -34.39393939 |
| chr18 | 38542565 | 38542565 | - | 1.33E-09   | 4.31E-08   | -32.15133978 |
| chr18 | 38542576 | 38542576 | - | 6.82E-08   | 1.72E-06   | -28.40713814 |
| chr18 | 38568985 | 38568985 | + | 1.92E-07   | 4.51E-06   | -26.91776296 |
| chr18 | 38569013 | 38569013 | + | 4.13E-07   | 9.13E-06   | -26.02392171 |
| chr18 | 38570631 | 38570631 | + | 0          | 0          | -36.81102362 |
| chr18 | 38570666 | 38570666 | - | 0          | 0          | -25.38293828 |
| chr18 | 38570705 | 38570705 | + | 4.19E-06   | 7.57E-05   | -39.05462185 |
| chr18 | 38570706 | 38570706 | - | 9.96E-12   | 4.15E-10   | -36.70112782 |
| chr18 | 38570724 | 38570724 | + | 1.61E-05   | 0.00025381 | -36.37873754 |
| chr18 | 38570891 | 38570891 | - | 0          | 0          | -41.38491845 |
| chr18 | 38584249 | 38584249 | + | 0          | 0          | -29.15878278 |
| chr18 | 38584283 | 38584283 | + | 0          | 0          | -36.96779521 |
| chr18 | 38584284 | 38584284 | - | 0          | 0          | -41.33367176 |
| chr18 | 38584290 | 38584290 | + | 0          | 0          | -33.37972133 |
| chr18 | 38584291 | 38584291 | - | 0          | 0          | -35.21710943 |
| chr18 | 38584310 | 38584310 | + | 0          | 0          | -40.55254237 |
| chr18 | 38584311 | 38584311 | - | 0          | 0          | -34.60188934 |



|       |          |          |   |            |            |              |
|-------|----------|----------|---|------------|------------|--------------|
| chr18 | 38584337 | 38584337 | + | 4.44E-16   | 2.79E-14   | -33.84273504 |
| chr18 | 38584341 | 38584341 | + | 1.03E-13   | 5.25E-12   | -27.41595209 |
| chr18 | 38584445 | 38584445 | - | 0          | 0          | -33.38116715 |
| chr18 | 38602735 | 38602735 | - | 5.91E-14   | 3.08E-12   | -27.72871217 |
| chr18 | 38602739 | 38602739 | - | 0          | 0          | -44.5443893  |
| chr18 | 38703335 | 38703335 | + | 3.70E-08   | 9.77E-07   | -27.81570898 |
| chr18 | 38938124 | 38938124 | + | 1.21E-07   | 2.93E-06   | -28.40239913 |
| chr18 | 39095228 | 39095228 | - | 0          | 0          | -39.09026297 |
| chr18 | 39284333 | 39284333 | + | 0          | 0          | -34.77087455 |
| chr18 | 42267269 | 42267269 | - | 4.94E-07   | 1.08E-05   | 31.21212121  |
| chr18 | 42685951 | 42685951 | - | 0          | 0          | -29.68637523 |
| chr18 | 43843605 | 43843605 | - | 0.00061069 | 0.00587772 | -26.66666667 |
| chr18 | 45001380 | 45001380 | + | 1.83E-06   | 3.58E-05   | -25.88987764 |
| chr18 | 46199639 | 46199639 | + | 0          | 0          | -26.08405111 |
| chr18 | 46199640 | 46199640 | - | 0          | 0          | -31.63879283 |
| chr18 | 46199653 | 46199653 | - | 0          | 0          | -31.25029041 |
| chr18 | 46575139 | 46575139 | - | 0.00018504 | 0.00214431 | -26.6        |
| chr18 | 47321369 | 47321369 | + | 0          | 0          | -28.00126816 |
| chr18 | 47331304 | 47331304 | + | 0          | 0          | -29.89981423 |
| chr18 | 47432828 | 47432828 | + | 1.24E-06   | 2.50E-05   | -35.22328735 |
| chr18 | 47493898 | 47493898 | - | 4.59E-06   | 8.22E-05   | -31.26795977 |
| chr18 | 47703880 | 47703880 | + | 9.64E-14   | 4.92E-12   | -39.01422107 |
| chr18 | 47703881 | 47703881 | - | 5.41E-12   | 2.32E-10   | -35.53505027 |
| chr18 | 47703890 | 47703890 | + | 2.84E-09   | 8.80E-08   | -31.20595665 |
| chr18 | 49559423 | 49559423 | + | 0          | 0          | -25.31781944 |
| chr18 | 49559448 | 49559448 | + | 0          | 0          | -29.37955124 |
| chr18 | 49559449 | 49559449 | - | 0          | 0          | -28.19645884 |
| chr18 | 49559683 | 49559683 | - | 9.41E-06   | 0.00015674 | -32.67008221 |
| chr18 | 52753832 | 52753832 | + | 0          | 0          | -27.11406096 |
| chr18 | 52753853 | 52753853 | + | 8.66E-15   | 4.87E-13   | -26.07069258 |
| chr18 | 52753877 | 52753877 | + | 0          | 0          | -28.90617648 |
| chr18 | 53255910 | 53255910 | + | 0          | 0          | -26.31236572 |
| chr18 | 53255947 | 53255947 | - | 0          | 0          | -33.32942441 |
| chr18 | 53469591 | 53469591 | - | 0          | 0          | -32.79091171 |
| chr18 | 54611521 | 54611521 | + | 0          | 0          | -29.64642958 |
| chr18 | 54611601 | 54611601 | - | 0          | 0          | -37.07943925 |
| chr18 | 54758538 | 54758538 | + | 0          | 0          | -47.24627078 |
| chr18 | 54807555 | 54807555 | - | 0          | 0          | -32.43194125 |
| chr18 | 54828113 | 54828113 | - | 0          | 0          | -28.00862758 |
| chr18 | 54828137 | 54828137 | - | 0          | 0          | -26.7919525  |
| chr18 | 54828144 | 54828144 | - | 0          | 0          | -36.20809089 |

|       |          |          |   |          |            |              |
|-------|----------|----------|---|----------|------------|--------------|
| chr18 | 54911794 | 54911794 | + | 0        | 0          | -37.74263716 |
| chr18 | 54911842 | 54911842 | - | 0        | 0          | -27.84064875 |
| chr18 | 54911867 | 54911867 | - | 0        | 0          | -34.9984656  |
| chr18 | 54952487 | 54952487 | + | 0        | 0          | -25.1940881  |
| chr18 | 54953364 | 54953364 | - | 5.56E-12 | 2.38E-10   | -36.82692308 |
| chr18 | 54979247 | 54979247 | - | 0        | 0          | -28.30745746 |
| chr18 | 56676611 | 56676611 | - | 1.46E-11 | 5.97E-10   | -31.97247706 |
| chr18 | 56676651 | 56676651 | + | 1.85E-11 | 7.50E-10   | -25.50352186 |
| chr18 | 56676686 | 56676686 | + | 7.17E-13 | 3.36E-11   | -26.94372294 |
| chr18 | 56676687 | 56676687 | - | 0        | 0          | -27.22142371 |
| chr18 | 56678656 | 56678656 | - | 0        | 0          | -26.72359018 |
| chr18 | 57747428 | 57747428 | + | 0        | 0          | -33.68372189 |
| chr18 | 57747429 | 57747429 | - | 0        | 0          | -32.93309348 |
| chr18 | 57747473 | 57747473 | - | 0        | 0          | -26.42432952 |
| chr18 | 60610166 | 60610166 | - | 0        | 0          | -27.75671526 |
| chr18 | 60613544 | 60613544 | - | 0        | 0          | -40.60030955 |
| chr18 | 60613557 | 60613557 | + | 1.02E-14 | 5.70E-13   | -36.94329875 |
| chr18 | 60613558 | 60613558 | - | 0        | 0          | -42.03255723 |
| chr18 | 60735485 | 60735485 | + | 0        | 0          | -30.0775815  |
| chr18 | 60735620 | 60735620 | + | 0        | 0          | -25.53744456 |
| chr18 | 60735636 | 60735636 | + | 0        | 0          | -27.7354092  |
| chr18 | 60901326 | 60901326 | - | 0        | 0          | -32.33836839 |
| chr18 | 60912347 | 60912347 | + | 3.47E-12 | 1.52E-10   | -30.76097072 |
| chr18 | 60912423 | 60912423 | - | 0        | 0          | -40.20166559 |
| chr18 | 60912440 | 60912440 | - | 0        | 0          | -28.74436463 |
| chr18 | 60912465 | 60912465 | + | 0        | 0          | -25.46916603 |
| chr18 | 60912482 | 60912482 | + | 0        | 0          | -32.86401458 |
| chr18 | 60925534 | 60925534 | + | 0        | 0          | -26.73243632 |
| chr18 | 60925542 | 60925542 | + | 0        | 0          | -37.06026355 |
| chr18 | 60925553 | 60925553 | + | 0        | 0          | -42.9786195  |
| chr18 | 60925647 | 60925647 | - | 0        | 0          | -41.09490618 |
| chr18 | 60925659 | 60925659 | - | 0        | 0          | -39.1203092  |
| chr18 | 60926417 | 60926417 | - | 6.95E-06 | 0.00011941 | -39.35532234 |
| chr18 | 60950735 | 60950735 | - | 8.62E-12 | 3.61E-10   | -28.75615764 |
| chr18 | 60950765 | 60950765 | - | 0        | 0          | -35.6123348  |
| chr18 | 60950785 | 60950785 | - | 1.27E-11 | 5.23E-10   | -27.01870652 |
| chr18 | 60972274 | 60972274 | - | 3.14E-05 | 0.00045842 | -41.2987013  |
| chr18 | 60977862 | 60977862 | - | 8.99E-15 | 5.05E-13   | -27.33702875 |
| chr18 | 60977867 | 60977867 | - | 0        | 0          | -33.30396476 |
| chr18 | 60978267 | 60978267 | - | 1.30E-14 | 7.19E-13   | -28.53216053 |
| chr18 | 61011769 | 61011769 | + | 0        | 0          | -25.54577402 |

|       |          |          |   |            |            |              |
|-------|----------|----------|---|------------|------------|--------------|
| chr18 | 61011842 | 61011842 | - | 0          | 0          | -26.67883059 |
| chr18 | 61015198 | 61015198 | - | 3.27E-07   | 7.36E-06   | -26.98836614 |
| chr18 | 61035764 | 61035764 | + | 5.90E-14   | 3.07E-12   | -42.29427041 |
| chr18 | 61035782 | 61035782 | + | 7.01E-14   | 3.62E-12   | -41.20523163 |
| chr18 | 61035783 | 61035783 | - | 3.84E-13   | 1.85E-11   | -35.95196336 |
| chr18 | 61035794 | 61035794 | - | 1.52E-10   | 5.53E-09   | -29.72373649 |
| chr18 | 61035854 | 61035854 | + | 1.71E-07   | 4.04E-06   | -29.04234157 |
| chr18 | 61035855 | 61035855 | - | 1.32E-08   | 3.73E-07   | -28.70316159 |
| chr18 | 61035868 | 61035868 | + | 2.31E-09   | 7.24E-08   | -36.74345959 |
| chr18 | 61035869 | 61035869 | - | 5.25E-08   | 1.35E-06   | -34.80284421 |
| chr18 | 61035920 | 61035920 | + | 0          | 0          | -37.83747064 |
| chr18 | 61035921 | 61035921 | - | 0          | 0          | -37.09679246 |
| chr18 | 61035932 | 61035932 | + | 0          | 0          | -39.48096977 |
| chr18 | 61035933 | 61035933 | - | 0          | 0          | -37.88162472 |
| chr18 | 61035960 | 61035960 | - | 0          | 0          | -34.58541227 |
| chr18 | 61035974 | 61035974 | + | 0          | 0          | -29.69763978 |
| chr18 | 61035975 | 61035975 | - | 0          | 0          | -32.88854003 |
| chr18 | 61035983 | 61035983 | + | 0          | 0          | -32.11484297 |
| chr18 | 61035984 | 61035984 | - | 0          | 0          | -29.93331407 |
| chr18 | 61036028 | 61036028 | + | 0          | 0          | -26.64402296 |
| chr18 | 61036178 | 61036178 | + | 0          | 0          | -33.49986333 |
| chr18 | 61036374 | 61036374 | - | 0          | 0          | -29.16906946 |
| chr18 | 61036383 | 61036383 | - | 0          | 0          | -25.440759   |
| chr18 | 61036421 | 61036421 | + | 2.07E-10   | 7.43E-09   | -31.14130435 |
| chr18 | 61041384 | 61041384 | - | 1.94E-05   | 0.00029919 | -39.03276956 |
| chr18 | 61042588 | 61042588 | - | 3.31E-06   | 6.12E-05   | -37.74509804 |
| chr18 | 61044906 | 61044906 | - | 9.44E-05   | 0.00119926 | -26.14754098 |
| chr18 | 61065774 | 61065774 | + | 0          | 0          | -26.85698268 |
| chr18 | 61065780 | 61065780 | + | 0          | 0          | -30.22584906 |
| chr18 | 61065784 | 61065784 | + | 0          | 0          | -27.0752885  |
| chr18 | 61065789 | 61065789 | + | 0          | 0          | -36.62994874 |
| chr18 | 61065800 | 61065800 | + | 0          | 0          | -27.43588792 |
| chr18 | 61065812 | 61065812 | - | 0          | 0          | -25.40996998 |
| chr18 | 61065906 | 61065906 | + | 1.25E-08   | 3.53E-07   | -29.2022792  |
| chr18 | 61294485 | 61294485 | + | 5.77E-08   | 1.48E-06   | -50.12315271 |
| chr18 | 61454907 | 61454907 | - | 0.0009433  | 0.00841712 | -39.68253968 |
| chr18 | 61652383 | 61652383 | + | 2.27E-08   | 6.19E-07   | -34.66288385 |
| chr18 | 61759966 | 61759966 | + | 0.00049167 | 0.00490518 | -31.17630141 |
| chr18 | 61766405 | 61766405 | - | 0          | 0          | -26.10955658 |
| chr18 | 61783764 | 61783764 | + | 0          | 0          | -36.76695311 |
| chr18 | 61783933 | 61783933 | - | 6.09E-06   | 0.00010606 | -29.32773109 |

|       |          |          |   |            |            |              |
|-------|----------|----------|---|------------|------------|--------------|
| chr18 | 62047039 | 62047039 | + | 0.00090657 | 0.00814882 | -25.72327044 |
| chr18 | 64493639 | 64493639 | + | 0          | 0          | -26.82679739 |
| chr18 | 64493670 | 64493670 | + | 0          | 0          | -29.24431439 |
| chr18 | 64493671 | 64493671 | - | 0          | 0          | -30.18732846 |
| chr18 | 64493672 | 64493672 | + | 0          | 0          | -25.10944584 |
| chr18 | 64551625 | 64551625 | + | 1.98E-10   | 7.13E-09   | -39.52065273 |
| chr18 | 64551853 | 64551853 | - | 0.00053627 | 0.00527603 | -47.3354232  |
| chr18 | 64911840 | 64911840 | + | 0          | 0          | -32.56886805 |
| chr18 | 64911841 | 64911841 | - | 0          | 0          | -31.46601747 |
| chr18 | 64911882 | 64911882 | + | 5.55E-16   | 3.46E-14   | -26.3011768  |
| chr18 | 64911883 | 64911883 | - | 0          | 0          | -26.77111657 |
| chr18 | 64911912 | 64911912 | + | 0          | 0          | -28.08377533 |
| chr18 | 64911913 | 64911913 | - | 0          | 0          | -28.19304649 |
| chr18 | 64911924 | 64911924 | - | 0          | 0          | -26.70863348 |
| chr18 | 64933369 | 64933369 | + | 0          | 0          | -38.05884137 |
| chr18 | 64933558 | 64933558 | - | 5.39E-06   | 9.49E-05   | -29.86533282 |
| chr18 | 64954502 | 64954502 | - | 0.00012823 | 0.00156302 | -39.28571429 |
| chr18 | 64959464 | 64959464 | - | 4.44E-07   | 9.75E-06   | -31.70731707 |
| chr18 | 65347747 | 65347747 | - | 0          | 0          | -25.70599555 |
| chr18 | 65497896 | 65497896 | - | 0          | 0          | -38.20579406 |
| chr18 | 65704069 | 65704069 | + | 1.04E-09   | 3.42E-08   | -31.19394292 |
| chr18 | 65704223 | 65704223 | - | 0          | 0          | -28.24318102 |
| chr18 | 65938316 | 65938316 | - | 0.00010667 | 0.00133303 | -29.82758621 |
| chr18 | 66461322 | 66461322 | - | 3.74E-07   | 8.33E-06   | -31.95666341 |
| chr18 | 66475785 | 66475785 | + | 1.21E-12   | 5.56E-11   | -40.1119403  |
| chr18 | 66475797 | 66475797 | + | 1.63E-10   | 5.91E-09   | -35.05291005 |
| chr18 | 66475815 | 66475815 | + | 7.53E-13   | 3.52E-11   | -40.49234864 |
| chr18 | 66514808 | 66514808 | - | 3.92E-14   | 2.07E-12   | -41.68742217 |
| chr18 | 66514853 | 66514853 | + | 0          | 0          | -28.18698385 |
| chr18 | 67312345 | 67312345 | + | 2.22E-13   | 1.10E-11   | -25.53205536 |
| chr18 | 67346036 | 67346036 | + | 2.72E-13   | 1.33E-11   | -25.50901687 |
| chr18 | 67391693 | 67391693 | + | 0          | 0          | -33.42414372 |
| chr18 | 67391694 | 67391694 | - | 0          | 0          | -28.19083472 |
| chr18 | 67977657 | 67977657 | + | 4.41E-08   | 1.15E-06   | -30.7746085  |
| chr18 | 69198038 | 69198038 | + | 7.51E-14   | 3.87E-12   | -30.05580029 |
| chr18 | 69198102 | 69198102 | + | 0          | 0          | -28.68765182 |
| chr18 | 69198103 | 69198103 | - | 0          | 0          | -35.71005073 |
| chr18 | 69198109 | 69198109 | + | 0          | 0          | -25.9765217  |
| chr18 | 69563690 | 69563690 | + | 6.10E-07   | 1.31E-05   | -37.38926524 |
| chr18 | 69563691 | 69563691 | - | 3.63E-08   | 9.59E-07   | -43.35515548 |
| chr18 | 69563736 | 69563736 | + | 3.68E-08   | 9.71E-07   | -36.02564103 |

|       |          |          |   |            |            |              |
|-------|----------|----------|---|------------|------------|--------------|
| chr18 | 69613736 | 69613736 | + | 0          | 0          | -34.82577401 |
| chr18 | 69614040 | 69614040 | + | 0          | 0          | -29.8718039  |
| chr18 | 69722890 | 69722890 | + | 0          | 0          | -28.61585866 |
| chr18 | 69794273 | 69794273 | - | 0          | 0          | -28.54606074 |
| chr18 | 70471689 | 70471689 | - | 0          | 0          | -34.81755683 |
| chr18 | 73217039 | 73217039 | - | 2.33E-15   | 1.38E-13   | -30.78515687 |
| chr18 | 73701988 | 73701988 | - | 0          | 0          | -28.27300141 |
| chr18 | 73735132 | 73735132 | + | 0          | 0          | -25.68588548 |
| chr18 | 73735262 | 73735262 | - | 0          | 0          | -31.95746528 |
| chr18 | 74008412 | 74008412 | - | 0          | 0          | -30.10675678 |
| chr18 | 74008435 | 74008435 | + | 8.56E-05   | 0.00110226 | -30.12477718 |
| chr18 | 74994403 | 74994403 | + | 3.32E-07   | 7.47E-06   | -27.28565016 |
| chr18 | 75047456 | 75047456 | - | 0          | 0          | -38.01663112 |
| chr18 | 75248969 | 75248969 | - | 1.11E-16   | 7.26E-15   | -30.62359865 |
| chr18 | 75307427 | 75307427 | + | 0          | 0          | -41.53086906 |
| chr18 | 75307533 | 75307533 | - | 9.72E-13   | 4.49E-11   | -60.92488378 |
| chr18 | 75307535 | 75307535 | - | 1.21E-06   | 2.44E-05   | -38.52459016 |
| chr18 | 75307537 | 75307537 | - | 1.30E-12   | 5.95E-11   | -59.48930297 |
| chr18 | 75307548 | 75307548 | - | 2.35E-10   | 8.37E-09   | -53.13092979 |
| chr18 | 75307577 | 75307577 | + | 0          | 0          | -40.26006512 |
| chr18 | 75307585 | 75307585 | + | 0          | 0          | -32.73170732 |
| chr18 | 75307586 | 75307586 | - | 0          | 0          | -39.94253195 |
| chr18 | 75307599 | 75307599 | + | 0          | 0          | -48.2400971  |
| chr18 | 75307600 | 75307600 | - | 0          | 0          | -45.78702868 |
| chr18 | 75307620 | 75307620 | + | 0          | 0          | -54.18421358 |
| chr18 | 75307621 | 75307621 | - | 0          | 0          | -38.21078431 |
| chr18 | 75307638 | 75307638 | + | 0          | 0          | -48.02901986 |
| chr18 | 75307641 | 75307641 | + | 0          | 0          | -44.01281461 |
| chr18 | 75307649 | 75307649 | + | 0          | 0          | -39.60079143 |
| chr18 | 75307670 | 75307670 | + | 0          | 0          | -53.10388342 |
| chr18 | 75307749 | 75307749 | - | 0          | 0          | -44.91372913 |
| chr18 | 75307766 | 75307766 | - | 0          | 0          | -40.42377545 |
| chr18 | 75307791 | 75307791 | + | 0.00038631 | 0.00400626 | -27.90811339 |
| chr18 | 75307792 | 75307792 | - | 0          | 0          | -32.48514596 |
| chr18 | 75307803 | 75307803 | + | 7.34E-10   | 2.46E-08   | -52.98142717 |
| chr18 | 75325687 | 75325687 | + | 0          | 0          | -27.32103257 |
| chr18 | 75332418 | 75332418 | + | 0          | 0          | -37.17877314 |
| chr18 | 75332429 | 75332429 | + | 0          | 0          | -41.64918074 |
| chr18 | 75332526 | 75332526 | - | 0          | 0          | -43.89749474 |
| chr18 | 75332546 | 75332546 | + | 0          | 0          | -44.39372509 |
| chr18 | 75332547 | 75332547 | - | 0          | 0          | -39.01967636 |

|       |          |          |   |            |            |              |
|-------|----------|----------|---|------------|------------|--------------|
| chr18 | 75332562 | 75332562 | + | 2.33E-08   | 6.34E-07   | -29.45704248 |
| chr18 | 75344798 | 75344798 | + | 0          | 0          | -42.9786998  |
| chr18 | 75361039 | 75361039 | - | 1.04E-13   | 5.28E-12   | -26.5433881  |
| chr18 | 75372786 | 75372786 | + | 0          | 0          | -35.37838093 |
| chr18 | 75372963 | 75372963 | + | 0          | 0          | -36.9926176  |
| chr18 | 75372964 | 75372964 | - | 1.79E-12   | 8.05E-11   | -46.84974435 |
| chr18 | 75379529 | 75379529 | - | 0          | 0          | -27.04868401 |
| chr18 | 75386128 | 75386128 | + | 0          | 0          | -27.00240923 |
| chr18 | 75398493 | 75398493 | - | 0          | 0          | -30.66844256 |
| chr18 | 75435053 | 75435053 | + | 0          | 0          | -58.62138365 |
| chr18 | 75435060 | 75435060 | + | 9.52E-11   | 3.55E-09   | -33.69937888 |
| chr18 | 75435278 | 75435278 | - | 4.26E-06   | 7.69E-05   | -33.71428571 |
| chr18 | 75462586 | 75462586 | - | 0          | 0          | -27.37907762 |
| chr18 | 75472041 | 75472041 | - | 5.03E-08   | 1.30E-06   | -38.80327869 |
| chr18 | 75494389 | 75494389 | + | 0          | 0          | -27.08396515 |
| chr18 | 75500542 | 75500542 | + | 0          | 0          | -25.4362664  |
| chr18 | 75566537 | 75566537 | - | 1.53E-05   | 0.00024226 | -40.53639847 |
| chr18 | 75839157 | 75839157 | + | 3.44E-05   | 0.00049644 | 37.9286927   |
| chr18 | 75900124 | 75900124 | - | 9.47E-11   | 3.53E-09   | -30.13923014 |
| chr18 | 76051738 | 76051738 | + | 0          | 0          | -26.85618729 |
| chr18 | 76055087 | 76055087 | + | 1.15E-11   | 4.74E-10   | -34.04361654 |
| chr18 | 76055352 | 76055352 | - | 4.01E-10   | 1.39E-08   | -27.7855292  |
| chr18 | 76057802 | 76057802 | - | 0          | 0          | -31.79628498 |
| chr18 | 76145907 | 76145907 | + | 0          | 0          | -25.86298814 |
| chr18 | 76146049 | 76146049 | + | 1.90E-10   | 6.85E-09   | -40.50287155 |
| chr18 | 76146062 | 76146062 | + | 1.03E-05   | 0.00016958 | -27.86501377 |
| chr18 | 76146249 | 76146249 | - | 2.44E-12   | 1.08E-10   | -31.37181409 |
| chr18 | 76146260 | 76146260 | - | 5.45E-12   | 2.33E-10   | -25.41493387 |
| chr18 | 76933006 | 76933006 | - | 2.73E-09   | 8.48E-08   | -29.19479152 |
| chr18 | 77186115 | 77186115 | + | 1.22E-15   | 7.41E-14   | -28.3899872  |
| chr18 | 77597467 | 77597467 | + | 0.00069885 | 0.00657177 | -25.24826216 |
| chr18 | 77597699 | 77597699 | - | 1.91E-08   | 5.26E-07   | -26.91975469 |
| chr18 | 77603396 | 77603396 | + | 4.47E-05   | 0.00062604 | -34.61538462 |
| chr18 | 77605767 | 77605767 | + | 0          | 0          | -35.84380821 |
| chr18 | 77794169 | 77794169 | - | 5.66E-15   | 3.24E-13   | -36.93634639 |
| chr18 | 77795409 | 77795409 | - | 0          | 0          | -28.92958372 |
| chr18 | 78046946 | 78046946 | + | 0          | 0          | -35.83723864 |
| chr18 | 78340073 | 78340073 | - | 0          | 0          | -31.0259705  |
| chr18 | 80129351 | 80129351 | + | 0          | 0          | -37.56054848 |
| chr18 | 80129451 | 80129451 | - | 7.77E-16   | 4.79E-14   | -28.83402009 |
| chr18 | 80169944 | 80169944 | - | 0.00058812 | 0.00569712 | -28.67424242 |

|       |          |          |   |            |            |              |
|-------|----------|----------|---|------------|------------|--------------|
| chr18 | 80604099 | 80604099 | - | 5.55E-16   | 3.46E-14   | -33.20866142 |
| chr18 | 80604134 | 80604134 | - | 2.02E-14   | 1.10E-12   | -30.57086614 |
| chr18 | 80613869 | 80613869 | + | 3.11E-11   | 1.22E-09   | -25.06499735 |
| chr18 | 80613926 | 80613926 | - | 0          | 0          | -31.94993249 |
| chr18 | 80613944 | 80613944 | - | 0          | 0          | -29.52443609 |
| chr18 | 80640512 | 80640512 | + | 5.75E-07   | 1.24E-05   | -31.7721519  |
| chr18 | 80640555 | 80640555 | + | 4.35E-06   | 7.83E-05   | -30.87542088 |
| chr18 | 80684270 | 80684270 | + | 1.57E-09   | 5.03E-08   | -26.82564813 |
| chr18 | 81399205 | 81399205 | - | 0.00036937 | 0.00385893 | -38.12636166 |
| chr18 | 81399210 | 81399210 | - | 8.16E-06   | 0.00013779 | -49.23747277 |
| chr18 | 81510468 | 81510468 | + | 7.61E-07   | 1.60E-05   | -29.61936241 |
| chr18 | 81510482 | 81510482 | + | 1.11E-06   | 2.26E-05   | -28.95756941 |
| chr18 | 81510654 | 81510654 | - | 5.66E-12   | 2.42E-10   | -25.85476245 |
| chr18 | 81526142 | 81526142 | + | 0.00055259 | 0.00540882 | -25.78595318 |
| chr18 | 81834184 | 81834184 | + | 0.00102732 | 0.00902864 | -28.08441558 |
| chr18 | 82474821 | 82474821 | + | 0          | 0          | -34.95395802 |
| chr18 | 82474822 | 82474822 | - | 2.10E-11   | 8.44E-10   | -30.15379712 |
| chr18 | 82474836 | 82474836 | + | 0          | 0          | -37.09602711 |
| chr18 | 82474848 | 82474848 | + | 0          | 0          | -42.14660974 |
| chr18 | 82536254 | 82536254 | - | 0.00062744 | 0.0060112  | -29.73684211 |
| chr18 | 82559120 | 82559120 | - | 2.36E-14   | 1.28E-12   | -26.43713995 |
| chr18 | 82559122 | 82559122 | - | 2.21E-14   | 1.20E-12   | -26.02235942 |
| chr18 | 82575558 | 82575558 | + | 8.29E-07   | 1.73E-05   | -26.57695542 |
| chr18 | 82753636 | 82753636 | + | 0          | 0          | -28.21439775 |
| chr18 | 82753646 | 82753646 | + | 0          | 0          | -29.81314904 |
| chr18 | 82753696 | 82753696 | - | 0          | 0          | -38.7185118  |
| chr18 | 82811659 | 82811659 | + | 2.72E-05   | 0.00040397 | -29.84330484 |
| chr18 | 82828039 | 82828039 | - | 0          | 0          | -45.92245667 |
| chr18 | 82872559 | 82872559 | + | 1.37E-13   | 6.87E-12   | -29.26938224 |
| chr18 | 82876171 | 82876171 | + | 1.19E-07   | 2.90E-06   | -26.77801724 |
| chr18 | 82916396 | 82916396 | + | 2.49E-14   | 1.34E-12   | -27.61357702 |
| chr18 | 82921941 | 82921941 | + | 1.02E-10   | 3.78E-09   | -26.20513133 |
| chr18 | 82921942 | 82921942 | - | 0          | 0          | -27.44040653 |
| chr18 | 83183917 | 83183917 | - | 0.00034318 | 0.003627   | -28.23588206 |
| chr18 | 83186048 | 83186048 | + | 1.23E-11   | 5.06E-10   | -25.25       |
| chr18 | 83360369 | 83360369 | + | 4.44E-06   | 7.97E-05   | -40.15376984 |
| chr18 | 83360381 | 83360381 | + | 1.41E-06   | 2.81E-05   | -41.61706349 |
| chr18 | 83363203 | 83363203 | + | 0          | 0          | -27.21130907 |
| chr18 | 84073532 | 84073532 | + | 6.86E-11   | 2.60E-09   | -27.06422985 |
| chr18 | 84090027 | 84090027 | + | 0          | 0          | -29.94745592 |
| chr18 | 84090041 | 84090041 | + | 0          | 0          | -27.50954613 |

|       |          |          |   |            |            |              |
|-------|----------|----------|---|------------|------------|--------------|
| chr18 | 84090072 | 84090072 | + | 0          | 0          | -34.75622682 |
| chr18 | 84090073 | 84090073 | - | 0          | 0          | -37.9646936  |
| chr18 | 84090107 | 84090107 | - | 0          | 0          | -28.76274661 |
| chr18 | 84264158 | 84264158 | - | 2.49E-06   | 4.74E-05   | -27.64876633 |
| chr18 | 84407463 | 84407463 | + | 5.91E-05   | 0.00079936 | -26.59736308 |
| chr18 | 84708406 | 84708406 | + | 4.82E-09   | 1.45E-07   | -25.23076923 |
| chr18 | 84708443 | 84708443 | + | 0          | 0          | -37.67271251 |
| chr18 | 84712548 | 84712548 | + | 0.00067098 | 0.00635673 | 33.33333333  |
| chr18 | 88409909 | 88409909 | - | 9.97E-05   | 0.00125838 | 29.62962963  |
| chr19 | 3307730  | 3307730  | + | 2.58E-10   | 9.14E-09   | -30.96242716 |
| chr19 | 3687534  | 3687534  | - | 4.43E-14   | 2.33E-12   | -27.72108844 |
| chr19 | 3687820  | 3687820  | - | 7.04E-09   | 2.07E-07   | -41.24452783 |
| chr19 | 3738706  | 3738706  | - | 1.05E-05   | 0.00017269 | 27.35042735  |
| chr19 | 3852920  | 3852920  | + | 0.00024218 | 0.00269851 | -30.89330025 |
| chr19 | 3943451  | 3943451  | + | 0          | 0          | -41.79535834 |
| chr19 | 3943459  | 3943459  | + | 0          | 0          | -32.81652328 |
| chr19 | 4151583  | 4151583  | - | 0.00110495 | 0.0095794  | -25.13788099 |
| chr19 | 4156974  | 4156974  | + | 2.11E-07   | 4.91E-06   | -51.51515152 |
| chr19 | 4173319  | 4173319  | - | 2.65E-14   | 1.43E-12   | -37.89760873 |
| chr19 | 4175387  | 4175387  | + | 0          | 0          | -33.49980314 |
| chr19 | 4175526  | 4175526  | - | 0          | 0          | -29.85288496 |
| chr19 | 4191501  | 4191501  | - | 0.00068662 | 0.00647876 | -30.91168091 |
| chr19 | 4217401  | 4217401  | + | 2.58E-11   | 1.03E-09   | -29.8420526  |
| chr19 | 4217553  | 4217553  | - | 6.59E-07   | 1.40E-05   | -26.9470405  |
| chr19 | 4217598  | 4217598  | - | 1.66E-10   | 6.02E-09   | -30.03432117 |
| chr19 | 4217886  | 4217886  | - | 6.31E-07   | 1.35E-05   | -30.37863421 |
| chr19 | 4257978  | 4257978  | - | 3.22E-15   | 1.89E-13   | -43.82352941 |
| chr19 | 4263945  | 4263945  | - | 0          | 0          | -34.84643094 |
| chr19 | 4263966  | 4263966  | - | 0          | 0          | -25.49158525 |
| chr19 | 4298867  | 4298867  | + | 0          | 0          | -33.99360588 |
| chr19 | 4298882  | 4298882  | + | 0          | 0          | -36.96193589 |
| chr19 | 4298883  | 4298883  | - | 0          | 0          | -36.09331313 |
| chr19 | 4618399  | 4618399  | - | 0          | 0          | -26.27764128 |
| chr19 | 4618415  | 4618415  | - | 0          | 0          | -31.69544355 |
| chr19 | 4711324  | 4711324  | + | 0          | 0          | -26.82663589 |
| chr19 | 4711328  | 4711328  | + | 0          | 0          | -31.9585599  |
| chr19 | 4720716  | 4720716  | + | 0          | 0          | -34.70633105 |
| chr19 | 4720816  | 4720816  | - | 0          | 0          | -35.70202061 |
| chr19 | 4720860  | 4720860  | - | 0          | 0          | -30.80155139 |
| chr19 | 4785455  | 4785455  | - | 5.46E-11   | 2.09E-09   | -31.94727105 |
| chr19 | 5052053  | 5052053  | + | 0          | 0          | -29.74401678 |



|       |         |         |   |            |            |              |
|-------|---------|---------|---|------------|------------|--------------|
| chr19 | 5052118 | 5052118 | + | 0          | 0          | -27.37582323 |
| chr19 | 5052964 | 5052964 | + | 0          | 0          | -28.98192991 |
| chr19 | 5052965 | 5052965 | - | 0          | 0          | -28.66011533 |
| chr19 | 5054018 | 5054018 | - | 3.53E-06   | 6.49E-05   | -28.19548872 |
| chr19 | 5058137 | 5058137 | + | 0          | 0          | -33.33493205 |
| chr19 | 5058138 | 5058138 | - | 0          | 0          | -28.59288879 |
| chr19 | 5058241 | 5058241 | - | 0          | 0          | -25.7763581  |
| chr19 | 5058284 | 5058284 | - | 0          | 0          | -33.49001942 |
| chr19 | 5068648 | 5068648 | - | 0          | 0          | -31.31519274 |
| chr19 | 5071268 | 5071268 | + | 0          | 0          | -28.17257873 |
| chr19 | 5071403 | 5071403 | - | 2.97E-06   | 5.56E-05   | -33.94620361 |
| chr19 | 5081841 | 5081841 | + | 0.00016341 | 0.00192718 | -25.63115105 |
| chr19 | 5082156 | 5082156 | + | 1.59E-06   | 3.15E-05   | -30.48005409 |
| chr19 | 5082378 | 5082378 | - | 1.38E-09   | 4.47E-08   | -27.02702703 |
| chr19 | 5110257 | 5110257 | + | 4.44E-16   | 2.79E-14   | -25.94181009 |
| chr19 | 5298295 | 5298295 | + | 0          | 0          | -38.03681075 |
| chr19 | 5298299 | 5298299 | + | 0          | 0          | -45.58933117 |
| chr19 | 5298302 | 5298302 | + | 0          | 0          | -28.09472171 |
| chr19 | 5298398 | 5298398 | - | 0          | 0          | -29.42141111 |
| chr19 | 5298458 | 5298458 | + | 0          | 0          | -31.1069865  |
| chr19 | 5464430 | 5464430 | + | 5.07E-10   | 1.74E-08   | -30.15911283 |
| chr19 | 5475142 | 5475142 | - | 0          | 0          | -26.21793768 |
| chr19 | 5660385 | 5660385 | + | 0.00029821 | 0.00322132 | -35.55555556 |
| chr19 | 5660417 | 5660417 | + | 3.09E-05   | 0.00045121 | -32.59596617 |
| chr19 | 5728701 | 5728701 | - | 1.01E-05   | 0.00016635 | -33.24845886 |
| chr19 | 5745516 | 5745516 | - | 0          | 0          | -27.31660232 |
| chr19 | 5745591 | 5745591 | + | 0          | 0          | -31.34655479 |
| chr19 | 5745611 | 5745611 | + | 0          | 0          | -38.10157477 |
| chr19 | 5745658 | 5745658 | - | 0          | 0          | -54.31808189 |
| chr19 | 5745667 | 5745667 | - | 0          | 0          | -48.31656851 |
| chr19 | 5745669 | 5745669 | - | 0          | 0          | -38.45273273 |
| chr19 | 5745682 | 5745682 | - | 0          | 0          | -42.40086769 |
| chr19 | 5745694 | 5745694 | - | 0          | 0          | -31.39196663 |
| chr19 | 5745698 | 5745698 | + | 0          | 0          | -43.37110135 |
| chr19 | 5745762 | 5745762 | - | 0          | 0          | -49.69523749 |
| chr19 | 5745782 | 5745782 | - | 0          | 0          | -43.74346722 |
| chr19 | 5745808 | 5745808 | + | 0          | 0          | -43.82300764 |
| chr19 | 5745809 | 5745809 | - | 0          | 0          | -44.90149538 |
| chr19 | 5745825 | 5745825 | + | 0          | 0          | -46.8158163  |
| chr19 | 5745826 | 5745826 | - | 0          | 0          | -47.26967663 |
| chr19 | 5745835 | 5745835 | + | 0          | 0          | -38.50099847 |

|       |         |         |   |   |   |              |
|-------|---------|---------|---|---|---|--------------|
| chr19 | 5745836 | 5745836 | - | 0 | 0 | -50.55632038 |
| chr19 | 5745837 | 5745837 | + | 0 | 0 | -28.12699595 |
| chr19 | 5745838 | 5745838 | - | 0 | 0 | -32.02838949 |
| chr19 | 5745850 | 5745850 | - | 0 | 0 | -37.36401076 |
| chr19 | 5751035 | 5751035 | - | 0 | 0 | -28.16591572 |
| chr19 | 5751206 | 5751206 | + | 0 | 0 | -27.58247409 |
| chr19 | 5751207 | 5751207 | - | 0 | 0 | -35.04765843 |
| chr19 | 5751300 | 5751300 | - | 0 | 0 | -30.64334766 |
| chr19 | 5751332 | 5751332 | - | 0 | 0 | -36.30738578 |
| chr19 | 5756651 | 5756651 | + | 0 | 0 | -55.5761259  |
| chr19 | 5756657 | 5756657 | + | 0 | 0 | -59.20075727 |
| chr19 | 5756687 | 5756687 | + | 0 | 0 | -54.08486892 |
| chr19 | 5756688 | 5756688 | - | 0 | 0 | -52.51849907 |
| chr19 | 5756709 | 5756709 | - | 0 | 0 | -45.23745245 |
| chr19 | 5756736 | 5756736 | + | 0 | 0 | -35.57571306 |
| chr19 | 5756737 | 5756737 | - | 0 | 0 | -37.86766655 |
| chr19 | 5756760 | 5756760 | + | 0 | 0 | -43.14557272 |
| chr19 | 5756832 | 5756832 | - | 0 | 0 | -50.49278248 |
| chr19 | 5756851 | 5756851 | - | 0 | 0 | -45.89839243 |
| chr19 | 5756856 | 5756856 | - | 0 | 0 | -52.7894559  |
| chr19 | 5756863 | 5756863 | - | 0 | 0 | -51.50552531 |
| chr19 | 5756876 | 5756876 | - | 0 | 0 | -50.78037078 |
| chr19 | 5756879 | 5756879 | - | 0 | 0 | -54.1899669  |
| chr19 | 5756881 | 5756881 | + | 0 | 0 | -41.18103546 |
| chr19 | 5756882 | 5756882 | - | 0 | 0 | -41.99226254 |
| chr19 | 5756897 | 5756897 | + | 0 | 0 | -52.92286115 |
| chr19 | 5756898 | 5756898 | - | 0 | 0 | -54.04696182 |
| chr19 | 5756904 | 5756904 | + | 0 | 0 | -56.77991607 |
| chr19 | 5756905 | 5756905 | - | 0 | 0 | -57.78944182 |
| chr19 | 5756921 | 5756921 | - | 0 | 0 | -46.88284196 |
| chr19 | 5757037 | 5757037 | - | 0 | 0 | -36.27839482 |
| chr19 | 5757056 | 5757056 | + | 0 | 0 | -59.17546506 |
| chr19 | 5757057 | 5757057 | - | 0 | 0 | -54.8582996  |
| chr19 | 5757067 | 5757067 | + | 0 | 0 | -60.78431373 |
| chr19 | 5757068 | 5757068 | - | 0 | 0 | -53.74550149 |
| chr19 | 5757076 | 5757076 | + | 0 | 0 | -56.70437406 |
| chr19 | 5757077 | 5757077 | - | 0 | 0 | -48.6069367  |
| chr19 | 5757081 | 5757081 | + | 0 | 0 | -56.48604269 |
| chr19 | 5757082 | 5757082 | - | 0 | 0 | -51.68986608 |
| chr19 | 5757092 | 5757092 | + | 0 | 0 | -47.68572289 |
| chr19 | 5757093 | 5757093 | - | 0 | 0 | -48.71667969 |

|       |         |         |   |           |            |              |
|-------|---------|---------|---|-----------|------------|--------------|
| chr19 | 5757103 | 5757103 | + | 0         | 0          | -51.27111463 |
| chr19 | 5757104 | 5757104 | - | 0         | 0          | -56.80132375 |
| chr19 | 5757108 | 5757108 | + | 0         | 0          | -48.60727317 |
| chr19 | 5757109 | 5757109 | - | 0         | 0          | -54.73539954 |
| chr19 | 5757119 | 5757119 | + | 0         | 0          | -48.73358349 |
| chr19 | 5757120 | 5757120 | - | 0         | 0          | -56.01246106 |
| chr19 | 5757133 | 5757133 | - | 0         | 0          | -48.52447454 |
| chr19 | 5757141 | 5757141 | + | 0         | 0          | -54.07249119 |
| chr19 | 5757145 | 5757145 | + | 0         | 0          | -51.24297029 |
| chr19 | 5757147 | 5757147 | + | 0         | 0          | -27.82193159 |
| chr19 | 5757162 | 5757162 | + | 0         | 0          | -49.74511017 |
| chr19 | 5757173 | 5757173 | + | 0         | 0          | -58.53971624 |
| chr19 | 5757183 | 5757183 | + | 0         | 0          | -54.78710104 |
| chr19 | 5757190 | 5757190 | + | 0         | 0          | -54.70711059 |
| chr19 | 5757201 | 5757201 | - | 0         | 0          | -25.57506608 |
| chr19 | 5757248 | 5757248 | + | 0         | 0          | -57.88220551 |
| chr19 | 5757249 | 5757249 | - | 0         | 0          | -53.36906794 |
| chr19 | 5757430 | 5757430 | - | 3.18E-11  | 1.25E-09   | -57.22559294 |
| chr19 | 5757453 | 5757453 | - | 7.81E-06  | 0.00013257 | -28.59848485 |
| chr19 | 5757472 | 5757472 | - | 5.96E-06  | 0.00010405 | -33.94230769 |
| chr19 | 5810207 | 5810207 | + | 0         | 0          | -25.46348704 |
| chr19 | 5810263 | 5810263 | - | 0         | 0          | -27.23732528 |
| chr19 | 5927263 | 5927263 | + | 0         | 0          | -26.60714734 |
| chr19 | 5927264 | 5927264 | - | 0         | 0          | -26.44203813 |
| chr19 | 5927291 | 5927291 | - | 1.11E-16  | 7.26E-15   | -25.17169069 |
| chr19 | 5952260 | 5952260 | + | 0         | 0          | -32.21281884 |
| chr19 | 5952315 | 5952315 | - | 0         | 0          | -25.67495439 |
| chr19 | 6016061 | 6016061 | - | 6.99E-07  | 1.48E-05   | -25.24455773 |
| chr19 | 6016537 | 6016537 | + | 0         | 0          | -25.11222357 |
| chr19 | 6044611 | 6044611 | + | 0.0008149 | 0.00746276 | -28.07017544 |
| chr19 | 6347109 | 6347109 | + | 0         | 0          | -27.36533954 |
| chr19 | 6384528 | 6384528 | - | 0         | 0          | -30.41387101 |
| chr19 | 6385226 | 6385226 | + | 0         | 0          | -32.75582403 |
| chr19 | 6385244 | 6385244 | + | 0         | 0          | -38.06618241 |
| chr19 | 6385300 | 6385300 | - | 0         | 0          | -27.57884615 |
| chr19 | 6388099 | 6388099 | - | 0         | 0          | -42.17893218 |
| chr19 | 6415671 | 6415671 | + | 0         | 0          | -33.00309434 |
| chr19 | 6415682 | 6415682 | + | 0         | 0          | -33.39831494 |
| chr19 | 6415683 | 6415683 | - | 0         | 0          | -31.8954972  |
| chr19 | 6415722 | 6415722 | - | 0         | 0          | -31.2175974  |
| chr19 | 6420866 | 6420866 | - | 3.78E-12  | 1.64E-10   | -25.99938761 |

|       |         |         |   |          |          |              |
|-------|---------|---------|---|----------|----------|--------------|
| chr19 | 6499581 | 6499581 | + | 1.25E-13 | 6.33E-12 | -25.52920717 |
| chr19 | 6513734 | 6513734 | - | 8.93E-14 | 4.57E-12 | -27.048426   |
| chr19 | 6685569 | 6685569 | + | 0        | 0        | -29.73421927 |
| chr19 | 6829896 | 6829896 | + | 0        | 0        | -25.22172068 |
| chr19 | 6829960 | 6829960 | - | 0        | 0        | -38.98171644 |
| chr19 | 6829968 | 6829968 | - | 0        | 0        | -34.54729926 |
| chr19 | 6829971 | 6829971 | - | 0        | 0        | -33.92692741 |
| chr19 | 6829987 | 6829987 | - | 0        | 0        | -42.83969466 |
| chr19 | 6830004 | 6830004 | - | 0        | 0        | -30.26172301 |
| chr19 | 6830007 | 6830007 | + | 0        | 0        | -33.24736423 |
| chr19 | 6830034 | 6830034 | - | 0        | 0        | -32.05007583 |
| chr19 | 6830036 | 6830036 | + | 0        | 0        | -40.92075195 |
| chr19 | 6830037 | 6830037 | - | 0        | 0        | -40.53913439 |
| chr19 | 6830043 | 6830043 | + | 0        | 0        | -40.12845263 |
| chr19 | 6830044 | 6830044 | - | 0        | 0        | -33.14576635 |
| chr19 | 6830047 | 6830047 | + | 0        | 0        | -42.32150061 |
| chr19 | 6830048 | 6830048 | - | 0        | 0        | -41.07163266 |
| chr19 | 6830049 | 6830049 | + | 0        | 0        | -42.6082582  |
| chr19 | 6830050 | 6830050 | - | 0        | 0        | -39.07162218 |
| chr19 | 6830054 | 6830054 | + | 0        | 0        | -30.54350282 |
| chr19 | 6830055 | 6830055 | - | 0        | 0        | -39.88337    |
| chr19 | 6830069 | 6830069 | + | 0        | 0        | -40.63701558 |
| chr19 | 6830086 | 6830086 | + | 0        | 0        | -41.79259259 |
| chr19 | 6830197 | 6830197 | - | 0        | 0        | -37.49382106 |
| chr19 | 6830205 | 6830205 | - | 0        | 0        | -46.48008692 |
| chr19 | 6830207 | 6830207 | - | 0        | 0        | -37.88334556 |
| chr19 | 6830228 | 6830228 | - | 0        | 0        | -35.97984648 |
| chr19 | 6830237 | 6830237 | + | 0        | 0        | -44.36929476 |
| chr19 | 6830238 | 6830238 | - | 0        | 0        | -57.25255973 |
| chr19 | 6830283 | 6830283 | + | 0        | 0        | -38.85628971 |
| chr19 | 6830291 | 6830291 | - | 0        | 0        | -33.52701813 |
| chr19 | 6830301 | 6830301 | - | 0        | 0        | -50.10559313 |
| chr19 | 6830306 | 6830306 | - | 0        | 0        | -34.20757746 |
| chr19 | 6830335 | 6830335 | + | 0        | 0        | -52.6062253  |
| chr19 | 6830336 | 6830336 | - | 0        | 0        | -48.92358791 |
| chr19 | 6830340 | 6830340 | + | 0        | 0        | -53.32463145 |
| chr19 | 6830341 | 6830341 | - | 0        | 0        | -46.81116585 |
| chr19 | 6830372 | 6830372 | + | 0        | 0        | -43.63752982 |
| chr19 | 6830373 | 6830373 | - | 0        | 0        | -36.28384687 |
| chr19 | 6830375 | 6830375 | + | 0        | 0        | -51.72953964 |
| chr19 | 6830379 | 6830379 | + | 0        | 0        | -41.77530472 |

|       |         |         |   |            |            |              |
|-------|---------|---------|---|------------|------------|--------------|
| chr19 | 6830384 | 6830384 | + | 0          | 0          | -44.13666715 |
| chr19 | 6830390 | 6830390 | + | 0          | 0          | -42.02370379 |
| chr19 | 6830397 | 6830397 | + | 0          | 0          | -39.48838944 |
| chr19 | 6830399 | 6830399 | + | 0          | 0          | -49.76149246 |
| chr19 | 6830401 | 6830401 | + | 0          | 0          | -47.69829317 |
| chr19 | 6830407 | 6830407 | + | 0          | 0          | -48.03971311 |
| chr19 | 6830420 | 6830420 | + | 0          | 0          | -55.53149783 |
| chr19 | 6830531 | 6830531 | + | 3.35E-11   | 1.32E-09   | -35.05201266 |
| chr19 | 6830532 | 6830532 | - | 0          | 0          | -51.3849253  |
| chr19 | 6830659 | 6830659 | - | 0          | 0          | -34.55704413 |
| chr19 | 6856986 | 6856986 | - | 0.00067452 | 0.0063846  | -31.20567376 |
| chr19 | 6925765 | 6925765 | + | 0          | 0          | -30.98060345 |
| chr19 | 6925955 | 6925955 | - | 0.00010817 | 0.00134908 | -33.84236453 |
| chr19 | 6926173 | 6926173 | - | 0          | 0          | -30.52818942 |
| chr19 | 6926179 | 6926179 | - | 0          | 0          | -30.93666444 |
| chr19 | 6926244 | 6926244 | + | 1.50E-09   | 4.84E-08   | -29.69924812 |
| chr19 | 6926245 | 6926245 | - | 5.78E-09   | 1.72E-07   | -27.92542373 |
| chr19 | 6926298 | 6926298 | - | 0          | 0          | -33.0011529  |
| chr19 | 6926324 | 6926324 | - | 0          | 0          | -29.83668708 |
| chr19 | 6926326 | 6926326 | - | 0          | 0          | -25.48668928 |
| chr19 | 7065406 | 7065406 | + | 2.10E-13   | 1.04E-11   | -26.75847359 |
| chr19 | 7065407 | 7065407 | - | 0          | 0          | -32.66306552 |
| chr19 | 7070340 | 7070340 | + | 0          | 0          | -42.20686124 |
| chr19 | 7070350 | 7070350 | + | 0          | 0          | -55.03478434 |
| chr19 | 7070358 | 7070358 | + | 0          | 0          | -57.75101329 |
| chr19 | 7070523 | 7070523 | - | 4.44E-16   | 2.79E-14   | -52.71221532 |
| chr19 | 7070569 | 7070569 | - | 9.27E-10   | 3.07E-08   | -32.03508772 |
| chr19 | 7070572 | 7070572 | + | 1.74E-14   | 9.53E-13   | -26.89440994 |
| chr19 | 7070634 | 7070634 | - | 0          | 0          | -39.06039393 |
| chr19 | 7070655 | 7070655 | - | 0          | 0          | -42.61317138 |
| chr19 | 7070671 | 7070671 | - | 3.54E-14   | 1.88E-12   | -47.41857488 |
| chr19 | 7070692 | 7070692 | - | 4.17E-11   | 1.62E-09   | -42.96605293 |
| chr19 | 7096444 | 7096444 | + | 0          | 0          | -55.98231075 |
| chr19 | 7096457 | 7096457 | + | 0          | 0          | -54.63761657 |
| chr19 | 7096468 | 7096468 | + | 0          | 0          | -53.66704787 |
| chr19 | 7096585 | 7096585 | - | 0          | 0          | -37.38360869 |
| chr19 | 7096603 | 7096603 | - | 0          | 0          | -28.2342918  |
| chr19 | 7121539 | 7121539 | + | 0          | 0          | -29.76356662 |
| chr19 | 7121562 | 7121562 | + | 0          | 0          | -30.62781609 |
| chr19 | 7121735 | 7121735 | - | 0          | 0          | -27.60528635 |
| chr19 | 7134842 | 7134842 | + | 0          | 0          | -35.63694686 |

|       |          |          |   |            |            |              |
|-------|----------|----------|---|------------|------------|--------------|
| chr19 | 7134892  | 7134892  | + | 0          | 0          | -40.3771813  |
| chr19 | 7135042  | 7135042  | + | 1.14E-05   | 0.00018599 | -33.77403846 |
| chr19 | 7141254  | 7141254  | + | 0          | 0          | -32.21928531 |
| chr19 | 7141281  | 7141281  | + | 1.41E-10   | 5.16E-09   | -27.25200074 |
| chr19 | 7186184  | 7186184  | + | 0          | 0          | -35.62404573 |
| chr19 | 7186185  | 7186185  | - | 0          | 0          | -41.48712648 |
| chr19 | 7186205  | 7186205  | - | 0          | 0          | -38.72733307 |
| chr19 | 7186207  | 7186207  | - | 0          | 0          | -36.16518143 |
| chr19 | 7186219  | 7186219  | - | 0          | 0          | -37.74981495 |
| chr19 | 7187906  | 7187906  | - | 0          | 0          | -40.84293511 |
| chr19 | 7187948  | 7187948  | - | 0          | 0          | -28.49698935 |
| chr19 | 7343605  | 7343605  | - | 1.90E-06   | 3.69E-05   | -32.9109063  |
| chr19 | 7420432  | 7420432  | - | 5.79E-06   | 0.00010136 | -25.33691275 |
| chr19 | 7420453  | 7420453  | - | 3.30E-07   | 7.43E-06   | -28.92281595 |
| chr19 | 8679364  | 8679364  | - | 0          | 0          | -35.38455563 |
| chr19 | 8679378  | 8679378  | + | 0          | 0          | -26.31218424 |
| chr19 | 8679577  | 8679577  | - | 0          | 0          | -31.3528225  |
| chr19 | 8989100  | 8989100  | + | 0          | 0          | -34.79843444 |
| chr19 | 8989101  | 8989101  | - | 0          | 0          | -32.91986858 |
| chr19 | 9100832  | 9100832  | - | 0          | 0          | -29.26263507 |
| chr19 | 9107126  | 9107126  | + | 6.35E-11   | 2.42E-09   | -25.81040481 |
| chr19 | 9987338  | 9987338  | + | 1.77E-11   | 7.16E-10   | -37.5286757  |
| chr19 | 9987379  | 9987379  | + | 1.90E-07   | 4.46E-06   | -30.41155311 |
| chr19 | 10183964 | 10183964 | - | 1.60E-11   | 6.53E-10   | -25.08838384 |
| chr19 | 10184271 | 10184271 | + | 6.76E-05   | 0.00089799 | -25.97788414 |
| chr19 | 10210566 | 10210566 | - | 0.0003875  | 0.00401644 | -27.75862069 |
| chr19 | 10231378 | 10231378 | - | 1.10E-07   | 2.69E-06   | -26.38847599 |
| chr19 | 10267059 | 10267059 | + | 0          | 0          | -30.02619605 |
| chr19 | 10267213 | 10267213 | - | 0          | 0          | -39.14795648 |
| chr19 | 10277673 | 10277673 | - | 0.00059165 | 0.00572512 | -35.36585366 |
| chr19 | 10277775 | 10277775 | - | 0          | 0          | -26.1426866  |
| chr19 | 10291847 | 10291847 | - | 0          | 0          | -30.04441558 |
| chr19 | 10291868 | 10291868 | + | 0          | 0          | -30.38277512 |
| chr19 | 10345561 | 10345561 | + | 2.69E-08   | 7.26E-07   | -26.02269983 |
| chr19 | 10383793 | 10383793 | - | 1.99E-05   | 0.00030623 | -30.27777778 |
| chr19 | 10456512 | 10456512 | - | 1.49E-07   | 3.56E-06   | -27.44637085 |
| chr19 | 10474600 | 10474600 | - | 1.01E-09   | 3.32E-08   | -25.37313433 |
| chr19 | 10720326 | 10720326 | - | 5.22E-09   | 1.56E-07   | -26.81045909 |
| chr19 | 10720378 | 10720378 | + | 0          | 0          | -29.50731741 |
| chr19 | 10723190 | 10723190 | - | 0          | 0          | -28.17877562 |
| chr19 | 10723208 | 10723208 | - | 0          | 0          | -26.67705053 |

|       |          |          |   |            |            |              |
|-------|----------|----------|---|------------|------------|--------------|
| chr19 | 10818507 | 10818507 | + | 3.66E-14   | 1.94E-12   | -29.61248013 |
| chr19 | 10818519 | 10818519 | + | 2.46E-09   | 7.69E-08   | -25.52579365 |
| chr19 | 10863115 | 10863115 | + | 3.44E-13   | 1.66E-11   | -28.09303327 |
| chr19 | 10941318 | 10941318 | + | 0          | 0          | -26.02611316 |
| chr19 | 12585602 | 12585602 | - | 0.00029117 | 0.00315631 | -28.61084064 |
| chr19 | 14599312 | 14599312 | - | 0.00026887 | 0.00295078 | -29.43548387 |
| chr19 | 14599330 | 14599330 | - | 7.23E-06   | 0.00012368 | -37.62295082 |
| chr19 | 14599339 | 14599339 | - | 2.71E-13   | 1.32E-11   | -68.75       |
| chr19 | 14599351 | 14599351 | - | 0.00046162 | 0.00465212 | -35.55555556 |
| chr19 | 15923631 | 15923631 | - | 6.92E-07   | 1.47E-05   | -41.33175729 |
| chr19 | 16436900 | 16436900 | - | 0          | 0          | -30.78486845 |
| chr19 | 16436966 | 16436966 | + | 0          | 0          | -30.3325605  |
| chr19 | 17171051 | 17171051 | + | 9.85E-09   | 2.83E-07   | -44.39241918 |
| chr19 | 17199267 | 17199267 | - | 2.20E-13   | 1.08E-11   | -27.07484117 |
| chr19 | 20835469 | 20835469 | - | 0.00037353 | 0.00389589 | 35           |
| chr19 | 21174819 | 21174819 | - | 3.58E-13   | 1.73E-11   | -32.21767883 |
| chr19 | 23136564 | 23136564 | + | 0          | 0          | -35.39441973 |
| chr19 | 23136565 | 23136565 | - | 0          | 0          | -25.27514701 |
| chr19 | 23136574 | 23136574 | + | 0          | 0          | -34.04461014 |
| chr19 | 23136610 | 23136610 | - | 0          | 0          | -30.09944918 |
| chr19 | 23136629 | 23136629 | - | 0          | 0          | -27.44251409 |
| chr19 | 23136654 | 23136654 | - | 0          | 0          | -32.84278018 |
| chr19 | 23136690 | 23136690 | + | 1.86E-08   | 5.14E-07   | -31.86018481 |
| chr19 | 23136937 | 23136937 | - | 2.09E-08   | 5.72E-07   | -34.04028074 |
| chr19 | 23153044 | 23153044 | + | 0          | 0          | -29.42696329 |
| chr19 | 23153045 | 23153045 | - | 0          | 0          | -28.83267173 |
| chr19 | 23153098 | 23153098 | - | 0          | 0          | -25.2364968  |
| chr19 | 23578600 | 23578600 | - | 3.63E-05   | 0.00051998 | -28.73055906 |
| chr19 | 23911009 | 23911009 | - | 0          | 0          | -28.53115341 |
| chr19 | 24272162 | 24272162 | - | 3.60E-05   | 0.00051665 | -26.02636535 |
| chr19 | 24301661 | 24301661 | + | 0          | 0          | -32.60932051 |
| chr19 | 24871277 | 24871277 | + | 0          | 0          | -25.55371155 |
| chr19 | 25097116 | 25097116 | + | 0          | 0          | -40.09802103 |
| chr19 | 25097117 | 25097117 | - | 0          | 0          | -37.70734136 |
| chr19 | 25123161 | 25123161 | - | 0          | 0          | -29.59634425 |
| chr19 | 25123165 | 25123165 | - | 0          | 0          | -35.55581168 |
| chr19 | 25123176 | 25123176 | - | 0          | 0          | -36.08702852 |
| chr19 | 26621224 | 26621224 | - | 3.05E-06   | 5.68E-05   | -25.74561404 |
| chr19 | 26749884 | 26749884 | + | 6.99E-13   | 3.28E-11   | -25.72210815 |
| chr19 | 26852512 | 26852512 | + | 4.30E-12   | 1.86E-10   | -27.77777778 |
| chr19 | 27147437 | 27147437 | + | 0          | 0          | -33.4950046  |

|       |          |          |   |            |            |              |
|-------|----------|----------|---|------------|------------|--------------|
| chr19 | 27147501 | 27147501 | - | 0          | 0          | -29.41419518 |
| chr19 | 27147507 | 27147507 | - | 0          | 0          | -34.34297761 |
| chr19 | 27147535 | 27147535 | + | 0          | 0          | -30.63601613 |
| chr19 | 27147536 | 27147536 | - | 0          | 0          | -27.33223402 |
| chr19 | 27147541 | 27147541 | + | 0          | 0          | -37.29258347 |
| chr19 | 27147544 | 27147544 | + | 0          | 0          | -31.68770405 |
| chr19 | 27147604 | 27147604 | - | 0          | 0          | -36.39005849 |
| chr19 | 28967890 | 28967890 | + | 7.00E-10   | 2.35E-08   | -25.52380952 |
| chr19 | 29501171 | 29501171 | - | 3.02E-13   | 1.47E-11   | -32.63305322 |
| chr19 | 30029853 | 30029853 | + | 0          | 0          | -38.94182103 |
| chr19 | 30029995 | 30029995 | - | 0          | 0          | -35.19325159 |
| chr19 | 30030004 | 30030004 | - | 0          | 0          | -35.01978201 |
| chr19 | 30491243 | 30491243 | - | 0          | 0          | -26.67143581 |
| chr19 | 30491255 | 30491255 | - | 0          | 0          | -27.51117512 |
| chr19 | 32344583 | 32344583 | - | 5.87E-14   | 3.06E-12   | -39.12986157 |
| chr19 | 32344612 | 32344612 | - | 8.88E-16   | 5.45E-14   | -30.05140109 |
| chr19 | 32373998 | 32373998 | + | 0          | 0          | -27.69739589 |
| chr19 | 32755282 | 32755282 | + | 2.97E-08   | 7.96E-07   | -39.94272623 |
| chr19 | 34923223 | 34923223 | - | 0.00049338 | 0.00491933 | -26.2380301  |
| chr19 | 37520875 | 37520875 | + | 4.07E-13   | 1.95E-11   | -25.90918819 |
| chr19 | 37521028 | 37521028 | - | 6.55E-07   | 1.40E-05   | -26.8550351  |
| chr19 | 37521032 | 37521032 | - | 2.84E-10   | 1.00E-08   | -33.77395902 |
| chr19 | 37686516 | 37686516 | - | 6.38E-08   | 1.62E-06   | -27.38095238 |
| chr19 | 37687530 | 37687530 | + | 0          | 0          | -35.75573181 |
| chr19 | 37687571 | 37687571 | - | 0          | 0          | -29.85266709 |
| chr19 | 37687617 | 37687617 | + | 0          | 0          | -30.62797443 |
| chr19 | 37687618 | 37687618 | - | 0          | 0          | -38.56315086 |
| chr19 | 37687632 | 37687632 | + | 0          | 0          | -43.11653661 |
| chr19 | 37687688 | 37687688 | - | 0          | 0          | -31.35620839 |
| chr19 | 37687693 | 37687693 | - | 0          | 0          | -27.19303133 |
| chr19 | 37687703 | 37687703 | - | 0          | 0          | -30.64387643 |
| chr19 | 37687707 | 37687707 | + | 3.25E-06   | 6.02E-05   | -26.14221364 |
| chr19 | 37687735 | 37687735 | + | 0          | 0          | -30.47482701 |
| chr19 | 37687761 | 37687761 | + | 0          | 0          | -30.78550961 |
| chr19 | 37687762 | 37687762 | - | 0          | 0          | -32.97789831 |
| chr19 | 37687774 | 37687774 | - | 0          | 0          | -27.47057788 |
| chr19 | 37687776 | 37687776 | - | 0          | 0          | -27.15414944 |
| chr19 | 37687796 | 37687796 | + | 0          | 0          | -27.51966568 |
| chr19 | 37687797 | 37687797 | - | 0          | 0          | -32.07300872 |
| chr19 | 37690903 | 37690903 | + | 0          | 0          | -40.78567492 |
| chr19 | 37690929 | 37690929 | + | 0          | 0          | -37.93229304 |



|       |          |          |   |            |            |              |
|-------|----------|----------|---|------------|------------|--------------|
| chr19 | 37690940 | 37690940 | + | 0          | 0          | -32.00312249 |
| chr19 | 37690941 | 37690941 | - | 0          | 0          | -39.51204203 |
| chr19 | 37690949 | 37690949 | + | 0          | 0          | -30.94983538 |
| chr19 | 37690950 | 37690950 | - | 0          | 0          | -35.79529475 |
| chr19 | 37690969 | 37690969 | - | 0          | 0          | -32.41849685 |
| chr19 | 37690979 | 37690979 | - | 0          | 0          | -48.93138756 |
| chr19 | 37690982 | 37690982 | - | 0          | 0          | -39.33990456 |
| chr19 | 37695303 | 37695303 | + | 0          | 0          | -33.39654446 |
| chr19 | 37695511 | 37695511 | - | 5.62E-13   | 2.66E-11   | -44.07137578 |
| chr19 | 37695549 | 37695549 | - | 4.08E-12   | 1.77E-10   | -42.03791912 |
| chr19 | 37695824 | 37695824 | + | 0          | 0          | -30.29297157 |
| chr19 | 37702953 | 37702953 | - | 9.44E-08   | 2.33E-06   | -29.42340305 |
| chr19 | 37778221 | 37778221 | - | 0.00059569 | 0.00575755 | -29.39814815 |
| chr19 | 37877722 | 37877722 | + | 1.11E-16   | 7.26E-15   | -34.69793323 |
| chr19 | 37877740 | 37877740 | + | 0          | 0          | -36.76678218 |
| chr19 | 37877884 | 37877884 | - | 7.08E-11   | 2.68E-09   | -34.81784562 |
| chr19 | 37877893 | 37877893 | - | 2.75E-08   | 7.39E-07   | -28.42833996 |
| chr19 | 37877971 | 37877971 | + | 0          | 0          | -30.48058712 |
| chr19 | 37877972 | 37877972 | - | 0          | 0          | -37.21224419 |
| chr19 | 37878004 | 37878004 | - | 0          | 0          | -37.05031208 |
| chr19 | 37878020 | 37878020 | - | 0          | 0          | -30.48240503 |
| chr19 | 37918544 | 37918544 | + | 0          | 0          | -49.68333908 |
| chr19 | 37918571 | 37918571 | + | 2.44E-15   | 1.44E-13   | -30.1933874  |
| chr19 | 37918755 | 37918755 | + | 0          | 0          | -55.89333077 |
| chr19 | 37918756 | 37918756 | - | 0          | 0          | -48.25565733 |
| chr19 | 37918761 | 37918761 | + | 0          | 0          | -39.57057823 |
| chr19 | 37918769 | 37918769 | + | 0          | 0          | -49.14010633 |
| chr19 | 37918791 | 37918791 | + | 0          | 0          | -50.66799517 |
| chr19 | 37918889 | 37918889 | - | 0          | 0          | -37.54425108 |
| chr19 | 37965854 | 37965854 | + | 0          | 0          | -25.68472468 |
| chr19 | 40253757 | 40253757 | - | 0          | 0          | -31.67718455 |
| chr19 | 40253805 | 40253805 | + | 0          | 0          | -29.72395525 |
| chr19 | 40253806 | 40253806 | - | 0          | 0          | -28.1819556  |
| chr19 | 40253836 | 40253836 | + | 0          | 0          | -38.33205625 |
| chr19 | 40253858 | 40253858 | - | 0          | 0          | -34.20120398 |
| chr19 | 40253903 | 40253903 | - | 0          | 0          | -35.75601763 |
| chr19 | 40490059 | 40490059 | + | 3.67E-06   | 6.73E-05   | -48.04804805 |
| chr19 | 40490295 | 40490295 | + | 0          | 0          | -25.08027049 |
| chr19 | 40490407 | 40490407 | - | 0          | 0          | -25.31501682 |
| chr19 | 40490439 | 40490439 | + | 2.24E-13   | 1.10E-11   | -30.35028249 |
| chr19 | 40490440 | 40490440 | - | 0          | 0          | -32.24275724 |

|       |          |          |   |            |            |              |
|-------|----------|----------|---|------------|------------|--------------|
| chr19 | 40554697 | 40554697 | - | 0          | 0          | -40.89098824 |
| chr19 | 40554704 | 40554704 | - | 0          | 0          | -38.372417   |
| chr19 | 40554708 | 40554708 | - | 0          | 0          | -46.37411965 |
| chr19 | 40749041 | 40749041 | + | 0          | 0          | -25.12277087 |
| chr19 | 40749066 | 40749066 | - | 0          | 0          | -28.00852658 |
| chr19 | 40830239 | 40830239 | - | 0.00014979 | 0.00178796 | -26.86515292 |
| chr19 | 40873157 | 40873157 | + | 0          | 0          | -27.17550468 |
| chr19 | 40873162 | 40873162 | + | 0          | 0          | -35.99787501 |
| chr19 | 40873181 | 40873181 | + | 0          | 0          | -39.15823967 |
| chr19 | 40873187 | 40873187 | + | 0          | 0          | -26.56014723 |
| chr19 | 40873192 | 40873192 | + | 0          | 0          | -40.75443464 |
| chr19 | 40873201 | 40873201 | + | 0          | 0          | -45.65199339 |
| chr19 | 40873282 | 40873282 | - | 0          | 0          | -30.00488294 |
| chr19 | 40873357 | 40873357 | + | 0          | 0          | -25.05448268 |
| chr19 | 40936062 | 40936062 | + | 0          | 0          | -27.06048137 |
| chr19 | 40936209 | 40936209 | - | 0          | 0          | -30.21549333 |
| chr19 | 40959461 | 40959461 | + | 0          | 0          | -27.55888819 |
| chr19 | 40959462 | 40959462 | - | 5.34E-13   | 2.53E-11   | -27.33850129 |
| chr19 | 40996013 | 40996013 | - | 1.28E-05   | 0.00020572 | -32.05128205 |
| chr19 | 41389519 | 41389519 | + | 0          | 0          | -25.34804979 |
| chr19 | 41441882 | 41441882 | - | 7.10E-10   | 2.38E-08   | -25.77294353 |
| chr19 | 41896616 | 41896616 | - | 0          | 0          | -25.56064073 |
| chr19 | 42034677 | 42034677 | - | 4.06E-14   | 2.15E-12   | -39.2907233  |
| chr19 | 42034688 | 42034688 | - | 7.32E-07   | 1.55E-05   | -26.67112299 |
| chr19 | 42130445 | 42130445 | + | 2.15E-05   | 0.00032805 | -25.92706476 |
| chr19 | 42130446 | 42130446 | - | 0          | 0          | -26.2840595  |
| chr19 | 42167847 | 42167847 | - | 0.00079687 | 0.00732641 | -34.77011494 |
| chr19 | 42742007 | 42742007 | - | 0          | 0          | -31.29551327 |
| chr19 | 42752227 | 42752227 | + | 0          | 0          | -26.57616612 |
| chr19 | 42752279 | 42752279 | - | 0          | 0          | -27.28260792 |
| chr19 | 42752448 | 42752448 | - | 2.00E-15   | 1.19E-13   | -34.54088953 |
| chr19 | 43017897 | 43017897 | + | 0          | 0          | -30.98424565 |
| chr19 | 43017898 | 43017898 | - | 0          | 0          | -29.99259259 |
| chr19 | 43017916 | 43017916 | - | 0          | 0          | -33.78518519 |
| chr19 | 43441943 | 43441943 | - | 0          | 0          | -31.64845173 |
| chr19 | 43544567 | 43544567 | + | 0.00072163 | 0.00674857 | 27.41545894  |
| chr19 | 43546422 | 43546422 | - | 0          | 0          | -29.13220941 |
| chr19 | 43547044 | 43547044 | + | 0          | 0          | -39.80653283 |
| chr19 | 43547045 | 43547045 | - | 4.19E-10   | 1.45E-08   | -44.06015038 |
| chr19 | 43547084 | 43547084 | - | 2.97E-11   | 1.18E-09   | -25.85697076 |
| chr19 | 43564198 | 43564198 | + | 3.33E-07   | 7.49E-06   | -27.90598291 |

|       |          |          |   |            |            |              |
|-------|----------|----------|---|------------|------------|--------------|
| chr19 | 43584366 | 43584366 | - | 2.62E-12   | 1.16E-10   | -29.43548387 |
| chr19 | 43584376 | 43584376 | - | 3.84E-10   | 1.33E-08   | -27.15268737 |
| chr19 | 43619077 | 43619077 | - | 4.30E-08   | 1.12E-06   | -30.99947118 |
| chr19 | 43619086 | 43619086 | - | 8.34E-07   | 1.74E-05   | -28.02648172 |
| chr19 | 43619363 | 43619363 | + | 0          | 0          | -31.43233121 |
| chr19 | 43619423 | 43619423 | + | 0          | 0          | -31.29643495 |
| chr19 | 43619436 | 43619436 | + | 0          | 0          | -32.48115037 |
| chr19 | 43619580 | 43619580 | + | 1.38E-06   | 2.77E-05   | -52.99145299 |
| chr19 | 43619595 | 43619595 | + | 2.51E-06   | 4.76E-05   | -48.28017511 |
| chr19 | 43619629 | 43619629 | + | 3.77E-05   | 0.00053753 | -34.86842105 |
| chr19 | 43620085 | 43620085 | + | 0          | 0          | -25.4651571  |
| chr19 | 43620086 | 43620086 | - | 0          | 0          | -43.2185204  |
| chr19 | 43878833 | 43878833 | + | 0          | 0          | -34.73082596 |
| chr19 | 43878834 | 43878834 | - | 9.52E-13   | 4.40E-11   | -32.31556503 |
| chr19 | 43879064 | 43879064 | - | 2.65E-13   | 1.30E-11   | -31.06663451 |
| chr19 | 43920618 | 43920618 | + | 0          | 0          | -33.68944174 |
| chr19 | 43920711 | 43920711 | - | 0          | 0          | -32.89312169 |
| chr19 | 43920729 | 43920729 | + | 0          | 0          | -56.67565139 |
| chr19 | 43920754 | 43920754 | + | 0          | 0          | -47.41071429 |
| chr19 | 43920762 | 43920762 | + | 1.20E-14   | 6.65E-13   | -43.73557758 |
| chr19 | 44301245 | 44301245 | + | 0.00013492 | 0.00163331 | -29.68536252 |
| chr19 | 44301256 | 44301256 | + | 5.02E-09   | 1.50E-07   | -46.47742818 |
| chr19 | 44755406 | 44755406 | + | 0.00017081 | 0.00200174 | 26.41509434  |
| chr19 | 44825185 | 44825185 | + | 2.26E-11   | 9.03E-10   | -30.40123457 |
| chr19 | 44825323 | 44825323 | - | 4.88E-15   | 2.82E-13   | -25.90528808 |
| chr19 | 44914751 | 44914751 | - | 3.68E-06   | 6.73E-05   | -29.03318903 |
| chr19 | 44929896 | 44929896 | + | 4.36E-11   | 1.69E-09   | -25.24954628 |
| chr19 | 45023620 | 45023620 | - | 0          | 0          | -28.97849727 |
| chr19 | 45040152 | 45040152 | - | 2.50E-10   | 8.89E-09   | -26.38888889 |
| chr19 | 45045447 | 45045447 | + | 0          | 0          | -31.0527276  |
| chr19 | 45045468 | 45045468 | + | 1.83E-13   | 9.09E-12   | -26.08331022 |
| chr19 | 45045637 | 45045637 | - | 1.23E-09   | 4.00E-08   | -27.95556579 |
| chr19 | 45065621 | 45065621 | - | 1.05E-05   | 0.00017351 | -32.77596026 |
| chr19 | 45065623 | 45065623 | + | 5.48E-07   | 1.18E-05   | -34.08258408 |
| chr19 | 45065624 | 45065624 | - | 1.30E-06   | 2.62E-05   | -35.81780538 |
| chr19 | 45067446 | 45067446 | - | 3.23E-07   | 7.28E-06   | -27.3237054  |
| chr19 | 45078339 | 45078339 | + | 0          | 0          | -25.21524072 |
| chr19 | 45078428 | 45078428 | + | 2.64E-09   | 8.23E-08   | -38.95592021 |
| chr19 | 45078643 | 45078643 | - | 7.46E-09   | 2.18E-07   | -26.28324057 |
| chr19 | 45078655 | 45078655 | - | 2.28E-09   | 7.15E-08   | -27.2556391  |
| chr19 | 45208831 | 45208831 | - | 1.11E-16   | 7.26E-15   | -39.83901515 |

|       |          |          |   |            |            |              |
|-------|----------|----------|---|------------|------------|--------------|
| chr19 | 45208839 | 45208839 | + | 5.49E-12   | 2.35E-10   | -33.10861423 |
| chr19 | 45208845 | 45208845 | + | 2.26E-09   | 7.09E-08   | -29.585295   |
| chr19 | 45208861 | 45208861 | + | 0          | 0          | -28.67163581 |
| chr19 | 45208907 | 45208907 | + | 0          | 0          | -36.40945229 |
| chr19 | 45208908 | 45208908 | - | 0          | 0          | -34.62831286 |
| chr19 | 45208909 | 45208909 | + | 0          | 0          | -36.45729767 |
| chr19 | 45208910 | 45208910 | - | 0          | 0          | -32.29964144 |
| chr19 | 45270636 | 45270636 | - | 0          | 0          | -27.14555697 |
| chr19 | 45270670 | 45270670 | + | 5.56E-07   | 1.20E-05   | -25.27472527 |
| chr19 | 45329801 | 45329801 | - | 0.00015896 | 0.00188183 | -30.07207207 |
| chr19 | 45534587 | 45534587 | - | 0          | 0          | -26.20052176 |
| chr19 | 45695953 | 45695953 | + | 0.00022212 | 0.00250556 | -25.25311526 |
| chr19 | 45717594 | 45717594 | + | 0          | 0          | -25.63170007 |
| chr19 | 45741040 | 45741040 | + | 4.69E-05   | 0.00065256 | -31.76906453 |
| chr19 | 45741231 | 45741231 | + | 1.99E-05   | 0.00030623 | -34.12698413 |
| chr19 | 45741232 | 45741232 | - | 0          | 0          | -37.12662473 |
| chr19 | 45743379 | 45743379 | - | 0          | 0          | -51.38127854 |
| chr19 | 45743381 | 45743381 | - | 0          | 0          | -47.44376859 |
| chr19 | 45743431 | 45743431 | + | 0          | 0          | -44.92753623 |
| chr19 | 45743432 | 45743432 | - | 0          | 0          | -37.98839458 |
| chr19 | 45743443 | 45743443 | + | 0          | 0          | -32.62844138 |
| chr19 | 45743444 | 45743444 | - | 0          | 0          | -30.98432293 |
| chr19 | 45744032 | 45744032 | + | 0          | 0          | -26.27031195 |
| chr19 | 45795943 | 45795943 | - | 2.34E-06   | 4.48E-05   | -28.29460688 |
| chr19 | 45811275 | 45811275 | + | 4.42E-12   | 1.91E-10   | -25.11761156 |
| chr19 | 45816565 | 45816565 | + | 1.12E-13   | 5.70E-12   | -43.34625323 |
| chr19 | 45816758 | 45816758 | + | 0          | 0          | -26.32518539 |
| chr19 | 45854860 | 45854860 | + | 0          | 0          | -25.68058138 |
| chr19 | 45854876 | 45854876 | + | 0          | 0          | -25.42743525 |
| chr19 | 46316023 | 46316023 | + | 0          | 0          | -40.34848485 |
| chr19 | 46455862 | 46455862 | + | 0          | 0          | -28.15943581 |
| chr19 | 46455874 | 46455874 | + | 0          | 0          | -29.13177863 |
| chr19 | 46455890 | 46455890 | + | 0          | 0          | -30.3929086  |
| chr19 | 46470666 | 46470666 | - | 0          | 0          | -25.55780933 |
| chr19 | 46478804 | 46478804 | - | 1.67E-08   | 4.64E-07   | -28.58607409 |
| chr19 | 46507480 | 46507480 | - | 0          | 0          | -32.94645941 |
| chr19 | 46519100 | 46519100 | - | 3.75E-07   | 8.36E-06   | -27.5862069  |
| chr19 | 46530682 | 46530682 | - | 0.00026689 | 0.00293217 | -30.26737968 |
| chr19 | 46531306 | 46531306 | + | 0          | 0          | -43.29889825 |
| chr19 | 46531307 | 46531307 | - | 9.17E-08   | 2.27E-06   | -50.79946702 |
| chr19 | 46531315 | 46531315 | + | 0          | 0          | -37.07072969 |

|       |          |          |   |            |            |              |
|-------|----------|----------|---|------------|------------|--------------|
| chr19 | 46531325 | 46531325 | + | 0          | 0          | -28.2413152  |
| chr19 | 46531335 | 46531335 | + | 0          | 0          | -37.32830788 |
| chr19 | 46531353 | 46531353 | + | 0          | 0          | -43.59452142 |
| chr19 | 46531461 | 46531461 | + | 0          | 0          | -27.26970723 |
| chr19 | 46531462 | 46531462 | - | 0          | 0          | -40.93999908 |
| chr19 | 46531507 | 46531507 | - | 0          | 0          | -26.18136978 |
| chr19 | 46607050 | 46607050 | - | 1.28E-11   | 5.27E-10   | -37.42939799 |
| chr19 | 46618994 | 46618994 | + | 0          | 0          | -32.84868944 |
| chr19 | 46619097 | 46619097 | - | 0          | 0          | -31.06860144 |
| chr19 | 46619114 | 46619114 | - | 0          | 0          | -38.4852865  |
| chr19 | 46619125 | 46619125 | - | 0          | 0          | -37.20270418 |
| chr19 | 46619146 | 46619146 | - | 0          | 0          | -30.5684323  |
| chr19 | 46620299 | 46620299 | + | 0          | 0          | -27.98106149 |
| chr19 | 46622938 | 46622938 | + | 4.52E-07   | 9.91E-06   | -30.47743623 |
| chr19 | 46622939 | 46622939 | - | 0          | 0          | -31.63973586 |
| chr19 | 46622943 | 46622943 | - | 0          | 0          | -38.8525334  |
| chr19 | 46623080 | 46623080 | - | 6.53E-10   | 2.20E-08   | -28.73315364 |
| chr19 | 46671056 | 46671056 | + | 0          | 0          | -27.90516242 |
| chr19 | 46794368 | 46794368 | + | 0          | 0          | -25.66869501 |
| chr19 | 46794369 | 46794369 | - | 0          | 0          | -27.4203549  |
| chr19 | 46856697 | 46856697 | - | 0          | 0          | -27.37046327 |
| chr19 | 46868952 | 46868952 | - | 9.94E-08   | 2.44E-06   | -30.83461391 |
| chr19 | 46990121 | 46990121 | - | 1.19E-07   | 2.89E-06   | -37.58944544 |
| chr19 | 47180022 | 47180022 | - | 0          | 0          | -30.26443585 |
| chr19 | 47202125 | 47202125 | + | 2.93E-12   | 1.29E-10   | -29.19351205 |
| chr19 | 47240025 | 47240025 | + | 0          | 0          | -25.63734336 |
| chr19 | 47240056 | 47240056 | - | 0          | 0          | -27.84696232 |
| chr19 | 47240563 | 47240563 | + | 0          | 0          | -33.81250936 |
| chr19 | 47240606 | 47240606 | - | 0          | 0          | -36.95051761 |
| chr19 | 47328265 | 47328265 | - | 2.80E-07   | 6.39E-06   | -42.35416667 |
| chr19 | 47387542 | 47387542 | + | 0          | 0          | -47.79477625 |
| chr19 | 47413057 | 47413057 | + | 0          | 0          | -33.92014288 |
| chr19 | 47413058 | 47413058 | - | 0          | 0          | -27.07466076 |
| chr19 | 47413078 | 47413078 | - | 0          | 0          | -28.88875784 |
| chr19 | 47413101 | 47413101 | - | 0          | 0          | -32.38484041 |
| chr19 | 47443921 | 47443921 | + | 1.31E-14   | 7.25E-13   | -25.60149102 |
| chr19 | 47444738 | 47444738 | - | 0          | 0          | -30.12930722 |
| chr19 | 47460678 | 47460678 | - | 0          | 0          | -36.20708388 |
| chr19 | 47460870 | 47460870 | - | 0          | 0          | -31.7867909  |
| chr19 | 47782850 | 47782850 | - | 0.00044635 | 0.00452241 | -28.336714   |
| chr19 | 47836807 | 47836807 | + | 0          | 0          | -29.45326279 |

|       |          |          |   |            |            |              |
|-------|----------|----------|---|------------|------------|--------------|
| chr19 | 47836842 | 47836842 | + | 0          | 0          | -28.9112488  |
| chr19 | 47854262 | 47854262 | + | 1.54E-06   | 3.05E-05   | -29.19363538 |
| chr19 | 52922926 | 52922926 | + | 0.0003308  | 0.00351576 | 29.75806452  |
| chr19 | 53087560 | 53087560 | - | 0          | 0          | -27.09068347 |
| chr19 | 53170762 | 53170762 | + | 6.41E-11   | 2.44E-09   | -29.58440297 |
| chr19 | 53216956 | 53216956 | + | 0          | 0          | -32.21512247 |
| chr19 | 53217139 | 53217139 | - | 7.35E-10   | 2.46E-08   | -48.03212851 |
| chr19 | 53217147 | 53217147 | - | 2.50E-12   | 1.11E-10   | -54.0562249  |
| chr19 | 53217155 | 53217155 | - | 4.51E-06   | 8.09E-05   | -31.9200854  |
| chr19 | 53251265 | 53251265 | - | 2.53E-05   | 0.00037853 | -31.33333333 |
| chr19 | 53251275 | 53251275 | - | 0.00100706 | 0.00888208 | -25.92465753 |
| chr19 | 53321481 | 53321481 | + | 0          | 0          | -25.74269191 |
| chr19 | 53437492 | 53437492 | + | 4.50E-14   | 2.37E-12   | -29.38100902 |
| chr19 | 53437541 | 53437541 | - | 0          | 0          | -26.57479111 |
| chr19 | 53437562 | 53437562 | + | 8.55E-15   | 4.81E-13   | -25.32184778 |
| chr19 | 53437563 | 53437563 | - | 0          | 0          | -29.34949526 |
| chr19 | 53437964 | 53437964 | + | 1.63E-08   | 4.54E-07   | -26.5411466  |
| chr19 | 53437972 | 53437972 | - | 0          | 0          | -34.40963855 |
| chr19 | 53437997 | 53437997 | - | 0          | 0          | -33.1205799  |
| chr19 | 53438002 | 53438002 | - | 0          | 0          | -36.56136789 |
| chr19 | 53438019 | 53438019 | - | 0          | 0          | -31.0380689  |
| chr19 | 53538705 | 53538705 | - | 0.00030975 | 0.0033263  | -26.45021645 |
| chr19 | 53557147 | 53557147 | + | 4.44E-16   | 2.79E-14   | -35.12544803 |
| chr19 | 53671000 | 53671000 | - | 0.00070912 | 0.00665178 | -39.96723997 |
| chr19 | 53808220 | 53808220 | - | 4.13E-07   | 9.11E-06   | -34.69387755 |
| chr19 | 53830798 | 53830798 | - | 5.22E-15   | 3.00E-13   | -25.06504371 |
| chr19 | 54114651 | 54114651 | + | 0          | 0          | -35.61711322 |
| chr19 | 54114797 | 54114797 | - | 1.11E-16   | 7.26E-15   | -26.32146335 |
| chr19 | 54778240 | 54778240 | + | 4.08E-05   | 0.00057728 | -28.02839684 |
| chr19 | 55225447 | 55225447 | + | 0.00076035 | 0.0070493  | 29.43589744  |
| chr19 | 55456421 | 55456421 | + | 7.55E-07   | 1.59E-05   | -28.95271643 |
| chr19 | 55456518 | 55456518 | - | 0          | 0          | -31.3026863  |
| chr19 | 55667883 | 55667883 | + | 2.74E-07   | 6.26E-06   | -33.18114875 |
| chr19 | 55694393 | 55694393 | + | 0          | 0          | -31.99751861 |
| chr19 | 55694394 | 55694394 | - | 0          | 0          | -27.66796941 |
| chr19 | 55756918 | 55756918 | - | 7.58E-06   | 0.00012905 | -25.75575221 |
| chr19 | 55807304 | 55807304 | - | 0          | 0          | -40.33276086 |
| chr19 | 55896677 | 55896677 | + | 0          | 0          | -34.88922559 |
| chr19 | 55896687 | 55896687 | + | 0          | 0          | -25.98619802 |
| chr19 | 55896795 | 55896795 | - | 0          | 0          | -32.86984378 |
| chr19 | 56029960 | 56029960 | - | 0          | 0          | -35.4367302  |

|       |          |          |   |            |            |              |
|-------|----------|----------|---|------------|------------|--------------|
| chr19 | 56069559 | 56069559 | + | 0          | 0          | -28.0199586  |
| chr19 | 56320722 | 56320722 | + | 0          | 0          | -29.8467804  |
| chr19 | 56344506 | 56344506 | + | 0          | 0          | -45.5117307  |
| chr19 | 56356914 | 56356914 | - | 1.79E-06   | 3.51E-05   | -26.23032312 |
| chr19 | 56752718 | 56752718 | + | 0          | 0          | -28.60031801 |
| chr19 | 56752764 | 56752764 | - | 7.77E-16   | 4.79E-14   | -26.12890629 |
| chr19 | 57098384 | 57098384 | - | 0.00011595 | 0.00143192 | -25.13673319 |
| chr19 | 57123370 | 57123370 | - | 0          | 0          | -47.73720517 |
| chr19 | 57123405 | 57123405 | - | 0          | 0          | -28.19432073 |
| chr19 | 57330430 | 57330430 | - | 6.86E-08   | 1.73E-06   | -26.0318492  |
| chr19 | 57356027 | 57356027 | - | 2.99E-06   | 5.58E-05   | -25.26483051 |
| chr19 | 57404539 | 57404539 | - | 0          | 0          | -38.36423355 |
| chr19 | 57404552 | 57404552 | - | 0          | 0          | -29.82010374 |
| chr19 | 58061024 | 58061024 | + | 0          | 0          | -33.80328457 |
| chr19 | 58061114 | 58061114 | - | 0          | 0          | -28.3383476  |
| chr19 | 58061127 | 58061127 | - | 0          | 0          | -32.12158065 |
| chr19 | 58246163 | 58246163 | - | 0          | 0          | -25.54073978 |
| chr19 | 58310344 | 58310344 | + | 8.34E-07   | 1.74E-05   | -26.37144493 |
| chr19 | 58930882 | 58930882 | - | 0          | 0          | -25.37666788 |
| chr19 | 58930914 | 58930914 | - | 0          | 0          | -27.68055931 |
| chr19 | 59057872 | 59057872 | + | 0          | 0          | -26.36601076 |
| chr19 | 59057873 | 59057873 | - | 0          | 0          | -27.65209654 |
| chr19 | 59167944 | 59167944 | - | 0          | 0          | -33.18304066 |
| chr19 | 59171450 | 59171450 | - | 6.59E-10   | 2.22E-08   | -27.80966045 |
| chr19 | 61225332 | 61225332 | + | 0          | 0          | -25.54887154 |
| chr19 | 61225393 | 61225393 | - | 0          | 0          | -26.97036649 |
| chr19 | 61225460 | 61225460 | + | 0          | 0          | -26.89686063 |
| chr19 | 61225461 | 61225461 | - | 0          | 0          | -26.49012699 |
| chr19 | 61225535 | 61225535 | + | 6.28E-11   | 2.39E-09   | -25.41654301 |
| chr19 | 61225696 | 61225696 | + | 0          | 0          | -33.02697825 |
| chr2  | 3188982  | 3188982  | - | 1.63E-07   | 3.88E-06   | -25.78156957 |
| chr2  | 4298656  | 4298656  | + | 0          | 0          | -27.38267729 |
| chr2  | 4298738  | 4298738  | - | 0          | 0          | -34.37215848 |
| chr2  | 4392038  | 4392038  | - | 0          | 0          | -26.26193465 |
| chr2  | 4761193  | 4761193  | - | 1.11E-16   | 7.26E-15   | -25.121741   |
| chr2  | 4919698  | 4919698  | + | 2.50E-06   | 4.74E-05   | -25.60660816 |
| chr2  | 5062830  | 5062830  | - | 0          | 0          | -25.42483287 |
| chr2  | 6278728  | 6278728  | - | 6.81E-10   | 2.29E-08   | -28.52564103 |
| chr2  | 6278770  | 6278770  | - | 5.55E-16   | 3.46E-14   | -44.74837662 |
| chr2  | 6428857  | 6428857  | + | 1.31E-06   | 2.64E-05   | -25.79657966 |
| chr2  | 6472164  | 6472164  | + | 2.06E-12   | 9.20E-11   | -26.58738158 |

|      |          |          |   |            |            |              |
|------|----------|----------|---|------------|------------|--------------|
| chr2 | 6532826  | 6532826  | - | 7.89E-05   | 0.00102714 | -29.32692308 |
| chr2 | 6547304  | 6547304  | + | 9.22E-13   | 4.27E-11   | -35.39490783 |
| chr2 | 6547336  | 6547336  | - | 1.70E-09   | 5.45E-08   | -27.42268041 |
| chr2 | 7080808  | 7080808  | - | 5.24E-12   | 2.25E-10   | -32.37075644 |
| chr2 | 7081263  | 7081263  | + | 1.24E-13   | 6.26E-12   | -25.92125475 |
| chr2 | 7089410  | 7089410  | - | 3.07E-05   | 0.00044918 | -36.17951669 |
| chr2 | 9633180  | 9633180  | - | 2.51E-06   | 4.76E-05   | -41.86046512 |
| chr2 | 9867226  | 9867226  | + | 6.40E-12   | 2.72E-10   | -37.37668981 |
| chr2 | 9867257  | 9867257  | + | 2.17E-08   | 5.94E-07   | -31.90490766 |
| chr2 | 9881361  | 9881361  | + | 0          | 0          | -33.60188526 |
| chr2 | 9881362  | 9881362  | - | 0          | 0          | -30.55925064 |
| chr2 | 9884587  | 9884587  | - | 6.50E-08   | 1.65E-06   | -28.86671418 |
| chr2 | 9884619  | 9884619  | + | 5.22E-05   | 0.00071638 | -27.27272727 |
| chr2 | 9884632  | 9884632  | + | 1.16E-05   | 0.00018943 | -44.76190476 |
| chr2 | 9885269  | 9885269  | + | 1.11E-16   | 7.26E-15   | -27.18996508 |
| chr2 | 9885307  | 9885307  | - | 2.22E-16   | 1.43E-14   | -26.77419355 |
| chr2 | 9885344  | 9885344  | + | 3.82E-09   | 1.16E-07   | -26.8722467  |
| chr2 | 9885374  | 9885374  | + | 4.44E-16   | 2.79E-14   | -37.17772693 |
| chr2 | 9885480  | 9885480  | - | 0          | 0          | -26.09295751 |
| chr2 | 10300900 | 10300900 | + | 1.39E-08   | 3.92E-07   | -39.94288046 |
| chr2 | 10300917 | 10300917 | + | 9.01E-05   | 0.00115149 | -27.40471869 |
| chr2 | 10300929 | 10300929 | + | 3.81E-06   | 6.95E-05   | -32.1013289  |
| chr2 | 12189148 | 12189148 | + | 1.53E-07   | 3.64E-06   | -26          |
| chr2 | 12316397 | 12316397 | + | 0.00038236 | 0.00397212 | -29.18181818 |
| chr2 | 13009059 | 13009059 | + | 0          | 0          | -26.94771634 |
| chr2 | 13009539 | 13009539 | + | 0.00024477 | 0.00272264 | -29.87711214 |
| chr2 | 13792783 | 13792783 | + | 3.77E-09   | 1.15E-07   | -28.92107892 |
| chr2 | 17524205 | 17524205 | - | 8.24E-06   | 0.00013899 | -27.86304604 |
| chr2 | 18032163 | 18032163 | - | 0          | 0          | -25.65212677 |
| chr2 | 18039661 | 18039661 | + | 0          | 0          | -44.25894252 |
| chr2 | 18039696 | 18039696 | + | 0          | 0          | -45.12051926 |
| chr2 | 18039713 | 18039713 | + | 0          | 0          | -44.8129938  |
| chr2 | 18039714 | 18039714 | - | 0          | 0          | -34.46784098 |
| chr2 | 18039730 | 18039730 | + | 0          | 0          | -49.29870371 |
| chr2 | 18039731 | 18039731 | - | 0          | 0          | -42.96776047 |
| chr2 | 18039735 | 18039735 | + | 0          | 0          | -30.89992534 |
| chr2 | 18039736 | 18039736 | - | 0          | 0          | -28.43283011 |
| chr2 | 18039740 | 18039740 | + | 0          | 0          | -48.1436736  |
| chr2 | 18039741 | 18039741 | - | 0          | 0          | -51.31186976 |
| chr2 | 18039746 | 18039746 | - | 0          | 0          | -42.50271018 |
| chr2 | 18039748 | 18039748 | + | 0          | 0          | -42.22691208 |



|      |          |          |   |          |          |              |
|------|----------|----------|---|----------|----------|--------------|
| chr2 | 18039749 | 18039749 | - | 0        | 0        | -41.01238938 |
| chr2 | 18039752 | 18039752 | + | 0        | 0        | -46.86491764 |
| chr2 | 18039753 | 18039753 | - | 0        | 0        | -48.93311222 |
| chr2 | 18039754 | 18039754 | + | 0        | 0        | -42.09567758 |
| chr2 | 18039755 | 18039755 | - | 0        | 0        | -43.04511708 |
| chr2 | 18039761 | 18039761 | + | 0        | 0        | -44.16776614 |
| chr2 | 18039762 | 18039762 | - | 0        | 0        | -40.21073045 |
| chr2 | 18039763 | 18039763 | + | 0        | 0        | -49.66696922 |
| chr2 | 18039764 | 18039764 | - | 0        | 0        | -45.83832802 |
| chr2 | 18039790 | 18039790 | + | 0        | 0        | -47.95500623 |
| chr2 | 18039791 | 18039791 | - | 0        | 0        | -43.19935794 |
| chr2 | 18039810 | 18039810 | + | 0        | 0        | -46.22226743 |
| chr2 | 18039811 | 18039811 | - | 0        | 0        | -53.19203269 |
| chr2 | 18039825 | 18039825 | + | 0        | 0        | -35.86368114 |
| chr2 | 18039826 | 18039826 | - | 0        | 0        | -39.32533803 |
| chr2 | 18039829 | 18039829 | + | 0        | 0        | -30.7079646  |
| chr2 | 18039830 | 18039830 | - | 0        | 0        | -36.53494746 |
| chr2 | 18039834 | 18039834 | - | 0        | 0        | -46.95094937 |
| chr2 | 18039850 | 18039850 | + | 0        | 0        | -38.71528959 |
| chr2 | 18039854 | 18039854 | + | 0        | 0        | -39.94152047 |
| chr2 | 18039855 | 18039855 | - | 0        | 0        | -47.15617716 |
| chr2 | 18039859 | 18039859 | + | 0        | 0        | -45.05627053 |
| chr2 | 18039860 | 18039860 | - | 0        | 0        | -57.00319098 |
| chr2 | 18039861 | 18039861 | + | 0        | 0        | -47.68444385 |
| chr2 | 18039862 | 18039862 | - | 2.84E-08 | 7.64E-07 | -29.13000091 |
| chr2 | 18039871 | 18039871 | + | 0        | 0        | -42.23843101 |
| chr2 | 18039872 | 18039872 | - | 0        | 0        | -49.00244798 |
| chr2 | 18039902 | 18039902 | + | 0        | 0        | -46.32362147 |
| chr2 | 18039903 | 18039903 | - | 0        | 0        | -46.98390805 |
| chr2 | 18039908 | 18039908 | + | 0        | 0        | -45.07674376 |
| chr2 | 18039920 | 18039920 | + | 0        | 0        | -28.76411074 |
| chr2 | 18039921 | 18039921 | - | 0        | 0        | -30.91662898 |
| chr2 | 18039945 | 18039945 | + | 0        | 0        | -40.88403503 |
| chr2 | 18039946 | 18039946 | - | 0        | 0        | -45.4442383  |
| chr2 | 18039954 | 18039954 | - | 0        | 0        | -34.8050882  |
| chr2 | 18041287 | 18041287 | + | 0        | 0        | -34.55121395 |
| chr2 | 18041350 | 18041350 | + | 0        | 0        | -29.2939335  |
| chr2 | 18041351 | 18041351 | - | 0        | 0        | -29.16650755 |
| chr2 | 18051727 | 18051727 | - | 0        | 0        | -25.59870615 |
| chr2 | 18051737 | 18051737 | + | 0        | 0        | -31.16257852 |
| chr2 | 18051765 | 18051765 | + | 0        | 0        | -25.41353383 |

|      |          |          |   |            |            |              |
|------|----------|----------|---|------------|------------|--------------|
| chr2 | 18940640 | 18940640 | + | 2.25E-06   | 4.32E-05   | -29.22885572 |
| chr2 | 20249694 | 20249694 | - | 0.00073645 | 0.00686311 | 28.05241215  |
| chr2 | 20521477 | 20521477 | - | 4.39E-12   | 1.90E-10   | -25.18151815 |
| chr2 | 24368078 | 24368078 | - | 5.35E-05   | 0.00073195 | -43.78378378 |
| chr2 | 24405381 | 24405381 | + | 0          | 0          | -34.6513206  |
| chr2 | 24405401 | 24405401 | + | 0          | 0          | -37.2309607  |
| chr2 | 24405402 | 24405402 | - | 0          | 0          | -26.43587226 |
| chr2 | 24405409 | 24405409 | + | 0          | 0          | -41.81887367 |
| chr2 | 24405410 | 24405410 | - | 0          | 0          | -32.63943307 |
| chr2 | 24405436 | 24405436 | - | 0          | 0          | -25.15704706 |
| chr2 | 24776465 | 24776465 | + | 0          | 0          | -33.2397165  |
| chr2 | 25095020 | 25095020 | - | 0          | 0          | -25.82371378 |
| chr2 | 25095487 | 25095487 | + | 0          | 0          | -30.40229707 |
| chr2 | 25095593 | 25095593 | - | 0          | 0          | -26.15961222 |
| chr2 | 25095606 | 25095606 | - | 0          | 0          | -36.2496943  |
| chr2 | 25095624 | 25095624 | - | 0          | 0          | -35.96835607 |
| chr2 | 25095660 | 25095660 | + | 8.88E-16   | 5.45E-14   | -27.92629448 |
| chr2 | 25095661 | 25095661 | - | 0          | 0          | -28.66041344 |
| chr2 | 25095695 | 25095695 | - | 1.44E-12   | 6.56E-11   | -27.97356828 |
| chr2 | 25168792 | 25168792 | - | 1.00E-10   | 3.72E-09   | -38.0625     |
| chr2 | 25243156 | 25243156 | + | 0          | 0          | -25.17510034 |
| chr2 | 25243157 | 25243157 | - | 2.83E-09   | 8.77E-08   | -29.8282519  |
| chr2 | 25243185 | 25243185 | + | 0          | 0          | -32.99696719 |
| chr2 | 25243271 | 25243271 | - | 0          | 0          | -30.71618361 |
| chr2 | 25366308 | 25366308 | - | 0          | 0          | -31.51898768 |
| chr2 | 25536678 | 25536678 | + | 1.46E-06   | 2.90E-05   | -37.63581052 |
| chr2 | 25552642 | 25552642 | - | 0.00036333 | 0.00380521 | -36.36363636 |
| chr2 | 25552669 | 25552669 | - | 0.00068072 | 0.00643254 | -34.38891638 |
| chr2 | 25552704 | 25552704 | + | 3.59E-06   | 6.58E-05   | -27.86666667 |
| chr2 | 25577221 | 25577221 | - | 0          | 0          | -34.00123507 |
| chr2 | 25577371 | 25577371 | - | 0          | 0          | -34.59093785 |
| chr2 | 26061221 | 26061221 | + | 0.00028185 | 0.00307186 | -29.60199005 |
| chr2 | 26061225 | 26061225 | + | 0.00066768 | 0.00633025 | -27.08481825 |
| chr2 | 26122088 | 26122088 | + | 0          | 0          | -46.29580989 |
| chr2 | 26122250 | 26122250 | + | 0          | 0          | -31.80929095 |
| chr2 | 26122272 | 26122272 | + | 0          | 0          | -38.70722677 |
| chr2 | 26167977 | 26167977 | + | 0.00048189 | 0.00482361 | -44.20062696 |
| chr2 | 26316326 | 26316326 | - | 0.00012343 | 0.00151191 | -37.41562199 |
| chr2 | 26494000 | 26494000 | - | 0          | 0          | -32.91758376 |
| chr2 | 26549988 | 26549988 | + | 0          | 0          | -25.03163595 |
| chr2 | 26549991 | 26549991 | + | 0          | 0          | -31.7556972  |

|      |          |          |   |            |            |              |
|------|----------|----------|---|------------|------------|--------------|
| chr2 | 26550026 | 26550026 | + | 0          | 0          | -26.18734207 |
| chr2 | 26576111 | 26576111 | - | 0          | 0          | -28.98495786 |
| chr2 | 26576145 | 26576145 | - | 0          | 0          | -28.05074924 |
| chr2 | 26585589 | 26585589 | + | 0          | 0          | -29.45173294 |
| chr2 | 26585603 | 26585603 | + | 0          | 0          | -50.42833267 |
| chr2 | 26585663 | 26585663 | - | 0          | 0          | -52.05554387 |
| chr2 | 26585667 | 26585667 | - | 0          | 0          | -53.78863985 |
| chr2 | 26662414 | 26662414 | + | 6.46E-06   | 0.00011174 | -33.57712766 |
| chr2 | 27096411 | 27096411 | + | 0          | 0          | -26.51086816 |
| chr2 | 27192238 | 27192238 | - | 1.46E-07   | 3.49E-06   | -61.47978642 |
| chr2 | 27210381 | 27210381 | + | 0          | 0          | -32.11705064 |
| chr2 | 27210406 | 27210406 | + | 0          | 0          | -30.28375986 |
| chr2 | 27324768 | 27324768 | - | 1.27E-07   | 3.07E-06   | -28.14965066 |
| chr2 | 27425364 | 27425364 | + | 0          | 0          | -30.9854751  |
| chr2 | 27425365 | 27425365 | - | 0          | 0          | -26.87184343 |
| chr2 | 27473941 | 27473941 | + | 0          | 0          | -27.58668699 |
| chr2 | 27505730 | 27505730 | + | 0          | 0          | -29.08226473 |
| chr2 | 27650352 | 27650352 | - | 0          | 0          | -29.9513623  |
| chr2 | 27739888 | 27739888 | + | 1.45E-12   | 6.58E-11   | -32.52168884 |
| chr2 | 27739903 | 27739903 | + | 1.60E-11   | 6.52E-10   | -30.96615951 |
| chr2 | 27739907 | 27739907 | + | 0          | 0          | -42.88818988 |
| chr2 | 27739918 | 27739918 | + | 0          | 0          | -40.21814007 |
| chr2 | 27759487 | 27759487 | + | 1.75E-05   | 0.00027294 | -25.10067114 |
| chr2 | 27762819 | 27762819 | + | 0          | 0          | -29.38113413 |
| chr2 | 27955166 | 27955166 | - | 1.04E-10   | 3.86E-09   | -28.52313457 |
| chr2 | 28532659 | 28532659 | - | 0          | 0          | -25.84271068 |
| chr2 | 28536627 | 28536627 | + | 1.11E-16   | 7.26E-15   | -28.31196581 |
| chr2 | 28598643 | 28598643 | + | 0.00018697 | 0.00216346 | -30.96761295 |
| chr2 | 28751139 | 28751139 | + | 0          | 0          | -31.59092584 |
| chr2 | 29041234 | 29041234 | + | 0          | 0          | -30.75301782 |
| chr2 | 29041263 | 29041263 | + | 0          | 0          | -34.10449238 |
| chr2 | 29195636 | 29195636 | - | 0          | 0          | -27.57417103 |
| chr2 | 29206256 | 29206256 | + | 0          | 0          | -25.03684041 |
| chr2 | 29206355 | 29206355 | - | 0          | 0          | -27.30408314 |
| chr2 | 29206374 | 29206374 | - | 0          | 0          | -30.32819685 |
| chr2 | 29250163 | 29250163 | + | 4.84E-11   | 1.87E-09   | -27.84389928 |
| chr2 | 29250173 | 29250173 | + | 2.91E-14   | 1.56E-12   | -34.89546629 |
| chr2 | 29678002 | 29678002 | + | 0          | 0          | -39.33720346 |
| chr2 | 29678007 | 29678007 | + | 0          | 0          | -44.15082117 |
| chr2 | 29678008 | 29678008 | - | 0          | 0          | -30.1180891  |
| chr2 | 29678043 | 29678043 | - | 0          | 0          | -26.00546862 |

|      |          |          |   |            |            |              |
|------|----------|----------|---|------------|------------|--------------|
| chr2 | 29845125 | 29845125 | + | 3.09E-11   | 1.22E-09   | -44.39935065 |
| chr2 | 29845347 | 29845347 | + | 0.00011369 | 0.00140785 | -28.55902778 |
| chr2 | 29845355 | 29845355 | + | 4.66E-08   | 1.21E-06   | -40.13221154 |
| chr2 | 29845366 | 29845366 | + | 2.91E-05   | 0.00042766 | -31.35289907 |
| chr2 | 29845367 | 29845367 | - | 0.00058028 | 0.00563407 | -30.51948052 |
| chr2 | 29845373 | 29845373 | + | 0          | 0          | -27.1209603  |
| chr2 | 29845379 | 29845379 | + | 0          | 0          | -29.60876683 |
| chr2 | 29845398 | 29845398 | + | 0          | 0          | -29.11706047 |
| chr2 | 29845399 | 29845399 | - | 0          | 0          | -26.5735048  |
| chr2 | 29845407 | 29845407 | + | 0          | 0          | -31.5137468  |
| chr2 | 29845441 | 29845441 | - | 0          | 0          | -29.55336613 |
| chr2 | 29845461 | 29845461 | + | 0          | 0          | -26.02357217 |
| chr2 | 29845466 | 29845466 | + | 0          | 0          | -27.85596863 |
| chr2 | 29845475 | 29845475 | + | 0          | 0          | -28.54968749 |
| chr2 | 29845515 | 29845515 | - | 0          | 0          | -26.50739628 |
| chr2 | 29845572 | 29845572 | - | 0          | 0          | -31.28198049 |
| chr2 | 29845586 | 29845586 | + | 0          | 0          | -26.58761528 |
| chr2 | 29845609 | 29845609 | + | 0          | 0          | -29.95028511 |
| chr2 | 29845610 | 29845610 | - | 0          | 0          | -29.80065186 |
| chr2 | 29845618 | 29845618 | + | 0          | 0          | -33.9702075  |
| chr2 | 29845619 | 29845619 | - | 0          | 0          | -29.97195482 |
| chr2 | 29845667 | 29845667 | + | 0          | 0          | -28.60135298 |
| chr2 | 29845683 | 29845683 | + | 0          | 0          | -28.63962519 |
| chr2 | 29845697 | 29845697 | - | 0          | 0          | -25.76414011 |
| chr2 | 29845715 | 29845715 | - | 0          | 0          | -26.89876835 |
| chr2 | 29845737 | 29845737 | + | 0          | 0          | -29.07155399 |
| chr2 | 29845787 | 29845787 | + | 0          | 0          | -29.39624329 |
| chr2 | 29845822 | 29845822 | - | 0          | 0          | -32.4056353  |
| chr2 | 29845829 | 29845829 | - | 0          | 0          | -28.1047343  |
| chr2 | 29845841 | 29845841 | - | 0          | 0          | -29.25559061 |
| chr2 | 29845896 | 29845896 | + | 1.28E-13   | 6.43E-12   | -25.75639544 |
| chr2 | 29846022 | 29846022 | - | 0          | 0          | -39.35891173 |
| chr2 | 29846048 | 29846048 | - | 0          | 0          | -34.47890819 |
| chr2 | 29846138 | 29846138 | - | 0          | 0          | -28.88094751 |
| chr2 | 29846142 | 29846142 | - | 0          | 0          | -30.5231163  |
| chr2 | 29846155 | 29846155 | + | 0          | 0          | -35.24926494 |
| chr2 | 29846183 | 29846183 | + | 0          | 0          | -36.23490894 |
| chr2 | 29846184 | 29846184 | - | 0          | 0          | -36.26603216 |
| chr2 | 29846206 | 29846206 | - | 0          | 0          | -38.79420497 |
| chr2 | 29846216 | 29846216 | - | 0          | 0          | -30.67962205 |
| chr2 | 29846269 | 29846269 | + | 0          | 0          | -38.39552284 |

|      |          |          |   |          |          |              |
|------|----------|----------|---|----------|----------|--------------|
| chr2 | 29846277 | 29846277 | + | 0        | 0        | -33.14047422 |
| chr2 | 29846278 | 29846278 | - | 0        | 0        | -29.77348794 |
| chr2 | 29846282 | 29846282 | + | 0        | 0        | -29.64525643 |
| chr2 | 29846283 | 29846283 | - | 0        | 0        | -29.58721317 |
| chr2 | 29846300 | 29846300 | + | 0        | 0        | -29.70153571 |
| chr2 | 29846301 | 29846301 | - | 0        | 0        | -25.20034476 |
| chr2 | 29846304 | 29846304 | + | 0        | 0        | -33.60771862 |
| chr2 | 29846305 | 29846305 | - | 0        | 0        | -33.5522735  |
| chr2 | 29846314 | 29846314 | - | 0        | 0        | -32.09999065 |
| chr2 | 29846324 | 29846324 | + | 8.28E-10 | 2.76E-08 | -26.10789981 |
| chr2 | 29846345 | 29846345 | + | 5.08E-11 | 1.96E-09 | -28.0347333  |
| chr2 | 29846358 | 29846358 | + | 1.31E-11 | 5.37E-10 | -29.36381357 |
| chr2 | 29846367 | 29846367 | + | 0        | 0        | -42.0890937  |
| chr2 | 29846369 | 29846369 | + | 5.58E-10 | 1.90E-08 | -31.53704838 |
| chr2 | 30406612 | 30406612 | - | 0        | 0        | -26.23767613 |
| chr2 | 30534859 | 30534859 | - | 6.23E-11 | 2.37E-09 | -30.49613281 |
| chr2 | 30567752 | 30567752 | + | 0        | 0        | -28.64013615 |
| chr2 | 30606936 | 30606936 | + | 0        | 0        | -32.47580777 |
| chr2 | 30606937 | 30606937 | - | 0        | 0        | -31.36447129 |
| chr2 | 30606951 | 30606951 | + | 0        | 0        | -26.1053757  |
| chr2 | 30606952 | 30606952 | - | 0        | 0        | -27.78992603 |
| chr2 | 30606966 | 30606966 | + | 0        | 0        | -33.90763281 |
| chr2 | 30613728 | 30613728 | + | 0        | 0        | -35.81625442 |
| chr2 | 30613831 | 30613831 | - | 0        | 0        | -40.72351421 |
| chr2 | 30613842 | 30613842 | - | 0        | 0        | -27.61369904 |
| chr2 | 30613848 | 30613848 | - | 0        | 0        | -26.76760113 |
| chr2 | 30626124 | 30626124 | - | 1.63E-06 | 3.22E-05 | -29.41328509 |
| chr2 | 30642874 | 30642874 | + | 0        | 0        | -28.55935997 |
| chr2 | 30642875 | 30642875 | - | 0        | 0        | -37.29102113 |
| chr2 | 30652625 | 30652625 | + | 1.43E-14 | 7.90E-13 | -29.13907285 |
| chr2 | 30652644 | 30652644 | + | 0        | 0        | -37.78562421 |
| chr2 | 30652669 | 30652669 | + | 4.33E-15 | 2.51E-13 | -32.41025641 |
| chr2 | 30652778 | 30652778 | - | 0        | 0        | -27.65495208 |
| chr2 | 30687413 | 30687413 | - | 1.24E-14 | 6.89E-13 | -25.46165884 |
| chr2 | 30687448 | 30687448 | - | 1.57E-14 | 8.60E-13 | -26.22399685 |
| chr2 | 30722238 | 30722238 | + | 0        | 0        | -33.16824139 |
| chr2 | 30722239 | 30722239 | - | 0        | 0        | -41.8254733  |
| chr2 | 30726108 | 30726108 | - | 3.11E-15 | 1.82E-13 | -41.08624856 |
| chr2 | 30744039 | 30744039 | + | 0        | 0        | -29.53825408 |
| chr2 | 30744152 | 30744152 | - | 0        | 0        | -30.50462601 |
| chr2 | 30744304 | 30744304 | - | 0        | 0        | -28.81000027 |

|      |          |          |   |            |            |              |
|------|----------|----------|---|------------|------------|--------------|
| chr2 | 30753479 | 30753479 | + | 0          | 0          | -25.71826314 |
| chr2 | 30753487 | 30753487 | + | 0          | 0          | -32.48847366 |
| chr2 | 30753497 | 30753497 | + | 0          | 0          | -36.79833579 |
| chr2 | 30773273 | 30773273 | - | 4.09E-10   | 1.42E-08   | -39.52140209 |
| chr2 | 30801972 | 30801972 | - | 0.00070943 | 0.00665426 | -25.24534206 |
| chr2 | 30902752 | 30902752 | - | 0          | 0          | -37.44802313 |
| chr2 | 30902757 | 30902757 | - | 0          | 0          | -30.60200168 |
| chr2 | 30902935 | 30902935 | - | 0          | 0          | -42.46508209 |
| chr2 | 31049516 | 31049516 | - | 2.99E-07   | 6.78E-06   | -29.76897333 |
| chr2 | 31049769 | 31049769 | - | 7.89E-09   | 2.30E-07   | -42.12570621 |
| chr2 | 31049786 | 31049786 | - | 0.00109338 | 0.00949771 | -26.97557471 |
| chr2 | 31049797 | 31049797 | - | 4.13E-07   | 9.13E-06   | -40.18361582 |
| chr2 | 31049809 | 31049809 | - | 5.79E-08   | 1.48E-06   | -44.07796102 |
| chr2 | 31049816 | 31049816 | - | 8.37E-11   | 3.14E-09   | -52.31285311 |
| chr2 | 31090464 | 31090464 | + | 0          | 0          | -28.3007528  |
| chr2 | 31262949 | 31262949 | + | 5.88E-15   | 3.37E-13   | -36.21168305 |
| chr2 | 31808472 | 31808472 | + | 9.82E-06   | 0.00016275 | -29.54199763 |
| chr2 | 31808498 | 31808498 | + | 0          | 0          | -27.56561147 |
| chr2 | 31808513 | 31808513 | + | 0          | 0          | -33.13698389 |
| chr2 | 31808521 | 31808521 | + | 0          | 0          | -30.63376978 |
| chr2 | 31808535 | 31808535 | + | 0          | 0          | -32.26662973 |
| chr2 | 31808536 | 31808536 | - | 0          | 0          | -30.32769384 |
| chr2 | 31808548 | 31808548 | + | 0          | 0          | -30.80429439 |
| chr2 | 31808549 | 31808549 | - | 0          | 0          | -30.96904552 |
| chr2 | 31808558 | 31808558 | - | 0          | 0          | -25.06073929 |
| chr2 | 31808581 | 31808581 | + | 0          | 0          | -29.85403221 |
| chr2 | 31808582 | 31808582 | - | 0          | 0          | -26.80359578 |
| chr2 | 31808624 | 31808624 | + | 0          | 0          | -40.14392041 |
| chr2 | 31808661 | 31808661 | - | 0          | 0          | -28.94333225 |
| chr2 | 31808676 | 31808676 | - | 0          | 0          | -38.02547265 |
| chr2 | 31808693 | 31808693 | - | 0          | 0          | -35.38111151 |
| chr2 | 31808699 | 31808699 | + | 0          | 0          | -26.70724565 |
| chr2 | 31808700 | 31808700 | - | 0          | 0          | -34.65982411 |
| chr2 | 31808905 | 31808905 | + | 2.96E-14   | 1.59E-12   | -29.04387389 |
| chr2 | 31808906 | 31808906 | - | 1.44E-07   | 3.46E-06   | -39.60573477 |
| chr2 | 31858853 | 31858853 | + | 0          | 0          | -26.92154494 |
| chr2 | 32089021 | 32089021 | - | 0          | 0          | -30.4191927  |
| chr2 | 32153566 | 32153566 | + | 0          | 0          | -34.63768116 |
| chr2 | 32153570 | 32153570 | + | 0          | 0          | -36.55678645 |
| chr2 | 32153601 | 32153601 | + | 0          | 0          | -27.67756353 |
| chr2 | 32153602 | 32153602 | - | 8.31E-11   | 3.12E-09   | -28.30008654 |

|      |          |          |   |          |            |              |
|------|----------|----------|---|----------|------------|--------------|
| chr2 | 32153647 | 32153647 | - | 1.91E-11 | 7.69E-10   | -28.75761076 |
| chr2 | 32539809 | 32539809 | - | 2.17E-06 | 4.17E-05   | -30.58608059 |
| chr2 | 32609197 | 32609197 | + | 0        | 0          | -37.16528774 |
| chr2 | 32609267 | 32609267 | - | 2.49E-08 | 6.74E-07   | -26.76982592 |
| chr2 | 32609290 | 32609290 | + | 2.26E-11 | 9.04E-10   | -31.0836278  |
| chr2 | 32609291 | 32609291 | - | 6.23E-07 | 1.33E-05   | -29.31067588 |
| chr2 | 32610160 | 32610160 | + | 1.61E-05 | 0.00025356 | -26.36015326 |
| chr2 | 32656105 | 32656105 | - | 6.40E-08 | 1.63E-06   | -27.13385186 |
| chr2 | 32741510 | 32741510 | + | 0        | 0          | -45.67370079 |
| chr2 | 32741514 | 32741514 | + | 0        | 0          | -41.62080349 |
| chr2 | 32741521 | 32741521 | + | 0        | 0          | -42.4442465  |
| chr2 | 32741522 | 32741522 | - | 0        | 0          | -45.89633211 |
| chr2 | 32741523 | 32741523 | + | 0        | 0          | -43.09323826 |
| chr2 | 32741524 | 32741524 | - | 0        | 0          | -48.05824189 |
| chr2 | 32741537 | 32741537 | + | 0        | 0          | -41.97161757 |
| chr2 | 32741538 | 32741538 | - | 0        | 0          | -48.8772193  |
| chr2 | 32741541 | 32741541 | + | 0        | 0          | -43.00227356 |
| chr2 | 32741542 | 32741542 | - | 0        | 0          | -45.63027199 |
| chr2 | 32741555 | 32741555 | + | 0        | 0          | -37.45201717 |
| chr2 | 32741556 | 32741556 | - | 0        | 0          | -39.87245696 |
| chr2 | 32741559 | 32741559 | + | 0        | 0          | -41.72783871 |
| chr2 | 32741560 | 32741560 | - | 0        | 0          | -47.42476692 |
| chr2 | 32741568 | 32741568 | + | 0        | 0          | -25.2482444  |
| chr2 | 32741569 | 32741569 | - | 0        | 0          | -31.4889326  |
| chr2 | 32741581 | 32741581 | + | 0        | 0          | -34.28734843 |
| chr2 | 32741592 | 32741592 | + | 0        | 0          | -34.50420572 |
| chr2 | 32741596 | 32741596 | + | 0        | 0          | -34.02359992 |
| chr2 | 32741615 | 32741615 | + | 0        | 0          | -34.85913521 |
| chr2 | 32741645 | 32741645 | - | 2.22E-15 | 1.32E-13   | -26.15719167 |
| chr2 | 32741652 | 32741652 | - | 0        | 0          | -34.55387622 |
| chr2 | 32741678 | 32741678 | - | 0        | 0          | -30.50069129 |
| chr2 | 32741690 | 32741690 | + | 0        | 0          | -26.35431354 |
| chr2 | 32741691 | 32741691 | - | 0        | 0          | -31.63860831 |
| chr2 | 32741743 | 32741743 | - | 0        | 0          | -28.4334379  |
| chr2 | 32741751 | 32741751 | - | 0        | 0          | -39.27452241 |
| chr2 | 32741760 | 32741760 | - | 0        | 0          | -26.3611035  |
| chr2 | 32776359 | 32776359 | + | 0        | 0          | -28.63079746 |
| chr2 | 32874981 | 32874981 | - | 2.45E-10 | 8.71E-09   | -25.39128355 |
| chr2 | 32888555 | 32888555 | + | 5.58E-13 | 2.64E-11   | -27.44176943 |
| chr2 | 33169839 | 33169839 | + | 2.94E-10 | 1.04E-08   | -26.79971103 |
| chr2 | 33178400 | 33178400 | + | 5.54E-10 | 1.89E-08   | -30.33914909 |

|      |          |          |   |            |            |              |
|------|----------|----------|---|------------|------------|--------------|
| chr2 | 33216722 | 33216722 | + | 3.22E-15   | 1.89E-13   | -32.75229875 |
| chr2 | 33216734 | 33216734 | + | 0          | 0          | -51.06526632 |
| chr2 | 33216735 | 33216735 | - | 0          | 0          | -52.29477961 |
| chr2 | 33216752 | 33216752 | + | 0          | 0          | -36.00253131 |
| chr2 | 33216753 | 33216753 | - | 3.14E-14   | 1.68E-12   | -32.28251864 |
| chr2 | 33216776 | 33216776 | + | 0          | 0          | -37.75115207 |
| chr2 | 33216806 | 33216806 | - | 0          | 0          | -48.55789927 |
| chr2 | 33216846 | 33216846 | - | 0          | 0          | -43.87078439 |
| chr2 | 33575575 | 33575575 | + | 0          | 0          | -25.10204819 |
| chr2 | 33575617 | 33575617 | + | 0          | 0          | -30.65815772 |
| chr2 | 33593200 | 33593200 | - | 7.34E-13   | 3.44E-11   | -35.0369428  |
| chr2 | 33616239 | 33616239 | + | 2.25E-05   | 0.00034102 | -38.45598846 |
| chr2 | 33625491 | 33625491 | + | 0          | 0          | -28.32440101 |
| chr2 | 33639976 | 33639976 | + | 9.98E-06   | 0.00016515 | -35.3821907  |
| chr2 | 33794765 | 33794765 | - | 4.55E-13   | 2.17E-11   | -25.09725298 |
| chr2 | 33822717 | 33822717 | + | 0          | 0          | -25.51740338 |
| chr2 | 33877896 | 33877896 | + | 0.00089723 | 0.00807938 | -38.63636364 |
| chr2 | 33919821 | 33919821 | + | 0          | 0          | -44.32772934 |
| chr2 | 33919963 | 33919963 | - | 0          | 0          | -33.68603259 |
| chr2 | 33919981 | 33919981 | - | 0          | 0          | -36.55437226 |
| chr2 | 33920494 | 33920494 | + | 0          | 0          | -35.12053256 |
| chr2 | 33920497 | 33920497 | + | 0          | 0          | -29.23541785 |
| chr2 | 33920511 | 33920511 | + | 0          | 0          | -28.60410831 |
| chr2 | 33920591 | 33920591 | - | 0          | 0          | -38.94700594 |
| chr2 | 33967027 | 33967027 | + | 0          | 0          | -30.17093703 |
| chr2 | 34031200 | 34031200 | + | 0          | 0          | -27.1746936  |
| chr2 | 34031223 | 34031223 | + | 0          | 0          | -26.31915365 |
| chr2 | 34639229 | 34639229 | + | 2.43E-05   | 0.00036486 | -47.05128205 |
| chr2 | 34645065 | 34645065 | - | 2.22E-16   | 1.43E-14   | -26.00566442 |
| chr2 | 34645068 | 34645068 | + | 0          | 0          | -25.96561526 |
| chr2 | 34645075 | 34645075 | + | 0          | 0          | -28.535597   |
| chr2 | 34645080 | 34645080 | + | 0          | 0          | -26.73483287 |
| chr2 | 34645096 | 34645096 | + | 0          | 0          | -25.67843001 |
| chr2 | 34645106 | 34645106 | + | 0          | 0          | -25.48531243 |
| chr2 | 34645203 | 34645203 | - | 0          | 0          | -27.49988517 |
| chr2 | 34874458 | 34874458 | + | 3.10E-13   | 1.51E-11   | -25.17640254 |
| chr2 | 34958402 | 34958402 | - | 1.80E-05   | 0.00027984 | -28.35503588 |
| chr2 | 34958415 | 34958415 | - | 4.24E-08   | 1.11E-06   | -37.03030303 |
| chr2 | 34983007 | 34983007 | + | 0          | 0          | -30.08444023 |
| chr2 | 34983008 | 34983008 | - | 2.38E-11   | 9.51E-10   | -34.81867361 |
| chr2 | 35432769 | 35432769 | + | 9.18E-08   | 2.27E-06   | -28.84070295 |



|      |          |          |   |           |            |              |
|------|----------|----------|---|-----------|------------|--------------|
| chr2 | 35447245 | 35447245 | + | 8.29E-05  | 0.00107109 | -34.0651801  |
| chr2 | 35449773 | 35449773 | + | 0         | 0          | -27.25298332 |
| chr2 | 35449915 | 35449915 | - | 0         | 0          | -25.44807478 |
| chr2 | 35490709 | 35490709 | - | 0         | 0          | -36.39705882 |
| chr2 | 35490732 | 35490732 | - | 0         | 0          | -38.79647718 |
| chr2 | 35556554 | 35556554 | - | 5.72E-14  | 2.98E-12   | -28.90017825 |
| chr2 | 35588409 | 35588409 | - | 0         | 0          | -26.45505928 |
| chr2 | 35623024 | 35623024 | + | 0         | 0          | -26.88799006 |
| chr2 | 35663218 | 35663218 | + | 0         | 0          | -32.77734068 |
| chr2 | 35663219 | 35663219 | - | 0         | 0          | -26.0218223  |
| chr2 | 35692083 | 35692083 | - | 4.22E-07  | 9.30E-06   | -44.11764706 |
| chr2 | 35695282 | 35695282 | - | 9.58E-10  | 3.17E-08   | -25.36989796 |
| chr2 | 35760564 | 35760564 | + | 8.36E-14  | 4.29E-12   | -26.84176112 |
| chr2 | 35944885 | 35944885 | - | 5.72E-10  | 1.95E-08   | -25.02520972 |
| chr2 | 35944905 | 35944905 | - | 0         | 0          | -28.14955303 |
| chr2 | 35944944 | 35944944 | - | 0         | 0          | -28.20098316 |
| chr2 | 36211838 | 36211838 | + | 0         | 0          | -25.55727268 |
| chr2 | 36211839 | 36211839 | - | 0         | 0          | -28.29957093 |
| chr2 | 37758490 | 37758490 | + | 0         | 0          | -44.01133763 |
| chr2 | 37758496 | 37758496 | + | 0         | 0          | -49.38121323 |
| chr2 | 37758625 | 37758625 | - | 0         | 0          | -45.79835154 |
| chr2 | 37758637 | 37758637 | - | 0         | 0          | -48.77078237 |
| chr2 | 37758669 | 37758669 | - | 0         | 0          | -44.40247678 |
| chr2 | 37758672 | 37758672 | + | 0         | 0          | -38.96375234 |
| chr2 | 37758673 | 37758673 | - | 0         | 0          | -42.60435346 |
| chr2 | 37758711 | 37758711 | + | 0         | 0          | -29.02820953 |
| chr2 | 37758712 | 37758712 | - | 0         | 0          | -28.28378444 |
| chr2 | 37758714 | 37758714 | + | 0         | 0          | -33.20016362 |
| chr2 | 37758715 | 37758715 | - | 0         | 0          | -34.41879136 |
| chr2 | 37758727 | 37758727 | - | 0         | 0          | -56.4524393  |
| chr2 | 37767137 | 37767137 | + | 0         | 0          | -27.46361369 |
| chr2 | 37767435 | 37767435 | + | 0         | 0          | -30.85395467 |
| chr2 | 37776197 | 37776197 | + | 0         | 0          | -40.7156411  |
| chr2 | 37776198 | 37776198 | - | 0.0006034 | 0.00581973 | -37.5        |
| chr2 | 37776202 | 37776202 | + | 0         | 0          | -33.60868561 |
| chr2 | 37776228 | 37776228 | + | 0         | 0          | -33.25320706 |
| chr2 | 37776229 | 37776229 | - | 2.87E-05  | 0.00042344 | -45.84210526 |
| chr2 | 37776245 | 37776245 | + | 0         | 0          | -46.15607487 |
| chr2 | 37776266 | 37776266 | + | 0         | 0          | -43.32473898 |
| chr2 | 37776274 | 37776274 | + | 0         | 0          | -48.48957124 |
| chr2 | 37776276 | 37776276 | + | 0         | 0          | -37.80925276 |

|      |          |          |   |            |            |              |
|------|----------|----------|---|------------|------------|--------------|
| chr2 | 37776284 | 37776284 | - | 0          | 0          | -37.34254992 |
| chr2 | 37776287 | 37776287 | - | 0          | 0          | -40.50832511 |
| chr2 | 37776302 | 37776302 | - | 0          | 0          | -45.79494061 |
| chr2 | 37776333 | 37776333 | + | 0          | 0          | -31.13634364 |
| chr2 | 37776334 | 37776334 | - | 0          | 0          | -36.58759575 |
| chr2 | 37776345 | 37776345 | + | 0          | 0          | -33.10834231 |
| chr2 | 37776441 | 37776441 | + | 0          | 0          | -43.31296974 |
| chr2 | 37776474 | 37776474 | + | 0          | 0          | -42.05502717 |
| chr2 | 37776475 | 37776475 | - | 0          | 0          | -39.18132129 |
| chr2 | 37776524 | 37776524 | + | 0          | 0          | -37.71019859 |
| chr2 | 37776551 | 37776551 | + | 0          | 0          | -52.81094527 |
| chr2 | 37776766 | 37776766 | + | 0          | 0          | -35.94456702 |
| chr2 | 37776767 | 37776767 | - | 0          | 0          | -31.78306725 |
| chr2 | 37776825 | 37776825 | - | 0          | 0          | -38.12424212 |
| chr2 | 37776863 | 37776863 | - | 0          | 0          | -27.79747833 |
| chr2 | 37776873 | 37776873 | + | 0          | 0          | -34.74037629 |
| chr2 | 37776914 | 37776914 | - | 1.93E-14   | 1.05E-12   | -29.73703733 |
| chr2 | 37776936 | 37776936 | + | 0          | 0          | -27.36086373 |
| chr2 | 37776937 | 37776937 | - | 0          | 0          | -32.45934033 |
| chr2 | 37777090 | 37777090 | - | 7.43E-05   | 0.00097462 | -35.59705716 |
| chr2 | 37777103 | 37777103 | + | 1.13E-10   | 4.18E-09   | -33.19250971 |
| chr2 | 37777128 | 37777128 | + | 2.98E-08   | 7.98E-07   | -28.45880524 |
| chr2 | 37793759 | 37793759 | - | 0          | 0          | -26.29688383 |
| chr2 | 38360070 | 38360070 | - | 0.0011319  | 0.00976928 | -25.19797276 |
| chr2 | 38367339 | 38367339 | - | 0          | 0          | -36.95486619 |
| chr2 | 38375991 | 38375991 | - | 0          | 0          | -28.20196376 |
| chr2 | 38512992 | 38512992 | + | 0          | 0          | -33.13207051 |
| chr2 | 38513084 | 38513084 | - | 9.84E-11   | 3.67E-09   | -50          |
| chr2 | 38513133 | 38513133 | - | 6.50E-07   | 1.38E-05   | -37.56140351 |
| chr2 | 38517060 | 38517060 | - | 1.34E-11   | 5.51E-10   | -27.53218196 |
| chr2 | 45020169 | 45020169 | - | 0          | 0          | -30.51001821 |
| chr2 | 45020197 | 45020197 | - | 4.44E-16   | 2.79E-14   | -26.48418491 |
| chr2 | 45098086 | 45098086 | + | 1.09E-05   | 0.00017881 | -26.42257463 |
| chr2 | 45098230 | 45098230 | - | 3.69E-08   | 9.74E-07   | -32.88515406 |
| chr2 | 45106300 | 45106300 | + | 0          | 0          | -26.01971143 |
| chr2 | 45106424 | 45106424 | - | 0          | 0          | -29.88736965 |
| chr2 | 45787990 | 45787990 | + | 0.00103856 | 0.00910935 | -26.32779407 |
| chr2 | 45788092 | 45788092 | + | 4.52E-07   | 9.92E-06   | -26.57526658 |
| chr2 | 45788093 | 45788093 | - | 0          | 0          | -27.31558424 |
| chr2 | 49729076 | 49729076 | + | 9.45E-05   | 0.00120022 | -25.34873583 |
| chr2 | 49909576 | 49909576 | + | 1.47E-07   | 3.51E-06   | -35.47473868 |

|      |          |          |   |            |            |              |
|------|----------|----------|---|------------|------------|--------------|
| chr2 | 49909744 | 49909744 | - | 0          | 0          | -35.46315427 |
| chr2 | 50688097 | 50688097 | - | 1.37E-10   | 5.03E-09   | -40.11203752 |
| chr2 | 50690396 | 50690396 | - | 0          | 0          | -31.86823376 |
| chr2 | 51146120 | 51146120 | + | 2.93E-09   | 9.07E-08   | -27.00027245 |
| chr2 | 52634443 | 52634443 | + | 0.00012631 | 0.00154259 | -32.73809524 |
| chr2 | 52928195 | 52928195 | + | 2.18E-05   | 0.00033151 | -26.8907563  |
| chr2 | 52942990 | 52942990 | - | 0          | 0          | -29.61332739 |
| chr2 | 57109190 | 57109190 | + | 1.45E-06   | 2.88E-05   | -37.39495798 |
| chr2 | 57109202 | 57109202 | + | 5.10E-05   | 0.00070153 | -31.16818558 |
| chr2 | 57109408 | 57109408 | - | 4.56E-05   | 0.00063707 | -26.71451356 |
| chr2 | 57110271 | 57110271 | + | 1.46E-06   | 2.91E-05   | -30.61417323 |
| chr2 | 57110493 | 57110493 | - | 9.08E-07   | 1.88E-05   | -27.38636364 |
| chr2 | 57112226 | 57112226 | + | 2.47E-06   | 4.69E-05   | -53.11004785 |
| chr2 | 58516111 | 58516111 | + | 0          | 0          | -29.32165351 |
| chr2 | 58516150 | 58516150 | + | 0          | 0          | -40.6905071  |
| chr2 | 58516151 | 58516151 | - | 0          | 0          | -33.77091209 |
| chr2 | 58516221 | 58516221 | - | 3.13E-11   | 1.23E-09   | -38.69047619 |
| chr2 | 58516226 | 58516226 | - | 6.06E-09   | 1.79E-07   | -33.67903399 |
| chr2 | 59162532 | 59162532 | - | 5.03E-09   | 1.51E-07   | -29.58333333 |
| chr2 | 59648711 | 59648711 | - | 0          | 0          | -37.28894649 |
| chr2 | 59706899 | 59706899 | + | 0          | 0          | -27.83787793 |
| chr2 | 59706907 | 59706907 | + | 0          | 0          | -32.96260444 |
| chr2 | 59706971 | 59706971 | - | 0          | 0          | -25.39495798 |
| chr2 | 59706973 | 59706973 | - | 1.11E-16   | 7.26E-15   | -26.47368306 |
| chr2 | 59829351 | 59829351 | + | 0          | 0          | -43.97088715 |
| chr2 | 59829379 | 59829379 | + | 0          | 0          | -42.58598521 |
| chr2 | 59829395 | 59829395 | + | 0          | 0          | -42.79232564 |
| chr2 | 60355220 | 60355220 | + | 3.33E-16   | 2.11E-14   | -37.15135492 |
| chr2 | 60355227 | 60355227 | + | 5.38E-13   | 2.55E-11   | -29.59796635 |
| chr2 | 60355228 | 60355228 | - | 3.15E-13   | 1.53E-11   | -33.49724626 |
| chr2 | 60355252 | 60355252 | - | 4.44E-15   | 2.57E-13   | -33.09617918 |
| chr2 | 60552957 | 60552957 | - | 0          | 0          | -31.42070245 |
| chr2 | 60901521 | 60901521 | + | 0          | 0          | -30.11345189 |
| chr2 | 60901528 | 60901528 | + | 0          | 0          | -33.0474281  |
| chr2 | 60901552 | 60901552 | + | 0          | 0          | -27.06397962 |
| chr2 | 60901556 | 60901556 | + | 0          | 0          | -35.32961604 |
| chr2 | 60901560 | 60901560 | + | 0          | 0          | -33.66880038 |
| chr2 | 60901634 | 60901634 | + | 0          | 0          | -35.71107398 |
| chr2 | 60901635 | 60901635 | - | 0          | 0          | -34.34117321 |
| chr2 | 61456156 | 61456156 | + | 6.85E-06   | 0.00011784 | -29.0521978  |
| chr2 | 61655221 | 61655221 | + | 0          | 0          | -30.49719119 |

|      |          |          |   |            |            |              |
|------|----------|----------|---|------------|------------|--------------|
| chr2 | 61655254 | 61655254 | + | 0          | 0          | -34.75530133 |
| chr2 | 61655255 | 61655255 | - | 0          | 0          | -26.78678754 |
| chr2 | 61655262 | 61655262 | + | 0          | 0          | -31.78456347 |
| chr2 | 61655263 | 61655263 | - | 0          | 0          | -26.16296501 |
| chr2 | 61655299 | 61655299 | + | 0          | 0          | -31.65648537 |
| chr2 | 61655300 | 61655300 | - | 0          | 0          | -28.14699916 |
| chr2 | 61815939 | 61815939 | - | 3.03E-12   | 1.33E-10   | -27.72683491 |
| chr2 | 61815962 | 61815962 | + | 1.24E-12   | 5.65E-11   | -30.13605442 |
| chr2 | 61816000 | 61816000 | + | 1.09E-10   | 4.05E-09   | -27.11291836 |
| chr2 | 61816079 | 61816079 | - | 0          | 0          | -32.00263742 |
| chr2 | 61816081 | 61816081 | - | 0          | 0          | -27.60378436 |
| chr2 | 61816142 | 61816142 | - | 5.55E-15   | 3.18E-13   | -48.05429864 |
| chr2 | 61816201 | 61816201 | + | 0          | 0          | -32.64628125 |
| chr2 | 61816203 | 61816203 | + | 8.33E-15   | 4.69E-13   | -25.33740238 |
| chr2 | 62046839 | 62046839 | - | 2.82E-06   | 5.30E-05   | 38.92022562  |
| chr2 | 64492570 | 64492570 | - | 2.01E-05   | 0.00030854 | 35           |
| chr2 | 65037491 | 65037491 | - | 2.33E-05   | 0.00035131 | -33.22774786 |
| chr2 | 65880817 | 65880817 | + | 3.10E-06   | 5.77E-05   | -27.27272727 |
| chr2 | 65909991 | 65909991 | + | 3.91E-05   | 0.00055587 | -42.63211382 |
| chr2 | 66737047 | 66737047 | + | 0.00042591 | 0.00434731 | -44.87179487 |
| chr2 | 67164384 | 67164384 | - | 0.00023228 | 0.00260348 | 27.16450216  |
| chr2 | 68365433 | 68365433 | + | 4.61E-12   | 1.99E-10   | -44.40194976 |
| chr2 | 68465873 | 68465873 | - | 0          | 0          | -25.85338371 |
| chr2 | 68468790 | 68468790 | + | 0          | 0          | -26.96632663 |
| chr2 | 68468850 | 68468850 | - | 0          | 0          | -35.24494296 |
| chr2 | 68468877 | 68468877 | - | 0          | 0          | -34.32523998 |
| chr2 | 69612709 | 69612709 | + | 0          | 0          | -34.36937718 |
| chr2 | 69612751 | 69612751 | + | 0          | 0          | -36.68788683 |
| chr2 | 69612752 | 69612752 | - | 0          | 0          | -29.79739665 |
| chr2 | 70127922 | 70127922 | - | 2.73E-11   | 1.08E-09   | -25.61481072 |
| chr2 | 70307811 | 70307811 | + | 5.26E-05   | 0.00072079 | -33.33333333 |
| chr2 | 71328925 | 71328925 | + | 1.18E-11   | 4.89E-10   | -35.5734767  |
| chr2 | 71328947 | 71328947 | + | 1.01E-13   | 5.14E-12   | -36.42857143 |
| chr2 | 71328948 | 71328948 | - | 3.48E-12   | 1.52E-10   | -39.62355638 |
| chr2 | 71328956 | 71328956 | - | 3.66E-12   | 1.59E-10   | -39.32125089 |
| chr2 | 71812491 | 71812491 | + | 1.51E-08   | 4.23E-07   | -26.74475754 |
| chr2 | 71816534 | 71816534 | + | 4.45E-05   | 0.00062292 | -37.99168532 |
| chr2 | 71867800 | 71867800 | + | 6.15E-11   | 2.34E-09   | -30.21164021 |
| chr2 | 72056713 | 72056713 | + | 1.11E-16   | 7.26E-15   | -35.86404767 |
| chr2 | 72140538 | 72140538 | + | 0          | 0          | -30.21057868 |
| chr2 | 72398379 | 72398379 | - | 0          | 0          | -42.94016057 |

|      |          |          |   |            |            |              |
|------|----------|----------|---|------------|------------|--------------|
| chr2 | 72398407 | 72398407 | - | 0          | 0          | -40.53339572 |
| chr2 | 72524166 | 72524166 | + | 0          | 0          | -25.13885216 |
| chr2 | 72529734 | 72529734 | + | 9.97E-08   | 2.45E-06   | -29.40165599 |
| chr2 | 72565964 | 72565964 | + | 1.74E-14   | 9.53E-13   | -29.10501572 |
| chr2 | 73037942 | 73037942 | + | 0          | 0          | -33.51976137 |
| chr2 | 73086246 | 73086246 | - | 6.07E-10   | 2.06E-08   | -27.13883677 |
| chr2 | 73263460 | 73263460 | + | 0.00024031 | 0.00268066 | -31.87096774 |
| chr2 | 73278079 | 73278079 | - | 0          | 0          | -31.89811522 |
| chr2 | 73528844 | 73528844 | - | 9.54E-05   | 0.00121123 | -27.49287749 |
| chr2 | 73560975 | 73560975 | + | 0          | 0          | -27.92203969 |
| chr2 | 73560979 | 73560979 | + | 0          | 0          | -37.59767886 |
| chr2 | 73561043 | 73561043 | - | 0          | 0          | -27.83769637 |
| chr2 | 73561063 | 73561063 | + | 0          | 0          | -33.44686523 |
| chr2 | 73561064 | 73561064 | - | 0          | 0          | -27.63416069 |
| chr2 | 73561091 | 73561091 | + | 0          | 0          | -31.10310301 |
| chr2 | 73561092 | 73561092 | - | 0          | 0          | -28.19882485 |
| chr2 | 73561096 | 73561096 | - | 0          | 0          | -25.59051919 |
| chr2 | 73597144 | 73597144 | + | 7.15E-08   | 1.80E-06   | -33.85293344 |
| chr2 | 74691108 | 74691108 | + | 0          | 0          | -30.43258123 |
| chr2 | 74691109 | 74691109 | - | 0          | 0          | -28.08774715 |
| chr2 | 74721254 | 74721254 | + | 0          | 0          | -26.41287455 |
| chr2 | 74725575 | 74725575 | - | 0          | 0          | -25.96942903 |
| chr2 | 74747789 | 74747789 | + | 6.05E-08   | 1.54E-06   | -40.99404117 |
| chr2 | 74930310 | 74930310 | - | 0          | 0          | -25.54095046 |
| chr2 | 75134791 | 75134791 | - | 0          | 0          | -27.06631221 |
| chr2 | 75608742 | 75608742 | - | 0          | 0          | -25.12239385 |
| chr2 | 75608756 | 75608756 | - | 0          | 0          | -27.02998484 |
| chr2 | 75772771 | 75772771 | + | 0          | 0          | -36.12732459 |
| chr2 | 75772793 | 75772793 | + | 0          | 0          | -45.50028098 |
| chr2 | 75772805 | 75772805 | + | 0          | 0          | -45.52589866 |
| chr2 | 75772844 | 75772844 | - | 0          | 0          | -50.27746948 |
| chr2 | 75772849 | 75772849 | - | 0          | 0          | -49.22713304 |
| chr2 | 75772853 | 75772853 | - | 0          | 0          | -42.58672075 |
| chr2 | 75772866 | 75772866 | + | 0          | 0          | -44.33123249 |
| chr2 | 75772867 | 75772867 | - | 0          | 0          | -42.10330121 |
| chr2 | 75772961 | 75772961 | - | 0          | 0          | -37.93699231 |
| chr2 | 75790342 | 75790342 | - | 7.77E-16   | 4.79E-14   | -27.29060479 |
| chr2 | 75790358 | 75790358 | - | 0          | 0          | -26.79294207 |
| chr2 | 75790381 | 75790381 | + | 0          | 0          | -25.05751388 |
| chr2 | 75790382 | 75790382 | - | 0          | 0          | -33.46862483 |
| chr2 | 75790422 | 75790422 | + | 0          | 0          | -25.90655095 |

|      |          |          |   |            |            |              |
|------|----------|----------|---|------------|------------|--------------|
| chr2 | 75802114 | 75802114 | + | 6.86E-13   | 3.22E-11   | -40.33882784 |
| chr2 | 75802140 | 75802140 | + | 2.12E-13   | 1.05E-11   | -32.32600733 |
| chr2 | 75973256 | 75973256 | - | 0.00022891 | 0.0025713  | -25.23727351 |
| chr2 | 77171901 | 77171901 | + | 0          | 0          | -32.6868487  |
| chr2 | 77171998 | 77171998 | - | 0          | 0          | -26.44183966 |
| chr2 | 77262311 | 77262311 | + | 0.00018666 | 0.00216042 | -50.95652174 |
| chr2 | 77506815 | 77506815 | + | 9.01E-11   | 3.37E-09   | -29.2967033  |
| chr2 | 77506833 | 77506833 | + | 4.44E-15   | 2.57E-13   | -41.20448179 |
| chr2 | 77506891 | 77506891 | - | 0          | 0          | -27.58947909 |
| chr2 | 77506903 | 77506903 | - | 0          | 0          | -32.39307831 |
| chr2 | 79589416 | 79589416 | - | 0          | 0          | -26.22096115 |
| chr2 | 80457189 | 80457189 | - | 9.72E-08   | 2.39E-06   | -29.570422   |
| chr2 | 80457193 | 80457193 | - | 8.12E-09   | 2.36E-07   | -32.05893609 |
| chr2 | 81750865 | 81750865 | + | 0.00010513 | 0.00131669 | -42.57861635 |
| chr2 | 83740768 | 83740768 | - | 3.14E-10   | 1.10E-08   | -50.18024513 |
| chr2 | 84073323 | 84073323 | + | 0          | 0          | -26.08339029 |
| chr2 | 84666222 | 84666222 | + | 0          | 0          | -30.71886447 |
| chr2 | 84666421 | 84666421 | - | 6.14E-06   | 0.00010679 | -34.25632911 |
| chr2 | 84741148 | 84741148 | - | 0          | 0          | -31.13695416 |
| chr2 | 84774886 | 84774886 | + | 0          | 0          | -27.34093022 |
| chr2 | 84774909 | 84774909 | + | 0          | 0          | -45.52234763 |
| chr2 | 84774994 | 84774994 | - | 0          | 0          | -38.60780477 |
| chr2 | 84774999 | 84774999 | - | 0          | 0          | -36.05696338 |
| chr2 | 84775007 | 84775007 | - | 0          | 0          | -32.0215311  |
| chr2 | 84790629 | 84790629 | - | 0.00014261 | 0.00171362 | -38.03571429 |
| chr2 | 84875840 | 84875840 | - | 0          | 0          | -31.8131948  |
| chr2 | 84875866 | 84875866 | - | 0          | 0          | -33.99607096 |
| chr2 | 85050407 | 85050407 | + | 5.85E-06   | 0.0001022  | -27.61904762 |
| chr2 | 85050441 | 85050441 | + | 6.24E-06   | 0.0001083  | -25.73591253 |
| chr2 | 85050699 | 85050699 | + | 0          | 0          | -39.07992565 |
| chr2 | 85050831 | 85050831 | - | 0          | 0          | -33.09617703 |
| chr2 | 85050835 | 85050835 | - | 0          | 0          | -29.99635072 |
| chr2 | 85051024 | 85051024 | + | 0          | 0          | -34.30280528 |
| chr2 | 85051025 | 85051025 | - | 8.33E-06   | 0.00014046 | -31.31519274 |
| chr2 | 85051120 | 85051120 | - | 0          | 0          | -34.95193625 |
| chr2 | 85051160 | 85051160 | - | 0          | 0          | -34.48537378 |
| chr2 | 90515328 | 90515328 | + | 1.08E-13   | 5.47E-12   | -26.32675535 |
| chr2 | 90890468 | 90890468 | + | 0          | 0          | -25.94939818 |
| chr2 | 91068830 | 91068830 | - | 0          | 0          | -30.11880332 |
| chr2 | 91086413 | 91086413 | - | 0          | 0          | -27.17609181 |
| chr2 | 91206837 | 91206837 | + | 0          | 0          | -42.30313093 |

|      |           |           |   |            |            |              |
|------|-----------|-----------|---|------------|------------|--------------|
| chr2 | 91457153  | 91457153  | + | 0          | 0          | -30.1508845  |
| chr2 | 91457168  | 91457168  | + | 0          | 0          | -27.24455246 |
| chr2 | 91457334  | 91457334  | + | 0          | 0          | -29.75045208 |
| chr2 | 91457338  | 91457338  | + | 0          | 0          | -40.20434144 |
| chr2 | 91457354  | 91457354  | - | 0          | 0          | -31.89319301 |
| chr2 | 91965955  | 91965955  | - | 1.47E-06   | 2.93E-05   | -26.90421706 |
| chr2 | 92400813  | 92400813  | + | 7.55E-10   | 2.53E-08   | -35.12525535 |
| chr2 | 92400981  | 92400981  | - | 0          | 0          | -32.07357017 |
| chr2 | 92742443  | 92742443  | - | 0          | 0          | -26.33292031 |
| chr2 | 92967477  | 92967477  | + | 0.0008106  | 0.0074305  | -29.16666667 |
| chr2 | 92967708  | 92967708  | + | 0          | 0          | -25.7958513  |
| chr2 | 93014181  | 93014181  | + | 0          | 0          | -32.23506744 |
| chr2 | 93014182  | 93014182  | - | 0          | 0          | -34.1842014  |
| chr2 | 93014190  | 93014190  | + | 1.11E-16   | 7.26E-15   | -28.85662634 |
| chr2 | 93014386  | 93014386  | + | 1.33E-09   | 4.31E-08   | -33.50727388 |
| chr2 | 93112499  | 93112499  | + | 0          | 0          | -25.20084193 |
| chr2 | 93112650  | 93112650  | - | 0          | 0          | -25.9559521  |
| chr2 | 93176784  | 93176784  | - | 0          | 0          | -44.09579772 |
| chr2 | 93637738  | 93637738  | + | 1.56E-07   | 3.71E-06   | -27.80961988 |
| chr2 | 93637896  | 93637896  | - | 0.00013737 | 0.00165875 | -28.54559545 |
| chr2 | 93637902  | 93637902  | - | 0.00058543 | 0.00567565 | -28.04761905 |
| chr2 | 93641740  | 93641740  | + | 0          | 0          | -31.93277311 |
| chr2 | 93641798  | 93641798  | - | 0          | 0          | -28.74335349 |
| chr2 | 93641856  | 93641856  | - | 1.81E-13   | 8.97E-12   | -31.57288859 |
| chr2 | 93643611  | 93643611  | + | 0          | 0          | -36.07805866 |
| chr2 | 93643847  | 93643847  | + | 3.60E-09   | 1.10E-07   | -32.48677249 |
| chr2 | 93643848  | 93643848  | - | 2.70E-10   | 9.53E-09   | -33.42105263 |
| chr2 | 93643879  | 93643879  | + | 0          | 0          | -49.94697773 |
| chr2 | 93644059  | 93644059  | - | 1.22E-06   | 2.48E-05   | -33.1372549  |
| chr2 | 93644068  | 93644068  | - | 7.92E-12   | 3.33E-10   | -44.65761511 |
| chr2 | 93900101  | 93900101  | - | 1.07E-14   | 5.94E-13   | -29.16833049 |
| chr2 | 93900148  | 93900148  | - | 0          | 0          | -31.78977322 |
| chr2 | 98663908  | 98663908  | - | 2.17E-05   | 0.00033021 | -25.18705763 |
| chr2 | 102021798 | 102021798 | - | 0          | 0          | -36.30852257 |
| chr2 | 102104502 | 102104502 | - | 0          | 0          | -30.4423804  |
| chr2 | 102763023 | 102763023 | - | 4.55E-15   | 2.63E-13   | -32.84857467 |
| chr2 | 103476761 | 103476761 | + | 1.09E-11   | 4.51E-10   | -31.37065278 |
| chr2 | 103897075 | 103897075 | - | 0.00062134 | 0.0059632  | -32.6458037  |
| chr2 | 103901156 | 103901156 | + | 4.42E-11   | 1.72E-09   | -35.58441558 |
| chr2 | 103994070 | 103994070 | - | 0          | 0          | -26.47224507 |
| chr2 | 104096461 | 104096461 | - | 1.25E-09   | 4.06E-08   | -25.6281407  |

|      |           |           |   |            |            |              |
|------|-----------|-----------|---|------------|------------|--------------|
| chr2 | 104714728 | 104714728 | - | 3.69E-10   | 1.29E-08   | -29.7668354  |
| chr2 | 105673760 | 105673760 | - | 0          | 0          | -31.8503503  |
| chr2 | 106822865 | 106822865 | - | 0          | 0          | -29.22016291 |
| chr2 | 112244488 | 112244488 | + | 0          | 0          | -30.1232314  |
| chr2 | 114119931 | 114119931 | - | 0.00022201 | 0.00250452 | -38.63863864 |
| chr2 | 114119949 | 114119949 | + | 2.74E-09   | 8.51E-08   | -33.11111111 |
| chr2 | 114119950 | 114119950 | - | 1.95E-06   | 3.79E-05   | -25.62745098 |
| chr2 | 115777575 | 115777575 | - | 0          | 0          | -28.98101816 |
| chr2 | 116061013 | 116061013 | - | 4.17E-10   | 1.44E-08   | -29.72847528 |
| chr2 | 118072956 | 118072956 | + | 3.25E-07   | 7.32E-06   | -37.14978775 |
| chr2 | 118254822 | 118254822 | - | 1.16E-06   | 2.35E-05   | -25.17123288 |
| chr2 | 118262949 | 118262949 | + | 2.22E-16   | 1.43E-14   | -26.68803828 |
| chr2 | 118677753 | 118677753 | - | 5.66E-07   | 1.22E-05   | -26.71568627 |
| chr2 | 118677762 | 118677762 | + | 0          | 0          | -37.49061102 |
| chr2 | 118678078 | 118678078 | + | 0          | 0          | -27.14045694 |
| chr2 | 118702448 | 118702448 | + | 3.66E-15   | 2.14E-13   | -27.1957672  |
| chr2 | 118702460 | 118702460 | + | 0          | 0          | -39.47423517 |
| chr2 | 118702461 | 118702461 | - | 0          | 0          | -31.02086708 |
| chr2 | 118702478 | 118702478 | + | 0          | 0          | -43.96076149 |
| chr2 | 118702479 | 118702479 | - | 0          | 0          | -41.94324194 |
| chr2 | 118702482 | 118702482 | + | 0          | 0          | -51.44591146 |
| chr2 | 118702483 | 118702483 | - | 0          | 0          | -42.17870845 |
| chr2 | 118702506 | 118702506 | + | 0          | 0          | -46.25174806 |
| chr2 | 118702527 | 118702527 | + | 0          | 0          | -40.47809847 |
| chr2 | 118702531 | 118702531 | + | 0          | 0          | -38.99859684 |
| chr2 | 118702598 | 118702598 | - | 0          | 0          | -49.38903646 |
| chr2 | 118711205 | 118711205 | + | 0          | 0          | -34.25783397 |
| chr2 | 118711209 | 118711209 | + | 0          | 0          | -34.14783643 |
| chr2 | 118711218 | 118711218 | + | 0          | 0          | -40.00109618 |
| chr2 | 118711225 | 118711225 | + | 0          | 0          | -43.0803046  |
| chr2 | 118711230 | 118711230 | + | 0          | 0          | -31.70612716 |
| chr2 | 118711233 | 118711233 | + | 0          | 0          | -40.06418638 |
| chr2 | 118711281 | 118711281 | - | 0          | 0          | -26.44292024 |
| chr2 | 118711363 | 118711363 | + | 0          | 0          | -25.89240622 |
| chr2 | 118711399 | 118711399 | - | 0          | 0          | -27.39411368 |
| chr2 | 118762366 | 118762366 | + | 3.00E-07   | 6.81E-06   | -26.75496689 |
| chr2 | 118764276 | 118764276 | + | 0          | 0          | -33.16206198 |
| chr2 | 118764282 | 118764282 | + | 0          | 0          | -37.02689401 |
| chr2 | 118764313 | 118764313 | + | 0          | 0          | -41.8460831  |
| chr2 | 118764364 | 118764364 | + | 4.90E-10   | 1.68E-08   | -27.01269841 |
| chr2 | 118764365 | 118764365 | - | 0          | 0          | -29.12492074 |



|      |           |           |   |            |            |              |
|------|-----------|-----------|---|------------|------------|--------------|
| chr2 | 118903693 | 118903693 | - | 2.88E-07   | 6.54E-06   | -31.01420872 |
| chr2 | 118978246 | 118978246 | + | 1.19E-08   | 3.38E-07   | -27.13339825 |
| chr2 | 118996354 | 118996354 | - | 9.52E-05   | 0.0012084  | -40.86395233 |
| chr2 | 119019061 | 119019061 | + | 3.35E-07   | 7.52E-06   | -33.41750842 |
| chr2 | 119019062 | 119019062 | - | 1.75E-09   | 5.58E-08   | -38.1010101  |
| chr2 | 119019077 | 119019077 | + | 1.47E-09   | 4.74E-08   | -26.81394692 |
| chr2 | 119019084 | 119019084 | - | 9.88E-07   | 2.03E-05   | -29.23351159 |
| chr2 | 119299809 | 119299809 | + | 0          | 0          | -33.26000978 |
| chr2 | 119299827 | 119299827 | + | 0          | 0          | -32.8530699  |
| chr2 | 119299946 | 119299946 | - | 0          | 0          | -29.35097689 |
| chr2 | 119311765 | 119311765 | + | 0          | 0          | -34.57917506 |
| chr2 | 119311817 | 119311817 | - | 0          | 0          | -41.43402399 |
| chr2 | 119322901 | 119322901 | - | 0          | 0          | -26.92422409 |
| chr2 | 119322921 | 119322921 | + | 0          | 0          | -53.27579267 |
| chr2 | 119322923 | 119322923 | + | 0          | 0          | -47.48524802 |
| chr2 | 119322936 | 119322936 | + | 0          | 0          | -50.32522935 |
| chr2 | 119322943 | 119322943 | + | 0          | 0          | -48.68182452 |
| chr2 | 119323035 | 119323035 | - | 0          | 0          | -42.6807564  |
| chr2 | 119323054 | 119323054 | - | 0          | 0          | -43.30472575 |
| chr2 | 119324034 | 119324034 | + | 0          | 0          | -36.61622736 |
| chr2 | 119324043 | 119324043 | + | 0          | 0          | -40.20052487 |
| chr2 | 119324048 | 119324048 | + | 0          | 0          | -43.07472607 |
| chr2 | 119324057 | 119324057 | + | 0          | 0          | -42.54688251 |
| chr2 | 119324064 | 119324064 | + | 0          | 0          | -25.25444195 |
| chr2 | 119324077 | 119324077 | + | 0          | 0          | -38.89578645 |
| chr2 | 119324104 | 119324104 | - | 0          | 0          | -33.12979188 |
| chr2 | 119324136 | 119324136 | + | 0          | 0          | -41.69231687 |
| chr2 | 119324146 | 119324146 | + | 0          | 0          | -26.15125834 |
| chr2 | 119324156 | 119324156 | + | 0          | 0          | -47.68854157 |
| chr2 | 119324164 | 119324164 | + | 0          | 0          | -51.80418996 |
| chr2 | 119324165 | 119324165 | - | 0          | 0          | -44.4496907  |
| chr2 | 119324168 | 119324168 | + | 0          | 0          | -46.83470955 |
| chr2 | 119324169 | 119324169 | - | 0          | 0          | -34.34354663 |
| chr2 | 119324170 | 119324170 | + | 0          | 0          | -34.23070543 |
| chr2 | 119324171 | 119324171 | - | 0          | 0          | -37.42649368 |
| chr2 | 119759810 | 119759810 | - | 0.00054768 | 0.00536906 | -29.35064935 |
| chr2 | 119759859 | 119759859 | - | 3.80E-05   | 0.00054117 | -34.6240942  |
| chr2 | 119855475 | 119855475 | + | 1.50E-09   | 4.83E-08   | -30.91746963 |
| chr2 | 120085108 | 120085108 | - | 0          | 0          | -35.09225486 |
| chr2 | 120085263 | 120085263 | - | 0          | 0          | -28.14368333 |
| chr2 | 120849674 | 120849674 | + | 6.73E-06   | 0.000116   | -25.1085867  |

|      |           |           |   |            |            |              |
|------|-----------|-----------|---|------------|------------|--------------|
| chr2 | 121306586 | 121306586 | + | 0          | 0          | -27.58601198 |
| chr2 | 121306787 | 121306787 | + | 0.00059405 | 0.00574427 | -29.63752665 |
| chr2 | 121442100 | 121442100 | + | 0          | 0          | -26.9535284  |
| chr2 | 121442101 | 121442101 | - | 0          | 0          | -26.40269794 |
| chr2 | 121447522 | 121447522 | + | 0.00042611 | 0.0043489  | -25.61854056 |
| chr2 | 122222533 | 122222533 | + | 1.64E-05   | 0.00025687 | -25.31386861 |
| chr2 | 122233770 | 122233770 | + | 0          | 0          | -26.22467233 |
| chr2 | 122349398 | 122349398 | + | 0          | 0          | -31.40379982 |
| chr2 | 122368038 | 122368038 | + | 6.36E-07   | 1.36E-05   | -25.64152036 |
| chr2 | 125732439 | 125732439 | + | 0          | 0          | -30.0634119  |
| chr2 | 125732458 | 125732458 | + | 0          | 0          | -36.18801016 |
| chr2 | 125732469 | 125732469 | + | 0          | 0          | -31.12479159 |
| chr2 | 125732470 | 125732470 | - | 0          | 0          | -36.4192404  |
| chr2 | 125732492 | 125732492 | - | 0          | 0          | -29.7800602  |
| chr2 | 126527769 | 126527769 | + | 0.00054583 | 0.00535395 | -33.86402754 |
| chr2 | 126553473 | 126553473 | - | 0          | 0          | -26.56689705 |
| chr2 | 126553610 | 126553610 | - | 0          | 0          | -32.6668265  |
| chr2 | 126553692 | 126553692 | + | 0          | 0          | -29.3087625  |
| chr2 | 126553693 | 126553693 | - | 0          | 0          | -31.61571377 |
| chr2 | 126553717 | 126553717 | - | 0          | 0          | -29.5466335  |
| chr2 | 126594335 | 126594335 | + | 0          | 0          | -26.52657058 |
| chr2 | 126594336 | 126594336 | - | 0          | 0          | -36.90278956 |
| chr2 | 126594349 | 126594349 | - | 0          | 0          | -36.22737543 |
| chr2 | 126594382 | 126594382 | + | 4.79E-11   | 1.85E-09   | -26.39050616 |
| chr2 | 126594383 | 126594383 | - | 0          | 0          | -25.37913438 |
| chr2 | 127322993 | 127322993 | + | 0          | 0          | -26.71639726 |
| chr2 | 127323001 | 127323001 | + | 0          | 0          | -33.59574018 |
| chr2 | 127362999 | 127362999 | - | 0.00016611 | 0.00195413 | 28.57142857  |
| chr2 | 127481813 | 127481813 | - | 0          | 0          | -28.71997284 |
| chr2 | 127522091 | 127522091 | + | 0          | 0          | -41.56211353 |
| chr2 | 127522247 | 127522247 | + | 0          | 0          | -29.05013308 |
| chr2 | 127541306 | 127541306 | - | 0          | 0          | -30.77649326 |
| chr2 | 127541313 | 127541313 | + | 0          | 0          | -34.73302849 |
| chr2 | 127541326 | 127541326 | + | 0          | 0          | -28.72297149 |
| chr2 | 127541338 | 127541338 | + | 0          | 0          | -35.69453553 |
| chr2 | 127541415 | 127541415 | - | 0          | 0          | -32.20226252 |
| chr2 | 127541478 | 127541478 | + | 0          | 0          | -26.92955462 |
| chr2 | 127541483 | 127541483 | + | 0          | 0          | -35.09766293 |
| chr2 | 127541484 | 127541484 | - | 0          | 0          | -38.67049009 |
| chr2 | 127541500 | 127541500 | + | 0          | 0          | -34.9306301  |
| chr2 | 127541501 | 127541501 | - | 0          | 0          | -34.45955909 |

|      |           |           |   |            |            |              |
|------|-----------|-----------|---|------------|------------|--------------|
| chr2 | 127541534 | 127541534 | + | 0          | 0          | -33.88329004 |
| chr2 | 127541600 | 127541600 | - | 0          | 0          | -35.74872997 |
| chr2 | 127552852 | 127552852 | + | 0          | 0          | -28.77499492 |
| chr2 | 127552884 | 127552884 | + | 0          | 0          | -28.42138013 |
| chr2 | 127553120 | 127553120 | - | 7.56E-08   | 1.90E-06   | -28.40909091 |
| chr2 | 128212001 | 128212001 | + | 0          | 0          | -26.88617962 |
| chr2 | 128212160 | 128212160 | - | 0          | 0          | -33.32748524 |
| chr2 | 128309871 | 128309871 | - | 0          | 0          | -33.89140738 |
| chr2 | 128309890 | 128309890 | + | 0          | 0          | -28.30065359 |
| chr2 | 129183378 | 129183378 | + | 0          | 0          | -25.72492401 |
| chr2 | 129243852 | 129243852 | + | 0          | 0          | -35.21704758 |
| chr2 | 129243853 | 129243853 | - | 0          | 0          | -35.00052494 |
| chr2 | 129515461 | 129515461 | - | 0          | 0          | -28.65402622 |
| chr2 | 129594181 | 129594181 | + | 1.44E-15   | 8.70E-14   | -36.59751524 |
| chr2 | 130637907 | 130637907 | - | 1.04E-05   | 0.00017101 | -28.37941628 |
| chr2 | 130637909 | 130637909 | + | 3.77E-06   | 6.88E-05   | -27.75994865 |
| chr2 | 130638075 | 130638075 | - | 5.76E-06   | 0.00010082 | -26.88087774 |
| chr2 | 130638083 | 130638083 | - | 7.68E-10   | 2.57E-08   | -44.52724732 |
| chr2 | 130638091 | 130638091 | - | 1.37E-09   | 4.43E-08   | -43.1959345  |
| chr2 | 130638098 | 130638098 | - | 1.51E-05   | 0.00023907 | -32.0056899  |
| chr2 | 130638102 | 130638102 | - | 4.41E-07   | 9.69E-06   | -35.88719154 |
| chr2 | 130838904 | 130838904 | + | 0          | 0          | -26.5951859  |
| chr2 | 131056739 | 131056739 | - | 1.98E-05   | 0.00030432 | -25.05899281 |
| chr2 | 131063743 | 131063743 | - | 0          | 0          | -25.7638979  |
| chr2 | 131171215 | 131171215 | + | 0          | 0          | -25.70339417 |
| chr2 | 131179207 | 131179207 | - | 4.48E-11   | 1.74E-09   | -26.32650562 |
| chr2 | 131892689 | 131892689 | + | 4.15E-09   | 1.26E-07   | -38.4607726  |
| chr2 | 131892718 | 131892718 | + | 5.00E-11   | 1.93E-09   | -45.74870569 |
| chr2 | 132035530 | 132035530 | - | 0          | 0          | -25.29171685 |
| chr2 | 132113883 | 132113883 | + | 7.20E-06   | 0.00012325 | -31.59899749 |
| chr2 | 132144250 | 132144250 | + | 9.14E-08   | 2.26E-06   | -28.47567279 |
| chr2 | 132144264 | 132144264 | + | 2.67E-11   | 1.06E-09   | -25.39813726 |
| chr2 | 132146186 | 132146186 | - | 2.97E-07   | 6.74E-06   | -34.45544554 |
| chr2 | 132427924 | 132427924 | - | 0.00028904 | 0.0031371  | 28.92061432  |
| chr2 | 132880873 | 132880873 | + | 0          | 0          | -28.83241829 |
| chr2 | 132880914 | 132880914 | - | 5.48E-14   | 2.87E-12   | -36.21022418 |
| chr2 | 133553453 | 133553453 | - | 0          | 0          | -28.835531   |
| chr2 | 134856876 | 134856876 | + | 6.69E-13   | 3.14E-11   | -42.41288872 |
| chr2 | 135717250 | 135717250 | + | 0          | 0          | -26.5192484  |
| chr2 | 135717338 | 135717338 | - | 0          | 0          | -28.17320958 |
| chr2 | 135717383 | 135717383 | + | 0          | 0          | -25.34500681 |

|      |           |           |   |            |            |              |
|------|-----------|-----------|---|------------|------------|--------------|
| chr2 | 135717384 | 135717384 | - | 0          | 0          | -25.32423929 |
| chr2 | 135717430 | 135717430 | + | 0          | 0          | -32.3795549  |
| chr2 | 135717493 | 135717493 | - | 0          | 0          | -35.62549218 |
| chr2 | 138278673 | 138278673 | - | 6.14E-11   | 2.34E-09   | -30.62946394 |
| chr2 | 138278813 | 138278813 | - | 0          | 0          | -30.36906596 |
| chr2 | 138279250 | 138279250 | + | 0          | 0          | -29.74571352 |
| chr2 | 138279306 | 138279306 | - | 0          | 0          | -31.93036451 |
| chr2 | 138279860 | 138279860 | + | 0          | 0          | -38.64281329 |
| chr2 | 138279927 | 138279927 | - | 0          | 0          | -31.92582319 |
| chr2 | 138279930 | 138279930 | - | 0          | 0          | -36.85432794 |
| chr2 | 143852033 | 143852033 | + | 0.00085551 | 0.00776876 | -26.78018576 |
| chr2 | 143863033 | 143863033 | + | 0          | 0          | -29.74615778 |
| chr2 | 143863080 | 143863080 | - | 0          | 0          | -27.27018752 |
| chr2 | 145860505 | 145860505 | - | 0          | 0          | -30.39436016 |
| chr2 | 145860524 | 145860524 | - | 0          | 0          | -31.60612207 |
| chr2 | 145860527 | 145860527 | - | 0          | 0          | -36.5354302  |
| chr2 | 145860548 | 145860548 | + | 0          | 0          | -26.6000861  |
| chr2 | 145860555 | 145860555 | + | 0          | 0          | -28.89326672 |
| chr2 | 145860594 | 145860594 | + | 0          | 0          | -29.63179906 |
| chr2 | 145860595 | 145860595 | - | 0          | 0          | -27.03821583 |
| chr2 | 145860609 | 145860609 | - | 0          | 0          | -29.71754386 |
| chr2 | 145860619 | 145860619 | - | 0          | 0          | -27.5885987  |
| chr2 | 145860624 | 145860624 | + | 9.80E-06   | 0.00016256 | -26.33053221 |
| chr2 | 145860642 | 145860642 | - | 2.61E-09   | 8.14E-08   | -35.56255909 |
| chr2 | 145860645 | 145860645 | - | 2.14E-05   | 0.00032644 | -26.23969562 |
| chr2 | 145860648 | 145860648 | - | 2.18E-07   | 5.06E-06   | -31.86127745 |
| chr2 | 145860651 | 145860651 | + | 0          | 0          | -30.06995644 |
| chr2 | 145860652 | 145860652 | - | 2.47E-06   | 4.69E-05   | -29.22305764 |
| chr2 | 145860674 | 145860674 | + | 0          | 0          | -30.79559137 |
| chr2 | 145860703 | 145860703 | - | 0          | 0          | -30.38033042 |
| chr2 | 145860730 | 145860730 | - | 0          | 0          | -28.0679412  |
| chr2 | 145860735 | 145860735 | - | 0          | 0          | -32.88802893 |
| chr2 | 145860745 | 145860745 | - | 0          | 0          | -31.83037819 |
| chr2 | 145860748 | 145860748 | + | 1.42E-09   | 4.59E-08   | -28.33852475 |
| chr2 | 145860749 | 145860749 | - | 0          | 0          | -29.60902256 |
| chr2 | 146291236 | 146291236 | - | 0          | 0          | -39.5387352  |
| chr2 | 146291253 | 146291253 | - | 0          | 0          | -39.9811219  |
| chr2 | 146302418 | 146302418 | + | 0          | 0          | -38.48016868 |
| chr2 | 146302554 | 146302554 | - | 0          | 0          | -38.50675782 |
| chr2 | 146302570 | 146302570 | - | 0          | 0          | -25.25247197 |
| chr2 | 146959255 | 146959255 | - | 0          | 0          | -37.49698355 |

|      |           |           |   |            |            |              |
|------|-----------|-----------|---|------------|------------|--------------|
| chr2 | 147189394 | 147189394 | + | 1.05E-10   | 3.90E-09   | -33.30071116 |
| chr2 | 147189411 | 147189411 | + | 1.72E-10   | 6.23E-09   | -40.29061203 |
| chr2 | 147189434 | 147189434 | + | 5.39E-08   | 1.38E-06   | -31.26420455 |
| chr2 | 147189681 | 147189681 | + | 0          | 0          | -26.5227727  |
| chr2 | 148038569 | 148038569 | - | 0.00072022 | 0.00673794 | -37.5        |
| chr2 | 148043904 | 148043904 | + | 0          | 0          | -35.01759486 |
| chr2 | 148043930 | 148043930 | + | 0          | 0          | -25.02102162 |
| chr2 | 148395253 | 148395253 | - | 8.65E-07   | 1.80E-05   | -31.06360043 |
| chr2 | 148396178 | 148396178 | + | 1.90E-08   | 5.23E-07   | -35.318439   |
| chr2 | 148678074 | 148678074 | + | 0.00010704 | 0.0013371  | -26.26262626 |
| chr2 | 148679455 | 148679455 | - | 0.00044019 | 0.00446892 | -28.13395021 |
| chr2 | 148679472 | 148679472 | + | 0          | 0          | -33.48526493 |
| chr2 | 148679473 | 148679473 | - | 3.72E-05   | 0.00053104 | -35.66041801 |
| chr2 | 148679513 | 148679513 | - | 0          | 0          | -28.41550306 |
| chr2 | 151893682 | 151893682 | - | 0          | 0          | -25.39853499 |
| chr2 | 151964380 | 151964380 | - | 0          | 0          | -28.66310556 |
| chr2 | 151964622 | 151964622 | - | 0          | 0          | -28.25089606 |
| chr2 | 151964641 | 151964641 | - | 0          | 0          | -29.89374728 |
| chr2 | 151967395 | 151967395 | - | 3.82E-10   | 1.33E-08   | -25.03538928 |
| chr2 | 151970537 | 151970537 | - | 0.00016173 | 0.00190996 | -30.54968288 |
| chr2 | 151970554 | 151970554 | - | 5.29E-06   | 9.34E-05   | -36.16680032 |
| chr2 | 151970603 | 151970603 | - | 0          | 0          | -25.38451037 |
| chr2 | 151970605 | 151970605 | - | 0          | 0          | -27.82019469 |
| chr2 | 151970640 | 151970640 | - | 0          | 0          | -32.45030267 |
| chr2 | 151970652 | 151970652 | - | 0          | 0          | -29.04900332 |
| chr2 | 151970661 | 151970661 | + | 0          | 0          | -31.67393752 |
| chr2 | 151970793 | 151970793 | + | 0          | 0          | -27.55667756 |
| chr2 | 151970794 | 151970794 | - | 0          | 0          | -29.5566392  |
| chr2 | 151996847 | 151996847 | + | 2.22E-16   | 1.43E-14   | -27.42067136 |
| chr2 | 151999850 | 151999850 | + | 1.91E-13   | 9.46E-12   | -44.12504492 |
| chr2 | 151999873 | 151999873 | + | 3.88E-13   | 1.86E-11   | -45.45454545 |
| chr2 | 151999890 | 151999890 | + | 1.04E-14   | 5.82E-13   | -52.14460784 |
| chr2 | 152000081 | 152000081 | + | 0          | 0          | -29.06388642 |
| chr2 | 152000084 | 152000084 | + | 0          | 0          | -27.48628233 |
| chr2 | 152114698 | 152114698 | - | 0          | 0          | -28.58269269 |
| chr2 | 152114744 | 152114744 | - | 1.27E-13   | 6.39E-12   | -25.9139618  |
| chr2 | 152114876 | 152114876 | - | 0          | 0          | -32.60056822 |
| chr2 | 152114914 | 152114914 | - | 8.87E-11   | 3.32E-09   | -26.75189394 |
| chr2 | 152177678 | 152177678 | - | 0.00016178 | 0.00191044 | -25.84142956 |
| chr2 | 152376517 | 152376517 | + | 0          | 0          | -38.72915671 |
| chr2 | 152376518 | 152376518 | - | 0          | 0          | -33.49576016 |

|      |           |           |   |          |          |              |
|------|-----------|-----------|---|----------|----------|--------------|
| chr2 | 152376559 | 152376559 | + | 0        | 0        | -35.61474784 |
| chr2 | 152376560 | 152376560 | - | 0        | 0        | -37.5869346  |
| chr2 | 152376584 | 152376584 | + | 0        | 0        | -43.3797099  |
| chr2 | 152376611 | 152376611 | - | 0        | 0        | -35.18452324 |
| chr2 | 152376622 | 152376622 | - | 0        | 0        | -30.84948167 |
| chr2 | 152376624 | 152376624 | - | 0        | 0        | -33.16046309 |
| chr2 | 152376630 | 152376630 | - | 0        | 0        | -37.38631851 |
| chr2 | 152376644 | 152376644 | + | 0        | 0        | -44.46770809 |
| chr2 | 152395612 | 152395612 | - | 4.76E-08 | 1.23E-06 | -31.58462091 |
| chr2 | 152412733 | 152412733 | - | 0        | 0        | -26.0376656  |
| chr2 | 152413687 | 152413687 | + | 0        | 0        | -26.03832603 |
| chr2 | 152413718 | 152413718 | + | 0        | 0        | -33.63462208 |
| chr2 | 152413719 | 152413719 | - | 0        | 0        | -60.8829948  |
| chr2 | 152413741 | 152413741 | - | 0        | 0        | -46.64737613 |
| chr2 | 152413752 | 152413752 | - | 0        | 0        | -52.73001343 |
| chr2 | 152413765 | 152413765 | + | 0        | 0        | -44.55601522 |
| chr2 | 152413766 | 152413766 | - | 0        | 0        | -46.40939811 |
| chr2 | 152413785 | 152413785 | + | 0        | 0        | -46.62853423 |
| chr2 | 152413862 | 152413862 | + | 0        | 0        | -55.44763748 |
| chr2 | 152413863 | 152413863 | - | 0        | 0        | -45.39826639 |
| chr2 | 152413876 | 152413876 | + | 0        | 0        | -46.62728629 |
| chr2 | 152413877 | 152413877 | - | 0        | 0        | -56.58543703 |
| chr2 | 152413889 | 152413889 | + | 0        | 0        | -53.58908279 |
| chr2 | 152413890 | 152413890 | - | 0        | 0        | -51.48853131 |
| chr2 | 152413905 | 152413905 | - | 0        | 0        | -32.17167629 |
| chr2 | 152628261 | 152628261 | - | 2.17E-13 | 1.07E-11 | -26.9298417  |
| chr2 | 152628309 | 152628309 | - | 0        | 0        | -25.6324715  |
| chr2 | 152696244 | 152696244 | + | 8.81E-12 | 3.69E-10 | -26.12086116 |
| chr2 | 152707613 | 152707613 | - | 0        | 0        | -33.41702426 |
| chr2 | 152707615 | 152707615 | - | 0        | 0        | -37.97067449 |
| chr2 | 152707623 | 152707623 | + | 0        | 0        | -43.48897474 |
| chr2 | 152707624 | 152707624 | - | 0        | 0        | -43.33599305 |
| chr2 | 152707629 | 152707629 | + | 0        | 0        | -41.75994356 |
| chr2 | 152707638 | 152707638 | + | 0        | 0        | -28.4473953  |
| chr2 | 152707648 | 152707648 | + | 0        | 0        | -36.23338073 |
| chr2 | 152707655 | 152707655 | + | 0        | 0        | -33.08206503 |
| chr2 | 152707701 | 152707701 | - | 0        | 0        | -40.343583   |
| chr2 | 152707707 | 152707707 | - | 0        | 0        | -30.8564165  |
| chr2 | 152707729 | 152707729 | - | 0        | 0        | -39.40803452 |
| chr2 | 152707735 | 152707735 | - | 0        | 0        | -45.42932005 |
| chr2 | 152707741 | 152707741 | - | 0        | 0        | -31.58454791 |

|      |           |           |   |            |            |              |
|------|-----------|-----------|---|------------|------------|--------------|
| chr2 | 152707743 | 152707743 | + | 0          | 0          | -42.57588335 |
| chr2 | 152707744 | 152707744 | - | 0          | 0          | -42.14354757 |
| chr2 | 152707751 | 152707751 | + | 0          | 0          | -34.27559913 |
| chr2 | 152707764 | 152707764 | + | 0          | 0          | -40.58052189 |
| chr2 | 152707775 | 152707775 | + | 0          | 0          | -39.16009361 |
| chr2 | 152707786 | 152707786 | + | 0          | 0          | -35.40141202 |
| chr2 | 152707787 | 152707787 | - | 0          | 0          | -35.98370634 |
| chr2 | 152707793 | 152707793 | + | 0          | 0          | -44.54941513 |
| chr2 | 152707794 | 152707794 | - | 0          | 0          | -42.87571411 |
| chr2 | 152707801 | 152707801 | - | 0          | 0          | -29.72522818 |
| chr2 | 152707817 | 152707817 | - | 0          | 0          | -37.60265047 |
| chr2 | 152707821 | 152707821 | - | 0          | 0          | -37.56084992 |
| chr2 | 152707823 | 152707823 | - | 0          | 0          | -36.46879338 |
| chr2 | 152707831 | 152707831 | - | 0          | 0          | -33.21920443 |
| chr2 | 152707833 | 152707833 | - | 0          | 0          | -35.69439021 |
| chr2 | 152707836 | 152707836 | + | 1.48E-06   | 2.94E-05   | -32.49893025 |
| chr2 | 152707837 | 152707837 | - | 0          | 0          | -33.32985707 |
| chr2 | 152707857 | 152707857 | + | 1.35E-06   | 2.70E-05   | -42.22222222 |
| chr2 | 152707864 | 152707864 | + | 1.78E-09   | 5.67E-08   | -50.52563828 |
| chr2 | 152738225 | 152738225 | + | 0          | 0          | -26.58578471 |
| chr2 | 152740538 | 152740538 | - | 0          | 0          | -34.29609204 |
| chr2 | 152928533 | 152928533 | - | 0          | 0          | -26.75427667 |
| chr2 | 153268575 | 153268575 | + | 0          | 0          | -27.46649009 |
| chr2 | 153308894 | 153308894 | + | 0          | 0          | -35.02366752 |
| chr2 | 153308928 | 153308928 | + | 0          | 0          | -28.98661838 |
| chr2 | 153437218 | 153437218 | + | 0          | 0          | -29.85088985 |
| chr2 | 153437415 | 153437415 | - | 0          | 0          | -39.15134371 |
| chr2 | 153492105 | 153492105 | - | 0          | 0          | -28.6724671  |
| chr2 | 154427996 | 154427996 | - | 0          | 0          | -29.32574266 |
| chr2 | 154427999 | 154427999 | - | 0          | 0          | -27.28320632 |
| chr2 | 154428298 | 154428298 | - | 0          | 0          | -27.09013307 |
| chr2 | 154552045 | 154552045 | + | 0          | 0          | -25.15023653 |
| chr2 | 154552138 | 154552138 | - | 0          | 0          | -25.4976613  |
| chr2 | 154568192 | 154568192 | + | 8.42E-05   | 0.00108577 | -27.97328811 |
| chr2 | 154568221 | 154568221 | + | 1.92E-12   | 8.60E-11   | -46.08841752 |
| chr2 | 155047887 | 155047887 | + | 0.00023481 | 0.00262803 | -33.29493088 |
| chr2 | 155386600 | 155386600 | + | 0          | 0          | -32.49476751 |
| chr2 | 156408435 | 156408435 | + | 0.00059667 | 0.00576548 | -25.97803706 |
| chr2 | 156420632 | 156420632 | - | 0          | 0          | -27.02373174 |
| chr2 | 156420659 | 156420659 | + | 9.63E-07   | 1.99E-05   | -30.02754821 |
| chr2 | 156440153 | 156440153 | + | 5.77E-15   | 3.30E-13   | -28.48437209 |

|      |           |           |   |            |            |              |
|------|-----------|-----------|---|------------|------------|--------------|
| chr2 | 156440378 | 156440378 | - | 6.18E-06   | 0.00010738 | -31.19025305 |
| chr2 | 156704441 | 156704441 | + | 0          | 0          | -25.84802221 |
| chr2 | 156765081 | 156765081 | + | 0          | 0          | -26.42958661 |
| chr2 | 156774914 | 156774914 | + | 0          | 0          | -33.0244716  |
| chr2 | 156774915 | 156774915 | - | 9.77E-14   | 4.98E-12   | -27.70417647 |
| chr2 | 156775045 | 156775045 | - | 1.65E-06   | 3.25E-05   | -37.91715579 |
| chr2 | 156775093 | 156775093 | + | 7.18E-14   | 3.71E-12   | -36.49702722 |
| chr2 | 156775094 | 156775094 | - | 1.28E-10   | 4.71E-09   | -34.90503716 |
| chr2 | 156842466 | 156842466 | + | 0          | 0          | -43.6570451  |
| chr2 | 156842495 | 156842495 | + | 0          | 0          | -35.92129274 |
| chr2 | 156842513 | 156842513 | + | 0          | 0          | -45.25318639 |
| chr2 | 156842527 | 156842527 | - | 0          | 0          | -56.18446503 |
| chr2 | 156842536 | 156842536 | - | 0          | 0          | -59.07218279 |
| chr2 | 156842566 | 156842566 | - | 0          | 0          | -63.40463686 |
| chr2 | 156842572 | 156842572 | - | 0          | 0          | -62.09753375 |
| chr2 | 156842859 | 156842859 | + | 0          | 0          | -39.63508557 |
| chr2 | 157052198 | 157052198 | - | 1.44E-07   | 3.45E-06   | -28.05924695 |
| chr2 | 157059050 | 157059050 | + | 0          | 0          | -49.44729689 |
| chr2 | 157059082 | 157059082 | + | 0          | 0          | -32.60774836 |
| chr2 | 157059393 | 157059393 | - | 0          | 0          | -29.34520269 |
| chr2 | 157079866 | 157079866 | - | 3.39E-06   | 6.25E-05   | -31.32411067 |
| chr2 | 157079909 | 157079909 | - | 4.42E-05   | 0.00061956 | -27.60600344 |
| chr2 | 157079988 | 157079988 | - | 0          | 0          | -35.43977283 |
| chr2 | 157082265 | 157082265 | + | 0          | 0          | -29.48015789 |
| chr2 | 157082282 | 157082282 | + | 0          | 0          | -27.72181842 |
| chr2 | 157349387 | 157349387 | - | 4.55E-05   | 0.00063512 | -37.50618506 |
| chr2 | 157418313 | 157418313 | - | 1.22E-14   | 6.77E-13   | -31.95248718 |
| chr2 | 157418328 | 157418328 | - | 6.00E-12   | 2.55E-10   | -27.69361174 |
| chr2 | 157429649 | 157429649 | + | 1.92E-05   | 0.00029591 | -27.69892473 |
| chr2 | 157464834 | 157464834 | + | 3.25E-05   | 0.00047165 | -36.99324324 |
| chr2 | 157488115 | 157488115 | - | 7.94E-10   | 2.65E-08   | -29.76100629 |
| chr2 | 157490684 | 157490684 | - | 0          | 0          | -29.27682419 |
| chr2 | 157559574 | 157559574 | + | 0          | 0          | -29.48935647 |
| chr2 | 157559584 | 157559584 | + | 1.44E-15   | 8.70E-14   | -28.26546316 |
| chr2 | 157559590 | 157559590 | + | 2.64E-13   | 1.29E-11   | -25.87951451 |
| chr2 | 157559602 | 157559602 | + | 1.11E-16   | 7.26E-15   | -28.82871226 |
| chr2 | 157640746 | 157640746 | - | 0.00026285 | 0.00289449 | -26.58008658 |
| chr2 | 157705797 | 157705797 | + | 3.35E-11   | 1.32E-09   | -26.39580603 |
| chr2 | 157838323 | 157838323 | + | 0          | 0          | -27.8542356  |
| chr2 | 157838476 | 157838476 | - | 1.72E-11   | 6.98E-10   | -27.18513143 |
| chr2 | 158258868 | 158258868 | - | 0          | 0          | -29.73524586 |



|      |           |           |   |            |            |              |
|------|-----------|-----------|---|------------|------------|--------------|
| chr2 | 158282305 | 158282305 | - | 0          | 0          | -25.55073783 |
| chr2 | 158375940 | 158375940 | - | 0          | 0          | -27.83130526 |
| chr2 | 158397402 | 158397402 | - | 4.71E-05   | 0.00065485 | -29.28229665 |
| chr2 | 158539882 | 158539882 | + | 0          | 0          | -27.71340402 |
| chr2 | 158539893 | 158539893 | + | 5.55E-16   | 3.46E-14   | -26.31911052 |
| chr2 | 158539900 | 158539900 | - | 4.44E-16   | 2.79E-14   | -26.48172419 |
| chr2 | 158554601 | 158554601 | + | 0          | 0          | -26.59206553 |
| chr2 | 158666087 | 158666087 | - | 1.11E-16   | 7.26E-15   | -25.70617865 |
| chr2 | 158687830 | 158687830 | + | 0          | 0          | -31.12686862 |
| chr2 | 158775039 | 158775039 | + | 6.66E-16   | 4.13E-14   | -25.38714527 |
| chr2 | 158775251 | 158775251 | - | 5.97E-06   | 0.0001042  | -25.87716535 |
| chr2 | 158775265 | 158775265 | - | 6.08E-06   | 0.00010593 | -27.55905512 |
| chr2 | 160214855 | 160214855 | - | 5.29E-05   | 0.00072458 | 35.29411765  |
| chr2 | 160741022 | 160741022 | + | 6.49E-06   | 0.00011223 | -27.49128501 |
| chr2 | 160741029 | 160741029 | + | 3.37E-10   | 1.18E-08   | -33.08716707 |
| chr2 | 160741192 | 160741192 | - | 2.39E-06   | 4.57E-05   | -29.97462849 |
| chr2 | 160741206 | 160741206 | + | 8.33E-15   | 4.69E-13   | -26.20028431 |
| chr2 | 160741207 | 160741207 | - | 1.29E-14   | 7.13E-13   | -29.00210248 |
| chr2 | 162942729 | 162942729 | - | 9.10E-15   | 5.11E-13   | -34.13771583 |
| chr2 | 163278150 | 163278150 | + | 0          | 0          | -25.88886273 |
| chr2 | 163397897 | 163397897 | - | 1.04E-05   | 0.00017076 | 27.6900149   |
| chr2 | 163731939 | 163731939 | - | 0          | 0          | -28.95899236 |
| chr2 | 164006943 | 164006943 | + | 0          | 0          | -25.27611709 |
| chr2 | 164123445 | 164123445 | + | 2.39E-14   | 1.29E-12   | -30.97363083 |
| chr2 | 164170497 | 164170497 | + | 1.09E-05   | 0.00017888 | -32.47401247 |
| chr2 | 164170503 | 164170503 | + | 5.35E-07   | 1.16E-05   | -34.12698413 |
| chr2 | 164170526 | 164170526 | + | 6.88E-08   | 1.74E-06   | -34.07494145 |
| chr2 | 164171874 | 164171874 | + | 1.11E-16   | 7.26E-15   | -37.4728886  |
| chr2 | 164171880 | 164171880 | + | 3.33E-16   | 2.11E-14   | -32.53039763 |
| chr2 | 164171902 | 164171902 | + | 7.72E-09   | 2.25E-07   | -25.02660282 |
| chr2 | 164172124 | 164172124 | - | 0.00051927 | 0.00513429 | -25.10885341 |
| chr2 | 164403882 | 164403882 | - | 0.00076397 | 0.00707628 | -32.08375549 |
| chr2 | 164430756 | 164430756 | + | 0.00071217 | 0.00667573 | -26.79104478 |
| chr2 | 164432878 | 164432878 | - | 4.77E-11   | 1.84E-09   | -34.25699621 |
| chr2 | 164432883 | 164432883 | + | 0          | 0          | -30.68050233 |
| chr2 | 164432884 | 164432884 | - | 6.22E-15   | 3.55E-13   | -36.60179641 |
| chr2 | 164432889 | 164432889 | + | 0          | 0          | -40.24945749 |
| chr2 | 164432928 | 164432928 | + | 0          | 0          | -43.17373338 |
| chr2 | 164432990 | 164432990 | - | 0          | 0          | -42.29437809 |
| chr2 | 164433014 | 164433014 | - | 0          | 0          | -43.66904198 |
| chr2 | 164433017 | 164433017 | + | 1.09E-07   | 2.66E-06   | -25.41166215 |

|      |           |           |   |           |            |              |
|------|-----------|-----------|---|-----------|------------|--------------|
| chr2 | 164433018 | 164433018 | - | 0         | 0          | -38.5450645  |
| chr2 | 164562840 | 164562840 | + | 0         | 0          | -27.66273167 |
| chr2 | 164562930 | 164562930 | + | 0         | 0          | -43.70073282 |
| chr2 | 164562931 | 164562931 | - | 0         | 0          | -44.98654718 |
| chr2 | 164563044 | 164563044 | + | 3.03E-07  | 6.87E-06   | -31.66666667 |
| chr2 | 164563045 | 164563045 | - | 1.11E-16  | 7.26E-15   | -35.84037254 |
| chr2 | 164563052 | 164563052 | + | 1.64E-07  | 3.88E-06   | -35.38533835 |
| chr2 | 164563356 | 164563356 | + | 0         | 0          | -38.32794278 |
| chr2 | 164563420 | 164563420 | - | 0         | 0          | -42.29957489 |
| chr2 | 164678937 | 164678937 | - | 1.32E-09  | 4.28E-08   | -25.4909511  |
| chr2 | 165107102 | 165107102 | - | 1.11E-16  | 7.26E-15   | -28.41181165 |
| chr2 | 165136574 | 165136574 | + | 0         | 0          | -30.3281165  |
| chr2 | 165136575 | 165136575 | - | 0         | 0          | -31.02330575 |
| chr2 | 165139892 | 165139892 | + | 0         | 0          | -28.85859263 |
| chr2 | 165140044 | 165140044 | - | 0         | 0          | -33.04369852 |
| chr2 | 165142084 | 165142084 | + | 0         | 0          | -28.31670031 |
| chr2 | 165142120 | 165142120 | - | 0         | 0          | -28.39981064 |
| chr2 | 165142122 | 165142122 | - | 0         | 0          | -30.50614784 |
| chr2 | 165142146 | 165142146 | - | 0         | 0          | -29.81798448 |
| chr2 | 165181118 | 165181118 | - | 1.80E-09  | 5.74E-08   | -25.49702808 |
| chr2 | 165235943 | 165235943 | - | 0         | 0          | -31.82043651 |
| chr2 | 165246222 | 165246222 | + | 4.89E-13  | 2.33E-11   | -42.50413565 |
| chr2 | 165246370 | 165246370 | - | 4.08E-08  | 1.07E-06   | -34.31646631 |
| chr2 | 165246397 | 165246397 | + | 0.0001017 | 0.00127965 | -51.85185185 |
| chr2 | 165246398 | 165246398 | - | 4.30E-14  | 2.27E-12   | -55.18477661 |
| chr2 | 165254029 | 165254029 | + | 0         | 0          | -55.52643891 |
| chr2 | 165254060 | 165254060 | + | 0         | 0          | -45.75915513 |
| chr2 | 165254061 | 165254061 | - | 0         | 0          | -49.72077088 |
| chr2 | 165254074 | 165254074 | - | 0         | 0          | -52.59920725 |
| chr2 | 165254402 | 165254402 | + | 1.11E-16  | 7.26E-15   | -42.46287129 |
| chr2 | 165258446 | 165258446 | - | 1.99E-06  | 3.85E-05   | -32.29555832 |
| chr2 | 165262286 | 165262286 | - | 9.23E-13  | 4.27E-11   | -30.74074074 |
| chr2 | 165267088 | 165267088 | + | 0         | 0          | -32.67199387 |
| chr2 | 165563079 | 165563079 | - | 4.43E-05  | 0.00062077 | -28.76344086 |
| chr2 | 165622700 | 165622700 | - | 5.66E-08  | 1.45E-06   | -31.30399839 |
| chr2 | 165647377 | 165647377 | + | 0         | 0          | -33.23383766 |
| chr2 | 165647515 | 165647515 | - | 1.35E-06  | 2.70E-05   | -28.85154062 |
| chr2 | 165708498 | 165708498 | - | 0         | 0          | -27.16617396 |
| chr2 | 165780441 | 165780441 | + | 5.86E-07  | 1.26E-05   | -34.70930233 |
| chr2 | 165792832 | 165792832 | - | 0         | 0          | -30.14909415 |
| chr2 | 165858149 | 165858149 | + | 0         | 0          | -41.31626812 |

|      |           |           |   |            |            |              |
|------|-----------|-----------|---|------------|------------|--------------|
| chr2 | 165858152 | 165858152 | + | 0          | 0          | -49.16430492 |
| chr2 | 165858160 | 165858160 | + | 0          | 0          | -30.50729919 |
| chr2 | 165858163 | 165858163 | + | 0          | 0          | -49.58362077 |
| chr2 | 165858190 | 165858190 | + | 0          | 0          | -38.76229539 |
| chr2 | 165858256 | 165858256 | + | 0          | 0          | -30.9641203  |
| chr2 | 165858257 | 165858257 | - | 0          | 0          | -39.53315969 |
| chr2 | 165858297 | 165858297 | - | 0          | 0          | -44.66363809 |
| chr2 | 165859197 | 165859197 | - | 3.93E-08   | 1.03E-06   | -33.96789847 |
| chr2 | 165875507 | 165875507 | + | 0          | 0          | -30.70728451 |
| chr2 | 165875539 | 165875539 | + | 0          | 0          | -33.59696565 |
| chr2 | 165875601 | 165875601 | - | 0          | 0          | -27.10405124 |
| chr2 | 165880645 | 165880645 | + | 4.93E-11   | 1.90E-09   | -37.02109705 |
| chr2 | 165880655 | 165880655 | + | 7.14E-09   | 2.09E-07   | -31.79183623 |
| chr2 | 165880904 | 165880904 | - | 0          | 0          | -54.64011692 |
| chr2 | 165900462 | 165900462 | + | 0          | 0          | -35.67539023 |
| chr2 | 165900492 | 165900492 | + | 0          | 0          | -38.94133448 |
| chr2 | 165900493 | 165900493 | - | 0          | 0          | -45.32941102 |
| chr2 | 165900510 | 165900510 | + | 0          | 0          | -27.19951059 |
| chr2 | 165900511 | 165900511 | - | 0          | 0          | -38.81064536 |
| chr2 | 165900537 | 165900537 | + | 0          | 0          | -49.64676735 |
| chr2 | 165900538 | 165900538 | - | 0          | 0          | -48.18500239 |
| chr2 | 165900543 | 165900543 | + | 0          | 0          | -38.54930725 |
| chr2 | 165900544 | 165900544 | - | 0          | 0          | -37.72373221 |
| chr2 | 165900562 | 165900562 | + | 0          | 0          | -46.37550865 |
| chr2 | 165900563 | 165900563 | - | 0          | 0          | -42.53256515 |
| chr2 | 165900590 | 165900590 | + | 0          | 0          | -52.32258816 |
| chr2 | 165900591 | 165900591 | - | 0          | 0          | -53.0450835  |
| chr2 | 165900602 | 165900602 | + | 0          | 0          | -44.47977112 |
| chr2 | 165900603 | 165900603 | - | 0          | 0          | -47.06885807 |
| chr2 | 165900620 | 165900620 | - | 0          | 0          | -38.38626378 |
| chr2 | 165901077 | 165901077 | + | 0          | 0          | -37.81413679 |
| chr2 | 165901105 | 165901105 | + | 0          | 0          | -49.52800783 |
| chr2 | 165901189 | 165901189 | - | 0          | 0          | -27.18389495 |
| chr2 | 166111932 | 166111932 | + | 0.0001335  | 0.00161874 | 34.7826087   |
| chr2 | 166156222 | 166156222 | - | 1.31E-05   | 0.0002113  | -25.14400922 |
| chr2 | 166204360 | 166204360 | - | 0          | 0          | -35.23992384 |
| chr2 | 166204366 | 166204366 | - | 0          | 0          | -28.47462003 |
| chr2 | 166204371 | 166204371 | - | 0          | 0          | -26.95059882 |
| chr2 | 166295584 | 166295584 | + | 2.48E-07   | 5.71E-06   | -34.32835821 |
| chr2 | 166355528 | 166355528 | + | 0.00039697 | 0.00409845 | -37.03703704 |
| chr2 | 166384274 | 166384274 | + | 1.48E-06   | 2.95E-05   | -39.47368421 |

|      |           |           |   |            |            |              |
|------|-----------|-----------|---|------------|------------|--------------|
| chr2 | 166406124 | 166406124 | - | 0          | 0          | -26.30385488 |
| chr2 | 166489102 | 166489102 | + | 0          | 0          | -26.76678078 |
| chr2 | 166610319 | 166610319 | - | 0          | 0          | -26.47502115 |
| chr2 | 166622608 | 166622608 | - | 0          | 0          | -27.94614919 |
| chr2 | 166630064 | 166630064 | + | 3.85E-05   | 0.00054819 | -25.22572324 |
| chr2 | 166630087 | 166630087 | + | 0.00011896 | 0.00146467 | -26.74818841 |
| chr2 | 166631775 | 166631775 | + | 0          | 0          | -30.10469468 |
| chr2 | 166631842 | 166631842 | - | 0          | 0          | -31.66348592 |
| chr2 | 166631852 | 166631852 | - | 0          | 0          | -29.98547868 |
| chr2 | 166632333 | 166632333 | - | 0          | 0          | -49.18575406 |
| chr2 | 166632349 | 166632349 | - | 0          | 0          | -34.21116715 |
| chr2 | 166632381 | 166632381 | - | 0          | 0          | -44.97251475 |
| chr2 | 166647013 | 166647013 | - | 1.11E-16   | 7.26E-15   | -29.07534699 |
| chr2 | 166647027 | 166647027 | - | 0          | 0          | -34.7731616  |
| chr2 | 166657565 | 166657565 | + | 2.55E-15   | 1.51E-13   | -26.37761669 |
| chr2 | 166657566 | 166657566 | - | 0          | 0          | -28.2480145  |
| chr2 | 166666196 | 166666196 | - | 1.18E-06   | 2.40E-05   | -32.07498716 |
| chr2 | 167074475 | 167074475 | + | 0          | 0          | -36.42706382 |
| chr2 | 167188353 | 167188353 | + | 0          | 0          | -29.9068966  |
| chr2 | 167188430 | 167188430 | - | 0          | 0          | -25.00426403 |
| chr2 | 167188472 | 167188472 | + | 0          | 0          | -31.26474088 |
| chr2 | 167188484 | 167188484 | + | 0          | 0          | -36.1670042  |
| chr2 | 167188485 | 167188485 | - | 0          | 0          | -31.34172818 |
| chr2 | 167188502 | 167188502 | - | 0          | 0          | -32.27688021 |
| chr2 | 167188540 | 167188540 | + | 0          | 0          | -26.22494402 |
| chr2 | 167188550 | 167188550 | + | 0          | 0          | -27.46435415 |
| chr2 | 167538554 | 167538554 | + | 0          | 0          | -36.18871944 |
| chr2 | 167538555 | 167538555 | - | 0          | 0          | -33.96471453 |
| chr2 | 167538568 | 167538568 | + | 0          | 0          | -33.76467394 |
| chr2 | 167538569 | 167538569 | - | 0          | 0          | -32.1007371  |
| chr2 | 167538753 | 167538753 | - | 0          | 0          | -38.89462366 |
| chr2 | 167538797 | 167538797 | - | 1.05E-12   | 4.82E-11   | -26.50756926 |
| chr2 | 167538800 | 167538800 | + | 0          | 0          | -31.71613814 |
| chr2 | 167538801 | 167538801 | - | 0          | 0          | -33.67597476 |
| chr2 | 167538821 | 167538821 | + | 0          | 0          | -45.3567051  |
| chr2 | 167538826 | 167538826 | + | 0          | 0          | -41.73816393 |
| chr2 | 167538843 | 167538843 | + | 0          | 0          | -33.99403834 |
| chr2 | 167538865 | 167538865 | - | 0          | 0          | -27.41988854 |
| chr2 | 167540057 | 167540057 | - | 4.25E-12   | 1.84E-10   | -40.22218916 |
| chr2 | 167540106 | 167540106 | - | 3.18E-08   | 8.47E-07   | -28.26593696 |
| chr2 | 167541594 | 167541594 | + | 9.99E-07   | 2.06E-05   | -30.92621664 |

|      |           |           |   |            |            |              |
|------|-----------|-----------|---|------------|------------|--------------|
| chr2 | 167543447 | 167543447 | + | 5.28E-08   | 1.36E-06   | -39.95121951 |
| chr2 | 167560000 | 167560000 | + | 0          | 0          | -27.56832463 |
| chr2 | 167583350 | 167583350 | + | 0          | 0          | -34.12773511 |
| chr2 | 167583396 | 167583396 | - | 0          | 0          | -32.9493699  |
| chr2 | 167583507 | 167583507 | - | 0          | 0          | -35.15715764 |
| chr2 | 167586232 | 167586232 | + | 1.96E-07   | 4.59E-06   | -41.70363798 |
| chr2 | 167596919 | 167596919 | + | 0          | 0          | -26.27244289 |
| chr2 | 167597393 | 167597393 | + | 0          | 0          | -25.85214749 |
| chr2 | 167597414 | 167597414 | + | 9.00E-10   | 2.99E-08   | -31.21132075 |
| chr2 | 167597427 | 167597427 | + | 6.84E-10   | 2.30E-08   | -30.85714286 |
| chr2 | 167597428 | 167597428 | - | 0          | 0          | -41.76047397 |
| chr2 | 167597429 | 167597429 | + | 3.06E-09   | 9.45E-08   | -32.89473684 |
| chr2 | 167597449 | 167597449 | + | 0          | 0          | -38.98669848 |
| chr2 | 167597499 | 167597499 | - | 0          | 0          | -26.72680685 |
| chr2 | 167597518 | 167597518 | + | 0          | 0          | -34.35399339 |
| chr2 | 167597519 | 167597519 | - | 0          | 0          | -34.04038109 |
| chr2 | 167597532 | 167597532 | - | 0          | 0          | -32.10680706 |
| chr2 | 167597542 | 167597542 | + | 0          | 0          | -30.36964664 |
| chr2 | 167597543 | 167597543 | - | 0          | 0          | -32.07902935 |
| chr2 | 167597552 | 167597552 | + | 3.33E-16   | 2.11E-14   | -27.01800866 |
| chr2 | 167597555 | 167597555 | + | 0          | 0          | -29.12196684 |
| chr2 | 167597589 | 167597589 | + | 0          | 0          | -40.87999698 |
| chr2 | 167597590 | 167597590 | - | 0          | 0          | -32.14161225 |
| chr2 | 167597602 | 167597602 | + | 0          | 0          | -37.7574876  |
| chr2 | 167597603 | 167597603 | - | 0          | 0          | -40.53326174 |
| chr2 | 167597606 | 167597606 | + | 0          | 0          | -36.23540617 |
| chr2 | 167597607 | 167597607 | - | 9.30E-06   | 0.00015511 | -31.64835165 |
| chr2 | 167597621 | 167597621 | + | 0          | 0          | -40.17572816 |
| chr2 | 167597622 | 167597622 | - | 0          | 0          | -43.25953619 |
| chr2 | 167597645 | 167597645 | + | 0          | 0          | -42.82821726 |
| chr2 | 167597646 | 167597646 | - | 0          | 0          | -41.87715561 |
| chr2 | 167597661 | 167597661 | + | 0          | 0          | -33.9071782  |
| chr2 | 167597662 | 167597662 | - | 0          | 0          | -35.72130282 |
| chr2 | 167597705 | 167597705 | - | 0          | 0          | -38.66497372 |
| chr2 | 167599046 | 167599046 | + | 0          | 0          | -28.67582302 |
| chr2 | 167645533 | 167645533 | + | 0          | 0          | -31.28692153 |
| chr2 | 167645534 | 167645534 | - | 0.00042341 | 0.00432563 | -36.06931145 |
| chr2 | 167676187 | 167676187 | - | 8.95E-05   | 0.00114495 | -27.9454023  |
| chr2 | 167688436 | 167688436 | + | 0          | 0          | -28.87039656 |
| chr2 | 167702188 | 167702188 | - | 9.60E-08   | 2.37E-06   | -27.29323308 |
| chr2 | 167731387 | 167731387 | - | 1.16E-10   | 4.28E-09   | -34.69269015 |

|      |           |           |   |            |            |              |
|------|-----------|-----------|---|------------|------------|--------------|
| chr2 | 167747368 | 167747368 | + | 5.55E-16   | 3.46E-14   | -36.71868747 |
| chr2 | 167755292 | 167755292 | + | 6.72E-07   | 1.43E-05   | -25.48920378 |
| chr2 | 167755497 | 167755497 | - | 0          | 0          | -37.35268695 |
| chr2 | 167755501 | 167755501 | + | 0          | 0          | -34.78398318 |
| chr2 | 167755502 | 167755502 | - | 0          | 0          | -37.17353717 |
| chr2 | 167755508 | 167755508 | + | 0          | 0          | -34.51492234 |
| chr2 | 167755516 | 167755516 | + | 0          | 0          | -29.8802516  |
| chr2 | 167842135 | 167842135 | - | 1.01E-09   | 3.35E-08   | -34.10273628 |
| chr2 | 167842145 | 167842145 | - | 2.40E-08   | 6.50E-07   | -29.1334262  |
| chr2 | 167842156 | 167842156 | - | 2.29E-11   | 9.15E-10   | -31.70600414 |
| chr2 | 167852224 | 167852224 | + | 1.24E-14   | 6.89E-13   | -29.30486594 |
| chr2 | 167852225 | 167852225 | - | 0          | 0          | -33.03282178 |
| chr2 | 167852254 | 167852254 | + | 9.74E-05   | 0.00123232 | -38.98496241 |
| chr2 | 167920299 | 167920299 | + | 2.32E-10   | 8.29E-09   | -29.02044855 |
| chr2 | 167975407 | 167975407 | + | 3.58E-05   | 0.00051406 | -25.43498168 |
| chr2 | 167980524 | 167980524 | + | 1.38E-09   | 4.46E-08   | -33.17377099 |
| chr2 | 168115044 | 168115044 | - | 0          | 0          | -29.90750899 |
| chr2 | 168147826 | 168147826 | - | 0.0001584  | 0.00187627 | -27.37449118 |
| chr2 | 168262804 | 168262804 | - | 2.60E-14   | 1.40E-12   | -34.01610443 |
| chr2 | 168268743 | 168268743 | + | 0          | 0          | -25.04141857 |
| chr2 | 168268903 | 168268903 | + | 1.31E-05   | 0.00021004 | -26.4957265  |
| chr2 | 168273252 | 168273252 | + | 2.21E-06   | 4.25E-05   | -27.73109244 |
| chr2 | 168358804 | 168358804 | + | 0          | 0          | -26.5634766  |
| chr2 | 168359065 | 168359065 | - | 0          | 0          | -39.43510338 |
| chr2 | 168359070 | 168359070 | - | 0          | 0          | -26.24928232 |
| chr2 | 168384960 | 168384960 | + | 0.00102137 | 0.00898539 | -30.76923077 |
| chr2 | 168490070 | 168490070 | + | 1.18E-07   | 2.86E-06   | -38.90577508 |
| chr2 | 168527196 | 168527196 | - | 7.61E-05   | 0.00099483 | -27.44539411 |
| chr2 | 168546021 | 168546021 | + | 2.13E-11   | 8.54E-10   | -27.37547893 |
| chr2 | 168553613 | 168553613 | + | 0          | 0          | -29.70548352 |
| chr2 | 168553614 | 168553614 | - | 0          | 0          | -27.78581835 |
| chr2 | 168553771 | 168553771 | + | 0          | 0          | -28.07812916 |
| chr2 | 168562462 | 168562462 | + | 3.55E-05   | 0.00051028 | -28.99799908 |
| chr2 | 168562688 | 168562688 | + | 7.80E-12   | 3.28E-10   | -28.04744526 |
| chr2 | 168562689 | 168562689 | - | 1.69E-06   | 3.32E-05   | -34.43570199 |
| chr2 | 168596769 | 168596769 | - | 9.68E-13   | 4.47E-11   | -32.65169741 |
| chr2 | 168641894 | 168641894 | - | 0          | 0          | -25.0629373  |
| chr2 | 168767080 | 168767080 | + | 4.06E-05   | 0.00057538 | -27.79561263 |
| chr2 | 169033818 | 169033818 | + | 7.73E-05   | 0.00100825 | -31.51920386 |
| chr2 | 169702915 | 169702915 | + | 0          | 0          | -26.09649513 |
| chr2 | 169702916 | 169702916 | - | 7.66E-12   | 3.22E-10   | -26.09870412 |

|      |           |           |   |            |            |              |
|------|-----------|-----------|---|------------|------------|--------------|
| chr2 | 169758319 | 169758319 | + | 6.08E-08   | 1.55E-06   | -32.23243496 |
| chr2 | 170143600 | 170143600 | - | 1.01E-05   | 0.00016699 | -31.09126984 |
| chr2 | 170143602 | 170143602 | - | 4.38E-06   | 7.87E-05   | -27.25177645 |
| chr2 | 170176943 | 170176943 | + | 4.77E-15   | 2.75E-13   | -33.09990663 |
| chr2 | 170177058 | 170177058 | - | 5.05E-07   | 1.10E-05   | -27.66955267 |
| chr2 | 170177132 | 170177132 | - | 1.68E-14   | 9.18E-13   | -29.38305085 |
| chr2 | 170177163 | 170177163 | + | 0          | 0          | -29.40410637 |
| chr2 | 170177172 | 170177172 | + | 0          | 0          | -28.55403058 |
| chr2 | 170177263 | 170177263 | - | 1.59E-08   | 4.42E-07   | -34.34179457 |
| chr2 | 170177686 | 170177686 | + | 0          | 0          | -34.25097441 |
| chr2 | 170177767 | 170177767 | - | 0          | 0          | -28.19385775 |
| chr2 | 170177784 | 170177784 | - | 0          | 0          | -27.5188453  |
| chr2 | 170177794 | 170177794 | - | 0          | 0          | -26.22086862 |
| chr2 | 170177807 | 170177807 | - | 0          | 0          | -34.20162325 |
| chr2 | 170258631 | 170258631 | - | 8.42E-05   | 0.00108564 | -27.2970297  |
| chr2 | 170282628 | 170282628 | + | 1.04E-05   | 0.00017146 | -25.77227011 |
| chr2 | 170288478 | 170288478 | - | 0          | 0          | -26.49664751 |
| chr2 | 170288494 | 170288494 | - | 0          | 0          | -27.41766562 |
| chr2 | 170288496 | 170288496 | + | 1.14E-07   | 2.78E-06   | -25.30513094 |
| chr2 | 170288530 | 170288530 | + | 0          | 0          | -32.63713597 |
| chr2 | 170288549 | 170288549 | + | 0          | 0          | -44.51192266 |
| chr2 | 170288587 | 170288587 | - | 0          | 0          | -32.06163767 |
| chr2 | 170288599 | 170288599 | - | 0          | 0          | -34.02060995 |
| chr2 | 170288619 | 170288619 | - | 0          | 0          | -39.10163736 |
| chr2 | 170400453 | 170400453 | + | 5.51E-06   | 9.69E-05   | -26.12781955 |
| chr2 | 170411033 | 170411033 | - | 6.52E-05   | 0.00087015 | -25.23370726 |
| chr2 | 170438566 | 170438566 | - | 4.20E-09   | 1.27E-07   | -52.94117647 |
| chr2 | 170438824 | 170438824 | - | 1.47E-05   | 0.0002332  | -36.57428442 |
| chr2 | 170438857 | 170438857 | - | 2.10E-06   | 4.04E-05   | -37.82141187 |
| chr2 | 170494879 | 170494879 | + | 0.00053166 | 0.00523753 | -25.80645161 |
| chr2 | 170526631 | 170526631 | - | 2.09E-05   | 0.0003192  | -41.21794872 |
| chr2 | 172916397 | 172916397 | + | 2.30E-13   | 1.13E-11   | -26.51570858 |
| chr2 | 173020502 | 173020502 | + | 1.14E-07   | 2.78E-06   | -43.44333478 |
| chr2 | 173033886 | 173033886 | + | 0          | 0          | -29.23610139 |
| chr2 | 173033935 | 173033935 | + | 0          | 0          | -30.86817423 |
| chr2 | 173034032 | 173034032 | - | 0          | 0          | -30.14682862 |
| chr2 | 173044394 | 173044394 | - | 1.38E-05   | 0.00022049 | -26.31941574 |
| chr2 | 173050065 | 173050065 | - | 2.12E-13   | 1.05E-11   | -32.82176281 |
| chr2 | 173238769 | 173238769 | + | 0          | 0          | -38.14323607 |
| chr2 | 173238807 | 173238807 | + | 0          | 0          | -38.38401908 |
| chr2 | 173238808 | 173238808 | - | 0          | 0          | -31.15245216 |

|      |           |           |   |            |            |              |
|------|-----------|-----------|---|------------|------------|--------------|
| chr2 | 173251007 | 173251007 | - | 0          | 0          | -36.02693603 |
| chr2 | 173251035 | 173251035 | - | 0          | 0          | -28.31087152 |
| chr2 | 173251041 | 173251041 | - | 3.42E-13   | 1.65E-11   | -25.15107158 |
| chr2 | 173253903 | 173253903 | + | 1.03E-10   | 3.84E-09   | -41.38714186 |
| chr2 | 173254141 | 173254141 | + | 0          | 0          | -25.01695524 |
| chr2 | 173254159 | 173254159 | + | 0          | 0          | -34.40760193 |
| chr2 | 173254160 | 173254160 | - | 0          | 0          | -31.42711711 |
| chr2 | 173254204 | 173254204 | + | 3.85E-09   | 1.17E-07   | -28.73517336 |
| chr2 | 173264663 | 173264663 | + | 0          | 0          | -26.38236615 |
| chr2 | 173284610 | 173284610 | + | 8.50E-09   | 2.46E-07   | -36.6703337  |
| chr2 | 173284632 | 173284632 | + | 1.02E-06   | 2.09E-05   | -25.84175084 |
| chr2 | 173335059 | 173335059 | + | 0          | 0          | -38.19165998 |
| chr2 | 173335611 | 173335611 | + | 0          | 0          | -32.09067066 |
| chr2 | 173335641 | 173335641 | + | 0          | 0          | -36.30904334 |
| chr2 | 173335655 | 173335655 | + | 0          | 0          | -27.36116917 |
| chr2 | 173340083 | 173340083 | + | 0          | 0          | -31.40481971 |
| chr2 | 173340084 | 173340084 | - | 0          | 0          | -32.01718857 |
| chr2 | 173340143 | 173340143 | - | 0          | 0          | -44.62315737 |
| chr2 | 173809179 | 173809179 | - | 4.49E-12   | 1.94E-10   | -30.17970313 |
| chr2 | 174075243 | 174075243 | - | 0          | 0          | -37.05651491 |
| chr2 | 174075287 | 174075287 | + | 0          | 0          | -42.11413083 |
| chr2 | 174075288 | 174075288 | - | 0          | 0          | -42.19527672 |
| chr2 | 174075300 | 174075300 | + | 0          | 0          | -33.78465506 |
| chr2 | 174075301 | 174075301 | - | 0          | 0          | -33.38000102 |
| chr2 | 174075413 | 174075413 | - | 0          | 0          | -39.93034826 |
| chr2 | 174460442 | 174460442 | - | 2.20E-05   | 0.00033394 | -44.44444444 |
| chr2 | 174599416 | 174599416 | - | 0          | 0          | -26.46088004 |
| chr2 | 178120060 | 178120060 | + | 0.00063025 | 0.00603346 | -26.07111629 |
| chr2 | 178407245 | 178407245 | - | 9.99E-09   | 2.87E-07   | -25.12525317 |
| chr2 | 180071433 | 180071433 | + | 6.11E-05   | 0.00082249 | -33.91304348 |
| chr2 | 180224309 | 180224309 | + | 0.00052177 | 0.00515488 | -26.04436762 |
| chr2 | 180289814 | 180289814 | - | 0          | 0          | -25.14597082 |
| chr2 | 180337611 | 180337611 | - | 0.00029909 | 0.00322916 | -28.53932584 |
| chr2 | 180346067 | 180346067 | + | 3.82E-05   | 0.00054388 | -27.30669082 |
| chr2 | 180385570 | 180385570 | + | 7.33E-06   | 0.00012525 | -28.0823402  |
| chr2 | 180433548 | 180433548 | - | 4.64E-06   | 8.30E-05   | -30.35714286 |
| chr2 | 180472273 | 180472273 | + | 0          | 0          | -31.32669462 |
| chr2 | 180472394 | 180472394 | + | 0          | 0          | -43.69317638 |
| chr2 | 180472395 | 180472395 | - | 1.92E-14   | 1.05E-12   | -33.2232052  |
| chr2 | 180472585 | 180472585 | - | 0          | 0          | -51.82606264 |
| chr2 | 180472607 | 180472607 | - | 0          | 0          | -37.23135272 |



|      |           |           |   |            |            |              |
|------|-----------|-----------|---|------------|------------|--------------|
| chr2 | 180524879 | 180524879 | - | 1.22E-15   | 7.41E-14   | -25.8610294  |
| chr2 | 180897928 | 180897928 | + | 2.80E-06   | 5.26E-05   | 26.98301698  |
| chr2 | 180952833 | 180952833 | + | 7.14E-05   | 0.00094191 | -31.1486048  |
| chr2 | 181319408 | 181319408 | + | 1.04E-06   | 2.13E-05   | -26.53439153 |
| chr2 | 181319414 | 181319414 | + | 8.34E-07   | 1.74E-05   | -27.98811014 |
| chr2 | 181352847 | 181352847 | + | 0.00018796 | 0.00217321 | -27.08728653 |
| chr2 | 181460439 | 181460439 | - | 0          | 0          | -36.46584362 |
| chr2 | 181670354 | 181670354 | + | 0          | 0          | -46.38613125 |
| chr2 | 181671703 | 181671703 | - | 0          | 0          | -29.40503432 |
| chr2 | 181696990 | 181696990 | + | 0.00059196 | 0.00572746 | -28.57142857 |
| chr3 | 5574949   | 5574949   | - | 1.58E-12   | 7.17E-11   | -25.7598827  |
| chr3 | 5574963   | 5574963   | - | 8.93E-11   | 3.34E-09   | -27.33380682 |
| chr3 | 8717713   | 8717713   | - | 0          | 0          | -27.56166002 |
| chr3 | 9034455   | 9034455   | + | 6.60E-05   | 0.00087969 | -48.06324111 |
| chr3 | 9034456   | 9034456   | - | 2.66E-15   | 1.57E-13   | -34.6092504  |
| chr3 | 9065256   | 9065256   | + | 9.30E-07   | 1.92E-05   | -27.01445632 |
| chr3 | 9347891   | 9347891   | + | 0          | 0          | -31.23669006 |
| chr3 | 9428014   | 9428014   | - | 0.00024153 | 0.00269238 | -29.33563417 |
| chr3 | 14863492  | 14863492  | - | 0          | 0          | -25.68834178 |
| chr3 | 18625440  | 18625440  | + | 0          | 0          | -27.71598816 |
| chr3 | 19060391  | 19060391  | + | 0          | 0          | -28.53964174 |
| chr3 | 19304671  | 19304671  | - | 1.81E-12   | 8.13E-11   | -44.12515361 |
| chr3 | 19304686  | 19304686  | - | 3.08E-11   | 1.21E-09   | -38.24544583 |
| chr3 | 25398732  | 25398732  | + | 0.0002387  | 0.00266556 | -26.60581474 |
| chr3 | 27283075  | 27283075  | - | 1.12E-14   | 6.24E-13   | -43.28644501 |
| chr3 | 27283102  | 27283102  | - | 5.02E-11   | 1.93E-09   | -38.62958227 |
| chr3 | 27283107  | 27283107  | + | 0          | 0          | -34.29520712 |
| chr3 | 27283108  | 27283108  | - | 1.41E-07   | 3.39E-06   | -31.61764706 |
| chr3 | 27283113  | 27283113  | + | 0          | 0          | -32.24887702 |
| chr3 | 27283204  | 27283204  | - | 0          | 0          | -31.34519108 |
| chr3 | 27283214  | 27283214  | - | 0          | 0          | -28.0058651  |
| chr3 | 27283222  | 27283222  | - | 0          | 0          | -37.90854392 |
| chr3 | 27374767  | 27374767  | - | 0.00063214 | 0.00604857 | -26.09707447 |
| chr3 | 28781972  | 28781972  | - | 0          | 0          | -28.95883544 |
| chr3 | 30144154  | 30144154  | + | 9.35E-13   | 4.33E-11   | -27.70002427 |
| chr3 | 30304634  | 30304634  | + | 0          | 0          | -31.20412778 |
| chr3 | 30438184  | 30438184  | + | 0          | 0          | -29.61133489 |
| chr3 | 30438329  | 30438329  | - | 0          | 0          | -25.3593928  |
| chr3 | 30438351  | 30438351  | + | 0          | 0          | -26.41615593 |
| chr3 | 30516012  | 30516012  | - | 0          | 0          | -48.92466068 |
| chr3 | 30516036  | 30516036  | - | 7.51E-09   | 2.19E-07   | -29.02439024 |

|      |          |          |   |            |            |              |
|------|----------|----------|---|------------|------------|--------------|
| chr3 | 34679489 | 34679489 | + | 2.99E-05   | 0.00043835 | -26.67641326 |
| chr3 | 35693709 | 35693709 | - | 5.32E-12   | 2.28E-10   | -27.96960307 |
| chr3 | 36835802 | 36835802 | + | 9.70E-12   | 4.04E-10   | -26.99008309 |
| chr3 | 36835852 | 36835852 | + | 7.12E-12   | 3.01E-10   | -28.32290363 |
| chr3 | 36835958 | 36835958 | - | 0          | 0          | -37.91680883 |
| chr3 | 36835987 | 36835987 | - | 0          | 0          | -32.37040031 |
| chr3 | 36835998 | 36835998 | - | 0          | 0          | -30.08091092 |
| chr3 | 37181535 | 37181535 | - | 9.51E-10   | 3.15E-08   | -28.25767505 |
| chr3 | 37596099 | 37596099 | - | 0          | 0          | -26.59336748 |
| chr3 | 37667994 | 37667994 | - | 0          | 0          | -30.25859077 |
| chr3 | 37686462 | 37686462 | + | 0          | 0          | -28.89842727 |
| chr3 | 37686478 | 37686478 | + | 0          | 0          | -30.71348194 |
| chr3 | 37686479 | 37686479 | - | 0          | 0          | -25.34944691 |
| chr3 | 37686503 | 37686503 | + | 0          | 0          | -36.47422606 |
| chr3 | 37686504 | 37686504 | - | 0          | 0          | -31.23531796 |
| chr3 | 37686931 | 37686931 | - | 1.32E-06   | 2.65E-05   | -25.69573284 |
| chr3 | 41409187 | 41409187 | + | 3.99E-07   | 8.84E-06   | -29.73383568 |
| chr3 | 41445978 | 41445978 | - | 7.70E-13   | 3.59E-11   | -38.72737664 |
| chr3 | 41446028 | 41446028 | - | 5.61E-09   | 1.67E-07   | -29.96948561 |
| chr3 | 41497743 | 41497743 | - | 0          | 0          | -27.16309252 |
| chr3 | 41497751 | 41497751 | + | 0          | 0          | -25.26169794 |
| chr3 | 41497752 | 41497752 | - | 0          | 0          | -29.56534676 |
| chr3 | 41497777 | 41497777 | + | 0          | 0          | -29.39624853 |
| chr3 | 41497778 | 41497778 | - | 0          | 0          | -33.16234374 |
| chr3 | 41581227 | 41581227 | + | 0          | 0          | -26.13841275 |
| chr3 | 41604502 | 41604502 | + | 1.51E-07   | 3.60E-06   | -26.84799547 |
| chr3 | 41607405 | 41607405 | - | 3.82E-05   | 0.0005438  | -26.82926829 |
| chr3 | 51223862 | 51223862 | + | 0.0008348  | 0.00761257 | -29.62962963 |
| chr3 | 51397902 | 51397902 | + | 3.80E-05   | 0.00054173 | -26.74089069 |
| chr3 | 51503389 | 51503389 | - | 0          | 0          | -27.37825257 |
| chr3 | 51673773 | 51673773 | - | 0          | 0          | -26.41374945 |
| chr3 | 52003411 | 52003411 | + | 7.08E-07   | 1.50E-05   | -31.43921751 |
| chr3 | 52044998 | 52044998 | - | 1.74E-09   | 5.56E-08   | -33.14523484 |
| chr3 | 52176584 | 52176584 | - | 1.34E-08   | 3.77E-07   | -28.13449394 |
| chr3 | 52393389 | 52393389 | - | 0          | 0          | -32.63898881 |
| chr3 | 52641051 | 52641051 | + | 7.25E-05   | 0.00095419 | -25.80645161 |
| chr3 | 52890975 | 52890975 | - | 0          | 0          | -34.33104008 |
| chr3 | 53044923 | 53044923 | - | 0          | 0          | -29.17337473 |
| chr3 | 57516226 | 57516226 | + | 2.40E-10   | 8.54E-09   | -30.28169014 |
| chr3 | 57516227 | 57516227 | - | 1.36E-06   | 2.72E-05   | -39.86013986 |
| chr3 | 58237135 | 58237135 | - | 0.00066496 | 0.00630899 | -34.75274725 |

|      |          |          |   |            |            |              |
|------|----------|----------|---|------------|------------|--------------|
| chr3 | 58237140 | 58237140 | - | 0.00032413 | 0.00345614 | -32.6007326  |
| chr3 | 58987284 | 58987284 | + | 0          | 0          | -35.06286278 |
| chr3 | 58987297 | 58987297 | + | 0          | 0          | -38.33637683 |
| chr3 | 58987298 | 58987298 | - | 0          | 0          | -31.09885175 |
| chr3 | 58987319 | 58987319 | + | 0          | 0          | -35.31354598 |
| chr3 | 58987320 | 58987320 | - | 0          | 0          | -31.35739496 |
| chr3 | 58987321 | 58987321 | + | 0          | 0          | -38.6864334  |
| chr3 | 58987322 | 58987322 | - | 0          | 0          | -37.94480926 |
| chr3 | 59258099 | 59258099 | + | 8.79E-10   | 2.92E-08   | -38.65612648 |
| chr3 | 59258124 | 59258124 | + | 4.76E-13   | 2.27E-11   | -45.17786561 |
| chr3 | 59258148 | 59258148 | + | 1.42E-09   | 4.59E-08   | -38.62928349 |
| chr3 | 62340212 | 62340212 | + | 0          | 0          | -46.35159065 |
| chr3 | 62340364 | 62340364 | - | 2.07E-06   | 3.99E-05   | -33.07890563 |
| chr3 | 62340391 | 62340391 | - | 4.43E-08   | 1.15E-06   | -35.28753636 |
| chr3 | 65174607 | 65174607 | + | 0.00040378 | 0.00415722 | 50.79051383  |
| chr3 | 65494591 | 65494591 | + | 7.77E-16   | 4.79E-14   | -31.08108108 |
| chr3 | 65494899 | 65494899 | - | 3.34E-10   | 1.17E-08   | -30.26881006 |
| chr3 | 65871178 | 65871178 | + | 3.32E-12   | 1.45E-10   | -30.77175267 |
| chr3 | 65871192 | 65871192 | + | 0          | 0          | -43.85091443 |
| chr3 | 65871271 | 65871271 | - | 1.21E-14   | 6.71E-13   | -29.96162834 |
| chr3 | 65871300 | 65871300 | - | 0          | 0          | -51.51656315 |
| chr3 | 68375240 | 68375240 | - | 5.38E-10   | 1.84E-08   | -32.21971849 |
| chr3 | 68386030 | 68386030 | - | 5.73E-05   | 0.00077683 | -42.74092616 |
| chr3 | 68495966 | 68495966 | - | 2.38E-14   | 1.28E-12   | -27.36463094 |
| chr3 | 68967656 | 68967656 | + | 0          | 0          | -41.32742464 |
| chr3 | 68967794 | 68967794 | - | 0          | 0          | -30.04329004 |
| chr3 | 79181782 | 79181782 | + | 7.62E-08   | 1.91E-06   | -25.90496157 |
| chr3 | 79549343 | 79549343 | - | 2.68E-05   | 0.0003979  | -28.10701956 |
| chr3 | 79593975 | 79593975 | - | 0.00041408 | 0.00424574 | -33.83364603 |
| chr3 | 80019440 | 80019440 | + | 0.00050399 | 0.00500747 | -31.65217391 |
| chr3 | 80801363 | 80801363 | - | 2.80E-06   | 5.27E-05   | -26.24920669 |
| chr3 | 83988720 | 83988720 | + | 2.33E-15   | 1.38E-13   | -31.89469564 |
| chr3 | 84129543 | 84129543 | + | 0          | 0          | -33.05556718 |
| chr3 | 84129563 | 84129563 | + | 0          | 0          | -25.7323417  |
| chr3 | 84129667 | 84129667 | - | 0          | 0          | -27.17322479 |
| chr3 | 84229135 | 84229135 | - | 0          | 0          | -31.55634604 |
| chr3 | 84229246 | 84229246 | - | 0          | 0          | -32.09643367 |
| chr3 | 84229265 | 84229265 | - | 0          | 0          | -38.727897   |
| chr3 | 84235516 | 84235516 | + | 0          | 0          | -25.6058474  |
| chr3 | 84270672 | 84270672 | - | 0          | 0          | -26.48410415 |
| chr3 | 84306004 | 84306004 | - | 9.26E-05   | 0.00117995 | -31.37829912 |

|      |          |          |   |            |            |              |
|------|----------|----------|---|------------|------------|--------------|
| chr3 | 84337411 | 84337411 | - | 3.71E-06   | 6.78E-05   | -37.15728716 |
| chr3 | 84446282 | 84446282 | + | 0          | 0          | -25.1433762  |
| chr3 | 84446329 | 84446329 | - | 0          | 0          | -25.84899055 |
| chr3 | 84479225 | 84479225 | - | 0          | 0          | -52.28154802 |
| chr3 | 84479229 | 84479229 | - | 3.33E-16   | 2.11E-14   | -27.50645498 |
| chr3 | 84557941 | 84557941 | - | 1.87E-05   | 0.00028997 | -30.69072353 |
| chr3 | 84665728 | 84665728 | + | 0          | 0          | -26.35791091 |
| chr3 | 84665729 | 84665729 | - | 0          | 0          | -32.8485854  |
| chr3 | 85064358 | 85064358 | - | 1.50E-05   | 0.0002382  | -31.0877193  |
| chr3 | 85174733 | 85174733 | - | 3.09E-05   | 0.00045114 | -37.20685112 |
| chr3 | 85174757 | 85174757 | + | 2.19E-11   | 8.79E-10   | -28.41240912 |
| chr3 | 85174758 | 85174758 | - | 0.00084467 | 0.00768714 | -29.36877076 |
| chr3 | 85186668 | 85186668 | + | 9.37E-05   | 0.00119167 | -25.9954844  |
| chr3 | 85993931 | 85993931 | + | 0          | 0          | -26.35844005 |
| chr3 | 85993969 | 85993969 | + | 0          | 0          | -25.22200898 |
| chr3 | 86550182 | 86550182 | + | 0          | 0          | -70.97091195 |
| chr3 | 86550203 | 86550203 | + | 0          | 0          | -69.57858564 |
| chr3 | 87093623 | 87093623 | - | 0          | 0          | -34.82707025 |
| chr3 | 87093634 | 87093634 | - | 1.99E-11   | 8.00E-10   | -25.83882994 |
| chr3 | 87748559 | 87748559 | - | 5.09E-12   | 2.18E-10   | -25.94297492 |
| chr3 | 87778608 | 87778608 | + | 1.59E-13   | 7.93E-12   | -29.72022033 |
| chr3 | 87809396 | 87809396 | + | 1.75E-11   | 7.11E-10   | -47.72727273 |
| chr3 | 87810101 | 87810101 | + | 0          | 0          | -27.47711453 |
| chr3 | 87810102 | 87810102 | - | 1.55E-14   | 8.54E-13   | -28.85638043 |
| chr3 | 87810107 | 87810107 | + | 0          | 0          | -36.5529142  |
| chr3 | 87810111 | 87810111 | + | 8.22E-15   | 4.63E-13   | -26.99293872 |
| chr3 | 87810306 | 87810306 | - | 0          | 0          | -26.00263604 |
| chr3 | 87816285 | 87816285 | + | 3.76E-05   | 0.00053604 | -26.69509595 |
| chr3 | 87959539 | 87959539 | - | 0          | 0          | -29.9772833  |
| chr3 | 87972852 | 87972852 | + | 0          | 0          | -29.36903358 |
| chr3 | 87972853 | 87972853 | - | 4.54E-12   | 1.96E-10   | -35.27607362 |
| chr3 | 87972886 | 87972886 | + | 0          | 0          | -27.98824508 |
| chr3 | 87972978 | 87972978 | - | 0          | 0          | -36.52799378 |
| chr3 | 87983516 | 87983516 | - | 0          | 0          | -56.03945654 |
| chr3 | 87983537 | 87983537 | - | 0          | 0          | -55.97870598 |
| chr3 | 87983563 | 87983563 | - | 3.74E-12   | 1.63E-10   | -28.73237873 |
| chr3 | 88030863 | 88030863 | + | 5.26E-08   | 1.35E-06   | -32.47499468 |
| chr3 | 88158025 | 88158025 | + | 0          | 0          | -35.9764444  |
| chr3 | 88158077 | 88158077 | + | 0          | 0          | -31.54652981 |
| chr3 | 88158128 | 88158128 | - | 0          | 0          | -32.63922377 |
| chr3 | 88158130 | 88158130 | + | 0          | 0          | -30.70679155 |

|      |          |          |   |          |          |              |
|------|----------|----------|---|----------|----------|--------------|
| chr3 | 88158163 | 88158163 | + | 0        | 0        | -43.443099   |
| chr3 | 88158164 | 88158164 | - | 0        | 0        | -35.0389266  |
| chr3 | 88158206 | 88158206 | + | 7.54E-09 | 2.20E-07 | -28.17498176 |
| chr3 | 88158222 | 88158222 | + | 1.46E-10 | 5.33E-09 | -25.94487463 |
| chr3 | 88170522 | 88170522 | + | 2.09E-07 | 4.87E-06 | -33.36880187 |
| chr3 | 88221996 | 88221996 | + | 5.46E-07 | 1.18E-05 | -25.51209104 |
| chr3 | 88333117 | 88333117 | + | 4.10E-07 | 9.06E-06 | -26.74936387 |
| chr3 | 88364569 | 88364569 | + | 0        | 0        | -26.7735417  |
| chr3 | 88364570 | 88364570 | - | 0        | 0        | -25.48115801 |
| chr3 | 88364584 | 88364584 | + | 0        | 0        | -35.80510065 |
| chr3 | 88364585 | 88364585 | - | 0        | 0        | -25.72126759 |
| chr3 | 88364592 | 88364592 | + | 2.96E-12 | 1.30E-10 | -26.63775645 |
| chr3 | 88364599 | 88364599 | - | 0        | 0        | -25.15938623 |
| chr3 | 88364609 | 88364609 | - | 0        | 0        | -25.84268898 |
| chr3 | 88366237 | 88366237 | - | 0        | 0        | -26.20548027 |
| chr3 | 88366245 | 88366245 | - | 0        | 0        | -25.6736457  |
| chr3 | 88493399 | 88493399 | - | 0        | 0        | -26.59712305 |
| chr3 | 88536361 | 88536361 | - | 0        | 0        | -37.80794369 |
| chr3 | 88536383 | 88536383 | - | 0        | 0        | -38.31320195 |
| chr3 | 88536402 | 88536402 | + | 4.44E-16 | 2.79E-14 | -42.30780581 |
| chr3 | 88536403 | 88536403 | - | 0        | 0        | -47.24489084 |
| chr3 | 88536408 | 88536408 | + | 4.01E-13 | 1.93E-11 | -36.8451008  |
| chr3 | 88536409 | 88536409 | - | 3.70E-07 | 8.25E-06 | -25.86726998 |
| chr3 | 88536410 | 88536410 | + | 0        | 0        | -42.59053954 |
| chr3 | 88536411 | 88536411 | - | 2.90E-08 | 7.79E-07 | -29.91797329 |
| chr3 | 88536416 | 88536416 | + | 1.11E-16 | 7.26E-15 | -41.20660216 |
| chr3 | 88536417 | 88536417 | - | 4.50E-14 | 2.37E-12 | -38.76190476 |
| chr3 | 88536432 | 88536432 | - | 1.96E-10 | 7.07E-09 | -34.9847561  |
| chr3 | 88536439 | 88536439 | + | 0        | 0        | -40.52174349 |
| chr3 | 88536446 | 88536446 | + | 0        | 0        | -52.82613928 |
| chr3 | 88536447 | 88536447 | - | 0        | 0        | -53.17163962 |
| chr3 | 88536453 | 88536453 | + | 0        | 0        | -43.53026225 |
| chr3 | 88536454 | 88536454 | - | 0        | 0        | -45.19944712 |
| chr3 | 88536457 | 88536457 | + | 0        | 0        | -49.00748234 |
| chr3 | 88536458 | 88536458 | - | 0        | 0        | -50.76360814 |
| chr3 | 88536459 | 88536459 | + | 0        | 0        | -51.35790141 |
| chr3 | 88536460 | 88536460 | - | 0        | 0        | -50.57975947 |
| chr3 | 88536470 | 88536470 | + | 0        | 0        | -50.60625463 |
| chr3 | 88536471 | 88536471 | - | 0        | 0        | -58.0224681  |
| chr3 | 88536475 | 88536475 | + | 0        | 0        | -50.09328918 |
| chr3 | 88536476 | 88536476 | - | 0        | 0        | -58.02476632 |

|      |          |          |   |            |            |              |
|------|----------|----------|---|------------|------------|--------------|
| chr3 | 88536482 | 88536482 | + | 0          | 0          | -48.45867038 |
| chr3 | 88536483 | 88536483 | - | 0          | 0          | -55.14044539 |
| chr3 | 88536489 | 88536489 | + | 0          | 0          | -54.11199219 |
| chr3 | 88536490 | 88536490 | - | 0          | 0          | -55.65774251 |
| chr3 | 88536494 | 88536494 | + | 0          | 0          | -39.42168942 |
| chr3 | 88536495 | 88536495 | - | 0          | 0          | -36.13905325 |
| chr3 | 88536518 | 88536518 | + | 0          | 0          | -34.99975251 |
| chr3 | 88536521 | 88536521 | + | 0          | 0          | -48.9434201  |
| chr3 | 88536524 | 88536524 | + | 0          | 0          | -45.4284083  |
| chr3 | 88536682 | 88536682 | - | 0          | 0          | -28.09019442 |
| chr3 | 88536690 | 88536690 | - | 0          | 0          | -36.59474206 |
| chr3 | 88536699 | 88536699 | - | 0          | 0          | -32.40948639 |
| chr3 | 88536717 | 88536717 | - | 0          | 0          | -30.78431373 |
| chr3 | 88536730 | 88536730 | + | 0          | 0          | -53.92278954 |
| chr3 | 88536731 | 88536731 | - | 0          | 0          | -30.29291835 |
| chr3 | 88536737 | 88536737 | + | 0          | 0          | -54.58333333 |
| chr3 | 88536755 | 88536755 | + | 0          | 0          | -53.96392487 |
| chr3 | 88536767 | 88536767 | + | 0          | 0          | -64.17865707 |
| chr3 | 88536888 | 88536888 | - | 0          | 0          | -47.25213917 |
| chr3 | 88536890 | 88536890 | - | 0          | 0          | -37.93509975 |
| chr3 | 88536895 | 88536895 | - | 0          | 0          | -48.89736022 |
| chr3 | 88536914 | 88536914 | - | 0          | 0          | -45.33187026 |
| chr3 | 88536933 | 88536933 | - | 0          | 0          | -37.58605374 |
| chr3 | 88536953 | 88536953 | + | 0          | 0          | -26.14274955 |
| chr3 | 88542328 | 88542328 | + | 4.74E-09   | 1.42E-07   | -25.04383105 |
| chr3 | 88649364 | 88649364 | + | 2.21E-06   | 4.24E-05   | -30.51739927 |
| chr3 | 88650676 | 88650676 | - | 1.49E-06   | 2.96E-05   | -37.1957672  |
| chr3 | 89244197 | 89244197 | + | 0          | 0          | -30.11132806 |
| chr3 | 89244257 | 89244257 | - | 0          | 0          | -30.89318012 |
| chr3 | 89244321 | 89244321 | + | 0          | 0          | -38.87578005 |
| chr3 | 89244469 | 89244469 | - | 3.11E-15   | 1.82E-13   | -27.53325942 |
| chr3 | 89281702 | 89281702 | + | 0.00010998 | 0.00136833 | -31.50105708 |
| chr3 | 89327515 | 89327515 | + | 0          | 0          | -25.30312566 |
| chr3 | 89348436 | 89348436 | + | 0          | 0          | -31.44272812 |
| chr3 | 89348437 | 89348437 | - | 2.35E-05   | 0.00035483 | -33.64296081 |
| chr3 | 89348479 | 89348479 | + | 0          | 0          | -35.36004396 |
| chr3 | 89349133 | 89349133 | - | 0          | 0          | -28.85952606 |
| chr3 | 89379903 | 89379903 | + | 0          | 0          | -28.41225745 |
| chr3 | 89390174 | 89390174 | + | 0.00095847 | 0.0085281  | -30          |
| chr3 | 89391186 | 89391186 | - | 1.97E-07   | 4.61E-06   | -51.11627907 |
| chr3 | 89391214 | 89391214 | - | 1.14E-09   | 3.74E-08   | -55.49630845 |

|      |          |          |   |          |          |              |
|------|----------|----------|---|----------|----------|--------------|
| chr3 | 89799729 | 89799729 | + | 0        | 0        | -25.46977264 |
| chr3 | 89799879 | 89799879 | + | 0        | 0        | -25.55875941 |
| chr3 | 89799880 | 89799880 | - | 0        | 0        | -28.87556892 |
| chr3 | 89830697 | 89830697 | - | 0        | 0        | -26.14608712 |
| chr3 | 89831984 | 89831984 | - | 0        | 0        | -34.72691692 |
| chr3 | 89833637 | 89833637 | + | 0        | 0        | -30.76405821 |
| chr3 | 89906239 | 89906239 | + | 0        | 0        | -29.13238862 |
| chr3 | 89913952 | 89913952 | + | 0        | 0        | -31.28579893 |
| chr3 | 90243504 | 90243504 | + | 0        | 0        | -31.51450466 |
| chr3 | 90243514 | 90243514 | + | 0        | 0        | -25.17443025 |
| chr3 | 90243570 | 90243570 | + | 0        | 0        | -27.60143028 |
| chr3 | 90243571 | 90243571 | - | 0        | 0        | -28.51876087 |
| chr3 | 90243598 | 90243598 | + | 0        | 0        | -33.5929633  |
| chr3 | 90243607 | 90243607 | + | 0        | 0        | -31.88465294 |
| chr3 | 90243615 | 90243615 | + | 0        | 0        | -29.37921179 |
| chr3 | 90243671 | 90243671 | + | 3.06E-14 | 1.64E-12 | -32.30769231 |
| chr3 | 90243672 | 90243672 | - | 0        | 0        | -31.3855974  |
| chr3 | 90464646 | 90464646 | + | 0        | 0        | -42.39161161 |
| chr3 | 90464724 | 90464724 | - | 0        | 0        | -36.7618756  |
| chr3 | 90464747 | 90464747 | + | 0        | 0        | -36.06768737 |
| chr3 | 90464748 | 90464748 | - | 0        | 0        | -34.5475068  |
| chr3 | 90464759 | 90464759 | + | 0        | 0        | -30.24455389 |
| chr3 | 90464761 | 90464761 | + | 0        | 0        | -34.4501097  |
| chr3 | 90464763 | 90464763 | + | 0        | 0        | -32.1156437  |
| chr3 | 90464772 | 90464772 | + | 0        | 0        | -30.89620993 |
| chr3 | 94371828 | 94371828 | + | 1.89E-13 | 9.35E-12 | -43.80952381 |
| chr3 | 94485526 | 94485526 | - | 0        | 0        | -26.68918919 |
| chr3 | 95014029 | 95014029 | - | 0        | 0        | -26.94060008 |
| chr3 | 95024849 | 95024849 | + | 0        | 0        | -29.28962781 |
| chr3 | 95024854 | 95024854 | + | 0        | 0        | -28.19429756 |
| chr3 | 95140393 | 95140393 | + | 3.33E-11 | 1.31E-09 | -26.62337662 |
| chr3 | 95172573 | 95172573 | + | 5.40E-07 | 1.17E-05 | -42.85714286 |
| chr3 | 95172594 | 95172594 | + | 1.87E-07 | 4.39E-06 | -39.43661972 |
| chr3 | 95172619 | 95172619 | + | 0        | 0        | -33.70588235 |
| chr3 | 95172620 | 95172620 | - | 0        | 0        | -25.49408627 |
| chr3 | 95172633 | 95172633 | - | 0        | 0        | -26.84038928 |
| chr3 | 95172676 | 95172676 | + | 0        | 0        | -35.60428059 |
| chr3 | 95172681 | 95172681 | + | 0        | 0        | -39.63785327 |
| chr3 | 95172725 | 95172725 | - | 0        | 0        | -33.2303437  |
| chr3 | 95172731 | 95172731 | - | 0        | 0        | -32.67568003 |
| chr3 | 95172736 | 95172736 | - | 0        | 0        | -30.44749313 |

|      |          |          |   |          |            |              |
|------|----------|----------|---|----------|------------|--------------|
| chr3 | 95172738 | 95172738 | - | 0        | 0          | -26.43624668 |
| chr3 | 95172757 | 95172757 | - | 0        | 0          | -34.74814977 |
| chr3 | 95172772 | 95172772 | + | 0        | 0          | -28.68085442 |
| chr3 | 95172780 | 95172780 | + | 0        | 0          | -39.60231618 |
| chr3 | 95172795 | 95172795 | + | 0        | 0          | -37.79456183 |
| chr3 | 95172812 | 95172812 | + | 0        | 0          | -29.21652922 |
| chr3 | 95172835 | 95172835 | - | 0        | 0          | -32.39229999 |
| chr3 | 95172851 | 95172851 | - | 0        | 0          | -37.64431098 |
| chr3 | 95172860 | 95172860 | - | 0        | 0          | -32.36367034 |
| chr3 | 95172866 | 95172866 | - | 0        | 0          | -27.33323925 |
| chr3 | 95172882 | 95172882 | - | 0        | 0          | -26.93803024 |
| chr3 | 95172951 | 95172951 | + | 9.99E-16 | 6.10E-14   | -26.94444444 |
| chr3 | 95173046 | 95173046 | - | 0        | 0          | -25.02922718 |
| chr3 | 95173100 | 95173100 | + | 0        | 0          | -29.73376009 |
| chr3 | 95232045 | 95232045 | - | 0        | 0          | -25.87301016 |
| chr3 | 95232078 | 95232078 | - | 0        | 0          | -28.80766092 |
| chr3 | 95240893 | 95240893 | - | 0        | 0          | -31.03608347 |
| chr3 | 95240923 | 95240923 | - | 0        | 0          | -27.19843842 |
| chr3 | 95240927 | 95240927 | - | 0        | 0          | -31.52134368 |
| chr3 | 95241141 | 95241141 | - | 2.15E-10 | 7.72E-09   | -31.04210899 |
| chr3 | 95241177 | 95241177 | + | 0        | 0          | -46.29932986 |
| chr3 | 95241178 | 95241178 | - | 4.27E-14 | 2.25E-12   | -39.04109589 |
| chr3 | 95681529 | 95681529 | + | 0        | 0          | -31.61801019 |
| chr3 | 95681570 | 95681570 | + | 0        | 0          | -36.51151887 |
| chr3 | 95681574 | 95681574 | + | 0        | 0          | -31.71638408 |
| chr3 | 95681673 | 95681673 | - | 2.28E-08 | 6.22E-07   | -39.90812518 |
| chr3 | 95681703 | 95681703 | + | 0        | 0          | -30.26757985 |
| chr3 | 95681704 | 95681704 | - | 1.16E-08 | 3.31E-07   | -42.64870932 |
| chr3 | 95681797 | 95681797 | - | 0        | 0          | -26.05078273 |
| chr3 | 95684229 | 95684229 | - | 0        | 0          | -49.06363414 |
| chr3 | 95684234 | 95684234 | + | 6.16E-06 | 0.00010718 | -32.76333789 |
| chr3 | 95684235 | 95684235 | - | 0        | 0          | -33.59966181 |
| chr3 | 95684281 | 95684281 | + | 7.44E-07 | 1.57E-05   | -34.57142857 |
| chr3 | 96464130 | 96464130 | + | 0        | 0          | -33.58863393 |
| chr3 | 96464480 | 96464480 | - | 8.98E-10 | 2.98E-08   | -27.7258567  |
| chr3 | 96465888 | 96465888 | + | 0        | 0          | -28.29338076 |
| chr3 | 96465948 | 96465948 | - | 2.22E-16 | 1.43E-14   | -35.97673473 |
| chr3 | 96528490 | 96528490 | - | 0        | 0          | -29.90540404 |
| chr3 | 96598917 | 96598917 | - | 0        | 0          | -35.85974784 |
| chr3 | 96598964 | 96598964 | + | 0        | 0          | -33.19073916 |
| chr3 | 96598983 | 96598983 | + | 0        | 0          | -34.10136986 |



|      |           |           |   |            |            |              |
|------|-----------|-----------|---|------------|------------|--------------|
| chr3 | 96599129  | 96599129  | - | 3.33E-16   | 2.11E-14   | -27.76163431 |
| chr3 | 96937858  | 96937858  | + | 2.39E-05   | 0.00035942 | -25.49781104 |
| chr3 | 97209903  | 97209903  | + | 0.00011788 | 0.00145277 | -33.26669332 |
| chr3 | 97254673  | 97254673  | - | 5.55E-14   | 2.90E-12   | -25.97305311 |
| chr3 | 97312123  | 97312123  | + | 2.93E-10   | 1.03E-08   | -26.7316366  |
| chr3 | 97312140  | 97312140  | + | 0          | 0          | -33.62686873 |
| chr3 | 97312290  | 97312290  | - | 0          | 0          | -40.19041506 |
| chr3 | 97312299  | 97312299  | - | 0          | 0          | -39.68287037 |
| chr3 | 97312305  | 97312305  | - | 0          | 0          | -42.10640249 |
| chr3 | 97312311  | 97312311  | - | 0          | 0          | -36.99331596 |
| chr3 | 97312319  | 97312319  | - | 0          | 0          | -31.86336562 |
| chr3 | 97546427  | 97546427  | - | 1.94E-12   | 8.70E-11   | -33.83966245 |
| chr3 | 98019175  | 98019175  | - | 1.89E-15   | 1.13E-13   | -25.91182443 |
| chr3 | 98019185  | 98019185  | + | 7.77E-16   | 4.79E-14   | -27.17439075 |
| chr3 | 98024541  | 98024541  | + | 0          | 0          | -31.39952902 |
| chr3 | 98024551  | 98024551  | + | 0          | 0          | -32.31444339 |
| chr3 | 98024559  | 98024559  | + | 0          | 0          | -32.256783   |
| chr3 | 98024636  | 98024636  | - | 0          | 0          | -34.63118581 |
| chr3 | 98991519  | 98991519  | - | 3.04E-07   | 6.89E-06   | 28.02236198  |
| chr3 | 100994093 | 100994093 | - | 9.46E-06   | 0.00015742 | 42.30769231  |
| chr3 | 101130963 | 101130963 | + | 0.00069178 | 0.00651716 | -35.16483516 |
| chr3 | 101161710 | 101161710 | + | 4.94E-08   | 1.28E-06   | -26.7441597  |
| chr3 | 101161741 | 101161741 | + | 0          | 0          | -28.35832707 |
| chr3 | 101161742 | 101161742 | - | 8.53E-13   | 3.96E-11   | -34.27086369 |
| chr3 | 101387977 | 101387977 | + | 8.14E-07   | 1.70E-05   | -31.09642094 |
| chr3 | 101387986 | 101387986 | + | 7.86E-12   | 3.30E-10   | -43.2367829  |
| chr3 | 101387989 | 101387989 | + | 9.94E-13   | 4.59E-11   | -44.74676724 |
| chr3 | 101409183 | 101409183 | - | 0.0001977  | 0.00226874 | -31.9047619  |
| chr3 | 101419651 | 101419651 | - | 6.00E-13   | 2.83E-11   | -28.25641026 |
| chr3 | 101653676 | 101653676 | + | 2.33E-05   | 0.00035257 | -45.16129032 |
| chr3 | 101713145 | 101713145 | + | 3.17E-08   | 8.45E-07   | -26.14652208 |
| chr3 | 101713407 | 101713407 | + | 0          | 0          | -30.28866934 |
| chr3 | 101713543 | 101713543 | - | 0          | 0          | -28.64633919 |
| chr3 | 102081671 | 102081671 | + | 9.19E-09   | 2.65E-07   | -26.77350427 |
| chr3 | 102135972 | 102135972 | - | 3.01E-13   | 1.46E-11   | -29.73263076 |
| chr3 | 103147204 | 103147204 | + | 3.28E-05   | 0.00047649 | -35.48387097 |
| chr3 | 103375542 | 103375542 | + | 0          | 0          | -25.90090156 |
| chr3 | 103375543 | 103375543 | - | 1.11E-16   | 7.26E-15   | -28.45441825 |
| chr3 | 103375710 | 103375710 | - | 0          | 0          | -30.28406228 |
| chr3 | 103537946 | 103537946 | + | 5.96E-09   | 1.77E-07   | -28.61852053 |
| chr3 | 103803008 | 103803008 | + | 0          | 0          | -26.48899543 |

|      |           |           |   |            |            |              |
|------|-----------|-----------|---|------------|------------|--------------|
| chr3 | 104226952 | 104226952 | + | 0          | 0          | -27.8010878  |
| chr3 | 104541799 | 104541799 | - | 8.36E-11   | 3.14E-09   | -42.75281382 |
| chr3 | 104541813 | 104541813 | - | 2.69E-08   | 7.24E-07   | -37.46312684 |
| chr3 | 104560448 | 104560448 | - | 0.00063027 | 0.00603364 | -37.04545455 |
| chr3 | 104784083 | 104784083 | + | 0          | 0          | -29.45777946 |
| chr3 | 104784113 | 104784113 | + | 0          | 0          | -29.33371614 |
| chr3 | 104789880 | 104789880 | + | 0          | 0          | -38.18226484 |
| chr3 | 104789899 | 104789899 | + | 0          | 0          | -39.51813392 |
| chr3 | 104789990 | 104789990 | - | 0          | 0          | -30.07502158 |
| chr3 | 104790002 | 104790002 | + | 0          | 0          | -25.93559446 |
| chr3 | 104790003 | 104790003 | - | 0          | 0          | -40.36027924 |
| chr3 | 104790061 | 104790061 | - | 0          | 0          | -36.03413546 |
| chr3 | 104790087 | 104790087 | - | 0          | 0          | -33.26932627 |
| chr3 | 104790149 | 104790149 | - | 0          | 0          | -25.88279339 |
| chr3 | 104793932 | 104793932 | + | 0          | 0          | -38.67910801 |
| chr3 | 104793940 | 104793940 | + | 0          | 0          | -42.96572286 |
| chr3 | 104793964 | 104793964 | - | 0          | 0          | -42.90568382 |
| chr3 | 104793988 | 104793988 | - | 0          | 0          | -37.72722414 |
| chr3 | 104793992 | 104793992 | - | 0          | 0          | -45.31530002 |
| chr3 | 104794006 | 104794006 | - | 0          | 0          | -32.0009079  |
| chr3 | 104794020 | 104794020 | + | 5.17E-05   | 0.00070982 | -40.82719083 |
| chr3 | 104794230 | 104794230 | - | 4.22E-14   | 2.23E-12   | -28.4523378  |
| chr3 | 105036706 | 105036706 | + | 0          | 0          | -26.26040393 |
| chr3 | 105529846 | 105529846 | + | 0          | 0          | -25.96164429 |
| chr3 | 105529847 | 105529847 | - | 9.95E-10   | 3.29E-08   | -28.63598705 |
| chr3 | 105529906 | 105529906 | - | 0          | 0          | -28.57123231 |
| chr3 | 105546715 | 105546715 | - | 0          | 0          | -27.00067438 |
| chr3 | 105704214 | 105704214 | + | 0.00053629 | 0.00527622 | -37.10541989 |
| chr3 | 105704234 | 105704234 | + | 6.53E-05   | 0.00087126 | -29.0263319  |
| chr3 | 105718376 | 105718376 | + | 4.72E-07   | 1.03E-05   | -25.33783784 |
| chr3 | 105894064 | 105894064 | + | 1.15E-07   | 2.81E-06   | -27.22505958 |
| chr3 | 108197366 | 108197366 | + | 0          | 0          | -34.29149798 |
| chr3 | 108197374 | 108197374 | + | 0          | 0          | -52.04869623 |
| chr3 | 108197375 | 108197375 | - | 0          | 0          | -49.48465972 |
| chr3 | 108197401 | 108197401 | + | 0          | 0          | -52.04678816 |
| chr3 | 108197402 | 108197402 | - | 0          | 0          | -54.84357262 |
| chr3 | 108197411 | 108197411 | + | 0          | 0          | -42.21435794 |
| chr3 | 108197412 | 108197412 | - | 0          | 0          | -46.65872955 |
| chr3 | 108197423 | 108197423 | + | 0          | 0          | -56.34682659 |
| chr3 | 108197431 | 108197431 | + | 0          | 0          | -50.76149786 |
| chr3 | 108197435 | 108197435 | + | 0          | 0          | -42.0608193  |

|      |           |           |   |          |            |              |
|------|-----------|-----------|---|----------|------------|--------------|
| chr3 | 108197449 | 108197449 | + | 6.66E-16 | 4.13E-14   | -38.45438552 |
| chr3 | 108197634 | 108197634 | - | 1.96E-11 | 7.91E-10   | -36.84781136 |
| chr3 | 108392621 | 108392621 | + | 1.60E-09 | 5.12E-08   | -42.62605042 |
| chr3 | 108398737 | 108398737 | + | 2.80E-07 | 6.38E-06   | -31.93760263 |
| chr3 | 108713176 | 108713176 | - | 3.60E-14 | 1.91E-12   | -26.31585531 |
| chr3 | 108730437 | 108730437 | + | 0        | 0          | -30.85603194 |
| chr3 | 108730486 | 108730486 | - | 0        | 0          | -34.88842494 |
| chr3 | 108881213 | 108881213 | + | 0        | 0          | -30.7456756  |
| chr3 | 115094891 | 115094891 | - | 4.36E-11 | 1.69E-09   | -29.54610607 |
| chr3 | 116105037 | 116105037 | + | 0        | 0          | -26.77570093 |
| chr3 | 116105072 | 116105072 | + | 0        | 0          | -28.56267507 |
| chr3 | 116105106 | 116105106 | + | 3.70E-06 | 6.76E-05   | -38.0952381  |
| chr3 | 116105338 | 116105338 | - | 2.36E-07 | 5.45E-06   | -38.16091954 |
| chr3 | 121364915 | 121364915 | + | 1.11E-16 | 7.26E-15   | -26.32391714 |
| chr3 | 121481932 | 121481932 | + | 4.63E-09 | 1.40E-07   | -27.51115213 |
| chr3 | 121532042 | 121532042 | - | 1.28E-12 | 5.85E-11   | -29.56754894 |
| chr3 | 121532088 | 121532088 | + | 0        | 0          | -31.58563326 |
| chr3 | 121532089 | 121532089 | - | 5.20E-12 | 2.23E-10   | -27.38933302 |
| chr3 | 121532094 | 121532094 | + | 0        | 0          | -29.76891935 |
| chr3 | 121532128 | 121532128 | + | 0        | 0          | -33.80511899 |
| chr3 | 121723948 | 121723948 | + | 0        | 0          | -32.09299349 |
| chr3 | 121886611 | 121886611 | + | 7.29E-09 | 2.14E-07   | -34.66771138 |
| chr3 | 121900457 | 121900457 | - | 1.43E-07 | 3.42E-06   | -27.88668143 |
| chr3 | 121900461 | 121900461 | - | 4.86E-07 | 1.06E-05   | -27.03896104 |
| chr3 | 122033248 | 122033248 | + | 1.17E-05 | 0.00018989 | -48.86018237 |
| chr3 | 122033439 | 122033439 | - | 1.68E-09 | 5.36E-08   | -27.44840749 |
| chr3 | 122033468 | 122033468 | - | 4.64E-11 | 1.80E-09   | -33.53908244 |
| chr3 | 122043831 | 122043831 | + | 1.11E-15 | 6.76E-14   | -34.03202329 |
| chr3 | 122044010 | 122044010 | + | 0        | 0          | -43.74588972 |
| chr3 | 122044011 | 122044011 | - | 0        | 0          | -46.98233473 |
| chr3 | 122044036 | 122044036 | + | 0        | 0          | -46.73061489 |
| chr3 | 122044118 | 122044118 | + | 0        | 0          | -37.87815432 |
| chr3 | 122044119 | 122044119 | - | 0        | 0          | -41.7042688  |
| chr3 | 122044222 | 122044222 | - | 0        | 0          | -37.01301641 |
| chr3 | 122044242 | 122044242 | + | 0        | 0          | -57.83969577 |
| chr3 | 122044243 | 122044243 | - | 0        | 0          | -49.32556534 |
| chr3 | 122044265 | 122044265 | + | 0        | 0          | -46.51162791 |
| chr3 | 122044270 | 122044270 | + | 0        | 0          | -59.93464052 |
| chr3 | 122044277 | 122044277 | + | 2.70E-13 | 1.32E-11   | -47.90725685 |
| chr3 | 122044453 | 122044453 | - | 5.36E-05 | 0.00073363 | -31.67420814 |
| chr3 | 122044467 | 122044467 | - | 5.36E-05 | 0.00073363 | -31.67420814 |

|      |           |           |   |            |            |              |
|------|-----------|-----------|---|------------|------------|--------------|
| chr3 | 122044478 | 122044478 | - | 1.21E-05   | 0.00019641 | -30.26315789 |
| chr3 | 122044513 | 122044513 | + | 0          | 0          | -31.73583663 |
| chr3 | 122044514 | 122044514 | - | 0          | 0          | -32.91293619 |
| chr3 | 122044528 | 122044528 | - | 0          | 0          | -35.85695007 |
| chr3 | 122048313 | 122048313 | - | 2.59E-10   | 9.19E-09   | -25.45533204 |
| chr3 | 122292567 | 122292567 | + | 4.86E-11   | 1.87E-09   | -25.42253521 |
| chr3 | 122292808 | 122292808 | + | 0          | 0          | -29.00405527 |
| chr3 | 122292829 | 122292829 | + | 0          | 0          | -26.39973815 |
| chr3 | 122316798 | 122316798 | + | 3.77E-09   | 1.15E-07   | -27.95819038 |
| chr3 | 122394178 | 122394178 | + | 7.86E-07   | 1.65E-05   | 34.66666667  |
| chr3 | 122394186 | 122394186 | + | 1.11E-06   | 2.25E-05   | 32.92131845  |
| chr3 | 122420897 | 122420897 | + | 0          | 0          | -28.50539081 |
| chr3 | 122421168 | 122421168 | - | 0          | 0          | -44.81479928 |
| chr3 | 122421185 | 122421185 | + | 7.81E-12   | 3.29E-10   | -67.92540793 |
| chr3 | 122421205 | 122421205 | + | 1.84E-06   | 3.58E-05   | -44.04761905 |
| chr3 | 122432891 | 122432891 | + | 0          | 0          | -25.19286789 |
| chr3 | 122433198 | 122433198 | - | 0          | 0          | -31.13790644 |
| chr3 | 122473939 | 122473939 | - | 0          | 0          | -32.35214515 |
| chr3 | 122473967 | 122473967 | - | 0          | 0          | -26.72378621 |
| chr3 | 122510295 | 122510295 | + | 0          | 0          | -35.571185   |
| chr3 | 122621124 | 122621124 | + | 1.70E-07   | 4.03E-06   | -32.83994795 |
| chr3 | 122638472 | 122638472 | - | 0          | 0          | -26.39573071 |
| chr3 | 123243635 | 123243635 | - | 0.00032441 | 0.00345883 | -29.23076923 |
| chr3 | 126610530 | 126610530 | - | 0          | 0          | -34.97356889 |
| chr3 | 127459066 | 127459066 | + | 2.87E-12   | 1.27E-10   | -26.85245612 |
| chr3 | 127459088 | 127459088 | + | 0          | 0          | -34.27977637 |
| chr3 | 127459125 | 127459125 | - | 0          | 0          | -25.84739535 |
| chr3 | 127695461 | 127695461 | + | 0          | 0          | -44.81432006 |
| chr3 | 127695468 | 127695468 | + | 0          | 0          | -41.69665998 |
| chr3 | 127695469 | 127695469 | - | 0          | 0          | -48.00511014 |
| chr3 | 127695474 | 127695474 | + | 0          | 0          | -33.84680749 |
| chr3 | 127695475 | 127695475 | - | 0          | 0          | -37.99519239 |
| chr3 | 127695478 | 127695478 | + | 0          | 0          | -39.24960556 |
| chr3 | 127695479 | 127695479 | - | 0          | 0          | -44.32178063 |
| chr3 | 127695484 | 127695484 | + | 0          | 0          | -30.14880288 |
| chr3 | 127695485 | 127695485 | - | 0          | 0          | -39.82734947 |
| chr3 | 127695488 | 127695488 | + | 0          | 0          | -42.56245395 |
| chr3 | 127695489 | 127695489 | - | 0          | 0          | -42.68250062 |
| chr3 | 127695505 | 127695505 | + | 0.00012152 | 0.00149188 | -37.90707772 |
| chr3 | 127695506 | 127695506 | - | 0          | 0          | -41.16199924 |
| chr3 | 127695531 | 127695531 | + | 0          | 0          | -38.1506996  |

|      |           |           |   |            |            |              |
|------|-----------|-----------|---|------------|------------|--------------|
| chr3 | 127695534 | 127695534 | + | 0          | 0          | -37.5        |
| chr3 | 127695541 | 127695541 | + | 0          | 0          | -37.44934566 |
| chr3 | 127695571 | 127695571 | + | 0          | 0          | -44.0612273  |
| chr3 | 127695580 | 127695580 | + | 0          | 0          | -41.6443407  |
| chr3 | 127695607 | 127695607 | - | 0          | 0          | -55.85449357 |
| chr3 | 127695639 | 127695639 | - | 0          | 0          | -37.24421557 |
| chr3 | 127695657 | 127695657 | - | 0          | 0          | -45.09944403 |
| chr3 | 127695663 | 127695663 | - | 4.97E-10   | 1.70E-08   | -47.76470588 |
| chr3 | 127695666 | 127695666 | - | 6.64E-07   | 1.41E-05   | -42.40096038 |
| chr3 | 127695683 | 127695683 | - | 1.36E-06   | 2.72E-05   | -41.84981685 |
| chr3 | 128588164 | 128588164 | - | 8.69E-05   | 0.00111606 | 26.38694639  |
| chr3 | 129434225 | 129434225 | + | 1.17E-06   | 2.37E-05   | -26.65930018 |
| chr3 | 129570543 | 129570543 | - | 0          | 0          | -26.63240615 |
| chr3 | 129789164 | 129789164 | - | 0.00015257 | 0.0018161  | -37.71929825 |
| chr3 | 130052545 | 130052545 | + | 0          | 0          | -25.30651341 |
| chr3 | 130073041 | 130073041 | + | 1.73E-05   | 0.00026991 | 25.45940528  |
| chr3 | 131019146 | 131019146 | + | 0          | 0          | -25.69565143 |
| chr3 | 131019253 | 131019253 | + | 4.80E-08   | 1.24E-06   | -26.2987013  |
| chr3 | 131019298 | 131019298 | + | 5.56E-07   | 1.20E-05   | -26.9335512  |
| chr3 | 131102346 | 131102346 | - | 4.43E-08   | 1.15E-06   | -35.8004386  |
| chr3 | 131102352 | 131102352 | - | 1.40E-06   | 2.79E-05   | -32.61452942 |
| chr3 | 131102354 | 131102354 | - | 0.00016423 | 0.00193533 | -25.78828829 |
| chr3 | 131102378 | 131102378 | - | 1.47E-06   | 2.92E-05   | -26.628734   |
| chr3 | 131117930 | 131117930 | + | 0.00014484 | 0.00173677 | -40.04192872 |
| chr3 | 131117955 | 131117955 | + | 0.00035982 | 0.00377439 | -34.17190776 |
| chr3 | 131302475 | 131302475 | - | 5.53E-12   | 2.36E-10   | -31.94039373 |
| chr3 | 133533786 | 133533786 | - | 0          | 0          | -25.72773186 |
| chr3 | 133600603 | 133600603 | + | 0          | 0          | -29.27503163 |
| chr3 | 133600691 | 133600691 | - | 0          | 0          | -29.29292929 |
| chr3 | 133600936 | 133600936 | - | 2.02E-06   | 3.91E-05   | -31.28221913 |
| chr3 | 135511909 | 135511909 | - | 0          | 0          | -25.63187258 |
| chr3 | 135570307 | 135570307 | + | 1.00E-06   | 2.06E-05   | -46.60714286 |
| chr3 | 135653569 | 135653569 | + | 9.97E-14   | 5.08E-12   | -26.37702368 |
| chr3 | 136833655 | 136833655 | + | 0          | 0          | -25.90071537 |
| chr3 | 137548209 | 137548209 | - | 1.60E-09   | 5.12E-08   | -39.391086   |
| chr3 | 137957719 | 137957719 | + | 2.40E-05   | 0.00036147 | -30.10171647 |
| chr3 | 138066508 | 138066508 | - | 0          | 0          | -26.30701347 |
| chr3 | 138066529 | 138066529 | + | 0          | 0          | -25.36198897 |
| chr3 | 138997666 | 138997666 | - | 0          | 0          | 29.41486468  |
| chr3 | 139128581 | 139128581 | - | 0          | 0          | 59.65764515  |
| chr3 | 139671470 | 139671470 | + | 0          | 0          | -27.01162454 |

|      |           |           |   |            |            |              |
|------|-----------|-----------|---|------------|------------|--------------|
| chr3 | 139671527 | 139671527 | - | 0          | 0          | -30.64461166 |
| chr3 | 139821895 | 139821895 | + | 0          | 0          | 49.07455118  |
| chr3 | 144152821 | 144152821 | + | 0.00017001 | 0.0019936  | 44.35483871  |
| chr3 | 144367760 | 144367760 | + | 0          | 0          | -34.03237687 |
| chr3 | 144367761 | 144367761 | - | 0          | 0          | -34.54435661 |
| chr3 | 144367788 | 144367788 | - | 0          | 0          | -25.14316461 |
| chr3 | 144557252 | 144557252 | + | 0          | 0          | -36.07113058 |
| chr3 | 144557253 | 144557253 | - | 2.86E-08   | 7.66E-07   | -26.54862741 |
| chr3 | 144557281 | 144557281 | + | 0          | 0          | -37.32072343 |
| chr3 | 144557282 | 144557282 | - | 0          | 0          | -35.33809216 |
| chr3 | 145703660 | 145703660 | + | 0          | 0          | -26.01510787 |
| chr3 | 145703777 | 145703777 | - | 0          | 0          | -26.77551092 |
| chr3 | 145963156 | 145963156 | + | 0          | 0          | -41.56557728 |
| chr3 | 145963165 | 145963165 | + | 0          | 0          | -48.763947   |
| chr3 | 145963185 | 145963185 | + | 0          | 0          | -36.08580196 |
| chr3 | 145963252 | 145963252 | - | 0          | 0          | -42.12643822 |
| chr3 | 146185208 | 146185208 | + | 2.23E-13   | 1.10E-11   | -29.27212913 |
| chr3 | 146185209 | 146185209 | - | 0          | 0          | -27.85711657 |
| chr3 | 146260462 | 146260462 | - | 8.25E-08   | 2.06E-06   | -26.08187135 |
| chr3 | 146405756 | 146405756 | - | 0          | 0          | -41.37772524 |
| chr3 | 146405773 | 146405773 | - | 1.56E-13   | 7.82E-12   | -33.48765432 |
| chr3 | 146405793 | 146405793 | - | 0          | 0          | -26.95920124 |
| chr3 | 146405845 | 146405845 | + | 0          | 0          | -35.89423198 |
| chr3 | 148680887 | 148680887 | + | 0.00025852 | 0.00285321 | -30.07348785 |
| chr3 | 149001639 | 149001639 | + | 0          | 0          | -26.28476972 |
| chr3 | 149184381 | 149184381 | + | 0          | 0          | -27.22134059 |
| chr3 | 149184424 | 149184424 | + | 0          | 0          | -39.35873829 |
| chr3 | 149184425 | 149184425 | - | 0          | 0          | -33.28801837 |
| chr3 | 149184428 | 149184428 | + | 0          | 0          | -34.35839446 |
| chr3 | 149184429 | 149184429 | - | 0          | 0          | -28.09112946 |
| chr3 | 149184441 | 149184441 | - | 0          | 0          | -34.20729945 |
| chr3 | 151198711 | 151198711 | + | 0          | 0          | -30.59117165 |
| chr3 | 152165368 | 152165368 | - | 0          | 0          | -38.24391686 |
| chr3 | 152165385 | 152165385 | + | 0          | 0          | -31.23380146 |
| chr3 | 152264919 | 152264919 | + | 0          | 0          | -26.32849285 |
| chr3 | 152266563 | 152266563 | - | 0          | 0          | -31.78763441 |
| chr3 | 152266839 | 152266839 | + | 3.33E-16   | 2.11E-14   | -26.48725464 |
| chr3 | 152975278 | 152975278 | - | 5.34E-05   | 0.00073117 | -26.54490107 |
| chr3 | 154192841 | 154192841 | - | 0          | 0          | -25.63266678 |
| chr3 | 154210890 | 154210890 | + | 0.00014367 | 0.00172466 | -25.18518519 |
| chr3 | 157377730 | 157377730 | + | 2.13E-13   | 1.05E-11   | -26.93885859 |

|      |           |           |   |            |            |              |
|------|-----------|-----------|---|------------|------------|--------------|
| chr3 | 158225809 | 158225809 | + | 8.00E-06   | 0.00013537 | 54.54545455  |
| chr3 | 159385328 | 159385328 | + | 2.12E-08   | 5.80E-07   | -28.03492531 |
| chr4 | 3679270   | 3679270   | + | 0          | 0          | -27.09994684 |
| chr4 | 4556487   | 4556487   | - | 5.77E-10   | 1.96E-08   | -31.49027053 |
| chr4 | 7954848   | 7954848   | - | 8.83E-05   | 0.00113198 | 29.04255319  |
| chr4 | 8854163   | 8854163   | + | 0          | 0          | -29.46878307 |
| chr4 | 9082088   | 9082088   | - | 0          | 0          | -26.50052682 |
| chr4 | 9185399   | 9185399   | + | 1.11E-15   | 6.76E-14   | -46.20098039 |
| chr4 | 9185406   | 9185406   | + | 2.22E-16   | 1.43E-14   | -48.79817077 |
| chr4 | 9185418   | 9185418   | + | 0          | 0          | -47.20252167 |
| chr4 | 9185435   | 9185435   | + | 8.52E-13   | 3.96E-11   | -37.77175206 |
| chr4 | 9185728   | 9185728   | - | 0          | 0          | -32.92852186 |
| chr4 | 10385876  | 10385876  | + | 1.36E-05   | 0.00021816 | -26.88311688 |
| chr4 | 11023612  | 11023612  | + | 0.00087508 | 0.00791483 | 25.87379779  |
| chr4 | 11578696  | 11578696  | - | 0          | 0          | -43.46153846 |
| chr4 | 11578707  | 11578707  | - | 0          | 0          | -36.34469697 |
| chr4 | 11765073  | 11765073  | + | 9.45E-10   | 3.13E-08   | -29.8706656  |
| chr4 | 12655596  | 12655596  | + | 0          | 0          | -27.84084484 |
| chr4 | 12655648  | 12655648  | - | 0          | 0          | -29.53426605 |
| chr4 | 12655653  | 12655653  | - | 0          | 0          | -29.36172439 |
| chr4 | 12655676  | 12655676  | - | 0          | 0          | -31.06980094 |
| chr4 | 12690583  | 12690583  | + | 8.06E-05   | 0.00104617 | -37.14285714 |
| chr4 | 13744888  | 13744888  | - | 2.04E-05   | 0.00031252 | -25.42735043 |
| chr4 | 13750949  | 13750949  | + | 0          | 0          | -30.69311274 |
| chr4 | 13751034  | 13751034  | + | 0          | 0          | -25.14208055 |
| chr4 | 13751045  | 13751045  | + | 0          | 0          | -31.38883244 |
| chr4 | 13751094  | 13751094  | - | 0          | 0          | -35.16132331 |
| chr4 | 19872226  | 19872226  | + | 2.66E-06   | 5.02E-05   | -26.73217435 |
| chr4 | 20007081  | 20007081  | + | 6.36E-10   | 2.15E-08   | -50.14992504 |
| chr4 | 20007326  | 20007326  | - | 3.55E-09   | 1.09E-07   | -47.86496758 |
| chr4 | 20024077  | 20024077  | - | 1.55E-06   | 3.07E-05   | -25.304414   |
| chr4 | 31698545  | 31698545  | + | 0          | 0          | -30.22664747 |
| chr4 | 31698616  | 31698616  | - | 0          | 0          | -34.46937407 |
| chr4 | 32191643  | 32191643  | + | 0.0002201  | 0.00248631 | -27.77217742 |
| chr4 | 32242446  | 32242446  | - | 1.27E-06   | 2.56E-05   | -37.87234043 |
| chr4 | 32829400  | 32829400  | - | 3.20E-05   | 0.00046596 | -28.33333333 |
| chr4 | 32847883  | 32847883  | - | 0          | 0          | -29.06223689 |
| chr4 | 32864160  | 32864160  | + | 1.21E-05   | 0.00019607 | -41.83474301 |
| chr4 | 33030326  | 33030326  | + | 3.25E-09   | 1.00E-07   | -32.97777778 |
| chr4 | 33030433  | 33030433  | - | 4.19E-08   | 1.10E-06   | -30.76848626 |
| chr4 | 33030437  | 33030437  | - | 2.88E-07   | 6.56E-06   | -27.99754821 |

|      |          |          |   |            |            |              |
|------|----------|----------|---|------------|------------|--------------|
| chr4 | 33210054 | 33210054 | - | 6.98E-06   | 0.00011986 | -33.82352941 |
| chr4 | 33589486 | 33589486 | - | 0.0001134  | 0.00140472 | -31.81818182 |
| chr4 | 34960948 | 34960948 | + | 0          | 0          | -26.52277954 |
| chr4 | 40472849 | 40472849 | - | 0          | 0          | -26.80633917 |
| chr4 | 40774856 | 40774856 | + | 0          | 0          | -25.56787301 |
| chr4 | 40774857 | 40774857 | - | 0          | 0          | -26.08563862 |
| chr4 | 41095686 | 41095686 | - | 5.17E-09   | 1.55E-07   | -26.37571157 |
| chr4 | 41568414 | 41568414 | + | 0          | 0          | -31.67228916 |
| chr4 | 41568415 | 41568415 | - | 0          | 0          | -28.53702862 |
| chr4 | 41568429 | 41568429 | + | 0          | 0          | -31.53332677 |
| chr4 | 41568451 | 41568451 | + | 0          | 0          | -26.98592177 |
| chr4 | 41598919 | 41598919 | - | 4.57E-13   | 2.18E-11   | -26.80694505 |
| chr4 | 41659708 | 41659708 | + | 0          | 0          | -27.31497702 |
| chr4 | 41661119 | 41661119 | + | 2.68E-07   | 6.13E-06   | -29.55284553 |
| chr4 | 41698417 | 41698417 | + | 5.89E-07   | 1.26E-05   | -28.18459191 |
| chr4 | 41710318 | 41710318 | + | 0.00011327 | 0.00140336 | -30.55198973 |
| chr4 | 41712545 | 41712545 | - | 0          | 0          | -29.09395221 |
| chr4 | 41712590 | 41712590 | - | 0          | 0          | -27.77438999 |
| chr4 | 41712611 | 41712611 | + | 0          | 0          | -25.97503374 |
| chr4 | 41725727 | 41725727 | + | 7.41E-12   | 3.12E-10   | -38.01120448 |
| chr4 | 41727060 | 41727060 | + | 0          | 0          | -25.60796493 |
| chr4 | 42924916 | 42924916 | + | 9.59E-10   | 3.17E-08   | -30.5501449  |
| chr4 | 42925024 | 42925024 | - | 0          | 0          | -26.31306377 |
| chr4 | 42950669 | 42950669 | + | 0          | 0          | -33.77579365 |
| chr4 | 42950711 | 42950711 | - | 0          | 0          | -32.18560175 |
| chr4 | 42950734 | 42950734 | + | 0          | 0          | -28.09879176 |
| chr4 | 42950831 | 42950831 | + | 0.00069495 | 0.00654163 | -32.5        |
| chr4 | 42950832 | 42950832 | - | 0          | 0          | -36.59640314 |
| chr4 | 43406792 | 43406792 | + | 0          | 0          | -32.40042769 |
| chr4 | 43406793 | 43406793 | - | 7.39E-13   | 3.46E-11   | -33.30167845 |
| chr4 | 43406903 | 43406903 | - | 0          | 0          | -31.49509804 |
| chr4 | 43423568 | 43423568 | + | 4.65E-07   | 1.02E-05   | -27.44992773 |
| chr4 | 43425438 | 43425438 | - | 0          | 0          | -29.92212552 |
| chr4 | 43426766 | 43426766 | - | 0          | 0          | -25.73007754 |
| chr4 | 43584782 | 43584782 | - | 0          | 0          | -31.26577595 |
| chr4 | 43632237 | 43632237 | - | 0          | 0          | -40.83217219 |
| chr4 | 43632251 | 43632251 | + | 0          | 0          | -28.7922531  |
| chr4 | 43632261 | 43632261 | + | 0          | 0          | -35.27533896 |
| chr4 | 43632267 | 43632267 | + | 0          | 0          | -28.00137599 |
| chr4 | 43632315 | 43632315 | - | 0          | 0          | -31.50069679 |
| chr4 | 43632356 | 43632356 | + | 0          | 0          | -32.68893483 |



|      |          |          |   |            |            |              |
|------|----------|----------|---|------------|------------|--------------|
| chr4 | 43632357 | 43632357 | - | 0          | 0          | -32.03247722 |
| chr4 | 43632367 | 43632367 | + | 0          | 0          | -35.57754025 |
| chr4 | 43632391 | 43632391 | + | 0          | 0          | -32.80356499 |
| chr4 | 43632400 | 43632400 | + | 0          | 0          | -34.00304414 |
| chr4 | 43632403 | 43632403 | + | 0          | 0          | -25.966539   |
| chr4 | 43632464 | 43632464 | - | 0          | 0          | -28.28371074 |
| chr4 | 43632481 | 43632481 | + | 1.31E-13   | 6.58E-12   | -29.79337152 |
| chr4 | 43632482 | 43632482 | - | 0          | 0          | -25.52887008 |
| chr4 | 43729941 | 43729941 | + | 5.06E-06   | 8.98E-05   | -29.51871658 |
| chr4 | 43895362 | 43895362 | + | 0          | 0          | -31.60515662 |
| chr4 | 43895363 | 43895363 | - | 0          | 0          | -39.56287985 |
| chr4 | 43895408 | 43895408 | - | 0          | 0          | -32.69861646 |
| chr4 | 44982253 | 44982253 | + | 0          | 0          | -33.11096731 |
| chr4 | 45398083 | 45398083 | - | 2.11E-06   | 4.06E-05   | -40.46296296 |
| chr4 | 45491914 | 45491914 | + | 6.59E-05   | 0.00087841 | -26.08097785 |
| chr4 | 45492105 | 45492105 | - | 5.08E-07   | 1.10E-05   | -30.38661009 |
| chr4 | 45654782 | 45654782 | + | 0          | 0          | -32.5274939  |
| chr4 | 45654783 | 45654783 | - | 0          | 0          | -33.70293269 |
| chr4 | 45654784 | 45654784 | + | 0          | 0          | -32.30994645 |
| chr4 | 45654785 | 45654785 | - | 0          | 0          | -35.81651418 |
| chr4 | 45770575 | 45770575 | + | 3.33E-16   | 2.11E-14   | -31.02617962 |
| chr4 | 45770747 | 45770747 | - | 0.00010041 | 0.00126564 | -25.70179475 |
| chr4 | 45844684 | 45844684 | - | 0          | 0          | -33.34524873 |
| chr4 | 45869279 | 45869279 | + | 0          | 0          | -33.34731023 |
| chr4 | 45869305 | 45869305 | + | 0          | 0          | -44.76437656 |
| chr4 | 45869383 | 45869383 | - | 0          | 0          | -25.32895102 |
| chr4 | 45869425 | 45869425 | - | 0          | 0          | -25.6524144  |
| chr4 | 45880584 | 45880584 | + | 2.20E-05   | 0.00033486 | -40.02683363 |
| chr4 | 46032443 | 46032443 | + | 7.64E-11   | 2.88E-09   | -26.43343052 |
| chr4 | 46032444 | 46032444 | - | 0          | 0          | -29.72863178 |
| chr4 | 46032471 | 46032471 | - | 0          | 0          | -26.1908811  |
| chr4 | 46276904 | 46276904 | + | 0          | 0          | -26.9005848  |
| chr4 | 46527405 | 46527405 | + | 2.50E-12   | 1.11E-10   | -28.02191114 |
| chr4 | 46615061 | 46615061 | + | 0          | 0          | -25.60720089 |
| chr4 | 46615151 | 46615151 | - | 0          | 0          | -31.70061845 |
| chr4 | 46615158 | 46615158 | - | 0          | 0          | -27.94787027 |
| chr4 | 46620629 | 46620629 | + | 0          | 0          | -39.63758355 |
| chr4 | 46620639 | 46620639 | + | 0          | 0          | -42.35781842 |
| chr4 | 46620646 | 46620646 | + | 0          | 0          | -41.98874296 |
| chr4 | 46620650 | 46620650 | + | 0          | 0          | -43.26165317 |
| chr4 | 46620652 | 46620652 | + | 0          | 0          | -41.91488078 |

|      |          |          |   |          |          |              |
|------|----------|----------|---|----------|----------|--------------|
| chr4 | 46620693 | 46620693 | - | 0        | 0        | -43.16947593 |
| chr4 | 46620701 | 46620701 | - | 0        | 0        | -41.98056156 |
| chr4 | 46620713 | 46620713 | - | 0        | 0        | -30.16312336 |
| chr4 | 46665908 | 46665908 | + | 0        | 0        | -27.53040838 |
| chr4 | 46665947 | 46665947 | - | 5.14E-06 | 9.10E-05 | -28.92921032 |
| chr4 | 46665981 | 46665981 | - | 1.12E-09 | 3.66E-08 | -40.44952808 |
| chr4 | 46666021 | 46666021 | - | 0        | 0        | -34.47585722 |
| chr4 | 47051750 | 47051750 | + | 0        | 0        | -41.1163779  |
| chr4 | 47051751 | 47051751 | - | 0        | 0        | -34.67421716 |
| chr4 | 47051770 | 47051770 | + | 0        | 0        | -30.53221289 |
| chr4 | 47051771 | 47051771 | - | 0        | 0        | -36.44713479 |
| chr4 | 47201142 | 47201142 | + | 0        | 0        | -28.93441724 |
| chr4 | 47823415 | 47823415 | - | 6.22E-14 | 3.23E-12 | -31.2371134  |
| chr4 | 47823449 | 47823449 | - | 5.21E-14 | 2.73E-12 | -36.59326425 |
| chr4 | 47823457 | 47823457 | - | 4.54E-09 | 1.37E-07 | -25.05329457 |
| chr4 | 48541536 | 48541536 | + | 0        | 0        | -30.52834084 |
| chr4 | 48541579 | 48541579 | - | 4.44E-10 | 1.53E-08 | -29.11931818 |
| chr4 | 48584726 | 48584726 | + | 0        | 0        | -34.98394482 |
| chr4 | 48584727 | 48584727 | - | 0        | 0        | -28.86732808 |
| chr4 | 48586623 | 48586623 | + | 0        | 0        | -26.777337   |
| chr4 | 48586688 | 48586688 | - | 0        | 0        | -38.01447997 |
| chr4 | 48586692 | 48586692 | - | 0        | 0        | -34.95956236 |
| chr4 | 48586706 | 48586706 | - | 0        | 0        | -38.39983041 |
| chr4 | 49480628 | 49480628 | + | 0        | 0        | -37.86231884 |
| chr4 | 49480633 | 49480633 | + | 0        | 0        | -40.44391379 |
| chr4 | 49480703 | 49480703 | - | 0        | 0        | -33.34429825 |
| chr4 | 49480730 | 49480730 | - | 0        | 0        | -26.71078278 |
| chr4 | 49631251 | 49631251 | + | 2.36E-12 | 1.05E-10 | -38.33333333 |
| chr4 | 56262832 | 56262832 | + | 0        | 0        | -26.99711826 |
| chr4 | 56989702 | 56989702 | + | 0        | 0        | -28.94021447 |
| chr4 | 56989722 | 56989722 | + | 0        | 0        | -28.31174422 |
| chr4 | 56989863 | 56989863 | + | 0        | 0        | -27.03475254 |
| chr4 | 56989867 | 56989867 | + | 0        | 0        | -30.88763281 |
| chr4 | 56989868 | 56989868 | - | 0        | 0        | -28.40736295 |
| chr4 | 57225665 | 57225665 | - | 0        | 0        | -37.8392873  |
| chr4 | 57845238 | 57845238 | + | 0        | 0        | -36.35628597 |
| chr4 | 58749251 | 58749251 | + | 1.73E-12 | 7.81E-11 | -28.63185632 |
| chr4 | 59635905 | 59635905 | - | 0        | 0        | -39.57344031 |
| chr4 | 59818963 | 59818963 | - | 2.11E-11 | 8.47E-10 | -33.06168105 |
| chr4 | 59871430 | 59871430 | + | 4.44E-16 | 2.79E-14 | -28.38659744 |
| chr4 | 62607549 | 62607549 | + | 0        | 0        | -25.54284732 |

|      |           |           |   |            |            |              |
|------|-----------|-----------|---|------------|------------|--------------|
| chr4 | 62634675  | 62634675  | - | 0          | 0          | -34.07869384 |
| chr4 | 62694050  | 62694050  | - | 0.00012345 | 0.00151219 | -29.08333333 |
| chr4 | 63405010  | 63405010  | + | 2.13E-06   | 4.10E-05   | -25.38596212 |
| chr4 | 63557036  | 63557036  | + | 0          | 0          | -30.78418427 |
| chr4 | 74954848  | 74954848  | + | 7.04E-05   | 0.00092983 | -40          |
| chr4 | 79322970  | 79322970  | - | 0.00030397 | 0.00327412 | -29.03225806 |
| chr4 | 81177692  | 81177692  | + | 1.95E-11   | 7.87E-10   | -28.89359636 |
| chr4 | 81178106  | 81178106  | - | 4.40E-09   | 1.33E-07   | -25.82449941 |
| chr4 | 81178134  | 81178134  | - | 1.54E-12   | 6.97E-11   | -26.97152075 |
| chr4 | 82467814  | 82467814  | - | 0          | 0          | -33.95291693 |
| chr4 | 82508286  | 82508286  | + | 0          | 0          | -30.63312207 |
| chr4 | 82509894  | 82509894  | + | 0          | 0          | -27.87438127 |
| chr4 | 82537918  | 82537918  | - | 1.50E-09   | 4.84E-08   | -34.55433455 |
| chr4 | 82693054  | 82693054  | + | 0          | 0          | -25.66290879 |
| chr4 | 82705398  | 82705398  | - | 6.51E-10   | 2.20E-08   | -29.22201139 |
| chr4 | 83501228  | 83501228  | + | 8.58E-10   | 2.86E-08   | -34.00124504 |
| chr4 | 89293601  | 89293601  | - | 0          | 0          | -26.96407038 |
| chr4 | 89505554  | 89505554  | + | 0          | 0          | -25.45306571 |
| chr4 | 91381266  | 91381266  | + | 0.00048995 | 0.00489056 | -26.36363636 |
| chr4 | 91595857  | 91595857  | - | 0.00025516 | 0.00282165 | -32.19219219 |
| chr4 | 95154249  | 95154249  | - | 0          | 0          | -25.58690745 |
| chr4 | 95154290  | 95154290  | - | 0          | 0          | -29.09814234 |
| chr4 | 97779168  | 97779168  | - | 1.63E-07   | 3.88E-06   | -30.35087719 |
| chr4 | 97779176  | 97779176  | - | 7.91E-08   | 1.98E-06   | -34.02388951 |
| chr4 | 98778987  | 98778987  | + | 0          | 0          | -25.30264868 |
| chr4 | 98786776  | 98786776  | - | 1.11E-06   | 2.26E-05   | -35.009456   |
| chr4 | 99445525  | 99445525  | + | 2.51E-11   | 1.00E-09   | -26.34771629 |
| chr4 | 99445706  | 99445706  | - | 6.06E-08   | 1.54E-06   | -25.55082356 |
| chr4 | 99655539  | 99655539  | + | 7.09E-08   | 1.79E-06   | -34.52495974 |
| chr4 | 100136981 | 100136981 | + | 1.61E-12   | 7.30E-11   | -26.41500286 |
| chr4 | 102577970 | 102577970 | + | 4.21E-09   | 1.27E-07   | -27.03219902 |
| chr4 | 102589847 | 102589847 | + | 0          | 0          | -31.00044767 |
| chr4 | 102589848 | 102589848 | - | 0          | 0          | -29.45475367 |
| chr4 | 102589880 | 102589880 | + | 0          | 0          | -28.41502499 |
| chr4 | 102589881 | 102589881 | - | 0          | 0          | -26.9926293  |
| chr4 | 102956151 | 102956151 | - | 0          | 0          | -25.74575077 |
| chr4 | 103036207 | 103036207 | - | 0          | 0          | -27.80632218 |
| chr4 | 105129743 | 105129743 | - | 0          | 0          | -35.18733409 |
| chr4 | 105159114 | 105159114 | + | 0          | 0          | -31.57194329 |
| chr4 | 105159129 | 105159129 | + | 0          | 0          | -38.88855379 |
| chr4 | 105348306 | 105348306 | - | 0          | 0          | -25.0706886  |

|      |           |           |   |            |            |              |
|------|-----------|-----------|---|------------|------------|--------------|
| chr4 | 106200073 | 106200073 | + | 0          | 0          | -30.34596525 |
| chr4 | 106245086 | 106245086 | - | 0.00062929 | 0.00602572 | -26.3681592  |
| chr4 | 106328432 | 106328432 | - | 0.00028525 | 0.00310257 | 34.7826087   |
| chr4 | 106506685 | 106506685 | - | 0.00015912 | 0.00188347 | -39.73421927 |
| chr4 | 106788358 | 106788358 | - | 2.70E-05   | 0.00040105 | -36.9924812  |
| chr4 | 106840567 | 106840567 | - | 2.68E-14   | 1.44E-12   | -27.66666667 |
| chr4 | 106856044 | 106856044 | - | 0          | 0          | -41.05958378 |
| chr4 | 106856054 | 106856054 | - | 0          | 0          | -39.91696702 |
| chr4 | 106856063 | 106856063 | - | 0          | 0          | -25.95395929 |
| chr4 | 106856105 | 106856105 | + | 0          | 0          | -32.78922912 |
| chr4 | 106856106 | 106856106 | - | 0          | 0          | -30.04766687 |
| chr4 | 106856148 | 106856148 | - | 0          | 0          | -25.75608588 |
| chr4 | 106947924 | 106947924 | + | 0          | 0          | -28.4721311  |
| chr4 | 106955922 | 106955922 | + | 0          | 0          | -27.86990451 |
| chr4 | 106955975 | 106955975 | - | 0          | 0          | -31.57740033 |
| chr4 | 106980633 | 106980633 | + | 5.94E-06   | 0.00010369 | -37.03429101 |
| chr4 | 106980657 | 106980657 | + | 2.90E-05   | 0.00042665 | -34.48540707 |
| chr4 | 106980659 | 106980659 | + | 5.81E-06   | 0.00010159 | -33.1010453  |
| chr4 | 106980838 | 106980838 | - | 5.77E-12   | 2.46E-10   | -37.32837529 |
| chr4 | 106980878 | 106980878 | - | 5.94E-06   | 0.00010368 | -27.06448789 |
| chr4 | 107126976 | 107126976 | + | 0          | 0          | -35.6135781  |
| chr4 | 107139635 | 107139635 | + | 2.44E-15   | 1.44E-13   | -27.88114041 |
| chr4 | 107139636 | 107139636 | - | 0          | 0          | -32.72250735 |
| chr4 | 107139673 | 107139673 | - | 3.00E-07   | 6.80E-06   | -27.40827024 |
| chr4 | 107139684 | 107139684 | + | 0          | 0          | -31.64309835 |
| chr4 | 107139685 | 107139685 | - | 0          | 0          | -30.46334891 |
| chr4 | 107139710 | 107139710 | - | 0          | 0          | -28.35037809 |
| chr4 | 107139711 | 107139711 | + | 0          | 0          | -28.66602379 |
| chr4 | 107139712 | 107139712 | - | 0          | 0          | -30.57595243 |
| chr4 | 107139717 | 107139717 | - | 0          | 0          | -28.74391181 |
| chr4 | 107139724 | 107139724 | - | 0          | 0          | -27.42278273 |
| chr4 | 107354862 | 107354862 | + | 7.01E-14   | 3.62E-12   | -35.54058162 |
| chr4 | 107354901 | 107354901 | - | 5.11E-15   | 2.94E-13   | -25.36445897 |
| chr4 | 107435811 | 107435811 | - | 0          | 0          | -25.9033958  |
| chr4 | 107757662 | 107757662 | - | 0          | 0          | -34.73487187 |
| chr4 | 107986594 | 107986594 | + | 0.00010382 | 0.00130265 | -28.06161354 |
| chr4 | 108031028 | 108031028 | - | 2.53E-09   | 7.90E-08   | -29.22331537 |
| chr4 | 108032399 | 108032399 | + | 0.00097284 | 0.00863305 | -26.89189189 |
| chr4 | 108407282 | 108407282 | + | 0          | 0          | -37.51860632 |
| chr4 | 108407408 | 108407408 | - | 0          | 0          | -31.4927603  |
| chr4 | 108407439 | 108407439 | - | 0          | 0          | -25.66401813 |

|      |           |           |   |            |            |              |
|------|-----------|-----------|---|------------|------------|--------------|
| chr4 | 109658866 | 109658866 | + | 8.33E-15   | 4.69E-13   | -45.49819928 |
| chr4 | 109658931 | 109658931 | - | 0          | 0          | -39.06288536 |
| chr4 | 109658938 | 109658938 | - | 0          | 0          | -40.62125163 |
| chr4 | 113342084 | 113342084 | - | 1.38E-07   | 3.31E-06   | 51.51515152  |
| chr4 | 114407027 | 114407027 | - | 0          | 0          | -26.8876318  |
| chr4 | 114410698 | 114410698 | - | 0          | 0          | -25.63007388 |
| chr4 | 114478517 | 114478517 | + | 0          | 0          | -25.11917546 |
| chr4 | 114648784 | 114648784 | + | 0          | 0          | -36.53583698 |
| chr4 | 114666326 | 114666326 | - | 1.90E-09   | 6.02E-08   | -29.15711739 |
| chr4 | 114666346 | 114666346 | - | 3.22E-15   | 1.89E-13   | -37.17026961 |
| chr4 | 114666365 | 114666365 | + | 0          | 0          | -52.75442298 |
| chr4 | 114666366 | 114666366 | - | 0          | 0          | -50.23785709 |
| chr4 | 114666397 | 114666397 | + | 0          | 0          | -43.84178834 |
| chr4 | 114666398 | 114666398 | - | 0          | 0          | -44.81817114 |
| chr4 | 114666399 | 114666399 | + | 0          | 0          | -41.86041165 |
| chr4 | 114666400 | 114666400 | - | 0          | 0          | -41.62148338 |
| chr4 | 114666438 | 114666438 | - | 0          | 0          | -25.08421368 |
| chr4 | 114666441 | 114666441 | - | 0          | 0          | -31.27172475 |
| chr4 | 114666599 | 114666599 | + | 0          | 0          | -47.52542855 |
| chr4 | 114666600 | 114666600 | - | 0          | 0          | -48.86944356 |
| chr4 | 114666630 | 114666630 | + | 0          | 0          | -34.43031621 |
| chr4 | 114666760 | 114666760 | + | 0          | 0          | -46.85330347 |
| chr4 | 114666761 | 114666761 | - | 0          | 0          | -39.95583255 |
| chr4 | 114666770 | 114666770 | + | 0          | 0          | -56.08198925 |
| chr4 | 114666771 | 114666771 | - | 0          | 0          | -53.13742437 |
| chr4 | 114666772 | 114666772 | + | 0          | 0          | -47.28501773 |
| chr4 | 114666773 | 114666773 | - | 1.88E-11   | 7.59E-10   | -35.92048401 |
| chr4 | 114666788 | 114666788 | + | 0          | 0          | -47.07438182 |
| chr4 | 114666789 | 114666789 | - | 0          | 0          | -50.08305648 |
| chr4 | 114666794 | 114666794 | + | 0          | 0          | -45.43653779 |
| chr4 | 114666795 | 114666795 | - | 0          | 0          | -51.14899801 |
| chr4 | 114666806 | 114666806 | + | 0          | 0          | -39.91960996 |
| chr4 | 114666807 | 114666807 | - | 0          | 0          | -37.71883289 |
| chr4 | 114666824 | 114666824 | - | 0          | 0          | -55.03234843 |
| chr4 | 114779987 | 114779987 | - | 5.44E-15   | 3.12E-13   | -26.20039209 |
| chr4 | 114843717 | 114843717 | + | 1.52E-08   | 4.25E-07   | -28.87387387 |
| chr4 | 114843937 | 114843937 | - | 6.21E-06   | 0.00010791 | -31.2719027  |
| chr4 | 114862084 | 114862084 | + | 0.00072676 | 0.00678784 | 26.44124169  |
| chr4 | 114907184 | 114907184 | + | 0          | 0          | -39.05832462 |
| chr4 | 114907217 | 114907217 | + | 0          | 0          | -33.0572906  |
| chr4 | 114907223 | 114907223 | + | 0          | 0          | -48.12437392 |

|      |           |           |   |            |            |              |
|------|-----------|-----------|---|------------|------------|--------------|
| chr4 | 114907225 | 114907225 | + | 0          | 0          | -40.83535894 |
| chr4 | 114907230 | 114907230 | + | 0          | 0          | -32.60713338 |
| chr4 | 114907275 | 114907275 | - | 0          | 0          | -35.54253357 |
| chr4 | 114907287 | 114907287 | + | 0          | 0          | -25.03400495 |
| chr4 | 114907340 | 114907340 | + | 0          | 0          | -31.43978047 |
| chr4 | 114912895 | 114912895 | - | 3.27E-10   | 1.14E-08   | -31.86813187 |
| chr4 | 114912909 | 114912909 | - | 3.37E-08   | 8.94E-07   | -29.41787942 |
| chr4 | 115064686 | 115064686 | + | 2.45E-06   | 4.66E-05   | -25.38282613 |
| chr4 | 115064719 | 115064719 | - | 1.14E-10   | 4.22E-09   | -26.1552897  |
| chr4 | 115878219 | 115878219 | + | 0          | 0          | -25.90895625 |
| chr4 | 115904626 | 115904626 | + | 0          | 0          | -28.59575502 |
| chr4 | 115978936 | 115978936 | - | 0.0004175  | 0.00427512 | -32.35294118 |
| chr4 | 116820489 | 116820489 | - | 0          | 0          | -28.70171087 |
| chr4 | 116820570 | 116820570 | + | 0          | 0          | -26.40026226 |
| chr4 | 116820603 | 116820603 | + | 0          | 0          | -29.62940185 |
| chr4 | 116820672 | 116820672 | + | 0          | 0          | -28.9639126  |
| chr4 | 116820673 | 116820673 | - | 0          | 0          | -32.60783774 |
| chr4 | 117002946 | 117002946 | - | 2.95E-08   | 7.90E-07   | -37.59398496 |
| chr4 | 117002955 | 117002955 | - | 4.93E-09   | 1.48E-07   | -32.74511748 |
| chr4 | 117002966 | 117002966 | - | 3.64E-06   | 6.67E-05   | -32.79220779 |
| chr4 | 117122310 | 117122310 | - | 0          | 0          | -28.44976613 |
| chr4 | 117317962 | 117317962 | + | 0          | 0          | -29.84227503 |
| chr4 | 117343003 | 117343003 | - | 9.78E-13   | 4.52E-11   | -26.29843699 |
| chr4 | 117361220 | 117361220 | + | 1.63E-10   | 5.92E-09   | -32.88829152 |
| chr4 | 117373925 | 117373925 | + | 4.44E-06   | 7.98E-05   | -25.77225924 |
| chr4 | 117487912 | 117487912 | - | 5.81E-14   | 3.03E-12   | -29.02575588 |
| chr4 | 117587605 | 117587605 | - | 1.49E-06   | 2.96E-05   | -27.38284143 |
| chr4 | 117834414 | 117834414 | + | 0          | 0          | -30.6612782  |
| chr4 | 117834415 | 117834415 | - | 0          | 0          | -35.33243139 |
| chr4 | 117849355 | 117849355 | + | 0          | 0          | -26.52406417 |
| chr4 | 117868219 | 117868219 | + | 0          | 0          | -29.08896085 |
| chr4 | 117883696 | 117883696 | - | 1.02E-06   | 2.09E-05   | -25.90142483 |
| chr4 | 118064290 | 118064290 | + | 2.02E-13   | 9.97E-12   | -28.04479748 |
| chr4 | 118218664 | 118218664 | - | 0.00021025 | 0.00239129 | -27.65957447 |
| chr4 | 118256305 | 118256305 | - | 0          | 0          | -25.28431466 |
| chr4 | 118265788 | 118265788 | + | 0          | 0          | -28.71836295 |
| chr4 | 118289878 | 118289878 | + | 0          | 0          | -32.15896762 |
| chr4 | 118290133 | 118290133 | + | 3.55E-15   | 2.07E-13   | -33.28720899 |
| chr4 | 118290134 | 118290134 | - | 0          | 0          | -38.12588721 |
| chr4 | 118290146 | 118290146 | + | 0          | 0          | -27.52855139 |
| chr4 | 118290286 | 118290286 | + | 0          | 0          | -34.95797337 |

|      |           |           |   |            |            |              |
|------|-----------|-----------|---|------------|------------|--------------|
| chr4 | 118315452 | 118315452 | + | 3.33E-16   | 2.11E-14   | -28.08291246 |
| chr4 | 118417714 | 118417714 | + | 0          | 0          | -25.51953094 |
| chr4 | 118417751 | 118417751 | + | 0          | 0          | -30.74655484 |
| chr4 | 118417752 | 118417752 | - | 0          | 0          | -29.84335597 |
| chr4 | 118517540 | 118517540 | + | 0.00033293 | 0.00353532 | -36.84754522 |
| chr4 | 118517734 | 118517734 | - | 1.11E-16   | 7.26E-15   | -28.37209302 |
| chr4 | 118744119 | 118744119 | - | 2.09E-14   | 1.13E-12   | -35.3202525  |
| chr4 | 119022317 | 119022317 | + | 9.14E-05   | 0.00116619 | -29.79140667 |
| chr4 | 119022321 | 119022321 | + | 0.00026082 | 0.00287502 | -26.81473456 |
| chr4 | 119022325 | 119022325 | + | 0.00038163 | 0.00396578 | -27.26793249 |
| chr4 | 119022335 | 119022335 | + | 0.0003352  | 0.00355599 | -26.81209206 |
| chr4 | 119022337 | 119022337 | + | 0.00016261 | 0.00191899 | -27.17770035 |
| chr4 | 119028412 | 119028412 | + | 0          | 0          | -35.88907557 |
| chr4 | 119028413 | 119028413 | - | 0          | 0          | -27.60297647 |
| chr4 | 119028424 | 119028424 | + | 0          | 0          | -32.20802828 |
| chr4 | 119045806 | 119045806 | + | 0          | 0          | -26.10299426 |
| chr4 | 119072412 | 119072412 | + | 0          | 0          | -40.18426648 |
| chr4 | 119072658 | 119072658 | + | 3.73E-10   | 1.30E-08   | -51.33333333 |
| chr4 | 119072659 | 119072659 | - | 2.01E-13   | 9.96E-12   | -34.22150139 |
| chr4 | 119072974 | 119072974 | + | 0          | 0          | -42.44116984 |
| chr4 | 119072982 | 119072982 | + | 0          | 0          | -42.07168989 |
| chr4 | 119072983 | 119072983 | - | 0          | 0          | -41.01162916 |
| chr4 | 119072994 | 119072994 | + | 0          | 0          | -54.99431044 |
| chr4 | 119072995 | 119072995 | - | 0          | 0          | -58.51101243 |
| chr4 | 119073002 | 119073002 | - | 0          | 0          | -50.71331522 |
| chr4 | 119073004 | 119073004 | - | 0          | 0          | -52.93771219 |
| chr4 | 119073025 | 119073025 | + | 0          | 0          | -29.55246646 |
| chr4 | 119073026 | 119073026 | - | 0          | 0          | -35.33789035 |
| chr4 | 119073033 | 119073033 | + | 0          | 0          | -27.43797083 |
| chr4 | 119073043 | 119073043 | + | 0          | 0          | -50.82889047 |
| chr4 | 119073052 | 119073052 | + | 0          | 0          | -58.3956419  |
| chr4 | 119073057 | 119073057 | + | 0          | 0          | -31.88607595 |
| chr4 | 119073061 | 119073061 | + | 0          | 0          | -42.90208704 |
| chr4 | 119073085 | 119073085 | - | 0          | 0          | -42.93006848 |
| chr4 | 119073098 | 119073098 | - | 0          | 0          | -31.25492986 |
| chr4 | 119073102 | 119073102 | - | 0          | 0          | -45.53306343 |
| chr4 | 119073116 | 119073116 | + | 0          | 0          | -31.20139049 |
| chr4 | 119073117 | 119073117 | - | 0          | 0          | -38.73421728 |
| chr4 | 119073128 | 119073128 | + | 0          | 0          | -44.37045091 |
| chr4 | 119073199 | 119073199 | - | 0          | 0          | -51.82609793 |
| chr4 | 119073216 | 119073216 | - | 0          | 0          | -49.40205978 |

|      |           |           |   |            |            |              |
|------|-----------|-----------|---|------------|------------|--------------|
| chr4 | 119073248 | 119073248 | + | 0          | 0          | -25.7099224  |
| chr4 | 119073249 | 119073249 | - | 5.55E-16   | 3.46E-14   | -29.96326343 |
| chr4 | 119095174 | 119095174 | + | 0          | 0          | -38.33641005 |
| chr4 | 119095217 | 119095217 | - | 0          | 0          | -36.59093917 |
| chr4 | 119110020 | 119110020 | - | 7.32E-10   | 2.45E-08   | -26.38124169 |
| chr4 | 119257350 | 119257350 | - | 0          | 0          | -28.52497685 |
| chr4 | 119966861 | 119966861 | - | 6.28E-09   | 1.86E-07   | -34.09090909 |
| chr4 | 120120792 | 120120792 | + | 3.66E-06   | 6.70E-05   | -56.0483871  |
| chr4 | 120223192 | 120223192 | - | 0          | 0          | -27.08797032 |
| chr4 | 120267158 | 120267158 | - | 0.00013375 | 0.00162137 | -26.62037037 |
| chr4 | 120267175 | 120267175 | - | 4.89E-05   | 0.00067742 | -27.01298701 |
| chr4 | 120267200 | 120267200 | - | 1.48E-05   | 0.0002343  | -29.08767245 |
| chr4 | 120267202 | 120267202 | - | 1.33E-08   | 3.75E-07   | -36.18233618 |
| chr4 | 120267210 | 120267210 | + | 1.90E-10   | 6.84E-09   | -27.19213411 |
| chr4 | 120267215 | 120267215 | + | 4.05E-13   | 1.94E-11   | -31.99273482 |
| chr4 | 120267222 | 120267222 | + | 7.35E-11   | 2.78E-09   | -28.72340426 |
| chr4 | 120304831 | 120304831 | - | 0          | 0          | -42.88757383 |
| chr4 | 120370105 | 120370105 | + | 1.12E-07   | 2.73E-06   | -32.13532682 |
| chr4 | 120667669 | 120667669 | + | 0          | 0          | -32.7187142  |
| chr4 | 120667670 | 120667670 | - | 7.77E-16   | 4.79E-14   | -35.66864593 |
| chr4 | 120667696 | 120667696 | + | 0          | 0          | -31.87013473 |
| chr4 | 120746787 | 120746787 | + | 0          | 0          | -37.53908177 |
| chr4 | 120746788 | 120746788 | - | 0          | 0          | -25.30428509 |
| chr4 | 120751490 | 120751490 | - | 0          | 0          | -41.18837061 |
| chr4 | 121052558 | 121052558 | - | 0          | 0          | -28.89288982 |
| chr4 | 121355852 | 121355852 | - | 0          | 0          | -31.6299805  |
| chr4 | 121360009 | 121360009 | - | 2.44E-08   | 6.61E-07   | -47.47880411 |
| chr4 | 122955870 | 122955870 | - | 0.00102515 | 0.00901355 | -25.23236741 |
| chr4 | 122981860 | 122981860 | + | 0.00050047 | 0.00497887 | -32.23188406 |
| chr4 | 123105565 | 123105565 | + | 0.00011216 | 0.00139157 | -29.05804658 |
| chr4 | 123201977 | 123201977 | + | 0          | 0          | -30.76734309 |
| chr4 | 123201978 | 123201978 | - | 0          | 0          | -34.26491303 |
| chr4 | 123202021 | 123202021 | + | 0          | 0          | -25.00790317 |
| chr4 | 123202022 | 123202022 | - | 0          | 0          | -25.39656992 |
| chr4 | 123202033 | 123202033 | + | 0          | 0          | -34.7797875  |
| chr4 | 123202034 | 123202034 | - | 0          | 0          | -36.34210836 |
| chr4 | 123239938 | 123239938 | + | 0          | 0          | -32.37514518 |
| chr4 | 123239942 | 123239942 | + | 0          | 0          | -42.57926426 |
| chr4 | 123239965 | 123239965 | + | 0          | 0          | -29.88513514 |
| chr4 | 123240016 | 123240016 | - | 0          | 0          | -28.00197824 |
| chr4 | 123412653 | 123412653 | - | 1.18E-14   | 6.54E-13   | -46.00654664 |



|      |           |           |   |            |            |              |
|------|-----------|-----------|---|------------|------------|--------------|
| chr4 | 123412697 | 123412697 | - | 2.40E-11   | 9.57E-10   | -37.01970443 |
| chr4 | 123527756 | 123527756 | - | 0          | 0          | -25.12446681 |
| chr4 | 123896888 | 123896888 | + | 1.46E-10   | 5.35E-09   | -25.87464838 |
| chr4 | 124108923 | 124108923 | - | 0          | 0          | -37.62333686 |
| chr4 | 124146050 | 124146050 | + | 0          | 0          | -28.50247928 |
| chr4 | 124270231 | 124270231 | - | 4.64E-10   | 1.60E-08   | -27.91682198 |
| chr4 | 124637184 | 124637184 | + | 7.78E-05   | 0.00101396 | -25.64102564 |
| chr4 | 124989959 | 124989959 | + | 0          | 0          | -42.95939585 |
| chr4 | 124989978 | 124989978 | + | 0          | 0          | -40.7211874  |
| chr4 | 124990020 | 124990020 | - | 0          | 0          | -40.52241096 |
| chr4 | 124990067 | 124990067 | + | 0          | 0          | -32.40316267 |
| chr4 | 124990068 | 124990068 | - | 0          | 0          | -25.8901421  |
| chr4 | 124990111 | 124990111 | - | 0          | 0          | -32.80775066 |
| chr4 | 124990156 | 124990156 | + | 0          | 0          | -26.47215391 |
| chr4 | 124991350 | 124991350 | + | 0          | 0          | -26.88412853 |
| chr4 | 125145839 | 125145839 | - | 0.00090033 | 0.00810287 | -27.18145309 |
| chr4 | 125158951 | 125158951 | - | 0          | 0          | -26.17382838 |
| chr4 | 126070122 | 126070122 | + | 0.00043666 | 0.00443885 | -31.03448276 |
| chr4 | 126137887 | 126137887 | - | 0          | 0          | -43.21348457 |
| chr4 | 126147816 | 126147816 | + | 0          | 0          | -51.04805609 |
| chr4 | 126147832 | 126147832 | + | 0          | 0          | -51.69771713 |
| chr4 | 126147848 | 126147848 | + | 0          | 0          | -37.46864969 |
| chr4 | 126147989 | 126147989 | - | 3.08E-14   | 1.64E-12   | -27.71526591 |
| chr4 | 126148008 | 126148008 | - | 0          | 0          | -54.63704316 |
| chr4 | 126148010 | 126148010 | - | 0          | 0          | -38.58037937 |
| chr4 | 126149392 | 126149392 | + | 0          | 0          | -28.28628509 |
| chr4 | 126149399 | 126149399 | + | 0          | 0          | -48.14414414 |
| chr4 | 126149405 | 126149405 | + | 0          | 0          | -37.0566152  |
| chr4 | 126149431 | 126149431 | + | 0          | 0          | -38.44684037 |
| chr4 | 126150462 | 126150462 | + | 0          | 0          | -26.50980963 |
| chr4 | 126150709 | 126150709 | + | 0          | 0          | -35.20919931 |
| chr4 | 126150744 | 126150744 | - | 0          | 0          | -38.7050597  |
| chr4 | 126150758 | 126150758 | - | 0          | 0          | -48.23484759 |
| chr4 | 126150774 | 126150774 | + | 0          | 0          | -37.54048126 |
| chr4 | 126150775 | 126150775 | - | 0          | 0          | -38.28404646 |
| chr4 | 126150810 | 126150810 | + | 0          | 0          | -35.18228307 |
| chr4 | 126150883 | 126150883 | + | 0          | 0          | -27.78389655 |
| chr4 | 126180467 | 126180467 | - | 0          | 0          | -28.28917572 |
| chr4 | 126257775 | 126257775 | + | 0          | 0          | -27.58707488 |
| chr4 | 126257784 | 126257784 | + | 0          | 0          | -37.05970528 |
| chr4 | 126287099 | 126287099 | + | 0          | 0          | -29.59687138 |

|      |           |           |   |            |            |              |
|------|-----------|-----------|---|------------|------------|--------------|
| chr4 | 126287115 | 126287115 | + | 0          | 0          | -29.12561688 |
| chr4 | 126287872 | 126287872 | - | 2.52E-09   | 7.88E-08   | -31.62393162 |
| chr4 | 126287908 | 126287908 | - | 2.12E-09   | 6.69E-08   | -28.75618534 |
| chr4 | 126297675 | 126297675 | + | 2.54E-13   | 1.24E-11   | -26.19364375 |
| chr4 | 126300474 | 126300474 | + | 2.50E-05   | 0.00037479 | -27.30404823 |
| chr4 | 126300682 | 126300682 | - | 6.99E-15   | 3.97E-13   | -25.20879121 |
| chr4 | 126324791 | 126324791 | - | 7.02E-14   | 3.63E-12   | -26.9668474  |
| chr4 | 126324831 | 126324831 | + | 0          | 0          | -26.66184814 |
| chr4 | 126324864 | 126324864 | + | 0          | 0          | -31.53313714 |
| chr4 | 126324922 | 126324922 | - | 0          | 0          | -25.55373181 |
| chr4 | 126325371 | 126325371 | + | 0          | 0          | -29.40236497 |
| chr4 | 126325411 | 126325411 | + | 0          | 0          | -50.07509011 |
| chr4 | 126325549 | 126325549 | - | 1.39E-06   | 2.78E-05   | -31.77326626 |
| chr4 | 127005507 | 127005507 | - | 7.11E-15   | 4.03E-13   | -26.06549284 |
| chr4 | 127258181 | 127258181 | + | 0          | 0          | -27.23549488 |
| chr4 | 127258327 | 127258327 | + | 0          | 0          | -25.2354049  |
| chr4 | 127312780 | 127312780 | - | 5.46E-11   | 2.09E-09   | -30.17399267 |
| chr4 | 127312793 | 127312793 | - | 5.93E-12   | 2.52E-10   | -35.39817738 |
| chr4 | 127989857 | 127989857 | + | 1.07E-08   | 3.06E-07   | -28.10318196 |
| chr4 | 128576217 | 128576217 | + | 0.00036522 | 0.00382193 | 47.5         |
| chr4 | 128712256 | 128712256 | - | 0.00011539 | 0.00142579 | -26.35386523 |
| chr4 | 128844241 | 128844241 | + | 5.94E-07   | 1.28E-05   | -31.20629371 |
| chr4 | 128844242 | 128844242 | - | 0.0001867  | 0.00216079 | -25.36124795 |
| chr4 | 128959872 | 128959872 | + | 0          | 0          | -33.37996489 |
| chr4 | 128960932 | 128960932 | + | 0          | 0          | -25.38023185 |
| chr4 | 128960940 | 128960940 | + | 0          | 0          | -34.43981126 |
| chr4 | 128960941 | 128960941 | - | 0          | 0          | -31.61310917 |
| chr4 | 128960988 | 128960988 | - | 0          | 0          | -29.78362696 |
| chr4 | 129016277 | 129016277 | + | 0          | 0          | -27.49175691 |
| chr4 | 129051603 | 129051603 | + | 0          | 0          | -25.25353244 |
| chr4 | 129051752 | 129051752 | - | 0          | 0          | -27.51244927 |
| chr4 | 129106478 | 129106478 | - | 5.69E-11   | 2.18E-09   | -27.74528915 |
| chr4 | 129227033 | 129227033 | + | 0          | 0          | -43.17008874 |
| chr4 | 129227408 | 129227408 | + | 0          | 0          | -38.8756638  |
| chr4 | 129227572 | 129227572 | - | 0          | 0          | -36.08433735 |
| chr4 | 129227575 | 129227575 | - | 0          | 0          | -26.64599355 |
| chr4 | 129231350 | 129231350 | - | 1.56E-05   | 0.0002462  | -25.2764977  |
| chr4 | 129238762 | 129238762 | + | 0          | 0          | -32.75335522 |
| chr4 | 129242181 | 129242181 | - | 2.12E-10   | 7.61E-09   | -29.92307692 |
| chr4 | 129249383 | 129249383 | - | 0.0002208  | 0.00249294 | -32.94573643 |
| chr4 | 129287916 | 129287916 | - | 3.73E-08   | 9.84E-07   | -35.25974026 |

|      |           |           |   |            |            |              |
|------|-----------|-----------|---|------------|------------|--------------|
| chr4 | 129364166 | 129364166 | + | 1.05E-06   | 2.15E-05   | -35.60962847 |
| chr4 | 129437419 | 129437419 | + | 0.00059222 | 0.00572953 | -28.65079365 |
| chr4 | 129440417 | 129440417 | + | 3.22E-15   | 1.89E-13   | -38.28667548 |
| chr4 | 129491153 | 129491153 | + | 0          | 0          | -25.19452225 |
| chr4 | 129491181 | 129491181 | - | 0          | 0          | -44.04796427 |
| chr4 | 129491190 | 129491190 | - | 0          | 0          | -37.03269595 |
| chr4 | 129491232 | 129491232 | + | 0          | 0          | -35.88519566 |
| chr4 | 129491233 | 129491233 | - | 0          | 0          | -41.23238446 |
| chr4 | 129491234 | 129491234 | + | 0          | 0          | -37.23810503 |
| chr4 | 129491235 | 129491235 | - | 0          | 0          | -33.28437266 |
| chr4 | 129491258 | 129491258 | - | 0          | 0          | -26.24605333 |
| chr4 | 129491266 | 129491266 | + | 0          | 0          | -29.27729458 |
| chr4 | 129491267 | 129491267 | - | 0          | 0          | -36.76705865 |
| chr4 | 129491271 | 129491271 | + | 0          | 0          | -33.78466771 |
| chr4 | 129491272 | 129491272 | - | 0          | 0          | -43.0728502  |
| chr4 | 129491279 | 129491279 | + | 0          | 0          | -36.15840303 |
| chr4 | 129491280 | 129491280 | - | 0          | 0          | -35.96420189 |
| chr4 | 129491292 | 129491292 | + | 0          | 0          | -35.71770142 |
| chr4 | 129491293 | 129491293 | - | 0          | 0          | -42.35976789 |
| chr4 | 129491317 | 129491317 | + | 0          | 0          | -30.43089403 |
| chr4 | 129491318 | 129491318 | - | 0          | 0          | -33.55648805 |
| chr4 | 129491323 | 129491323 | + | 0          | 0          | -34.98022849 |
| chr4 | 129491344 | 129491344 | + | 0          | 0          | -29.09607567 |
| chr4 | 129491356 | 129491356 | + | 0          | 0          | -43.35695361 |
| chr4 | 129491357 | 129491357 | - | 0          | 0          | -48.13480367 |
| chr4 | 129491362 | 129491362 | + | 0          | 0          | -37.46989413 |
| chr4 | 129491363 | 129491363 | - | 0          | 0          | -37.08922493 |
| chr4 | 129491399 | 129491399 | + | 0          | 0          | -39.73223491 |
| chr4 | 129491400 | 129491400 | - | 0          | 0          | -31.91146881 |
| chr4 | 129491505 | 129491505 | + | 0          | 0          | -32.28327818 |
| chr4 | 129491506 | 129491506 | - | 0          | 0          | -30.38752879 |
| chr4 | 129513254 | 129513254 | + | 0          | 0          | -33.16924122 |
| chr4 | 129645378 | 129645378 | + | 0          | 0          | -32.67120281 |
| chr4 | 129645406 | 129645406 | + | 0          | 0          | -44.79532164 |
| chr4 | 129645417 | 129645417 | + | 0          | 0          | -34.81614053 |
| chr4 | 129774786 | 129774786 | - | 6.16E-09   | 1.82E-07   | -37.47091284 |
| chr4 | 129794954 | 129794954 | + | 0          | 0          | -31.54853564 |
| chr4 | 129794955 | 129794955 | - | 0          | 0          | -26.21941225 |
| chr4 | 129794969 | 129794969 | + | 0          | 0          | -25.43814433 |
| chr4 | 129794983 | 129794983 | + | 0          | 0          | -25.87362247 |
| chr4 | 129794984 | 129794984 | - | 0          | 0          | -32.93894233 |

|      |           |           |   |            |            |              |
|------|-----------|-----------|---|------------|------------|--------------|
| chr4 | 129795013 | 129795013 | - | 0          | 0          | -27.45927638 |
| chr4 | 129795392 | 129795392 | + | 0          | 0          | -55.36858974 |
| chr4 | 129817899 | 129817899 | + | 1.87E-05   | 0.00028928 | -29.9689441  |
| chr4 | 129818120 | 129818120 | - | 0.00066744 | 0.00632826 | -37.69230769 |
| chr4 | 129877788 | 129877788 | - | 0          | 0          | -28.75299361 |
| chr4 | 129877792 | 129877792 | - | 0          | 0          | -25.55641822 |
| chr4 | 130002368 | 130002368 | - | 0.00033527 | 0.00355651 | -34.7007722  |
| chr4 | 130005560 | 130005560 | + | 7.72E-07   | 1.62E-05   | -43.58208955 |
| chr4 | 130007700 | 130007700 | - | 0          | 0          | -30.1916221  |
| chr4 | 130037375 | 130037375 | + | 0          | 0          | -42.10277008 |
| chr4 | 130037399 | 130037399 | + | 0          | 0          | -27.35074057 |
| chr4 | 130037401 | 130037401 | + | 0          | 0          | -45.94201401 |
| chr4 | 130037516 | 130037516 | - | 0          | 0          | -37.75515144 |
| chr4 | 130066832 | 130066832 | + | 7.98E-08   | 2.00E-06   | -28.64781202 |
| chr4 | 130067106 | 130067106 | + | 0          | 0          | -31.02372087 |
| chr4 | 130093833 | 130093833 | + | 6.99E-14   | 3.62E-12   | -29.4207454  |
| chr4 | 130101388 | 130101388 | - | 0          | 0          | -26.06731746 |
| chr4 | 130166148 | 130166148 | - | 0.00013398 | 0.00162367 | -25.36630037 |
| chr4 | 130174081 | 130174081 | + | 0          | 0          | -34.86349848 |
| chr4 | 130174090 | 130174090 | + | 0          | 0          | -29.49502863 |
| chr4 | 130174091 | 130174091 | - | 0          | 0          | -29.45557634 |
| chr4 | 130174107 | 130174107 | + | 0          | 0          | -33.91278533 |
| chr4 | 130174108 | 130174108 | - | 0          | 0          | -32.79084757 |
| chr4 | 130174120 | 130174120 | + | 0          | 0          | -36.8889069  |
| chr4 | 130174121 | 130174121 | - | 0          | 0          | -34.50781181 |
| chr4 | 130174133 | 130174133 | - | 0          | 0          | -31.82120637 |
| chr4 | 130174135 | 130174135 | + | 2.10E-05   | 0.00032031 | -29.48717949 |
| chr4 | 130174331 | 130174331 | - | 0          | 0          | -31.90025253 |
| chr4 | 130174356 | 130174356 | - | 0          | 0          | -35.53524153 |
| chr4 | 130252007 | 130252007 | + | 0.00094481 | 0.00842848 | -29.36596218 |
| chr4 | 130797792 | 130797792 | - | 0          | 0          | -34.11156095 |
| chr4 | 130797824 | 130797824 | - | 0          | 0          | -27.65262487 |
| chr4 | 130878361 | 130878361 | - | 5.45E-06   | 9.60E-05   | -34.76190476 |
| chr4 | 130904872 | 130904872 | - | 5.11E-05   | 0.00070296 | -40.99576271 |
| chr4 | 130905184 | 130905184 | + | 1.11E-16   | 7.26E-15   | -31.68009043 |
| chr4 | 131743237 | 131743237 | - | 2.13E-07   | 4.95E-06   | -60.11904762 |
| chr4 | 131743277 | 131743277 | + | 7.65E-12   | 3.22E-10   | -28.33443928 |
| chr4 | 131743301 | 131743301 | - | 0          | 0          | -26.7543451  |
| chr4 | 131743322 | 131743322 | - | 0          | 0          | -30.62362758 |
| chr4 | 131753422 | 131753422 | + | 0.00051449 | 0.0050952  | -26.49122807 |
| chr4 | 131916008 | 131916008 | + | 4.61E-09   | 1.39E-07   | -53.54609929 |

|      |           |           |   |            |            |              |
|------|-----------|-----------|---|------------|------------|--------------|
| chr4 | 131916023 | 131916023 | + | 0.00011922 | 0.0014673  | -34.49387492 |
| chr4 | 131916035 | 131916035 | + | 2.25E-07   | 5.22E-06   | -51.85031185 |
| chr4 | 131916217 | 131916217 | - | 1.27E-12   | 5.81E-11   | -41.46944923 |
| chr4 | 131916245 | 131916245 | - | 0          | 0          | -53.77972065 |
| chr4 | 131919788 | 131919788 | - | 2.48E-09   | 7.75E-08   | -32.82977155 |
| chr4 | 131919827 | 131919827 | + | 0          | 0          | -37.09062366 |
| chr4 | 131919843 | 131919843 | + | 0          | 0          | -33.11830035 |
| chr4 | 131922258 | 131922258 | + | 0          | 0          | -27.6765778  |
| chr4 | 131922382 | 131922382 | - | 0          | 0          | -25.8347721  |
| chr4 | 132513510 | 132513510 | + | 0          | 0          | -58.90062112 |
| chr4 | 132513520 | 132513520 | + | 0          | 0          | -46.47482893 |
| chr4 | 132513556 | 132513556 | + | 0          | 0          | -51.90508021 |
| chr4 | 132513745 | 132513745 | - | 1.94E-06   | 3.77E-05   | -46.77419355 |
| chr4 | 132513793 | 132513793 | - | 0.00046784 | 0.00470488 | -33.53726363 |
| chr4 | 132524353 | 132524353 | + | 0          | 0          | -30.57936663 |
| chr4 | 132524475 | 132524475 | - | 0          | 0          | -31.86438068 |
| chr4 | 132524509 | 132524509 | - | 0          | 0          | -35.35087719 |
| chr4 | 132524523 | 132524523 | - | 0          | 0          | -33.54241077 |
| chr4 | 132545985 | 132545985 | + | 1.61E-12   | 7.30E-11   | -28.1094837  |
| chr4 | 132562851 | 132562851 | + | 1.45E-07   | 3.47E-06   | -37.56319515 |
| chr4 | 132562944 | 132562944 | - | 0          | 0          | -27.22420755 |
| chr4 | 132728472 | 132728472 | - | 0          | 0          | -29.11522634 |
| chr4 | 132874310 | 132874310 | + | 3.07E-08   | 8.19E-07   | -25.33650251 |
| chr4 | 132938638 | 132938638 | - | 1.43E-09   | 4.62E-08   | -33.52380952 |
| chr4 | 132941298 | 132941298 | + | 1.34E-11   | 5.50E-10   | -33.99438399 |
| chr4 | 132941302 | 132941302 | + | 7.21E-08   | 1.82E-06   | -26.31168831 |
| chr4 | 132941397 | 132941397 | - | 0          | 0          | -29.21694469 |
| chr4 | 132941413 | 132941413 | - | 0          | 0          | -27.46541471 |
| chr4 | 132946363 | 132946363 | - | 0          | 0          | -28.73835507 |
| chr4 | 133037626 | 133037626 | - | 0          | 0          | -31.9047619  |
| chr4 | 133049089 | 133049089 | + | 0          | 0          | -30.09233259 |
| chr4 | 133107809 | 133107809 | - | 0          | 0          | -25.20925652 |
| chr4 | 133108097 | 133108097 | + | 7.41E-08   | 1.86E-06   | -30.86124402 |
| chr4 | 133196900 | 133196900 | + | 0          | 0          | -27.37200769 |
| chr4 | 133196901 | 133196901 | - | 0          | 0          | -34.85644258 |
| chr4 | 133197703 | 133197703 | - | 7.77E-16   | 4.79E-14   | -25.72184105 |
| chr4 | 133200293 | 133200293 | - | 8.55E-06   | 0.00014375 | -35.97342872 |
| chr4 | 133200300 | 133200300 | + | 0          | 0          | -26.52945864 |
| chr4 | 133200496 | 133200496 | + | 8.84E-08   | 2.19E-06   | -25.29910269 |
| chr4 | 133220950 | 133220950 | + | 0          | 0          | -25.85868898 |
| chr4 | 133247147 | 133247147 | + | 0          | 0          | -32.00633828 |

|      |           |           |   |          |            |              |
|------|-----------|-----------|---|----------|------------|--------------|
| chr4 | 133247222 | 133247222 | - | 0        | 0          | -35.95015214 |
| chr4 | 133247239 | 133247239 | - | 0        | 0          | -39.31198898 |
| chr4 | 133247250 | 133247250 | - | 0        | 0          | -32.316295   |
| chr4 | 133247450 | 133247450 | - | 0        | 0          | -30.01671811 |
| chr4 | 133250219 | 133250219 | - | 1.00E-10 | 3.74E-09   | -26.51186791 |
| chr4 | 133293765 | 133293765 | - | 8.53E-06 | 0.00014357 | -36.94214876 |
| chr4 | 133297538 | 133297538 | - | 0        | 0          | -28.70722626 |
| chr4 | 133398266 | 133398266 | + | 0        | 0          | -30.20453833 |
| chr4 | 133427548 | 133427548 | - | 0        | 0          | -29.58990014 |
| chr4 | 133518772 | 133518772 | + | 0        | 0          | -26.95170272 |
| chr4 | 133518773 | 133518773 | - | 0        | 0          | -30.76529414 |
| chr4 | 133518816 | 133518816 | - | 0        | 0          | -30.4410095  |
| chr4 | 133518827 | 133518827 | + | 0        | 0          | -35.57225192 |
| chr4 | 133518843 | 133518843 | + | 0        | 0          | -29.37360533 |
| chr4 | 133728645 | 133728645 | + | 0        | 0          | -33.27205882 |
| chr4 | 133728664 | 133728664 | + | 0        | 0          | -36.22038687 |
| chr4 | 133728738 | 133728738 | - | 0        | 0          | -25.4969073  |
| chr4 | 133731827 | 133731827 | + | 1.41E-07 | 3.39E-06   | -41.14285714 |
| chr4 | 133828715 | 133828715 | + | 6.66E-05 | 0.00088588 | -53.84615385 |
| chr4 | 133828716 | 133828716 | - | 0        | 0          | -35.45548042 |
| chr4 | 133828924 | 133828924 | - | 0        | 0          | -33.43060552 |
| chr4 | 133876796 | 133876796 | + | 0        | 0          | -28.00213704 |
| chr4 | 133876797 | 133876797 | - | 0        | 0          | -35.88776511 |
| chr4 | 133876840 | 133876840 | + | 0        | 0          | -32.8347536  |
| chr4 | 133876897 | 133876897 | - | 0        | 0          | -25.56060008 |
| chr4 | 134047861 | 134047861 | + | 5.09E-05 | 0.00070088 | -35.53475936 |
| chr4 | 134057154 | 134057154 | - | 0        | 0          | -30.52020731 |
| chr4 | 134060781 | 134060781 | - | 2.18E-09 | 6.86E-08   | -31.34940302 |
| chr4 | 134060808 | 134060808 | - | 1.68E-06 | 3.30E-05   | -37.96296296 |
| chr4 | 134061632 | 134061632 | - | 0        | 0          | -26.62612275 |
| chr4 | 134065732 | 134065732 | - | 2.60E-06 | 4.92E-05   | -31.02023246 |
| chr4 | 134065760 | 134065760 | - | 1.12E-05 | 0.00018328 | -25.61061947 |
| chr4 | 134081410 | 134081410 | + | 0        | 0          | -29.47049877 |
| chr4 | 134238351 | 134238351 | - | 0        | 0          | -31.33108521 |
| chr4 | 134250578 | 134250578 | + | 1.03E-12 | 4.73E-11   | -25.20302278 |
| chr4 | 134252211 | 134252211 | - | 1.23E-07 | 2.98E-06   | -39.8622342  |
| chr4 | 134315371 | 134315371 | - | 0        | 0          | -26.72668912 |
| chr4 | 134430885 | 134430885 | - | 0        | 0          | -28.00120563 |
| chr4 | 134450219 | 134450219 | + | 0        | 0          | -27.21781277 |
| chr4 | 134450261 | 134450261 | - | 0        | 0          | -25.93857123 |
| chr4 | 134450818 | 134450818 | + | 0        | 0          | -34.25260088 |

|      |           |           |   |            |            |              |
|------|-----------|-----------|---|------------|------------|--------------|
| chr4 | 134450828 | 134450828 | + | 0          | 0          | -37.96945987 |
| chr4 | 134450935 | 134450935 | - | 0          | 0          | -35.98019329 |
| chr4 | 134450973 | 134450973 | + | 0          | 0          | -31.65347761 |
| chr4 | 134451021 | 134451021 | + | 0          | 0          | -27.69864956 |
| chr4 | 134451094 | 134451094 | - | 0          | 0          | -36.40150976 |
| chr4 | 134451106 | 134451106 | - | 0          | 0          | -31.32780083 |
| chr4 | 134453906 | 134453906 | + | 0          | 0          | -25.19356905 |
| chr4 | 134579539 | 134579539 | + | 0          | 0          | -32.54618303 |
| chr4 | 134579576 | 134579576 | - | 0          | 0          | -30.50085899 |
| chr4 | 134768751 | 134768751 | + | 0          | 0          | -32.80985408 |
| chr4 | 134768772 | 134768772 | + | 0          | 0          | -33.67014405 |
| chr4 | 134869379 | 134869379 | - | 3.33E-16   | 2.11E-14   | -26.16350544 |
| chr4 | 134940489 | 134940489 | - | 5.55E-15   | 3.18E-13   | -25.95430622 |
| chr4 | 135068152 | 135068152 | + | 0          | 0          | -25.48237888 |
| chr4 | 135147852 | 135147852 | + | 0          | 0          | -26.69565132 |
| chr4 | 135148755 | 135148755 | + | 9.54E-12   | 3.98E-10   | -26.80652681 |
| chr4 | 135148756 | 135148756 | - | 2.82E-11   | 1.12E-09   | -34.70471135 |
| chr4 | 135154796 | 135154796 | + | 0          | 0          | -28.34772602 |
| chr4 | 135154895 | 135154895 | - | 0          | 0          | -36.32547109 |
| chr4 | 135154940 | 135154940 | - | 0          | 0          | -34.94139731 |
| chr4 | 135155304 | 135155304 | + | 1.13E-14   | 6.30E-13   | -48.42553806 |
| chr4 | 135155313 | 135155313 | + | 1.81E-13   | 8.99E-12   | -44.08555843 |
| chr4 | 135155314 | 135155314 | - | 0          | 0          | -40.55335968 |
| chr4 | 135155323 | 135155323 | + | 0          | 0          | -54.19178869 |
| chr4 | 135155324 | 135155324 | - | 0          | 0          | -51.46245059 |
| chr4 | 135155332 | 135155332 | + | 0          | 0          | -42.05248257 |
| chr4 | 135155333 | 135155333 | - | 7.56E-13   | 3.53E-11   | -37.3015873  |
| chr4 | 135155353 | 135155353 | + | 0          | 0          | -47.94831772 |
| chr4 | 135155363 | 135155363 | + | 0          | 0          | -43.98894452 |
| chr4 | 135155368 | 135155368 | + | 0          | 0          | -39.30704141 |
| chr4 | 135155374 | 135155374 | + | 0          | 0          | -32.00539257 |
| chr4 | 135155499 | 135155499 | - | 9.43E-11   | 3.52E-09   | -43.16770186 |
| chr4 | 135155513 | 135155513 | + | 0          | 0          | -40.92751393 |
| chr4 | 135155514 | 135155514 | - | 2.54E-12   | 1.13E-10   | -46.51029748 |
| chr4 | 135155581 | 135155581 | - | 0          | 0          | -43.28671329 |
| chr4 | 135155591 | 135155591 | - | 0          | 0          | -39.33511825 |
| chr4 | 135155619 | 135155619 | - | 0          | 0          | -30.03234909 |
| chr4 | 135155780 | 135155780 | + | 0          | 0          | -37.54429942 |
| chr4 | 135155811 | 135155811 | + | 0          | 0          | -26.01595985 |
| chr4 | 135155966 | 135155966 | + | 0          | 0          | -35.50724638 |
| chr4 | 135155967 | 135155967 | - | 0.00054332 | 0.00533306 | -34.252386   |

|      |           |           |   |            |            |              |
|------|-----------|-----------|---|------------|------------|--------------|
| chr4 | 135156008 | 135156008 | + | 0          | 0          | -32.27935382 |
| chr4 | 135156190 | 135156190 | + | 5.11E-15   | 2.94E-13   | -36.13675541 |
| chr4 | 135166634 | 135166634 | + | 0          | 0          | -37.95894197 |
| chr4 | 135166652 | 135166652 | + | 0          | 0          | -27.37469993 |
| chr4 | 135166653 | 135166653 | - | 0          | 0          | -33.43810023 |
| chr4 | 135166656 | 135166656 | + | 0          | 0          | -30.94236937 |
| chr4 | 135166657 | 135166657 | - | 0          | 0          | -30.61239039 |
| chr4 | 135166665 | 135166665 | + | 0          | 0          | -40.50953296 |
| chr4 | 135166666 | 135166666 | - | 0          | 0          | -40.21123866 |
| chr4 | 135166672 | 135166672 | - | 0          | 0          | -37.76393443 |
| chr4 | 135168757 | 135168757 | + | 0          | 0          | -35.07226856 |
| chr4 | 135175408 | 135175408 | + | 0          | 0          | -35.1183432  |
| chr4 | 135175450 | 135175450 | + | 0          | 0          | -31.41392522 |
| chr4 | 135175451 | 135175451 | - | 0          | 0          | -38.09026883 |
| chr4 | 135175481 | 135175481 | - | 0          | 0          | -25.17123699 |
| chr4 | 135175489 | 135175489 | + | 0          | 0          | -44.27037722 |
| chr4 | 135175536 | 135175536 | - | 0          | 0          | -27.78830982 |
| chr4 | 135175577 | 135175577 | + | 0          | 0          | -36.55398203 |
| chr4 | 135175578 | 135175578 | - | 0          | 0          | -35.2169468  |
| chr4 | 135175579 | 135175579 | + | 0          | 0          | -37.73900003 |
| chr4 | 135175580 | 135175580 | - | 0          | 0          | -45.2920939  |
| chr4 | 135175599 | 135175599 | - | 0          | 0          | -39.76192453 |
| chr4 | 135175602 | 135175602 | - | 0          | 0          | -38.25783035 |
| chr4 | 135175610 | 135175610 | + | 0          | 0          | -31.1459101  |
| chr4 | 135175611 | 135175611 | - | 0          | 0          | -37.65538283 |
| chr4 | 135175637 | 135175637 | + | 0          | 0          | -32.56833546 |
| chr4 | 135175755 | 135175755 | - | 0          | 0          | -32.58989201 |
| chr4 | 135285815 | 135285815 | - | 0          | 0          | -25.56800872 |
| chr4 | 135285849 | 135285849 | - | 4.44E-16   | 2.79E-14   | -26.43675473 |
| chr4 | 135397415 | 135397415 | + | 0          | 0          | -28.58742596 |
| chr4 | 135397420 | 135397420 | + | 0          | 0          | -26.85477455 |
| chr4 | 135451654 | 135451654 | + | 1.72E-13   | 8.54E-12   | -77.01863354 |
| chr4 | 135451676 | 135451676 | + | 0.00014131 | 0.00170009 | -43.19943622 |
| chr4 | 135495960 | 135495960 | + | 0          | 0          | -27.24307656 |
| chr4 | 135495964 | 135495964 | + | 0          | 0          | -25.14596055 |
| chr4 | 135495965 | 135495965 | - | 1.11E-16   | 7.26E-15   | -25.25922233 |
| chr4 | 135496015 | 135496015 | + | 0          | 0          | -26.99489796 |
| chr4 | 135496044 | 135496044 | + | 0          | 0          | -26.70416499 |
| chr4 | 135496045 | 135496045 | - | 0          | 0          | -25.86920819 |
| chr4 | 135496184 | 135496184 | - | 0          | 0          | -36.23911141 |
| chr4 | 135542475 | 135542475 | + | 0          | 0          | -29.26360091 |



|      |           |           |   |            |            |              |
|------|-----------|-----------|---|------------|------------|--------------|
| chr4 | 135547798 | 135547798 | + | 0          | 0          | -27.01130319 |
| chr4 | 135548380 | 135548380 | + | 0          | 0          | -35.40875064 |
| chr4 | 135548413 | 135548413 | + | 0          | 0          | -34.34181518 |
| chr4 | 135548414 | 135548414 | - | 0          | 0          | -43.44018323 |
| chr4 | 135548438 | 135548438 | - | 0          | 0          | -41.9195842  |
| chr4 | 135567083 | 135567083 | - | 4.55E-15   | 2.63E-13   | -27.05420802 |
| chr4 | 135567086 | 135567086 | + | 0          | 0          | -30.35592811 |
| chr4 | 135567093 | 135567093 | + | 0          | 0          | -34.2082762  |
| chr4 | 135752594 | 135752594 | + | 0.00045932 | 0.00463232 | -37.10801394 |
| chr4 | 135878150 | 135878150 | + | 4.77E-12   | 2.05E-10   | -34.40794702 |
| chr4 | 135878151 | 135878151 | - | 0          | 0          | -46.66080225 |
| chr4 | 136089407 | 136089407 | + | 3.15E-07   | 7.11E-06   | -34.37728938 |
| chr4 | 136089408 | 136089408 | - | 2.74E-09   | 8.52E-08   | -28.98039216 |
| chr4 | 136089454 | 136089454 | - | 5.64E-07   | 1.22E-05   | -30.84470435 |
| chr4 | 136104922 | 136104922 | - | 0.0009299  | 0.00831993 | -27.79591837 |
| chr4 | 136104948 | 136104948 | + | 1.64E-07   | 3.90E-06   | -25.37671657 |
| chr4 | 136104957 | 136104957 | + | 8.28E-09   | 2.40E-07   | -28.57898715 |
| chr4 | 136104958 | 136104958 | - | 0          | 0          | -37.6417496  |
| chr4 | 136104980 | 136104980 | - | 2.22E-16   | 1.43E-14   | -30.04628222 |
| chr4 | 136105102 | 136105102 | - | 0          | 0          | -28.29377876 |
| chr4 | 136105281 | 136105281 | - | 0          | 0          | -28.63898825 |
| chr4 | 136117322 | 136117322 | + | 2.58E-07   | 5.92E-06   | -25.75680272 |
| chr4 | 136146967 | 136146967 | + | 0          | 0          | -35.10066646 |
| chr4 | 136147079 | 136147079 | - | 0          | 0          | -28.08122885 |
| chr4 | 136148642 | 136148642 | - | 0          | 0          | -29.82310853 |
| chr4 | 136148977 | 136148977 | - | 0          | 0          | -28.41267932 |
| chr4 | 136180593 | 136180593 | + | 0.00013693 | 0.0016542  | -25.79051383 |
| chr4 | 136217168 | 136217168 | - | 0          | 0          | -38.30510706 |
| chr4 | 136238312 | 136238312 | + | 1.64E-05   | 0.00025734 | -39.1509434  |
| chr4 | 136309686 | 136309686 | - | 2.44E-06   | 4.64E-05   | -26.19437939 |
| chr4 | 136462101 | 136462101 | - | 0          | 0          | -37.74126    |
| chr4 | 136462109 | 136462109 | - | 0          | 0          | -43.9974364  |
| chr4 | 136462113 | 136462113 | - | 0          | 0          | -37.73396435 |
| chr4 | 136462120 | 136462120 | - | 0          | 0          | -30.51907601 |
| chr4 | 136637290 | 136637290 | - | 0          | 0          | -33.60774818 |
| chr4 | 136755834 | 136755834 | + | 0          | 0          | -27.00059763 |
| chr4 | 136797930 | 136797930 | + | 0          | 0          | -25.24876668 |
| chr4 | 136797931 | 136797931 | - | 0          | 0          | -27.75882988 |
| chr4 | 136829889 | 136829889 | + | 0          | 0          | -44.81151018 |
| chr4 | 136829971 | 136829971 | + | 0          | 0          | -46.29063747 |
| chr4 | 136829972 | 136829972 | - | 0          | 0          | -47.5953879  |

|      |           |           |   |          |            |              |
|------|-----------|-----------|---|----------|------------|--------------|
| chr4 | 136830121 | 136830121 | - | 0        | 0          | -31.48714348 |
| chr4 | 136830129 | 136830129 | + | 0        | 0          | -30.57379612 |
| chr4 | 136830156 | 136830156 | + | 0        | 0          | -26.86836634 |
| chr4 | 136830175 | 136830175 | + | 0        | 0          | -38.93369511 |
| chr4 | 136830219 | 136830219 | - | 0        | 0          | -29.3025146  |
| chr4 | 136830253 | 136830253 | - | 0        | 0          | -40.41728888 |
| chr4 | 136834093 | 136834093 | + | 0        | 0          | -39.79560565 |
| chr4 | 136834103 | 136834103 | + | 0        | 0          | -46.08158005 |
| chr4 | 136834104 | 136834104 | - | 0        | 0          | -47.37233691 |
| chr4 | 136834105 | 136834105 | + | 0        | 0          | -47.20334058 |
| chr4 | 136834106 | 136834106 | - | 0        | 0          | -50.53597444 |
| chr4 | 136834136 | 136834136 | + | 0        | 0          | -27.21217101 |
| chr4 | 136834137 | 136834137 | - | 0        | 0          | -29.37023948 |
| chr4 | 136834146 | 136834146 | + | 0        | 0          | -37.67821577 |
| chr4 | 136834147 | 136834147 | - | 0        | 0          | -43.32320311 |
| chr4 | 136834155 | 136834155 | + | 0        | 0          | -40.95093036 |
| chr4 | 136834179 | 136834179 | + | 0        | 0          | -36.33696536 |
| chr4 | 136834231 | 136834231 | - | 0        | 0          | -31.2758718  |
| chr4 | 136834250 | 136834250 | - | 0        | 0          | -28.51486749 |
| chr4 | 136836824 | 136836824 | + | 4.87E-12 | 2.09E-10   | -30.18469828 |
| chr4 | 136836989 | 136836989 | - | 0        | 0          | -26.02055381 |
| chr4 | 136862081 | 136862081 | + | 0        | 0          | -28.72090858 |
| chr4 | 136862138 | 136862138 | - | 0        | 0          | -42.02561592 |
| chr4 | 136862144 | 136862144 | - | 0        | 0          | -34.92899801 |
| chr4 | 136862147 | 136862147 | + | 0        | 0          | -37.6989188  |
| chr4 | 136862148 | 136862148 | - | 0        | 0          | -39.56521739 |
| chr4 | 136862172 | 136862172 | + | 0        | 0          | -25.93380615 |
| chr4 | 136862185 | 136862185 | + | 0        | 0          | -37.05096074 |
| chr4 | 136862186 | 136862186 | - | 0        | 0          | -33.46273959 |
| chr4 | 136862203 | 136862203 | + | 0        | 0          | -29.1033189  |
| chr4 | 136862204 | 136862204 | - | 0        | 0          | -31.71551566 |
| chr4 | 136862210 | 136862210 | + | 0        | 0          | -32.23244797 |
| chr4 | 136862211 | 136862211 | - | 0        | 0          | -32.68845017 |
| chr4 | 136862242 | 136862242 | - | 0        | 0          | -25.37797509 |
| chr4 | 136886624 | 136886624 | - | 9.98E-10 | 3.29E-08   | -34.61844197 |
| chr4 | 136892416 | 136892416 | - | 2.94E-07 | 6.66E-06   | -32.97812279 |
| chr4 | 137128127 | 137128127 | - | 8.58E-05 | 0.00110359 | -26.08286252 |
| chr4 | 137184570 | 137184570 | - | 0        | 0          | -28.7597194  |
| chr4 | 137184751 | 137184751 | - | 4.44E-10 | 1.53E-08   | -33.94910692 |
| chr4 | 137430725 | 137430725 | - | 4.39E-08 | 1.15E-06   | -39.62910465 |
| chr4 | 137485438 | 137485438 | - | 0        | 0          | -40.58775888 |

|      |           |           |   |            |            |              |
|------|-----------|-----------|---|------------|------------|--------------|
| chr4 | 137485481 | 137485481 | - | 1.63E-09   | 5.22E-08   | -26.95354151 |
| chr4 | 137487808 | 137487808 | - | 0          | 0          | -34.18152154 |
| chr4 | 137490398 | 137490398 | + | 0          | 0          | -25.35471512 |
| chr4 | 137540722 | 137540722 | + | 6.75E-06   | 0.00011635 | -28.07017544 |
| chr4 | 137599850 | 137599850 | - | 0          | 0          | -27.94587169 |
| chr4 | 137723797 | 137723797 | - | 0          | 0          | -31.98675497 |
| chr4 | 137723838 | 137723838 | - | 0          | 0          | -27.75623701 |
| chr4 | 137723869 | 137723869 | + | 0          | 0          | -27.64007359 |
| chr4 | 137723879 | 137723879 | + | 0          | 0          | -25.67847828 |
| chr4 | 137723880 | 137723880 | - | 0          | 0          | -32.76984555 |
| chr4 | 137723883 | 137723883 | + | 0          | 0          | -25.85367304 |
| chr4 | 137723884 | 137723884 | - | 0          | 0          | -31.22487631 |
| chr4 | 137723894 | 137723894 | + | 0          | 0          | -27.09474238 |
| chr4 | 137723895 | 137723895 | - | 0          | 0          | -28.98024142 |
| chr4 | 137723913 | 137723913 | - | 0          | 0          | -25.40903008 |
| chr4 | 137723943 | 137723943 | + | 0          | 0          | -30.37776816 |
| chr4 | 137724098 | 137724098 | - | 0          | 0          | -29.4079831  |
| chr4 | 137724114 | 137724114 | - | 0          | 0          | -25.4271659  |
| chr4 | 137800573 | 137800573 | - | 5.66E-15   | 3.24E-13   | -26.56660959 |
| chr4 | 137835428 | 137835428 | + | 1.19E-07   | 2.89E-06   | -31.92156863 |
| chr4 | 137835458 | 137835458 | + | 2.74E-07   | 6.26E-06   | -35.68627451 |
| chr4 | 137855961 | 137855961 | - | 0          | 0          | -33.68416659 |
| chr4 | 137866225 | 137866225 | - | 0          | 0          | -25.73071456 |
| chr4 | 137866493 | 137866493 | - | 0.00013558 | 0.00164017 | -52.07373272 |
| chr4 | 137875926 | 137875926 | + | 0.00116182 | 0.00997851 | -28.45777234 |
| chr4 | 137899127 | 137899127 | + | 0          | 0          | -26.14528309 |
| chr4 | 137899128 | 137899128 | - | 0          | 0          | -28.68322311 |
| chr4 | 137899149 | 137899149 | + | 0          | 0          | -33.32117807 |
| chr4 | 137899150 | 137899150 | - | 0          | 0          | -38.04002219 |
| chr4 | 137899157 | 137899157 | + | 0          | 0          | -29.0627152  |
| chr4 | 137899158 | 137899158 | - | 0          | 0          | -29.74570075 |
| chr4 | 137899167 | 137899167 | - | 0          | 0          | -27.14741399 |
| chr4 | 137914152 | 137914152 | - | 3.91E-10   | 1.36E-08   | -49.22839506 |
| chr4 | 137920764 | 137920764 | + | 0          | 0          | -34.09523441 |
| chr4 | 137920788 | 137920788 | + | 0          | 0          | -31.25269978 |
| chr4 | 137920848 | 137920848 | - | 0          | 0          | -33.87850023 |
| chr4 | 138411206 | 138411206 | - | 7.07E-05   | 0.00093399 | -28.66688941 |
| chr4 | 138411252 | 138411252 | - | 6.83E-05   | 0.00090592 | -30.3030303  |
| chr4 | 138415156 | 138415156 | + | 8.87E-09   | 2.56E-07   | -29.85347985 |
| chr4 | 138415172 | 138415172 | + | 5.16E-09   | 1.55E-07   | -30.23580423 |
| chr4 | 138522527 | 138522527 | - | 5.62E-08   | 1.44E-06   | -28.96956796 |

|      |           |           |   |            |            |              |
|------|-----------|-----------|---|------------|------------|--------------|
| chr4 | 138522559 | 138522559 | - | 4.47E-08   | 1.16E-06   | -30.26259814 |
| chr4 | 138827608 | 138827608 | + | 5.46E-10   | 1.86E-08   | -31.00047813 |
| chr4 | 139143158 | 139143158 | - | 3.55E-15   | 2.07E-13   | -28.54028239 |
| chr4 | 139143407 | 139143407 | - | 2.79E-12   | 1.23E-10   | -55.66991694 |
| chr4 | 139143434 | 139143434 | - | 0.00016157 | 0.00190828 | -31.25608569 |
| chr4 | 139470506 | 139470506 | + | 3.75E-12   | 1.63E-10   | -25.11320755 |
| chr4 | 139556206 | 139556206 | - | 4.04E-12   | 1.75E-10   | -26.0620915  |
| chr4 | 139581683 | 139581683 | + | 0          | 0          | -39.82493557 |
| chr4 | 139641351 | 139641351 | - | 0          | 0          | -33.09079947 |
| chr4 | 139757123 | 139757123 | - | 0          | 0          | -27.98993737 |
| chr4 | 139757279 | 139757279 | - | 0          | 0          | -32.86319376 |
| chr4 | 139818225 | 139818225 | - | 0          | 0          | -29.95960942 |
| chr4 | 139818239 | 139818239 | - | 0          | 0          | -30.4220817  |
| chr4 | 139977531 | 139977531 | - | 8.60E-05   | 0.00110592 | -30.24400685 |
| chr4 | 139993548 | 139993548 | + | 2.88E-07   | 6.56E-06   | -50          |
| chr4 | 140540859 | 140540859 | - | 1.11E-16   | 7.26E-15   | -28.05041237 |
| chr4 | 140542109 | 140542109 | + | 0          | 0          | -31.63031524 |
| chr4 | 140648976 | 140648976 | - | 3.33E-16   | 2.11E-14   | -38.77691054 |
| chr4 | 140665951 | 140665951 | - | 0          | 0          | -31.93324409 |
| chr4 | 140665981 | 140665981 | + | 0          | 0          | -31.45240993 |
| chr4 | 140665987 | 140665987 | + | 0          | 0          | -43.66569207 |
| chr4 | 140666004 | 140666004 | + | 0          | 0          | -31.07876373 |
| chr4 | 140666105 | 140666105 | + | 0          | 0          | -29.93348675 |
| chr4 | 140666106 | 140666106 | - | 0          | 0          | -30.19996466 |
| chr4 | 140703303 | 140703303 | - | 6.03E-10   | 2.04E-08   | -25.56314402 |
| chr4 | 140703868 | 140703868 | + | 8.28E-07   | 1.73E-05   | -54.16666667 |
| chr4 | 140750298 | 140750298 | + | 0          | 0          | -33.85955978 |
| chr4 | 140750337 | 140750337 | + | 0          | 0          | -30.67226891 |
| chr4 | 140750445 | 140750445 | - | 0          | 0          | -35.30371086 |
| chr4 | 140750481 | 140750481 | - | 0          | 0          | -28.85697809 |
| chr4 | 140750721 | 140750721 | + | 0          | 0          | -27.50738874 |
| chr4 | 140750764 | 140750764 | + | 0          | 0          | -30.79615709 |
| chr4 | 140750765 | 140750765 | - | 0          | 0          | -30.66213706 |
| chr4 | 140750798 | 140750798 | - | 0          | 0          | -25.30212901 |
| chr4 | 140763406 | 140763406 | + | 0          | 0          | -26.56956104 |
| chr4 | 140763472 | 140763472 | - | 1.11E-16   | 7.26E-15   | -25.67903489 |
| chr4 | 140770627 | 140770627 | + | 8.98E-05   | 0.00114837 | -32.55813953 |
| chr4 | 140770667 | 140770667 | + | 0.00064577 | 0.00615756 | -25.58139535 |
| chr4 | 140770674 | 140770674 | + | 0.00017558 | 0.00204981 | -30.23255814 |
| chr4 | 140771338 | 140771338 | + | 5.89E-05   | 0.00079594 | -36.36363636 |
| chr4 | 140791176 | 140791176 | - | 0.00035584 | 0.0037395  | -32.95454545 |

|      |           |           |   |          |          |              |
|------|-----------|-----------|---|----------|----------|--------------|
| chr4 | 140791306 | 140791306 | + | 0        | 0        | -26.68458048 |
| chr4 | 140825947 | 140825947 | + | 0        | 0        | -32.61481258 |
| chr4 | 140858048 | 140858048 | - | 1.02E-12 | 4.70E-11 | -33.95732353 |
| chr4 | 140858072 | 140858072 | - | 4.00E-10 | 1.39E-08 | -31.85992619 |
| chr4 | 140869074 | 140869074 | + | 0        | 0        | -40.74137119 |
| chr4 | 140869077 | 140869077 | + | 0        | 0        | -40.6852616  |
| chr4 | 140869154 | 140869154 | + | 0        | 0        | -25.67593612 |
| chr4 | 140869155 | 140869155 | - | 7.22E-15 | 4.09E-13 | -27.49614554 |
| chr4 | 140869232 | 140869232 | - | 0        | 0        | -35.58421096 |
| chr4 | 140869238 | 140869238 | - | 0        | 0        | -42.5061082  |
| chr4 | 140869240 | 140869240 | - | 0        | 0        | -44.42678989 |
| chr4 | 140869244 | 140869244 | - | 0        | 0        | -38.5065231  |
| chr4 | 140869246 | 140869246 | - | 0        | 0        | -35.71523344 |
| chr4 | 140869262 | 140869262 | - | 3.33E-16 | 2.11E-14 | -28.9010989  |
| chr4 | 140869267 | 140869267 | - | 0        | 0        | -37.95807978 |
| chr4 | 140869273 | 140869273 | - | 0        | 0        | -42.30503796 |
| chr4 | 140869275 | 140869275 | - | 0        | 0        | -46.46469496 |
| chr4 | 140869279 | 140869279 | - | 0        | 0        | -37.8320235  |
| chr4 | 140869297 | 140869297 | - | 9.99E-15 | 5.59E-13 | -26.00813008 |
| chr4 | 140869301 | 140869301 | + | 0        | 0        | -30.7199211  |
| chr4 | 140869309 | 140869309 | + | 0        | 0        | -27.48490271 |
| chr4 | 140869313 | 140869313 | + | 0        | 0        | -37.69028168 |
| chr4 | 140869315 | 140869315 | + | 0        | 0        | -31.94236754 |
| chr4 | 140869368 | 140869368 | - | 0        | 0        | -40.30156969 |
| chr4 | 140869374 | 140869374 | - | 0        | 0        | -40.841569   |
| chr4 | 140869386 | 140869386 | - | 0        | 0        | -35.45146678 |
| chr4 | 140921893 | 140921893 | - | 1.06E-08 | 3.03E-07 | -26.49401726 |
| chr4 | 140971948 | 140971948 | + | 0        | 0        | -26.49584025 |
| chr4 | 140971962 | 140971962 | + | 0        | 0        | -26.76919825 |
| chr4 | 141011110 | 141011110 | - | 0        | 0        | -25.92145949 |
| chr4 | 141011327 | 141011327 | - | 4.41E-14 | 2.32E-12 | -28.96926338 |
| chr4 | 141011437 | 141011437 | - | 0        | 0        | -31.29032258 |
| chr4 | 141218633 | 141218633 | + | 0        | 0        | -38.70117422 |
| chr4 | 141218651 | 141218651 | + | 1.86E-12 | 8.38E-11 | -27.52948201 |
| chr4 | 141242790 | 141242790 | + | 1.06E-09 | 3.49E-08 | -28.10350076 |
| chr4 | 141274871 | 141274871 | + | 0        | 0        | -34.14318149 |
| chr4 | 141274874 | 141274874 | + | 0        | 0        | -37.52302864 |
| chr4 | 141274898 | 141274898 | + | 0        | 0        | -35.51273783 |
| chr4 | 141274905 | 141274905 | + | 0        | 0        | -33.85359529 |
| chr4 | 141285326 | 141285326 | + | 0        | 0        | -31.76783398 |
| chr4 | 141285389 | 141285389 | - | 0        | 0        | -30.24786214 |

|      |           |           |   |          |            |              |
|------|-----------|-----------|---|----------|------------|--------------|
| chr4 | 141287893 | 141287893 | + | 1.89E-15 | 1.13E-13   | -30.40427155 |
| chr4 | 141287922 | 141287922 | + | 3.33E-16 | 2.11E-14   | -37.20841785 |
| chr4 | 141293065 | 141293065 | - | 1.53E-10 | 5.56E-09   | -25.33821029 |
| chr4 | 141295827 | 141295827 | - | 4.93E-06 | 8.76E-05   | -35.49407115 |
| chr4 | 141295863 | 141295863 | + | 0        | 0          | -27.36846638 |
| chr4 | 141295864 | 141295864 | - | 9.92E-05 | 0.00125304 | -30.43478261 |
| chr4 | 141295997 | 141295997 | - | 0        | 0          | -32.68229167 |
| chr4 | 141296311 | 141296311 | + | 2.27E-09 | 7.15E-08   | -43.06818182 |
| chr4 | 141310540 | 141310540 | + | 3.00E-15 | 1.76E-13   | -40.80653432 |
| chr4 | 141312435 | 141312435 | + | 0        | 0          | -29.87438892 |
| chr4 | 141312559 | 141312559 | + | 0        | 0          | -29.57413146 |
| chr4 | 141312560 | 141312560 | - | 0        | 0          | -33.61684247 |
| chr4 | 141312578 | 141312578 | + | 0        | 0          | -27.8368689  |
| chr4 | 141312582 | 141312582 | + | 0        | 0          | -29.81081612 |
| chr4 | 141312659 | 141312659 | - | 0        | 0          | -42.82672283 |
| chr4 | 141312682 | 141312682 | - | 5.45E-13 | 2.58E-11   | -35.36742389 |
| chr4 | 141312701 | 141312701 | - | 2.93E-14 | 1.57E-12   | -37.45547074 |
| chr4 | 141368680 | 141368680 | - | 0        | 0          | -28.29932448 |
| chr4 | 141420724 | 141420724 | + | 1.67E-15 | 9.99E-14   | -29.05344203 |
| chr4 | 141565462 | 141565462 | - | 6.56E-12 | 2.78E-10   | -50.65789474 |
| chr4 | 141565499 | 141565499 | + | 9.44E-06 | 0.00015718 | -39.06882591 |
| chr4 | 141565500 | 141565500 | - | 3.86E-08 | 1.02E-06   | -42.04812207 |
| chr4 | 141565508 | 141565508 | + | 2.51E-08 | 6.80E-07   | -43.20175439 |
| chr4 | 141565509 | 141565509 | - | 5.02E-05 | 0.00069202 | -35.99033816 |
| chr4 | 141565518 | 141565518 | + | 1.80E-07 | 4.25E-06   | -41.5075121  |
| chr4 | 141565519 | 141565519 | - | 5.33E-09 | 1.59E-07   | -51.62855163 |
| chr4 | 141625313 | 141625313 | + | 2.85E-09 | 8.84E-08   | -29.74137931 |
| chr4 | 141871109 | 141871109 | + | 0        | 0          | -38.80455408 |
| chr4 | 141871154 | 141871154 | + | 0        | 0          | -41.36929653 |
| chr4 | 141871223 | 141871223 | + | 2.44E-15 | 1.44E-13   | -39.76464389 |
| chr4 | 141871224 | 141871224 | - | 0        | 0          | -49.44495413 |
| chr4 | 141871259 | 141871259 | + | 2.22E-16 | 1.43E-14   | -42.10204082 |
| chr4 | 141872020 | 141872020 | + | 0        | 0          | -33.80602456 |
| chr4 | 141872147 | 141872147 | - | 0        | 0          | -27.95699084 |
| chr4 | 141882604 | 141882604 | + | 1.97E-10 | 7.09E-09   | -27.58467297 |
| chr4 | 142018227 | 142018227 | + | 9.36E-11 | 3.49E-09   | -25.34462604 |
| chr4 | 142070988 | 142070988 | + | 0        | 0          | -26.58839058 |
| chr4 | 142071020 | 142071020 | + | 0        | 0          | -34.24963631 |
| chr4 | 142071024 | 142071024 | + | 0        | 0          | -33.11148684 |
| chr4 | 142071925 | 142071925 | + | 9.20E-13 | 4.26E-11   | -34.88309231 |
| chr4 | 142072075 | 142072075 | - | 0        | 0          | -28.96334898 |

|      |           |           |   |            |            |              |
|------|-----------|-----------|---|------------|------------|--------------|
| chr4 | 142072205 | 142072205 | - | 0          | 0          | -33.50770978 |
| chr4 | 142081993 | 142081993 | + | 0          | 0          | -29.02097625 |
| chr4 | 142082005 | 142082005 | + | 0          | 0          | -31.46788337 |
| chr4 | 142082006 | 142082006 | - | 0          | 0          | -26.92278421 |
| chr4 | 142082024 | 142082024 | + | 0          | 0          | -35.54730389 |
| chr4 | 142082025 | 142082025 | - | 0          | 0          | -30.90108401 |
| chr4 | 142082037 | 142082037 | - | 0          | 0          | -27.84588552 |
| chr4 | 142085268 | 142085268 | - | 1.97E-08   | 5.42E-07   | -40.69767442 |
| chr4 | 142085273 | 142085273 | - | 6.02E-09   | 1.78E-07   | -47.5711575  |
| chr4 | 142085298 | 142085298 | - | 8.55E-15   | 4.81E-13   | -57.08927232 |
| chr4 | 142085315 | 142085315 | - | 1.95E-08   | 5.36E-07   | -30.58324105 |
| chr4 | 142085335 | 142085335 | + | 0          | 0          | -44.26617916 |
| chr4 | 142085336 | 142085336 | - | 0          | 0          | -47.12149976 |
| chr4 | 142085340 | 142085340 | + | 0          | 0          | -44.81531332 |
| chr4 | 142085341 | 142085341 | - | 0          | 0          | -48.5984116  |
| chr4 | 142085345 | 142085345 | + | 0          | 0          | -43.38256709 |
| chr4 | 142085346 | 142085346 | - | 0          | 0          | -45.02505883 |
| chr4 | 142085350 | 142085350 | + | 0          | 0          | -52.35140397 |
| chr4 | 142085351 | 142085351 | - | 0          | 0          | -43.72194661 |
| chr4 | 142085385 | 142085385 | - | 0          | 0          | -38.46290048 |
| chr4 | 142085394 | 142085394 | + | 0          | 0          | -31.26523784 |
| chr4 | 142085490 | 142085490 | + | 5.66E-05   | 0.00076886 | -32.90598291 |
| chr4 | 142085491 | 142085491 | - | 0          | 0          | -29.87753983 |
| chr4 | 142085520 | 142085520 | + | 5.67E-06   | 9.95E-05   | -30.29411765 |
| chr4 | 142171663 | 142171663 | + | 0          | 0          | -26.15381159 |
| chr4 | 142212703 | 142212703 | - | 2.13E-05   | 0.00032474 | 26.92307692  |
| chr4 | 143260393 | 143260393 | + | 1.47E-08   | 4.13E-07   | -27.07760044 |
| chr4 | 143394799 | 143394799 | - | 1.13E-09   | 3.70E-08   | -30.87121212 |
| chr4 | 144404042 | 144404042 | - | 1.39E-06   | 2.77E-05   | -30.76923077 |
| chr4 | 144404054 | 144404054 | - | 0.00010205 | 0.0012834  | -33.33333333 |
| chr4 | 144586524 | 144586524 | - | 1.90E-06   | 3.69E-05   | 33.98883869  |
| chr4 | 144586569 | 144586569 | - | 3.23E-06   | 5.99E-05   | 37.05882353  |
| chr4 | 144984307 | 144984307 | + | 0.00076543 | 0.0070871  | -29.23444976 |
| chr4 | 144984332 | 144984332 | - | 0.00105723 | 0.00924122 | -36.44501279 |
| chr4 | 147928410 | 147928410 | - | 0          | 0          | -37.07218108 |
| chr4 | 148040269 | 148040269 | - | 1.50E-13   | 7.51E-12   | -25.48245024 |
| chr4 | 148062465 | 148062465 | - | 1.14E-10   | 4.21E-09   | -26.35710094 |
| chr4 | 148107730 | 148107730 | + | 0          | 0          | -28.24937872 |
| chr4 | 148107832 | 148107832 | + | 0          | 0          | -41.38362521 |
| chr4 | 148107978 | 148107978 | - | 5.36E-12   | 2.29E-10   | -29.07419922 |
| chr4 | 148107980 | 148107980 | - | 0          | 0          | -43.92207596 |

|      |           |           |   |          |            |              |
|------|-----------|-----------|---|----------|------------|--------------|
| chr4 | 148108175 | 148108175 | + | 0        | 0          | -27.2422204  |
| chr4 | 148108176 | 148108176 | - | 0        | 0          | -32.556552   |
| chr4 | 148115879 | 148115879 | - | 0        | 0          | -26.37360355 |
| chr4 | 148141321 | 148141321 | - | 8.12E-05 | 0.00105258 | -33.39699212 |
| chr4 | 148149371 | 148149371 | + | 0        | 0          | -27.50493858 |
| chr4 | 148149389 | 148149389 | + | 0        | 0          | -39.63576095 |
| chr4 | 148149396 | 148149396 | + | 0        | 0          | -26.51097923 |
| chr4 | 148149452 | 148149452 | - | 0        | 0          | -34.55414678 |
| chr4 | 148149458 | 148149458 | - | 0        | 0          | -31.19874159 |
| chr4 | 148149462 | 148149462 | + | 0        | 0          | -25.2485032  |
| chr4 | 148149463 | 148149463 | - | 0        | 0          | -29.70349444 |
| chr4 | 148149578 | 148149578 | + | 0        | 0          | -29.33153239 |
| chr4 | 148149622 | 148149622 | + | 0        | 0          | -30.64763746 |
| chr4 | 148149744 | 148149744 | - | 4.88E-15 | 2.82E-13   | -30.3394386  |
| chr4 | 148149761 | 148149761 | + | 0        | 0          | -25.27831811 |
| chr4 | 148149762 | 148149762 | - | 1.55E-15 | 9.35E-14   | -32.45980707 |
| chr4 | 148149780 | 148149780 | + | 0        | 0          | -35.59766356 |
| chr4 | 148149781 | 148149781 | - | 0        | 0          | -31.54516142 |
| chr4 | 148149823 | 148149823 | - | 0        | 0          | -25.01031977 |
| chr4 | 148159032 | 148159032 | + | 0        | 0          | -27.4122807  |
| chr4 | 148159103 | 148159103 | + | 0        | 0          | -26.8619136  |
| chr4 | 148676197 | 148676197 | + | 2.30E-06 | 4.41E-05   | -26.1932167  |
| chr4 | 148724517 | 148724517 | + | 0        | 0          | -28.04140947 |
| chr4 | 148739243 | 148739243 | + | 0        | 0          | -31.2003892  |
| chr4 | 148743288 | 148743288 | - | 4.44E-16 | 2.79E-14   | -25.61514821 |
| chr4 | 148743303 | 148743303 | - | 0        | 0          | -25.99492122 |
| chr4 | 148743561 | 148743561 | + | 7.15E-07 | 1.51E-05   | -25.92155408 |
| chr4 | 148743707 | 148743707 | - | 3.63E-07 | 8.11E-06   | -25.69857629 |
| chr4 | 148771341 | 148771341 | - | 0        | 0          | -34.19139951 |
| chr4 | 148799311 | 148799311 | + | 3.59E-08 | 9.49E-07   | -32.20290681 |
| chr4 | 148810099 | 148810099 | - | 9.99E-15 | 5.59E-13   | -26.11832612 |
| chr4 | 148816672 | 148816672 | + | 3.17E-12 | 1.39E-10   | -26.19553308 |
| chr4 | 148881477 | 148881477 | + | 0        | 0          | -25.37372362 |
| chr4 | 148882511 | 148882511 | - | 0        | 0          | -28.65013774 |
| chr4 | 148882537 | 148882537 | - | 0        | 0          | -27.10523959 |
| chr4 | 148882540 | 148882540 | + | 0        | 0          | -30.52223888 |
| chr4 | 148882541 | 148882541 | - | 0        | 0          | -31.32701841 |
| chr4 | 148882548 | 148882548 | - | 0        | 0          | -29.10940803 |
| chr4 | 148888487 | 148888487 | - | 0        | 0          | -25.02305289 |
| chr4 | 148891704 | 148891704 | - | 2.75E-12 | 1.21E-10   | -26.98356689 |
| chr4 | 148922073 | 148922073 | + | 2.66E-15 | 1.57E-13   | -43.0615942  |



|      |           |           |   |          |          |              |
|------|-----------|-----------|---|----------|----------|--------------|
| chr4 | 148922093 | 148922093 | + | 1.75E-13 | 8.71E-12 | -42.29954828 |
| chr4 | 148922112 | 148922112 | + | 3.19E-06 | 5.91E-05 | -33.56643357 |
| chr4 | 148922116 | 148922116 | + | 4.62E-11 | 1.79E-09 | -35.97122302 |
| chr4 | 148922233 | 148922233 | - | 0        | 0        | -54.33518862 |
| chr4 | 148922241 | 148922241 | - | 0        | 0        | -53.93939394 |
| chr4 | 148922266 | 148922266 | + | 0        | 0        | -48.83308113 |
| chr4 | 148922267 | 148922267 | - | 1.11E-16 | 7.26E-15 | -44.38982975 |
| chr4 | 148922271 | 148922271 | - | 0        | 0        | -27.14361382 |
| chr4 | 148922293 | 148922293 | + | 0        | 0        | -47.78582539 |
| chr4 | 148922294 | 148922294 | - | 0        | 0        | -48.32726742 |
| chr4 | 148922302 | 148922302 | + | 2.00E-15 | 1.19E-13 | -72.71791352 |
| chr4 | 148922303 | 148922303 | - | 0        | 0        | -55.4195486  |
| chr4 | 148922640 | 148922640 | + | 0        | 0        | -50.32993112 |
| chr4 | 148922735 | 148922735 | - | 0        | 0        | -56.8877551  |
| chr4 | 148922769 | 148922769 | + | 0        | 0        | -57.13554987 |
| chr4 | 148922770 | 148922770 | - | 0        | 0        | -57.34896968 |
| chr4 | 148922808 | 148922808 | + | 4.44E-16 | 2.79E-14 | -26.50581812 |
| chr4 | 148922809 | 148922809 | - | 2.22E-16 | 1.43E-14 | -26.08013358 |
| chr4 | 148922840 | 148922840 | + | 0        | 0        | -37.98906049 |
| chr4 | 148922857 | 148922857 | + | 0        | 0        | -30.92654783 |
| chr4 | 148952009 | 148952009 | + | 0        | 0        | -41.31898937 |
| chr4 | 148952017 | 148952017 | + | 0        | 0        | -37.32083936 |
| chr4 | 148952039 | 148952039 | + | 0        | 0        | -40.78152143 |
| chr4 | 148952051 | 148952051 | + | 0        | 0        | -34.39093571 |
| chr4 | 148952059 | 148952059 | + | 0        | 0        | -32.69544085 |
| chr4 | 148952060 | 148952060 | - | 0        | 0        | -35.08318326 |
| chr4 | 148952068 | 148952068 | - | 0        | 0        | -35.71097466 |
| chr4 | 148952081 | 148952081 | - | 0        | 0        | -35.49394939 |
| chr4 | 148952095 | 148952095 | - | 0        | 0        | -44.23808112 |
| chr4 | 148952105 | 148952105 | + | 0        | 0        | -32.49662912 |
| chr4 | 148952106 | 148952106 | - | 0        | 0        | -37.44621265 |
| chr4 | 148952127 | 148952127 | + | 0        | 0        | -31.34344805 |
| chr4 | 148952138 | 148952138 | + | 0        | 0        | -44.95456021 |
| chr4 | 148952145 | 148952145 | + | 0        | 0        | -30.3252326  |
| chr4 | 148952148 | 148952148 | + | 0        | 0        | -38.19107242 |
| chr4 | 148952181 | 148952181 | - | 0        | 0        | -35.08535594 |
| chr4 | 148952187 | 148952187 | - | 0        | 0        | -46.66429895 |
| chr4 | 148952203 | 148952203 | - | 0        | 0        | -42.96257163 |
| chr4 | 148952211 | 148952211 | - | 0        | 0        | -53.97578187 |
| chr4 | 148952221 | 148952221 | - | 0        | 0        | -33.02571663 |
| chr4 | 148952241 | 148952241 | + | 1.33E-09 | 4.32E-08 | -46.08766234 |

|      |           |           |   |          |          |              |
|------|-----------|-----------|---|----------|----------|--------------|
| chr4 | 148952248 | 148952248 | + | 1.05E-10 | 3.89E-09 | -44.63097878 |
| chr4 | 148952253 | 148952253 | + | 1.40E-09 | 4.52E-08 | -43.56984479 |
| chr4 | 148952259 | 148952259 | + | 9.83E-09 | 2.82E-07 | -42.5087108  |
| chr4 | 148952264 | 148952264 | + | 1.64E-12 | 7.42E-11 | -44.89928525 |
| chr4 | 148952274 | 148952274 | + | 3.49E-09 | 1.07E-07 | -40.81406398 |
| chr4 | 148952280 | 148952280 | + | 4.46E-12 | 1.93E-10 | -50.64977258 |
| chr4 | 148952283 | 148952283 | + | 3.06E-09 | 9.45E-08 | -39.28170595 |
| chr4 | 148952326 | 148952326 | - | 0        | 0        | -44.55949809 |
| chr4 | 148952350 | 148952350 | - | 0        | 0        | -47.68382951 |
| chr4 | 148952353 | 148952353 | - | 0        | 0        | -43.39519651 |
| chr4 | 148952369 | 148952369 | + | 0        | 0        | -36.94427783 |
| chr4 | 148952370 | 148952370 | - | 0        | 0        | -38.51298774 |
| chr4 | 148952382 | 148952382 | + | 0        | 0        | -41.83931873 |
| chr4 | 148952388 | 148952388 | + | 0        | 0        | -40.5096809  |
| chr4 | 148952391 | 148952391 | + | 0        | 0        | -35.91644714 |
| chr4 | 148952394 | 148952394 | + | 0        | 0        | -41.28044256 |
| chr4 | 148952403 | 148952403 | + | 0        | 0        | -44.97439443 |
| chr4 | 148952415 | 148952415 | + | 0        | 0        | -44.60328776 |
| chr4 | 148952418 | 148952418 | + | 0        | 0        | -43.40290753 |
| chr4 | 148952496 | 148952496 | - | 0        | 0        | -47.31961382 |
| chr4 | 148952500 | 148952500 | - | 0        | 0        | -36.76581325 |
| chr4 | 148952505 | 148952505 | - | 0        | 0        | -34.59843907 |
| chr4 | 148952509 | 148952509 | - | 0        | 0        | -34.3135352  |
| chr4 | 148952511 | 148952511 | - | 0        | 0        | -42.9417326  |
| chr4 | 148952513 | 148952513 | - | 0        | 0        | -34.07000751 |
| chr4 | 148952520 | 148952520 | - | 0        | 0        | -47.76785714 |
| chr4 | 148952541 | 148952541 | + | 0        | 0        | -44.46131825 |
| chr4 | 148952542 | 148952542 | - | 0        | 0        | -53.39249748 |
| chr4 | 148952549 | 148952549 | + | 0        | 0        | -32.54702194 |
| chr4 | 148952556 | 148952556 | + | 0        | 0        | -30.91780271 |
| chr4 | 148952559 | 148952559 | + | 0        | 0        | -40.27029128 |
| chr4 | 148952573 | 148952573 | + | 0        | 0        | -34.25188076 |
| chr4 | 148952576 | 148952576 | + | 0        | 0        | -39.23809524 |
| chr4 | 148952578 | 148952578 | + | 0        | 0        | -31.12639838 |
| chr4 | 148952635 | 148952635 | - | 0        | 0        | -41.32131896 |
| chr4 | 148952643 | 148952643 | - | 0        | 0        | -37.47733151 |
| chr4 | 148952660 | 148952660 | - | 0        | 0        | -37.58109972 |
| chr4 | 148952671 | 148952671 | - | 0        | 0        | -43.61114579 |
| chr4 | 148952674 | 148952674 | - | 0        | 0        | -26.48467153 |
| chr4 | 148952682 | 148952682 | + | 0        | 0        | -37.57390983 |
| chr4 | 148952689 | 148952689 | + | 0        | 0        | -41.22875092 |

|      |           |           |   |            |            |              |
|------|-----------|-----------|---|------------|------------|--------------|
| chr4 | 148952695 | 148952695 | + | 0          | 0          | -38.41463415 |
| chr4 | 148952705 | 148952705 | + | 0          | 0          | -40.34061414 |
| chr4 | 148952710 | 148952710 | + | 0          | 0          | -36.87479693 |
| chr4 | 148952730 | 148952730 | + | 4.71E-12   | 2.03E-10   | -44.32630098 |
| chr4 | 148952834 | 148952834 | - | 5.55E-16   | 3.46E-14   | -37.71695594 |
| chr4 | 148952836 | 148952836 | - | 3.24E-13   | 1.57E-11   | -38.17527011 |
| chr4 | 148952864 | 148952864 | - | 0          | 0          | -44.56367162 |
| chr4 | 148952875 | 148952875 | + | 0          | 0          | -29.53654126 |
| chr4 | 148952876 | 148952876 | - | 2.00E-07   | 4.67E-06   | -26.41364769 |
| chr4 | 148952888 | 148952888 | + | 0          | 0          | -45.05007127 |
| chr4 | 148952928 | 148952928 | - | 0          | 0          | -41.71884164 |
| chr4 | 148952970 | 148952970 | + | 0          | 0          | -33.14888218 |
| chr4 | 148952971 | 148952971 | - | 0          | 0          | -35.21903561 |
| chr4 | 148952974 | 148952974 | + | 0          | 0          | -28.63007438 |
| chr4 | 148952980 | 148952980 | + | 0          | 0          | -39.39540623 |
| chr4 | 148952995 | 148952995 | + | 0          | 0          | -36.7881781  |
| chr4 | 149126977 | 149126977 | + | 0          | 0          | -25.2515009  |
| chr4 | 149126978 | 149126978 | - | 9.91E-13   | 4.57E-11   | -31.82952623 |
| chr4 | 149564556 | 149564556 | - | 0.00065191 | 0.00620658 | 25.55555556  |
| chr4 | 149565142 | 149565142 | + | 0          | 0          | -31.19297642 |
| chr4 | 149567548 | 149567548 | + | 0          | 0          | -25.9223557  |
| chr4 | 149587863 | 149587863 | + | 3.08E-05   | 0.00045072 | -32.19070134 |
| chr4 | 149587873 | 149587873 | + | 1.03E-08   | 2.96E-07   | -45.69479966 |
| chr4 | 149588011 | 149588011 | - | 3.65E-12   | 1.59E-10   | -34.2209507  |
| chr4 | 149588015 | 149588015 | - | 5.55E-16   | 3.46E-14   | -36.59149636 |
| chr4 | 149588019 | 149588019 | - | 2.84E-12   | 1.25E-10   | -32.92016303 |
| chr4 | 149588047 | 149588047 | - | 1.73E-13   | 8.59E-12   | -35.94706369 |
| chr4 | 149647240 | 149647240 | + | 0.00022143 | 0.00249881 | -26.03174603 |
| chr4 | 149647245 | 149647245 | + | 1.37E-05   | 0.00021863 | -31.14291911 |
| chr4 | 149647504 | 149647504 | + | 8.45E-09   | 2.45E-07   | -27.39154424 |
| chr4 | 149782642 | 149782642 | + | 0          | 0          | -43.03451048 |
| chr4 | 149782667 | 149782667 | + | 0          | 0          | -37.59722552 |
| chr4 | 149782671 | 149782671 | + | 0          | 0          | -38.32363715 |
| chr4 | 149782675 | 149782675 | + | 0          | 0          | -40.22190649 |
| chr4 | 149782809 | 149782809 | - | 3.82E-07   | 8.50E-06   | -39.50498232 |
| chr4 | 149782812 | 149782812 | - | 0.00021629 | 0.00244969 | -29.65144039 |
| chr4 | 149854648 | 149854648 | + | 2.68E-07   | 6.13E-06   | -49.00744417 |
| chr4 | 149854651 | 149854651 | + | 6.95E-07   | 1.47E-05   | -54.47667087 |
| chr4 | 149854655 | 149854655 | + | 1.79E-07   | 4.22E-06   | -59.1025641  |
| chr4 | 149854662 | 149854662 | + | 2.58E-07   | 5.92E-06   | -53.20512821 |
| chr4 | 149854686 | 149854686 | + | 0.0009905  | 0.00876117 | -32.13820078 |

|      |           |           |   |           |            |              |
|------|-----------|-----------|---|-----------|------------|--------------|
| chr4 | 149863670 | 149863670 | + | 0         | 0          | -28.73577097 |
| chr4 | 149863678 | 149863678 | + | 0         | 0          | -30.38999939 |
| chr4 | 150003519 | 150003519 | - | 0         | 0          | -28.95885668 |
| chr4 | 150006553 | 150006553 | + | 3.89E-15  | 2.26E-13   | -26.65567766 |
| chr4 | 150060720 | 150060720 | - | 0         | 0          | -27.35380774 |
| chr4 | 150060729 | 150060729 | - | 0         | 0          | -27.5562827  |
| chr4 | 150060738 | 150060738 | + | 0         | 0          | -27.21977422 |
| chr4 | 150060739 | 150060739 | - | 0         | 0          | -27.33017018 |
| chr4 | 150060753 | 150060753 | + | 0         | 0          | -27.65789584 |
| chr4 | 150060855 | 150060855 | + | 0         | 0          | -25.37515861 |
| chr4 | 150094351 | 150094351 | + | 1.67E-10  | 6.06E-09   | -26.86696886 |
| chr4 | 150144514 | 150144514 | + | 0         | 0          | -28.06209377 |
| chr4 | 150144587 | 150144587 | - | 7.35E-14  | 3.79E-12   | -28.3741826  |
| chr4 | 150573165 | 150573165 | - | 0.0001109 | 0.00137822 | -29.26829268 |
| chr4 | 150748748 | 150748748 | + | 2.85E-08  | 7.64E-07   | -34.05081157 |
| chr4 | 150757633 | 150757633 | + | 7.91E-11  | 2.98E-09   | -25.19847644 |
| chr4 | 150825234 | 150825234 | - | 7.30E-06  | 0.00012474 | -31.86907838 |
| chr4 | 150825270 | 150825270 | - | 1.05E-05  | 0.00017311 | -32.86764706 |
| chr4 | 150889820 | 150889820 | - | 0         | 0          | -25.03247832 |
| chr4 | 150889830 | 150889830 | - | 0         | 0          | -31.71696724 |
| chr4 | 150889853 | 150889853 | - | 0         | 0          | -28.21637427 |
| chr4 | 150889855 | 150889855 | - | 0         | 0          | -30.31078732 |
| chr4 | 151983406 | 151983406 | - | 7.01E-13  | 3.29E-11   | -26.79817499 |
| chr4 | 151983432 | 151983432 | - | 0         | 0          | -40.37267081 |
| chr4 | 151983442 | 151983442 | - | 7.15E-13  | 3.35E-11   | -25.99858607 |
| chr4 | 152100919 | 152100919 | - | 1.34E-11  | 5.48E-10   | -37.80821918 |
| chr4 | 152100969 | 152100969 | - | 1.89E-07  | 4.44E-06   | -28.56394588 |
| chr4 | 152101822 | 152101822 | + | 8.89E-11  | 3.33E-09   | -34.48960366 |
| chr4 | 152102191 | 152102191 | - | 0         | 0          | -26.26350976 |
| chr4 | 152126718 | 152126718 | - | 2.22E-15  | 1.32E-13   | -40.30180126 |
| chr4 | 152126745 | 152126745 | + | 0         | 0          | -39.96354657 |
| chr4 | 152126746 | 152126746 | - | 0         | 0          | -53.87878043 |
| chr4 | 152126752 | 152126752 | + | 0         | 0          | -29.2066973  |
| chr4 | 152126807 | 152126807 | - | 0         | 0          | -36.40016562 |
| chr4 | 152126843 | 152126843 | + | 0         | 0          | -32.87702119 |
| chr4 | 152126844 | 152126844 | - | 0         | 0          | -30.28308206 |
| chr4 | 152126853 | 152126853 | + | 0         | 0          | -38.79361136 |
| chr4 | 152126866 | 152126866 | + | 0         | 0          | -34.52684617 |
| chr4 | 152129398 | 152129398 | + | 0         | 0          | -35.04271149 |
| chr4 | 152129435 | 152129435 | + | 0         | 0          | -31.41738196 |
| chr4 | 152129436 | 152129436 | - | 0         | 0          | -30.64642685 |

|      |           |           |   |            |            |              |
|------|-----------|-----------|---|------------|------------|--------------|
| chr4 | 152129450 | 152129450 | + | 0          | 0          | -37.57814684 |
| chr4 | 152129460 | 152129460 | + | 0          | 0          | -39.56862745 |
| chr4 | 152129464 | 152129464 | + | 0          | 0          | -42.23634389 |
| chr4 | 152129567 | 152129567 | - | 0          | 0          | -31.08456653 |
| chr4 | 152292604 | 152292604 | + | 0          | 0          | -27.48445066 |
| chr4 | 152348388 | 152348388 | - | 0.00066729 | 0.00632696 | 33.69111509  |
| chr4 | 152392692 | 152392692 | + | 2.23E-06   | 4.27E-05   | 45.23809524  |
| chr4 | 152414443 | 152414443 | + | 0          | 0          | -37.44712477 |
| chr4 | 152435080 | 152435080 | + | 2.13E-14   | 1.16E-12   | -33.11594638 |
| chr4 | 152435378 | 152435378 | + | 0          | 0          | -44.11932939 |
| chr4 | 152435379 | 152435379 | - | 0          | 0          | -33.35526698 |
| chr4 | 152493448 | 152493448 | + | 0          | 0          | -26.77975086 |
| chr4 | 152546469 | 152546469 | + | 4.60E-10   | 1.58E-08   | -27.44970798 |
| chr4 | 152697649 | 152697649 | - | 6.90E-10   | 2.32E-08   | -27.90004114 |
| chr4 | 152774881 | 152774881 | - | 1.37E-07   | 3.30E-06   | 28.02199611  |
| chr4 | 153708602 | 153708602 | - | 0          | 0          | -45.73891626 |
| chr4 | 153708632 | 153708632 | - | 0          | 0          | -52.37804878 |
| chr4 | 154019509 | 154019509 | + | 2.10E-09   | 6.63E-08   | -31.68767052 |
| chr4 | 154019693 | 154019693 | - | 1.07E-08   | 3.05E-07   | -25.14039367 |
| chr4 | 154025478 | 154025478 | - | 0          | 0          | -25.46805578 |
| chr4 | 154025510 | 154025510 | - | 0          | 0          | -25.27942781 |
| chr4 | 154187296 | 154187296 | + | 7.73E-13   | 3.61E-11   | -27.01623755 |
| chr4 | 154187307 | 154187307 | + | 0          | 0          | -36.14951357 |
| chr4 | 154247828 | 154247828 | - | 8.27E-05   | 0.00106937 | -28.85443583 |
| chr4 | 154247836 | 154247836 | - | 1.18E-05   | 0.000192   | -33.50559862 |
| chr4 | 154298146 | 154298146 | + | 0          | 0          | -27.06030361 |
| chr4 | 154323340 | 154323340 | - | 0          | 0          | -26.08649234 |
| chr4 | 154328782 | 154328782 | - | 2.22E-16   | 1.43E-14   | -28.2635153  |
| chr4 | 154425314 | 154425314 | - | 2.36E-08   | 6.42E-07   | -37.68853695 |
| chr4 | 154471217 | 154471217 | - | 3.54E-05   | 0.00050907 | -27.53623188 |
| chr4 | 154471990 | 154471990 | + | 0          | 0          | -33.45387261 |
| chr4 | 154482579 | 154482579 | + | 1.92E-10   | 6.93E-09   | -27.25756691 |
| chr4 | 154499784 | 154499784 | - | 0          | 0          | -30.15689456 |
| chr4 | 154499900 | 154499900 | + | 0          | 0          | -36.69370325 |
| chr4 | 154499901 | 154499901 | - | 0          | 0          | -39.57738795 |
| chr4 | 154499912 | 154499912 | + | 0          | 0          | -40.39568884 |
| chr4 | 154500068 | 154500068 | - | 1.05E-14   | 5.88E-13   | -34.6656335  |
| chr4 | 154500075 | 154500075 | + | 0          | 0          | -28.40150152 |
| chr4 | 154500190 | 154500190 | - | 0          | 0          | -28.29931632 |
| chr4 | 154500211 | 154500211 | - | 0          | 0          | -32.23860657 |
| chr4 | 154500223 | 154500223 | - | 0          | 0          | -30.87247983 |

|      |           |           |   |          |          |              |
|------|-----------|-----------|---|----------|----------|--------------|
| chr4 | 154540959 | 154540959 | - | 0        | 0        | -28.43236095 |
| chr4 | 154540968 | 154540968 | - | 0        | 0        | -38.4325816  |
| chr4 | 154540988 | 154540988 | - | 0        | 0        | -30.5187589  |
| chr4 | 154540997 | 154540997 | - | 0        | 0        | -30.53265236 |
| chr4 | 154541000 | 154541000 | + | 4.43E-11 | 1.72E-09 | -31.15459883 |
| chr4 | 154541001 | 154541001 | - | 0        | 0        | -28.06561259 |
| chr4 | 154541024 | 154541024 | + | 0        | 0        | -45.99114609 |
| chr4 | 154541146 | 154541146 | - | 0        | 0        | -33.2808399  |
| chr4 | 154541153 | 154541153 | - | 0        | 0        | -29.81005189 |
| chr4 | 154544059 | 154544059 | + | 0        | 0        | -49.78900923 |
| chr4 | 154544063 | 154544063 | + | 0        | 0        | -44.41891421 |
| chr4 | 154544065 | 154544065 | + | 0        | 0        | -48.89908257 |
| chr4 | 154544125 | 154544125 | - | 0        | 0        | -34.96751843 |
| chr4 | 154544133 | 154544133 | - | 0        | 0        | -44.75737218 |
| chr4 | 154544150 | 154544150 | - | 0        | 0        | -29.50266112 |
| chr4 | 154544157 | 154544157 | - | 0        | 0        | -31.83236712 |
| chr4 | 154544170 | 154544170 | + | 0        | 0        | -28.26454034 |
| chr4 | 154544171 | 154544171 | - | 0        | 0        | -26.53019794 |
| chr4 | 154549716 | 154549716 | + | 1.33E-09 | 4.32E-08 | -33.78739316 |
| chr4 | 154554102 | 154554102 | + | 1.57E-14 | 8.60E-13 | -58.98283735 |
| chr4 | 154554110 | 154554110 | + | 2.56E-07 | 5.87E-06 | -38.8996139  |
| chr4 | 154556074 | 154556074 | + | 0        | 0        | -34.74903475 |
| chr4 | 154556209 | 154556209 | - | 0        | 0        | -25.08312071 |
| chr4 | 154558957 | 154558957 | + | 6.70E-07 | 1.42E-05 | -26.11009174 |
| chr4 | 154570226 | 154570226 | + | 0        | 0        | -27.50310559 |
| chr4 | 154585339 | 154585339 | - | 0        | 0        | -26.0842289  |
| chr4 | 154586350 | 154586350 | + | 0        | 0        | -35.60689765 |
| chr4 | 154586366 | 154586366 | + | 0        | 0        | -40.02466429 |
| chr4 | 154586373 | 154586373 | + | 0        | 0        | -32.04958501 |
| chr4 | 154627031 | 154627031 | + | 0        | 0        | -25.60252548 |
| chr4 | 154627092 | 154627092 | - | 0        | 0        | -31.3718031  |
| chr4 | 154638320 | 154638320 | + | 0        | 0        | -28.37643678 |
| chr4 | 154638321 | 154638321 | - | 0        | 0        | -31.20757919 |
| chr4 | 154640430 | 154640430 | + | 1.11E-16 | 7.26E-15 | -26.22500141 |
| chr4 | 154640477 | 154640477 | + | 0        | 0        | -29.26991856 |
| chr4 | 154641019 | 154641019 | + | 2.22E-16 | 1.43E-14 | -33.99220558 |
| chr4 | 154641141 | 154641141 | - | 2.22E-16 | 1.43E-14 | -26.606356   |
| chr4 | 154641179 | 154641179 | + | 0        | 0        | -34.86362494 |
| chr4 | 154641180 | 154641180 | - | 0        | 0        | -27.55320647 |
| chr4 | 154641206 | 154641206 | + | 0        | 0        | -41.46899841 |
| chr4 | 154641207 | 154641207 | - | 0        | 0        | -38.02033898 |

|      |           |           |   |            |            |              |
|------|-----------|-----------|---|------------|------------|--------------|
| chr4 | 154641213 | 154641213 | + | 9.33E-13   | 4.32E-11   | -29.70089496 |
| chr4 | 154641214 | 154641214 | - | 0          | 0          | -25.13972056 |
| chr4 | 154641228 | 154641228 | + | 0          | 0          | -38.08722845 |
| chr4 | 154641244 | 154641244 | + | 0          | 0          | -40.47619048 |
| chr4 | 154641338 | 154641338 | + | 0          | 0          | -25.23861302 |
| chr4 | 154641443 | 154641443 | - | 0          | 0          | -32.64687506 |
| chr4 | 154641461 | 154641461 | - | 0          | 0          | -34.20372026 |
| chr4 | 154641472 | 154641472 | - | 0          | 0          | -35.7662175  |
| chr4 | 154641476 | 154641476 | - | 0          | 0          | -27.94792454 |
| chr4 | 154641478 | 154641478 | - | 0          | 0          | -30.42938008 |
| chr4 | 154641484 | 154641484 | + | 0          | 0          | -34.00444807 |
| chr4 | 154641485 | 154641485 | - | 0          | 0          | -29.58045019 |
| chr4 | 154641488 | 154641488 | + | 0          | 0          | -43.25340622 |
| chr4 | 154641514 | 154641514 | + | 0          | 0          | -43.57608434 |
| chr4 | 154641523 | 154641523 | + | 0          | 0          | -39.19598591 |
| chr4 | 154641527 | 154641527 | + | 0          | 0          | -43.40744844 |
| chr4 | 154641533 | 154641533 | + | 0          | 0          | -40.04994747 |
| chr4 | 154641555 | 154641555 | - | 0          | 0          | -35.60202527 |
| chr4 | 154641571 | 154641571 | - | 0          | 0          | -35.20378943 |
| chr4 | 154641587 | 154641587 | + | 9.26E-11   | 3.46E-09   | -46.36174636 |
| chr4 | 154641588 | 154641588 | - | 0          | 0          | -38.37077515 |
| chr4 | 154641600 | 154641600 | + | 8.73E-13   | 4.05E-11   | -53.21637427 |
| chr4 | 154641831 | 154641831 | - | 2.04E-10   | 7.32E-09   | -45.64007421 |
| chr4 | 154641851 | 154641851 | + | 0          | 0          | -43.54035695 |
| chr4 | 154641852 | 154641852 | - | 9.97E-11   | 3.71E-09   | -45.80981329 |
| chr4 | 154641883 | 154641883 | + | 0          | 0          | -47.93572234 |
| chr4 | 154642037 | 154642037 | - | 8.14E-10   | 2.72E-08   | -27.31481481 |
| chr4 | 154741579 | 154741579 | - | 0          | 0          | -26.24347924 |
| chr4 | 154957138 | 154957138 | + | 0.00026389 | 0.00290416 | -28.47985348 |
| chr4 | 154958505 | 154958505 | - | 0          | 0          | -49.65749061 |
| chr4 | 154958511 | 154958511 | - | 0          | 0          | -49.7062005  |
| chr4 | 154958535 | 154958535 | - | 0          | 0          | -32.52892177 |
| chr4 | 154984002 | 154984002 | + | 0.00011739 | 0.00144761 | -32.05427178 |
| chr4 | 154984014 | 154984014 | - | 0.0001234  | 0.00151165 | -29.14414414 |
| chr4 | 155115969 | 155115969 | + | 4.29E-05   | 0.00060353 | -29.26652142 |
| chr4 | 155116298 | 155116298 | + | 0          | 0          | -30.23229606 |
| chr4 | 155116313 | 155116313 | - | 0          | 0          | -35.56046989 |
| chr4 | 155116329 | 155116329 | - | 0          | 0          | -32.07146286 |
| chr4 | 155116340 | 155116340 | - | 3.00E-14   | 1.60E-12   | -28.19256757 |
| chr4 | 155152108 | 155152108 | - | 0          | 0          | -29.82303643 |
| chr4 | 155219028 | 155219028 | + | 0          | 0          | -28.92187304 |

|      |           |           |   |            |            |              |
|------|-----------|-----------|---|------------|------------|--------------|
| chr4 | 155219029 | 155219029 | - | 3.33E-15   | 1.95E-13   | -30.74178552 |
| chr4 | 155219040 | 155219040 | - | 7.11E-15   | 4.03E-13   | -30.13693795 |
| chr4 | 155219064 | 155219064 | - | 0.00063039 | 0.00603454 | -41.66666667 |
| chr4 | 155425967 | 155425967 | + | 0          | 0          | -34.32923067 |
| chr4 | 155425985 | 155425985 | + | 0          | 0          | -31.46149817 |
| chr4 | 155426096 | 155426096 | - | 1.02E-11   | 4.23E-10   | -25.80623578 |
| chr4 | 155426116 | 155426116 | - | 4.44E-16   | 2.79E-14   | -30.46778963 |
| chr4 | 155426119 | 155426119 | - | 0          | 0          | -32.49258644 |
| chr4 | 155427456 | 155427456 | - | 0.00012295 | 0.00150718 | 29.25465839  |
| chr4 | 155625416 | 155625416 | - | 6.66E-06   | 0.00011496 | 31.77064551  |
| chr4 | 155655355 | 155655355 | - | 0          | 0          | -37.6958951  |
| chr4 | 155655365 | 155655365 | - | 0          | 0          | -40.06077058 |
| chr4 | 155655370 | 155655370 | - | 0          | 0          | -32.27753678 |
| chr4 | 155655396 | 155655396 | - | 0          | 0          | -40.62625918 |
| chr4 | 155738340 | 155738340 | - | 3.22E-06   | 5.97E-05   | -42.10526316 |
| chr4 | 155738349 | 155738349 | + | 6.94E-05   | 0.00091862 | -26.96351268 |
| chr4 | 155738350 | 155738350 | - | 0.00044614 | 0.0045206  | -30.65268065 |
| chr4 | 155770621 | 155770621 | - | 0          | 0          | -30.66857649 |
| chr4 | 155770622 | 155770622 | + | 0          | 0          | -30.84988505 |
| chr4 | 155770623 | 155770623 | - | 0          | 0          | -26.96441258 |
| chr4 | 155770628 | 155770628 | + | 0          | 0          | -31.43782576 |
| chr4 | 155770629 | 155770629 | - | 0          | 0          | -30.25938484 |
| chr4 | 155770635 | 155770635 | - | 0          | 0          | -36.12837606 |
| chr4 | 155770643 | 155770643 | - | 0          | 0          | -32.36705544 |
| chr4 | 155770791 | 155770791 | - | 0          | 0          | -32.77322634 |
| chr4 | 155781176 | 155781176 | + | 0          | 0          | -30.01837032 |
| chr4 | 155781203 | 155781203 | + | 0          | 0          | -33.81719033 |
| chr4 | 155839651 | 155839651 | + | 0          | 0          | -38.74521948 |
| chr4 | 155839714 | 155839714 | - | 0          | 0          | -38.65439937 |
| chr4 | 155839736 | 155839736 | - | 0          | 0          | -30.65294591 |
| chr4 | 156034713 | 156034713 | + | 1.12E-08   | 3.19E-07   | -31.7875727  |
| chr4 | 156034738 | 156034738 | + | 4.90E-10   | 1.68E-08   | -34.57742484 |
| chr4 | 156034822 | 156034822 | - | 0          | 0          | -28.1280508  |
| chr4 | 156034839 | 156034839 | - | 0          | 0          | -33.76809591 |
| chr4 | 156034968 | 156034968 | - | 0          | 0          | -25.99942059 |
| chr4 | 156233893 | 156233893 | + | 0          | 0          | -35.61701523 |
| chr4 | 156234003 | 156234003 | - | 0          | 0          | -32.22336188 |
| chr4 | 156234028 | 156234028 | - | 0          | 0          | -29.44570888 |
| chr5 | 3216265   | 3216265   | - | 8.45E-05   | 0.00108927 | -27.86393714 |
| chr5 | 3382468   | 3382468   | - | 0          | 0          | -32.30568895 |
| chr5 | 3382479   | 3382479   | - | 0          | 0          | -35.06470246 |



|      |          |          |   |            |            |              |
|------|----------|----------|---|------------|------------|--------------|
| chr5 | 3382506  | 3382506  | - | 0          | 0          | -25.32043462 |
| chr5 | 3382515  | 3382515  | + | 7.24E-12   | 3.06E-10   | -36.90044546 |
| chr5 | 3382516  | 3382516  | - | 0          | 0          | -32.10112868 |
| chr5 | 4755766  | 4755766  | + | 1.83E-06   | 3.57E-05   | -27.4523749  |
| chr5 | 4755940  | 4755940  | - | 2.05E-07   | 4.78E-06   | -26.66897267 |
| chr5 | 5507977  | 5507977  | - | 1.11E-16   | 7.26E-15   | -32.80694586 |
| chr5 | 5507991  | 5507991  | - | 1.45E-11   | 5.93E-10   | -25.69356486 |
| chr5 | 5750848  | 5750848  | - | 2.85E-05   | 0.0004199  | -29.11111111 |
| chr5 | 7249730  | 7249730  | + | 1.22E-07   | 2.95E-06   | -51.71990172 |
| chr5 | 24347988 | 24347988 | + | 0          | 0          | -30.69729341 |
| chr5 | 24353117 | 24353117 | + | 2.40E-08   | 6.52E-07   | -31.01112724 |
| chr5 | 24364658 | 24364658 | + | 0          | 0          | -31.26671577 |
| chr5 | 24364659 | 24364659 | - | 0          | 0          | -25.93478013 |
| chr5 | 24364670 | 24364670 | + | 0          | 0          | -33.39105339 |
| chr5 | 24364671 | 24364671 | - | 0          | 0          | -29.43196803 |
| chr5 | 24364693 | 24364693 | - | 0          | 0          | -32.52224974 |
| chr5 | 24413766 | 24413766 | + | 0.00015526 | 0.00184391 | -29.9689441  |
| chr5 | 24427428 | 24427428 | - | 0          | 0          | -49.01960784 |
| chr5 | 24427445 | 24427445 | - | 0          | 0          | -47.37115313 |
| chr5 | 24427473 | 24427473 | + | 7.05E-08   | 1.78E-06   | -36.71622495 |
| chr5 | 24427474 | 24427474 | - | 3.46E-11   | 1.36E-09   | -31.61849711 |
| chr5 | 24427493 | 24427493 | + | 2.16E-08   | 5.91E-07   | -35.79817312 |
| chr5 | 24427650 | 24427650 | - | 9.34E-12   | 3.90E-10   | -32.23285486 |
| chr5 | 24427688 | 24427688 | - | 0          | 0          | -50.45964023 |
| chr5 | 24427694 | 24427694 | - | 2.06E-10   | 7.40E-09   | -32.72660076 |
| chr5 | 24428138 | 24428138 | + | 0          | 0          | -47.91641648 |
| chr5 | 24428154 | 24428154 | + | 0          | 0          | -39.32423351 |
| chr5 | 24428181 | 24428181 | + | 0          | 0          | -49.08988601 |
| chr5 | 24428182 | 24428182 | - | 0          | 0          | -42.40734875 |
| chr5 | 24428188 | 24428188 | + | 0          | 0          | -49.02067864 |
| chr5 | 24428189 | 24428189 | - | 0          | 0          | -50.03748284 |
| chr5 | 24428207 | 24428207 | + | 2.64E-06   | 4.99E-05   | -65          |
| chr5 | 24428208 | 24428208 | - | 0          | 0          | -52.78761787 |
| chr5 | 24428315 | 24428315 | - | 0          | 0          | -54.1178384  |
| chr5 | 24428355 | 24428355 | - | 0          | 0          | -28.37683986 |
| chr5 | 24428362 | 24428362 | - | 0          | 0          | -35.92076775 |
| chr5 | 24474263 | 24474263 | + | 0          | 0          | -26.03333627 |
| chr5 | 24474270 | 24474270 | + | 0          | 0          | -29.68069561 |
| chr5 | 24474288 | 24474288 | + | 0          | 0          | -30.70982793 |
| chr5 | 24474289 | 24474289 | - | 0          | 0          | -31.68802145 |
| chr5 | 24474313 | 24474313 | - | 0          | 0          | -25.96939083 |

|      |          |          |   |            |            |              |
|------|----------|----------|---|------------|------------|--------------|
| chr5 | 24482496 | 24482496 | - | 0          | 0          | -30.65233763 |
| chr5 | 24482581 | 24482581 | - | 5.05E-10   | 1.73E-08   | -26.16098463 |
| chr5 | 24482591 | 24482591 | - | 7.96E-14   | 4.09E-12   | -30.10498997 |
| chr5 | 24482637 | 24482637 | + | 3.33E-16   | 2.11E-14   | -25.90140338 |
| chr5 | 24483013 | 24483013 | - | 0          | 0          | -25.69397005 |
| chr5 | 24488734 | 24488734 | + | 0          | 0          | -32.23972765 |
| chr5 | 24548071 | 24548071 | - | 1.88E-14   | 1.02E-12   | -33.84610439 |
| chr5 | 24591078 | 24591078 | + | 0          | 0          | -29.43239897 |
| chr5 | 24591079 | 24591079 | - | 0          | 0          | -30.56142027 |
| chr5 | 24591088 | 24591088 | + | 0          | 0          | -38.03202673 |
| chr5 | 24591139 | 24591139 | + | 0          | 0          | -45.74081832 |
| chr5 | 24591140 | 24591140 | - | 0          | 0          | -30.47107389 |
| chr5 | 24591162 | 24591162 | + | 4.61E-08   | 1.20E-06   | -28.125      |
| chr5 | 24685032 | 24685032 | + | 0          | 0          | -25.73918712 |
| chr5 | 24750299 | 24750299 | + | 0          | 0          | -25.44700752 |
| chr5 | 24750322 | 24750322 | + | 0          | 0          | -27.87693898 |
| chr5 | 24750337 | 24750337 | + | 0          | 0          | -25.12480811 |
| chr5 | 24750343 | 24750343 | - | 0          | 0          | -26.83600352 |
| chr5 | 24750392 | 24750392 | + | 0          | 0          | -25.86762459 |
| chr5 | 24750409 | 24750409 | + | 0          | 0          | -30.68622742 |
| chr5 | 24757834 | 24757834 | - | 4.91E-10   | 1.68E-08   | -27.55102041 |
| chr5 | 24757871 | 24757871 | - | 0.00025144 | 0.00278596 | -26.697476   |
| chr5 | 24778760 | 24778760 | + | 7.75E-14   | 3.99E-12   | -28.34849422 |
| chr5 | 24778784 | 24778784 | + | 8.74E-13   | 4.05E-11   | -27.27704987 |
| chr5 | 24778800 | 24778800 | + | 3.33E-16   | 2.11E-14   | -30.91206311 |
| chr5 | 24778880 | 24778880 | - | 0          | 0          | -32.96795485 |
| chr5 | 24872111 | 24872111 | + | 0          | 0          | -35.45454545 |
| chr5 | 25059228 | 25059228 | - | 0          | 0          | -45.81443299 |
| chr5 | 25059254 | 25059254 | - | 5.62E-09   | 1.67E-07   | -32.56616801 |
| chr5 | 25532375 | 25532375 | + | 0          | 0          | -29.58576622 |
| chr5 | 30110430 | 30110430 | + | 0          | 0          | -28.39885208 |
| chr5 | 30110442 | 30110442 | + | 0          | 0          | -43.62258355 |
| chr5 | 30110535 | 30110535 | - | 0          | 0          | -37.93099785 |
| chr5 | 30110572 | 30110572 | - | 0          | 0          | -27.52240143 |
| chr5 | 30110576 | 30110576 | - | 0          | 0          | -56.8699139  |
| chr5 | 30110588 | 30110588 | + | 0          | 0          | -31.27889779 |
| chr5 | 30110592 | 30110592 | + | 0          | 0          | -30.48681542 |
| chr5 | 30110615 | 30110615 | + | 1.11E-16   | 7.26E-15   | -25.6268081  |
| chr5 | 30110695 | 30110695 | - | 0          | 0          | -26.11797588 |
| chr5 | 30115941 | 30115941 | - | 0          | 0          | -26.81988899 |
| chr5 | 30115972 | 30115972 | + | 3.34E-08   | 8.86E-07   | -26.99239651 |

|      |          |          |   |            |            |              |
|------|----------|----------|---|------------|------------|--------------|
| chr5 | 30945087 | 30945087 | - | 1.11E-16   | 7.26E-15   | -25.06294016 |
| chr5 | 30945135 | 30945135 | + | 7.60E-06   | 0.00012933 | -25.43556681 |
| chr5 | 31059484 | 31059484 | + | 2.91E-06   | 5.44E-05   | -54.54545455 |
| chr5 | 31197985 | 31197985 | + | 0          | 0          | -29.57136343 |
| chr5 | 31197986 | 31197986 | - | 0.0010537  | 0.00921483 | -26.69555796 |
| chr5 | 31198082 | 31198082 | + | 1.01E-13   | 5.12E-12   | -27.64857881 |
| chr5 | 31198103 | 31198103 | + | 1.55E-15   | 9.35E-14   | -28.74502626 |
| chr5 | 31254511 | 31254511 | - | 3.94E-07   | 8.74E-06   | -36.44444444 |
| chr5 | 33217646 | 33217646 | - | 4.42E-06   | 7.95E-05   | -28.16901408 |
| chr5 | 33540097 | 33540097 | - | 0          | 0          | -28.90848524 |
| chr5 | 33694984 | 33694984 | + | 4.93E-12   | 2.12E-10   | -37.17767929 |
| chr5 | 33695115 | 33695115 | - | 0          | 0          | -36.32795576 |
| chr5 | 33695149 | 33695149 | - | 0          | 0          | -30.80994017 |
| chr5 | 33695841 | 33695841 | + | 0          | 0          | -32.5658731  |
| chr5 | 33695861 | 33695861 | + | 0          | 0          | -49.24482294 |
| chr5 | 33695964 | 33695964 | - | 0          | 0          | -43.69458128 |
| chr5 | 33695981 | 33695981 | - | 0          | 0          | -35.97810869 |
| chr5 | 33696005 | 33696005 | + | 0          | 0          | -43.86035313 |
| chr5 | 33696006 | 33696006 | - | 0          | 0          | -33.40996169 |
| chr5 | 33696019 | 33696019 | + | 0          | 0          | -47.64931396 |
| chr5 | 33696249 | 33696249 | - | 6.17E-11   | 2.35E-09   | -37.88107162 |
| chr5 | 33700513 | 33700513 | - | 0.00046804 | 0.00470651 | -28.85964912 |
| chr5 | 33700542 | 33700542 | + | 0          | 0          | -25.5752355  |
| chr5 | 33700543 | 33700543 | - | 1.84E-07   | 4.32E-06   | -26.08299134 |
| chr5 | 33723889 | 33723889 | + | 0          | 0          | -39.30471648 |
| chr5 | 33723893 | 33723893 | + | 0          | 0          | -44.12228421 |
| chr5 | 33723900 | 33723900 | + | 0          | 0          | -45.65576102 |
| chr5 | 33723908 | 33723908 | + | 0          | 0          | -25.04060901 |
| chr5 | 33723960 | 33723960 | - | 0          | 0          | -40.58801756 |
| chr5 | 33723980 | 33723980 | + | 0          | 0          | -38.85201751 |
| chr5 | 33724023 | 33724023 | + | 0          | 0          | -31.76082863 |
| chr5 | 33724024 | 33724024 | - | 0          | 0          | -32.44776119 |
| chr5 | 34252531 | 34252531 | - | 4.52E-06   | 8.10E-05   | -27.84998434 |
| chr5 | 34604839 | 34604839 | + | 1.21E-05   | 0.00019636 | -26.5060241  |
| chr5 | 34931982 | 34931982 | + | 0          | 0          | -28.14386713 |
| chr5 | 34931983 | 34931983 | - | 1.25E-07   | 3.04E-06   | -31.66666667 |
| chr5 | 34932126 | 34932126 | + | 1.28E-07   | 3.09E-06   | -28.18018018 |
| chr5 | 35397599 | 35397599 | - | 0.00010794 | 0.00134651 | -31.29411765 |
| chr5 | 35670244 | 35670244 | + | 4.44E-16   | 2.79E-14   | -38.1626351  |
| chr5 | 35670264 | 35670264 | + | 1.11E-16   | 7.26E-15   | -44.30889033 |
| chr5 | 35670456 | 35670456 | - | 7.32E-05   | 0.00096217 | -25.70630573 |

|      |          |          |   |            |            |              |
|------|----------|----------|---|------------|------------|--------------|
| chr5 | 35670485 | 35670485 | - | 3.41E-07   | 7.65E-06   | -29.83312983 |
| chr5 | 35678986 | 35678986 | + | 0          | 0          | -41.63967611 |
| chr5 | 35679025 | 35679025 | + | 2.79E-11   | 1.11E-09   | -31.78347423 |
| chr5 | 35894623 | 35894623 | + | 9.20E-12   | 3.84E-10   | -29.61304952 |
| chr5 | 35894634 | 35894634 | + | 9.71E-08   | 2.39E-06   | -26.7021524  |
| chr5 | 35922144 | 35922144 | - | 7.20E-05   | 0.0009486  | -28.84399551 |
| chr5 | 36374146 | 36374146 | + | 3.87E-14   | 2.05E-12   | -27.89396171 |
| chr5 | 37893456 | 37893456 | - | 0          | 0          | -32.62589532 |
| chr5 | 38483812 | 38483812 | + | 0.00051974 | 0.00513797 | -26.625387   |
| chr5 | 39715208 | 39715208 | - | 4.92E-10   | 1.69E-08   | -25.81929037 |
| chr5 | 43771596 | 43771596 | + | 2.06E-11   | 8.30E-10   | -27.45127436 |
| chr5 | 44094873 | 44094873 | - | 6.10E-09   | 1.81E-07   | -28.90103218 |
| chr5 | 44101795 | 44101795 | - | 0          | 0          | -32.96938585 |
| chr5 | 44246665 | 44246665 | + | 0.00035228 | 0.00370712 | -39.875      |
| chr5 | 47887514 | 47887514 | + | 0.00062918 | 0.0060248  | -36.57142857 |
| chr5 | 52535053 | 52535053 | - | 0          | 0          | -26.11156838 |
| chr5 | 52910645 | 52910645 | - | 2.10E-08   | 5.76E-07   | -31.11056126 |
| chr5 | 53013451 | 53013451 | - | 0.00061987 | 0.00595122 | -27.5        |
| chr5 | 53013493 | 53013493 | - | 1.49E-06   | 2.95E-05   | -28          |
| chr5 | 53998079 | 53998079 | - | 8.94E-10   | 2.97E-08   | -28.44044164 |
| chr5 | 57720599 | 57720599 | + | 0          | 0          | -27.25       |
| chr5 | 57720610 | 57720610 | + | 0          | 0          | -29.67603337 |
| chr5 | 57720754 | 57720754 | + | 0          | 0          | -29.26779809 |
| chr5 | 57720755 | 57720755 | - | 0          | 0          | -33.34840835 |
| chr5 | 57720780 | 57720780 | + | 0          | 0          | -25.07815683 |
| chr5 | 57720900 | 57720900 | - | 0          | 0          | -28.39771052 |
| chr5 | 59439943 | 59439943 | + | 0.00084572 | 0.00769522 | -26.66666667 |
| chr5 | 62314158 | 62314158 | - | 0          | 0          | -33.46247542 |
| chr5 | 63875052 | 63875052 | + | 0          | 0          | -27.6809712  |
| chr5 | 63875135 | 63875135 | - | 0          | 0          | -25.13610608 |
| chr5 | 63932814 | 63932814 | - | 5.52E-06   | 9.70E-05   | -31.88449848 |
| chr5 | 64298843 | 64298843 | - | 0          | 0          | -49.79251767 |
| chr5 | 64298855 | 64298855 | - | 0          | 0          | -54.55623388 |
| chr5 | 64298863 | 64298863 | - | 0          | 0          | -36.28011952 |
| chr5 | 64392496 | 64392496 | + | 0          | 0          | -26.5273622  |
| chr5 | 64647334 | 64647334 | + | 7.84E-06   | 0.00013302 | -29.42307692 |
| chr5 | 64647566 | 64647566 | + | 3.76E-10   | 1.31E-08   | -43.02279874 |
| chr5 | 64647567 | 64647567 | - | 2.89E-11   | 1.14E-09   | -42.04715204 |
| chr5 | 65175308 | 65175308 | - | 6.75E-05   | 0.00089646 | 40.96969697  |
| chr5 | 65561815 | 65561815 | + | 0.00021156 | 0.00240443 | -41.12318841 |
| chr5 | 66004676 | 66004676 | - | 8.39E-12   | 3.52E-10   | -39.07563025 |

|      |          |          |   |          |            |              |
|------|----------|----------|---|----------|------------|--------------|
| chr5 | 66218808 | 66218808 | + | 0        | 0          | -32.56081263 |
| chr5 | 66218895 | 66218895 | - | 2.93E-14 | 1.57E-12   | -28.88999325 |
| chr5 | 66312527 | 66312527 | - | 0        | 0          | -33.05369709 |
| chr5 | 66312534 | 66312534 | - | 0        | 0          | -33.42001987 |
| chr5 | 66312544 | 66312544 | - | 0        | 0          | -35.69099589 |
| chr5 | 66337142 | 66337142 | + | 0        | 0          | -33.24499069 |
| chr5 | 66337143 | 66337143 | - | 0        | 0          | -27.13895637 |
| chr5 | 66362582 | 66362582 | + | 0        | 0          | -25.94611145 |
| chr5 | 66469802 | 66469802 | + | 4.49E-09 | 1.35E-07   | -27.23063973 |
| chr5 | 66469813 | 66469813 | + | 6.51E-10 | 2.20E-08   | -27.16312057 |
| chr5 | 66470000 | 66470000 | - | 0        | 0          | -39.56162925 |
| chr5 | 66545982 | 66545982 | + | 6.14E-09 | 1.82E-07   | -33.16564858 |
| chr5 | 66745448 | 66745448 | + | 0        | 0          | -28.58860269 |
| chr5 | 66800238 | 66800238 | + | 1.10E-06 | 2.24E-05   | -49.02143523 |
| chr5 | 66801872 | 66801872 | + | 3.83E-08 | 1.01E-06   | -31.18556701 |
| chr5 | 67377397 | 67377397 | - | 1.99E-09 | 6.29E-08   | -30.59698047 |
| chr5 | 67426507 | 67426507 | + | 0        | 0          | -32.76659769 |
| chr5 | 67600560 | 67600560 | - | 1.98E-09 | 6.28E-08   | -35.21311475 |
| chr5 | 67609135 | 67609135 | - | 3.53E-14 | 1.88E-12   | -36.53189578 |
| chr5 | 67633921 | 67633921 | + | 0        | 0          | -38.03030303 |
| chr5 | 67633971 | 67633971 | + | 4.97E-14 | 2.61E-12   | -27.36486486 |
| chr5 | 73360507 | 73360507 | - | 0        | 0          | -26.46552784 |
| chr5 | 73734812 | 73734812 | - | 0        | 0          | -26.21072556 |
| chr5 | 74076956 | 74076956 | + | 0        | 0          | -27.02044582 |
| chr5 | 74076957 | 74076957 | - | 0        | 0          | -30.26424695 |
| chr5 | 74077236 | 74077236 | - | 1.31E-09 | 4.25E-08   | -36.67285096 |
| chr5 | 74077244 | 74077244 | - | 1.93E-07 | 4.53E-06   | -30.58467742 |
| chr5 | 74077269 | 74077269 | - | 9.06E-10 | 3.01E-08   | -35.32072368 |
| chr5 | 74078057 | 74078057 | + | 0        | 0          | -29.60800929 |
| chr5 | 74078075 | 74078075 | + | 0        | 0          | -29.22605443 |
| chr5 | 74078076 | 74078076 | - | 0        | 0          | -31.39001108 |
| chr5 | 74078121 | 74078121 | - | 0        | 0          | -26.52538333 |
| chr5 | 74172415 | 74172415 | - | 9.89E-10 | 3.27E-08   | -29.99441575 |
| chr5 | 74172418 | 74172418 | - | 4.52E-14 | 2.38E-12   | -34.68518777 |
| chr5 | 74172438 | 74172438 | - | 0        | 0          | -38.97959184 |
| chr5 | 74172441 | 74172441 | - | 2.71E-10 | 9.59E-09   | -29.02357704 |
| chr5 | 74172460 | 74172460 | + | 0        | 0          | -32.96319092 |
| chr5 | 74172465 | 74172465 | + | 0        | 0          | -25.808244   |
| chr5 | 74214701 | 74214701 | - | 9.40E-06 | 0.00015652 | -27.38519213 |
| chr5 | 74214727 | 74214727 | - | 2.48E-09 | 7.77E-08   | -38.89843452 |
| chr5 | 74260517 | 74260517 | + | 0        | 0          | -27.60610372 |

|      |          |          |   |            |            |              |
|------|----------|----------|---|------------|------------|--------------|
| chr5 | 74260656 | 74260656 | - | 0          | 0          | -30.63980682 |
| chr5 | 74823272 | 74823272 | - | 0          | 0          | -25.1876819  |
| chr5 | 74874558 | 74874558 | + | 2.64E-11   | 1.05E-09   | -25.27449729 |
| chr5 | 75149366 | 75149366 | + | 2.81E-10   | 9.91E-09   | -35.47619048 |
| chr5 | 75589461 | 75589461 | - | 2.38E-12   | 1.06E-10   | -40.20058888 |
| chr5 | 75604526 | 75604526 | + | 3.48E-11   | 1.37E-09   | -32.97484907 |
| chr5 | 75628092 | 75628092 | + | 0          | 0          | -39.12401055 |
| chr5 | 75743822 | 75743822 | + | 1.11E-16   | 7.26E-15   | -26.63617219 |
| chr5 | 75800508 | 75800508 | - | 1.33E-09   | 4.31E-08   | -32.28736581 |
| chr5 | 75800528 | 75800528 | - | 1.27E-07   | 3.08E-06   | -28.29158638 |
| chr5 | 75800537 | 75800537 | - | 3.65E-09   | 1.11E-07   | -31.21026012 |
| chr5 | 76079639 | 76079639 | + | 0.00043647 | 0.00443724 | -32.89473684 |
| chr5 | 76079844 | 76079844 | - | 2.12E-07   | 4.93E-06   | -27.38352028 |
| chr5 | 76363209 | 76363209 | + | 1.30E-05   | 0.0002097  | -27.40237238 |
| chr5 | 76708295 | 76708295 | - | 2.15E-08   | 5.89E-07   | -33.67346939 |
| chr5 | 76713945 | 76713945 | + | 3.94E-05   | 0.00056013 | -27.33333333 |
| chr5 | 77114996 | 77114996 | - | 6.73E-13   | 3.16E-11   | -25.89417989 |
| chr5 | 77115023 | 77115023 | - | 3.22E-15   | 1.89E-13   | -28.36192046 |
| chr5 | 77115035 | 77115035 | - | 1.11E-16   | 7.26E-15   | -28.98404278 |
| chr5 | 77122871 | 77122871 | + | 0          | 0          | -32.80900852 |
| chr5 | 77122897 | 77122897 | + | 0          | 0          | -35.45200624 |
| chr5 | 77122953 | 77122953 | + | 0          | 0          | -39.67313059 |
| chr5 | 77122954 | 77122954 | - | 0          | 0          | -34.4853849  |
| chr5 | 77122994 | 77122994 | - | 0          | 0          | -36.81219681 |
| chr5 | 77357555 | 77357555 | - | 4.01E-05   | 0.00056868 | -32.0802005  |
| chr5 | 77405861 | 77405861 | - | 7.30E-09   | 2.14E-07   | -25.5389357  |
| chr5 | 77429256 | 77429256 | + | 0.0002848  | 0.00309854 | -31.61196911 |
| chr5 | 88679470 | 88679470 | - | 0.00022535 | 0.0025366  | -31.45057766 |
| chr5 | 90394660 | 90394660 | - | 0.00011457 | 0.00141706 | -28.00207039 |
| chr5 | 90786299 | 90786299 | - | 0          | 0          | -25.35934446 |
| chr5 | 90789234 | 90789234 | + | 1.09E-07   | 2.67E-06   | -28.10168555 |
| chr5 | 91958002 | 91958002 | + | 0          | 0          | -35.96279823 |
| chr5 | 91958003 | 91958003 | - | 0          | 0          | -34.22884091 |
| chr5 | 92228950 | 92228950 | - | 0          | 0          | -26.20256787 |
| chr5 | 92368661 | 92368661 | - | 0.00070152 | 0.00659253 | -27.5248561  |
| chr5 | 92450341 | 92450341 | + | 4.51E-06   | 8.08E-05   | -30.71658615 |
| chr5 | 92503641 | 92503641 | - | 4.01E-11   | 1.56E-09   | -27.23753666 |
| chr5 | 92503659 | 92503659 | - | 0          | 0          | -31.67538669 |
| chr5 | 92674793 | 92674793 | + | 9.59E-05   | 0.00121585 | -29.43911654 |
| chr5 | 92699245 | 92699245 | - | 0.00056281 | 0.00549221 | -25.92476489 |
| chr5 | 92699288 | 92699288 | + | 0          | 0          | -25.43926808 |

|      |          |          |   |          |          |              |
|------|----------|----------|---|----------|----------|--------------|
| chr5 | 92699296 | 92699296 | + | 0        | 0        | -29.3456737  |
| chr5 | 92809495 | 92809495 | + | 6.86E-09 | 2.02E-07 | -30.10708881 |
| chr5 | 92809496 | 92809496 | - | 2.68E-07 | 6.14E-06 | -25.44642857 |
| chr5 | 92809499 | 92809499 | - | 4.39E-09 | 1.33E-07 | -29.7389816  |
| chr5 | 92959844 | 92959844 | + | 0        | 0        | -32.73846894 |
| chr5 | 92959994 | 92959994 | - | 1.27E-11 | 5.23E-10 | -33.00878972 |
| chr5 | 95371354 | 95371354 | + | 1.69E-07 | 4.00E-06 | 55.55555556  |
| chr5 | 95974059 | 95974059 | - | 0        | 0        | -25.8518339  |
| chr5 | 96979404 | 96979404 | + | 0        | 0        | -27.19918458 |
| chr5 | 97935513 | 97935513 | + | 0        | 0        | -38.7616554  |
| chr5 | 97935517 | 97935517 | + | 0        | 0        | -31.30568207 |
| chr5 | 97935531 | 97935531 | + | 0        | 0        | -43.49261226 |
| chr5 | 97935532 | 97935532 | - | 0        | 0        | -38.6411278  |
| chr5 | 97935535 | 97935535 | + | 0        | 0        | -47.9716202  |
| chr5 | 97935536 | 97935536 | - | 0        | 0        | -38.62791259 |
| chr5 | 97935539 | 97935539 | + | 0        | 0        | -42.08049387 |
| chr5 | 97935540 | 97935540 | - | 0        | 0        | -31.24062969 |
| chr5 | 97935543 | 97935543 | + | 0        | 0        | -35.31174049 |
| chr5 | 97935544 | 97935544 | - | 0        | 0        | -32.18479234 |
| chr5 | 97935551 | 97935551 | + | 0        | 0        | -44.25807442 |
| chr5 | 97935552 | 97935552 | - | 0        | 0        | -40.90509788 |
| chr5 | 97935554 | 97935554 | - | 0        | 0        | -26.45349763 |
| chr5 | 97935555 | 97935555 | + | 0        | 0        | -40.23907834 |
| chr5 | 97935556 | 97935556 | - | 0        | 0        | -40.31558275 |
| chr5 | 97935565 | 97935565 | - | 0        | 0        | -49.89094788 |
| chr5 | 97935569 | 97935569 | - | 0        | 0        | -32.49658936 |
| chr5 | 97935573 | 97935573 | + | 0        | 0        | -31.6071124  |
| chr5 | 97935576 | 97935576 | + | 0        | 0        | -39.74093159 |
| chr5 | 97935580 | 97935580 | + | 0        | 0        | -47.28644901 |
| chr5 | 97935581 | 97935581 | - | 0        | 0        | -46.9400464  |
| chr5 | 97935593 | 97935593 | + | 0        | 0        | -44.26403451 |
| chr5 | 97935594 | 97935594 | - | 0        | 0        | -50.77576252 |
| chr5 | 97935595 | 97935595 | + | 0        | 0        | -46.90939344 |
| chr5 | 97935596 | 97935596 | - | 0        | 0        | -48.22189281 |
| chr5 | 97935613 | 97935613 | + | 0        | 0        | -47.54672291 |
| chr5 | 97935614 | 97935614 | - | 0        | 0        | -47.46320326 |
| chr5 | 97935633 | 97935633 | + | 0        | 0        | -34.45988324 |
| chr5 | 97935635 | 97935635 | + | 0        | 0        | -41.45022032 |
| chr5 | 97935670 | 97935670 | + | 0        | 0        | -45.12411446 |
| chr5 | 97935727 | 97935727 | - | 0        | 0        | -30.37994987 |
| chr5 | 97935734 | 97935734 | - | 0        | 0        | -45.43544937 |

|      |           |           |   |            |            |              |
|------|-----------|-----------|---|------------|------------|--------------|
| chr5 | 97935751  | 97935751  | - | 0          | 0          | -45.20237304 |
| chr5 | 97935757  | 97935757  | + | 3.42E-09   | 1.05E-07   | -55.89907605 |
| chr5 | 97935758  | 97935758  | - | 0          | 0          | -32.90982368 |
| chr5 | 98166233  | 98166233  | + | 0          | 0          | -30.67518144 |
| chr5 | 98166256  | 98166256  | + | 0          | 0          | -34.97867804 |
| chr5 | 98166274  | 98166274  | + | 0          | 0          | -42.95931102 |
| chr5 | 98192895  | 98192895  | + | 0          | 0          | -26.5051262  |
| chr5 | 98568671  | 98568671  | + | 0.00074291 | 0.00691276 | 31.81818182  |
| chr5 | 99032994  | 99032994  | - | 0.00113134 | 0.00976514 | 30.83333333  |
| chr5 | 99336956  | 99336956  | - | 6.40E-12   | 2.72E-10   | -27.66535243 |
| chr5 | 99688009  | 99688009  | + | 6.39E-07   | 1.36E-05   | -41.30434783 |
| chr5 | 100091856 | 100091856 | + | 0          | 0          | -25.91582971 |
| chr5 | 100091857 | 100091857 | - | 0          | 0          | -27.82035806 |
| chr5 | 100751564 | 100751564 | - | 0.00028533 | 0.00310331 | -41.78321678 |
| chr5 | 101246269 | 101246269 | + | 9.68E-05   | 0.00122597 | 47.02380952  |
| chr5 | 101539327 | 101539327 | + | 0          | 0          | -25.65285112 |
| chr5 | 101969915 | 101969915 | + | 3.10E-08   | 8.27E-07   | -25.84016196 |
| chr5 | 101970021 | 101970021 | - | 0          | 0          | -29.15647155 |
| chr5 | 101970034 | 101970034 | - | 0          | 0          | -29.28913747 |
| chr5 | 102046265 | 102046265 | + | 2.86E-06   | 5.37E-05   | 25.62136436  |
| chr5 | 102752048 | 102752048 | + | 0.00023315 | 0.00261206 | -27.97903851 |
| chr5 | 102752354 | 102752354 | - | 1.23E-10   | 4.54E-09   | -25.62951693 |
| chr5 | 102768870 | 102768870 | + | 4.68E-05   | 0.00065093 | -27.70390071 |
| chr5 | 102845981 | 102845981 | - | 0          | 0          | -33.47877658 |
| chr5 | 102845997 | 102845997 | - | 0          | 0          | -32.09392771 |
| chr5 | 102846031 | 102846031 | - | 0          | 0          | -31.57637678 |
| chr5 | 102846070 | 102846070 | + | 5.47E-12   | 2.34E-10   | -33.20476737 |
| chr5 | 102846164 | 102846164 | - | 0          | 0          | -28.98769389 |
| chr5 | 103360480 | 103360480 | + | 0.00068435 | 0.00646071 | 36.0446571   |
| chr5 | 103423671 | 103423671 | + | 0          | 0          | -33.89981652 |
| chr5 | 103436115 | 103436115 | + | 0          | 0          | -25.94235589 |
| chr5 | 103436131 | 103436131 | + | 0          | 0          | -29.58059418 |
| chr5 | 103436132 | 103436132 | - | 0          | 0          | -31.98462929 |
| chr5 | 103436136 | 103436136 | + | 0          | 0          | -35.03820883 |
| chr5 | 103436137 | 103436137 | - | 0          | 0          | -34.57788077 |
| chr5 | 103436154 | 103436154 | + | 0          | 0          | -38.10121995 |
| chr5 | 103436155 | 103436155 | - | 0          | 0          | -32.83250588 |
| chr5 | 103436174 | 103436174 | + | 0          | 0          | -38.42928294 |
| chr5 | 103436175 | 103436175 | - | 0          | 0          | -33.45139273 |
| chr5 | 103436764 | 103436764 | + | 0          | 0          | -35.19829401 |
| chr5 | 103436833 | 103436833 | - | 0          | 0          | -27.78713029 |



|      |           |           |   |            |            |              |
|------|-----------|-----------|---|------------|------------|--------------|
| chr5 | 103814658 | 103814658 | + | 0          | 0          | -35.81067307 |
| chr5 | 103814695 | 103814695 | + | 0          | 0          | -38.7694312  |
| chr5 | 103814772 | 103814772 | - | 0          | 0          | -33.04407303 |
| chr5 | 103854461 | 103854461 | - | 6.54E-09   | 1.93E-07   | -36.614623   |
| chr5 | 103854473 | 103854473 | - | 3.49E-07   | 7.81E-06   | -31.41957053 |
| chr5 | 104025255 | 104025255 | - | 0          | 0          | -33.02716296 |
| chr5 | 105427387 | 105427387 | + | 2.22E-13   | 1.10E-11   | -30.43024678 |
| chr5 | 105707069 | 105707069 | - | 0.00049097 | 0.00489925 | -34.79674797 |
| chr5 | 106123060 | 106123060 | + | 0.00023874 | 0.00266593 | 27.06571243  |
| chr5 | 106502088 | 106502088 | - | 0.00056759 | 0.00553117 | 25.91836735  |
| chr5 | 106711763 | 106711763 | - | 0.00090286 | 0.00812117 | -34.76890756 |
| chr5 | 106816406 | 106816406 | - | 7.66E-05   | 0.00100045 | -29.3983822  |
| chr5 | 106816428 | 106816428 | - | 1.17E-06   | 2.37E-05   | -35.91954023 |
| chr5 | 107001981 | 107001981 | - | 0.00011574 | 0.00142969 | -29.48717949 |
| chr5 | 107018624 | 107018624 | - | 0          | 0          | -29.06157414 |
| chr5 | 107721030 | 107721030 | + | 0          | 0          | -41.77516269 |
| chr5 | 107721058 | 107721058 | + | 0          | 0          | -63.18446186 |
| chr5 | 107721063 | 107721063 | + | 0          | 0          | -46.08144885 |
| chr5 | 107721177 | 107721177 | - | 0          | 0          | -49.96072931 |
| chr5 | 107721186 | 107721186 | - | 0          | 0          | -46.24255358 |
| chr5 | 107721190 | 107721190 | - | 0          | 0          | -52.58908255 |
| chr5 | 107721207 | 107721207 | - | 0          | 0          | -58.69057502 |
| chr5 | 107721217 | 107721217 | + | 0          | 0          | -50.07968127 |
| chr5 | 107721218 | 107721218 | - | 0          | 0          | -52.24896483 |
| chr5 | 107721220 | 107721220 | + | 0          | 0          | -59.23860115 |
| chr5 | 107721224 | 107721224 | + | 5.09E-13   | 2.42E-11   | -40.31514392 |
| chr5 | 107721239 | 107721239 | + | 0          | 0          | -53.45728198 |
| chr5 | 107721243 | 107721243 | + | 0          | 0          | -71.9477645  |
| chr5 | 107721265 | 107721265 | + | 0          | 0          | -54.25040425 |
| chr5 | 107721454 | 107721454 | - | 4.81E-13   | 2.29E-11   | -45.86956522 |
| chr5 | 107721460 | 107721460 | - | 0          | 0          | -60.48951049 |
| chr5 | 107721470 | 107721470 | - | 1.80E-14   | 9.82E-13   | -53.01026451 |
| chr5 | 107721472 | 107721472 | - | 7.61E-13   | 3.55E-11   | -40.09080142 |
| chr5 | 107721481 | 107721481 | - | 3.40E-14   | 1.81E-12   | -42.2325306  |
| chr5 | 107721503 | 107721503 | + | 0          | 0          | -40.52190153 |
| chr5 | 107721504 | 107721504 | - | 2.38E-10   | 8.48E-09   | -39.62018991 |
| chr5 | 107721520 | 107721520 | + | 0          | 0          | -51.90376338 |
| chr5 | 107721521 | 107721521 | - | 0          | 0          | -55.71428571 |
| chr5 | 107721524 | 107721524 | + | 0          | 0          | -49.78935698 |
| chr5 | 107721525 | 107721525 | - | 0          | 0          | -56.9442159  |
| chr5 | 107721528 | 107721528 | + | 0          | 0          | -53.26510762 |

|      |           |           |   |            |            |              |
|------|-----------|-----------|---|------------|------------|--------------|
| chr5 | 107721529 | 107721529 | - | 0          | 0          | -55.17709563 |
| chr5 | 107721537 | 107721537 | + | 0          | 0          | -50.32686219 |
| chr5 | 107721538 | 107721538 | - | 0          | 0          | -45.77974711 |
| chr5 | 107721541 | 107721541 | + | 0          | 0          | -50.85261129 |
| chr5 | 107721544 | 107721544 | + | 0          | 0          | -39.44158279 |
| chr5 | 107721550 | 107721550 | + | 0          | 0          | -47.79920617 |
| chr5 | 107721551 | 107721551 | - | 0          | 0          | -53.53402227 |
| chr5 | 107721552 | 107721552 | + | 0          | 0          | -29.92139552 |
| chr5 | 107721553 | 107721553 | - | 0          | 0          | -35.44135148 |
| chr5 | 107721558 | 107721558 | + | 0          | 0          | -41.2345117  |
| chr5 | 107721559 | 107721559 | - | 0          | 0          | -51.52453444 |
| chr5 | 107721561 | 107721561 | + | 0          | 0          | -39.70639944 |
| chr5 | 107721562 | 107721562 | - | 0          | 0          | -43.96456192 |
| chr5 | 107721577 | 107721577 | + | 0          | 0          | -29.36679999 |
| chr5 | 107721578 | 107721578 | - | 0          | 0          | -33.55532496 |
| chr5 | 107721582 | 107721582 | + | 0          | 0          | -29.16110307 |
| chr5 | 107721583 | 107721583 | - | 0          | 0          | -35.57055938 |
| chr5 | 107721592 | 107721592 | - | 0          | 0          | -54.84511146 |
| chr5 | 107721600 | 107721600 | + | 0          | 0          | -30.10135173 |
| chr5 | 107721625 | 107721625 | + | 0          | 0          | -46.09111784 |
| chr5 | 107721626 | 107721626 | - | 0          | 0          | -35.49169779 |
| chr5 | 107721630 | 107721630 | + | 0          | 0          | -29.91647684 |
| chr5 | 107721636 | 107721636 | + | 0          | 0          | -55.94396344 |
| chr5 | 107721637 | 107721637 | - | 0          | 0          | -46.92275858 |
| chr5 | 107721640 | 107721640 | + | 0          | 0          | -49.00085572 |
| chr5 | 107721641 | 107721641 | - | 0          | 0          | -40.50425837 |
| chr5 | 107721651 | 107721651 | + | 0          | 0          | -33.63567649 |
| chr5 | 107721652 | 107721652 | - | 0          | 0          | -31.92387619 |
| chr5 | 107721657 | 107721657 | + | 0          | 0          | -44.47860963 |
| chr5 | 107721658 | 107721658 | - | 0          | 0          | -39.24206454 |
| chr5 | 107721662 | 107721662 | + | 0          | 0          | -45.81715736 |
| chr5 | 107721663 | 107721663 | - | 0          | 0          | -45.85231376 |
| chr5 | 107721664 | 107721664 | + | 0          | 0          | -41.10593352 |
| chr5 | 107721665 | 107721665 | - | 0          | 0          | -41.79916576 |
| chr5 | 107721671 | 107721671 | - | 0          | 0          | -31.66211053 |
| chr5 | 107721679 | 107721679 | + | 9.62E-08   | 2.37E-06   | -26.53061224 |
| chr5 | 108366590 | 108366590 | - | 0          | 0          | -25.36426561 |
| chr5 | 108448293 | 108448293 | - | 0.00027513 | 0.0030089  | -25.14005602 |
| chr5 | 109531512 | 109531512 | + | 0.00032402 | 0.00345539 | -31.28205128 |
| chr5 | 110100490 | 110100490 | + | 0          | 0          | -36.54781718 |
| chr5 | 110363640 | 110363640 | + | 0          | 0          | -37.63888889 |

|      |           |           |   |          |            |              |
|------|-----------|-----------|---|----------|------------|--------------|
| chr5 | 110363755 | 110363755 | - | 0        | 0          | -26.08064315 |
| chr5 | 110480755 | 110480755 | + | 0        | 0          | -32.71372724 |
| chr5 | 110480756 | 110480756 | - | 0        | 0          | -31.00327288 |
| chr5 | 110480890 | 110480890 | - | 0        | 0          | -26.69772069 |
| chr5 | 110480898 | 110480898 | - | 0        | 0          | -25.61140159 |
| chr5 | 110739537 | 110739537 | - | 1.11E-16 | 7.26E-15   | -46.70168067 |
| chr5 | 111190956 | 111190956 | - | 8.46E-13 | 3.93E-11   | -37.21194879 |
| chr5 | 111200615 | 111200615 | - | 0        | 0          | -26.04570731 |
| chr5 | 111215065 | 111215065 | - | 0.000484 | 0.00484073 | -28.25806452 |
| chr5 | 111228015 | 111228015 | - | 1.11E-16 | 7.26E-15   | -28.60597535 |
| chr5 | 111401252 | 111401252 | + | 0        | 0          | -33.69995317 |
| chr5 | 111408893 | 111408893 | + | 1.24E-07 | 2.99E-06   | -30.98039216 |
| chr5 | 111418559 | 111418559 | + | 0        | 0          | -26.26507734 |
| chr5 | 111418573 | 111418573 | + | 0        | 0          | -32.96086467 |
| chr5 | 111418584 | 111418584 | + | 0        | 0          | -25.8978243  |
| chr5 | 111418588 | 111418588 | + | 0        | 0          | -27.99869622 |
| chr5 | 111418636 | 111418636 | - | 0        | 0          | -37.55832671 |
| chr5 | 111418671 | 111418671 | - | 0        | 0          | -27.1802685  |
| chr5 | 111418687 | 111418687 | - | 0        | 0          | -29.45313735 |
| chr5 | 111418701 | 111418701 | + | 0        | 0          | -27.96425954 |
| chr5 | 111418717 | 111418717 | + | 0        | 0          | -44.94088021 |
| chr5 | 111418718 | 111418718 | - | 0        | 0          | -39.3887217  |
| chr5 | 111418760 | 111418760 | + | 0        | 0          | -37.08578345 |
| chr5 | 111418761 | 111418761 | - | 0        | 0          | -31.77773537 |
| chr5 | 111418777 | 111418777 | + | 0        | 0          | -43.19243896 |
| chr5 | 111418778 | 111418778 | - | 0        | 0          | -37.15153497 |
| chr5 | 111418786 | 111418786 | + | 0        | 0          | -59.42794957 |
| chr5 | 111418787 | 111418787 | - | 0        | 0          | -55.70985906 |
| chr5 | 111418795 | 111418795 | + | 0        | 0          | -43.92612338 |
| chr5 | 111418796 | 111418796 | - | 0        | 0          | -39.18022636 |
| chr5 | 111418800 | 111418800 | + | 0        | 0          | -43.30568697 |
| chr5 | 111418801 | 111418801 | - | 0        | 0          | -38.84471585 |
| chr5 | 111418823 | 111418823 | + | 0        | 0          | -40.37216429 |
| chr5 | 111418824 | 111418824 | - | 0        | 0          | -39.48741049 |
| chr5 | 111418833 | 111418833 | + | 0        | 0          | -53.56795316 |
| chr5 | 111418846 | 111418846 | + | 0        | 0          | -51.65921527 |
| chr5 | 111418872 | 111418872 | + | 0        | 0          | -49.0939538  |
| chr5 | 111418948 | 111418948 | - | 0        | 0          | -46.24628639 |
| chr5 | 111418953 | 111418953 | - | 0        | 0          | -59.16431234 |
| chr5 | 111418964 | 111418964 | - | 0        | 0          | -42.81645411 |
| chr5 | 111418977 | 111418977 | + | 1.70E-14 | 9.30E-13   | -40          |

|      |           |           |   |   |   |              |
|------|-----------|-----------|---|---|---|--------------|
| chr5 | 111419191 | 111419191 | - | 0 | 0 | -40.00948617 |
| chr5 | 111419200 | 111419200 | - | 0 | 0 | -63.05821665 |
| chr5 | 111419206 | 111419206 | - | 0 | 0 | -45.84055213 |
| chr5 | 111419218 | 111419218 | - | 0 | 0 | -63.15923639 |
| chr5 | 111419221 | 111419221 | - | 0 | 0 | -54.23593916 |
| chr5 | 111419226 | 111419226 | + | 0 | 0 | -68.21521553 |
| chr5 | 111419227 | 111419227 | - | 0 | 0 | -55.67623122 |
| chr5 | 111419240 | 111419240 | + | 0 | 0 | -53.52019463 |
| chr5 | 111419262 | 111419262 | + | 0 | 0 | -69.22507534 |
| chr5 | 111419268 | 111419268 | + | 0 | 0 | -72.80392313 |
| chr5 | 111419270 | 111419270 | + | 0 | 0 | -70.53359782 |
| chr5 | 111419354 | 111419354 | - | 0 | 0 | -59.67603421 |
| chr5 | 111419370 | 111419370 | - | 0 | 0 | -52.96817255 |
| chr5 | 111419381 | 111419381 | + | 0 | 0 | -51.70789894 |
| chr5 | 111419382 | 111419382 | - | 0 | 0 | -40.97649427 |
| chr5 | 111419468 | 111419468 | - | 0 | 0 | -36.86426187 |
| chr5 | 111419489 | 111419489 | - | 0 | 0 | -57.98811    |
| chr5 | 111419503 | 111419503 | - | 0 | 0 | -42.72268264 |
| chr5 | 111419505 | 111419505 | - | 0 | 0 | -49.65770309 |
| chr5 | 111419517 | 111419517 | + | 0 | 0 | -29.03924033 |
| chr5 | 111419518 | 111419518 | - | 0 | 0 | -36.92734751 |
| chr5 | 111419524 | 111419524 | + | 0 | 0 | -28.41289637 |
| chr5 | 111419530 | 111419530 | + | 0 | 0 | -30.22668842 |
| chr5 | 111419537 | 111419537 | + | 0 | 0 | -37.09914208 |
| chr5 | 111419547 | 111419547 | + | 0 | 0 | -59.90488385 |
| chr5 | 111419632 | 111419632 | - | 0 | 0 | -29.40724937 |
| chr5 | 111419655 | 111419655 | + | 0 | 0 | -55.30606144 |
| chr5 | 111419656 | 111419656 | - | 0 | 0 | -53.12763589 |
| chr5 | 111419677 | 111419677 | - | 0 | 0 | -39.16365373 |
| chr5 | 111419682 | 111419682 | + | 0 | 0 | -32.40535288 |
| chr5 | 111419778 | 111419778 | - | 0 | 0 | -44.7973307  |
| chr5 | 111419788 | 111419788 | - | 0 | 0 | -35.38648953 |
| chr5 | 111419812 | 111419812 | - | 0 | 0 | -34.62828813 |
| chr5 | 111419816 | 111419816 | + | 0 | 0 | -42.14587841 |
| chr5 | 111419817 | 111419817 | - | 0 | 0 | -35.19959607 |
| chr5 | 111419831 | 111419831 | + | 0 | 0 | -55.45101553 |
| chr5 | 111419837 | 111419837 | + | 0 | 0 | -53.11786693 |
| chr5 | 111419915 | 111419915 | - | 0 | 0 | -48.00758968 |
| chr5 | 111419929 | 111419929 | - | 0 | 0 | -63.34903785 |
| chr5 | 111419940 | 111419940 | - | 0 | 0 | -47.12080154 |
| chr5 | 111419942 | 111419942 | - | 0 | 0 | -41.96564787 |

|      |           |           |   |          |          |              |
|------|-----------|-----------|---|----------|----------|--------------|
| chr5 | 111419962 | 111419962 | + | 0        | 0        | -44.74559752 |
| chr5 | 111419963 | 111419963 | - | 0        | 0        | -50.91656986 |
| chr5 | 111419966 | 111419966 | + | 0        | 0        | -39.10609108 |
| chr5 | 111419991 | 111419991 | + | 0        | 0        | -43.05596539 |
| chr5 | 111419992 | 111419992 | - | 0        | 0        | -43.35607814 |
| chr5 | 111420003 | 111420003 | + | 0        | 0        | -52.63295554 |
| chr5 | 111420004 | 111420004 | - | 0        | 0        | -54.87490095 |
| chr5 | 111420014 | 111420014 | - | 0        | 0        | -61.87650435 |
| chr5 | 111420016 | 111420016 | - | 0        | 0        | -55.32922663 |
| chr5 | 111420056 | 111420056 | + | 0        | 0        | -39.01157498 |
| chr5 | 111420067 | 111420067 | + | 0        | 0        | -54.73013083 |
| chr5 | 111420070 | 111420070 | + | 0        | 0        | -60.43739332 |
| chr5 | 111420072 | 111420072 | + | 0        | 0        | -52.4531432  |
| chr5 | 111420081 | 111420081 | + | 0        | 0        | -49.88168165 |
| chr5 | 111420091 | 111420091 | + | 0        | 0        | -53.47764538 |
| chr5 | 111420096 | 111420096 | + | 0        | 0        | -59.13250511 |
| chr5 | 111420100 | 111420100 | + | 0        | 0        | -42.81312239 |
| chr5 | 111420203 | 111420203 | - | 0        | 0        | -41.69563875 |
| chr5 | 111420214 | 111420214 | - | 0        | 0        | -43.71942126 |
| chr5 | 111420218 | 111420218 | - | 0        | 0        | -25.72078417 |
| chr5 | 111420264 | 111420264 | + | 0        | 0        | -32.19201115 |
| chr5 | 111420265 | 111420265 | - | 0        | 0        | -39.74570285 |
| chr5 | 111420269 | 111420269 | - | 0        | 0        | -29.60308487 |
| chr5 | 111420274 | 111420274 | + | 0        | 0        | -25.48095544 |
| chr5 | 111420292 | 111420292 | + | 0        | 0        | -27.70251602 |
| chr5 | 111420293 | 111420293 | - | 0        | 0        | -31.46328371 |
| chr5 | 111420297 | 111420297 | + | 0        | 0        | -27.20479606 |
| chr5 | 111420298 | 111420298 | - | 0        | 0        | -31.83639667 |
| chr5 | 111420308 | 111420308 | + | 0        | 0        | -26.24156433 |
| chr5 | 111420309 | 111420309 | - | 0        | 0        | -26.98915618 |
| chr5 | 111420315 | 111420315 | + | 0        | 0        | -36.43171456 |
| chr5 | 111420316 | 111420316 | - | 0        | 0        | -38.66108199 |
| chr5 | 111420322 | 111420322 | - | 0        | 0        | -31.06022897 |
| chr5 | 111420381 | 111420381 | - | 3.71E-09 | 1.13E-07 | -30.45563549 |
| chr5 | 111420393 | 111420393 | + | 0        | 0        | -35.27369996 |
| chr5 | 111420400 | 111420400 | + | 0        | 0        | -26.7214639  |
| chr5 | 111420401 | 111420401 | - | 0        | 0        | -27.40463047 |
| chr5 | 111420410 | 111420410 | - | 0        | 0        | -26.19096501 |
| chr5 | 111420428 | 111420428 | - | 0        | 0        | -27.35703681 |
| chr5 | 111420460 | 111420460 | + | 1.09E-11 | 4.50E-10 | -29.41924006 |
| chr5 | 111420793 | 111420793 | + | 0        | 0        | -35.10478211 |

|      |           |           |   |          |            |              |
|------|-----------|-----------|---|----------|------------|--------------|
| chr5 | 111420828 | 111420828 | + | 0        | 0          | -33.53562087 |
| chr5 | 111420892 | 111420892 | - | 0        | 0          | -42.06554508 |
| chr5 | 111420895 | 111420895 | - | 0        | 0          | -41.0616043  |
| chr5 | 111420902 | 111420902 | - | 0        | 0          | -41.60589297 |
| chr5 | 111420953 | 111420953 | + | 0        | 0          | -31.39281686 |
| chr5 | 111420954 | 111420954 | - | 0        | 0          | -30.93113265 |
| chr5 | 111431719 | 111431719 | + | 0        | 0          | -26.77427809 |
| chr5 | 111431720 | 111431720 | - | 0        | 0          | -25.98948961 |
| chr5 | 111506619 | 111506619 | + | 0        | 0          | -26.64897779 |
| chr5 | 111512563 | 111512563 | - | 1.23E-06 | 2.49E-05   | -31.49350649 |
| chr5 | 111530978 | 111530978 | + | 1.53E-07 | 3.65E-06   | -36.82051282 |
| chr5 | 111531228 | 111531228 | - | 5.80E-06 | 0.00010143 | -27.5        |
| chr5 | 111531249 | 111531249 | - | 8.90E-05 | 0.00113955 | -28.18181818 |
| chr5 | 111531256 | 111531256 | + | 0        | 0          | -27.68854598 |
| chr5 | 111531257 | 111531257 | - | 0        | 0          | -27.68409339 |
| chr5 | 111531258 | 111531258 | + | 0        | 0          | -31.23414785 |
| chr5 | 111531259 | 111531259 | - | 0        | 0          | -31.62623081 |
| chr5 | 111531287 | 111531287 | + | 0        | 0          | -31.08856683 |
| chr5 | 111531288 | 111531288 | - | 0        | 0          | -28.48126233 |
| chr5 | 111531298 | 111531298 | + | 0        | 0          | -33.51956042 |
| chr5 | 111531299 | 111531299 | - | 0        | 0          | -37.14007451 |
| chr5 | 111531313 | 111531313 | - | 0        | 0          | -30.61546889 |
| chr5 | 111531371 | 111531371 | + | 1.89E-15 | 1.13E-13   | -54.05462406 |
| chr5 | 111531557 | 111531557 | - | 0        | 0          | -41.75925926 |
| chr5 | 111531591 | 111531591 | - | 0        | 0          | -36.91785323 |
| chr5 | 111626178 | 111626178 | + | 0        | 0          | -34.21094821 |
| chr5 | 111639648 | 111639648 | + | 4.22E-12 | 1.83E-10   | -28.86531226 |
| chr5 | 111639650 | 111639650 | + | 0        | 0          | -31.04840442 |
| chr5 | 111639662 | 111639662 | + | 2.73E-12 | 1.21E-10   | -29.14843884 |
| chr5 | 111639663 | 111639663 | - | 0        | 0          | -30.92717087 |
| chr5 | 111639670 | 111639670 | + | 9.99E-15 | 5.59E-13   | -33.14593301 |
| chr5 | 111639671 | 111639671 | - | 0        | 0          | -29.04415251 |
| chr5 | 111639679 | 111639679 | - | 0        | 0          | -29.97554    |
| chr5 | 111702423 | 111702423 | - | 4.85E-05 | 0.00067163 | -25.26802057 |
| chr5 | 111790696 | 111790696 | + | 0        | 0          | -26.17640424 |
| chr5 | 111805897 | 111805897 | + | 0        | 0          | -29.56884935 |
| chr5 | 111805898 | 111805898 | - | 0        | 0          | -32.79273519 |
| chr5 | 112077200 | 112077200 | + | 7.87E-05 | 0.00102466 | -26.64041995 |
| chr5 | 112133933 | 112133933 | - | 2.64E-05 | 0.00039287 | -27.21017515 |
| chr5 | 112213840 | 112213840 | - | 0        | 0          | -28.09528954 |
| chr5 | 112215393 | 112215393 | + | 0        | 0          | -29.75918056 |

|      |           |           |   |            |            |              |
|------|-----------|-----------|---|------------|------------|--------------|
| chr5 | 112269346 | 112269346 | - | 0          | 0          | -25.4446925  |
| chr5 | 112281184 | 112281184 | - | 0          | 0          | -31.0879056  |
| chr5 | 112292105 | 112292105 | + | 4.58E-06   | 8.21E-05   | -30.40638607 |
| chr5 | 112391066 | 112391066 | + | 4.01E-06   | 7.28E-05   | -26.70068027 |
| chr5 | 112391086 | 112391086 | + | 2.44E-15   | 1.44E-13   | -45.77020202 |
| chr5 | 112391855 | 112391855 | - | 2.06E-08   | 5.66E-07   | -37.36211031 |
| chr5 | 112391864 | 112391864 | - | 4.73E-11   | 1.83E-09   | -41.8802037  |
| chr5 | 112625724 | 112625724 | + | 5.72E-05   | 0.00077655 | -25.91564928 |
| chr5 | 112758795 | 112758795 | - | 1.87E-05   | 0.00028978 | 46.46892655  |
| chr5 | 113026040 | 113026040 | - | 2.13E-08   | 5.84E-07   | -25.66504841 |
| chr5 | 113027014 | 113027014 | + | 2.42E-07   | 5.58E-06   | -28.71459695 |
| chr5 | 113107519 | 113107519 | - | 1.37E-07   | 3.30E-06   | -31.99840492 |
| chr5 | 113107530 | 113107530 | - | 2.90E-06   | 5.43E-05   | -25.14425599 |
| chr5 | 113146027 | 113146027 | + | 1.76E-12   | 7.94E-11   | -38.81809493 |
| chr5 | 113164284 | 113164284 | - | 1.18E-05   | 0.00019246 | -26.35869565 |
| chr5 | 113164326 | 113164326 | + | 0          | 0          | -27.01341433 |
| chr5 | 113164351 | 113164351 | - | 0          | 0          | -29.52852234 |
| chr5 | 113164598 | 113164598 | - | 5.20E-09   | 1.56E-07   | -43.18181818 |
| chr5 | 113164653 | 113164653 | + | 8.34E-08   | 2.08E-06   | -35.85884795 |
| chr5 | 113164774 | 113164774 | - | 0.00085608 | 0.00777325 | -35.89189189 |
| chr5 | 113164780 | 113164780 | + | 0          | 0          | -39.45076514 |
| chr5 | 113164813 | 113164813 | + | 0          | 0          | -29.77693966 |
| chr5 | 113164918 | 113164918 | + | 0          | 0          | -41.38232721 |
| chr5 | 113164954 | 113164954 | + | 0          | 0          | -39.48493015 |
| chr5 | 113164994 | 113164994 | + | 0          | 0          | -34.26764606 |
| chr5 | 113165461 | 113165461 | + | 0          | 0          | -25.73243291 |
| chr5 | 113174812 | 113174812 | - | 1.01E-06   | 2.07E-05   | -29.39516129 |
| chr5 | 113174958 | 113174958 | - | 0          | 0          | -25.05700356 |
| chr5 | 113287314 | 113287314 | + | 0          | 0          | -25.58237493 |
| chr5 | 113336441 | 113336441 | - | 0          | 0          | -28.25687495 |
| chr5 | 113336605 | 113336605 | + | 0          | 0          | -26.64360598 |
| chr5 | 113354749 | 113354749 | + | 0          | 0          | -27.08692566 |
| chr5 | 113503501 | 113503501 | + | 0          | 0          | -46.45821804 |
| chr5 | 113503510 | 113503510 | + | 0          | 0          | -45.48429926 |
| chr5 | 113503731 | 113503731 | + | 0          | 0          | -40.35890529 |
| chr5 | 113503732 | 113503732 | - | 8.33E-15   | 4.69E-13   | -45.23204069 |
| chr5 | 113503737 | 113503737 | + | 0          | 0          | -38.24535538 |
| chr5 | 113503868 | 113503868 | - | 6.36E-09   | 1.88E-07   | -52.34192037 |
| chr5 | 113516950 | 113516950 | + | 0          | 0          | -29.06086653 |
| chr5 | 113630411 | 113630411 | - | 0          | 0          | -27.39148889 |
| chr5 | 113649990 | 113649990 | + | 5.42E-05   | 0.00074033 | -37.78110945 |

|      |           |           |   |            |            |              |
|------|-----------|-----------|---|------------|------------|--------------|
| chr5 | 113890990 | 113890990 | + | 0          | 0          | -25.29048153 |
| chr5 | 113972778 | 113972778 | - | 0          | 0          | -28.58814481 |
| chr5 | 113986783 | 113986783 | + | 2.08E-13   | 1.03E-11   | -34.39869989 |
| chr5 | 113986800 | 113986800 | + | 8.66E-15   | 4.87E-13   | -31.49362654 |
| chr5 | 113986884 | 113986884 | + | 5.03E-06   | 8.92E-05   | -47.56235828 |
| chr5 | 113986885 | 113986885 | - | 0          | 0          | -33.96328427 |
| chr5 | 113987122 | 113987122 | - | 2.46E-10   | 8.73E-09   | -32.67405063 |
| chr5 | 114146705 | 114146705 | - | 0          | 0          | -27.34133479 |
| chr5 | 114146720 | 114146720 | - | 0          | 0          | -31.55492241 |
| chr5 | 114146780 | 114146780 | + | 0          | 0          | -28.67164464 |
| chr5 | 114294752 | 114294752 | - | 4.28E-05   | 0.00060204 | -27.33355637 |
| chr5 | 114363731 | 114363731 | + | 7.93E-09   | 2.31E-07   | -48.32285115 |
| chr5 | 114364020 | 114364020 | + | 0          | 0          | -28.10570723 |
| chr5 | 114550579 | 114550579 | + | 0          | 0          | -29.6621762  |
| chr5 | 114550613 | 114550613 | + | 0          | 0          | -27.85269077 |
| chr5 | 114550614 | 114550614 | - | 0          | 0          | -33.51590985 |
| chr5 | 114551087 | 114551087 | - | 0          | 0          | -27.56350626 |
| chr5 | 114597237 | 114597237 | - | 5.35E-06   | 9.44E-05   | -41.23943662 |
| chr5 | 114654491 | 114654491 | - | 1.52E-08   | 4.26E-07   | -37.01058201 |
| chr5 | 114657706 | 114657706 | + | 0          | 0          | -32.57157464 |
| chr5 | 114657707 | 114657707 | - | 0          | 0          | -28.69892884 |
| chr5 | 114658781 | 114658781 | + | 0          | 0          | -39.4477853  |
| chr5 | 114658859 | 114658859 | - | 0          | 0          | -31.41536009 |
| chr5 | 114691494 | 114691494 | - | 1.05E-08   | 3.01E-07   | -32.88603289 |
| chr5 | 114779824 | 114779824 | + | 0.00026352 | 0.00290078 | -32.04930663 |
| chr5 | 114980307 | 114980307 | + | 0          | 0          | -30.71845906 |
| chr5 | 114980329 | 114980329 | + | 0          | 0          | -30.50978169 |
| chr5 | 114980381 | 114980381 | - | 0          | 0          | -28.71417737 |
| chr5 | 115159202 | 115159202 | - | 0          | 0          | -51.19110569 |
| chr5 | 115159212 | 115159212 | - | 0          | 0          | -38.74131045 |
| chr5 | 115159214 | 115159214 | - | 0          | 0          | -37.2704775  |
| chr5 | 115168812 | 115168812 | + | 0          | 0          | -30.11349915 |
| chr5 | 115169116 | 115169116 | - | 0          | 0          | -29.80423014 |
| chr5 | 115169166 | 115169166 | + | 0          | 0          | -39.75767254 |
| chr5 | 115169167 | 115169167 | - | 0          | 0          | -33.0267815  |
| chr5 | 115186216 | 115186216 | + | 0          | 0          | -27.27636737 |
| chr5 | 115192224 | 115192224 | - | 3.15E-11   | 1.24E-09   | -27.50377216 |
| chr5 | 115215775 | 115215775 | - | 7.76E-07   | 1.63E-05   | -25.98965649 |
| chr5 | 115215814 | 115215814 | + | 0          | 0          | -28.87716011 |
| chr5 | 115216156 | 115216156 | - | 7.09E-12   | 3.00E-10   | -28.93117186 |
| chr5 | 115231433 | 115231433 | - | 0          | 0          | -29.18431498 |



|      |           |           |   |            |            |              |
|------|-----------|-----------|---|------------|------------|--------------|
| chr5 | 115235165 | 115235165 | + | 0          | 0          | -35.11592423 |
| chr5 | 115235215 | 115235215 | - | 0          | 0          | -26.17378041 |
| chr5 | 115235233 | 115235233 | - | 0          | 0          | -29.09791872 |
| chr5 | 115236279 | 115236279 | - | 8.50E-06   | 0.00014306 | -28.96630497 |
| chr5 | 115301696 | 115301696 | - | 0.00101644 | 0.00894972 | -26.92307692 |
| chr5 | 115403538 | 115403538 | + | 2.28E-08   | 6.20E-07   | -47.77933614 |
| chr5 | 115403587 | 115403587 | + | 7.79E-06   | 0.00013226 | -28.53949329 |
| chr5 | 115403930 | 115403930 | - | 0          | 0          | -32.46992309 |
| chr5 | 115404586 | 115404586 | - | 0          | 0          | -26.69536107 |
| chr5 | 115475260 | 115475260 | - | 1.11E-16   | 7.26E-15   | -28.57223892 |
| chr5 | 115480098 | 115480098 | + | 0          | 0          | -35.95847751 |
| chr5 | 115480099 | 115480099 | - | 0          | 0          | -30.03088854 |
| chr5 | 115480132 | 115480132 | + | 1.33E-15   | 8.06E-14   | -28.60475311 |
| chr5 | 115480142 | 115480142 | + | 7.88E-15   | 4.45E-13   | -28.54691076 |
| chr5 | 115480144 | 115480144 | + | 0          | 0          | -30.48501414 |
| chr5 | 115480330 | 115480330 | - | 0          | 0          | -26.83989207 |
| chr5 | 115483270 | 115483270 | - | 6.34E-12   | 2.69E-10   | -28.41714847 |
| chr5 | 115508421 | 115508421 | - | 0          | 0          | -29.19707506 |
| chr5 | 115510138 | 115510138 | + | 9.23E-12   | 3.85E-10   | -29.66226456 |
| chr5 | 115520371 | 115520371 | - | 0          | 0          | -29.24110105 |
| chr5 | 115520396 | 115520396 | - | 0          | 0          | -26.08866249 |
| chr5 | 115520490 | 115520490 | - | 0          | 0          | -31.9254356  |
| chr5 | 115534467 | 115534467 | + | 0          | 0          | -32.12452232 |
| chr5 | 115534484 | 115534484 | + | 0          | 0          | -37.20212635 |
| chr5 | 115544099 | 115544099 | - | 0          | 0          | -28.88696806 |
| chr5 | 115544129 | 115544129 | - | 0          | 0          | -33.89684804 |
| chr5 | 115544461 | 115544461 | - | 0          | 0          | -45.33473036 |
| chr5 | 115544473 | 115544473 | - | 0          | 0          | -34.70341338 |
| chr5 | 115544757 | 115544757 | + | 0          | 0          | -35.56150741 |
| chr5 | 115544789 | 115544789 | + | 0          | 0          | -37.59937969 |
| chr5 | 115544790 | 115544790 | - | 0          | 0          | -39.38522437 |
| chr5 | 115544805 | 115544805 | - | 0          | 0          | -33.25265056 |
| chr5 | 115544977 | 115544977 | - | 0          | 0          | -38.91903265 |
| chr5 | 115545454 | 115545454 | + | 6.10E-09   | 1.81E-07   | -47.73614364 |
| chr5 | 115545491 | 115545491 | + | 0.00044008 | 0.00446803 | -25.23809524 |
| chr5 | 115555385 | 115555385 | - | 0          | 0          | -25.40957385 |
| chr5 | 115907608 | 115907608 | + | 2.37E-10   | 8.44E-09   | -32.52197431 |
| chr5 | 115907641 | 115907641 | + | 2.96E-09   | 9.17E-08   | -35.67489811 |
| chr5 | 116030648 | 116030648 | + | 0          | 0          | -28.42461886 |
| chr5 | 116030649 | 116030649 | - | 0          | 0          | -33.71862532 |
| chr5 | 116030653 | 116030653 | + | 0          | 0          | -33.2429889  |

|      |           |           |   |            |            |              |
|------|-----------|-----------|---|------------|------------|--------------|
| chr5 | 116030654 | 116030654 | - | 0          | 0          | -31.60185884 |
| chr5 | 116082767 | 116082767 | + | 7.77E-16   | 4.79E-14   | -25.23997741 |
| chr5 | 116409893 | 116409893 | + | 3.33E-16   | 2.11E-14   | -25.32523753 |
| chr5 | 116409995 | 116409995 | - | 0          | 0          | -37.580189   |
| chr5 | 116457188 | 116457188 | - | 6.67E-11   | 2.53E-09   | -25.13538163 |
| chr5 | 117121597 | 117121597 | - | 8.29E-07   | 1.73E-05   | -34.50996678 |
| chr5 | 117140335 | 117140335 | + | 0          | 0          | -28.39031562 |
| chr5 | 117219063 | 117219063 | + | 1.91E-12   | 8.55E-11   | -27.4538396  |
| chr5 | 117243161 | 117243161 | + | 2.22E-16   | 1.43E-14   | -26.67253853 |
| chr5 | 117274687 | 117274687 | - | 0          | 0          | -33.84529683 |
| chr5 | 117314428 | 117314428 | + | 0          | 0          | -38.44621514 |
| chr5 | 117314438 | 117314438 | + | 0          | 0          | -40.93141223 |
| chr5 | 117358438 | 117358438 | - | 7.79E-14   | 4.01E-12   | -27.7228139  |
| chr5 | 118014842 | 118014842 | + | 3.84E-07   | 8.53E-06   | -29.32806324 |
| chr5 | 118036922 | 118036922 | - | 7.83E-05   | 0.00101946 | -28.1585861  |
| chr5 | 118036924 | 118036924 | - | 1.55E-08   | 4.34E-07   | -41.31077724 |
| chr5 | 118036949 | 118036949 | - | 2.08E-07   | 4.86E-06   | -37.80207135 |
| chr5 | 118273400 | 118273400 | - | 2.54E-06   | 4.81E-05   | -35.74857486 |
| chr5 | 118297480 | 118297480 | + | 0          | 0          | -25.54123811 |
| chr5 | 118328478 | 118328478 | + | 0          | 0          | -30.67093237 |
| chr5 | 118328502 | 118328502 | + | 3.11E-15   | 1.82E-13   | -27.34362298 |
| chr5 | 118328503 | 118328503 | - | 1.89E-15   | 1.13E-13   | -25.76877181 |
| chr5 | 118344473 | 118344473 | + | 0          | 0          | -26.42612545 |
| chr5 | 118344488 | 118344488 | + | 0          | 0          | -32.17285485 |
| chr5 | 118344489 | 118344489 | - | 2.25E-06   | 4.30E-05   | -29.1413117  |
| chr5 | 118344491 | 118344491 | + | 0          | 0          | -28.08359062 |
| chr5 | 118344513 | 118344513 | - | 3.33E-16   | 2.11E-14   | -42.46543779 |
| chr5 | 118435416 | 118435416 | + | 0          | 0          | -41.67033957 |
| chr5 | 118435442 | 118435442 | + | 0          | 0          | -29.30963308 |
| chr5 | 118435463 | 118435463 | + | 0          | 0          | -26.1391844  |
| chr5 | 118435596 | 118435596 | - | 0.00055855 | 0.00545735 | -29.00912647 |
| chr5 | 118436690 | 118436690 | + | 0          | 0          | -32.05920342 |
| chr5 | 118436729 | 118436729 | + | 0          | 0          | -45.13952807 |
| chr5 | 118436792 | 118436792 | + | 0          | 0          | -41.56790921 |
| chr5 | 118436793 | 118436793 | - | 0          | 0          | -37.53075358 |
| chr5 | 118436812 | 118436812 | + | 0          | 0          | -48.12983565 |
| chr5 | 118436874 | 118436874 | - | 0          | 0          | -31.43825687 |
| chr5 | 118436884 | 118436884 | - | 0          | 0          | -40.15738949 |
| chr5 | 118436912 | 118436912 | - | 0          | 0          | -30.39468039 |
| chr5 | 118436921 | 118436921 | + | 0          | 0          | -38.49678169 |
| chr5 | 118436984 | 118436984 | - | 0          | 0          | -49.48360005 |

|      |           |           |   |            |            |              |
|------|-----------|-----------|---|------------|------------|--------------|
| chr5 | 118437004 | 118437004 | - | 0          | 0          | -55.64977258 |
| chr5 | 118437006 | 118437006 | - | 0          | 0          | -50.86093184 |
| chr5 | 118437010 | 118437010 | - | 0          | 0          | -53.03724548 |
| chr5 | 118437016 | 118437016 | + | 0          | 0          | -34.93191187 |
| chr5 | 118437017 | 118437017 | - | 0          | 0          | -43.04008062 |
| chr5 | 118437031 | 118437031 | + | 0          | 0          | -32.30760725 |
| chr5 | 118437141 | 118437141 | - | 0          | 0          | -31.89942529 |
| chr5 | 118437189 | 118437189 | - | 0          | 0          | -26.69616519 |
| chr5 | 118458872 | 118458872 | + | 0          | 0          | -28.95682215 |
| chr5 | 118458873 | 118458873 | - | 0          | 0          | -25.27439833 |
| chr5 | 118459782 | 118459782 | + | 6.22E-11   | 2.37E-09   | -31.77809388 |
| chr5 | 118514641 | 118514641 | - | 4.21E-05   | 0.0005936  | -25.90636255 |
| chr5 | 118514675 | 118514675 | + | 4.45E-06   | 7.98E-05   | -26          |
| chr5 | 118514682 | 118514682 | + | 0.00015009 | 0.00179087 | -32.02614379 |
| chr5 | 118514910 | 118514910 | - | 3.04E-07   | 6.88E-06   | -41.13193944 |
| chr5 | 118564517 | 118564517 | + | 0.00060819 | 0.00585792 | -28.33920877 |
| chr5 | 118721536 | 118721536 | - | 0          | 0          | -26.67588554 |
| chr5 | 119055608 | 119055608 | + | 0.00065137 | 0.00620205 | -27.0471464  |
| chr5 | 119408326 | 119408326 | + | 0.0001799  | 0.00209342 | 34.63005339  |
| chr5 | 119575366 | 119575366 | + | 1.95E-06   | 3.79E-05   | -34.78971963 |
| chr5 | 119588893 | 119588893 | + | 0          | 0          | -29.82725645 |
| chr5 | 119602078 | 119602078 | + | 0          | 0          | -28.21060298 |
| chr5 | 119608971 | 119608971 | + | 0          | 0          | -25.76499388 |
| chr5 | 119608986 | 119608986 | + | 0          | 0          | -28.54843289 |
| chr5 | 119608996 | 119608996 | + | 0          | 0          | -39.6263911  |
| chr5 | 119609129 | 119609129 | + | 0          | 0          | -31.06090347 |
| chr5 | 119609130 | 119609130 | - | 6.66E-16   | 4.13E-14   | -27.04173442 |
| chr5 | 119609257 | 119609257 | - | 0          | 0          | -25.24941594 |
| chr5 | 119609268 | 119609268 | + | 1.24E-06   | 2.50E-05   | -25.61834562 |
| chr5 | 119644160 | 119644160 | + | 7.71E-06   | 0.00013103 | -33.13847278 |
| chr5 | 119644307 | 119644307 | - | 0.00023141 | 0.00259523 | -30.43478261 |
| chr5 | 119651636 | 119651636 | + | 9.05E-06   | 0.00015138 | -25.5012987  |
| chr5 | 119651797 | 119651797 | - | 0          | 0          | -31.31829574 |
| chr5 | 119656077 | 119656077 | - | 1.11E-07   | 2.71E-06   | -25.80952381 |
| chr5 | 119656480 | 119656480 | + | 1.75E-09   | 5.60E-08   | -27.82288954 |
| chr5 | 119672670 | 119672670 | + | 4.27E-10   | 1.47E-08   | -25.27916004 |
| chr5 | 119687571 | 119687571 | - | 4.42E-07   | 9.72E-06   | -29.84905435 |
| chr5 | 120034887 | 120034887 | + | 3.68E-13   | 1.77E-11   | -30.91478697 |
| chr5 | 120085522 | 120085522 | - | 9.59E-06   | 0.0001594  | -34.40285205 |
| chr5 | 120097345 | 120097345 | + | 0          | 0          | -25.30255482 |
| chr5 | 120097373 | 120097373 | + | 0          | 0          | -33.09772767 |

|      |           |           |   |            |            |              |
|------|-----------|-----------|---|------------|------------|--------------|
| chr5 | 120097395 | 120097395 | + | 0          | 0          | -25.43534737 |
| chr5 | 120156756 | 120156756 | + | 0          | 0          | -31.49988507 |
| chr5 | 120156805 | 120156805 | + | 0          | 0          | -30.37853281 |
| chr5 | 120179205 | 120179205 | - | 7.92E-06   | 0.00013421 | -39.25518926 |
| chr5 | 120179215 | 120179215 | - | 2.64E-05   | 0.00039313 | -36.89806129 |
| chr5 | 120184256 | 120184256 | - | 0.00047191 | 0.00473889 | -25.16706594 |
| chr5 | 120232091 | 120232091 | + | 4.52E-07   | 9.92E-06   | -32.15442415 |
| chr5 | 120232239 | 120232239 | + | 0          | 0          | -28.88872676 |
| chr5 | 120459822 | 120459822 | + | 3.23E-08   | 8.61E-07   | -26.31252156 |
| chr5 | 120462949 | 120462949 | + | 4.03E-06   | 7.30E-05   | -28.25630252 |
| chr5 | 120462994 | 120462994 | + | 1.06E-07   | 2.59E-06   | -33.7708431  |
| chr5 | 120463215 | 120463215 | - | 0          | 0          | -27.93772861 |
| chr5 | 120463217 | 120463217 | - | 0          | 0          | -39.14805954 |
| chr5 | 120476385 | 120476385 | + | 0          | 0          | -29.14900185 |
| chr5 | 120476386 | 120476386 | - | 0          | 0          | -28.47224444 |
| chr5 | 120476405 | 120476405 | + | 0          | 0          | -31.61814453 |
| chr5 | 120476406 | 120476406 | - | 0          | 0          | -31.35540664 |
| chr5 | 120476432 | 120476432 | + | 0          | 0          | -28.66062769 |
| chr5 | 120476595 | 120476595 | + | 0          | 0          | -25.905785   |
| chr5 | 120562965 | 120562965 | + | 1.03E-05   | 0.00017052 | -47.22222222 |
| chr5 | 120565810 | 120565810 | - | 3.13E-06   | 5.81E-05   | -37.70433547 |
| chr5 | 120574888 | 120574888 | + | 0          | 0          | -27.77184253 |
| chr5 | 120586793 | 120586793 | + | 0          | 0          | -26.82562847 |
| chr5 | 120586845 | 120586845 | - | 0          | 0          | -25.28959008 |
| chr5 | 120606737 | 120606737 | + | 5.23E-06   | 9.25E-05   | -32.90361446 |
| chr5 | 120606738 | 120606738 | - | 0          | 0          | -31.06567346 |
| chr5 | 120606742 | 120606742 | + | 3.16E-06   | 5.86E-05   | -34.36807095 |
| chr5 | 120606748 | 120606748 | + | 1.09E-06   | 2.22E-05   | -29.1347207  |
| chr5 | 120662200 | 120662200 | - | 0.00014275 | 0.00171507 | -28.57546637 |
| chr5 | 120688941 | 120688941 | - | 2.33E-15   | 1.38E-13   | -25.12956811 |
| chr5 | 121401863 | 121401863 | + | 3.47E-07   | 7.77E-06   | -29.25170068 |
| chr5 | 121471846 | 121471846 | + | 0          | 0          | -25.14698985 |
| chr5 | 121471847 | 121471847 | - | 0          | 0          | -27.20281462 |
| chr5 | 121471888 | 121471888 | - | 0          | 0          | -33.32673619 |
| chr5 | 121854936 | 121854936 | + | 0          | 0          | -25.14936233 |
| chr5 | 122048475 | 122048475 | + | 1.15E-14   | 6.42E-13   | -26.39277933 |
| chr5 | 122104992 | 122104992 | + | 0.00019484 | 0.0022408  | -30.83333333 |
| chr5 | 122154444 | 122154444 | + | 1.35E-12   | 6.13E-11   | -29.27884615 |
| chr5 | 122291678 | 122291678 | + | 4.61E-05   | 0.00064317 | -31.02941176 |
| chr5 | 122336666 | 122336666 | - | 3.78E-13   | 1.82E-11   | -27.91237113 |
| chr5 | 122650226 | 122650226 | + | 7.99E-15   | 4.51E-13   | -30.6002675  |

|      |           |           |   |            |            |              |
|------|-----------|-----------|---|------------|------------|--------------|
| chr5 | 122733782 | 122733782 | - | 3.44E-05   | 0.00049654 | -40.30982202 |
| chr5 | 122735847 | 122735847 | - | 1.49E-08   | 4.18E-07   | -44.27432217 |
| chr5 | 122761070 | 122761070 | + | 2.41E-06   | 4.59E-05   | -39.03079494 |
| chr5 | 122774949 | 122774949 | - | 5.28E-11   | 2.03E-09   | -39.23076923 |
| chr5 | 122774954 | 122774954 | - | 2.09E-10   | 7.49E-09   | -38.45714286 |
| chr5 | 122774971 | 122774971 | - | 7.18E-06   | 0.00012299 | -26.05633803 |
| chr5 | 122911504 | 122911504 | - | 2.55E-05   | 0.00038119 | -37.13043478 |
| chr5 | 122986036 | 122986036 | + | 1.22E-07   | 2.96E-06   | -31.03148542 |
| chr5 | 122986084 | 122986084 | + | 1.28E-09   | 4.15E-08   | -29.5436664  |
| chr5 | 122986192 | 122986192 | - | 7.26E-08   | 1.83E-06   | -37.70897833 |
| chr5 | 122986230 | 122986230 | - | 0.00015389 | 0.00182979 | -28.94117647 |
| chr5 | 123060421 | 123060421 | + | 0          | 0          | -36.32522407 |
| chr5 | 123060466 | 123060466 | + | 0          | 0          | -31.5171231  |
| chr5 | 123060467 | 123060467 | - | 0          | 0          | -40.75871683 |
| chr5 | 123077222 | 123077222 | - | 7.67E-09   | 2.24E-07   | -26.62144703 |
| chr5 | 123115210 | 123115210 | - | 0          | 0          | -25.18291244 |
| chr5 | 123133151 | 123133151 | - | 0          | 0          | -27.37350198 |
| chr5 | 123135377 | 123135377 | + | 3.63E-05   | 0.00051999 | -27.93952968 |
| chr5 | 123174309 | 123174309 | - | 0.00020741 | 0.00236371 | -33.33333333 |
| chr5 | 123346890 | 123346890 | - | 0          | 0          | -26.41630246 |
| chr5 | 123488133 | 123488133 | + | 0.00010896 | 0.00135738 | -38.0952381  |
| chr5 | 123501418 | 123501418 | + | 0.00011491 | 0.00142073 | -29.58107294 |
| chr5 | 123603625 | 123603625 | - | 0          | 0          | -26.47404401 |
| chr5 | 123646094 | 123646094 | - | 0          | 0          | -29.18615826 |
| chr5 | 123842387 | 123842387 | + | 0          | 0          | -25.7545339  |
| chr5 | 124089712 | 124089712 | - | 5.01E-08   | 1.29E-06   | -31.85420957 |
| chr5 | 124120568 | 124120568 | + | 0          | 0          | -35.28174516 |
| chr5 | 124120605 | 124120605 | - | 0          | 0          | -27.78676821 |
| chr5 | 124162857 | 124162857 | - | 5.18E-13   | 2.46E-11   | -29.68982405 |
| chr5 | 124192873 | 124192873 | - | 7.75E-11   | 2.92E-09   | -34.03037558 |
| chr5 | 124213882 | 124213882 | + | 0          | 0          | -48.32785568 |
| chr5 | 124213921 | 124213921 | + | 0          | 0          | -38.98746201 |
| chr5 | 124213922 | 124213922 | - | 0          | 0          | -36.0628314  |
| chr5 | 124214096 | 124214096 | - | 0          | 0          | -28.75929595 |
| chr5 | 124215350 | 124215350 | + | 0          | 0          | -46.47938832 |
| chr5 | 124215373 | 124215373 | + | 0          | 0          | -30.46174058 |
| chr5 | 124215430 | 124215430 | - | 8.52E-09   | 2.47E-07   | -35.91891892 |
| chr5 | 124218961 | 124218961 | + | 8.27E-05   | 0.00106909 | -33.17829457 |
| chr5 | 124219178 | 124219178 | + | 0          | 0          | -34.19498799 |
| chr5 | 124219179 | 124219179 | - | 3.12E-11   | 1.23E-09   | -29.27997025 |
| chr5 | 124219215 | 124219215 | + | 0          | 0          | -25.68457438 |

|      |           |           |   |            |            |              |
|------|-----------|-----------|---|------------|------------|--------------|
| chr5 | 124219216 | 124219216 | - | 0          | 0          | -30.26607725 |
| chr5 | 124219221 | 124219221 | + | 0          | 0          | -29.9205373  |
| chr5 | 124219222 | 124219222 | - | 0          | 0          | -33.10186151 |
| chr5 | 124219239 | 124219239 | + | 0          | 0          | -47.98902648 |
| chr5 | 124219240 | 124219240 | - | 0          | 0          | -32.48012472 |
| chr5 | 124528889 | 124528889 | - | 0          | 0          | -28.58496132 |
| chr5 | 124529533 | 124529533 | - | 0          | 0          | -26.5992713  |
| chr5 | 124531859 | 124531859 | - | 0          | 0          | -25.8984127  |
| chr5 | 124532613 | 124532613 | + | 0          | 0          | -30.81960948 |
| chr5 | 124608178 | 124608178 | + | 8.36E-07   | 1.75E-05   | -42.49834765 |
| chr5 | 124623200 | 124623200 | - | 2.72E-12   | 1.20E-10   | -28.54651163 |
| chr5 | 124863858 | 124863858 | - | 1.47E-09   | 4.73E-08   | -30.49004997 |
| chr5 | 124963930 | 124963930 | + | 1.18E-13   | 5.96E-12   | -27.95348529 |
| chr5 | 124964496 | 124964496 | - | 0.00040294 | 0.0041497  | -36.9047619  |
| chr5 | 125017495 | 125017495 | - | 1.27E-13   | 6.38E-12   | -39.13516723 |
| chr5 | 125040089 | 125040089 | + | 6.56E-09   | 1.93E-07   | -29.92105263 |
| chr5 | 125053411 | 125053411 | - | 0          | 0          | -25.68681638 |
| chr5 | 125068459 | 125068459 | + | 2.14E-12   | 9.56E-11   | -38.87185246 |
| chr5 | 125068722 | 125068722 | + | 0          | 0          | -30.22128799 |
| chr5 | 125068875 | 125068875 | + | 1.16E-08   | 3.29E-07   | -34.33664524 |
| chr5 | 125075296 | 125075296 | - | 0          | 0          | -28.28530084 |
| chr5 | 125131407 | 125131407 | - | 0          | 0          | -28.53254278 |
| chr5 | 125131447 | 125131447 | + | 0          | 0          | -39.43424692 |
| chr5 | 125131578 | 125131578 | + | 1.29E-10   | 4.73E-09   | -27.08350473 |
| chr5 | 125134905 | 125134905 | + | 0          | 0          | -29.37075948 |
| chr5 | 125148826 | 125148826 | + | 0          | 0          | -27.38167317 |
| chr5 | 125148827 | 125148827 | - | 0.00026054 | 0.00287253 | -27.72486772 |
| chr5 | 125152024 | 125152024 | - | 0          | 0          | -32.52974298 |
| chr5 | 125191794 | 125191794 | - | 7.77E-16   | 4.79E-14   | -26.45415982 |
| chr5 | 125191835 | 125191835 | - | 2.00E-15   | 1.19E-13   | -26.66190503 |
| chr5 | 125245275 | 125245275 | + | 2.68E-07   | 6.14E-06   | -58.66873065 |
| chr5 | 125284516 | 125284516 | + | 0.00108172 | 0.00941473 | -28.5669587  |
| chr5 | 125402914 | 125402914 | - | 0          | 0          | -34.77449243 |
| chr5 | 125402916 | 125402916 | + | 0          | 0          | -25.44506393 |
| chr5 | 125402917 | 125402917 | - | 0          | 0          | -37.3692627  |
| chr5 | 125402943 | 125402943 | + | 0          | 0          | -31.77536071 |
| chr5 | 125402944 | 125402944 | - | 0          | 0          | -29.84418401 |
| chr5 | 125403917 | 125403917 | + | 0          | 0          | -30.2107699  |
| chr5 | 125403978 | 125403978 | - | 0          | 0          | -28.92157954 |
| chr5 | 125403998 | 125403998 | - | 0          | 0          | -29.42384746 |
| chr5 | 125409450 | 125409450 | + | 0          | 0          | -25.55636349 |

|      |           |           |   |            |            |              |
|------|-----------|-----------|---|------------|------------|--------------|
| chr5 | 125409495 | 125409495 | + | 0          | 0          | -31.6314224  |
| chr5 | 125410034 | 125410034 | - | 0          | 0          | -28.04388158 |
| chr5 | 125529699 | 125529699 | + | 4.42E-07   | 9.72E-06   | -26.66666667 |
| chr5 | 125529713 | 125529713 | + | 2.34E-06   | 4.47E-05   | -30.49279488 |
| chr5 | 128527121 | 128527121 | + | 2.71E-06   | 5.12E-05   | -30.26315789 |
| chr5 | 128684142 | 128684142 | + | 2.18E-05   | 0.00033175 | -43.47826087 |
| chr5 | 129006213 | 129006213 | + | 0          | 0          | -40.90909091 |
| chr5 | 129006219 | 129006219 | + | 1.55E-15   | 9.35E-14   | -36.34530792 |
| chr5 | 129006228 | 129006228 | + | 2.12E-09   | 6.68E-08   | -29.54284071 |
| chr5 | 129006234 | 129006234 | + | 0          | 0          | -43.16239316 |
| chr5 | 129006382 | 129006382 | - | 0          | 0          | -36.21050935 |
| chr5 | 129006386 | 129006386 | + | 0          | 0          | -40.4425433  |
| chr5 | 129006387 | 129006387 | - | 0          | 0          | -43.50024146 |
| chr5 | 129006404 | 129006404 | + | 0          | 0          | -31.58141526 |
| chr5 | 129064352 | 129064352 | - | 0          | 0          | -26.28620056 |
| chr5 | 129102235 | 129102235 | + | 0          | 0          | -34.58925051 |
| chr5 | 129104102 | 129104102 | - | 2.00E-10   | 7.19E-09   | -32.65038714 |
| chr5 | 129235354 | 129235354 | - | 0          | 0          | -30.43613631 |
| chr5 | 129268750 | 129268750 | - | 3.33E-15   | 1.95E-13   | -25.99726428 |
| chr5 | 129717240 | 129717240 | + | 1.08E-09   | 3.54E-08   | -28.76185153 |
| chr5 | 129886414 | 129886414 | - | 4.73E-05   | 0.00065772 | -42.40591398 |
| chr5 | 129887724 | 129887724 | + | 5.35E-05   | 0.00073168 | -35.72530864 |
| chr5 | 129997910 | 129997910 | + | 1.36E-11   | 5.57E-10   | -28.73333333 |
| chr5 | 134215667 | 134215667 | + | 0.00106866 | 0.00932176 | -35.82608696 |
| chr5 | 134222015 | 134222015 | + | 0          | 0          | -25.17778149 |
| chr5 | 134222016 | 134222016 | - | 0          | 0          | -28.04972602 |
| chr5 | 134222023 | 134222023 | + | 0          | 0          | -29.00818627 |
| chr5 | 134222024 | 134222024 | - | 0          | 0          | -35.67363226 |
| chr5 | 134222071 | 134222071 | + | 0          | 0          | -25.08483186 |
| chr5 | 134222077 | 134222077 | + | 0          | 0          | -26.14786494 |
| chr5 | 134222092 | 134222092 | + | 0          | 0          | -35.19570077 |
| chr5 | 134222104 | 134222104 | + | 0          | 0          | -37.14623182 |
| chr5 | 134222107 | 134222107 | + | 0          | 0          | -26.852171   |
| chr5 | 134222160 | 134222160 | - | 0          | 0          | -34.0011802  |
| chr5 | 134222165 | 134222165 | - | 0          | 0          | -27.31323247 |
| chr5 | 134226683 | 134226683 | + | 5.90E-14   | 3.07E-12   | -31.52717015 |
| chr5 | 134468314 | 134468314 | - | 0.00020226 | 0.00231362 | -43.24116743 |
| chr5 | 134756057 | 134756057 | + | 6.25E-05   | 0.00083894 | -30.56982147 |
| chr5 | 134756340 | 134756340 | + | 0          | 0          | -33.8674353  |
| chr5 | 134756341 | 134756341 | - | 0          | 0          | -38.10297407 |
| chr5 | 134756348 | 134756348 | + | 0          | 0          | -26.1827139  |

|      |           |           |   |          |            |              |
|------|-----------|-----------|---|----------|------------|--------------|
| chr5 | 134756398 | 134756398 | - | 0        | 0          | -25.75103758 |
| chr5 | 134786216 | 134786216 | - | 0        | 0          | -29.37609817 |
| chr5 | 134945598 | 134945598 | + | 3.02E-11 | 1.19E-09   | -28.30327955 |
| chr5 | 134945918 | 134945918 | + | 0        | 0          | -30.62425925 |
| chr5 | 134945919 | 134945919 | - | 0        | 0          | -30.49332127 |
| chr5 | 134945922 | 134945922 | + | 0        | 0          | -26.09307359 |
| chr5 | 134945978 | 134945978 | + | 2.32E-08 | 6.31E-07   | -26.37492942 |
| chr5 | 134945979 | 134945979 | - | 0        | 0          | -28.67487179 |
| chr5 | 134946232 | 134946232 | + | 0        | 0          | -35.293644   |
| chr5 | 134946233 | 134946233 | - | 1.85E-08 | 5.11E-07   | -31.25       |
| chr5 | 134946239 | 134946239 | + | 0        | 0          | -34.66546802 |
| chr5 | 134946240 | 134946240 | - | 0        | 0          | -30.33766234 |
| chr5 | 134946247 | 134946247 | + | 0        | 0          | -32.35755973 |
| chr5 | 134946248 | 134946248 | - | 0        | 0          | -29.66000081 |
| chr5 | 134946250 | 134946250 | + | 0        | 0          | -32.2954823  |
| chr5 | 134946251 | 134946251 | - | 0        | 0          | -34.65655706 |
| chr5 | 134946257 | 134946257 | + | 0        | 0          | -37.08005359 |
| chr5 | 134946258 | 134946258 | - | 0        | 0          | -35.89934928 |
| chr5 | 134946283 | 134946283 | + | 0        | 0          | -32.54571332 |
| chr5 | 134946284 | 134946284 | - | 0        | 0          | -29.86317011 |
| chr5 | 134946310 | 134946310 | + | 0        | 0          | -48.27117436 |
| chr5 | 134946312 | 134946312 | + | 0        | 0          | -33.52245547 |
| chr5 | 134946319 | 134946319 | + | 0        | 0          | -42.19607843 |
| chr5 | 134946328 | 134946328 | + | 0        | 0          | -34.12542336 |
| chr5 | 134946341 | 134946341 | - | 0        | 0          | -33.06636156 |
| chr5 | 134946368 | 134946368 | - | 1.11E-16 | 7.26E-15   | -26.42728656 |
| chr5 | 134946377 | 134946377 | - | 0        | 0          | -27.33576378 |
| chr5 | 134946383 | 134946383 | - | 0        | 0          | -25.72551957 |
| chr5 | 134947003 | 134947003 | + | 4.44E-15 | 2.57E-13   | -40.05550416 |
| chr5 | 134947016 | 134947016 | + | 5.92E-14 | 3.08E-12   | -38.16425121 |
| chr5 | 134947201 | 134947201 | + | 0        | 0          | -32.54875206 |
| chr5 | 134947202 | 134947202 | - | 0        | 0          | -36.11990669 |
| chr5 | 134961231 | 134961231 | - | 0        | 0          | -27.63133001 |
| chr5 | 134981443 | 134981443 | + | 0        | 0          | -26.28972843 |
| chr5 | 135012771 | 135012771 | + | 0        | 0          | -34.73141384 |
| chr5 | 135039776 | 135039776 | - | 1.55E-05 | 0.00024516 | -47.90919952 |
| chr5 | 135040004 | 135040004 | + | 2.10E-13 | 1.04E-11   | -27.39759036 |
| chr5 | 135073795 | 135073795 | - | 0        | 0          | -27.81663012 |
| chr5 | 135073807 | 135073807 | - | 0        | 0          | -25.89480367 |
| chr5 | 135073834 | 135073834 | + | 9.99E-16 | 6.10E-14   | -31.91097308 |
| chr5 | 135073835 | 135073835 | - | 5.55E-16 | 3.46E-14   | -25.62533904 |



|      |           |           |   |            |            |              |
|------|-----------|-----------|---|------------|------------|--------------|
| chr5 | 135073853 | 135073853 | + | 2.42E-12   | 1.07E-10   | -31.66015307 |
| chr5 | 135100664 | 135100664 | + | 0          | 0          | -25.83014237 |
| chr5 | 135133277 | 135133277 | - | 0          | 0          | -25.84316204 |
| chr5 | 135168073 | 135168073 | - | 0.00054276 | 0.00532856 | -25.86399108 |
| chr5 | 135252843 | 135252843 | - | 3.90E-07   | 8.65E-06   | -32.51096491 |
| chr5 | 135254198 | 135254198 | + | 0          | 0          | -26.55158509 |
| chr5 | 135254224 | 135254224 | + | 0          | 0          | -33.07842363 |
| chr5 | 135254225 | 135254225 | - | 0          | 0          | -33.71182513 |
| chr5 | 135254256 | 135254256 | - | 0          | 0          | -37.83554366 |
| chr5 | 135276624 | 135276624 | + | 0          | 0          | -48.47652024 |
| chr5 | 135276629 | 135276629 | + | 0          | 0          | -49.16384493 |
| chr5 | 135276630 | 135276630 | - | 0          | 0          | -52.19745104 |
| chr5 | 135276650 | 135276650 | + | 0          | 0          | -42.9233994  |
| chr5 | 135276651 | 135276651 | - | 0          | 0          | -41.48162393 |
| chr5 | 135276656 | 135276656 | + | 0          | 0          | -51.36501114 |
| chr5 | 135276657 | 135276657 | - | 0          | 0          | -55.33552294 |
| chr5 | 135276662 | 135276662 | + | 0          | 0          | -60.86918734 |
| chr5 | 135276663 | 135276663 | - | 0          | 0          | -58.66995353 |
| chr5 | 135276669 | 135276669 | + | 0          | 0          | -45.68535939 |
| chr5 | 135276670 | 135276670 | - | 0          | 0          | -48.73126747 |
| chr5 | 135276672 | 135276672 | + | 0          | 0          | -27.42783953 |
| chr5 | 135276673 | 135276673 | - | 0          | 0          | -42.47568052 |
| chr5 | 135276678 | 135276678 | + | 0          | 0          | -61.29429892 |
| chr5 | 135276688 | 135276688 | + | 0          | 0          | -45.24617115 |
| chr5 | 135276690 | 135276690 | + | 0          | 0          | -39.24014924 |
| chr5 | 135276696 | 135276696 | + | 0          | 0          | -61.32502757 |
| chr5 | 135276699 | 135276699 | + | 0          | 0          | -37.35791091 |
| chr5 | 135276704 | 135276704 | + | 0          | 0          | -49.33333333 |
| chr5 | 135276706 | 135276706 | + | 0          | 0          | -52.42796559 |
| chr5 | 135276712 | 135276712 | + | 0          | 0          | -63.79110554 |
| chr5 | 135276746 | 135276746 | - | 0          | 0          | -48.64492659 |
| chr5 | 135276752 | 135276752 | - | 0          | 0          | -43.24561404 |
| chr5 | 135276755 | 135276755 | - | 0          | 0          | -60.79766308 |
| chr5 | 135276767 | 135276767 | - | 0          | 0          | -57.75435254 |
| chr5 | 135276794 | 135276794 | - | 0          | 0          | -38.19212969 |
| chr5 | 135375329 | 135375329 | - | 0          | 0          | -25.018457   |
| chr5 | 135489975 | 135489975 | + | 0          | 0          | -26.673517   |
| chr5 | 135490084 | 135490084 | + | 0          | 0          | -25.42747411 |
| chr5 | 135490085 | 135490085 | - | 0          | 0          | -30.00935413 |
| chr5 | 135658112 | 135658112 | - | 0          | 0          | -26.67675531 |
| chr5 | 135712384 | 135712384 | + | 5.77E-06   | 0.00010108 | -34.0035482  |

|      |           |           |   |            |            |              |
|------|-----------|-----------|---|------------|------------|--------------|
| chr5 | 135712412 | 135712412 | + | 7.37E-05   | 0.00096766 | -29.94505495 |
| chr5 | 135832716 | 135832716 | + | 0.00011255 | 0.00139574 | 26.08695652  |
| chr5 | 135869235 | 135869235 | - | 0          | 0          | -26.20810218 |
| chr5 | 135874682 | 135874682 | - | 7.05E-06   | 0.00012084 | -28.45238095 |
| chr5 | 135903279 | 135903279 | + | 0          | 0          | -27.83802428 |
| chr5 | 135967933 | 135967933 | + | 1.67E-08   | 4.63E-07   | -29.08912189 |
| chr5 | 136030327 | 136030327 | + | 0          | 0          | -33.31293911 |
| chr5 | 136030352 | 136030352 | + | 0          | 0          | -31.1706586  |
| chr5 | 136132108 | 136132108 | - | 1.12E-05   | 0.00018245 | -44          |
| chr5 | 136237501 | 136237501 | + | 6.66E-16   | 4.13E-14   | -28.60734037 |
| chr5 | 136581216 | 136581216 | + | 1.87E-12   | 8.42E-11   | -38.83525382 |
| chr5 | 136582590 | 136582590 | - | 0          | 0          | -33.58358358 |
| chr5 | 136585092 | 136585092 | + | 0          | 0          | -32.78952654 |
| chr5 | 136585122 | 136585122 | + | 0          | 0          | -28.12215767 |
| chr5 | 136585123 | 136585123 | - | 0          | 0          | -29.5218035  |
| chr5 | 136585144 | 136585144 | - | 0          | 0          | -28.19712837 |
| chr5 | 136609057 | 136609057 | + | 1.07E-08   | 3.05E-07   | -37.45098039 |
| chr5 | 136619712 | 136619712 | - | 0.0002343  | 0.00262297 | -30.21680217 |
| chr5 | 136619754 | 136619754 | + | 0.00041246 | 0.00423166 | -33.02304965 |
| chr5 | 136620047 | 136620047 | + | 0          | 0          | -40.78756006 |
| chr5 | 136620048 | 136620048 | - | 0          | 0          | -43.27479802 |
| chr5 | 136670918 | 136670918 | + | 0          | 0          | -25.04157995 |
| chr5 | 136870147 | 136870147 | - | 0.00082921 | 0.0075714  | -35.83583584 |
| chr5 | 136966230 | 136966230 | - | 8.18E-07   | 1.71E-05   | -30.7775524  |
| chr5 | 136966280 | 136966280 | - | 3.56E-05   | 0.00051177 | -26.74418605 |
| chr5 | 137189797 | 137189797 | - | 0.00075051 | 0.00697166 | -31.66023166 |
| chr5 | 137211309 | 137211309 | + | 0          | 0          | -27.23253758 |
| chr5 | 137315312 | 137315312 | + | 0          | 0          | -30.85677749 |
| chr5 | 137315339 | 137315339 | + | 0          | 0          | -33.11965812 |
| chr5 | 137315470 | 137315470 | - | 0          | 0          | -25.83247153 |
| chr5 | 137315476 | 137315476 | - | 0          | 0          | -31.93502637 |
| chr5 | 137339914 | 137339914 | - | 7.78E-07   | 1.63E-05   | -32.16409944 |
| chr5 | 137339918 | 137339918 | - | 1.08E-08   | 3.08E-07   | -39.62668299 |
| chr5 | 137339922 | 137339922 | - | 2.70E-06   | 5.10E-05   | -28.1536447  |
| chr5 | 137339963 | 137339963 | + | 1.59E-06   | 3.15E-05   | -48.7012987  |
| chr5 | 137347985 | 137347985 | + | 0          | 0          | -39.61839017 |
| chr5 | 137348043 | 137348043 | - | 0          | 0          | -30.29817495 |
| chr5 | 137485750 | 137485750 | - | 9.04E-08   | 2.24E-06   | -28.15522388 |
| chr5 | 137485752 | 137485752 | - | 3.22E-09   | 9.92E-08   | -28.54239257 |
| chr5 | 137584052 | 137584052 | - | 2.71E-11   | 1.07E-09   | -46.4957265  |
| chr5 | 137584076 | 137584076 | - | 1.00E-09   | 3.30E-08   | -38.57804704 |

|      |           |           |   |            |            |              |
|------|-----------|-----------|---|------------|------------|--------------|
| chr5 | 137608359 | 137608359 | + | 0          | 0          | -38.18763124 |
| chr5 | 137608363 | 137608363 | + | 0          | 0          | -32.57653061 |
| chr5 | 137608403 | 137608403 | + | 0          | 0          | -45.88326156 |
| chr5 | 137608471 | 137608471 | + | 0          | 0          | -40.91735257 |
| chr5 | 137608472 | 137608472 | - | 0          | 0          | -39.59621601 |
| chr5 | 137608490 | 137608490 | + | 0          | 0          | -37.81712232 |
| chr5 | 137608491 | 137608491 | - | 0          | 0          | -36.61192148 |
| chr5 | 137608496 | 137608496 | + | 0          | 0          | -37.87640924 |
| chr5 | 137608497 | 137608497 | - | 0          | 0          | -41.10791661 |
| chr5 | 137608527 | 137608527 | - | 0          | 0          | -33.07624445 |
| chr5 | 137608733 | 137608733 | + | 0          | 0          | -36.81682571 |
| chr5 | 137608754 | 137608754 | + | 0          | 0          | -34.55871596 |
| chr5 | 137608846 | 137608846 | + | 0          | 0          | -32.19658432 |
| chr5 | 137608847 | 137608847 | - | 4.83E-12   | 2.08E-10   | -39.13339825 |
| chr5 | 137608899 | 137608899 | - | 0          | 0          | -35.15393308 |
| chr5 | 137608908 | 137608908 | + | 0          | 0          | -46.70588235 |
| chr5 | 137608909 | 137608909 | - | 0          | 0          | -38.08266823 |
| chr5 | 137608912 | 137608912 | + | 0          | 0          | -32.20899633 |
| chr5 | 137608913 | 137608913 | - | 0          | 0          | -33.09488113 |
| chr5 | 137608935 | 137608935 | + | 0          | 0          | -40.32476651 |
| chr5 | 137608936 | 137608936 | - | 0          | 0          | -40.03527337 |
| chr5 | 137608943 | 137608943 | - | 0          | 0          | -36.17052601 |
| chr5 | 137632598 | 137632598 | - | 0          | 0          | -25.31895145 |
| chr5 | 137640004 | 137640004 | + | 0.00022755 | 0.00255802 | -25.42656407 |
| chr5 | 137640153 | 137640153 | - | 0          | 0          | -30.88162021 |
| chr5 | 137640201 | 137640201 | + | 0.00060745 | 0.00585235 | -25.62358277 |
| chr5 | 137640202 | 137640202 | - | 0          | 0          | -39.30031993 |
| chr5 | 137640314 | 137640314 | - | 0          | 0          | -27.16184195 |
| chr5 | 137640324 | 137640324 | - | 0          | 0          | -25.63877915 |
| chr5 | 137641236 | 137641236 | + | 4.46E-11   | 1.73E-09   | -32.8125     |
| chr5 | 137645593 | 137645593 | - | 0          | 0          | -33.82777879 |
| chr5 | 137740653 | 137740653 | - | 0          | 0          | -35.59546465 |
| chr5 | 138272545 | 138272545 | + | 4.22E-14   | 2.23E-12   | -25.56578479 |
| chr5 | 138272546 | 138272546 | - | 0          | 0          | -26.07663758 |
| chr5 | 138272556 | 138272556 | + | 0          | 0          | -28.11658777 |
| chr5 | 138272787 | 138272787 | + | 3.41E-11   | 1.34E-09   | -26.32822992 |
| chr5 | 138272861 | 138272861 | - | 0          | 0          | -32.69203333 |
| chr5 | 138820164 | 138820164 | + | 0          | 0          | -26.13391137 |
| chr5 | 138820165 | 138820165 | - | 0          | 0          | -27.77133218 |
| chr5 | 138820181 | 138820181 | - | 0          | 0          | -25.30704554 |
| chr5 | 138934326 | 138934326 | + | 6.76E-13   | 3.17E-11   | -28.42496476 |

|      |           |           |   |            |            |              |
|------|-----------|-----------|---|------------|------------|--------------|
| chr5 | 138953024 | 138953024 | - | 0          | 0          | -33.73671472 |
| chr5 | 139018548 | 139018548 | + | 6.30E-09   | 1.86E-07   | -25.59451956 |
| chr5 | 139018559 | 139018559 | + | 6.79E-13   | 3.19E-11   | -31.29643555 |
| chr5 | 139034056 | 139034056 | - | 0          | 0          | -27.48434797 |
| chr5 | 139075985 | 139075985 | - | 3.11E-05   | 0.00045453 | -28.23860727 |
| chr5 | 139174129 | 139174129 | + | 8.68E-05   | 0.0011156  | -26.74050633 |
| chr5 | 139356851 | 139356851 | + | 0          | 0          | -33.88478015 |
| chr5 | 139356859 | 139356859 | + | 0          | 0          | -39.16591442 |
| chr5 | 139356901 | 139356901 | + | 0          | 0          | -41.81712272 |
| chr5 | 139356902 | 139356902 | - | 0          | 0          | -43.80875323 |
| chr5 | 139356924 | 139356924 | - | 0          | 0          | -34.26448199 |
| chr5 | 139356941 | 139356941 | - | 0          | 0          | -28.61083336 |
| chr5 | 139405726 | 139405726 | - | 0          | 0          | -33.2642209  |
| chr5 | 139419177 | 139419177 | + | 0          | 0          | -28.52320675 |
| chr5 | 139538154 | 139538154 | + | 0          | 0          | -25.01112215 |
| chr5 | 139538155 | 139538155 | - | 0          | 0          | -29.33496363 |
| chr5 | 139619670 | 139619670 | + | 0          | 0          | -28.00952998 |
| chr5 | 139619671 | 139619671 | - | 1.11E-15   | 6.76E-14   | -30.07793255 |
| chr5 | 139723174 | 139723174 | + | 4.43E-05   | 0.0006208  | -28.65168539 |
| chr5 | 139755037 | 139755037 | + | 0          | 0          | -34.79688716 |
| chr5 | 139755064 | 139755064 | + | 0          | 0          | -41.91780822 |
| chr5 | 139755068 | 139755068 | + | 0          | 0          | -39.18916828 |
| chr5 | 139755083 | 139755083 | + | 0          | 0          | -28.51644842 |
| chr5 | 139910616 | 139910616 | - | 0          | 0          | -25.6887564  |
| chr5 | 139966495 | 139966495 | - | 0.00037347 | 0.00389535 | -30.28846154 |
| chr5 | 140509443 | 140509443 | - | 4.67E-07   | 1.02E-05   | -31.70469076 |
| chr5 | 140509455 | 140509455 | - | 9.54E-10   | 3.16E-08   | -38.13648294 |
| chr5 | 140510501 | 140510501 | + | 0          | 0          | -26.41332651 |
| chr5 | 140543348 | 140543348 | - | 5.11E-12   | 2.19E-10   | -27.60121658 |
| chr5 | 140543396 | 140543396 | - | 1.83E-13   | 9.10E-12   | -26.75594951 |
| chr5 | 140549896 | 140549896 | + | 0          | 0          | -33.72015246 |
| chr5 | 140549997 | 140549997 | - | 3.33E-16   | 2.11E-14   | -32.31119606 |
| chr5 | 140550006 | 140550006 | - | 0          | 0          | -42.41336435 |
| chr5 | 140606272 | 140606272 | + | 0          | 0          | -39.18074287 |
| chr5 | 140606302 | 140606302 | + | 0          | 0          | -38.8021338  |
| chr5 | 140606406 | 140606406 | - | 0          | 0          | -33.13391863 |
| chr5 | 140606426 | 140606426 | - | 0          | 0          | -32.93147136 |
| chr5 | 140701210 | 140701210 | - | 0          | 0          | -31.0017362  |
| chr5 | 140872277 | 140872277 | + | 0          | 0          | -41.66931638 |
| chr5 | 140890815 | 140890815 | + | 6.11E-15   | 3.49E-13   | -30.05080575 |
| chr5 | 140970437 | 140970437 | - | 0          | 0          | -28.76659431 |

|      |           |           |   |            |            |              |
|------|-----------|-----------|---|------------|------------|--------------|
| chr5 | 140970476 | 140970476 | - | 0          | 0          | -31.75908842 |
| chr5 | 142395992 | 142395992 | + | 4.41E-11   | 1.71E-09   | -35.49697238 |
| chr5 | 142416441 | 142416441 | + | 0          | 0          | -26.89053786 |
| chr5 | 142416544 | 142416544 | - | 0          | 0          | -28.24887531 |
| chr5 | 142416552 | 142416552 | - | 0          | 0          | -25.26027296 |
| chr5 | 142457840 | 142457840 | + | 0          | 0          | -28.17172931 |
| chr5 | 142457851 | 142457851 | + | 0          | 0          | -27.86337994 |
| chr5 | 142457889 | 142457889 | + | 0          | 0          | -29.72062972 |
| chr5 | 142457890 | 142457890 | - | 0          | 0          | -33.41003677 |
| chr5 | 142457915 | 142457915 | - | 0          | 0          | -27.01936237 |
| chr5 | 142458162 | 142458162 | - | 4.16E-08   | 1.09E-06   | -34.51096728 |
| chr5 | 142529990 | 142529990 | - | 3.62E-10   | 1.26E-08   | -64          |
| chr5 | 142812767 | 142812767 | + | 0          | 0          | -55.16060463 |
| chr5 | 142812811 | 142812811 | + | 1.25E-07   | 3.01E-06   | -35.09803922 |
| chr5 | 142812828 | 142812828 | - | 0          | 0          | -36.46135266 |
| chr5 | 142812874 | 142812874 | - | 0          | 0          | -43.43924684 |
| chr5 | 142812881 | 142812881 | + | 0          | 0          | -43.25899014 |
| chr5 | 142813022 | 142813022 | - | 0          | 0          | -35.87893684 |
| chr5 | 142813033 | 142813033 | + | 0          | 0          | -27.30627092 |
| chr5 | 142813034 | 142813034 | - | 0          | 0          | -30.30911356 |
| chr5 | 142813060 | 142813060 | + | 0          | 0          | -42.64069264 |
| chr5 | 142813081 | 142813081 | + | 0          | 0          | -37.80739423 |
| chr5 | 142813082 | 142813082 | - | 0          | 0          | -37.28706625 |
| chr5 | 142813108 | 142813108 | - | 0          | 0          | -30.74476422 |
| chr5 | 142813113 | 142813113 | - | 0          | 0          | -31.586813   |
| chr5 | 142813892 | 142813892 | - | 0          | 0          | -43.72139588 |
| chr5 | 142813917 | 142813917 | - | 8.10E-15   | 4.57E-13   | -35.69597879 |
| chr5 | 142882374 | 142882374 | + | 0.00018951 | 0.0021886  | -27.81818182 |
| chr5 | 142910010 | 142910010 | - | 0          | 0          | -27.34723003 |
| chr5 | 142910023 | 142910023 | - | 0          | 0          | -25.00649456 |
| chr5 | 142938304 | 142938304 | + | 8.08E-10   | 2.69E-08   | -27.13974479 |
| chr5 | 142938329 | 142938329 | + | 4.24E-11   | 1.65E-09   | -29.71296668 |
| chr5 | 142938466 | 142938466 | - | 1.70E-14   | 9.30E-13   | -27.29696349 |
| chr5 | 142949797 | 142949797 | + | 0          | 0          | -31.20860281 |
| chr5 | 142949798 | 142949798 | - | 0          | 0          | -27.01010438 |
| chr5 | 142949833 | 142949833 | + | 0          | 0          | -25.76176298 |
| chr5 | 142949875 | 142949875 | - | 0          | 0          | -28.9055794  |
| chr5 | 142963620 | 142963620 | + | 0          | 0          | -26.08989669 |
| chr5 | 143253009 | 143253009 | + | 1.08E-09   | 3.54E-08   | -27.52616468 |
| chr5 | 143253033 | 143253033 | + | 9.39E-13   | 4.34E-11   | -35.70647931 |
| chr5 | 143357719 | 143357719 | + | 0.00115194 | 0.00990943 | 35.8560794   |

|      |           |           |   |            |            |              |
|------|-----------|-----------|---|------------|------------|--------------|
| chr5 | 143472145 | 143472145 | + | 0          | 0          | -37.95358425 |
| chr5 | 143625993 | 143625993 | + | 0          | 0          | -27.30201027 |
| chr5 | 143625996 | 143625996 | + | 0          | 0          | -25.2620104  |
| chr5 | 143965653 | 143965653 | + | 0          | 0          | -25.27916953 |
| chr5 | 143965702 | 143965702 | - | 0          | 0          | -25.33101717 |
| chr5 | 143981164 | 143981164 | - | 0          | 0          | -28.55750855 |
| chr5 | 144098829 | 144098829 | + | 0          | 0          | -32.68788344 |
| chr5 | 144098830 | 144098830 | - | 0          | 0          | -25.27544351 |
| chr5 | 144250054 | 144250054 | - | 4.96E-12   | 2.13E-10   | -51.26019274 |
| chr5 | 144258237 | 144258237 | - | 0          | 0          | -28.00357262 |
| chr5 | 144270205 | 144270205 | + | 4.88E-08   | 1.26E-06   | -37.16626214 |
| chr5 | 144548349 | 144548349 | - | 2.52E-05   | 0.00037748 | -25.42154567 |
| chr5 | 144548353 | 144548353 | - | 2.45E-05   | 0.00036833 | -25.59440559 |
| chr5 | 144548592 | 144548592 | - | 0.00042169 | 0.00431097 | -25.42056075 |
| chr5 | 145686658 | 145686658 | - | 7.34E-09   | 2.15E-07   | 48.48484848  |
| chr5 | 146897353 | 146897353 | - | 5.31E-06   | 9.38E-05   | -27.96531254 |
| chr5 | 146897370 | 146897370 | + | 0          | 0          | -29.07769665 |
| chr5 | 147045712 | 147045712 | - | 2.91E-05   | 0.00042834 | -41.33333333 |
| chr5 | 147198340 | 147198340 | + | 0.00017392 | 0.00203318 | -32.11051776 |
| chr5 | 147313213 | 147313213 | + | 0          | 0          | -25.38504307 |
| chr5 | 147316012 | 147316012 | + | 5.98E-11   | 2.28E-09   | -28.01686331 |
| chr5 | 147436999 | 147436999 | + | 0.00046642 | 0.00469315 | -26.03686636 |
| chr5 | 147559776 | 147559776 | + | 0          | 0          | -30.96088357 |
| chr5 | 147559777 | 147559777 | - | 0          | 0          | -28.66577877 |
| chr5 | 147559801 | 147559801 | - | 0          | 0          | -32.5623862  |
| chr5 | 147559818 | 147559818 | + | 0          | 0          | -28.88058203 |
| chr5 | 147559819 | 147559819 | - | 0          | 0          | -33.91463134 |
| chr5 | 147559838 | 147559838 | + | 0          | 0          | -29.88738299 |
| chr5 | 147559840 | 147559840 | + | 0          | 0          | -28.97669706 |
| chr5 | 147590423 | 147590423 | - | 1.01E-05   | 0.00016733 | -40.82278481 |
| chr5 | 147614970 | 147614970 | - | 0          | 0          | -25.30002886 |
| chr5 | 147742932 | 147742932 | - | 0.00057407 | 0.00558467 | -25.80946451 |
| chr5 | 147775199 | 147775199 | + | 9.11E-07   | 1.89E-05   | -65.2173913  |
| chr5 | 147826085 | 147826085 | + | 7.88E-15   | 4.45E-13   | -28.69569628 |
| chr5 | 147826103 | 147826103 | + | 5.28E-14   | 2.77E-12   | -29.93421053 |
| chr5 | 147835851 | 147835851 | + | 0          | 0          | -25.18883415 |
| chr5 | 147884093 | 147884093 | + | 1.04E-06   | 2.12E-05   | -26.95087719 |
| chr5 | 147893956 | 147893956 | + | 9.96E-06   | 0.00016487 | -35.71428571 |
| chr5 | 147964601 | 147964601 | - | 0.00013658 | 0.00165072 | 27.14063311  |
| chr5 | 148077569 | 148077569 | - | 1.66E-05   | 0.00026036 | -31.86864015 |
| chr5 | 148342322 | 148342322 | + | 1.22E-15   | 7.41E-14   | -25.71381133 |

|      |           |           |   |            |            |              |
|------|-----------|-----------|---|------------|------------|--------------|
| chr5 | 148645310 | 148645310 | - | 0.00095721 | 0.0085188  | 47.72727273  |
| chr5 | 148740432 | 148740432 | - | 0          | 0          | -25.91171052 |
| chr5 | 148809180 | 148809180 | - | 6.46E-11   | 2.46E-09   | -33.40495631 |
| chr5 | 148809226 | 148809226 | + | 0          | 0          | -26.81414354 |
| chr5 | 148809227 | 148809227 | - | 3.31E-14   | 1.76E-12   | -40.0532978  |
| chr5 | 148885991 | 148885991 | + | 0          | 0          | -35.26255457 |
| chr5 | 148886001 | 148886001 | + | 0          | 0          | -30.32397408 |
| chr5 | 148886033 | 148886033 | + | 0          | 0          | -33.73578037 |
| chr5 | 148886148 | 148886148 | - | 7.62E-12   | 3.21E-10   | -33.66576472 |
| chr5 | 148886184 | 148886184 | - | 1.10E-12   | 5.04E-11   | -33.32817936 |
| chr5 | 148935597 | 148935597 | - | 3.63E-05   | 0.00052054 | -30.1726122  |
| chr5 | 148978359 | 148978359 | + | 0          | 0          | -33.06788932 |
| chr5 | 148978428 | 148978428 | - | 0          | 0          | -32.38202449 |
| chr5 | 148978454 | 148978454 | - | 0          | 0          | -32.19724275 |
| chr5 | 148984885 | 148984885 | - | 0          | 0          | -31.71020156 |
| chr5 | 149031809 | 149031809 | - | 4.65E-11   | 1.80E-09   | -25.0163827  |
| chr5 | 149079444 | 149079444 | + | 0          | 0          | -30.43215838 |
| chr5 | 149079464 | 149079464 | - | 0          | 0          | -28.62123022 |
| chr5 | 149096616 | 149096616 | - | 3.24E-08   | 8.61E-07   | -33.21085359 |
| chr5 | 149324950 | 149324950 | - | 2.29E-09   | 7.19E-08   | -25.4676259  |
| chr5 | 149353564 | 149353564 | + | 0          | 0          | -25.01512097 |
| chr5 | 149353565 | 149353565 | - | 0          | 0          | -29.67709306 |
| chr5 | 149374958 | 149374958 | - | 0          | 0          | -25.17935898 |
| chr5 | 149411783 | 149411783 | + | 4.03E-06   | 7.31E-05   | -25.65357659 |
| chr5 | 149458690 | 149458690 | + | 0          | 0          | -36.90436914 |
| chr5 | 149458805 | 149458805 | - | 0          | 0          | -37.96181997 |
| chr5 | 150260125 | 150260125 | + | 0          | 0          | -25.76318019 |
| chr5 | 150260146 | 150260146 | + | 0          | 0          | -25.73521716 |
| chr5 | 150260152 | 150260152 | + | 0          | 0          | -27.0666422  |
| chr5 | 150260170 | 150260170 | - | 0          | 0          | -29.74008136 |
| chr5 | 150261816 | 150261816 | - | 6.71E-07   | 1.43E-05   | -25.40359151 |
| chr5 | 150261843 | 150261843 | - | 0          | 0          | -34.72222222 |
| chr6 | 3341248   | 3341248   | - | 0          | 0          | -28.88111331 |
| chr6 | 3734267   | 3734267   | - | 1.86E-05   | 0.00028842 | -29.62962963 |
| chr6 | 4504510   | 4504510   | - | 3.19E-09   | 9.83E-08   | -25.23079448 |
| chr6 | 4811651   | 4811651   | - | 8.66E-10   | 2.88E-08   | -38.57471264 |
| chr6 | 4811664   | 4811664   | - | 1.05E-05   | 0.00017314 | -28.31515152 |
| chr6 | 4811677   | 4811677   | - | 2.10E-11   | 8.44E-10   | -35.85858586 |
| chr6 | 4811701   | 4811701   | - | 3.89E-07   | 8.63E-06   | -33.18903319 |
| chr6 | 5172505   | 5172505   | + | 0          | 0          | -30.60703615 |
| chr6 | 5172506   | 5172506   | - | 0          | 0          | -29.98732065 |

|      |          |          |   |            |            |              |
|------|----------|----------|---|------------|------------|--------------|
| chr6 | 5380231  | 5380231  | - | 0          | 0          | -35.53691275 |
| chr6 | 5380235  | 5380235  | - | 0          | 0          | -40.13422819 |
| chr6 | 5380240  | 5380240  | - | 3.00E-15   | 1.76E-13   | -33.40451495 |
| chr6 | 5380247  | 5380247  | - | 1.50E-11   | 6.13E-10   | -29.16342715 |
| chr6 | 5380249  | 5380249  | - | 4.10E-12   | 1.78E-10   | -28.77104377 |
| chr6 | 5380261  | 5380261  | - | 0          | 0          | -40.13727883 |
| chr6 | 6006424  | 6006424  | - | 1.37E-05   | 0.00021858 | -40.48780488 |
| chr6 | 8642504  | 8642504  | - | 0.00050151 | 0.00498735 | 33.33333333  |
| chr6 | 12118476 | 12118476 | - | 1.37E-05   | 0.00021979 | -34.10174881 |
| chr6 | 13475047 | 13475047 | + | 5.93E-06   | 0.00010358 | -33.8646573  |
| chr6 | 15790182 | 15790182 | - | 0          | 0          | -30.50716302 |
| chr6 | 16796865 | 16796865 | + | 0.00020996 | 0.00238835 | -29.18660287 |
| chr6 | 17515819 | 17515819 | + | 1.55E-15   | 9.35E-14   | -26.87631027 |
| chr6 | 18003554 | 18003554 | - | 3.64E-09   | 1.11E-07   | 61.9047619   |
| chr6 | 18515219 | 18515219 | - | 0          | 0          | -38.17204301 |
| chr6 | 20537010 | 20537010 | + | 0.00042185 | 0.0043123  | -26.92307692 |
| chr6 | 21185362 | 21185362 | - | 2.06E-05   | 0.00031521 | -34.54317897 |
| chr6 | 21987173 | 21987173 | - | 1.11E-16   | 7.26E-15   | -26.32355654 |
| chr6 | 28132490 | 28132490 | - | 6.49E-11   | 2.47E-09   | -25.54234082 |
| chr6 | 28421061 | 28421061 | - | 2.62E-06   | 4.95E-05   | -25.90962441 |
| chr6 | 28831642 | 28831642 | - | 0          | 0          | -33.39071415 |
| chr6 | 29005520 | 29005520 | + | 1.03E-13   | 5.22E-12   | -26.82213664 |
| chr6 | 29065608 | 29065608 | - | 3.10E-08   | 8.28E-07   | -30.12820513 |
| chr6 | 29178289 | 29178289 | + | 0          | 0          | -26.0920799  |
| chr6 | 29397120 | 29397120 | - | 1.18E-07   | 2.86E-06   | -27.19140477 |
| chr6 | 29397256 | 29397256 | + | 3.30E-12   | 1.44E-10   | -30.59785222 |
| chr6 | 29397282 | 29397282 | + | 3.77E-08   | 9.93E-07   | -25.21978022 |
| chr6 | 29397283 | 29397283 | - | 5.24E-14   | 2.74E-12   | -38.28838547 |
| chr6 | 29397284 | 29397284 | + | 3.54E-10   | 1.23E-08   | -28.964579   |
| chr6 | 29397285 | 29397285 | - | 4.22E-09   | 1.28E-07   | -29.43845463 |
| chr6 | 29397387 | 29397387 | + | 3.56E-09   | 1.09E-07   | -34.21052632 |
| chr6 | 29397410 | 29397410 | + | 1.03E-14   | 5.76E-13   | -46.52777778 |
| chr6 | 29397470 | 29397470 | - | 0          | 0          | -30.20914547 |
| chr6 | 29649502 | 29649502 | - | 0.00045821 | 0.00462259 | -39.28571429 |
| chr6 | 30162384 | 30162384 | + | 0          | 0          | -35.8920798  |
| chr6 | 30162388 | 30162388 | + | 0          | 0          | -32.86644495 |
| chr6 | 30162489 | 30162489 | - | 0          | 0          | -27.82591544 |
| chr6 | 30206121 | 30206121 | - | 0          | 0          | -28.91220858 |
| chr6 | 30227525 | 30227525 | + | 0          | 0          | -30.00230261 |
| chr6 | 30551987 | 30551987 | + | 0          | 0          | -28.3887468  |
| chr6 | 30552044 | 30552044 | - | 0          | 0          | -29.88904169 |



|      |          |          |   |            |            |              |
|------|----------|----------|---|------------|------------|--------------|
| chr6 | 30552123 | 30552123 | + | 0.00020797 | 0.00236928 | -42.34449761 |
| chr6 | 30653217 | 30653217 | + | 0          | 0          | -30.04599779 |
| chr6 | 30658701 | 30658701 | + | 0          | 0          | -31.55157575 |
| chr6 | 30682706 | 30682706 | - | 0          | 0          | -26.95160561 |
| chr6 | 30732878 | 30732878 | - | 0          | 0          | -26.37045196 |
| chr6 | 31100284 | 31100284 | + | 0          | 0          | -44.96444159 |
| chr6 | 31100363 | 31100363 | - | 0          | 0          | -30.59848456 |
| chr6 | 31565521 | 31565521 | - | 5.12E-08   | 1.32E-06   | -34.1656988  |
| chr6 | 31565524 | 31565524 | - | 9.81E-07   | 2.02E-05   | -29.34027778 |
| chr6 | 31565526 | 31565526 | - | 1.25E-06   | 2.53E-05   | -27.71043771 |
| chr6 | 31624379 | 31624379 | - | 2.32E-08   | 6.30E-07   | -35.91803279 |
| chr6 | 31637170 | 31637170 | - | 0          | 0          | -29.58993971 |
| chr6 | 31917937 | 31917937 | + | 6.30E-09   | 1.86E-07   | 32.66005197  |
| chr6 | 32493569 | 32493569 | - | 0          | 0          | -25.05984648 |
| chr6 | 33019166 | 33019166 | - | 0.00052677 | 0.00519667 | -25.30864198 |
| chr6 | 34102474 | 34102474 | + | 6.72E-14   | 3.48E-12   | -27.15919085 |
| chr6 | 34229549 | 34229549 | + | 0          | 0          | -28.28861378 |
| chr6 | 34354127 | 34354127 | - | 0          | 0          | -25.30405071 |
| chr6 | 34691633 | 34691633 | - | 5.62E-07   | 1.21E-05   | -25.13174284 |
| chr6 | 34988483 | 34988483 | - | 0          | 0          | -29.52659926 |
| chr6 | 35248468 | 35248468 | + | 5.31E-07   | 1.15E-05   | -31.42857143 |
| chr6 | 37359368 | 37359368 | - | 0.00022677 | 0.00255048 | -31.42857143 |
| chr6 | 37359376 | 37359376 | - | 0.00048086 | 0.00481493 | -28.57142857 |
| chr6 | 37359381 | 37359381 | - | 9.17E-06   | 0.00015318 | -42.85714286 |
| chr6 | 37375575 | 37375575 | + | 0          | 0          | -25.108519   |
| chr6 | 37415741 | 37415741 | + | 7.41E-05   | 0.00097239 | -36.84210526 |
| chr6 | 37415953 | 37415953 | - | 4.05E-06   | 7.34E-05   | -33.33333333 |
| chr6 | 37428533 | 37428533 | + | 0          | 0          | -29.37656167 |
| chr6 | 39005491 | 39005491 | + | 0          | 0          | -45.74325782 |
| chr6 | 39005523 | 39005523 | - | 0          | 0          | -26.57386219 |
| chr6 | 39256437 | 39256437 | - | 0          | 0          | -38.48882706 |
| chr6 | 39256454 | 39256454 | - | 1.49E-14   | 8.19E-13   | -30.64954052 |
| chr6 | 39256482 | 39256482 | - | 0          | 0          | -45.1974001  |
| chr6 | 39256697 | 39256697 | - | 9.65E-10   | 3.19E-08   | -34.64288791 |
| chr6 | 39446098 | 39446098 | + | 6.51E-08   | 1.65E-06   | -30.55936857 |
| chr6 | 42262011 | 42262011 | + | 2.69E-10   | 9.51E-09   | -26.15046619 |
| chr6 | 42262012 | 42262012 | - | 5.80E-14   | 3.02E-12   | -30.46744234 |
| chr6 | 42323421 | 42323421 | + | 1.59E-08   | 4.44E-07   | -34.2997543  |
| chr6 | 43298425 | 43298425 | - | 7.46E-05   | 0.00097805 | -27.02040816 |
| chr6 | 47583605 | 47583605 | - | 7.61E-09   | 2.22E-07   | -25.59110542 |
| chr6 | 48396216 | 48396216 | - | 0.00010191 | 0.00128205 | -25.68771794 |

|      |          |          |   |            |            |              |
|------|----------|----------|---|------------|------------|--------------|
| chr6 | 48529287 | 48529287 | + | 3.94E-13   | 1.89E-11   | -28.28538759 |
| chr6 | 48572756 | 48572756 | - | 1.16E-10   | 4.27E-09   | -31.52799581 |
| chr6 | 48742566 | 48742566 | + | 0          | 0          | -33.2137845  |
| chr6 | 48742629 | 48742629 | - | 0          | 0          | -38.20122475 |
| chr6 | 48742674 | 48742674 | + | 3.83E-09   | 1.17E-07   | -33.38663256 |
| chr6 | 48742675 | 48742675 | - | 0          | 0          | -36.74810626 |
| chr6 | 48742704 | 48742704 | - | 2.34E-07   | 5.42E-06   | -27.15834301 |
| chr6 | 49270130 | 49270130 | + | 0.0008821  | 0.00796743 | -25.46296296 |
| chr6 | 49395486 | 49395486 | + | 0.00068786 | 0.00648834 | -29.16666667 |
| chr6 | 49779699 | 49779699 | + | 1.75E-13   | 8.70E-12   | -28.03921569 |
| chr6 | 49808304 | 49808304 | + | 7.77E-16   | 4.79E-14   | -30.44821526 |
| chr6 | 49808309 | 49808309 | + | 0          | 0          | -29.34035062 |
| chr6 | 50312617 | 50312617 | - | 1.42E-06   | 2.83E-05   | -30.68162502 |
| chr6 | 50809015 | 50809015 | + | 1.82E-12   | 8.18E-11   | -27.01525054 |
| chr6 | 50878080 | 50878080 | - | 0          | 0          | -30.18645677 |
| chr6 | 51613244 | 51613244 | - | 4.88E-15   | 2.82E-13   | -44.44262563 |
| chr6 | 51613282 | 51613282 | - | 7.63E-07   | 1.61E-05   | -28.26666667 |
| chr6 | 51613291 | 51613291 | - | 3.22E-11   | 1.27E-09   | -39.55436242 |
| chr6 | 51856612 | 51856612 | + | 0          | 0          | -51.67636486 |
| chr6 | 51856648 | 51856648 | - | 2.34E-07   | 5.41E-06   | -36.14661654 |
| chr6 | 52115896 | 52115896 | + | 1.14E-05   | 0.00018538 | -28.66734659 |
| chr6 | 52161262 | 52161262 | - | 0          | 0          | -33.25774754 |
| chr6 | 52161281 | 52161281 | - | 0          | 0          | -30.20993495 |
| chr6 | 52163860 | 52163860 | - | 0          | 0          | -26.69560359 |
| chr6 | 52164236 | 52164236 | + | 0          | 0          | -29.73561037 |
| chr6 | 52164237 | 52164237 | - | 0          | 0          | -25.65797206 |
| chr6 | 52165690 | 52165690 | + | 0          | 0          | -40.25488904 |
| chr6 | 52165721 | 52165721 | - | 1.91E-12   | 8.56E-11   | -26.45931936 |
| chr6 | 52175475 | 52175475 | - | 3.33E-16   | 2.11E-14   | -28.07772185 |
| chr6 | 52175513 | 52175513 | - | 0          | 0          | -35.23571726 |
| chr6 | 52175526 | 52175526 | + | 0          | 0          | -37.5473497  |
| chr6 | 52175549 | 52175549 | + | 0          | 0          | -37.03026482 |
| chr6 | 52175603 | 52175603 | - | 0          | 0          | -31.36500664 |
| chr6 | 52175615 | 52175615 | + | 0          | 0          | -31.03418923 |
| chr6 | 52175616 | 52175616 | - | 0          | 0          | -25.99148542 |
| chr6 | 52175627 | 52175627 | + | 0          | 0          | -26.30510863 |
| chr6 | 52175646 | 52175646 | + | 0          | 0          | -34.64375329 |
| chr6 | 52175647 | 52175647 | - | 0          | 0          | -31.54358552 |
| chr6 | 52175650 | 52175650 | + | 0          | 0          | -31.6824309  |
| chr6 | 52175651 | 52175651 | - | 0          | 0          | -33.24978389 |
| chr6 | 52175653 | 52175653 | + | 0          | 0          | -25.30962479 |

|      |          |          |   |          |            |              |
|------|----------|----------|---|----------|------------|--------------|
| chr6 | 52175656 | 52175656 | - | 0        | 0          | -31.38482593 |
| chr6 | 52175661 | 52175661 | + | 0        | 0          | -27.53349283 |
| chr6 | 52175662 | 52175662 | - | 0        | 0          | -31.93948869 |
| chr6 | 52175675 | 52175675 | - | 0        | 0          | -32.26042334 |
| chr6 | 52175739 | 52175739 | + | 1.61E-07 | 3.82E-06   | -25.69875776 |
| chr6 | 52175843 | 52175843 | + | 0        | 0          | -35.39360308 |
| chr6 | 52175941 | 52175941 | + | 0        | 0          | -29.1259847  |
| chr6 | 52175948 | 52175948 | + | 0        | 0          | -27.4296648  |
| chr6 | 52175995 | 52175995 | - | 0        | 0          | -31.25185625 |
| chr6 | 52175998 | 52175998 | - | 0        | 0          | -25.45190683 |
| chr6 | 52176009 | 52176009 | - | 0        | 0          | -28.75733138 |
| chr6 | 52176022 | 52176022 | - | 0        | 0          | -27.14996249 |
| chr6 | 52176034 | 52176034 | + | 3.33E-16 | 2.11E-14   | -31.60932881 |
| chr6 | 52176035 | 52176035 | - | 0        | 0          | -31.82306641 |
| chr6 | 52176039 | 52176039 | + | 4.98E-13 | 2.37E-11   | -28.57769012 |
| chr6 | 52176040 | 52176040 | - | 1.19E-07 | 2.88E-06   | -29.56302906 |
| chr6 | 52176043 | 52176043 | + | 2.22E-16 | 1.43E-14   | -33.7462091  |
| chr6 | 52176061 | 52176061 | + | 6.66E-16 | 4.13E-14   | -33.88119757 |
| chr6 | 52176062 | 52176062 | - | 6.21E-07 | 1.33E-05   | -26.60472973 |
| chr6 | 52176073 | 52176073 | + | 4.90E-12 | 2.11E-10   | -27.76539187 |
| chr6 | 52176074 | 52176074 | - | 5.81E-10 | 1.97E-08   | -32.92885203 |
| chr6 | 52177033 | 52177033 | + | 0        | 0          | -45.11475463 |
| chr6 | 52177165 | 52177165 | - | 0        | 0          | -50.44223226 |
| chr6 | 52177168 | 52177168 | - | 2.22E-16 | 1.43E-14   | -34.87689306 |
| chr6 | 52177190 | 52177190 | - | 0        | 0          | -44.77732794 |
| chr6 | 52177491 | 52177491 | - | 4.66E-05 | 0.00064886 | -38.27838828 |
| chr6 | 52177508 | 52177508 | + | 0        | 0          | -46.78306595 |
| chr6 | 52177509 | 52177509 | - | 1.37E-09 | 4.45E-08   | -47.25274725 |
| chr6 | 52177513 | 52177513 | + | 0        | 0          | -37.19286093 |
| chr6 | 52177531 | 52177531 | + | 0        | 0          | -41.07471053 |
| chr6 | 52177533 | 52177533 | + | 0        | 0          | -36.96048861 |
| chr6 | 52177549 | 52177549 | + | 0        | 0          | -42.60542209 |
| chr6 | 52177550 | 52177550 | - | 0        | 0          | -45.18453184 |
| chr6 | 52177560 | 52177560 | - | 0        | 0          | -39.91149261 |
| chr6 | 52177599 | 52177599 | - | 0        | 0          | -34.71479501 |
| chr6 | 52190635 | 52190635 | - | 0        | 0          | -27.51115215 |
| chr6 | 52191071 | 52191071 | - | 0        | 0          | -33.58164642 |
| chr6 | 52191075 | 52191075 | - | 1.11E-16 | 7.26E-15   | -28.57431982 |
| chr6 | 52191078 | 52191078 | - | 0        | 0          | -39.74158161 |
| chr6 | 52203847 | 52203847 | + | 0        | 0          | -38.8754331  |
| chr6 | 52203853 | 52203853 | + | 0        | 0          | -52.36759611 |

|      |          |          |   |   |   |              |
|------|----------|----------|---|---|---|--------------|
| chr6 | 52203858 | 52203858 | + | 0 | 0 | -47.79065472 |
| chr6 | 52203867 | 52203867 | + | 0 | 0 | -52.17014372 |
| chr6 | 52203871 | 52203871 | + | 0 | 0 | -51.34309574 |
| chr6 | 52203879 | 52203879 | + | 0 | 0 | -52.47777197 |
| chr6 | 52203894 | 52203894 | + | 0 | 0 | -49.34756421 |
| chr6 | 52203910 | 52203910 | - | 0 | 0 | -53.94183278 |
| chr6 | 52203914 | 52203914 | - | 0 | 0 | -54.04609084 |
| chr6 | 52203917 | 52203917 | - | 0 | 0 | -44.01740987 |
| chr6 | 52203954 | 52203954 | + | 0 | 0 | -48.98927464 |
| chr6 | 52203955 | 52203955 | - | 0 | 0 | -52.09097688 |
| chr6 | 52203957 | 52203957 | + | 0 | 0 | -46.34460515 |
| chr6 | 52203964 | 52203964 | + | 0 | 0 | -44.56793207 |
| chr6 | 52203969 | 52203969 | + | 0 | 0 | -46.90722399 |
| chr6 | 52203972 | 52203972 | + | 0 | 0 | -33.95711418 |
| chr6 | 52203999 | 52203999 | + | 0 | 0 | -45.37596447 |
| chr6 | 52204002 | 52204002 | + | 0 | 0 | -31.15648224 |
| chr6 | 52204020 | 52204020 | + | 0 | 0 | -45.19840671 |
| chr6 | 52204024 | 52204024 | + | 0 | 0 | -50.1610129  |
| chr6 | 52204036 | 52204036 | + | 0 | 0 | -39.53236398 |
| chr6 | 52204037 | 52204037 | - | 0 | 0 | -43.69004632 |
| chr6 | 52204051 | 52204051 | + | 0 | 0 | -46.35967504 |
| chr6 | 52204052 | 52204052 | - | 0 | 0 | -45.47480268 |
| chr6 | 52204056 | 52204056 | + | 0 | 0 | -46.71156546 |
| chr6 | 52204057 | 52204057 | - | 0 | 0 | -48.42632091 |
| chr6 | 52204060 | 52204060 | + | 0 | 0 | -47.76883335 |
| chr6 | 52204061 | 52204061 | - | 0 | 0 | -49.02573684 |
| chr6 | 52204066 | 52204066 | + | 0 | 0 | -48.93543956 |
| chr6 | 52204067 | 52204067 | - | 0 | 0 | -49.9802995  |
| chr6 | 52204073 | 52204073 | - | 0 | 0 | -48.45309633 |
| chr6 | 52204079 | 52204079 | - | 0 | 0 | -49.18350467 |
| chr6 | 52204085 | 52204085 | - | 0 | 0 | -50.06037415 |
| chr6 | 52204107 | 52204107 | + | 0 | 0 | -27.77083485 |
| chr6 | 52204108 | 52204108 | - | 0 | 0 | -43.08762878 |
| chr6 | 52204111 | 52204111 | + | 0 | 0 | -27.83404175 |
| chr6 | 52204112 | 52204112 | - | 0 | 0 | -44.58076209 |
| chr6 | 52204115 | 52204115 | - | 0 | 0 | -40.8332648  |
| chr6 | 52204130 | 52204130 | - | 0 | 0 | -47.21005615 |
| chr6 | 52204132 | 52204132 | - | 0 | 0 | -33.61455749 |
| chr6 | 52204140 | 52204140 | - | 0 | 0 | -42.84339417 |
| chr6 | 52204144 | 52204144 | - | 0 | 0 | -49.09447532 |
| chr6 | 52204146 | 52204146 | - | 0 | 0 | -50.15173716 |

|      |          |          |   |   |   |              |
|------|----------|----------|---|---|---|--------------|
| chr6 | 52204150 | 52204150 | - | 0 | 0 | -46.90851494 |
| chr6 | 52204153 | 52204153 | - | 0 | 0 | -43.29289834 |
| chr6 | 52204167 | 52204167 | + | 0 | 0 | -41.4068745  |
| chr6 | 52204174 | 52204174 | + | 0 | 0 | -38.71793852 |
| chr6 | 52204175 | 52204175 | - | 0 | 0 | -40.60345296 |
| chr6 | 52204178 | 52204178 | + | 0 | 0 | -42.49192882 |
| chr6 | 52204179 | 52204179 | - | 0 | 0 | -43.44909485 |
| chr6 | 52204182 | 52204182 | + | 0 | 0 | -37.98786838 |
| chr6 | 52204183 | 52204183 | - | 0 | 0 | -42.28778639 |
| chr6 | 52204186 | 52204186 | - | 0 | 0 | -28.63701704 |
| chr6 | 52204209 | 52204209 | + | 0 | 0 | -43.27213575 |
| chr6 | 52204210 | 52204210 | - | 0 | 0 | -48.91480011 |
| chr6 | 52204215 | 52204215 | + | 0 | 0 | -41.64953653 |
| chr6 | 52204216 | 52204216 | - | 0 | 0 | -46.73167257 |
| chr6 | 52204224 | 52204224 | + | 0 | 0 | -51.21021805 |
| chr6 | 52204225 | 52204225 | - | 0 | 0 | -48.18960681 |
| chr6 | 52204237 | 52204237 | + | 0 | 0 | -49.24760698 |
| chr6 | 52204240 | 52204240 | + | 0 | 0 | -48.34815816 |
| chr6 | 52204257 | 52204257 | + | 0 | 0 | -55.22379377 |
| chr6 | 52204258 | 52204258 | - | 0 | 0 | -53.06898683 |
| chr6 | 52204263 | 52204263 | + | 0 | 0 | -55.78534275 |
| chr6 | 52204264 | 52204264 | - | 0 | 0 | -53.45023304 |
| chr6 | 52204301 | 52204301 | - | 0 | 0 | -50.50168474 |
| chr6 | 52204715 | 52204715 | + | 0 | 0 | -47.2562339  |
| chr6 | 52204721 | 52204721 | + | 0 | 0 | -45.17591554 |
| chr6 | 52204801 | 52204801 | - | 0 | 0 | -40.86498005 |
| chr6 | 52204811 | 52204811 | - | 0 | 0 | -43.69790351 |
| chr6 | 52204815 | 52204815 | - | 0 | 0 | -39.42964473 |
| chr6 | 52204819 | 52204819 | - | 0 | 0 | -30.97361196 |
| chr6 | 52204822 | 52204822 | + | 0 | 0 | -39.45823107 |
| chr6 | 52204823 | 52204823 | - | 0 | 0 | -33.06655586 |
| chr6 | 52204825 | 52204825 | + | 0 | 0 | -45.0826004  |
| chr6 | 52204842 | 52204842 | + | 0 | 0 | -34.78510499 |
| chr6 | 52204843 | 52204843 | - | 0 | 0 | -36.47129738 |
| chr6 | 52204889 | 52204889 | - | 0 | 0 | -25.31061599 |
| chr6 | 52204929 | 52204929 | + | 0 | 0 | -30.3953954  |
| chr6 | 52204930 | 52204930 | - | 0 | 0 | -34.42080957 |
| chr6 | 52204943 | 52204943 | - | 0 | 0 | -40.39037433 |
| chr6 | 52208239 | 52208239 | + | 0 | 0 | -37.4020781  |
| chr6 | 52208276 | 52208276 | + | 0 | 0 | -45.60710349 |
| chr6 | 52208282 | 52208282 | + | 0 | 0 | -52.19935051 |

|      |          |          |   |            |            |              |
|------|----------|----------|---|------------|------------|--------------|
| chr6 | 52208283 | 52208283 | - | 0          | 0          | -52.05730739 |
| chr6 | 52208304 | 52208304 | - | 0          | 0          | -45.62508668 |
| chr6 | 52208328 | 52208328 | - | 0          | 0          | -26.43734165 |
| chr6 | 52208363 | 52208363 | + | 0          | 0          | -38.62156327 |
| chr6 | 52208409 | 52208409 | - | 0          | 0          | -30.0757345  |
| chr6 | 52208420 | 52208420 | - | 0          | 0          | -25.35493526 |
| chr6 | 52208481 | 52208481 | + | 1.78E-08   | 4.92E-07   | -25.17872221 |
| chr6 | 52209634 | 52209634 | - | 0          | 0          | -34.93280275 |
| chr6 | 52323454 | 52323454 | - | 7.70E-06   | 0.00013087 | -27.19958918 |
| chr6 | 52323487 | 52323487 | + | 0          | 0          | -26.18958608 |
| chr6 | 52323488 | 52323488 | - | 1.17E-11   | 4.83E-10   | -25.39869156 |
| chr6 | 52323500 | 52323500 | + | 0          | 0          | -28.05955365 |
| chr6 | 52479518 | 52479518 | + | 0          | 0          | -29.40912852 |
| chr6 | 52479530 | 52479530 | + | 0          | 0          | -33.05093471 |
| chr6 | 52663330 | 52663330 | - | 0          | 0          | -25.01550875 |
| chr6 | 53394580 | 53394580 | + | 0          | 0          | -37.19585509 |
| chr6 | 54021713 | 54021713 | - | 1.53E-07   | 3.64E-06   | -43.30210773 |
| chr6 | 54038939 | 54038939 | + | 0          | 0          | -31.02193845 |
| chr6 | 54069708 | 54069708 | + | 0.00014957 | 0.00178563 | -29.04911181 |
| chr6 | 54074174 | 54074174 | - | 1.15E-06   | 2.33E-05   | -34.25324675 |
| chr6 | 54485208 | 54485208 | + | 0          | 0          | -32.99999308 |
| chr6 | 54485227 | 54485227 | + | 0          | 0          | -30.99812433 |
| chr6 | 54485228 | 54485228 | - | 0          | 0          | -38.43279599 |
| chr6 | 54485243 | 54485243 | - | 6.77E-14   | 3.51E-12   | -25.20703934 |
| chr6 | 54485923 | 54485923 | + | 0          | 0          | -31.3870912  |
| chr6 | 54719829 | 54719829 | + | 0.00016287 | 0.00192159 | -39.63963964 |
| chr6 | 54719832 | 54719832 | + | 0.00098636 | 0.00873044 | -33.73737374 |
| chr6 | 54943614 | 54943614 | + | 0          | 0          | -42.35230204 |
| chr6 | 54943624 | 54943624 | + | 0          | 0          | -45.72110205 |
| chr6 | 54943664 | 54943664 | + | 0          | 0          | -45.37595955 |
| chr6 | 54943689 | 54943689 | - | 0          | 0          | -40.7793368  |
| chr6 | 54943699 | 54943699 | - | 0          | 0          | -55.21494333 |
| chr6 | 54943719 | 54943719 | + | 0          | 0          | -58.78357518 |
| chr6 | 54943720 | 54943720 | - | 0          | 0          | -55.97150666 |
| chr6 | 54943756 | 54943756 | + | 5.95E-11   | 2.27E-09   | -42.31001814 |
| chr6 | 54943944 | 54943944 | - | 0          | 0          | -53.09375    |
| chr6 | 54943953 | 54943953 | - | 2.22E-16   | 1.43E-14   | -41.15994458 |
| chr6 | 54943957 | 54943957 | - | 0          | 0          | -39.28571429 |
| chr6 | 54943969 | 54943969 | - | 0          | 0          | -44.6722561  |
| chr6 | 54943980 | 54943980 | - | 5.22E-15   | 3.00E-13   | -34.10529566 |
| chr6 | 54943982 | 54943982 | + | 0          | 0          | -38.7889439  |

|      |          |          |   |            |            |              |
|------|----------|----------|---|------------|------------|--------------|
| chr6 | 54943983 | 54943983 | - | 0          | 0          | -51.60197044 |
| chr6 | 54943989 | 54943989 | + | 0          | 0          | -35.56031843 |
| chr6 | 54943991 | 54943991 | + | 0          | 0          | -44.89586403 |
| chr6 | 54943998 | 54943998 | + | 0          | 0          | -33.20599514 |
| chr6 | 54944021 | 54944021 | + | 0          | 0          | -29.06642751 |
| chr6 | 55275217 | 55275217 | + | 0          | 0          | -27.79682243 |
| chr6 | 55275271 | 55275271 | - | 0          | 0          | -28.47309136 |
| chr6 | 55275284 | 55275284 | - | 0          | 0          | -34.51133042 |
| chr6 | 55732849 | 55732849 | - | 5.55E-05   | 0.00075521 | -43.33333333 |
| chr6 | 58745639 | 58745639 | + | 4.46E-05   | 0.00062457 | 31.81818182  |
| chr6 | 58906778 | 58906778 | + | 0          | 0          | -30.37179487 |
| chr6 | 59004633 | 59004633 | + | 0.00100197 | 0.00884556 | 25.38593482  |
| chr6 | 64997026 | 64997026 | + | 2.56E-14   | 1.38E-12   | -27.58416071 |
| chr6 | 65671173 | 65671173 | + | 0          | 0          | -28.47590639 |
| chr6 | 66976064 | 66976064 | + | 0          | 0          | -28.61002954 |
| chr6 | 66976065 | 66976065 | - | 0          | 0          | -30.43075441 |
| chr6 | 67113800 | 67113800 | + | 0          | 0          | -28.7447226  |
| chr6 | 67113815 | 67113815 | + | 0          | 0          | -31.01833444 |
| chr6 | 67113816 | 67113816 | - | 0          | 0          | -30.54534314 |
| chr6 | 67113836 | 67113836 | - | 0          | 0          | -33.42757052 |
| chr6 | 67140529 | 67140529 | + | 6.04E-08   | 1.54E-06   | -26.09902509 |
| chr6 | 68641258 | 68641258 | - | 8.30E-05   | 0.0010725  | -30.12820513 |
| chr6 | 70912368 | 70912368 | + | 0.00029064 | 0.00315152 | -26.49122807 |
| chr6 | 70966014 | 70966014 | - | 1.98E-05   | 0.00030492 | -39.84126984 |
| chr6 | 70967415 | 70967415 | + | 0          | 0          | -28.67234011 |
| chr6 | 70992055 | 70992055 | - | 0.00030331 | 0.00326791 | -26.90552645 |
| chr6 | 71767899 | 71767899 | + | 3.05E-11   | 1.20E-09   | -35.55844156 |
| chr6 | 71980410 | 71980410 | + | 0          | 0          | -41.40687511 |
| chr6 | 71980424 | 71980424 | + | 0          | 0          | -35.09985115 |
| chr6 | 71980492 | 71980492 | - | 0          | 0          | -29.77807597 |
| chr6 | 71980533 | 71980533 | - | 0          | 0          | -28.70573106 |
| chr6 | 72092967 | 72092967 | - | 0          | 0          | -29.10994985 |
| chr6 | 72277142 | 72277142 | - | 0          | 0          | -29.65234894 |
| chr6 | 72340603 | 72340603 | + | 7.74E-10   | 2.59E-08   | -32.8031519  |
| chr6 | 72634367 | 72634367 | - | 1.11E-16   | 7.26E-15   | -27.23214286 |
| chr6 | 72634404 | 72634404 | - | 0          | 0          | -30.60873208 |
| chr6 | 72677432 | 72677432 | + | 1.30E-07   | 3.13E-06   | -27.59776536 |
| chr6 | 72677462 | 72677462 | + | 2.15E-14   | 1.17E-12   | -39.390681   |
| chr6 | 72677646 | 72677646 | - | 0          | 0          | -38.68654902 |
| chr6 | 72677666 | 72677666 | - | 0          | 0          | -53.05555556 |
| chr6 | 72737106 | 72737106 | + | 0          | 0          | -32.03289474 |

|      |          |          |   |            |            |              |
|------|----------|----------|---|------------|------------|--------------|
| chr6 | 72788210 | 72788210 | + | 6.82E-13   | 3.20E-11   | -33.05418719 |
| chr6 | 72788217 | 72788217 | + | 6.02E-10   | 2.04E-08   | -26.46812782 |
| chr6 | 72927239 | 72927239 | - | 1.34E-09   | 4.35E-08   | -37.55641522 |
| chr6 | 72989279 | 72989279 | - | 9.19E-14   | 4.70E-12   | -26.09736066 |
| chr6 | 72989311 | 72989311 | - | 1.50E-14   | 8.25E-13   | -25.9271358  |
| chr6 | 82091862 | 82091862 | - | 0          | 0          | -33.79888268 |
| chr6 | 82091891 | 82091891 | - | 1.11E-16   | 7.26E-15   | -27.56734007 |
| chr6 | 82092133 | 82092133 | + | 0          | 0          | -25.19155991 |
| chr6 | 82092154 | 82092154 | - | 0          | 0          | -30.1914265  |
| chr6 | 82092201 | 82092201 | - | 0          | 0          | -26.33333333 |
| chr6 | 82753198 | 82753198 | + | 0          | 0          | -30.73903189 |
| chr6 | 83028495 | 83028495 | - | 0          | 0          | -38.46647205 |
| chr6 | 83029944 | 83029944 | - | 2.40E-06   | 4.58E-05   | -25.97587719 |
| chr6 | 83061016 | 83061016 | - | 0          | 0          | -26.50034134 |
| chr6 | 83087668 | 83087668 | - | 0          | 0          | -29.82088345 |
| chr6 | 83135550 | 83135550 | + | 0          | 0          | -34.56666667 |
| chr6 | 83135560 | 83135560 | + | 0          | 0          | -34.28264962 |
| chr6 | 83161434 | 83161434 | + | 3.68E-12   | 1.60E-10   | -35.78567128 |
| chr6 | 83161570 | 83161570 | + | 0          | 0          | -33.04189636 |
| chr6 | 83161571 | 83161571 | - | 0          | 0          | -32.49343254 |
| chr6 | 83161727 | 83161727 | + | 0          | 0          | -31.581263   |
| chr6 | 83179861 | 83179861 | + | 0          | 0          | -28.47331898 |
| chr6 | 83288369 | 83288369 | + | 0          | 0          | -27.98718896 |
| chr6 | 83442236 | 83442236 | - | 9.66E-06   | 0.00016039 | -41.86698718 |
| chr6 | 83502145 | 83502145 | - | 0          | 0          | -29.49519231 |
| chr6 | 83599407 | 83599407 | - | 0          | 0          | -32.4915641  |
| chr6 | 84012317 | 84012317 | + | 0          | 0          | -26.03414376 |
| chr6 | 84106105 | 84106105 | - | 0.0001145  | 0.00141627 | -25.22222222 |
| chr6 | 84106127 | 84106127 | - | 0.00032212 | 0.00343842 | -25.72565543 |
| chr6 | 85424049 | 85424049 | + | 2.05E-07   | 4.80E-06   | -28.63477159 |
| chr6 | 85424093 | 85424093 | + | 1.51E-13   | 7.56E-12   | -38.01310537 |
| chr6 | 85424279 | 85424279 | - | 3.58E-13   | 1.73E-11   | -28.59774213 |
| chr6 | 86098605 | 86098605 | - | 2.19E-07   | 5.08E-06   | -49.46949602 |
| chr6 | 86234004 | 86234004 | + | 0          | 0          | -28.48861284 |
| chr6 | 86234019 | 86234019 | + | 0          | 0          | -28.09935575 |
| chr6 | 86628080 | 86628080 | + | 2.02E-13   | 1.00E-11   | -31.81294171 |
| chr6 | 86628278 | 86628278 | - | 4.74E-07   | 1.04E-05   | -25.59076262 |
| chr6 | 86628292 | 86628292 | + | 0          | 0          | -39.27641679 |
| chr6 | 86654631 | 86654631 | - | 0          | 0          | -26.51148336 |
| chr6 | 86654659 | 86654659 | - | 0          | 0          | -26.03645986 |
| chr6 | 86803808 | 86803808 | - | 5.10E-05   | 0.00070153 | -31.16818558 |



|      |          |          |   |           |            |              |
|------|----------|----------|---|-----------|------------|--------------|
| chr6 | 87535980 | 87535980 | + | 9.33E-07  | 1.93E-05   | -28.3446712  |
| chr6 | 87722448 | 87722448 | + | 0         | 0          | -26.36877536 |
| chr6 | 87876426 | 87876426 | - | 0         | 0          | -27.69800521 |
| chr6 | 87994330 | 87994330 | + | 0         | 0          | -45.4047777  |
| chr6 | 87994462 | 87994462 | - | 1.67E-05  | 0.00026137 | -29.29909042 |
| chr6 | 87994484 | 87994484 | - | 2.83E-06  | 5.31E-05   | -32.54716981 |
| chr6 | 87994488 | 87994488 | - | 2.41E-06  | 4.58E-05   | -31.52173913 |
| chr6 | 88056292 | 88056292 | - | 1.07E-12  | 4.90E-11   | -25.022987   |
| chr6 | 88106900 | 88106900 | - | 4.61E-05  | 0.00064276 | 38.63636364  |
| chr6 | 88116568 | 88116568 | + | 0.0002389 | 0.00266742 | 33.39534884  |
| chr6 | 88136105 | 88136105 | + | 2.80E-10  | 9.86E-09   | -28.57142857 |
| chr6 | 88136106 | 88136106 | - | 0         | 0          | -32.44901104 |
| chr6 | 88136143 | 88136143 | - | 0         | 0          | -26.74184298 |
| chr6 | 88140653 | 88140653 | + | 2.22E-16  | 1.43E-14   | -25.62870612 |
| chr6 | 88145940 | 88145940 | + | 1.11E-08  | 3.16E-07   | -25.36151279 |
| chr6 | 88147398 | 88147398 | + | 4.09E-14  | 2.16E-12   | -26.85344434 |
| chr6 | 88190034 | 88190034 | + | 5.11E-15  | 2.94E-13   | -35.96927934 |
| chr6 | 88190059 | 88190059 | + | 0         | 0          | -43.69435746 |
| chr6 | 88190163 | 88190163 | + | 0         | 0          | -31.54631083 |
| chr6 | 88190165 | 88190165 | + | 0         | 0          | -32.20247464 |
| chr6 | 88190187 | 88190187 | + | 0         | 0          | -27.34031666 |
| chr6 | 88190217 | 88190217 | - | 0         | 0          | -40.54855758 |
| chr6 | 88190672 | 88190672 | + | 0         | 0          | -43.77397795 |
| chr6 | 88190675 | 88190675 | + | 0         | 0          | -50.90035587 |
| chr6 | 88190684 | 88190684 | + | 0         | 0          | -33.70697111 |
| chr6 | 88190686 | 88190686 | + | 0         | 0          | -44.9657869  |
| chr6 | 88190708 | 88190708 | + | 0         | 0          | -43.7423646  |
| chr6 | 88190711 | 88190711 | + | 0         | 0          | -46.04851752 |
| chr6 | 88190713 | 88190713 | + | 5.55E-15  | 3.18E-13   | -32.90072315 |
| chr6 | 88190715 | 88190715 | + | 0         | 0          | -39.22552113 |
| chr6 | 88190869 | 88190869 | - | 0         | 0          | -42.40163815 |
| chr6 | 88190880 | 88190880 | - | 7.44E-15  | 4.21E-13   | -40.07381392 |
| chr6 | 88190886 | 88190886 | + | 0         | 0          | -42.59313296 |
| chr6 | 88190897 | 88190897 | + | 0         | 0          | -44.23273803 |
| chr6 | 88190898 | 88190898 | - | 0         | 0          | -42.81755618 |
| chr6 | 88190918 | 88190918 | + | 1.89E-15  | 1.13E-13   | -28.81458967 |
| chr6 | 88190919 | 88190919 | - | 6.55E-15  | 3.73E-13   | -29.45484811 |
| chr6 | 88190922 | 88190922 | - | 0         | 0          | -38.60635242 |
| chr6 | 88190959 | 88190959 | + | 0         | 0          | -30.95998909 |
| chr6 | 88190996 | 88190996 | + | 0         | 0          | -27.15744785 |
| chr6 | 88190997 | 88190997 | - | 0         | 0          | -27.86258065 |

|      |          |          |   |            |            |              |
|------|----------|----------|---|------------|------------|--------------|
| chr6 | 88191028 | 88191028 | + | 0          | 0          | -48.63924487 |
| chr6 | 88191029 | 88191029 | - | 0          | 0          | -35.51357725 |
| chr6 | 88191058 | 88191058 | - | 1.33E-07   | 3.20E-06   | -25.72278912 |
| chr6 | 88194840 | 88194840 | - | 7.26E-05   | 0.00095477 | -25.44642857 |
| chr6 | 88194862 | 88194862 | - | 0.00015882 | 0.00188052 | -25.85034014 |
| chr6 | 88200567 | 88200567 | + | 0.00033406 | 0.00354559 | -39.74358974 |
| chr6 | 88200644 | 88200644 | - | 0          | 0          | -27.36011898 |
| chr6 | 88202011 | 88202011 | + | 0          | 0          | -32.19711318 |
| chr6 | 88204480 | 88204480 | + | 0          | 0          | -28.24358281 |
| chr6 | 88204491 | 88204491 | + | 1.11E-16   | 7.26E-15   | -30.95493947 |
| chr6 | 88204494 | 88204494 | + | 1.11E-16   | 7.26E-15   | -28.84654147 |
| chr6 | 88204647 | 88204647 | - | 0          | 0          | -41.24040672 |
| chr6 | 88204654 | 88204654 | + | 0          | 0          | -38.75946486 |
| chr6 | 88204660 | 88204660 | + | 0          | 0          | -37.61284279 |
| chr6 | 88235777 | 88235777 | + | 0          | 0          | -25.15318842 |
| chr6 | 88235778 | 88235778 | - | 0          | 0          | -25.04587417 |
| chr6 | 88235852 | 88235852 | - | 0          | 0          | -26.93632502 |
| chr6 | 88235858 | 88235858 | + | 2.22E-16   | 1.43E-14   | -28.57004644 |
| chr6 | 88235868 | 88235868 | + | 0          | 0          | -29.94733265 |
| chr6 | 88235872 | 88235872 | + | 0          | 0          | -28.12953885 |
| chr6 | 88235873 | 88235873 | - | 0          | 0          | -25.66983533 |
| chr6 | 88235895 | 88235895 | - | 2.16E-14   | 1.17E-12   | -26.56485671 |
| chr6 | 88235924 | 88235924 | + | 0.00038737 | 0.00401547 | -35.16771488 |
| chr6 | 88235926 | 88235926 | + | 1.72E-06   | 3.37E-05   | -49.04904905 |
| chr6 | 88236174 | 88236174 | - | 1.98E-06   | 3.85E-05   | -34.13840571 |
| chr6 | 88236201 | 88236201 | + | 1.43E-13   | 7.18E-12   | -27.87545788 |
| chr6 | 88236202 | 88236202 | - | 0          | 0          | -39.33558559 |
| chr6 | 88236207 | 88236207 | + | 6.33E-15   | 3.61E-13   | -25.90616482 |
| chr6 | 88236208 | 88236208 | - | 0          | 0          | -34.84162896 |
| chr6 | 88236213 | 88236213 | - | 0          | 0          | -33.79475498 |
| chr6 | 88236214 | 88236214 | + | 0          | 0          | -31.26600861 |
| chr6 | 88236215 | 88236215 | - | 0          | 0          | -34.76867045 |
| chr6 | 88236220 | 88236220 | + | 1.99E-05   | 0.00030653 | -33.80713489 |
| chr6 | 88236221 | 88236221 | - | 0          | 0          | -34.71234648 |
| chr6 | 88236255 | 88236255 | + | 0          | 0          | -42.97248804 |
| chr6 | 88236262 | 88236262 | + | 0          | 0          | -32.43738176 |
| chr6 | 88236357 | 88236357 | - | 0          | 0          | -29.92602947 |
| chr6 | 88565364 | 88565364 | + | 0          | 0          | -30.18826513 |
| chr6 | 88934779 | 88934779 | - | 1.69E-08   | 4.70E-07   | -35.71235103 |
| chr6 | 89281916 | 89281916 | - | 0          | 0          | -32.23898378 |
| chr6 | 89288446 | 89288446 | + | 4.77E-15   | 2.75E-13   | -33.05322129 |

|      |          |          |   |            |            |              |
|------|----------|----------|---|------------|------------|--------------|
| chr6 | 89298894 | 89298894 | + | 0          | 0          | -28.92228398 |
| chr6 | 90548259 | 90548259 | + | 0          | 0          | -35.12406618 |
| chr6 | 90619440 | 90619440 | - | 9.46E-05   | 0.00120216 | -28.36438923 |
| chr6 | 90757773 | 90757773 | - | 0          | 0          | -32.21831184 |
| chr6 | 90757789 | 90757789 | - | 0          | 0          | -34.9461217  |
| chr6 | 91081016 | 91081016 | - | 1.56E-05   | 0.00024622 | -46.15384615 |
| chr6 | 91566561 | 91566561 | + | 0          | 0          | -26.18346469 |
| chr6 | 91566591 | 91566591 | + | 0          | 0          | -25.18575702 |
| chr6 | 91577086 | 91577086 | + | 2.33E-10   | 8.30E-09   | -29.70400119 |
| chr6 | 91577103 | 91577103 | + | 4.93E-12   | 2.12E-10   | -27.39205874 |
| chr6 | 91721489 | 91721489 | + | 0          | 0          | -33.67546059 |
| chr6 | 91721490 | 91721490 | - | 6.13E-05   | 0.00082465 | -30.35196687 |
| chr6 | 91721506 | 91721506 | + | 0          | 0          | -33.04698017 |
| chr6 | 91721507 | 91721507 | - | 0          | 0          | -38.78930131 |
| chr6 | 91721537 | 91721537 | - | 1.11E-16   | 7.26E-15   | -32.70327799 |
| chr6 | 91808570 | 91808570 | - | 0.00044965 | 0.00454995 | -31.30826101 |
| chr6 | 91960212 | 91960212 | + | 1.90E-13   | 9.41E-12   | -32.3125323  |
| chr6 | 91960234 | 91960234 | + | 0          | 0          | -46.83490163 |
| chr6 | 92532013 | 92532013 | + | 0.00089869 | 0.00809056 | 25.92592593  |
| chr6 | 92945006 | 92945006 | - | 4.22E-05   | 0.0005952  | -27.57831325 |
| chr6 | 93698940 | 93698940 | + | 1.65E-08   | 4.58E-07   | -26.53679654 |
| chr6 | 93727725 | 93727725 | + | 7.91E-09   | 2.30E-07   | -26.50160264 |
| chr6 | 94171293 | 94171293 | + | 4.80E-06   | 8.56E-05   | -25.69734151 |
| chr6 | 94183774 | 94183774 | - | 8.19E-05   | 0.00105999 | -31.21356651 |
| chr6 | 94281740 | 94281740 | + | 2.89E-05   | 0.00042535 | -27.19917623 |
| chr6 | 94640616 | 94640616 | - | 1.67E-06   | 3.29E-05   | -40.56338028 |
| chr6 | 94685073 | 94685073 | + | 2.87E-13   | 1.40E-11   | -34.19282511 |
| chr6 | 94729877 | 94729877 | + | 3.73E-07   | 8.30E-06   | -37.02811245 |
| chr6 | 96028525 | 96028525 | + | 1.37E-14   | 7.54E-13   | -26.15793017 |
| chr6 | 97110388 | 97110388 | + | 8.10E-10   | 2.70E-08   | -32.72664835 |
| chr6 | 97144622 | 97144622 | + | 1.70E-08   | 4.73E-07   | -25.55263158 |
| chr6 | 97144623 | 97144623 | - | 0          | 0          | -26.0276444  |
| chr6 | 97176088 | 97176088 | - | 0.00066966 | 0.00634629 | -25.26315789 |
| chr6 | 97221359 | 97221359 | + | 0          | 0          | -26.16472259 |
| chr6 | 97253215 | 97253215 | - | 0          | 0          | -25.3318981  |
| chr6 | 97368368 | 97368368 | + | 2.22E-16   | 1.43E-14   | -30.50574119 |
| chr6 | 97479584 | 97479584 | + | 1.32E-09   | 4.27E-08   | -25.59626685 |
| chr6 | 97488359 | 97488359 | - | 0          | 0          | -31.24242533 |
| chr6 | 97508757 | 97508757 | - | 4.52E-08   | 1.18E-06   | -26.01799775 |
| chr6 | 97518076 | 97518076 | - | 6.71E-14   | 3.47E-12   | -27.65323365 |
| chr6 | 97534342 | 97534342 | - | 1.57E-13   | 7.85E-12   | -35.82693947 |

|      |           |           |   |            |            |              |
|------|-----------|-----------|---|------------|------------|--------------|
| chr6 | 97534355  | 97534355  | - | 6.47E-08   | 1.64E-06   | -25.80360013 |
| chr6 | 97568571  | 97568571  | + | 0.00046828 | 0.00470851 | -25.73591253 |
| chr6 | 97568591  | 97568591  | + | 1.47E-05   | 0.00023357 | -35.95238095 |
| chr6 | 99030195  | 99030195  | + | 3.14E-12   | 1.38E-10   | -35.2213868  |
| chr6 | 99030243  | 99030243  | + | 1.23E-08   | 3.49E-07   | -27.36842105 |
| chr6 | 99030244  | 99030244  | - | 0          | 0          | -25.1863354  |
| chr6 | 99044039  | 99044039  | - | 0.00030365 | 0.00327107 | -27.82446312 |
| chr6 | 99204130  | 99204130  | - | 1.19E-10   | 4.38E-09   | -48.07260156 |
| chr6 | 99204137  | 99204137  | - | 6.24E-06   | 0.00010838 | -28.68791698 |
| chr6 | 99439974  | 99439974  | + | 0          | 0          | -31.50971599 |
| chr6 | 99440010  | 99440010  | + | 0          | 0          | -39.64646465 |
| chr6 | 99440011  | 99440011  | - | 0          | 0          | -31.41971543 |
| chr6 | 99440029  | 99440029  | + | 0          | 0          | -37.02352284 |
| chr6 | 99440083  | 99440083  | + | 0          | 0          | -34.17442193 |
| chr6 | 99440084  | 99440084  | - | 0          | 0          | -40.29355472 |
| chr6 | 99440090  | 99440090  | + | 0          | 0          | -35.94218082 |
| chr6 | 99440099  | 99440099  | + | 0          | 0          | -30.48769309 |
| chr6 | 99440230  | 99440230  | - | 0          | 0          | -35.07575426 |
| chr6 | 99819758  | 99819758  | - | 1.02E-10   | 3.81E-09   | -28.71952609 |
| chr6 | 100196120 | 100196120 | + | 0          | 0          | -41.57022208 |
| chr6 | 100196205 | 100196205 | - | 0          | 0          | -35.10150948 |
| chr6 | 100213016 | 100213016 | + | 6.66E-14   | 3.45E-12   | -25.56426645 |
| chr6 | 100213017 | 100213017 | - | 0          | 0          | -36.24033464 |
| chr6 | 100331594 | 100331594 | + | 0.00065836 | 0.00625764 | -30.55555556 |
| chr6 | 100432809 | 100432809 | - | 0.00026702 | 0.00293341 | -32.91925466 |
| chr6 | 100709697 | 100709697 | - | 2.09E-05   | 0.00031903 | -28.28580793 |
| chr6 | 101376610 | 101376610 | - | 0          | 0          | -39.29014407 |
| chr6 | 101454097 | 101454097 | + | 0          | 0          | -26.41941095 |
| chr6 | 108232107 | 108232107 | + | 1.88E-08   | 5.18E-07   | -26.82553842 |
| chr6 | 108238138 | 108238138 | + | 2.09E-05   | 0.00031968 | -28.20102798 |
| chr6 | 108392634 | 108392634 | - | 1.11E-16   | 7.26E-15   | -29.54790275 |
| chr6 | 108456817 | 108456817 | - | 0          | 0          | -44.41856561 |
| chr6 | 108456853 | 108456853 | - | 0          | 0          | -35.1009584  |
| chr6 | 108456869 | 108456869 | + | 0          | 0          | -32.40133182 |
| chr6 | 108456870 | 108456870 | - | 0          | 0          | -35.84978521 |
| chr6 | 108456897 | 108456897 | - | 0          | 0          | -28.3463408  |
| chr6 | 108759790 | 108759790 | - | 6.64E-05   | 0.0008843  | -33.40445709 |
| chr6 | 113000931 | 113000931 | + | 2.74E-07   | 6.26E-06   | -30.53817272 |
| chr6 | 113171737 | 113171737 | - | 6.61E-08   | 1.67E-06   | -28.9615784  |
| chr6 | 113409240 | 113409240 | - | 4.69E-06   | 8.38E-05   | -49.6624156  |
| chr6 | 113471020 | 113471020 | + | 3.77E-15   | 2.20E-13   | -26.98604294 |

|      |           |           |   |            |            |              |
|------|-----------|-----------|---|------------|------------|--------------|
| chr6 | 113501886 | 113501886 | - | 0          | 0          | -25.83209329 |
| chr6 | 113501913 | 113501913 | + | 0          | 0          | -25.36447841 |
| chr6 | 113690638 | 113690638 | + | 0          | 0          | -29.53775133 |
| chr6 | 113690787 | 113690787 | - | 0          | 0          | -43.72781665 |
| chr6 | 113690800 | 113690800 | + | 0          | 0          | -27.11279632 |
| chr6 | 113690801 | 113690801 | - | 0          | 0          | -32.6135935  |
| chr6 | 113690819 | 113690819 | + | 0          | 0          | -29.9106265  |
| chr6 | 114014714 | 114014714 | - | 0.00066385 | 0.00630022 | -43.12039312 |
| chr6 | 114411272 | 114411272 | - | 0          | 0          | -27.14705781 |
| chr6 | 114724354 | 114724354 | + | 5.36E-10   | 1.83E-08   | -25.42622951 |
| chr6 | 114724897 | 114724897 | + | 1.68E-06   | 3.31E-05   | -29.81855095 |
| chr6 | 114724912 | 114724912 | + | 2.34E-08   | 6.36E-07   | -29.48054437 |
| chr6 | 114724917 | 114724917 | + | 3.01E-10   | 1.06E-08   | -35.57595573 |
| chr6 | 114725470 | 114725470 | - | 0          | 0          | -40.31032669 |
| chr6 | 114738393 | 114738393 | + | 0          | 0          | -54.32436172 |
| chr6 | 114738398 | 114738398 | + | 0          | 0          | -63.79874214 |
| chr6 | 114738402 | 114738402 | + | 0          | 0          | -51.11779115 |
| chr6 | 114738405 | 114738405 | + | 0          | 0          | -65.20108664 |
| chr6 | 114738414 | 114738414 | + | 0          | 0          | -58.65197853 |
| chr6 | 114738427 | 114738427 | + | 0          | 0          | -62.70399971 |
| chr6 | 114738429 | 114738429 | + | 0          | 0          | -58.3958093  |
| chr6 | 114738433 | 114738433 | + | 0          | 0          | -67.96820487 |
| chr6 | 114738542 | 114738542 | - | 0          | 0          | -57.84854161 |
| chr6 | 114738544 | 114738544 | - | 0          | 0          | -56.50972502 |
| chr6 | 114738548 | 114738548 | - | 0          | 0          | -56.77361392 |
| chr6 | 114738552 | 114738552 | - | 0          | 0          | -62.74909732 |
| chr6 | 114738562 | 114738562 | - | 0          | 0          | -39.53880431 |
| chr6 | 114738586 | 114738586 | - | 0          | 0          | -56.1803989  |
| chr6 | 114738590 | 114738590 | + | 1.25E-06   | 2.53E-05   | -27.88571429 |
| chr6 | 114738591 | 114738591 | - | 0          | 0          | -45.73758467 |
| chr6 | 114738598 | 114738598 | + | 2.22E-16   | 1.43E-14   | -45.9492947  |
| chr6 | 114738601 | 114738601 | + | 7.20E-09   | 2.11E-07   | -33.14285714 |
| chr6 | 114738612 | 114738612 | + | 3.77E-15   | 2.20E-13   | -37.73496241 |
| chr6 | 114738620 | 114738620 | + | 1.74E-12   | 7.82E-11   | -33.95847573 |
| chr6 | 114817650 | 114817650 | + | 0          | 0          | -41.26134067 |
| chr6 | 114901781 | 114901781 | - | 0.00054089 | 0.00531346 | -28.57142857 |
| chr6 | 114901816 | 114901816 | - | 0.00011661 | 0.00143922 | -31.0986311  |
| chr6 | 115538878 | 115538878 | + | 1.35E-08   | 3.80E-07   | -26.83150183 |
| chr6 | 115619808 | 115619808 | + | 0          | 0          | -29.94636247 |
| chr6 | 115730444 | 115730444 | + | 0          | 0          | -34.12162162 |
| chr6 | 115730481 | 115730481 | + | 0          | 0          | -36.73578614 |

|      |           |           |   |            |            |              |
|------|-----------|-----------|---|------------|------------|--------------|
| chr6 | 115730482 | 115730482 | - | 0          | 0          | -37.51636126 |
| chr6 | 115730493 | 115730493 | - | 0          | 0          | -37.72178592 |
| chr6 | 115806037 | 115806037 | - | 0          | 0          | -25.0988628  |
| chr6 | 115898323 | 115898323 | + | 0          | 0          | -33.80211293 |
| chr6 | 115957409 | 115957409 | + | 0          | 0          | -25.22926856 |
| chr6 | 115991756 | 115991756 | + | 2.89E-15   | 1.70E-13   | -25.47082433 |
| chr6 | 115991956 | 115991956 | - | 1.78E-13   | 8.85E-12   | -25.80061417 |
| chr6 | 115993467 | 115993467 | - | 0          | 0          | -41.35698962 |
| chr6 | 115993500 | 115993500 | - | 0          | 0          | -32.79798964 |
| chr6 | 116003945 | 116003945 | - | 0          | 0          | -30.63740793 |
| chr6 | 116004239 | 116004239 | + | 0          | 0          | -26.23400366 |
| chr6 | 116004269 | 116004269 | + | 0          | 0          | -32.31703741 |
| chr6 | 116004270 | 116004270 | - | 0          | 0          | -27.33337915 |
| chr6 | 116004281 | 116004281 | + | 0          | 0          | -27.98783277 |
| chr6 | 116227856 | 116227856 | + | 0.00028622 | 0.00311123 | -32.42044862 |
| chr6 | 116227872 | 116227872 | + | 6.89E-08   | 1.74E-06   | -42.13250518 |
| chr6 | 117171518 | 117171518 | - | 0.00027457 | 0.00300376 | -36          |
| chr6 | 117997634 | 117997634 | - | 2.03E-07   | 4.75E-06   | -56.2745098  |
| chr6 | 119325345 | 119325345 | - | 2.66E-15   | 1.57E-13   | -26.99107004 |
| chr6 | 119330456 | 119330456 | - | 2.24E-05   | 0.00034064 | -31.30630631 |
| chr6 | 119346837 | 119346837 | - | 5.62E-06   | 9.87E-05   | -27.0995671  |
| chr6 | 119346856 | 119346856 | - | 5.81E-06   | 0.00010162 | -29.91452991 |
| chr6 | 119449509 | 119449509 | - | 0          | 0          | -30.18930222 |
| chr6 | 119483101 | 119483101 | - | 0          | 0          | -26.02846941 |
| chr6 | 119520858 | 119520858 | - | 0          | 0          | -25.15911064 |
| chr6 | 120202212 | 120202212 | + | 0          | 0          | -28.32224942 |
| chr6 | 120202225 | 120202225 | + | 0          | 0          | -45.52237684 |
| chr6 | 120202226 | 120202226 | - | 0          | 0          | -46.14313562 |
| chr6 | 120202265 | 120202265 | + | 0          | 0          | -36.61594739 |
| chr6 | 120202266 | 120202266 | - | 0          | 0          | -38.09084616 |
| chr6 | 120202268 | 120202268 | + | 0          | 0          | -50.50378877 |
| chr6 | 120202373 | 120202373 | - | 0          | 0          | -30.48456361 |
| chr6 | 120202386 | 120202386 | - | 0          | 0          | -29.57941367 |
| chr6 | 120202842 | 120202842 | + | 0.00054903 | 0.00537996 | -27.69277846 |
| chr6 | 120275477 | 120275477 | + | 7.18E-07   | 1.52E-05   | -26.54809497 |
| chr6 | 120462984 | 120462984 | + | 8.18E-12   | 3.43E-10   | -26.48263468 |
| chr6 | 120462994 | 120462994 | + | 1.32E-12   | 6.02E-11   | -28.07163163 |
| chr6 | 120463000 | 120463000 | + | 3.11E-15   | 1.82E-13   | -31.05810437 |
| chr6 | 120486005 | 120486005 | + | 1.65E-10   | 5.98E-09   | -32.17149578 |
| chr6 | 120492208 | 120492208 | + | 0          | 0          | -33.41299752 |
| chr6 | 120492241 | 120492241 | + | 0          | 0          | -33.7422277  |

|      |           |           |   |            |            |              |
|------|-----------|-----------|---|------------|------------|--------------|
| chr6 | 120644656 | 120644656 | - | 3.07E-06   | 5.72E-05   | -31.97264816 |
| chr6 | 121064288 | 121064288 | - | 0          | 0          | -30.32440056 |
| chr6 | 121086445 | 121086445 | + | 2.47E-07   | 5.70E-06   | -27.75579423 |
| chr6 | 121086452 | 121086452 | + | 0.00012651 | 0.00154464 | -28.85456534 |
| chr6 | 121086460 | 121086460 | + | 2.27E-07   | 5.26E-06   | -37.21979224 |
| chr6 | 121086510 | 121086510 | + | 2.22E-09   | 6.97E-08   | -29.64912281 |
| chr6 | 121300197 | 121300197 | - | 1.25E-08   | 3.53E-07   | -28.56296067 |
| chr6 | 122595861 | 122595861 | + | 9.74E-14   | 4.97E-12   | -31.75403226 |
| chr6 | 122595928 | 122595928 | - | 0          | 0          | -39.05811831 |
| chr6 | 122609784 | 122609784 | - | 1.31E-13   | 6.61E-12   | -25.81038647 |
| chr6 | 122628672 | 122628672 | + | 0          | 0          | -25.87185821 |
| chr6 | 122628673 | 122628673 | - | 0          | 0          | -29.66200223 |
| chr6 | 122628683 | 122628683 | + | 0          | 0          | -25.80958045 |
| chr6 | 122628684 | 122628684 | - | 0          | 0          | -28.58765782 |
| chr6 | 122628715 | 122628715 | - | 0          | 0          | -25.93684941 |
| chr6 | 122628731 | 122628731 | + | 6.77E-15   | 3.85E-13   | -26.85687989 |
| chr6 | 122628753 | 122628753 | + | 2.22E-16   | 1.43E-14   | -27.31498329 |
| chr6 | 122636771 | 122636771 | - | 4.92E-05   | 0.00068009 | -27.65151515 |
| chr6 | 122663151 | 122663151 | - | 0          | 0          | -35.1417606  |
| chr6 | 122663166 | 122663166 | - | 0          | 0          | -27.70304978 |
| chr6 | 122743730 | 122743730 | - | 2.47E-12   | 1.10E-10   | -36.84679132 |
| chr6 | 122743765 | 122743765 | - | 2.17E-08   | 5.92E-07   | -29.9912816  |
| chr6 | 122833567 | 122833567 | + | 0.00070325 | 0.00660615 | -26          |
| chr6 | 122919962 | 122919962 | - | 0          | 0          | -26.83539057 |
| chr6 | 124761403 | 124761403 | + | 8.74E-07   | 1.82E-05   | -25.5375     |
| chr6 | 124778978 | 124778978 | - | 0.00022657 | 0.00254849 | -44          |
| chr6 | 124778985 | 124778985 | - | 8.79E-08   | 2.18E-06   | -61.48148148 |
| chr6 | 124839776 | 124839776 | + | 0          | 0          | -30.73978371 |
| chr6 | 124839951 | 124839951 | + | 0          | 0          | -26.38548332 |
| chr6 | 124858364 | 124858364 | + | 6.62E-11   | 2.52E-09   | -32.17567568 |
| chr6 | 124858390 | 124858390 | + | 0          | 0          | -45.30360531 |
| chr6 | 124858498 | 124858498 | - | 1.35E-08   | 3.80E-07   | -32.99145299 |
| chr6 | 124858741 | 124858741 | - | 1.67E-15   | 9.99E-14   | -39.92200328 |
| chr6 | 124858747 | 124858747 | - | 6.64E-10   | 2.24E-08   | -29.82295831 |
| chr6 | 124858760 | 124858760 | + | 0          | 0          | -37.59056465 |
| chr6 | 124858761 | 124858761 | - | 0          | 0          | -35.62102039 |
| chr6 | 124858794 | 124858794 | + | 0          | 0          | -27.72540046 |
| chr6 | 124858795 | 124858795 | - | 0          | 0          | -30.12519799 |
| chr6 | 124858800 | 124858800 | - | 0          | 0          | -30.66900982 |
| chr6 | 124858807 | 124858807 | + | 0          | 0          | -25.93861329 |
| chr6 | 124858808 | 124858808 | - | 0          | 0          | -29.39581647 |

|      |           |           |   |            |            |              |
|------|-----------|-----------|---|------------|------------|--------------|
| chr6 | 124858826 | 124858826 | + | 0          | 0          | -26.35224522 |
| chr6 | 124858829 | 124858829 | + | 0          | 0          | -29.54822955 |
| chr6 | 124904490 | 124904490 | + | 0          | 0          | -29.30547907 |
| chr6 | 124904508 | 124904508 | + | 0          | 0          | -29.34588629 |
| chr6 | 124904509 | 124904509 | - | 0          | 0          | -34.84785036 |
| chr6 | 124904521 | 124904521 | + | 0          | 0          | -29.29572736 |
| chr6 | 124904522 | 124904522 | - | 0          | 0          | -27.80622962 |
| chr6 | 124904551 | 124904551 | - | 0          | 0          | -25.61037105 |
| chr6 | 124904918 | 124904918 | + | 0          | 0          | -26.25668535 |
| chr6 | 124915813 | 124915813 | - | 0          | 0          | -38.72834652 |
| chr6 | 124915837 | 124915837 | - | 0          | 0          | -48.50953895 |
| chr6 | 124915851 | 124915851 | + | 0.00042999 | 0.00438134 | -40.63492063 |
| chr6 | 124915852 | 124915852 | - | 0          | 0          | -33.34849111 |
| chr6 | 124915884 | 124915884 | + | 0.00104822 | 0.00917786 | -38.17460317 |
| chr6 | 125061597 | 125061597 | - | 0          | 0          | -27.47215025 |
| chr6 | 125073562 | 125073562 | - | 3.71E-08   | 9.78E-07   | -27.01249637 |
| chr6 | 125073577 | 125073577 | - | 1.97E-09   | 6.23E-08   | -28.63668979 |
| chr6 | 125080496 | 125080496 | + | 0          | 0          | -26.875762   |
| chr6 | 125080617 | 125080617 | - | 5.55E-16   | 3.46E-14   | -31.4065583  |
| chr6 | 125149265 | 125149265 | - | 0.00016622 | 0.00195522 | -25.77422577 |
| chr6 | 125321385 | 125321385 | + | 0          | 0          | -36.50296064 |
| chr6 | 125321402 | 125321402 | + | 0          | 0          | -45.04364359 |
| chr6 | 125321409 | 125321409 | + | 0          | 0          | -31.01532567 |
| chr6 | 125321554 | 125321554 | - | 1.44E-06   | 2.86E-05   | -31.38755981 |
| chr6 | 125321578 | 125321578 | - | 0          | 0          | -61.67013278 |
| chr6 | 125321587 | 125321587 | - | 5.07E-09   | 1.52E-07   | -38.85520252 |
| chr6 | 125322073 | 125322073 | + | 0          | 0          | -25.61458184 |
| chr6 | 125322105 | 125322105 | + | 0          | 0          | -26.96639719 |
| chr6 | 125322106 | 125322106 | - | 0          | 0          | -32.51463754 |
| chr6 | 125322125 | 125322125 | - | 0          | 0          | -38.01046884 |
| chr6 | 125343858 | 125343858 | + | 0.00048088 | 0.00481516 | -35.09070295 |
| chr6 | 125475260 | 125475260 | - | 7.42E-10   | 2.49E-08   | -34.52350207 |
| chr6 | 125540409 | 125540409 | + | 6.37E-10   | 2.15E-08   | -28.84157445 |
| chr6 | 125596695 | 125596695 | - | 0          | 0          | -34.8120069  |
| chr6 | 125963941 | 125963941 | + | 6.37E-05   | 0.00085263 | -36          |
| chr6 | 126533954 | 126533954 | - | 6.37E-10   | 2.15E-08   | -25.33296844 |
| chr6 | 126795781 | 126795781 | - | 0.00024688 | 0.00274282 | -28.20689655 |
| chr6 | 126921717 | 126921717 | - | 0          | 0          | -28.13139991 |
| chr6 | 126921744 | 126921744 | - | 0          | 0          | -28.88392534 |
| chr6 | 126921774 | 126921774 | + | 0.0001239  | 0.0015171  | -29.76554536 |
| chr6 | 127146029 | 127146029 | + | 0          | 0          | -52.05974843 |



|      |           |           |   |           |            |              |
|------|-----------|-----------|---|-----------|------------|--------------|
| chr6 | 127146038 | 127146038 | + | 0         | 0          | -53.63881402 |
| chr6 | 127146051 | 127146051 | + | 0         | 0          | -60.02109705 |
| chr6 | 127146061 | 127146061 | + | 1.11E-16  | 7.26E-15   | -47.80462185 |
| chr6 | 127251161 | 127251161 | + | 1.49E-09  | 4.78E-08   | -26.98701299 |
| chr6 | 127251340 | 127251340 | - | 0         | 0          | -38.33642897 |
| chr6 | 127251349 | 127251349 | - | 0         | 0          | -25.72737186 |
| chr6 | 127331006 | 127331006 | - | 0.0004979 | 0.00495691 | -25.87301587 |
| chr6 | 127337400 | 127337400 | + | 1.67E-15  | 9.99E-14   | -25.26724933 |
| chr6 | 127337450 | 127337450 | + | 0         | 0          | -25.91588599 |
| chr6 | 127337468 | 127337468 | - | 3.33E-16  | 2.11E-14   | -30.51565253 |
| chr6 | 127337518 | 127337518 | - | 2.11E-15  | 1.25E-13   | -27.85372123 |
| chr6 | 127581981 | 127581981 | + | 0         | 0          | -28.61952862 |
| chr6 | 127895223 | 127895223 | + | 1.24E-12  | 5.65E-11   | -29.29292929 |
| chr6 | 127956320 | 127956320 | + | 3.66E-09  | 1.12E-07   | -26.70885621 |
| chr6 | 128043775 | 128043775 | - | 0         | 0          | -25.85710036 |
| chr6 | 128065726 | 128065726 | + | 3.76E-05  | 0.00053624 | -38.88481291 |
| chr6 | 128093273 | 128093273 | + | 0         | 0          | -27.54723434 |
| chr6 | 128093322 | 128093322 | + | 0         | 0          | -31.99528892 |
| chr6 | 128093323 | 128093323 | - | 0         | 0          | -30.89275266 |
| chr6 | 128296650 | 128296650 | + | 2.22E-16  | 1.43E-14   | -28.69191681 |
| chr6 | 128296651 | 128296651 | - | 1.50E-14  | 8.25E-13   | -28.44178137 |
| chr6 | 128296770 | 128296770 | - | 0         | 0          | -28.10564931 |
| chr6 | 128297202 | 128297202 | + | 0         | 0          | -31.06016355 |
| chr6 | 128362018 | 128362018 | + | 1.30E-05  | 0.00020955 | -46.40522876 |
| chr6 | 128399890 | 128399890 | + | 1.31E-12  | 5.99E-11   | -26.83850702 |
| chr6 | 128399936 | 128399936 | + | 1.02E-13  | 5.20E-12   | -37.59018759 |
| chr6 | 128399938 | 128399938 | + | 3.66E-09  | 1.12E-07   | -31.5498455  |
| chr6 | 128479634 | 128479634 | - | 1.09E-07  | 2.67E-06   | -28.16901408 |
| chr6 | 128597522 | 128597522 | + | 1.11E-16  | 7.26E-15   | -25.00332859 |
| chr6 | 132642933 | 132642933 | + | 3.04E-06  | 5.66E-05   | 51.34952767  |
| chr6 | 134119176 | 134119176 | + | 6.36E-11  | 2.42E-09   | -32.73582313 |
| chr6 | 134119217 | 134119217 | - | 0         | 0          | -33.3283936  |
| chr6 | 134147770 | 134147770 | - | 2.69E-09  | 8.37E-08   | -25.03775059 |
| chr6 | 134148065 | 134148065 | + | 6.18E-06  | 0.00010746 | -31.39084507 |
| chr6 | 134148085 | 134148085 | + | 1.62E-06  | 3.20E-05   | -34.41140671 |
| chr6 | 134148093 | 134148093 | + | 1.76E-09  | 5.61E-08   | -42.34046253 |
| chr6 | 134251538 | 134251538 | + | 0         | 0          | -27.52862595 |
| chr6 | 134256575 | 134256575 | - | 0         | 0          | -30.95321637 |
| chr6 | 134263099 | 134263099 | + | 0         | 0          | -32.31132075 |
| chr6 | 134535265 | 134535265 | + | 3.27E-09  | 1.01E-07   | -26.52350795 |
| chr6 | 134887690 | 134887690 | - | 2.22E-16  | 1.43E-14   | -32.44709086 |

|      |           |           |   |          |          |              |
|------|-----------|-----------|---|----------|----------|--------------|
| chr6 | 135048669 | 135048669 | + | 2.64E-11 | 1.05E-09 | -26.62740365 |
| chr6 | 135180779 | 135180779 | - | 7.39E-14 | 3.81E-12 | -27.06325875 |
| chr6 | 136469171 | 136469171 | - | 0        | 0        | -28.51920742 |
| chr6 | 136469200 | 136469200 | + | 2.76E-07 | 6.30E-06 | -26.17707577 |
| chr6 | 136469246 | 136469246 | - | 0        | 0        | -27.03719295 |
| chr6 | 136470387 | 136470387 | + | 0        | 0        | -26.06310911 |
| chr6 | 136470530 | 136470530 | - | 0        | 0        | -27.7326927  |
| chr6 | 136807405 | 136807405 | + | 0        | 0        | -39.92458817 |
| chr6 | 136959126 | 136959126 | + | 0        | 0        | -27.92571103 |
| chr6 | 136959133 | 136959133 | + | 0        | 0        | -28.00041876 |
| chr6 | 137129753 | 137129753 | + | 0        | 0        | -49.27699638 |
| chr6 | 137129799 | 137129799 | + | 0        | 0        | -49.15690401 |
| chr6 | 137129800 | 137129800 | - | 0        | 0        | -52.55058115 |
| chr6 | 137129830 | 137129830 | - | 0        | 0        | -51.81521739 |
| chr6 | 140268650 | 140268650 | + | 0        | 0        | -27.78688996 |
| chr6 | 140707143 | 140707143 | + | 0        | 0        | -32.83759651 |
| chr6 | 140707205 | 140707205 | - | 0        | 0        | -31.70903955 |
| chr6 | 140707219 | 140707219 | - | 1.11E-16 | 7.26E-15 | -29.80838109 |
| chr6 | 140707249 | 140707249 | + | 0        | 0        | -28.62809019 |
| chr6 | 140707250 | 140707250 | - | 0        | 0        | -29.45719788 |
| chr6 | 140707276 | 140707276 | + | 0        | 0        | -39.24019393 |
| chr6 | 140707277 | 140707277 | - | 0        | 0        | -39.1210121  |
| chr6 | 140707291 | 140707291 | - | 0        | 0        | -33.04880066 |
| chr6 | 141250614 | 141250614 | - | 0        | 0        | -29.02964427 |
| chr6 | 142511877 | 142511877 | + | 1.51E-08 | 4.23E-07 | -27.96513831 |
| chr6 | 142511879 | 142511879 | + | 3.33E-12 | 1.46E-10 | -35.86900017 |
| chr6 | 142741670 | 142741670 | - | 8.34E-09 | 2.42E-07 | -26.44927536 |
| chr6 | 142963685 | 142963685 | - | 0        | 0        | -25.66458005 |
| chr6 | 142963739 | 142963739 | + | 0        | 0        | -26.87777477 |
| chr6 | 143135398 | 143135398 | - | 2.62E-07 | 6.01E-06 | -29.71290047 |
| chr6 | 143316115 | 143316115 | + | 0        | 0        | -28.86084919 |
| chr6 | 144273932 | 144273932 | - | 0        | 0        | -35.80731094 |
| chr6 | 144780144 | 144780144 | + | 0        | 0        | -28.96899278 |
| chr6 | 144783011 | 144783011 | - | 0        | 0        | -26.04187629 |
| chr6 | 145022485 | 145022485 | - | 0        | 0        | -30.02747725 |
| chr6 | 145022515 | 145022515 | - | 0        | 0        | -26.72369103 |
| chr6 | 145633993 | 145633993 | + | 1.92E-07 | 4.51E-06 | -47.6744186  |
| chr6 | 145815489 | 145815489 | + | 0        | 0        | -29.43721942 |
| chr6 | 145815490 | 145815490 | - | 0        | 0        | -25.71827472 |
| chr6 | 145815523 | 145815523 | + | 0        | 0        | -36.08134921 |
| chr6 | 145815524 | 145815524 | - | 0        | 0        | -28.12641894 |

|      |           |           |   |            |            |              |
|------|-----------|-----------|---|------------|------------|--------------|
| chr6 | 145862806 | 145862806 | + | 0          | 0          | -31.87241792 |
| chr6 | 146514796 | 146514796 | + | 0          | 0          | -29.81138505 |
| chr6 | 148354584 | 148354584 | + | 0          | 0          | -25.85094476 |
| chr6 | 148354585 | 148354585 | - | 0          | 0          | -30.14227303 |
| chr6 | 148354597 | 148354597 | + | 0          | 0          | -29.54625929 |
| chr6 | 148354598 | 148354598 | - | 0          | 0          | -29.26879085 |
| chr6 | 148354616 | 148354616 | - | 0          | 0          | -26.22003095 |
| chr6 | 148354633 | 148354633 | + | 0          | 0          | -28.49247527 |
| chr6 | 148354639 | 148354639 | + | 0          | 0          | -27.93873234 |
| chr6 | 148354641 | 148354641 | + | 0          | 0          | -33.47155096 |
| chr6 | 148354643 | 148354643 | + | 0          | 0          | -34.29274836 |
| chr6 | 148354650 | 148354650 | + | 0          | 0          | -29.32835178 |
| chr6 | 148354660 | 148354660 | + | 0          | 0          | -32.99512768 |
| chr6 | 148354741 | 148354741 | - | 0          | 0          | -31.36758139 |
| chr6 | 148354748 | 148354748 | - | 4.44E-16   | 2.79E-14   | -26.82695949 |
| chr6 | 148354756 | 148354756 | - | 0          | 0          | -27.57734412 |
| chr6 | 148354791 | 148354791 | - | 0.00021184 | 0.00240719 | -27.62770452 |
| chr6 | 148354793 | 148354793 | - | 2.47E-06   | 4.69E-05   | -35.53459119 |
| chr6 | 148354802 | 148354802 | - | 1.93E-05   | 0.00029825 | -29.37595129 |
| chr6 | 148354808 | 148354808 | + | 0          | 0          | -27.06917275 |
| chr6 | 148354813 | 148354813 | + | 0          | 0          | -30.06596622 |
| chr6 | 148354841 | 148354841 | + | 0          | 0          | -26.6031391  |
| chr6 | 148972203 | 148972203 | + | 0          | 0          | -27.99513066 |
| chr6 | 148972274 | 148972274 | + | 5.90E-05   | 0.0007974  | -26.94592989 |
| chr6 | 148982925 | 148982925 | + | 7.16E-11   | 2.71E-09   | -26.09615385 |
| chr6 | 149342919 | 149342919 | - | 0          | 0          | -31.94371777 |
| chr6 | 149342942 | 149342942 | - | 0          | 0          | -26.43692338 |
| chr7 | 3201449   | 3201449   | + | 0          | 0          | -27.42214113 |
| chr7 | 3201531   | 3201531   | - | 0          | 0          | -31.45936511 |
| chr7 | 3213907   | 3213907   | + | 4.44E-05   | 0.00062257 | -27.34580052 |
| chr7 | 3219392   | 3219392   | - | 2.19E-06   | 4.21E-05   | -25.86522703 |
| chr7 | 3219409   | 3219409   | - | 4.10E-09   | 1.24E-07   | -27.46552173 |
| chr7 | 3304261   | 3304261   | + | 0.00014201 | 0.00170746 | -27.08333333 |
| chr7 | 3304734   | 3304734   | + | 1.96E-06   | 3.80E-05   | -32.80228758 |
| chr7 | 3401065   | 3401065   | + | 4.09E-08   | 1.07E-06   | -29.86928105 |
| chr7 | 3412523   | 3412523   | - | 4.32E-06   | 7.78E-05   | -41.1826269  |
| chr7 | 3423421   | 3423421   | + | 0          | 0          | -32.97739008 |
| chr7 | 3423422   | 3423422   | - | 0          | 0          | -38.26951147 |
| chr7 | 3423426   | 3423426   | - | 0          | 0          | -25.16087971 |
| chr7 | 3424723   | 3424723   | - | 0          | 0          | -27.21788759 |
| chr7 | 3424726   | 3424726   | - | 0          | 0          | -26.83074087 |

|      |          |          |   |            |            |              |
|------|----------|----------|---|------------|------------|--------------|
| chr7 | 4707473  | 4707473  | + | 7.34E-12   | 3.09E-10   | -29.9372002  |
| chr7 | 4751731  | 4751731  | + | 1.20E-05   | 0.00019452 | -26.14133834 |
| chr7 | 4778158  | 4778158  | - | 0.00014643 | 0.0017534  | -27.8786431  |
| chr7 | 4844861  | 4844861  | + | 6.18E-06   | 0.00010739 | -32.55952381 |
| chr7 | 4845135  | 4845135  | + | 1.29E-05   | 0.00020798 | -44.82142857 |
| chr7 | 4993930  | 4993930  | - | 1.95E-07   | 4.56E-06   | -60.07905138 |
| chr7 | 5053574  | 5053574  | + | 0          | 0          | -32.4870119  |
| chr7 | 13043371 | 13043371 | + | 0          | 0          | -25.49220748 |
| chr7 | 13043382 | 13043382 | + | 0          | 0          | -28.42155738 |
| chr7 | 13043388 | 13043388 | + | 0          | 0          | -25.92976766 |
| chr7 | 13043456 | 13043456 | - | 0          | 0          | -32.8725088  |
| chr7 | 13043477 | 13043477 | + | 1.81E-05   | 0.00028074 | -26.7642715  |
| chr7 | 13043478 | 13043478 | - | 4.19E-05   | 0.00059091 | -27.15846177 |
| chr7 | 13043486 | 13043486 | - | 8.69E-06   | 0.00014594 | -29.26829268 |
| chr7 | 13261209 | 13261209 | + | 0          | 0          | -31.77522912 |
| chr7 | 13261257 | 13261257 | + | 0          | 0          | -29.96657436 |
| chr7 | 13261313 | 13261313 | - | 0          | 0          | -33.32003434 |
| chr7 | 13261322 | 13261322 | - | 0          | 0          | -30.1531242  |
| chr7 | 13261386 | 13261386 | - | 0          | 0          | -25.78511151 |
| chr7 | 13261438 | 13261438 | + | 0          | 0          | -26.91342237 |
| chr7 | 13261445 | 13261445 | + | 0          | 0          | -26.83470622 |
| chr7 | 13261475 | 13261475 | + | 0          | 0          | -25.2296089  |
| chr7 | 15565084 | 15565084 | + | 1.01E-05   | 0.00016683 | 32.22477064  |
| chr7 | 16225028 | 16225028 | + | 0          | 0          | -26.52771822 |
| chr7 | 16280719 | 16280719 | + | 0          | 0          | -29.3464319  |
| chr7 | 16297254 | 16297254 | - | 0.0003669  | 0.00383664 | -28.42052314 |
| chr7 | 16426286 | 16426286 | + | 0.00011393 | 0.0014104  | -33.6026936  |
| chr7 | 16433036 | 16433036 | - | 1.09E-05   | 0.00017949 | -26.74409891 |
| chr7 | 16858503 | 16858503 | - | 0          | 0          | -30.63403782 |
| chr7 | 16885672 | 16885672 | + | 1.66E-11   | 6.75E-10   | -32.29665072 |
| chr7 | 17060906 | 17060906 | + | 0          | 0          | -29.72505582 |
| chr7 | 17610885 | 17610885 | + | 3.68E-07   | 8.22E-06   | 37.30025231  |
| chr7 | 18893174 | 18893174 | + | 8.02E-09   | 2.33E-07   | -27.07186727 |
| chr7 | 19000341 | 19000341 | + | 4.44E-13   | 2.12E-11   | -26.55608755 |
| chr7 | 19004965 | 19004965 | + | 0          | 0          | -29.43601137 |
| chr7 | 19004975 | 19004975 | + | 0          | 0          | -27.23599633 |
| chr7 | 19005051 | 19005051 | - | 0          | 0          | -31.74143325 |
| chr7 | 19005083 | 19005083 | - | 0          | 0          | -26.25812921 |
| chr7 | 19005109 | 19005109 | + | 0          | 0          | -26.08169678 |
| chr7 | 19009783 | 19009783 | + | 0          | 0          | -28.48934454 |
| chr7 | 19009791 | 19009791 | + | 0          | 0          | -26.98528833 |

|      |          |          |   |            |            |              |
|------|----------|----------|---|------------|------------|--------------|
| chr7 | 19009894 | 19009894 | - | 0          | 0          | -41.732546   |
| chr7 | 19009925 | 19009925 | - | 0          | 0          | -36.05444941 |
| chr7 | 19009934 | 19009934 | - | 0          | 0          | -29.70901279 |
| chr7 | 19021250 | 19021250 | - | 0          | 0          | -28.35448139 |
| chr7 | 19021277 | 19021277 | - | 0          | 0          | -36.536766   |
| chr7 | 19021281 | 19021281 | - | 0          | 0          | -25.99177465 |
| chr7 | 19022317 | 19022317 | + | 0          | 0          | -29.23170649 |
| chr7 | 19022934 | 19022934 | + | 0          | 0          | -29.17748918 |
| chr7 | 19022953 | 19022953 | + | 1.02E-10   | 3.81E-09   | -28.61607235 |
| chr7 | 19023330 | 19023330 | - | 0          | 0          | -38.96098726 |
| chr7 | 19054185 | 19054185 | + | 1.79E-06   | 3.50E-05   | -30.45977011 |
| chr7 | 19054205 | 19054205 | + | 3.61E-07   | 8.06E-06   | -26.13636364 |
| chr7 | 19054206 | 19054206 | - | 1.73E-10   | 6.26E-09   | -32.15277778 |
| chr7 | 19054214 | 19054214 | - | 2.55E-05   | 0.00038099 | -27.81562417 |
| chr7 | 19091786 | 19091786 | + | 0          | 0          | -36.5910523  |
| chr7 | 19091801 | 19091801 | + | 0          | 0          | -40.55012933 |
| chr7 | 19091802 | 19091802 | - | 0          | 0          | -39.53870566 |
| chr7 | 19091803 | 19091803 | + | 0          | 0          | -47.48499964 |
| chr7 | 19091804 | 19091804 | - | 0          | 0          | -38.04726089 |
| chr7 | 19091820 | 19091820 | - | 0          | 0          | -32.16860427 |
| chr7 | 19118444 | 19118444 | - | 7.24E-13   | 3.39E-11   | -28.46903731 |
| chr7 | 19291132 | 19291132 | + | 1.22E-12   | 5.59E-11   | -29.62068966 |
| chr7 | 19291136 | 19291136 | + | 3.72E-07   | 8.29E-06   | -27.17615419 |
| chr7 | 19291146 | 19291146 | + | 2.35E-06   | 4.49E-05   | -27.21010333 |
| chr7 | 19307715 | 19307715 | - | 2.00E-05   | 0.00030711 | -54.81481481 |
| chr7 | 19369823 | 19369823 | + | 0.00011195 | 0.00138934 | -31.40730238 |
| chr7 | 19464615 | 19464615 | + | 0          | 0          | -43.10641764 |
| chr7 | 19464645 | 19464645 | + | 0          | 0          | -29.73819698 |
| chr7 | 19464734 | 19464734 | + | 0          | 0          | -45.54722639 |
| chr7 | 19464771 | 19464771 | + | 0          | 0          | -37.97979798 |
| chr7 | 19464772 | 19464772 | - | 0          | 0          | -40.07607747 |
| chr7 | 19464928 | 19464928 | - | 0          | 0          | -44.84320557 |
| chr7 | 19464953 | 19464953 | + | 0          | 0          | -36.22343795 |
| chr7 | 19464954 | 19464954 | - | 4.32E-12   | 1.87E-10   | -37.91005291 |
| chr7 | 19464970 | 19464970 | + | 0          | 0          | -37.68814225 |
| chr7 | 19464990 | 19464990 | + | 0          | 0          | -36.0173799  |
| chr7 | 19506866 | 19506866 | + | 0          | 0          | -36.56299301 |
| chr7 | 19506874 | 19506874 | + | 0          | 0          | -25.89565591 |
| chr7 | 19506884 | 19506884 | + | 0          | 0          | -28.92550459 |
| chr7 | 19619476 | 19619476 | + | 0          | 0          | -28.0556765  |
| chr7 | 19619523 | 19619523 | - | 0          | 0          | -26.16971727 |

|      |          |          |   |            |            |              |
|------|----------|----------|---|------------|------------|--------------|
| chr7 | 19619570 | 19619570 | + | 0          | 0          | -29.81527094 |
| chr7 | 19619574 | 19619574 | + | 0          | 0          | -41.46199172 |
| chr7 | 19619578 | 19619578 | + | 0          | 0          | -41.50312058 |
| chr7 | 19619585 | 19619585 | + | 0          | 0          | -40.61081114 |
| chr7 | 19619591 | 19619591 | + | 0          | 0          | -33.19271577 |
| chr7 | 19619596 | 19619596 | + | 0          | 0          | -34.4840791  |
| chr7 | 19619602 | 19619602 | + | 0          | 0          | -39.16125234 |
| chr7 | 19619611 | 19619611 | + | 0          | 0          | -34.2524615  |
| chr7 | 19619612 | 19619612 | - | 0          | 0          | -32.61671402 |
| chr7 | 19619644 | 19619644 | - | 0          | 0          | -35.46951317 |
| chr7 | 19619648 | 19619648 | - | 0          | 0          | -34.72436951 |
| chr7 | 19619656 | 19619656 | - | 0          | 0          | -25.88751124 |
| chr7 | 19619660 | 19619660 | + | 2.49E-09   | 7.78E-08   | -63.99099775 |
| chr7 | 19619661 | 19619661 | - | 0          | 0          | -37.07722815 |
| chr7 | 19619698 | 19619698 | - | 0.00043796 | 0.00444991 | -25.74074074 |
| chr7 | 19619701 | 19619701 | - | 3.08E-06   | 5.74E-05   | -35.4517134  |
| chr7 | 19619707 | 19619707 | - | 5.20E-06   | 9.20E-05   | -35.46312178 |
| chr7 | 19701565 | 19701565 | - | 5.87E-10   | 1.99E-08   | -27.36867548 |
| chr7 | 19701598 | 19701598 | + | 6.88E-15   | 3.91E-13   | -26.30873768 |
| chr7 | 19785239 | 19785239 | - | 0          | 0          | -26.43694231 |
| chr7 | 19796385 | 19796385 | + | 0          | 0          | -33.34643799 |
| chr7 | 19796470 | 19796470 | + | 0          | 0          | -28.79915076 |
| chr7 | 19796595 | 19796595 | + | 5.81E-13   | 2.75E-11   | -28.42809365 |
| chr7 | 19796596 | 19796596 | - | 0          | 0          | -33.1990672  |
| chr7 | 19796627 | 19796627 | + | 0          | 0          | -28.01882983 |
| chr7 | 19796634 | 19796634 | + | 0          | 0          | -31.85101321 |
| chr7 | 19811300 | 19811300 | + | 0          | 0          | -39.49772672 |
| chr7 | 19811328 | 19811328 | + | 0          | 0          | -35.12747415 |
| chr7 | 19811329 | 19811329 | - | 0          | 0          | -33.42101818 |
| chr7 | 19811335 | 19811335 | + | 0          | 0          | -32.67850439 |
| chr7 | 19811336 | 19811336 | - | 0          | 0          | -31.35320722 |
| chr7 | 19811337 | 19811337 | + | 0          | 0          | -31.62808376 |
| chr7 | 19811338 | 19811338 | - | 0          | 0          | -31.20797481 |
| chr7 | 19811342 | 19811342 | + | 0          | 0          | -34.29864162 |
| chr7 | 19811343 | 19811343 | - | 0          | 0          | -36.71897224 |
| chr7 | 19811376 | 19811376 | + | 0          | 0          | -35.05779313 |
| chr7 | 19811377 | 19811377 | - | 0          | 0          | -38.91132514 |
| chr7 | 19811385 | 19811385 | + | 0          | 0          | -40.31520037 |
| chr7 | 19811391 | 19811391 | + | 0          | 0          | -42.47450349 |
| chr7 | 19811443 | 19811443 | + | 0          | 0          | -49.42075623 |
| chr7 | 19811444 | 19811444 | - | 0          | 0          | -45.82824583 |

|      |          |          |   |            |            |              |
|------|----------|----------|---|------------|------------|--------------|
| chr7 | 19847487 | 19847487 | - | 9.62E-12   | 4.01E-10   | -29.16898741 |
| chr7 | 19950171 | 19950171 | + | 0          | 0          | -26.3347661  |
| chr7 | 19950172 | 19950172 | - | 5.94E-11   | 2.27E-09   | -44.13763806 |
| chr7 | 19950203 | 19950203 | + | 0          | 0          | -31.00218863 |
| chr7 | 21205372 | 21205372 | + | 0.00016746 | 0.00196787 | 36.61835749  |
| chr7 | 24377055 | 24377055 | + | 0          | 0          | -36.42876173 |
| chr7 | 24377120 | 24377120 | - | 0          | 0          | -32.05131182 |
| chr7 | 24377126 | 24377126 | + | 4.17E-13   | 2.00E-11   | -36.80695606 |
| chr7 | 24377150 | 24377150 | + | 9.99E-16   | 6.10E-14   | -35.53506036 |
| chr7 | 24377155 | 24377155 | + | 1.04E-13   | 5.29E-12   | -25.04546373 |
| chr7 | 24377193 | 24377193 | - | 0          | 0          | -35.63329335 |
| chr7 | 24377200 | 24377200 | - | 0          | 0          | -39.12880267 |
| chr7 | 24377212 | 24377212 | - | 0          | 0          | -40.29784893 |
| chr7 | 24377217 | 24377217 | - | 0          | 0          | -47.66005122 |
| chr7 | 24377223 | 24377223 | + | 0          | 0          | -42.19195871 |
| chr7 | 24377224 | 24377224 | - | 0          | 0          | -40.97157451 |
| chr7 | 24377244 | 24377244 | + | 0          | 0          | -42.41900281 |
| chr7 | 24377301 | 24377301 | - | 0          | 0          | -43.52030948 |
| chr7 | 24377308 | 24377308 | - | 0          | 0          | -44.89311052 |
| chr7 | 24377317 | 24377317 | - | 1.02E-12   | 4.71E-11   | -47.45021296 |
| chr7 | 24377324 | 24377324 | - | 4.05E-14   | 2.14E-12   | -46.30933454 |
| chr7 | 24377331 | 24377331 | + | 0          | 0          | -31.0978283  |
| chr7 | 24377332 | 24377332 | - | 6.93E-08   | 1.75E-06   | -25.89903954 |
| chr7 | 24377334 | 24377334 | + | 0          | 0          | -47.31215425 |
| chr7 | 24377335 | 24377335 | - | 0          | 0          | -44.97504805 |
| chr7 | 24377344 | 24377344 | + | 0          | 0          | -48.98893123 |
| chr7 | 24377345 | 24377345 | - | 0          | 0          | -46.08490586 |
| chr7 | 24377372 | 24377372 | + | 0          | 0          | -53.75124067 |
| chr7 | 24377373 | 24377373 | - | 0          | 0          | -53.69083085 |
| chr7 | 24377383 | 24377383 | + | 0          | 0          | -36.17517146 |
| chr7 | 24377384 | 24377384 | - | 0          | 0          | -34.39564254 |
| chr7 | 24377394 | 24377394 | + | 0          | 0          | -47.86084766 |
| chr7 | 24377401 | 24377401 | + | 0          | 0          | -49.5437628  |
| chr7 | 24377402 | 24377402 | - | 0          | 0          | -44.78501878 |
| chr7 | 24377408 | 24377408 | + | 0          | 0          | -46.62330289 |
| chr7 | 24377409 | 24377409 | - | 0          | 0          | -44.89735313 |
| chr7 | 24377416 | 24377416 | + | 0          | 0          | -49.19268155 |
| chr7 | 24377417 | 24377417 | - | 0          | 0          | -47.55210627 |
| chr7 | 24377429 | 24377429 | + | 0          | 0          | -28.35895675 |
| chr7 | 24377430 | 24377430 | - | 0          | 0          | -30.82189019 |
| chr7 | 24377432 | 24377432 | + | 0          | 0          | -37.95430298 |

|      |          |          |   |           |            |              |
|------|----------|----------|---|-----------|------------|--------------|
| chr7 | 24377433 | 24377433 | - | 0         | 0          | -50.04361041 |
| chr7 | 24377435 | 24377435 | - | 0         | 0          | -49.3095345  |
| chr7 | 24377446 | 24377446 | + | 0         | 0          | -46.22377991 |
| chr7 | 24377447 | 24377447 | - | 0         | 0          | -40.56529797 |
| chr7 | 24377459 | 24377459 | + | 0         | 0          | -43.85327165 |
| chr7 | 24377465 | 24377465 | + | 0         | 0          | -50.29126214 |
| chr7 | 24377470 | 24377470 | + | 0         | 0          | -55.76314517 |
| chr7 | 24377496 | 24377496 | + | 0         | 0          | -55.61031519 |
| chr7 | 24377587 | 24377587 | - | 0         | 0          | -28.49803481 |
| chr7 | 24377604 | 24377604 | - | 0         | 0          | -55.2853643  |
| chr7 | 24377627 | 24377627 | - | 0         | 0          | -39.86922583 |
| chr7 | 24377633 | 24377633 | - | 0         | 0          | -42.13284019 |
| chr7 | 24378447 | 24378447 | - | 0.0002432 | 0.00270796 | -53.07692308 |
| chr7 | 24391005 | 24391005 | + | 0         | 0          | -25.7169238  |
| chr7 | 24432527 | 24432527 | - | 3.22E-08  | 8.57E-07   | -28.04981452 |
| chr7 | 24585994 | 24585994 | - | 0         | 0          | -28.41262232 |
| chr7 | 24586052 | 24586052 | - | 7.20E-06  | 0.00012327 | -29.38120703 |
| chr7 | 24586067 | 24586067 | - | 6.20E-07  | 1.33E-05   | -32.72164652 |
| chr7 | 24594559 | 24594559 | - | 0         | 0          | -31.36830395 |
| chr7 | 24594605 | 24594605 | + | 0         | 0          | -41.65888162 |
| chr7 | 24594606 | 24594606 | - | 0         | 0          | -33.90377079 |
| chr7 | 24594614 | 24594614 | + | 2.22E-16  | 1.43E-14   | -32.4803374  |
| chr7 | 24594639 | 24594639 | + | 0         | 0          | -44.56853608 |
| chr7 | 24595032 | 24595032 | - | 0         | 0          | -27.13892195 |
| chr7 | 24612936 | 24612936 | + | 0         | 0          | -28.13111717 |
| chr7 | 24612954 | 24612954 | + | 0         | 0          | -33.73327402 |
| chr7 | 24612972 | 24612972 | + | 0         | 0          | -31.36778597 |
| chr7 | 24613006 | 24613006 | - | 0         | 0          | -34.99089735 |
| chr7 | 24613029 | 24613029 | - | 0         | 0          | -32.28064473 |
| chr7 | 24636457 | 24636457 | - | 0         | 0          | -32.94946027 |
| chr7 | 24636461 | 24636461 | - | 0         | 0          | -38.96034473 |
| chr7 | 24636567 | 24636567 | + | 0         | 0          | -30.70588321 |
| chr7 | 24636569 | 24636569 | + | 0         | 0          | -27.9038162  |
| chr7 | 24636638 | 24636638 | - | 7.99E-15  | 4.51E-13   | -25.44778388 |
| chr7 | 24636657 | 24636657 | + | 0         | 0          | -28.942363   |
| chr7 | 24637165 | 24637165 | - | 0         | 0          | -26.66429005 |
| chr7 | 24719093 | 24719093 | - | 3.30E-06  | 6.11E-05   | -25.15017568 |
| chr7 | 24951289 | 24951289 | + | 0         | 0          | -29.80587121 |
| chr7 | 24951322 | 24951322 | + | 0         | 0          | -34.78235753 |
| chr7 | 24951333 | 24951333 | + | 0         | 0          | -25.19670645 |
| chr7 | 24951441 | 24951441 | + | 0         | 0          | -29.0186169  |



|      |          |          |   |            |            |              |
|------|----------|----------|---|------------|------------|--------------|
| chr7 | 24951467 | 24951467 | - | 0          | 0          | -25.69546539 |
| chr7 | 24952629 | 24952629 | + | 0          | 0          | -27.9493466  |
| chr7 | 25069631 | 25069631 | - | 2.22E-16   | 1.43E-14   | -26.62421797 |
| chr7 | 25069637 | 25069637 | - | 0          | 0          | -27.0012689  |
| chr7 | 25106960 | 25106960 | + | 2.00E-15   | 1.19E-13   | -30.81421502 |
| chr7 | 25121090 | 25121090 | - | 0.00029194 | 0.00316325 | -31.31955485 |
| chr7 | 25121631 | 25121631 | + | 0          | 0          | -33.43241311 |
| chr7 | 25121678 | 25121678 | + | 0          | 0          | -45.96605441 |
| chr7 | 25121709 | 25121709 | - | 0          | 0          | -38.38066832 |
| chr7 | 25121731 | 25121731 | - | 0          | 0          | -34.30026839 |
| chr7 | 25134811 | 25134811 | + | 0          | 0          | -25.89585566 |
| chr7 | 25134812 | 25134812 | - | 0          | 0          | -26.65532569 |
| chr7 | 25134852 | 25134852 | + | 0          | 0          | -27.98851052 |
| chr7 | 25134853 | 25134853 | - | 0          | 0          | -26.84821472 |
| chr7 | 25134864 | 25134864 | - | 0          | 0          | -27.53716738 |
| chr7 | 25134895 | 25134895 | + | 0          | 0          | -26.26895118 |
| chr7 | 25134896 | 25134896 | - | 0          | 0          | -26.13711961 |
| chr7 | 25134939 | 25134939 | + | 0          | 0          | -32.82206049 |
| chr7 | 25156318 | 25156318 | - | 3.28E-06   | 6.07E-05   | -35.81081081 |
| chr7 | 25156352 | 25156352 | - | 3.42E-06   | 6.30E-05   | -36.10689341 |
| chr7 | 25317346 | 25317346 | + | 0          | 0          | -33.56251794 |
| chr7 | 25317347 | 25317347 | - | 0          | 0          | -30.13192265 |
| chr7 | 25317364 | 25317364 | - | 0          | 0          | -28.18968118 |
| chr7 | 25326320 | 25326320 | + | 0          | 0          | -26.30519831 |
| chr7 | 25326384 | 25326384 | - | 0          | 0          | -33.07608011 |
| chr7 | 25326398 | 25326398 | - | 0          | 0          | -29.46815621 |
| chr7 | 25326463 | 25326463 | - | 0          | 0          | -28.38831479 |
| chr7 | 25326471 | 25326471 | - | 0          | 0          | -31.51003083 |
| chr7 | 25326512 | 25326512 | - | 0          | 0          | -29.73582869 |
| chr7 | 25333683 | 25333683 | + | 0          | 0          | -30.12813004 |
| chr7 | 25376909 | 25376909 | - | 2.28E-05   | 0.00034478 | -29.05982906 |
| chr7 | 25628150 | 25628150 | + | 0          | 0          | -27.17821815 |
| chr7 | 25628156 | 25628156 | + | 0          | 0          | -26.79028298 |
| chr7 | 25628657 | 25628657 | + | 0          | 0          | -27.27120385 |
| chr7 | 25704949 | 25704949 | - | 2.48E-10   | 8.81E-09   | -26.04688439 |
| chr7 | 25707637 | 25707637 | + | 7.79E-13   | 3.63E-11   | -25.66586777 |
| chr7 | 25707678 | 25707678 | + | 0          | 0          | -37.3075546  |
| chr7 | 25707679 | 25707679 | - | 0          | 0          | -37.77867816 |
| chr7 | 25707685 | 25707685 | + | 7.11E-15   | 4.03E-13   | -29.10570067 |
| chr7 | 25707712 | 25707712 | - | 0          | 0          | -25.65100119 |
| chr7 | 25722222 | 25722222 | - | 6.31E-12   | 2.68E-10   | -38.21793137 |

|      |          |          |   |            |            |              |
|------|----------|----------|---|------------|------------|--------------|
| chr7 | 25763958 | 25763958 | - | 0          | 0          | -31.63664934 |
| chr7 | 25763963 | 25763963 | - | 0          | 0          | -31.62214968 |
| chr7 | 25788159 | 25788159 | + | 6.05E-05   | 0.00081497 | -33.12693498 |
| chr7 | 25860133 | 25860133 | + | 0          | 0          | -35.69349778 |
| chr7 | 27180245 | 27180245 | + | 0.0001482  | 0.00177156 | -27.31601732 |
| chr7 | 27281884 | 27281884 | - | 1.11E-09   | 3.65E-08   | -41.21568627 |
| chr7 | 27281889 | 27281889 | - | 0.00011321 | 0.00140274 | -28.12177503 |
| chr7 | 27281894 | 27281894 | - | 4.10E-05   | 0.00058041 | -27.73477812 |
| chr7 | 27365679 | 27365679 | + | 0.00063216 | 0.00604869 | -35.71428571 |
| chr7 | 27365716 | 27365716 | + | 8.21E-05   | 0.00106231 | -39.79591837 |
| chr7 | 27434237 | 27434237 | + | 1.29E-09   | 4.20E-08   | -30.74935401 |
| chr7 | 27446087 | 27446087 | - | 7.65E-10   | 2.56E-08   | -25.10705899 |
| chr7 | 27596934 | 27596934 | + | 0          | 0          | -39.60992681 |
| chr7 | 27596935 | 27596935 | - | 0          | 0          | -29.67745055 |
| chr7 | 28221434 | 28221434 | - | 0.00030402 | 0.00327446 | 27.56286267  |
| chr7 | 28374732 | 28374732 | + | 2.01E-09   | 6.36E-08   | -46.10095327 |
| chr7 | 28374756 | 28374756 | + | 7.33E-07   | 1.55E-05   | -33.0221519  |
| chr7 | 28385971 | 28385971 | + | 0          | 0          | -25.62168889 |
| chr7 | 28467168 | 28467168 | + | 0          | 0          | -29.72549616 |
| chr7 | 28467175 | 28467175 | + | 0          | 0          | -26.76644622 |
| chr7 | 28467184 | 28467184 | + | 0          | 0          | -32.838275   |
| chr7 | 28467188 | 28467188 | + | 0          | 0          | -28.72401809 |
| chr7 | 28467215 | 28467215 | + | 0          | 0          | -32.37654736 |
| chr7 | 28467216 | 28467216 | - | 0          | 0          | -30.0112456  |
| chr7 | 28467225 | 28467225 | - | 0          | 0          | -37.35950465 |
| chr7 | 28467542 | 28467542 | + | 3.08E-14   | 1.64E-12   | -47.02404415 |
| chr7 | 28467571 | 28467571 | + | 6.23E-10   | 2.11E-08   | -38.18793559 |
| chr7 | 28467573 | 28467573 | + | 2.74E-09   | 8.50E-08   | -37.14285714 |
| chr7 | 28467575 | 28467575 | + | 2.06E-08   | 5.66E-07   | -32.95454545 |
| chr7 | 28544236 | 28544236 | - | 0          | 0          | -33.96839213 |
| chr7 | 28593667 | 28593667 | + | 2.68E-06   | 5.06E-05   | -25.37343358 |
| chr7 | 28593914 | 28593914 | + | 0          | 0          | -25.52530331 |
| chr7 | 28675797 | 28675797 | + | 8.17E-13   | 3.80E-11   | -26.48000671 |
| chr7 | 28693064 | 28693064 | - | 0          | 0          | -31.73312165 |
| chr7 | 28693077 | 28693077 | - | 0          | 0          | -31.83752418 |
| chr7 | 28693114 | 28693114 | + | 4.76E-06   | 8.49E-05   | -35.39719626 |
| chr7 | 28693282 | 28693282 | - | 4.61E-11   | 1.78E-09   | -38.03986711 |
| chr7 | 28693287 | 28693287 | - | 1.29E-12   | 5.91E-11   | -36.21572906 |
| chr7 | 28693289 | 28693289 | - | 3.06E-10   | 1.08E-08   | -30.7292392  |
| chr7 | 28732601 | 28732601 | - | 0          | 0          | -38.81509086 |
| chr7 | 28732606 | 28732606 | - | 0          | 0          | -27.73853668 |

|      |          |          |   |            |            |              |
|------|----------|----------|---|------------|------------|--------------|
| chr7 | 28732621 | 28732621 | - | 0          | 0          | -25.15891473 |
| chr7 | 28832325 | 28832325 | - | 3.37E-11   | 1.32E-09   | -31.10923423 |
| chr7 | 28887556 | 28887556 | + | 3.96E-07   | 8.78E-06   | -27.37236033 |
| chr7 | 28887951 | 28887951 | + | 0          | 0          | -25.01432052 |
| chr7 | 28888000 | 28888000 | - | 0          | 0          | -27.07546332 |
| chr7 | 29013592 | 29013592 | + | 0.00028113 | 0.00306525 | -31.81598063 |
| chr7 | 29043951 | 29043951 | + | 0.00079648 | 0.00732326 | -35.62091503 |
| chr7 | 29135438 | 29135438 | + | 0          | 0          | -32.36625514 |
| chr7 | 29168590 | 29168590 | - | 0          | 0          | -32.36920015 |
| chr7 | 29168623 | 29168623 | + | 0          | 0          | -37.80862442 |
| chr7 | 29168624 | 29168624 | - | 0          | 0          | -45.37254902 |
| chr7 | 29168630 | 29168630 | + | 0          | 0          | -38.22893537 |
| chr7 | 29168631 | 29168631 | - | 0          | 0          | -32.14419917 |
| chr7 | 29172015 | 29172015 | + | 6.29E-11   | 2.40E-09   | -26.37550985 |
| chr7 | 29172207 | 29172207 | - | 5.77E-09   | 1.72E-07   | -26.96078431 |
| chr7 | 29172227 | 29172227 | - | 2.46E-08   | 6.67E-07   | -25.90151003 |
| chr7 | 29172868 | 29172868 | + | 0          | 0          | -28.41271652 |
| chr7 | 29172869 | 29172869 | - | 0          | 0          | -26.25226388 |
| chr7 | 29172898 | 29172898 | + | 0          | 0          | -40.83332989 |
| chr7 | 29172899 | 29172899 | - | 0          | 0          | -37.03924945 |
| chr7 | 29172905 | 29172905 | + | 0          | 0          | -38.55659197 |
| chr7 | 29172906 | 29172906 | - | 0          | 0          | -38.14454761 |
| chr7 | 29172912 | 29172912 | - | 0          | 0          | -34.33475756 |
| chr7 | 29172918 | 29172918 | - | 0          | 0          | -31.28777986 |
| chr7 | 29212632 | 29212632 | + | 0          | 0          | -31.07509258 |
| chr7 | 29212657 | 29212657 | + | 0          | 0          | -33.30009473 |
| chr7 | 29212680 | 29212680 | + | 0          | 0          | -32.58985122 |
| chr7 | 29212730 | 29212730 | - | 0          | 0          | -40.04942531 |
| chr7 | 29212776 | 29212776 | - | 0          | 0          | -29.57026794 |
| chr7 | 29212801 | 29212801 | + | 0          | 0          | -29.58249625 |
| chr7 | 29212919 | 29212919 | + | 0          | 0          | -27.26543796 |
| chr7 | 29212920 | 29212920 | - | 0          | 0          | -25.11548227 |
| chr7 | 29212929 | 29212929 | + | 0          | 0          | -27.81906987 |
| chr7 | 29212932 | 29212932 | + | 0          | 0          | -25.86345224 |
| chr7 | 29212937 | 29212937 | + | 0          | 0          | -33.5578015  |
| chr7 | 29212950 | 29212950 | + | 0          | 0          | -29.88785734 |
| chr7 | 29306630 | 29306630 | - | 0.00032707 | 0.00348248 | -38.08933002 |
| chr7 | 29453648 | 29453648 | + | 0          | 0          | -33.41675811 |
| chr7 | 29453665 | 29453665 | + | 0          | 0          | -38.01376859 |
| chr7 | 29453666 | 29453666 | - | 1.38E-09   | 4.46E-08   | -33.892372   |
| chr7 | 29453714 | 29453714 | - | 0          | 0          | -34.34646941 |

|      |          |          |   |            |            |              |
|------|----------|----------|---|------------|------------|--------------|
| chr7 | 29792927 | 29792927 | - | 4.39E-07   | 9.65E-06   | -34.17989418 |
| chr7 | 29793216 | 29793216 | + | 0          | 0          | -26.49578017 |
| chr7 | 29965472 | 29965472 | + | 0          | 0          | -28.83264568 |
| chr7 | 29965482 | 29965482 | + | 0          | 0          | -25.73369565 |
| chr7 | 30468088 | 30468088 | + | 0.00036108 | 0.00378569 | -31.15003808 |
| chr7 | 30608968 | 30608968 | - | 1.93E-08   | 5.31E-07   | -25.11801242 |
| chr7 | 30633750 | 30633750 | - | 8.98E-05   | 0.00114893 | -25.64102564 |
| chr7 | 30781603 | 30781603 | - | 0          | 0          | -35.95335091 |
| chr7 | 30781614 | 30781614 | - | 0          | 0          | -33.04563466 |
| chr7 | 30787947 | 30787947 | + | 0          | 0          | -27.95045045 |
| chr7 | 30788013 | 30788013 | - | 0          | 0          | -31.30236973 |
| chr7 | 30855530 | 30855530 | - | 4.38E-08   | 1.14E-06   | -50.27777778 |
| chr7 | 30917000 | 30917000 | - | 0          | 0          | -25.38091192 |
| chr7 | 30972669 | 30972669 | - | 1.22E-07   | 2.95E-06   | -32.92046936 |
| chr7 | 30972842 | 30972842 | - | 0          | 0          | -38.08398624 |
| chr7 | 30972851 | 30972851 | - | 0          | 0          | -34.47489426 |
| chr7 | 30972858 | 30972858 | + | 8.62E-14   | 4.42E-12   | -32.05244755 |
| chr7 | 30972859 | 30972859 | - | 0          | 0          | -46.38224394 |
| chr7 | 30972867 | 30972867 | + | 0          | 0          | -36.58209298 |
| chr7 | 30972966 | 30972966 | - | 0          | 0          | -33.68279827 |
| chr7 | 30972987 | 30972987 | - | 0          | 0          | -28.86888229 |
| chr7 | 30973037 | 30973037 | + | 0          | 0          | -33.01560734 |
| chr7 | 30973045 | 30973045 | + | 0          | 0          | -40.12438749 |
| chr7 | 31009119 | 31009119 | + | 6.30E-13   | 2.97E-11   | -25.67102944 |
| chr7 | 31009143 | 31009143 | + | 4.00E-15   | 2.32E-13   | -30.07824816 |
| chr7 | 31053909 | 31053909 | + | 0          | 0          | -35.54130224 |
| chr7 | 31053949 | 31053949 | + | 0          | 0          | -37.96368737 |
| chr7 | 31054077 | 31054077 | - | 3.72E-11   | 1.45E-09   | -29.08896659 |
| chr7 | 31054144 | 31054144 | + | 1.10E-12   | 5.04E-11   | -33.82535351 |
| chr7 | 31054145 | 31054145 | - | 0          | 0          | -29.59990523 |
| chr7 | 31067644 | 31067644 | + | 0.00049462 | 0.00492964 | -26.45320197 |
| chr7 | 31083353 | 31083353 | + | 1.30E-06   | 2.61E-05   | -28.94597458 |
| chr7 | 31083392 | 31083392 | + | 6.83E-07   | 1.45E-05   | -29.8533804  |
| chr7 | 31114948 | 31114948 | + | 0          | 0          | -33.71953271 |
| chr7 | 31114949 | 31114949 | - | 0          | 0          | -35.72296315 |
| chr7 | 31115146 | 31115146 | - | 3.23E-10   | 1.13E-08   | -35.92978123 |
| chr7 | 31115148 | 31115148 | + | 4.68E-10   | 1.61E-08   | -26.38300978 |
| chr7 | 31115178 | 31115178 | + | 0          | 0          | -42.48482058 |
| chr7 | 31115217 | 31115217 | + | 0          | 0          | -47.05701623 |
| chr7 | 31115218 | 31115218 | - | 0          | 0          | -50.60084685 |
| chr7 | 31115227 | 31115227 | - | 0          | 0          | -48.49206588 |

|      |          |          |   |            |            |              |
|------|----------|----------|---|------------|------------|--------------|
| chr7 | 31116791 | 31116791 | + | 2.82E-05   | 0.00041691 | 34.21052632  |
| chr7 | 33099185 | 33099185 | - | 0.00013935 | 0.00167963 | 35.75883576  |
| chr7 | 35116968 | 35116968 | + | 0          | 0          | -30.60663707 |
| chr7 | 35416210 | 35416210 | + | 1.48E-07   | 3.54E-06   | -35.24206143 |
| chr7 | 35583748 | 35583748 | + | 0          | 0          | -27.66351236 |
| chr7 | 35583766 | 35583766 | + | 0          | 0          | -25.08971044 |
| chr7 | 35583767 | 35583767 | - | 0          | 0          | -26.1742902  |
| chr7 | 35687419 | 35687419 | + | 0          | 0          | -26.93918928 |
| chr7 | 36604054 | 36604054 | - | 0          | 0          | -34.7885617  |
| chr7 | 37094764 | 37094764 | - | 0.00100197 | 0.00884556 | 25.38593482  |
| chr7 | 37566176 | 37566176 | + | 0.00025121 | 0.00278368 | -37.40740741 |
| chr7 | 37774676 | 37774676 | - | 0          | 0          | -32.48559138 |
| chr7 | 37774715 | 37774715 | + | 0          | 0          | -26.79246329 |
| chr7 | 37774716 | 37774716 | - | 0          | 0          | -28.10243408 |
| chr7 | 37917005 | 37917005 | - | 1.93E-05   | 0.00029803 | -31.42028986 |
| chr7 | 37963334 | 37963334 | - | 0          | 0          | -28.87843453 |
| chr7 | 37963388 | 37963388 | + | 0          | 0          | -38.9561825  |
| chr7 | 37963431 | 37963431 | - | 0          | 0          | -35.29340271 |
| chr7 | 37963440 | 37963440 | - | 0          | 0          | -36.49364609 |
| chr7 | 37963449 | 37963449 | - | 0          | 0          | -39.95913221 |
| chr7 | 38074812 | 38074812 | - | 3.89E-15   | 2.26E-13   | -34.9912094  |
| chr7 | 38174055 | 38174055 | + | 0          | 0          | -29.5076088  |
| chr7 | 38174174 | 38174174 | - | 0          | 0          | -28.32688282 |
| chr7 | 38174198 | 38174198 | + | 0          | 0          | -37.81170543 |
| chr7 | 39696006 | 39696006 | - | 3.67E-06   | 6.73E-05   | -32.45239021 |
| chr7 | 41440572 | 41440572 | - | 0.00027735 | 0.00303012 | -33.3976834  |
| chr7 | 44253561 | 44253561 | - | 1.50E-07   | 3.58E-06   | -28.14600018 |
| chr7 | 44341932 | 44341932 | + | 0.00018267 | 0.00212081 | -25.06265664 |
| chr7 | 44342398 | 44342398 | - | 0.00038339 | 0.00398107 | -28.50962578 |
| chr7 | 44461400 | 44461400 | - | 1.97E-11   | 7.95E-10   | -28.2789705  |
| chr7 | 44525252 | 44525252 | - | 0          | 0          | -26.19616533 |
| chr7 | 44525684 | 44525684 | - | 0          | 0          | -26.81095919 |
| chr7 | 44586516 | 44586516 | + | 4.18E-09   | 1.27E-07   | 25.58032392  |
| chr7 | 44630615 | 44630615 | - | 1.52E-08   | 4.25E-07   | -33.70915785 |
| chr7 | 44665089 | 44665089 | + | 4.73E-08   | 1.23E-06   | -35.52532124 |
| chr7 | 44665096 | 44665096 | - | 1.88E-05   | 0.00029057 | -26.79045093 |
| chr7 | 44669345 | 44669345 | + | 0          | 0          | -28.25471568 |
| chr7 | 44669398 | 44669398 | + | 0          | 0          | -26.11295198 |
| chr7 | 44697071 | 44697071 | + | 2.54E-13   | 1.24E-11   | -26.30480616 |
| chr7 | 44701850 | 44701850 | + | 0          | 0          | -26.69637221 |
| chr7 | 44744864 | 44744864 | + | 0          | 0          | -26.89826963 |

|      |          |          |   |            |            |              |
|------|----------|----------|---|------------|------------|--------------|
| chr7 | 44747888 | 44747888 | + | 0          | 0          | -35.02854177 |
| chr7 | 44747905 | 44747905 | + | 0          | 0          | -25.43733278 |
| chr7 | 44898663 | 44898663 | - | 0          | 0          | -32.62204394 |
| chr7 | 44898673 | 44898673 | - | 1.45E-14   | 8.01E-13   | -27.0791745  |
| chr7 | 44951316 | 44951316 | - | 0          | 0          | -25.82532915 |
| chr7 | 44951601 | 44951601 | - | 0.00015701 | 0.00186194 | -33.98196488 |
| chr7 | 45080549 | 45080549 | - | 7.11E-05   | 0.00093827 | -30.16317016 |
| chr7 | 45083647 | 45083647 | - | 0          | 0          | -25.80679964 |
| chr7 | 45083671 | 45083671 | - | 0          | 0          | -31.49468695 |
| chr7 | 45083688 | 45083688 | - | 0          | 0          | -25.52192588 |
| chr7 | 45083765 | 45083765 | - | 0.00010916 | 0.00135952 | -27.28635682 |
| chr7 | 45083812 | 45083812 | - | 1.81E-06   | 3.53E-05   | -31.75890585 |
| chr7 | 45094041 | 45094041 | - | 8.47E-14   | 4.35E-12   | -26.1899785  |
| chr7 | 45094288 | 45094288 | + | 0          | 0          | -38.60188436 |
| chr7 | 45127071 | 45127071 | + | 8.75E-12   | 3.66E-10   | -25.17800109 |
| chr7 | 45127258 | 45127258 | - | 0          | 0          | -38.47892804 |
| chr7 | 45127272 | 45127272 | - | 4.86E-11   | 1.87E-09   | -27.40106079 |
| chr7 | 45217257 | 45217257 | + | 0          | 0          | -25.92592593 |
| chr7 | 45217258 | 45217258 | - | 0          | 0          | -26.28443457 |
| chr7 | 45235483 | 45235483 | + | 0          | 0          | -41.95337302 |
| chr7 | 45235517 | 45235517 | + | 0          | 0          | -42.66927593 |
| chr7 | 45235533 | 45235533 | + | 0          | 0          | -36.80257084 |
| chr7 | 45235675 | 45235675 | - | 1.36E-06   | 2.72E-05   | -29.66666667 |
| chr7 | 45240734 | 45240734 | + | 0          | 0          | -32.52274636 |
| chr7 | 45240740 | 45240740 | + | 0          | 0          | -25.81867332 |
| chr7 | 45240758 | 45240758 | + | 0          | 0          | -40.66176288 |
| chr7 | 45240760 | 45240760 | + | 0          | 0          | -47.15918827 |
| chr7 | 45240828 | 45240828 | - | 0          | 0          | -41.51176666 |
| chr7 | 45240838 | 45240838 | - | 0          | 0          | -40.93062395 |
| chr7 | 45240882 | 45240882 | + | 0          | 0          | -42.10483845 |
| chr7 | 45240883 | 45240883 | - | 0          | 0          | -39.89504119 |
| chr7 | 45240898 | 45240898 | + | 0          | 0          | -36.24515675 |
| chr7 | 45240899 | 45240899 | - | 0          | 0          | -34.26607458 |
| chr7 | 45240908 | 45240908 | + | 0          | 0          | -39.88508683 |
| chr7 | 45240909 | 45240909 | - | 0          | 0          | -35.91390693 |
| chr7 | 45240930 | 45240930 | + | 0          | 0          | -36.21658788 |
| chr7 | 45240931 | 45240931 | - | 0          | 0          | -29.85405516 |
| chr7 | 45240945 | 45240945 | + | 0          | 0          | -32.85328252 |
| chr7 | 45240946 | 45240946 | - | 0          | 0          | -30.44929954 |
| chr7 | 45240954 | 45240954 | + | 0          | 0          | -36.93468795 |
| chr7 | 45240955 | 45240955 | - | 0          | 0          | -36.89587637 |

|      |          |          |   |          |          |              |
|------|----------|----------|---|----------|----------|--------------|
| chr7 | 45240961 | 45240961 | + | 0        | 0        | -25.98786481 |
| chr7 | 45240962 | 45240962 | - | 0        | 0        | -30.60087596 |
| chr7 | 45240974 | 45240974 | + | 0        | 0        | -28.27158136 |
| chr7 | 45241045 | 45241045 | - | 1.67E-08 | 4.64E-07 | -25.72561286 |
| chr7 | 45241047 | 45241047 | - | 5.30E-10 | 1.81E-08 | -28.21312658 |
| chr7 | 45241062 | 45241062 | - | 4.96E-11 | 1.91E-09 | -29.99707773 |
| chr7 | 45241084 | 45241084 | + | 0        | 0        | -27.42495459 |
| chr7 | 45241085 | 45241085 | - | 0        | 0        | -38.75766318 |
| chr7 | 45241200 | 45241200 | - | 0        | 0        | -31.52848065 |
| chr7 | 45241204 | 45241204 | + | 1.21E-12 | 5.53E-11 | -30.74778761 |
| chr7 | 45241205 | 45241205 | - | 0        | 0        | -28.90483442 |
| chr7 | 45241221 | 45241221 | + | 4.16E-13 | 1.99E-11 | -26.89473684 |
| chr7 | 45420333 | 45420333 | - | 0        | 0        | -32.3667835  |
| chr7 | 45515358 | 45515358 | + | 0        | 0        | -42.63077401 |
| chr7 | 45515502 | 45515502 | + | 0        | 0        | -43.05176896 |
| chr7 | 45515503 | 45515503 | - | 0        | 0        | -44.47606864 |
| chr7 | 45515505 | 45515505 | + | 0        | 0        | -50.0786795  |
| chr7 | 45515514 | 45515514 | + | 0        | 0        | -39.09796191 |
| chr7 | 45515516 | 45515516 | + | 0        | 0        | -42.82055502 |
| chr7 | 45515526 | 45515526 | + | 0        | 0        | -32.77487082 |
| chr7 | 45515527 | 45515527 | - | 0        | 0        | -32.29049608 |
| chr7 | 45515569 | 45515569 | - | 0        | 0        | -47.31082412 |
| chr7 | 45616896 | 45616896 | + | 0        | 0        | -32.89422281 |
| chr7 | 45616906 | 45616906 | + | 0        | 0        | -42.03666175 |
| chr7 | 45617044 | 45617044 | - | 0        | 0        | -32.65075859 |
| chr7 | 45617384 | 45617384 | + | 0        | 0        | -26.33045719 |
| chr7 | 45627542 | 45627542 | - | 0        | 0        | -41.16233512 |
| chr7 | 45627567 | 45627567 | - | 0        | 0        | -30.23911925 |
| chr7 | 45632692 | 45632692 | + | 0        | 0        | -29.64169086 |
| chr7 | 45632704 | 45632704 | + | 0        | 0        | -28.08052552 |
| chr7 | 45644169 | 45644169 | + | 0        | 0        | -34.06323829 |
| chr7 | 45644215 | 45644215 | + | 0        | 0        | -39.71237802 |
| chr7 | 45644251 | 45644251 | - | 0        | 0        | -32.74901566 |
| chr7 | 45644273 | 45644273 | - | 0        | 0        | -38.43198197 |
| chr7 | 45644278 | 45644278 | - | 0        | 0        | -26.33721507 |
| chr7 | 45786201 | 45786201 | + | 1.34E-07 | 3.24E-06 | -42.8544949  |
| chr7 | 45847647 | 45847647 | + | 0        | 0        | -29.52778363 |
| chr7 | 45847716 | 45847716 | - | 2.76E-08 | 7.41E-07 | -31.21027601 |
| chr7 | 45917979 | 45917979 | + | 2.35E-12 | 1.04E-10 | -27.85336357 |
| chr7 | 45929056 | 45929056 | + | 0        | 0        | -31.00378788 |
| chr7 | 45929057 | 45929057 | - | 0        | 0        | -28.54855502 |

|      |          |          |   |            |            |              |
|------|----------|----------|---|------------|------------|--------------|
| chr7 | 45929077 | 45929077 | + | 0          | 0          | -26.31653615 |
| chr7 | 45929218 | 45929218 | - | 0          | 0          | -29.20104017 |
| chr7 | 46030239 | 46030239 | + | 0          | 0          | -33.35609244 |
| chr7 | 46030255 | 46030255 | + | 0          | 0          | -25.13989895 |
| chr7 | 46030268 | 46030268 | + | 5.55E-16   | 3.46E-14   | -25.07109468 |
| chr7 | 46030386 | 46030386 | - | 1.33E-15   | 8.06E-14   | -25.44430425 |
| chr7 | 46138563 | 46138563 | - | 1.51E-07   | 3.60E-06   | -46.76573427 |
| chr7 | 46552322 | 46552322 | + | 0          | 0          | -30.87115724 |
| chr7 | 46552327 | 46552327 | + | 0          | 0          | -32.38547631 |
| chr7 | 46559569 | 46559569 | + | 0.00054968 | 0.0053854  | 43.61851332  |
| chr7 | 46750599 | 46750599 | + | 0          | 0          | -26.46209386 |
| chr7 | 48897621 | 48897621 | + | 0          | 0          | -38.10799292 |
| chr7 | 48897674 | 48897674 | - | 0          | 0          | -34.46686976 |
| chr7 | 49303559 | 49303559 | - | 0          | 0          | -41.30899588 |
| chr7 | 49303577 | 49303577 | - | 0          | 0          | -39.03550236 |
| chr7 | 49348407 | 49348407 | - | 2.22E-09   | 6.98E-08   | -26.84638264 |
| chr7 | 49348436 | 49348436 | + | 1.17E-13   | 5.92E-12   | -26.09950094 |
| chr7 | 49348437 | 49348437 | - | 9.68E-11   | 3.61E-09   | -29.92752712 |
| chr7 | 49437877 | 49437877 | + | 0.00049265 | 0.0049135  | -26.82044324 |
| chr7 | 49504427 | 49504427 | + | 1.07E-13   | 5.43E-12   | -25.7913961  |
| chr7 | 49640102 | 49640102 | + | 5.70E-05   | 0.00077345 | -31.07088989 |
| chr7 | 49640359 | 49640359 | - | 3.56E-07   | 7.96E-06   | -31.64853165 |
| chr7 | 49696595 | 49696595 | - | 1.01E-05   | 0.00016632 | -36.4638448  |
| chr7 | 49786821 | 49786821 | - | 0.00028979 | 0.00314406 | -25.2892337  |
| chr7 | 50451627 | 50451627 | - | 8.62E-07   | 1.79E-05   | -34.88210818 |
| chr7 | 52835876 | 52835876 | + | 0.00064208 | 0.0061283  | -33.53174603 |
| chr7 | 56294310 | 56294310 | + | 6.43E-06   | 0.00011132 | 25.53418803  |
| chr7 | 63940172 | 63940172 | - | 7.46E-08   | 1.87E-06   | -27.93394988 |
| chr7 | 64502889 | 64502889 | + | 2.75E-05   | 0.00040758 | -34.28571429 |
| chr7 | 65470126 | 65470126 | - | 1.30E-08   | 3.67E-07   | -27.49987291 |
| chr7 | 65577398 | 65577398 | - | 1.54E-06   | 3.06E-05   | -36.22828784 |
| chr7 | 65820043 | 65820043 | + | 4.76E-05   | 0.00066132 | -26.33016969 |
| chr7 | 66247427 | 66247427 | + | 1.28E-13   | 6.44E-12   | -37.7076553  |
| chr7 | 66248079 | 66248079 | - | 0.00015022 | 0.00179219 | -27.15454983 |
| chr7 | 67421900 | 67421900 | + | 0          | 0          | -36.65295731 |
| chr7 | 67443449 | 67443449 | + | 0          | 0          | -34.35013263 |
| chr7 | 67443471 | 67443471 | + | 0          | 0          | -32.77010708 |
| chr7 | 67443495 | 67443495 | - | 0          | 0          | -38.59061487 |
| chr7 | 67451725 | 67451725 | - | 0          | 0          | -29.26535415 |
| chr7 | 67451755 | 67451755 | - | 0          | 0          | -27.92587555 |
| chr7 | 67564434 | 67564434 | + | 3.67E-05   | 0.00052568 | -27.24505327 |



|      |          |          |   |            |            |              |
|------|----------|----------|---|------------|------------|--------------|
| chr7 | 67710352 | 67710352 | + | 0          | 0          | -25.15602237 |
| chr7 | 67710394 | 67710394 | + | 0          | 0          | -25.25503946 |
| chr7 | 67710537 | 67710537 | - | 0          | 0          | -25.5452729  |
| chr7 | 67961411 | 67961411 | - | 7.08E-05   | 0.00093497 | -27.82407407 |
| chr7 | 67964952 | 67964952 | - | 0          | 0          | -27.53865907 |
| chr7 | 67970892 | 67970892 | + | 8.44E-09   | 2.45E-07   | -46.90958165 |
| chr7 | 67970900 | 67970900 | + | 1.39E-05   | 0.00022191 | -38.3265857  |
| chr7 | 68004394 | 68004394 | + | 3.32E-06   | 6.14E-05   | -29.23985463 |
| chr7 | 68264124 | 68264124 | - | 3.39E-06   | 6.25E-05   | -27.85031847 |
| chr7 | 68264144 | 68264144 | + | 0          | 0          | -25.54396167 |
| chr7 | 68264161 | 68264161 | + | 0          | 0          | -27.74868106 |
| chr7 | 68264162 | 68264162 | - | 0          | 0          | -25.28696357 |
| chr7 | 68264170 | 68264170 | - | 0          | 0          | -27.16652136 |
| chr7 | 70361617 | 70361617 | + | 7.70E-05   | 0.00100558 | 32           |
| chr7 | 71351513 | 71351513 | - | 1.72E-12   | 7.76E-11   | -28.2367909  |
| chr7 | 71351524 | 71351524 | - | 6.66E-16   | 4.13E-14   | -32.56264981 |
| chr7 | 71380672 | 71380672 | + | 3.15E-10   | 1.11E-08   | -25.31380753 |
| chr7 | 71383670 | 71383670 | + | 5.23E-07   | 1.13E-05   | -25.3883211  |
| chr7 | 73624854 | 73624854 | + | 0.00029929 | 0.00323099 | -35.1255887  |
| chr7 | 75309148 | 75309148 | - | 0          | 0          | -29.61751089 |
| chr7 | 75611839 | 75611839 | + | 0          | 0          | -29.14303192 |
| chr7 | 78672246 | 78672246 | - | 0.0003149  | 0.00337326 | -26.25       |
| chr7 | 79397472 | 79397472 | + | 0          | 0          | -28.70147223 |
| chr7 | 79464870 | 79464870 | - | 0          | 0          | -34.71321118 |
| chr7 | 79464877 | 79464877 | + | 0          | 0          | -42.73573728 |
| chr7 | 79464878 | 79464878 | - | 0          | 0          | -39.26053725 |
| chr7 | 79464896 | 79464896 | + | 0          | 0          | -48.34520469 |
| chr7 | 79464897 | 79464897 | - | 0          | 0          | -46.47453938 |
| chr7 | 79464916 | 79464916 | - | 0          | 0          | -27.29724982 |
| chr7 | 79515744 | 79515744 | + | 3.45E-08   | 9.14E-07   | -28.30169078 |
| chr7 | 79515751 | 79515751 | + | 3.25E-10   | 1.14E-08   | -31.78640186 |
| chr7 | 79515752 | 79515752 | - | 1.20E-12   | 5.50E-11   | -33.51340809 |
| chr7 | 79515788 | 79515788 | - | 0          | 0          | -28.31784807 |
| chr7 | 79515804 | 79515804 | + | 0          | 0          | -36.23634688 |
| chr7 | 79515805 | 79515805 | - | 0          | 0          | -29.22277722 |
| chr7 | 79526079 | 79526079 | + | 0          | 0          | -30.80276747 |
| chr7 | 79549941 | 79549941 | - | 0.00021196 | 0.00240834 | -37.5        |
| chr7 | 79578286 | 79578286 | - | 3.27E-09   | 1.01E-07   | -30.92866892 |
| chr7 | 79578295 | 79578295 | - | 6.27E-08   | 1.59E-06   | -30.81745109 |
| chr7 | 79578466 | 79578466 | + | 1.35E-07   | 3.25E-06   | -27.4204848  |
| chr7 | 79593455 | 79593455 | - | 3.29E-06   | 6.08E-05   | -32.32998885 |

|      |          |          |   |            |            |              |
|------|----------|----------|---|------------|------------|--------------|
| chr7 | 79710721 | 79710721 | + | 0          | 0          | -30.09510282 |
| chr7 | 79793589 | 79793589 | - | 1.33E-15   | 8.06E-14   | -33.7164751  |
| chr7 | 79793624 | 79793624 | - | 4.36E-09   | 1.32E-07   | -25.89776088 |
| chr7 | 79818480 | 79818480 | - | 6.94E-12   | 2.93E-10   | -26.3908008  |
| chr7 | 79820387 | 79820387 | + | 0          | 0          | -35.10957936 |
| chr7 | 79820397 | 79820397 | + | 0          | 0          | -26.76645389 |
| chr7 | 79820424 | 79820424 | + | 0          | 0          | -37.48849406 |
| chr7 | 79820425 | 79820425 | - | 0          | 0          | -43.84298611 |
| chr7 | 79820444 | 79820444 | - | 0          | 0          | -25.28111603 |
| chr7 | 79820465 | 79820465 | - | 0          | 0          | -33.36336175 |
| chr7 | 79858540 | 79858540 | - | 0          | 0          | -27.66103359 |
| chr7 | 80015574 | 80015574 | - | 1.24E-08   | 3.52E-07   | -26.94688824 |
| chr7 | 80049002 | 80049002 | - | 6.69E-08   | 1.69E-06   | -33.84480786 |
| chr7 | 80057848 | 80057848 | - | 0          | 0          | -27.04300894 |
| chr7 | 80057893 | 80057893 | + | 8.54E-10   | 2.84E-08   | -25.3743389  |
| chr7 | 80068603 | 80068603 | + | 0          | 0          | -27.89266659 |
| chr7 | 80295546 | 80295546 | - | 2.43E-05   | 0.00036525 | -31.69129721 |
| chr7 | 80390937 | 80390937 | + | 0          | 0          | -26.21722846 |
| chr7 | 80390938 | 80390938 | - | 0          | 0          | -25.98313165 |
| chr7 | 80390949 | 80390949 | + | 0          | 0          | -25.37451244 |
| chr7 | 80390950 | 80390950 | - | 0          | 0          | -27.71504332 |
| chr7 | 80438969 | 80438969 | + | 4.56E-05   | 0.00063694 | -34.2780027  |
| chr7 | 80438977 | 80438977 | + | 1.03E-05   | 0.00016974 | -47.77327935 |
| chr7 | 80438997 | 80438997 | + | 1.67E-05   | 0.00026233 | -48.04318489 |
| chr7 | 80555724 | 80555724 | + | 4.58E-08   | 1.19E-06   | -26.9840021  |
| chr7 | 80587522 | 80587522 | + | 0.00020167 | 0.00230791 | -27.59864975 |
| chr7 | 80587533 | 80587533 | + | 3.22E-06   | 5.97E-05   | -34.15201956 |
| chr7 | 80651955 | 80651955 | + | 1.59E-07   | 3.77E-06   | -25.92866188 |
| chr7 | 80820048 | 80820048 | - | 3.88E-05   | 0.00055215 | -40.45416316 |
| chr7 | 80845941 | 80845941 | - | 0          | 0          | -39.48041169 |
| chr7 | 80846238 | 80846238 | + | 1.67E-15   | 9.99E-14   | -29.89848789 |
| chr7 | 80846239 | 80846239 | - | 0          | 0          | -30.58153046 |
| chr7 | 80876084 | 80876084 | - | 0          | 0          | -30.48785347 |
| chr7 | 80876111 | 80876111 | - | 8.57E-07   | 1.79E-05   | -34.81481481 |
| chr7 | 80876154 | 80876154 | - | 2.35E-07   | 5.43E-06   | -39.00775194 |
| chr7 | 80876299 | 80876299 | - | 0          | 0          | -26.81130595 |
| chr7 | 81057501 | 81057501 | + | 0          | 0          | -54.94817456 |
| chr7 | 81057528 | 81057528 | + | 0          | 0          | -43.14531549 |
| chr7 | 81057529 | 81057529 | - | 0          | 0          | -50.43673012 |
| chr7 | 81057562 | 81057562 | - | 0          | 0          | -25.44556419 |
| chr7 | 81057578 | 81057578 | + | 0          | 0          | -51.93365609 |

|      |          |          |   |   |   |              |
|------|----------|----------|---|---|---|--------------|
| chr7 | 81057579 | 81057579 | - | 0 | 0 | -50.46890354 |
| chr7 | 81057580 | 81057580 | + | 0 | 0 | -56.41260419 |
| chr7 | 81057581 | 81057581 | - | 0 | 0 | -54.73326569 |
| chr7 | 81057582 | 81057582 | + | 0 | 0 | -64.16057021 |
| chr7 | 81057583 | 81057583 | - | 0 | 0 | -52.28493262 |
| chr7 | 81057591 | 81057591 | + | 0 | 0 | -51.59413631 |
| chr7 | 81057592 | 81057592 | - | 0 | 0 | -44.8914017  |
| chr7 | 81057602 | 81057602 | + | 0 | 0 | -60.64312736 |
| chr7 | 81057603 | 81057603 | - | 0 | 0 | -55.73337249 |
| chr7 | 81057623 | 81057623 | + | 0 | 0 | -57.4655898  |
| chr7 | 81057624 | 81057624 | - | 0 | 0 | -50.16290903 |
| chr7 | 81057637 | 81057637 | + | 0 | 0 | -58.95672731 |
| chr7 | 81057638 | 81057638 | - | 0 | 0 | -59.10755967 |
| chr7 | 81057639 | 81057639 | + | 0 | 0 | -36.05314594 |
| chr7 | 81057640 | 81057640 | - | 0 | 0 | -34.35764175 |
| chr7 | 81057647 | 81057647 | + | 0 | 0 | -61.55315615 |
| chr7 | 81057648 | 81057648 | - | 0 | 0 | -60.70910672 |
| chr7 | 81057649 | 81057649 | + | 0 | 0 | -56.44676057 |
| chr7 | 81057650 | 81057650 | - | 0 | 0 | -55.34016545 |
| chr7 | 81057654 | 81057654 | + | 0 | 0 | -54.71568963 |
| chr7 | 81057655 | 81057655 | - | 0 | 0 | -59.27348014 |
| chr7 | 81057675 | 81057675 | + | 0 | 0 | -56.77400128 |
| chr7 | 81057676 | 81057676 | - | 0 | 0 | -56.32755676 |
| chr7 | 81057698 | 81057698 | + | 0 | 0 | -32.85436645 |
| chr7 | 81057699 | 81057699 | - | 0 | 0 | -29.70782153 |
| chr7 | 81057704 | 81057704 | + | 0 | 0 | -50.54599075 |
| chr7 | 81057705 | 81057705 | - | 0 | 0 | -48.68406118 |
| chr7 | 81057708 | 81057708 | - | 0 | 0 | -48.04448426 |
| chr7 | 81057713 | 81057713 | - | 0 | 0 | -47.61933824 |
| chr7 | 81057725 | 81057725 | + | 0 | 0 | -51.63911033 |
| chr7 | 81057738 | 81057738 | + | 0 | 0 | -56.45852539 |
| chr7 | 81057755 | 81057755 | + | 0 | 0 | -49.40911561 |
| chr7 | 81057759 | 81057759 | + | 0 | 0 | -33.19047875 |
| chr7 | 81057780 | 81057780 | - | 0 | 0 | -41.09246288 |
| chr7 | 81057829 | 81057829 | + | 0 | 0 | -37.35703704 |
| chr7 | 81057830 | 81057830 | - | 0 | 0 | -39.34239697 |
| chr7 | 81057884 | 81057884 | - | 0 | 0 | -42.02905555 |
| chr7 | 81058912 | 81058912 | - | 0 | 0 | -28.46209526 |
| chr7 | 81058926 | 81058926 | + | 0 | 0 | -34.14049509 |
| chr7 | 81058927 | 81058927 | - | 0 | 0 | -31.90705979 |
| chr7 | 81058951 | 81058951 | - | 0 | 0 | -33.78378378 |

|      |          |          |   |            |            |              |
|------|----------|----------|---|------------|------------|--------------|
| chr7 | 81614440 | 81614440 | + | 0.00033507 | 0.00355483 | -27.97744891 |
| chr7 | 81858545 | 81858545 | - | 0          | 0          | -29.88240845 |
| chr7 | 81858581 | 81858581 | - | 0          | 0          | -28.89750926 |
| chr7 | 82012703 | 82012703 | - | 0          | 0          | -27.94879625 |
| chr7 | 82012705 | 82012705 | + | 0          | 0          | -27.58657979 |
| chr7 | 82012706 | 82012706 | - | 0          | 0          | -28.11923432 |
| chr7 | 82012709 | 82012709 | + | 0          | 0          | -33.61866973 |
| chr7 | 82012710 | 82012710 | - | 0          | 0          | -30.94339623 |
| chr7 | 82012742 | 82012742 | - | 1.27E-14   | 7.01E-13   | -25.85435507 |
| chr7 | 82082981 | 82082981 | + | 4.29E-14   | 2.26E-12   | -28.72041096 |
| chr7 | 82120034 | 82120034 | - | 2.35E-07   | 5.42E-06   | -25.4344976  |
| chr7 | 82174401 | 82174401 | + | 0          | 0          | -25.14044156 |
| chr7 | 82842257 | 82842257 | + | 1.11E-16   | 7.26E-15   | -25.9864744  |
| chr7 | 82868956 | 82868956 | - | 0.0005937  | 0.00574171 | -26.76767677 |
| chr7 | 82868972 | 82868972 | + | 8.39E-05   | 0.00108231 | -25.60846561 |
| chr7 | 82869007 | 82869007 | + | 1.21E-05   | 0.00019583 | -26.97642164 |
| chr7 | 82869139 | 82869139 | - | 1.27E-11   | 5.24E-10   | -32.50983478 |
| chr7 | 82869148 | 82869148 | - | 6.73E-08   | 1.70E-06   | -26.28899682 |
| chr7 | 82869177 | 82869177 | - | 3.42E-08   | 9.06E-07   | -25.52712055 |
| chr7 | 82869198 | 82869198 | + | 0          | 0          | -26.63600177 |
| chr7 | 82869210 | 82869210 | + | 0          | 0          | -29.20536636 |
| chr7 | 82869216 | 82869216 | + | 0          | 0          | -34.60181392 |
| chr7 | 82869241 | 82869241 | - | 0          | 0          | -34.7568552  |
| chr7 | 82869262 | 82869262 | - | 0          | 0          | -31.03324486 |
| chr7 | 82869268 | 82869268 | - | 0          | 0          | -33.46785989 |
| chr7 | 82869732 | 82869732 | + | 0          | 0          | -30.30721613 |
| chr7 | 82869788 | 82869788 | - | 0          | 0          | -26.94907508 |
| chr7 | 82869791 | 82869791 | - | 0          | 0          | -30.44574425 |
| chr7 | 82869800 | 82869800 | + | 0          | 0          | -30.79535601 |
| chr7 | 82869815 | 82869815 | + | 0          | 0          | -31.61720782 |
| chr7 | 82869817 | 82869817 | + | 0          | 0          | -28.05887609 |
| chr7 | 82869827 | 82869827 | + | 0          | 0          | -25.59015624 |
| chr7 | 82869845 | 82869845 | + | 0          | 0          | -31.15521451 |
| chr7 | 82869846 | 82869846 | - | 0          | 0          | -36.24554542 |
| chr7 | 82869852 | 82869852 | - | 0          | 0          | -27.60608555 |
| chr7 | 82869872 | 82869872 | - | 0          | 0          | -25.51680414 |
| chr7 | 82869875 | 82869875 | - | 0          | 0          | -25.91863517 |
| chr7 | 82869877 | 82869877 | - | 0          | 0          | -30.34967988 |
| chr7 | 82869881 | 82869881 | - | 0          | 0          | -26.65262248 |
| chr7 | 82869886 | 82869886 | - | 0          | 0          | -25.75264148 |
| chr7 | 82869891 | 82869891 | - | 0          | 0          | -31.0743532  |

|      |          |          |   |            |            |              |
|------|----------|----------|---|------------|------------|--------------|
| chr7 | 83745911 | 83745911 | - | 0.00016977 | 0.0019912  | -40.61784897 |
| chr7 | 83882937 | 83882937 | - | 0          | 0          | -32.94444232 |
| chr7 | 83882969 | 83882969 | - | 1.67E-15   | 9.99E-14   | -30.60011884 |
| chr7 | 83882971 | 83882971 | - | 7.00E-13   | 3.28E-11   | -27.97474271 |
| chr7 | 83882973 | 83882973 | - | 0          | 0          | -40.13019391 |
| chr7 | 83882987 | 83882987 | - | 7.77E-16   | 4.79E-14   | -26.42975207 |
| chr7 | 83883006 | 83883006 | + | 0          | 0          | -31.91026764 |
| chr7 | 83883007 | 83883007 | - | 0          | 0          | -32.71519571 |
| chr7 | 83883026 | 83883026 | + | 0          | 0          | -28.2056611  |
| chr7 | 83883027 | 83883027 | - | 0          | 0          | -28.74582015 |
| chr7 | 89677563 | 89677563 | + | 0          | 0          | -33.09480606 |
| chr7 | 89677564 | 89677564 | - | 0          | 0          | -29.42642618 |
| chr7 | 89677596 | 89677596 | - | 0          | 0          | -30.52702214 |
| chr7 | 89903672 | 89903672 | - | 0.00101839 | 0.00896407 | -43.86206897 |
| chr7 | 92393167 | 92393167 | - | 0          | 0          | -25.30656863 |
| chr7 | 92393196 | 92393196 | - | 0          | 0          | -30.94091679 |
| chr7 | 96204802 | 96204802 | + | 6.30E-05   | 0.00084424 | -28.43137255 |
| chr7 | 96754508 | 96754508 | - | 3.08E-08   | 8.22E-07   | -31.35186961 |
| chr7 | 96817186 | 96817186 | + | 7.58E-11   | 2.86E-09   | -32.57696553 |
| chr7 | 97329528 | 97329528 | - | 4.61E-10   | 1.58E-08   | -31.53439153 |
| chr7 | 98087969 | 98087969 | - | 0.00101644 | 0.00894972 | -26.92307692 |
| chr7 | 98109275 | 98109275 | - | 1.95E-08   | 5.37E-07   | -31.25531714 |
| chr7 | 98111350 | 98111350 | + | 0          | 0          | -25.06383499 |
| chr7 | 98341994 | 98341994 | - | 6.42E-11   | 2.44E-09   | -31.28632145 |
| chr7 | 98354582 | 98354582 | + | 0          | 0          | -32.90246599 |
| chr7 | 98354708 | 98354708 | - | 0          | 0          | -40.19291332 |
| chr7 | 98354721 | 98354721 | - | 0          | 0          | -33.66512108 |
| chr7 | 98483060 | 98483060 | + | 0          | 0          | -27.04429504 |
| chr7 | 98483555 | 98483555 | + | 0          | 0          | -25.40558153 |
| chr7 | 98486562 | 98486562 | - | 0          | 0          | -26.18370818 |
| chr7 | 98499938 | 98499938 | - | 1.84E-07   | 4.34E-06   | -26.33406799 |
| chr7 | 98572346 | 98572346 | + | 0.0001503  | 0.00179293 | -26.8442623  |
| chr7 | 98572540 | 98572540 | - | 1.82E-11   | 7.37E-10   | -38.30227743 |
| chr7 | 98572542 | 98572542 | - | 1.09E-14   | 6.06E-13   | -40.21428571 |
| chr7 | 98572590 | 98572590 | - | 2.85E-11   | 1.13E-09   | -34.35734463 |
| chr7 | 98573571 | 98573571 | - | 0          | 0          | -28.12099154 |
| chr7 | 98692956 | 98692956 | - | 0          | 0          | -40.39501591 |
| chr7 | 98839896 | 98839896 | + | 0          | 0          | -26.01727289 |
| chr7 | 98857165 | 98857165 | - | 3.01E-08   | 8.04E-07   | -28.5326004  |
| chr7 | 98870933 | 98870933 | + | 0          | 0          | -38.79150217 |
| chr7 | 98871005 | 98871005 | - | 0          | 0          | -32.42119727 |

|      |           |           |   |            |            |              |
|------|-----------|-----------|---|------------|------------|--------------|
| chr7 | 98871035  | 98871035  | - | 0          | 0          | -31.96877497 |
| chr7 | 98892585  | 98892585  | + | 0          | 0          | -36.88147217 |
| chr7 | 99061980  | 99061980  | + | 0          | 0          | -32.43094902 |
| chr7 | 99062005  | 99062005  | + | 0          | 0          | -33.87406245 |
| chr7 | 99062006  | 99062006  | - | 0          | 0          | -26.86955313 |
| chr7 | 99062022  | 99062022  | - | 0          | 0          | -27.48760201 |
| chr7 | 99074130  | 99074130  | + | 0          | 0          | -28.62999115 |
| chr7 | 99074176  | 99074176  | + | 0          | 0          | -28.05795112 |
| chr7 | 99155831  | 99155831  | - | 1.68E-07   | 3.99E-06   | -30.67692308 |
| chr7 | 99156114  | 99156114  | + | 0          | 0          | -26.91651233 |
| chr7 | 99156115  | 99156115  | - | 1.43E-09   | 4.62E-08   | -48.34054834 |
| chr7 | 99156136  | 99156136  | + | 0          | 0          | -40.73377309 |
| chr7 | 99156137  | 99156137  | - | 0          | 0          | -32.666098   |
| chr7 | 99329094  | 99329094  | + | 6.73E-11   | 2.55E-09   | -47.76119403 |
| chr7 | 99351625  | 99351625  | - | 0          | 0          | -32.25957049 |
| chr7 | 99351927  | 99351927  | + | 1.80E-11   | 7.28E-10   | -30.27102006 |
| chr7 | 99351931  | 99351931  | + | 3.57E-10   | 1.24E-08   | -32.74410774 |
| chr7 | 99351932  | 99351932  | - | 4.50E-12   | 1.94E-10   | -40.97792374 |
| chr7 | 99351955  | 99351955  | + | 0          | 0          | -34.03072743 |
| chr7 | 99351956  | 99351956  | - | 1.90E-08   | 5.24E-07   | -35.78673924 |
| chr7 | 99352020  | 99352020  | - | 0          | 0          | -30.31769769 |
| chr7 | 99352046  | 99352046  | - | 0          | 0          | -33.33046962 |
| chr7 | 99355674  | 99355674  | - | 5.47E-08   | 1.40E-06   | -30.51807601 |
| chr7 | 99355715  | 99355715  | + | 0.00038812 | 0.00402176 | -31.77419355 |
| chr7 | 99387658  | 99387658  | + | 2.14E-08   | 5.86E-07   | -30.21477976 |
| chr7 | 99387659  | 99387659  | - | 5.47E-13   | 2.59E-11   | -31.87930393 |
| chr7 | 99387827  | 99387827  | - | 0          | 0          | -32.5248132  |
| chr7 | 99458531  | 99458531  | - | 2.55E-15   | 1.51E-13   | -39.31623932 |
| chr7 | 99510327  | 99510327  | - | 0          | 0          | -29.08047398 |
| chr7 | 99548217  | 99548217  | + | 0          | 0          | -26.90691158 |
| chr7 | 99548368  | 99548368  | - | 5.82E-13   | 2.75E-11   | -42.24242424 |
| chr7 | 99563460  | 99563460  | + | 5.56E-14   | 2.90E-12   | -27.57938358 |
| chr7 | 100042295 | 100042295 | + | 8.41E-13   | 3.91E-11   | -28.79238393 |
| chr7 | 100658364 | 100658364 | + | 0          | 0          | -25.41324222 |
| chr7 | 100658423 | 100658423 | - | 0          | 0          | -25.66269411 |
| chr7 | 100679067 | 100679067 | + | 5.16E-05   | 0.00070857 | -40          |
| chr7 | 100894230 | 100894230 | + | 0          | 0          | -25.38519906 |
| chr7 | 100916881 | 100916881 | - | 0          | 0          | -27.70542215 |
| chr7 | 100927715 | 100927715 | + | 0          | 0          | -30.01293347 |
| chr7 | 100927876 | 100927876 | - | 7.77E-16   | 4.79E-14   | -25.36426012 |
| chr7 | 100930880 | 100930880 | + | 1.84E-05   | 0.00028535 | -26.0002306  |

|      |           |           |   |          |            |              |
|------|-----------|-----------|---|----------|------------|--------------|
| chr7 | 100943953 | 100943953 | + | 0        | 0          | -26.84273076 |
| chr7 | 100961420 | 100961420 | - | 0        | 0          | -26.89121105 |
| chr7 | 100964059 | 100964059 | + | 0        | 0          | -36.40831985 |
| chr7 | 100964163 | 100964163 | + | 1.47E-05 | 0.00023396 | -35.19736842 |
| chr7 | 100964164 | 100964164 | - | 3.46E-12 | 1.51E-10   | -28.52041261 |
| chr7 | 100974077 | 100974077 | + | 8.01E-09 | 2.33E-07   | -30.92899914 |
| chr7 | 101003708 | 101003708 | - | 5.82E-12 | 2.48E-10   | -36.78015398 |
| chr7 | 101003746 | 101003746 | - | 4.10E-14 | 2.16E-12   | -37.97269542 |
| chr7 | 101061345 | 101061345 | + | 6.36E-07 | 1.36E-05   | -34.98470948 |
| chr7 | 101061357 | 101061357 | + | 7.54E-05 | 0.000987   | -28.30188679 |
| chr7 | 101061373 | 101061373 | + | 3.30E-05 | 0.00047852 | -29.58401408 |
| chr7 | 101061381 | 101061381 | + | 0.000234 | 0.00262014 | -26.61085743 |
| chr7 | 101061391 | 101061391 | + | 6.40E-05 | 0.00085578 | -26.41699133 |
| chr7 | 101063576 | 101063576 | + | 3.33E-16 | 2.11E-14   | -27.97791964 |
| chr7 | 101354381 | 101354381 | - | 6.85E-10 | 2.30E-08   | -42.24089636 |
| chr7 | 101354410 | 101354410 | + | 0        | 0          | -29.69485808 |
| chr7 | 101354411 | 101354411 | - | 3.83E-09 | 1.17E-07   | -39.28571429 |
| chr7 | 101461936 | 101461936 | + | 1.67E-15 | 9.99E-14   | -34.19240606 |
| chr7 | 101461940 | 101461940 | + | 0        | 0          | -36.18349715 |
| chr7 | 101461956 | 101461956 | + | 1.11E-16 | 7.26E-15   | -31.03291476 |
| chr7 | 101461960 | 101461960 | + | 0        | 0          | -38.96986166 |
| chr7 | 101462075 | 101462075 | - | 0        | 0          | -46.52534554 |
| chr7 | 101465593 | 101465593 | + | 0        | 0          | -41.58893331 |
| chr7 | 101465594 | 101465594 | - | 0        | 0          | -47.19220775 |
| chr7 | 101465599 | 101465599 | + | 0        | 0          | -39.66611505 |
| chr7 | 101465600 | 101465600 | - | 0        | 0          | -41.55141779 |
| chr7 | 101465635 | 101465635 | - | 0        | 0          | -34.16136881 |
| chr7 | 101624612 | 101624612 | + | 1.14E-13 | 5.79E-12   | -27.06140351 |
| chr7 | 101838720 | 101838720 | + | 3.50E-09 | 1.07E-07   | -31.66320975 |
| chr7 | 102102845 | 102102845 | + | 3.97E-06 | 7.21E-05   | -40.95238095 |
| chr7 | 102106941 | 102106941 | + | 3.83E-10 | 1.33E-08   | -27.08186226 |
| chr7 | 102106957 | 102106957 | + | 5.77E-15 | 3.30E-13   | -35.12043512 |
| chr7 | 105685777 | 105685777 | - | 0        | 0          | -25.15961004 |
| chr7 | 105685786 | 105685786 | - | 0        | 0          | -25.67777981 |
| chr7 | 105762144 | 105762144 | - | 2.08E-06 | 4.02E-05   | -27.80973558 |
| chr7 | 105777804 | 105777804 | + | 0        | 0          | -26.55295833 |
| chr7 | 105777851 | 105777851 | + | 5.55E-16 | 3.46E-14   | -26.06516291 |
| chr7 | 105787215 | 105787215 | + | 0        | 0          | -28.9452176  |
| chr7 | 105787216 | 105787216 | - | 0        | 0          | -28.53507822 |
| chr7 | 109241821 | 109241821 | - | 1.41E-05 | 0.00022512 | -27.89096126 |
| chr7 | 109493801 | 109493801 | - | 1.44E-14 | 7.95E-13   | -35.81187843 |

|      |           |           |   |          |          |              |
|------|-----------|-----------|---|----------|----------|--------------|
| chr7 | 109493823 | 109493823 | + | 0        | 0        | -28.15517968 |
| chr7 | 109493824 | 109493824 | - | 1.96E-09 | 6.21E-08 | -28.03267372 |
| chr7 | 109493869 | 109493869 | + | 0        | 0        | -32.34072513 |
| chr7 | 109507449 | 109507449 | - | 0        | 0        | -27.6002456  |
| chr7 | 110003159 | 110003159 | + | 0        | 0        | -26.1134151  |
| chr7 | 110003200 | 110003200 | + | 0        | 0        | -28.76663674 |
| chr7 | 110003201 | 110003201 | - | 0        | 0        | -30.6665617  |
| chr7 | 110003213 | 110003213 | + | 0        | 0        | -25.10387253 |
| chr7 | 110003214 | 110003214 | - | 0        | 0        | -28.42380574 |
| chr7 | 110003238 | 110003238 | - | 5.00E-15 | 2.88E-13 | -25.54985977 |
| chr7 | 110003249 | 110003249 | + | 0        | 0        | -33.87604167 |
| chr7 | 110003250 | 110003250 | - | 0        | 0        | -27.88719185 |
| chr7 | 110003266 | 110003266 | + | 0        | 0        | -34.68234981 |
| chr7 | 110003271 | 110003271 | + | 0        | 0        | -29.00688377 |
| chr7 | 110003276 | 110003276 | + | 0        | 0        | -32.40312156 |
| chr7 | 110003288 | 110003288 | + | 0        | 0        | -31.2379868  |
| chr7 | 110003294 | 110003294 | + | 0        | 0        | -32.18033031 |
| chr7 | 110003295 | 110003295 | - | 0        | 0        | -37.7207957  |
| chr7 | 110003306 | 110003306 | - | 0        | 0        | -32.23004188 |
| chr7 | 110003340 | 110003340 | - | 0        | 0        | -28.26688395 |
| chr7 | 110297189 | 110297189 | + | 0        | 0        | -31.21467589 |
| chr7 | 110297190 | 110297190 | - | 9.42E-08 | 2.33E-06 | -26.54320988 |
| chr7 | 110297216 | 110297216 | + | 0        | 0        | -41.35305878 |
| chr7 | 110297336 | 110297336 | - | 0        | 0        | -39.16031004 |
| chr7 | 110297356 | 110297356 | + | 0        | 0        | -33.89406497 |
| chr7 | 110297397 | 110297397 | - | 1.11E-16 | 7.26E-15 | -26.11616931 |
| chr7 | 110297399 | 110297399 | + | 0        | 0        | -32.39873052 |
| chr7 | 110297416 | 110297416 | + | 0        | 0        | -38.20036071 |
| chr7 | 110768017 | 110768017 | + | 0        | 0        | -30.65613537 |
| chr7 | 110768020 | 110768020 | + | 0        | 0        | -25.98664393 |
| chr7 | 110768155 | 110768155 | + | 5.68E-10 | 1.93E-08 | -32.0910578  |
| chr7 | 111016829 | 111016829 | + | 6.28E-07 | 1.34E-05 | -29.11507098 |
| chr7 | 111016867 | 111016867 | + | 3.57E-08 | 9.45E-07 | -42.74891775 |
| chr7 | 112158016 | 112158016 | + | 9.77E-15 | 5.47E-13 | -26.70609528 |
| chr7 | 112159103 | 112159103 | - | 0        | 0        | -31.96884205 |
| chr7 | 112226653 | 112226653 | - | 1.11E-16 | 7.26E-15 | -26.31024228 |
| chr7 | 112502294 | 112502294 | + | 0        | 0        | -27.40023119 |
| chr7 | 112985482 | 112985482 | - | 0        | 0        | -31.72700362 |
| chr7 | 113066635 | 113066635 | - | 0        | 0        | -27.05626236 |
| chr7 | 114004428 | 114004428 | + | 6.65E-14 | 3.45E-12 | -25.03913043 |
| chr7 | 115233747 | 115233747 | + | 0        | 0        | -40.75963252 |



|      |           |           |   |            |            |              |
|------|-----------|-----------|---|------------|------------|--------------|
| chr7 | 115233913 | 115233913 | - | 2.05E-10   | 7.35E-09   | -25.10487916 |
| chr7 | 115450752 | 115450752 | - | 0          | 0          | -28.21186743 |
| chr7 | 115453587 | 115453587 | + | 0          | 0          | -26.9602627  |
| chr7 | 115453594 | 115453594 | + | 0          | 0          | -29.93473567 |
| chr7 | 115453619 | 115453619 | + | 0          | 0          | -26.45400812 |
| chr7 | 115453627 | 115453627 | - | 0          | 0          | -26.14026182 |
| chr7 | 115453653 | 115453653 | - | 0          | 0          | -26.25646941 |
| chr7 | 115893959 | 115893959 | + | 0          | 0          | -37.45577701 |
| chr7 | 115893960 | 115893960 | - | 0          | 0          | -32.39322112 |
| chr7 | 115893967 | 115893967 | + | 0          | 0          | -37.45726704 |
| chr7 | 115893968 | 115893968 | - | 0          | 0          | -33.13365957 |
| chr7 | 115893983 | 115893983 | - | 0          | 0          | -31.19642666 |
| chr7 | 116030702 | 116030702 | + | 3.33E-16   | 2.11E-14   | -30.63987145 |
| chr7 | 116030911 | 116030911 | - | 0          | 0          | -39.49608611 |
| chr7 | 116030923 | 116030923 | - | 0          | 0          | -39.42070355 |
| chr7 | 116030937 | 116030937 | - | 0          | 0          | -57.11009174 |
| chr7 | 116031161 | 116031161 | - | 9.44E-06   | 0.00015726 | -40          |
| chr7 | 116031179 | 116031179 | - | 9.78E-05   | 0.00123721 | -26.26086957 |
| chr7 | 116225959 | 116225959 | - | 1.55E-09   | 4.99E-08   | -33.6576467  |
| chr7 | 116241196 | 116241196 | - | 0          | 0          | -34.94385232 |
| chr7 | 116241254 | 116241254 | + | 0          | 0          | -26.79425837 |
| chr7 | 117421066 | 117421066 | - | 0          | 0          | -29.41632579 |
| chr7 | 117553283 | 117553283 | + | 0          | 0          | -26.26884946 |
| chr7 | 118490902 | 118490902 | + | 1.14E-08   | 3.24E-07   | -30.73220339 |
| chr7 | 118490925 | 118490925 | + | 1.48E-06   | 2.94E-05   | -26.12483834 |
| chr7 | 118490926 | 118490926 | - | 1.04E-06   | 2.12E-05   | -25.6894307  |
| chr7 | 118490931 | 118490931 | + | 1.11E-16   | 7.26E-15   | -40.33433742 |
| chr7 | 118490932 | 118490932 | - | 2.78E-12   | 1.23E-10   | -36.6674624  |
| chr7 | 118490961 | 118490961 | + | 0          | 0          | -37.55200173 |
| chr7 | 118490962 | 118490962 | - | 1.15E-08   | 3.27E-07   | -28.2462517  |
| chr7 | 118490996 | 118490996 | + | 4.24E-11   | 1.65E-09   | -28.54236725 |
| chr7 | 118490999 | 118490999 | + | 0          | 0          | -52.70611168 |
| chr7 | 118491006 | 118491006 | + | 1.44E-15   | 8.70E-14   | -32.80933285 |
| chr7 | 118595597 | 118595597 | + | 0          | 0          | -32.00123237 |
| chr7 | 118849069 | 118849069 | - | 2.56E-06   | 4.85E-05   | -27.07749767 |
| chr7 | 118849075 | 118849075 | - | 1.33E-05   | 0.00021365 | -25.88427724 |
| chr7 | 119023461 | 119023461 | - | 0.00029857 | 0.0032246  | -35.1010101  |
| chr7 | 119023466 | 119023466 | - | 0.00013047 | 0.0015868  | -37.17105263 |
| chr7 | 121074472 | 121074472 | - | 3.33E-16   | 2.11E-14   | -41.39097744 |
| chr7 | 122290232 | 122290232 | + | 0          | 0          | -29.11753428 |
| chr7 | 122290233 | 122290233 | - | 0          | 0          | -29.13768746 |

|      |           |           |   |            |            |              |
|------|-----------|-----------|---|------------|------------|--------------|
| chr7 | 122290239 | 122290239 | + | 0          | 0          | -28.29868249 |
| chr7 | 122290240 | 122290240 | - | 0          | 0          | -29.19108327 |
| chr7 | 122290253 | 122290253 | + | 0          | 0          | -29.28404662 |
| chr7 | 122820834 | 122820834 | - | 1.60E-06   | 3.15E-05   | -31.26489615 |
| chr7 | 123046817 | 123046817 | - | 7.58E-05   | 0.00099149 | -30.14048531 |
| chr7 | 123117043 | 123117043 | - | 0          | 0          | -25.94218465 |
| chr7 | 124993649 | 124993649 | + | 7.91E-07   | 1.66E-05   | -28.26086957 |
| chr7 | 125471052 | 125471052 | - | 0.0002479  | 0.00275267 | -40          |
| chr7 | 126273869 | 126273869 | + | 0          | 0          | -36.17117117 |
| chr7 | 126586987 | 126586987 | - | 1.82E-05   | 0.00028184 | -35.40229885 |
| chr7 | 126701647 | 126701647 | + | 0.00011246 | 0.00139475 | -26.23626374 |
| chr7 | 126701673 | 126701673 | + | 2.27E-06   | 4.34E-05   | -43.12428078 |
| chr7 | 126763174 | 126763174 | + | 4.30E-12   | 1.86E-10   | -32.90182005 |
| chr7 | 126763175 | 126763175 | - | 0          | 0          | -38.64084247 |
| chr7 | 126763215 | 126763215 | + | 3.33E-16   | 2.11E-14   | -38.57368006 |
| chr7 | 126781466 | 126781466 | - | 1.78E-15   | 1.06E-13   | -27.48808523 |
| chr7 | 126804414 | 126804414 | - | 0          | 0          | -27.81912289 |
| chr7 | 126808165 | 126808165 | - | 0.00050962 | 0.00505502 | -36.42533937 |
| chr7 | 126830060 | 126830060 | - | 3.39E-05   | 0.00049032 | -31.95238095 |
| chr7 | 127121146 | 127121146 | - | 2.63E-10   | 9.32E-09   | -34.68224702 |
| chr7 | 127121178 | 127121178 | + | 0          | 0          | -26.263232   |
| chr7 | 127121188 | 127121188 | + | 0          | 0          | -30.69334153 |
| chr7 | 127121208 | 127121208 | + | 0          | 0          | -33.60881543 |
| chr7 | 127121298 | 127121298 | - | 0          | 0          | -42.20404102 |
| chr7 | 127215007 | 127215007 | - | 0          | 0          | -29.64016376 |
| chr7 | 127363881 | 127363881 | - | 0          | 0          | -25.41116901 |
| chr7 | 127363905 | 127363905 | + | 0          | 0          | -31.78694158 |
| chr7 | 127363935 | 127363935 | + | 0          | 0          | -34.94363249 |
| chr7 | 127542669 | 127542669 | + | 0.00064583 | 0.00615808 | 26.92307692  |
| chr7 | 127691786 | 127691786 | - | 8.77E-15   | 4.93E-13   | -25.49019608 |
| chr7 | 127821583 | 127821583 | - | 3.91E-12   | 1.70E-10   | -30.13415893 |
| chr7 | 127932986 | 127932986 | - | 2.59E-08   | 7.00E-07   | -28.83760684 |
| chr7 | 127933456 | 127933456 | + | 2.46E-05   | 0.00036915 | -28.96916705 |
| chr7 | 127944688 | 127944688 | - | 9.71E-12   | 4.05E-10   | -31.95622435 |
| chr7 | 127944694 | 127944694 | - | 2.10E-09   | 6.63E-08   | -29.70588235 |
| chr7 | 127944704 | 127944704 | - | 1.21E-10   | 4.46E-09   | -27.7124183  |
| chr7 | 127944725 | 127944725 | - | 2.76E-13   | 1.35E-11   | -32.52688172 |
| chr7 | 127944728 | 127944728 | + | 0          | 0          | -25.78146705 |
| chr7 | 127944754 | 127944754 | + | 0          | 0          | -30.68117494 |
| chr7 | 127944764 | 127944764 | + | 0          | 0          | -33.22798577 |
| chr7 | 127944765 | 127944765 | - | 0          | 0          | -39.53895371 |

|      |           |           |   |          |            |              |
|------|-----------|-----------|---|----------|------------|--------------|
| chr7 | 127944784 | 127944784 | - | 0        | 0          | -38.98426864 |
| chr7 | 127944811 | 127944811 | + | 0        | 0          | -28.61655459 |
| chr7 | 127944812 | 127944812 | - | 0        | 0          | -25.32979866 |
| chr7 | 127944836 | 127944836 | + | 0        | 0          | -31.78665861 |
| chr7 | 127944844 | 127944844 | + | 0        | 0          | -37.21542199 |
| chr7 | 127944861 | 127944861 | + | 0        | 0          | -29.76260582 |
| chr7 | 127944902 | 127944902 | - | 0        | 0          | -31.95577441 |
| chr7 | 128004248 | 128004248 | + | 3.44E-05 | 0.00049622 | -28.10659187 |
| chr7 | 128004546 | 128004546 | + | 0        | 0          | -26.96997911 |
| chr7 | 128004552 | 128004552 | - | 0        | 0          | -27.59493671 |
| chr7 | 128004561 | 128004561 | - | 0        | 0          | -27.40268945 |
| chr7 | 128004601 | 128004601 | + | 1.96E-08 | 5.40E-07   | -35.35117057 |
| chr7 | 128004623 | 128004623 | + | 5.02E-08 | 1.30E-06   | -28.51280047 |
| chr7 | 128004627 | 128004627 | + | 4.32E-08 | 1.13E-06   | -32.65585304 |
| chr7 | 128004884 | 128004884 | + | 0        | 0          | -35.62425826 |
| chr7 | 128010138 | 128010138 | + | 0        | 0          | -34.65909522 |
| chr7 | 128010146 | 128010146 | + | 0        | 0          | -32.73812558 |
| chr7 | 128010148 | 128010148 | + | 0        | 0          | -28.49780261 |
| chr7 | 128010210 | 128010210 | - | 0        | 0          | -36.18810739 |
| chr7 | 128010229 | 128010229 | - | 0        | 0          | -25.81392323 |
| chr7 | 128379627 | 128379627 | + | 4.74E-06 | 8.45E-05   | -27.46153846 |
| chr7 | 128379651 | 128379651 | - | 6.59E-08 | 1.67E-06   | -26.29784009 |
| chr7 | 128379656 | 128379656 | - | 2.24E-11 | 8.95E-10   | -35.32154186 |
| chr7 | 128412121 | 128412121 | + | 0        | 0          | -26.99937913 |
| chr7 | 128412131 | 128412131 | + | 0        | 0          | -25.17393321 |
| chr7 | 128412136 | 128412136 | + | 0        | 0          | -26.50281198 |
| chr7 | 128419891 | 128419891 | + | 0        | 0          | -31.96267405 |
| chr7 | 129774693 | 129774693 | + | 2.22E-09 | 6.99E-08   | -27.24596391 |
| chr7 | 130261108 | 130261108 | + | 1.15E-06 | 2.34E-05   | -29.08748005 |
| chr7 | 130369453 | 130369453 | + | 2.47E-13 | 1.21E-11   | -28.88075511 |
| chr7 | 130369476 | 130369476 | + | 0        | 0          | -34.29234292 |
| chr7 | 130835061 | 130835061 | + | 0        | 0          | -28.22045967 |
| chr7 | 130835188 | 130835188 | - | 0        | 0          | -37.30569948 |
| chr7 | 132318365 | 132318365 | + | 0        | 0          | -25.44016928 |
| chr7 | 132459944 | 132459944 | - | 6.31E-07 | 1.35E-05   | -28.49509847 |
| chr7 | 132658328 | 132658328 | + | 0        | 0          | -32.74777209 |
| chr7 | 132658400 | 132658400 | - | 0        | 0          | -25.3984754  |
| chr7 | 132717722 | 132717722 | - | 0        | 0          | -32.87584459 |
| chr7 | 132717761 | 132717761 | - | 0        | 0          | -31.08360312 |
| chr7 | 132754827 | 132754827 | - | 0        | 0          | -30.45524718 |
| chr7 | 133112525 | 133112525 | + | 5.93E-13 | 2.80E-11   | -44.375      |

|      |           |           |   |            |            |              |
|------|-----------|-----------|---|------------|------------|--------------|
| chr7 | 133124776 | 133124776 | - | 0          | 0          | -46.18734548 |
| chr7 | 133124778 | 133124778 | - | 0          | 0          | -38.61301192 |
| chr7 | 133124789 | 133124789 | - | 0          | 0          | -48.55288602 |
| chr7 | 133124798 | 133124798 | - | 0          | 0          | -28.08264918 |
| chr7 | 133700193 | 133700193 | + | 4.24E-13   | 2.03E-11   | -25.03640492 |
| chr7 | 133828764 | 133828764 | - | 3.94E-05   | 0.00055938 | -27.08333333 |
| chr7 | 135055115 | 135055115 | - | 6.12E-12   | 2.60E-10   | -28.47092662 |
| chr7 | 135516743 | 135516743 | - | 0          | 0          | -26.9790225  |
| chr7 | 135516770 | 135516770 | - | 6.66E-16   | 4.13E-14   | -25.62360863 |
| chr7 | 135609564 | 135609564 | + | 0          | 0          | -46.34558738 |
| chr7 | 136022906 | 136022906 | + | 5.31E-14   | 2.78E-12   | -30.64435564 |
| chr7 | 136061058 | 136061058 | - | 0          | 0          | -32.41605011 |
| chr7 | 136588666 | 136588666 | + | 0          | 0          | -31.57122993 |
| chr7 | 136588667 | 136588667 | - | 1.49E-13   | 7.48E-12   | -31.14702029 |
| chr7 | 136825882 | 136825882 | + | 3.16E-06   | 5.86E-05   | -26.66666667 |
| chr7 | 136827154 | 136827154 | - | 0          | 0          | -25.20090526 |
| chr7 | 137322394 | 137322394 | + | 0          | 0          | -26.473325   |
| chr7 | 137974190 | 137974190 | - | 0.0007849  | 0.00723521 | -30.36053131 |
| chr7 | 138040858 | 138040858 | - | 0.00053215 | 0.0052417  | 30           |
| chr7 | 139234290 | 139234290 | - | 0          | 0          | -26.04388715 |
| chr7 | 139247500 | 139247500 | + | 1.22E-15   | 7.41E-14   | -29.19201317 |
| chr7 | 139247523 | 139247523 | + | 0          | 0          | -44.2002109  |
| chr7 | 139247524 | 139247524 | - | 0          | 0          | -44.62017458 |
| chr7 | 139247531 | 139247531 | - | 3.33E-16   | 2.11E-14   | -35.9596194  |
| chr7 | 139247549 | 139247549 | + | 0          | 0          | -39.40540422 |
| chr7 | 139247550 | 139247550 | - | 0          | 0          | -45.17767573 |
| chr7 | 139247557 | 139247557 | + | 0          | 0          | -40.66990816 |
| chr7 | 139247558 | 139247558 | - | 0          | 0          | -43.00414569 |
| chr7 | 139247561 | 139247561 | + | 0          | 0          | -47.38648006 |
| chr7 | 139247562 | 139247562 | - | 0          | 0          | -42.80211208 |
| chr7 | 139247564 | 139247564 | + | 0.00013941 | 0.0016803  | -30.62435501 |
| chr7 | 139247568 | 139247568 | + | 5.03E-06   | 8.92E-05   | -40.28169014 |
| chr7 | 139247569 | 139247569 | - | 4.90E-05   | 0.0006783  | -51.04651163 |
| chr7 | 139247571 | 139247571 | + | 1.49E-05   | 0.00023693 | -38.39009288 |
| chr7 | 139247572 | 139247572 | - | 2.37E-07   | 5.47E-06   | -63.64468864 |
| chr7 | 139247604 | 139247604 | + | 2.83E-07   | 6.45E-06   | -45.66807855 |
| chr7 | 139247605 | 139247605 | - | 1.17E-11   | 4.85E-10   | -66.37931034 |
| chr7 | 139247611 | 139247611 | - | 1.67E-05   | 0.00026154 | -39.86415883 |
| chr7 | 139296904 | 139296904 | - | 1.07E-07   | 2.61E-06   | -37.38692169 |
| chr7 | 139296908 | 139296908 | - | 1.24E-05   | 0.00020024 | -33.17831517 |
| chr7 | 139364199 | 139364199 | + | 0          | 0          | -26.93708253 |

|      |           |           |   |            |            |              |
|------|-----------|-----------|---|------------|------------|--------------|
| chr7 | 139364330 | 139364330 | - | 0          | 0          | -32.85965334 |
| chr7 | 139364332 | 139364332 | - | 0          | 0          | -42.70143246 |
| chr7 | 139364338 | 139364338 | + | 3.00E-08   | 8.02E-07   | -26.17647059 |
| chr7 | 139364339 | 139364339 | - | 0          | 0          | -34.79986197 |
| chr7 | 139441272 | 139441272 | - | 0.00060762 | 0.00585368 | -26.17680827 |
| chr7 | 139945462 | 139945462 | + | 0          | 0          | -33.70314154 |
| chr7 | 139945672 | 139945672 | + | 0          | 0          | -38.23789783 |
| chr7 | 139945697 | 139945697 | + | 0          | 0          | -39.34127191 |
| chr7 | 139945698 | 139945698 | - | 0          | 0          | -37.70852138 |
| chr7 | 139945999 | 139945999 | - | 0.00027134 | 0.0029738  | -28.95167895 |
| chr7 | 139946018 | 139946018 | - | 0.00040636 | 0.00417917 | -28.47058824 |
| chr7 | 140921886 | 140921886 | + | 0          | 0          | -25.15214724 |
| chr7 | 140956572 | 140956572 | - | 0          | 0          | -26.64072892 |
| chr7 | 141092188 | 141092188 | - | 0.0005971  | 0.00576881 | -34.92239468 |
| chr7 | 141221452 | 141221452 | + | 0          | 0          | -32.98783213 |
| chr7 | 141221453 | 141221453 | - | 0          | 0          | -31.37774413 |
| chr7 | 141339222 | 141339222 | - | 0          | 0          | -61.26900198 |
| chr7 | 141339234 | 141339234 | + | 0          | 0          | -30.13764873 |
| chr7 | 141339271 | 141339271 | + | 0          | 0          | -32.68413467 |
| chr7 | 141339280 | 141339280 | + | 0          | 0          | -40.39570327 |
| chr7 | 141339347 | 141339347 | - | 0          | 0          | -26.95423433 |
| chr7 | 141339351 | 141339351 | - | 0          | 0          | -28.24438114 |
| chr7 | 141339365 | 141339365 | + | 0          | 0          | -25.10215841 |
| chr7 | 141339373 | 141339373 | + | 0          | 0          | -32.75008135 |
| chr7 | 141339392 | 141339392 | + | 0          | 0          | -41.17621363 |
| chr7 | 141339393 | 141339393 | - | 0          | 0          | -46.62448228 |
| chr7 | 141339411 | 141339411 | + | 0          | 0          | -30.20289499 |
| chr7 | 141339412 | 141339412 | - | 0          | 0          | -34.87374694 |
| chr7 | 141339428 | 141339428 | - | 0          | 0          | -48.10074965 |
| chr7 | 141339439 | 141339439 | - | 0          | 0          | -40.92375648 |
| chr7 | 141429255 | 141429255 | + | 1.73E-09   | 5.51E-08   | -39.54263566 |
| chr7 | 141429280 | 141429280 | + | 1.94E-11   | 7.81E-10   | -43.14319492 |
| chr7 | 141429290 | 141429290 | + | 2.17E-06   | 4.18E-05   | -30.9982878  |
| chr7 | 141429296 | 141429296 | + | 7.86E-10   | 2.63E-08   | -39.6919692  |
| chr7 | 141429428 | 141429428 | + | 0          | 0          | -26.77947968 |
| chr7 | 141429432 | 141429432 | + | 0          | 0          | -44.81890486 |
| chr7 | 141429461 | 141429461 | + | 0          | 0          | -30.46998861 |
| chr7 | 141429462 | 141429462 | - | 0          | 0          | -30.60382068 |
| chr7 | 141429473 | 141429473 | + | 0          | 0          | -39.01316873 |
| chr7 | 141429474 | 141429474 | - | 0          | 0          | -38.10305484 |
| chr7 | 141429488 | 141429488 | - | 0          | 0          | -40.76671473 |

|      |           |           |   |            |            |              |
|------|-----------|-----------|---|------------|------------|--------------|
| chr7 | 141429577 | 141429577 | - | 0          | 0          | -27.68971963 |
| chr7 | 141454449 | 141454449 | - | 9.26E-05   | 0.00117967 | -33.09090909 |
| chr7 | 141465229 | 141465229 | + | 0          | 0          | -33.60791873 |
| chr7 | 141465234 | 141465234 | + | 0          | 0          | -32.31421356 |
| chr7 | 141465235 | 141465235 | - | 0          | 0          | -38.26964682 |
| chr7 | 141465246 | 141465246 | + | 0          | 0          | -34.95494823 |
| chr7 | 141465247 | 141465247 | - | 0          | 0          | -36.04861639 |
| chr7 | 141465248 | 141465248 | + | 0          | 0          | -42.69410276 |
| chr7 | 141465249 | 141465249 | - | 0          | 0          | -41.68983087 |
| chr7 | 141465274 | 141465274 | - | 0          | 0          | -25.95466492 |
| chr7 | 141482351 | 141482351 | - | 0          | 0          | -26.06909552 |
| chr7 | 141482352 | 141482352 | + | 0          | 0          | -28.36683091 |
| chr7 | 141482353 | 141482353 | - | 0          | 0          | -32.22101842 |
| chr7 | 141482368 | 141482368 | + | 0          | 0          | -25.79903747 |
| chr7 | 141482369 | 141482369 | - | 0          | 0          | -31.48613307 |
| chr7 | 141482417 | 141482417 | + | 2.88E-06   | 5.40E-05   | -25.03865581 |
| chr7 | 141482427 | 141482427 | + | 3.19E-08   | 8.49E-07   | -26.81818182 |
| chr7 | 141482546 | 141482546 | - | 2.63E-07   | 6.03E-06   | -34.61746175 |
| chr7 | 141482597 | 141482597 | + | 0          | 0          | -38.53462447 |
| chr7 | 142082864 | 142082864 | - | 6.10E-06   | 0.00010611 | -26.81721948 |
| chr7 | 142372564 | 142372564 | - | 0          | 0          | -25.94478634 |
| chr7 | 142461891 | 142461891 | - | 0          | 0          | -39.58984099 |
| chr7 | 142461898 | 142461898 | - | 0          | 0          | -29.40565352 |
| chr7 | 142499566 | 142499566 | + | 0          | 0          | -25.75845685 |
| chr7 | 142505202 | 142505202 | - | 0          | 0          | -29.59921734 |
| chr7 | 142542917 | 142542917 | + | 0          | 0          | -39.34645613 |
| chr7 | 142543061 | 142543061 | - | 0          | 0          | -32.79593018 |
| chr7 | 142571641 | 142571641 | + | 2.78E-15   | 1.63E-13   | -25.31652361 |
| chr7 | 142609408 | 142609408 | - | 0.00015682 | 0.00186003 | -25.51127637 |
| chr7 | 142665138 | 142665138 | - | 8.51E-05   | 0.00109621 | -30.16260163 |
| chr7 | 143082135 | 143082135 | + | 6.48E-06   | 0.00011214 | -28.69415808 |
| chr7 | 143154450 | 143154450 | - | 0.00035347 | 0.0037177  | -33.91465677 |
| chr7 | 143154469 | 143154469 | - | 0.00096357 | 0.00856573 | -30.66666667 |
| chr7 | 143154789 | 143154789 | + | 0          | 0          | -51.43188854 |
| chr7 | 143154956 | 143154956 | - | 0          | 0          | -25.75615051 |
| chr7 | 143159330 | 143159330 | + | 0          | 0          | -37.16478549 |
| chr7 | 143366622 | 143366622 | - | 1.29E-07   | 3.12E-06   | -27.7129771  |
| chr7 | 143370523 | 143370523 | - | 0          | 0          | -29.52743551 |
| chr7 | 143373301 | 143373301 | - | 0          | 0          | -26.9874161  |
| chr7 | 143408699 | 143408699 | + | 1.11E-16   | 7.26E-15   | -36.94982394 |
| chr7 | 143437790 | 143437790 | + | 0          | 0          | -35.00766504 |

|      |           |           |   |            |            |              |
|------|-----------|-----------|---|------------|------------|--------------|
| chr7 | 143437791 | 143437791 | - | 1.17E-09   | 3.81E-08   | -40.55429864 |
| chr7 | 143437812 | 143437812 | + | 0          | 0          | -30.83620772 |
| chr7 | 143437814 | 143437814 | + | 0          | 0          | -30.98945949 |
| chr7 | 143437815 | 143437815 | - | 0          | 0          | -31.9145375  |
| chr7 | 143437822 | 143437822 | + | 0          | 0          | -33.59301172 |
| chr7 | 143437823 | 143437823 | - | 0          | 0          | -32.93367734 |
| chr7 | 143437835 | 143437835 | + | 0          | 0          | -35.50263207 |
| chr7 | 143437836 | 143437836 | - | 0          | 0          | -35.59647794 |
| chr7 | 143437852 | 143437852 | - | 1.08E-07   | 2.64E-06   | -51.70940171 |
| chr7 | 143437867 | 143437867 | - | 0.00029053 | 0.00315057 | -27.66884532 |
| chr7 | 143438452 | 143438452 | - | 0          | 0          | -28.43025796 |
| chr7 | 143438471 | 143438471 | - | 0          | 0          | -35.68242688 |
| chr7 | 143446322 | 143446322 | - | 7.77E-15   | 4.39E-13   | -46.42857143 |
| chr7 | 144470153 | 144470153 | - | 0          | 0          | -27.29956528 |
| chr7 | 144592036 | 144592036 | + | 3.28E-08   | 8.71E-07   | -30.90579405 |
| chr7 | 144677925 | 144677925 | + | 1.91E-11   | 7.72E-10   | -25.26041667 |
| chr7 | 144839856 | 144839856 | + | 0          | 0          | -30.2217886  |
| chr7 | 144839860 | 144839860 | + | 0          | 0          | -32.37519361 |
| chr7 | 144839861 | 144839861 | - | 0          | 0          | -25.71098395 |
| chr7 | 144932567 | 144932567 | - | 0          | 0          | -30.68046572 |
| chr7 | 144932591 | 144932591 | - | 0          | 0          | -27.52086077 |
| chr7 | 144932599 | 144932599 | - | 0          | 0          | -27.02589808 |
| chr7 | 144934016 | 144934016 | + | 0          | 0          | -32.86717466 |
| chr7 | 144934017 | 144934017 | - | 0          | 0          | -38.7867705  |
| chr7 | 144934049 | 144934049 | + | 0          | 0          | -42.30970179 |
| chr7 | 144934056 | 144934056 | + | 2.98E-14   | 1.59E-12   | -28.04646292 |
| chr7 | 144960649 | 144960649 | - | 0          | 0          | -25.11394892 |
| chr7 | 145206057 | 145206057 | - | 7.77E-16   | 4.79E-14   | -29.70011078 |
| chr7 | 145206119 | 145206119 | + | 3.92E-09   | 1.19E-07   | -38.45162569 |
| chr7 | 145206571 | 145206571 | + | 1.11E-16   | 7.26E-15   | -35.35664069 |
| chr8 | 3393140   | 3393140   | - | 0          | 0          | -25.16311377 |
| chr8 | 4205985   | 4205985   | + | 0          | 0          | -50.91987922 |
| chr8 | 4205994   | 4205994   | + | 0          | 0          | -46.00188781 |
| chr8 | 4206028   | 4206028   | + | 0          | 0          | -48.48152578 |
| chr8 | 4206185   | 4206185   | + | 1.11E-16   | 7.26E-15   | -25.63170949 |
| chr8 | 4206186   | 4206186   | - | 7.33E-07   | 1.55E-05   | -30.40365878 |
| chr8 | 4206206   | 4206206   | + | 0          | 0          | -53.54679335 |
| chr8 | 4206207   | 4206207   | - | 0          | 0          | -57.52564103 |
| chr8 | 4206218   | 4206218   | - | 0          | 0          | -44.35067127 |
| chr8 | 4206226   | 4206226   | + | 0          | 0          | -38.63939471 |
| chr8 | 4206244   | 4206244   | + | 0          | 0          | -47.3699506  |

|      |          |          |   |          |            |              |
|------|----------|----------|---|----------|------------|--------------|
| chr8 | 4206245  | 4206245  | - | 0        | 0          | -48.13206326 |
| chr8 | 4206269  | 4206269  | + | 0        | 0          | -46.98949586 |
| chr8 | 4206270  | 4206270  | - | 0        | 0          | -48.375505   |
| chr8 | 4206279  | 4206279  | - | 0        | 0          | -49.73428667 |
| chr8 | 4206290  | 4206290  | - | 0        | 0          | -43.34299976 |
| chr8 | 4249361  | 4249361  | + | 7.26E-08 | 1.83E-06   | -28.9039039  |
| chr8 | 4249593  | 4249593  | + | 0        | 0          | -25.78252017 |
| chr8 | 4249622  | 4249622  | + | 1.38E-06 | 2.76E-05   | -48.92026578 |
| chr8 | 8489829  | 8489829  | + | 0        | 0          | -43.05207712 |
| chr8 | 8489847  | 8489847  | + | 0        | 0          | -35.31240522 |
| chr8 | 8489848  | 8489848  | - | 0        | 0          | -37.38538501 |
| chr8 | 8830867  | 8830867  | - | 0        | 0          | -29.19663163 |
| chr8 | 8992045  | 8992045  | + | 0        | 0          | -48.46659034 |
| chr8 | 8992063  | 8992063  | + | 0        | 0          | -52.22486525 |
| chr8 | 8992129  | 8992129  | - | 0        | 0          | -33.43441815 |
| chr8 | 10718391 | 10718391 | + | 3.42E-05 | 0.00049335 | -46.04462475 |
| chr8 | 10854305 | 10854305 | - | 0        | 0          | -33.4965725  |
| chr8 | 10854395 | 10854395 | - | 2.07E-06 | 4.00E-05   | -26.79738562 |
| chr8 | 10854400 | 10854400 | - | 5.20E-06 | 9.19E-05   | -25.01298701 |
| chr8 | 10899994 | 10899994 | - | 1.11E-16 | 7.26E-15   | -26.84326711 |
| chr8 | 10923863 | 10923863 | + | 0        | 0          | -27.97143495 |
| chr8 | 10960597 | 10960597 | - | 0        | 0          | -41.55326917 |
| chr8 | 10961856 | 10961856 | + | 1.11E-16 | 7.26E-15   | -26.4822504  |
| chr8 | 10961877 | 10961877 | + | 0        | 0          | -39.65066517 |
| chr8 | 10961878 | 10961878 | - | 1.44E-15 | 8.70E-14   | -36.15565702 |
| chr8 | 10961880 | 10961880 | + | 0        | 0          | -36.62305214 |
| chr8 | 10961881 | 10961881 | - | 2.67E-12 | 1.18E-10   | -31.52255639 |
| chr8 | 10961891 | 10961891 | - | 0        | 0          | -45.3946219  |
| chr8 | 11005396 | 11005396 | + | 0        | 0          | -28.36761171 |
| chr8 | 11279574 | 11279574 | - | 0        | 0          | -32.936786   |
| chr8 | 11308944 | 11308944 | + | 2.83E-10 | 9.99E-09   | -26.41494069 |
| chr8 | 11394994 | 11394994 | + | 0        | 0          | -34.43026927 |
| chr8 | 11395038 | 11395038 | - | 0        | 0          | -35.66031672 |
| chr8 | 11431706 | 11431706 | + | 2.63E-05 | 0.00039206 | -43.75340971 |
| chr8 | 11479445 | 11479445 | - | 2.44E-06 | 4.64E-05   | -25.34722222 |
| chr8 | 12677491 | 12677491 | + | 5.06E-08 | 1.31E-06   | -31.42307692 |
| chr8 | 12757900 | 12757900 | - | 0        | 0          | -25.46295266 |
| chr8 | 12926192 | 12926192 | + | 0        | 0          | -55.9860895  |
| chr8 | 12926202 | 12926202 | + | 0        | 0          | -51.04591837 |
| chr8 | 12926408 | 12926408 | - | 1.11E-05 | 0.00018125 | -26.64229534 |
| chr8 | 12931774 | 12931774 | + | 0        | 0          | -28.9806846  |



|      |          |          |   |            |            |              |
|------|----------|----------|---|------------|------------|--------------|
| chr8 | 12931801 | 12931801 | + | 1.11E-16   | 7.26E-15   | -28.59412573 |
| chr8 | 12931802 | 12931802 | - | 0          | 0          | -31.76755259 |
| chr8 | 12931811 | 12931811 | - | 7.77E-16   | 4.79E-14   | -26.24233129 |
| chr8 | 12936011 | 12936011 | + | 0.00076815 | 0.00710737 | -28.93145161 |
| chr8 | 12948566 | 12948566 | - | 0          | 0          | -25.85234867 |
| chr8 | 13195557 | 13195557 | - | 0.00024467 | 0.00272164 | -39.50546291 |
| chr8 | 13199778 | 13199778 | + | 2.24E-10   | 8.01E-09   | -27.15924852 |
| chr8 | 13493224 | 13493224 | + | 8.63E-13   | 4.01E-11   | -30.26105874 |
| chr8 | 13493239 | 13493239 | + | 2.33E-15   | 1.38E-13   | -32.5772682  |
| chr8 | 13519727 | 13519727 | + | 0          | 0          | -27.41813087 |
| chr8 | 13705982 | 13705982 | + | 0          | 0          | -25.39298767 |
| chr8 | 13743175 | 13743175 | - | 8.48E-05   | 0.00109275 | -30.43478261 |
| chr8 | 13748132 | 13748132 | + | 2.55E-14   | 1.38E-12   | -37.60602389 |
| chr8 | 14474767 | 14474767 | - | 0.00030975 | 0.0033263  | 26.45021645  |
| chr8 | 15014295 | 15014295 | + | 0          | 0          | -29.00848765 |
| chr8 | 15029128 | 15029128 | - | 4.59E-07   | 1.00E-05   | -28.04951238 |
| chr8 | 15036528 | 15036528 | + | 0          | 0          | -25.1372973  |
| chr8 | 17535307 | 17535307 | + | 0.00070865 | 0.00664827 | -25.51834131 |
| chr8 | 19542083 | 19542083 | + | 0.00013999 | 0.00168639 | 29.42942943  |
| chr8 | 20968835 | 20968835 | + | 2.86E-07   | 6.51E-06   | 45.37480064  |
| chr8 | 22447207 | 22447207 | - | 2.46E-10   | 8.76E-09   | -32.22776074 |
| chr8 | 22617306 | 22617306 | - | 1.89E-13   | 9.36E-12   | -33.76123235 |
| chr8 | 22617310 | 22617310 | - | 8.40E-10   | 2.80E-08   | -26.67309547 |
| chr8 | 22713782 | 22713782 | + | 1.33E-11   | 5.45E-10   | -27.38738739 |
| chr8 | 22713797 | 22713797 | + | 1.11E-14   | 6.18E-13   | -29.16145181 |
| chr8 | 22713994 | 22713994 | - | 9.20E-06   | 0.00015362 | -25.48717949 |
| chr8 | 22714005 | 22714005 | - | 7.92E-07   | 1.66E-05   | -27.71308017 |
| chr8 | 23035004 | 23035004 | + | 8.88E-16   | 5.45E-14   | -30.77969527 |
| chr8 | 23035042 | 23035042 | + | 0          | 0          | -32.35997714 |
| chr8 | 23399436 | 23399436 | - | 9.97E-10   | 3.29E-08   | -30.26470424 |
| chr8 | 23688713 | 23688713 | + | 4.44E-16   | 2.79E-14   | -26.16242637 |
| chr8 | 24676792 | 24676792 | + | 0.00010354 | 0.0012997  | -30.11734029 |
| chr8 | 25037157 | 25037157 | - | 2.50E-10   | 8.87E-09   | -25.87245868 |
| chr8 | 25043530 | 25043530 | + | 1.87E-08   | 5.15E-07   | -25.68645293 |
| chr8 | 25098297 | 25098297 | + | 0          | 0          | -25.50162714 |
| chr8 | 25103940 | 25103940 | + | 0          | 0          | -35.7488484  |
| chr8 | 25103967 | 25103967 | + | 0          | 0          | -34.70967131 |
| chr8 | 25103968 | 25103968 | - | 0          | 0          | -31.84126178 |
| chr8 | 25104002 | 25104002 | - | 0          | 0          | -27.01546001 |
| chr8 | 25368693 | 25368693 | + | 0          | 0          | -43.23436922 |
| chr8 | 25368699 | 25368699 | + | 0          | 0          | -28.1459797  |

|      |          |          |   |          |            |              |
|------|----------|----------|---|----------|------------|--------------|
| chr8 | 25368878 | 25368878 | + | 0        | 0          | -43.22053126 |
| chr8 | 25368879 | 25368879 | - | 0        | 0          | -48.53611053 |
| chr8 | 25368961 | 25368961 | - | 4.98E-12 | 2.14E-10   | -35.47494947 |
| chr8 | 25369011 | 25369011 | - | 0        | 0          | -52.92849443 |
| chr8 | 25501835 | 25501835 | - | 3.37E-11 | 1.32E-09   | -30.2615193  |
| chr8 | 25501837 | 25501837 | + | 0        | 0          | -30.04734848 |
| chr8 | 25501838 | 25501838 | - | 1.08E-12 | 4.99E-11   | -31.82926829 |
| chr8 | 25501845 | 25501845 | + | 0        | 0          | -30.98444894 |
| chr8 | 25501950 | 25501950 | - | 0        | 0          | -30.1238534  |
| chr8 | 25514676 | 25514676 | + | 0        | 0          | -35.85032569 |
| chr8 | 25514708 | 25514708 | + | 0        | 0          | -34.14106246 |
| chr8 | 25514709 | 25514709 | - | 0        | 0          | -44.45533578 |
| chr8 | 25514807 | 25514807 | - | 0        | 0          | -25.50376487 |
| chr8 | 25514845 | 25514845 | + | 0        | 0          | -27.72221285 |
| chr8 | 25514846 | 25514846 | - | 0        | 0          | -28.47002249 |
| chr8 | 26103474 | 26103474 | + | 0        | 0          | -26.90548765 |
| chr8 | 26273836 | 26273836 | - | 2.05E-08 | 5.61E-07   | -40.88491296 |
| chr8 | 26507792 | 26507792 | + | 3.94E-06 | 7.15E-05   | -26.15705931 |
| chr8 | 26656879 | 26656879 | + | 3.58E-05 | 0.00051418 | -25.47699214 |
| chr8 | 26673393 | 26673393 | - | 0        | 0          | -26.2965086  |
| chr8 | 26771248 | 26771248 | + | 3.40E-06 | 6.28E-05   | -30.89339339 |
| chr8 | 26960256 | 26960256 | - | 0        | 0          | -33.63195835 |
| chr8 | 26961636 | 26961636 | + | 0        | 0          | -26.33716445 |
| chr8 | 26973674 | 26973674 | - | 0        | 0          | -32.61228545 |
| chr8 | 26979285 | 26979285 | - | 0        | 0          | -39.76236875 |
| chr8 | 26979291 | 26979291 | - | 0        | 0          | -34.40353757 |
| chr8 | 26979294 | 26979294 | - | 0        | 0          | -28.3436277  |
| chr8 | 26979301 | 26979301 | + | 0        | 0          | -31.19569425 |
| chr8 | 26979311 | 26979311 | + | 0        | 0          | -28.55178029 |
| chr8 | 26979362 | 26979362 | + | 3.66E-15 | 2.14E-13   | -28.87644111 |
| chr8 | 26979406 | 26979406 | + | 0        | 0          | -47.55566045 |
| chr8 | 26979488 | 26979488 | - | 0        | 0          | -53.29168581 |
| chr8 | 26979495 | 26979495 | - | 0        | 0          | -35.78208129 |
| chr8 | 26979498 | 26979498 | - | 0        | 0          | -41.32485427 |
| chr8 | 26979522 | 26979522 | - | 0        | 0          | -34.55136293 |
| chr8 | 26979524 | 26979524 | - | 0        | 0          | -36.38578381 |
| chr8 | 26979528 | 26979528 | - | 0        | 0          | -38.87010579 |
| chr8 | 26979533 | 26979533 | - | 0        | 0          | -39.63242923 |
| chr8 | 26979536 | 26979536 | + | 0        | 0          | -47.86509453 |
| chr8 | 26979537 | 26979537 | - | 0        | 0          | -42.67430855 |
| chr8 | 26979577 | 26979577 | + | 0        | 0          | -31.15878602 |

|      |          |          |   |          |          |              |
|------|----------|----------|---|----------|----------|--------------|
| chr8 | 26979578 | 26979578 | - | 0        | 0        | -30.25799346 |
| chr8 | 26979598 | 26979598 | + | 0        | 0        | -43.38748549 |
| chr8 | 26979599 | 26979599 | - | 0        | 0        | -43.42195668 |
| chr8 | 26979601 | 26979601 | + | 0        | 0        | -38.20913438 |
| chr8 | 26979602 | 26979602 | - | 0        | 0        | -41.9759844  |
| chr8 | 26979614 | 26979614 | + | 0        | 0        | -45.5696549  |
| chr8 | 26979615 | 26979615 | - | 0        | 0        | -46.34096034 |
| chr8 | 26979617 | 26979617 | + | 0        | 0        | -47.66581734 |
| chr8 | 26979618 | 26979618 | - | 0        | 0        | -39.91649026 |
| chr8 | 26979626 | 26979626 | + | 0        | 0        | -40.8811442  |
| chr8 | 26979627 | 26979627 | - | 0        | 0        | -38.48128642 |
| chr8 | 26979634 | 26979634 | + | 0        | 0        | -46.06818182 |
| chr8 | 26979635 | 26979635 | - | 0        | 0        | -42.9251037  |
| chr8 | 26979674 | 26979674 | + | 0        | 0        | -53.01298198 |
| chr8 | 26979679 | 26979679 | + | 0        | 0        | -45.17877292 |
| chr8 | 26979766 | 26979766 | - | 0        | 0        | -46.18564044 |
| chr8 | 26979784 | 26979784 | + | 0        | 0        | -51.75179401 |
| chr8 | 26979785 | 26979785 | - | 0        | 0        | -45.99115158 |
| chr8 | 26979788 | 26979788 | + | 0        | 0        | -39.51082085 |
| chr8 | 26979789 | 26979789 | - | 0        | 0        | -37.60064412 |
| chr8 | 26979806 | 26979806 | + | 0        | 0        | -45.12608443 |
| chr8 | 26979807 | 26979807 | - | 0        | 0        | -38.53640526 |
| chr8 | 26979815 | 26979815 | + | 0        | 0        | -49.77930144 |
| chr8 | 26979816 | 26979816 | - | 0        | 0        | -45.87431694 |
| chr8 | 26979820 | 26979820 | + | 0        | 0        | -42.38590951 |
| chr8 | 26979823 | 26979823 | + | 0        | 0        | -42.24917828 |
| chr8 | 26979839 | 26979839 | + | 0        | 0        | -31.00173161 |
| chr8 | 26979848 | 26979848 | + | 0        | 0        | -28.96592826 |
| chr8 | 26979891 | 26979891 | - | 0        | 0        | -43.78845057 |
| chr8 | 26979908 | 26979908 | + | 0        | 0        | -45.6267034  |
| chr8 | 26979909 | 26979909 | - | 0        | 0        | -30.49802882 |
| chr8 | 26979913 | 26979913 | + | 0        | 0        | -42.60717344 |
| chr8 | 26979924 | 26979924 | + | 0        | 0        | -27.84372513 |
| chr8 | 26980007 | 26980007 | - | 0        | 0        | -25.42560798 |
| chr8 | 26980220 | 26980220 | - | 0        | 0        | -36.89205219 |
| chr8 | 26981348 | 26981348 | + | 0        | 0        | -29.32022364 |
| chr8 | 26981349 | 26981349 | - | 0        | 0        | -36.67387237 |
| chr8 | 27091498 | 27091498 | - | 0        | 0        | -31.28329016 |
| chr8 | 27160178 | 27160178 | - | 0        | 0        | -30.53232538 |
| chr8 | 27252175 | 27252175 | - | 0        | 0        | -34.1854197  |
| chr8 | 27273294 | 27273294 | + | 1.88E-11 | 7.61E-10 | -26.09395109 |

|      |          |          |   |            |            |              |
|------|----------|----------|---|------------|------------|--------------|
| chr8 | 31169434 | 31169434 | + | 8.89E-07   | 1.85E-05   | -27.45106862 |
| chr8 | 31380886 | 31380886 | - | 1.86E-09   | 5.92E-08   | -26.66666667 |
| chr8 | 33386585 | 33386585 | + | 0          | 0          | -27.96463404 |
| chr8 | 33386591 | 33386591 | + | 0          | 0          | -27.21564035 |
| chr8 | 33386592 | 33386592 | - | 0          | 0          | -29.76180252 |
| chr8 | 33386790 | 33386790 | - | 0          | 0          | -25.36206383 |
| chr8 | 33607193 | 33607193 | + | 0          | 0          | -38.95625201 |
| chr8 | 33607224 | 33607224 | + | 0          | 0          | -31.56288342 |
| chr8 | 33607225 | 33607225 | - | 5.55E-15   | 3.18E-13   | -28.51173674 |
| chr8 | 33607231 | 33607231 | - | 0          | 0          | -32.4940239  |
| chr8 | 33607234 | 33607234 | + | 1.39E-10   | 5.11E-09   | -46.46464646 |
| chr8 | 33607238 | 33607238 | + | 3.93E-09   | 1.19E-07   | -46.2594697  |
| chr8 | 33607242 | 33607242 | + | 5.45E-06   | 9.60E-05   | -33.86994949 |
| chr8 | 33805555 | 33805555 | + | 1.73E-09   | 5.53E-08   | -25.30819754 |
| chr8 | 33805556 | 33805556 | - | 0          | 0          | -26.28565602 |
| chr8 | 33805857 | 33805857 | + | 0.00071987 | 0.00673533 | -27.87025181 |
| chr8 | 33806551 | 33806551 | - | 1.73E-05   | 0.00026962 | -38.59543818 |
| chr8 | 33806560 | 33806560 | - | 2.45E-07   | 5.65E-06   | -35.83433373 |
| chr8 | 33885595 | 33885595 | - | 0          | 0          | -29.32031107 |
| chr8 | 33885629 | 33885629 | + | 0          | 0          | -38.58647263 |
| chr8 | 33914198 | 33914198 | + | 5.19E-09   | 1.55E-07   | -29.20650592 |
| chr8 | 33914199 | 33914199 | - | 0          | 0          | -28.73309089 |
| chr8 | 33914221 | 33914221 | + | 2.14E-08   | 5.84E-07   | -25.95874039 |
| chr8 | 33914222 | 33914222 | - | 0          | 0          | -34.6248366  |
| chr8 | 33914229 | 33914229 | + | 2.47E-09   | 7.73E-08   | -32.13448922 |
| chr8 | 33914230 | 33914230 | - | 2.57E-12   | 1.14E-10   | -27.6980711  |
| chr8 | 33914730 | 33914730 | + | 4.80E-10   | 1.65E-08   | -29.79282622 |
| chr8 | 33914771 | 33914771 | + | 0          | 0          | -42.23065706 |
| chr8 | 33914772 | 33914772 | - | 0          | 0          | -36.07053037 |
| chr8 | 33914801 | 33914801 | - | 0          | 0          | -30.66691319 |
| chr8 | 33916737 | 33916737 | + | 5.32E-08   | 1.37E-06   | -33.26741573 |
| chr8 | 33916769 | 33916769 | + | 5.83E-09   | 1.73E-07   | -27.91111111 |
| chr8 | 33916968 | 33916968 | - | 6.28E-05   | 0.00084231 | -29.77006858 |
| chr8 | 33917213 | 33917213 | - | 6.46E-06   | 0.00011181 | -28.43676355 |
| chr8 | 33917218 | 33917218 | - | 1.18E-08   | 3.36E-07   | -32.18325792 |
| chr8 | 34075037 | 34075037 | - | 1.53E-11   | 6.24E-10   | -28.24074074 |
| chr8 | 34076063 | 34076063 | - | 0          | 0          | -25.58120564 |
| chr8 | 34076285 | 34076285 | - | 2.82E-06   | 5.30E-05   | -30.57280883 |
| chr8 | 34472566 | 34472566 | + | 0.00014174 | 0.00170461 | -32.87981859 |
| chr8 | 34486197 | 34486197 | - | 2.84E-14   | 1.53E-12   | -27.48015873 |
| chr8 | 34676686 | 34676686 | - | 4.21E-09   | 1.27E-07   | -30.19899103 |

|      |          |          |   |            |            |              |
|------|----------|----------|---|------------|------------|--------------|
| chr8 | 34676696 | 34676696 | + | 6.95E-10   | 2.34E-08   | -27.09458331 |
| chr8 | 34676867 | 34676867 | - | 0          | 0          | -28.60803608 |
| chr8 | 34680025 | 34680025 | + | 0          | 0          | -39.21978613 |
| chr8 | 34680043 | 34680043 | + | 0          | 0          | -35.24652645 |
| chr8 | 34680044 | 34680044 | - | 0          | 0          | -30.11204482 |
| chr8 | 34680046 | 34680046 | + | 0          | 0          | -33.15243125 |
| chr8 | 34680047 | 34680047 | - | 0          | 0          | -27.71659485 |
| chr8 | 34680072 | 34680072 | - | 0          | 0          | -31.55184812 |
| chr8 | 34680078 | 34680078 | + | 7.25E-06   | 0.00012397 | -29.12543728 |
| chr8 | 34680094 | 34680094 | + | 7.33E-05   | 0.00096324 | -27.47626187 |
| chr8 | 34680096 | 34680096 | + | 3.43E-08   | 9.09E-07   | -39.00928793 |
| chr8 | 34703547 | 34703547 | + | 8.39E-08   | 2.09E-06   | -40.20002986 |
| chr8 | 34810085 | 34810085 | + | 0          | 0          | -30.44932505 |
| chr8 | 35357072 | 35357072 | - | 0          | 0          | -28.44394985 |
| chr8 | 35385090 | 35385090 | + | 7.73E-05   | 0.00100791 | -30.73245362 |
| chr8 | 35513128 | 35513128 | - | 0.00032606 | 0.00347362 | -27.69272827 |
| chr8 | 35588772 | 35588772 | + | 0          | 0          | -29.92784211 |
| chr8 | 35589274 | 35589274 | - | 0.00019629 | 0.00225497 | -38.31734961 |
| chr8 | 35589308 | 35589308 | + | 0          | 0          | -25.486763   |
| chr8 | 35589318 | 35589318 | + | 0          | 0          | -26.0225111  |
| chr8 | 36101613 | 36101613 | + | 0          | 0          | -25.93333665 |
| chr8 | 36121832 | 36121832 | + | 0          | 0          | -42.67588664 |
| chr8 | 36121862 | 36121862 | + | 0          | 0          | -33.49449138 |
| chr8 | 36121864 | 36121864 | + | 0          | 0          | -42.66459484 |
| chr8 | 36121881 | 36121881 | + | 0          | 0          | -44.79009363 |
| chr8 | 36122054 | 36122054 | - | 2.41E-13   | 1.18E-11   | -39.07842268 |
| chr8 | 46497090 | 46497090 | - | 0.00039746 | 0.00410297 | -34.19715447 |
| chr8 | 46737652 | 46737652 | + | 7.97E-08   | 1.99E-06   | -31.70068027 |
| chr8 | 46756259 | 46756259 | + | 9.99E-07   | 2.06E-05   | -32.97764228 |
| chr8 | 47008219 | 47008219 | + | 7.08E-10   | 2.38E-08   | -49.22863924 |
| chr8 | 47008345 | 47008345 | - | 0          | 0          | -40.64652888 |
| chr8 | 47008363 | 47008363 | - | 1.46E-11   | 5.96E-10   | -29.94805881 |
| chr8 | 47008375 | 47008375 | - | 2.10E-08   | 5.76E-07   | -25.9038259  |
| chr8 | 47135002 | 47135002 | + | 0          | 0          | -33.18685312 |
| chr8 | 47234703 | 47234703 | - | 2.45E-07   | 5.65E-06   | -50.75060533 |
| chr8 | 47321629 | 47321629 | + | 0          | 0          | -27.22015646 |
| chr8 | 47408768 | 47408768 | + | 0          | 0          | -27.11459013 |
| chr8 | 47408978 | 47408978 | + | 0          | 0          | -36.66796419 |
| chr8 | 47409088 | 47409088 | - | 0          | 0          | -26.30129529 |
| chr8 | 47415136 | 47415136 | - | 1.42E-05   | 0.00022696 | -47.85714286 |
| chr8 | 48560579 | 48560579 | - | 5.01E-05   | 0.00069085 | 29.62962963  |

|      |          |          |   |            |            |              |
|------|----------|----------|---|------------|------------|--------------|
| chr8 | 48729128 | 48729128 | + | 4.41E-05   | 0.00061859 | -28.03544495 |
| chr8 | 50574641 | 50574641 | + | 4.11E-05   | 0.00058126 | -30.42986425 |
| chr8 | 57326149 | 57326149 | + | 0          | 0          | -39.04439401 |
| chr8 | 57326161 | 57326161 | + | 2.22E-16   | 1.43E-14   | -27.57822391 |
| chr8 | 57353348 | 57353348 | - | 4.51E-06   | 8.09E-05   | -34.64285714 |
| chr8 | 57600086 | 57600086 | - | 3.14E-08   | 8.38E-07   | -43.53846154 |
| chr8 | 57600100 | 57600100 | - | 3.74E-10   | 1.30E-08   | -43.52173913 |
| chr8 | 57600105 | 57600105 | - | 2.05E-07   | 4.79E-06   | -35.73232323 |
| chr8 | 57600114 | 57600114 | + | 0          | 0          | -33.94591852 |
| chr8 | 57600118 | 57600118 | + | 0          | 0          | -35.73712939 |
| chr8 | 57600125 | 57600125 | + | 0          | 0          | -31.75662498 |
| chr8 | 57600261 | 57600261 | - | 0          | 0          | -33.64718233 |
| chr8 | 57600270 | 57600270 | - | 0          | 0          | -28.26609371 |
| chr8 | 61226174 | 61226174 | + | 1.26E-06   | 2.54E-05   | -31.74530463 |
| chr8 | 61283786 | 61283786 | - | 0          | 0          | -28.92382767 |
| chr8 | 61283802 | 61283802 | - | 0          | 0          | -25.40475819 |
| chr8 | 61585101 | 61585101 | - | 0          | 0          | -26.94091535 |
| chr8 | 61590110 | 61590110 | + | 5.74E-07   | 1.24E-05   | -27.82440714 |
| chr8 | 64362416 | 64362416 | + | 0          | 0          | -35.2575123  |
| chr8 | 64362422 | 64362422 | + | 0          | 0          | -32.20775131 |
| chr8 | 64362445 | 64362445 | + | 0          | 0          | -30.43961578 |
| chr8 | 64921982 | 64921982 | - | 5.61E-07   | 1.21E-05   | -32.27856481 |
| chr8 | 64942558 | 64942558 | + | 1.11E-16   | 7.26E-15   | -25.06045488 |
| chr8 | 64942590 | 64942590 | + | 1.67E-15   | 9.99E-14   | -26.0242416  |
| chr8 | 67974575 | 67974575 | + | 0          | 0          | -30.75828275 |
| chr8 | 67974596 | 67974596 | + | 0          | 0          | -25.33473132 |
| chr8 | 67974684 | 67974684 | - | 0          | 0          | -33.4288188  |
| chr8 | 67974694 | 67974694 | - | 0          | 0          | -31.38522378 |
| chr8 | 68276928 | 68276928 | + | 1.31E-11   | 5.37E-10   | -25.99925009 |
| chr8 | 68368503 | 68368503 | + | 8.55E-15   | 4.81E-13   | -33.79765215 |
| chr8 | 69122838 | 69122838 | + | 0          | 0          | -30.51291376 |
| chr8 | 69122881 | 69122881 | + | 0          | 0          | -34.65044309 |
| chr8 | 69122882 | 69122882 | - | 0          | 0          | -31.28176558 |
| chr8 | 69880848 | 69880848 | - | 0.00047258 | 0.00474437 | 26.31118881  |
| chr8 | 69883096 | 69883096 | + | 0          | 0          | -27.52       |
| chr8 | 69884378 | 69884378 | - | 0.00066949 | 0.00634502 | -26.36363636 |
| chr8 | 70079477 | 70079477 | - | 1.47E-06   | 2.93E-05   | -25.00992808 |
| chr8 | 70112851 | 70112851 | - | 0.00019223 | 0.00221505 | 27.55731922  |
| chr8 | 70150473 | 70150473 | + | 0          | 0          | -31.11325114 |
| chr8 | 70150481 | 70150481 | + | 0          | 0          | -31.95661243 |
| chr8 | 70150482 | 70150482 | - | 0          | 0          | -34.20872596 |

|      |          |          |   |            |            |              |
|------|----------|----------|---|------------|------------|--------------|
| chr8 | 70150490 | 70150490 | + | 0          | 0          | -26.18163878 |
| chr8 | 70150491 | 70150491 | - | 0          | 0          | -29.29289555 |
| chr8 | 70165822 | 70165822 | + | 0.00012153 | 0.001492   | -35.66997519 |
| chr8 | 70166181 | 70166181 | + | 0          | 0          | -25.79120712 |
| chr8 | 70166182 | 70166182 | - | 0          | 0          | -25.80283139 |
| chr8 | 70166191 | 70166191 | + | 0          | 0          | -25.39836469 |
| chr8 | 70316311 | 70316311 | + | 5.83E-13   | 2.75E-11   | -26.9966318  |
| chr8 | 70330919 | 70330919 | - | 0.00110516 | 0.00958095 | -25.36585366 |
| chr8 | 70332180 | 70332180 | + | 0          | 0          | -37.08989805 |
| chr8 | 70332189 | 70332189 | + | 0          | 0          | -53.14685315 |
| chr8 | 70332190 | 70332190 | - | 0          | 0          | -50.21472027 |
| chr8 | 70332208 | 70332208 | - | 0          | 0          | -51.2865807  |
| chr8 | 70332214 | 70332214 | - | 0          | 0          | -35.43523436 |
| chr8 | 70332217 | 70332217 | - | 0          | 0          | -50.05911017 |
| chr8 | 70332225 | 70332225 | - | 0          | 0          | -48.97668255 |
| chr8 | 70337119 | 70337119 | - | 2.54E-05   | 0.00037981 | -32.08807521 |
| chr8 | 70487366 | 70487366 | + | 6.54E-13   | 3.08E-11   | -33.56203958 |
| chr8 | 70487376 | 70487376 | + | 2.60E-11   | 1.03E-09   | -41.49287322 |
| chr8 | 70487418 | 70487418 | - | 0          | 0          | -26.11742278 |
| chr8 | 70487423 | 70487423 | - | 0          | 0          | -27.20635187 |
| chr8 | 70487443 | 70487443 | + | 1.11E-12   | 5.09E-11   | -26.98393795 |
| chr8 | 70487444 | 70487444 | - | 0          | 0          | -27.2068862  |
| chr8 | 70487447 | 70487447 | + | 0          | 0          | -34.56554195 |
| chr8 | 70487448 | 70487448 | - | 0          | 0          | -29.9744898  |
| chr8 | 70487476 | 70487476 | - | 4.69E-13   | 2.24E-11   | -30.88930348 |
| chr8 | 70488072 | 70488072 | + | 0          | 0          | -25.49261867 |
| chr8 | 70488073 | 70488073 | - | 0          | 0          | -27.11989002 |
| chr8 | 70488074 | 70488074 | + | 0          | 0          | -30.90644336 |
| chr8 | 70488075 | 70488075 | - | 0          | 0          | -32.85971416 |
| chr8 | 70505894 | 70505894 | - | 0          | 0          | -26.51635323 |
| chr8 | 70505908 | 70505908 | - | 0          | 0          | -29.47887758 |
| chr8 | 70593811 | 70593811 | + | 2.41E-06   | 4.59E-05   | -29.45121951 |
| chr8 | 70596852 | 70596852 | - | 0          | 0          | -27.96373664 |
| chr8 | 70597880 | 70597880 | + | 0          | 0          | -30.68487181 |
| chr8 | 70598454 | 70598454 | + | 0          | 0          | -46.5116731  |
| chr8 | 70598474 | 70598474 | + | 0          | 0          | -45.17640877 |
| chr8 | 70598475 | 70598475 | - | 0          | 0          | -26.50033003 |
| chr8 | 70598489 | 70598489 | + | 0          | 0          | -49.05405405 |
| chr8 | 70598490 | 70598490 | - | 0          | 0          | -33.00990099 |
| chr8 | 70598495 | 70598495 | + | 0          | 0          | -47.88323347 |
| chr8 | 70598502 | 70598502 | + | 0          | 0          | -46.033759   |

|      |          |          |   |            |            |              |
|------|----------|----------|---|------------|------------|--------------|
| chr8 | 70598514 | 70598514 | + | 0          | 0          | -43.51873191 |
| chr8 | 70598524 | 70598524 | + | 0          | 0          | -50.31385603 |
| chr8 | 70598548 | 70598548 | + | 0          | 0          | -51.29035668 |
| chr8 | 70598549 | 70598549 | - | 0          | 0          | -53.10608415 |
| chr8 | 70598554 | 70598554 | + | 0          | 0          | -54.43098491 |
| chr8 | 70598555 | 70598555 | - | 0          | 0          | -56.26933354 |
| chr8 | 70598571 | 70598571 | - | 0          | 0          | -50.04981703 |
| chr8 | 70598597 | 70598597 | + | 0          | 0          | -45.01023245 |
| chr8 | 70598598 | 70598598 | - | 0          | 0          | -50.8443221  |
| chr8 | 70598608 | 70598608 | + | 0          | 0          | -46.62508663 |
| chr8 | 70598609 | 70598609 | - | 0          | 0          | -50.06177415 |
| chr8 | 70598612 | 70598612 | + | 0          | 0          | -42.88429027 |
| chr8 | 70598613 | 70598613 | - | 0          | 0          | -49.15797317 |
| chr8 | 70598621 | 70598621 | + | 0          | 0          | -47.3787341  |
| chr8 | 70598622 | 70598622 | - | 0          | 0          | -49.54166667 |
| chr8 | 70598635 | 70598635 | + | 0          | 0          | -47.15439883 |
| chr8 | 70598636 | 70598636 | - | 0          | 0          | -47.49634894 |
| chr8 | 70598644 | 70598644 | + | 0          | 0          | -46.29545357 |
| chr8 | 70598645 | 70598645 | - | 0          | 0          | -49.92122622 |
| chr8 | 70598649 | 70598649 | + | 0          | 0          | -52.09849874 |
| chr8 | 70598650 | 70598650 | - | 0          | 0          | -50.21478782 |
| chr8 | 70598653 | 70598653 | + | 0          | 0          | -42.71418795 |
| chr8 | 70598654 | 70598654 | - | 0          | 0          | -42.89023521 |
| chr8 | 70598660 | 70598660 | + | 0          | 0          | -40.02246939 |
| chr8 | 70598661 | 70598661 | - | 0          | 0          | -37.22913538 |
| chr8 | 70598671 | 70598671 | + | 0          | 0          | -34.51910408 |
| chr8 | 70598672 | 70598672 | - | 0          | 0          | -27.48384439 |
| chr8 | 70598688 | 70598688 | + | 2.95E-14   | 1.58E-12   | -30.46991656 |
| chr8 | 70598689 | 70598689 | - | 0          | 0          | -34.50899032 |
| chr8 | 70598694 | 70598694 | - | 1.22E-15   | 7.41E-14   | -29.92900226 |
| chr8 | 70598701 | 70598701 | + | 2.00E-14   | 1.09E-12   | -25.21210407 |
| chr8 | 70598797 | 70598797 | - | 0          | 0          | -27.23573826 |
| chr8 | 70598825 | 70598825 | - | 3.00E-15   | 1.76E-13   | -29.43979933 |
| chr8 | 70617975 | 70617975 | + | 0          | 0          | -33.45601251 |
| chr8 | 70629537 | 70629537 | + | 0.00071086 | 0.00666518 | -27.48251748 |
| chr8 | 70629548 | 70629548 | + | 1.06E-05   | 0.00017424 | -36.60839161 |
| chr8 | 70629549 | 70629549 | - | 8.88E-08   | 2.20E-06   | -37.60801257 |
| chr8 | 70691721 | 70691721 | - | 0          | 0          | -36.62815017 |
| chr8 | 70691734 | 70691734 | - | 0          | 0          | -26.96596115 |
| chr8 | 70692370 | 70692370 | - | 0          | 0          | -26.62941432 |
| chr8 | 70694075 | 70694075 | - | 1.59E-05   | 0.00025004 | -28.30409357 |



|      |          |          |   |            |            |              |
|------|----------|----------|---|------------|------------|--------------|
| chr8 | 70722720 | 70722720 | + | 4.07E-07   | 9.00E-06   | -37.23484848 |
| chr8 | 70745301 | 70745301 | + | 2.39E-11   | 9.54E-10   | -28.74606438 |
| chr8 | 70745319 | 70745319 | + | 9.61E-13   | 4.44E-11   | -32.06322688 |
| chr8 | 70753647 | 70753647 | + | 1.49E-11   | 6.07E-10   | -29.1310663  |
| chr8 | 70796822 | 70796822 | - | 0          | 0          | -25.60334528 |
| chr8 | 70803747 | 70803747 | + | 9.55E-14   | 4.87E-12   | -31.42562584 |
| chr8 | 70816875 | 70816875 | - | 9.45E-08   | 2.33E-06   | -40.75581395 |
| chr8 | 70816888 | 70816888 | - | 0.00014207 | 0.001708   | -28.36206897 |
| chr8 | 70816894 | 70816894 | + | 0          | 0          | -39.85493884 |
| chr8 | 70816895 | 70816895 | - | 1.09E-07   | 2.66E-06   | -40.08136925 |
| chr8 | 70816904 | 70816904 | + | 0          | 0          | -40.24767114 |
| chr8 | 70816905 | 70816905 | - | 0          | 0          | -36.76333225 |
| chr8 | 70816909 | 70816909 | + | 0          | 0          | -35.196425   |
| chr8 | 70816910 | 70816910 | - | 0          | 0          | -45.47872913 |
| chr8 | 70816914 | 70816914 | + | 0          | 0          | -39.83318505 |
| chr8 | 70816915 | 70816915 | - | 0          | 0          | -41.70816194 |
| chr8 | 70816930 | 70816930 | + | 0          | 0          | -41.93362159 |
| chr8 | 70816938 | 70816938 | + | 0          | 0          | -35.91744513 |
| chr8 | 70816939 | 70816939 | - | 0          | 0          | -34.07865791 |
| chr8 | 70816945 | 70816945 | + | 0          | 0          | -37.40392036 |
| chr8 | 70816946 | 70816946 | - | 0          | 0          | -36.09717505 |
| chr8 | 70816956 | 70816956 | + | 0          | 0          | -31.00046653 |
| chr8 | 70816957 | 70816957 | - | 0          | 0          | -31.11253086 |
| chr8 | 70816959 | 70816959 | + | 0          | 0          | -29.15438283 |
| chr8 | 70816960 | 70816960 | - | 0          | 0          | -27.72727928 |
| chr8 | 70820414 | 70820414 | + | 0          | 0          | -43.23611051 |
| chr8 | 70820420 | 70820420 | + | 0          | 0          | -36.06642615 |
| chr8 | 70820546 | 70820546 | + | 0          | 0          | -37.47132395 |
| chr8 | 70820547 | 70820547 | - | 0          | 0          | -26.67374772 |
| chr8 | 70820563 | 70820563 | + | 0          | 0          | -40.23812287 |
| chr8 | 70820564 | 70820564 | - | 0          | 0          | -37.57487556 |
| chr8 | 70820580 | 70820580 | + | 0          | 0          | -38.84339066 |
| chr8 | 70820581 | 70820581 | - | 0          | 0          | -30.37689682 |
| chr8 | 70820615 | 70820615 | + | 0          | 0          | -32.1931664  |
| chr8 | 70820809 | 70820809 | - | 2.45E-10   | 8.72E-09   | -28.20454024 |
| chr8 | 70821037 | 70821037 | - | 3.33E-16   | 2.11E-14   | -36.38517164 |
| chr8 | 70869338 | 70869338 | + | 0.00011171 | 0.00138687 | -36.52715323 |
| chr8 | 70869358 | 70869358 | + | 1.14E-06   | 2.33E-05   | -45.25862069 |
| chr8 | 70869366 | 70869366 | + | 0.00042087 | 0.00430385 | -33.49152542 |
| chr8 | 70893069 | 70893069 | - | 0.00012481 | 0.00152661 | -25.971815   |
| chr8 | 70893139 | 70893139 | - | 0          | 0          | -32.74314538 |

|      |          |          |   |            |            |              |
|------|----------|----------|---|------------|------------|--------------|
| chr8 | 70893176 | 70893176 | + | 1.05E-08   | 3.02E-07   | -28.27996118 |
| chr8 | 70896372 | 70896372 | + | 0.0002087  | 0.00237613 | -44.19729207 |
| chr8 | 71289466 | 71289466 | + | 0.00057359 | 0.00558077 | -35.38812785 |
| chr8 | 71376513 | 71376513 | - | 0          | 0          | -25.23207609 |
| chr8 | 71481084 | 71481084 | + | 0          | 0          | -29.83425782 |
| chr8 | 71525537 | 71525537 | - | 0          | 0          | -45.7        |
| chr8 | 71525542 | 71525542 | - | 0          | 0          | -46.65518231 |
| chr8 | 71525573 | 71525573 | - | 0          | 0          | -45.96092155 |
| chr8 | 71525581 | 71525581 | + | 0          | 0          | -57.13329237 |
| chr8 | 71525582 | 71525582 | - | 0          | 0          | -45.83848507 |
| chr8 | 71525586 | 71525586 | + | 0          | 0          | -54.30827068 |
| chr8 | 71525589 | 71525589 | + | 0          | 0          | -36.4904816  |
| chr8 | 71525595 | 71525595 | + | 0          | 0          | -50.06602139 |
| chr8 | 71525628 | 71525628 | + | 0          | 0          | -48.95632627 |
| chr8 | 71525630 | 71525630 | + | 0          | 0          | -26.93613048 |
| chr8 | 71525650 | 71525650 | - | 0          | 0          | -43.10704058 |
| chr8 | 71525658 | 71525658 | - | 0          | 0          | -50.82889809 |
| chr8 | 71525675 | 71525675 | - | 0          | 0          | -25.65926617 |
| chr8 | 71525684 | 71525684 | - | 0          | 0          | -26.6083137  |
| chr8 | 71525689 | 71525689 | - | 0          | 0          | -38.49797663 |
| chr8 | 71526289 | 71526289 | + | 1.71E-10   | 6.18E-09   | -31.33570768 |
| chr8 | 71596325 | 71596325 | - | 2.19E-06   | 4.21E-05   | -28.82262997 |
| chr8 | 71660416 | 71660416 | + | 0          | 0          | -25.08456361 |
| chr8 | 71689982 | 71689982 | + | 0          | 0          | -47.23213274 |
| chr8 | 71690106 | 71690106 | - | 0          | 0          | -36.98233826 |
| chr8 | 71690135 | 71690135 | - | 0          | 0          | -46.0331299  |
| chr8 | 71700477 | 71700477 | - | 0          | 0          | -31.67765071 |
| chr8 | 71700521 | 71700521 | + | 0          | 0          | -33.57782814 |
| chr8 | 71700522 | 71700522 | - | 0          | 0          | -25.88252799 |
| chr8 | 71700530 | 71700530 | + | 0          | 0          | -31.09762108 |
| chr8 | 71700554 | 71700554 | + | 0          | 0          | -26.70256573 |
| chr8 | 71700567 | 71700567 | + | 0          | 0          | -37.76973155 |
| chr8 | 71700568 | 71700568 | - | 0          | 0          | -37.26977958 |
| chr8 | 71700611 | 71700611 | + | 0          | 0          | -35.62163314 |
| chr8 | 71700635 | 71700635 | + | 0          | 0          | -42.35923579 |
| chr8 | 71700737 | 71700737 | - | 0          | 0          | -50.005215   |
| chr8 | 71700768 | 71700768 | + | 3.75E-05   | 0.00053564 | -25.79899884 |
| chr8 | 71709784 | 71709784 | - | 7.91E-13   | 3.69E-11   | -34.54426942 |
| chr8 | 71709806 | 71709806 | - | 8.84E-09   | 2.56E-07   | -27.3698702  |
| chr8 | 71709817 | 71709817 | - | 1.72E-08   | 4.77E-07   | -26.23784262 |
| chr8 | 71709821 | 71709821 | - | 1.89E-15   | 1.13E-13   | -35.93411744 |

|      |          |          |   |            |            |              |
|------|----------|----------|---|------------|------------|--------------|
| chr8 | 71742098 | 71742098 | - | 1.10E-07   | 2.68E-06   | -25.37037037 |
| chr8 | 72134878 | 72134878 | + | 0.00029477 | 0.00318929 | -25.28237952 |
| chr8 | 72271269 | 72271269 | + | 0          | 0          | -54.93258118 |
| chr8 | 72271308 | 72271308 | + | 0          | 0          | -45.21084648 |
| chr8 | 72271376 | 72271376 | - | 0          | 0          | -50.14182463 |
| chr8 | 72320223 | 72320223 | - | 3.41E-08   | 9.04E-07   | -31.74641148 |
| chr8 | 72320231 | 72320231 | - | 9.09E-09   | 2.63E-07   | -30.97819612 |
| chr8 | 72320249 | 72320249 | - | 2.41E-09   | 7.55E-08   | -35.05717256 |
| chr8 | 72320677 | 72320677 | + | 0          | 0          | -27.02234813 |
| chr8 | 72741636 | 72741636 | - | 8.72E-13   | 4.05E-11   | -29.06483202 |
| chr8 | 73352316 | 73352316 | - | 3.40E-06   | 6.27E-05   | -26.70807453 |
| chr8 | 73667690 | 73667690 | + | 0          | 0          | -28.40519778 |
| chr8 | 75223582 | 75223582 | - | 0.00063844 | 0.00609932 | -26.36363636 |
| chr8 | 77609908 | 77609908 | - | 1.31E-06   | 2.64E-05   | -27.81271053 |
| chr8 | 78097113 | 78097113 | + | 2.03E-10   | 7.28E-09   | -53.76940133 |
| chr8 | 78097114 | 78097114 | - | 0          | 0          | -25.4345182  |
| chr8 | 78097124 | 78097124 | + | 3.29E-05   | 0.00047697 | -35.56818182 |
| chr8 | 78097375 | 78097375 | - | 0.00026284 | 0.00289438 | -25.95427964 |
| chr8 | 78097401 | 78097401 | - | 0.00014702 | 0.00175956 | -25.91431557 |
| chr8 | 79382872 | 79382872 | - | 0          | 0          | -25.8426312  |
| chr8 | 79382910 | 79382910 | + | 0          | 0          | -33.69754841 |
| chr8 | 79382984 | 79382984 | - | 0          | 0          | -39.66160702 |
| chr8 | 80055895 | 80055895 | - | 4.79E-06   | 8.54E-05   | -37.26415094 |
| chr8 | 80314480 | 80314480 | + | 0          | 0          | -36.86114841 |
| chr8 | 80314481 | 80314481 | - | 0          | 0          | -29.86604361 |
| chr8 | 80921794 | 80921794 | - | 1.11E-16   | 7.26E-15   | -27.17775083 |
| chr8 | 83390560 | 83390560 | - | 9.96E-10   | 3.29E-08   | -25.69751866 |
| chr8 | 83570884 | 83570884 | - | 0          | 0          | -27.24068389 |
| chr8 | 83574777 | 83574777 | + | 0.00017798 | 0.00207378 | -28.35526316 |
| chr8 | 83660942 | 83660942 | + | 1.11E-15   | 6.76E-14   | -25.959761   |
| chr8 | 83661028 | 83661028 | - | 0          | 0          | -30.25364224 |
| chr8 | 83661062 | 83661062 | + | 0          | 0          | -26.36640515 |
| chr8 | 83661166 | 83661166 | + | 8.42E-13   | 3.91E-11   | -32.13804714 |
| chr8 | 83661358 | 83661358 | - | 0          | 0          | -38.62217575 |
| chr8 | 83661372 | 83661372 | - | 0          | 0          | -45.74060244 |
| chr8 | 83661388 | 83661388 | - | 4.44E-16   | 2.79E-14   | -33.17454387 |
| chr8 | 83661397 | 83661397 | - | 2.18E-10   | 7.81E-09   | -26.47949527 |
| chr8 | 83669233 | 83669233 | + | 7.81E-10   | 2.61E-08   | -67.11229947 |
| chr8 | 83721823 | 83721823 | + | 0          | 0          | -32.51805913 |
| chr8 | 83721866 | 83721866 | + | 0          | 0          | -30.52280218 |
| chr8 | 83741628 | 83741628 | + | 0          | 0          | -31.71450873 |

|      |          |          |   |          |          |              |
|------|----------|----------|---|----------|----------|--------------|
| chr8 | 83741706 | 83741706 | + | 1.14E-13 | 5.77E-12 | -29.18440676 |
| chr8 | 83901509 | 83901509 | - | 0        | 0        | -26.76143943 |
| chr8 | 83901809 | 83901809 | + | 2.66E-07 | 6.09E-06 | -44.36821041 |
| chr8 | 83916199 | 83916199 | + | 0        | 0        | -32.9529031  |
| chr8 | 83916272 | 83916272 | - | 0        | 0        | -31.6966456  |
| chr8 | 84012846 | 84012846 | - | 0        | 0        | -34.28118623 |
| chr8 | 84012972 | 84012972 | + | 0        | 0        | -26.76251717 |
| chr8 | 84012985 | 84012985 | + | 0        | 0        | -36.48381085 |
| chr8 | 84013055 | 84013055 | - | 0        | 0        | -35.98204286 |
| chr8 | 84013073 | 84013073 | - | 0        | 0        | -29.90452972 |
| chr8 | 84021087 | 84021087 | + | 0        | 0        | -28.07817957 |
| chr8 | 84021206 | 84021206 | - | 0        | 0        | -35.30287329 |
| chr8 | 84021210 | 84021210 | - | 0        | 0        | -29.82849155 |
| chr8 | 84021252 | 84021252 | + | 0        | 0        | -28.98385773 |
| chr8 | 84021253 | 84021253 | - | 0        | 0        | -34.93886744 |
| chr8 | 84021255 | 84021255 | + | 0        | 0        | -40.95820143 |
| chr8 | 84021256 | 84021256 | - | 0        | 0        | -41.02094154 |
| chr8 | 84021263 | 84021263 | + | 0        | 0        | -34.3891758  |
| chr8 | 84021264 | 84021264 | - | 0        | 0        | -38.75391575 |
| chr8 | 84021291 | 84021291 | + | 0        | 0        | -41.60756501 |
| chr8 | 84021292 | 84021292 | - | 0        | 0        | -38.04535574 |
| chr8 | 84021296 | 84021296 | + | 0        | 0        | -41.78076651 |
| chr8 | 84021297 | 84021297 | - | 0        | 0        | -43.73133742 |
| chr8 | 84021305 | 84021305 | + | 0        | 0        | -33.19986543 |
| chr8 | 84021306 | 84021306 | - | 0        | 0        | -33.1952976  |
| chr8 | 84021343 | 84021343 | + | 0        | 0        | -35.2447409  |
| chr8 | 84021344 | 84021344 | - | 0        | 0        | -38.85557234 |
| chr8 | 84021371 | 84021371 | + | 0        | 0        | -28.27545362 |
| chr8 | 84021385 | 84021385 | + | 0        | 0        | -35.94395872 |
| chr8 | 84021417 | 84021417 | + | 0        | 0        | -33.35383387 |
| chr8 | 84021516 | 84021516 | + | 6.06E-13 | 2.86E-11 | -29.60192455 |
| chr8 | 84021528 | 84021528 | + | 0        | 0        | -36.13039648 |
| chr8 | 84021587 | 84021587 | - | 0        | 0        | -29.51109372 |
| chr8 | 84044799 | 84044799 | + | 0        | 0        | -40.59843474 |
| chr8 | 84044802 | 84044802 | + | 0        | 0        | -52.11567732 |
| chr8 | 84044808 | 84044808 | + | 0        | 0        | -50.40286506 |
| chr8 | 84044834 | 84044834 | + | 0        | 0        | -38.89995874 |
| chr8 | 84044835 | 84044835 | - | 0        | 0        | -41.02855478 |
| chr8 | 84044838 | 84044838 | + | 0        | 0        | -27.31016204 |
| chr8 | 84044839 | 84044839 | - | 0        | 0        | -32.13164058 |
| chr8 | 84044851 | 84044851 | - | 0        | 0        | -26.22216893 |

|      |          |          |   |            |            |              |
|------|----------|----------|---|------------|------------|--------------|
| chr8 | 84044855 | 84044855 | - | 0          | 0          | -27.78976161 |
| chr8 | 84044870 | 84044870 | - | 0          | 0          | -35.13592751 |
| chr8 | 84044880 | 84044880 | - | 0          | 0          | -30.04517432 |
| chr8 | 84105426 | 84105426 | - | 0          | 0          | -27.44689427 |
| chr8 | 84180144 | 84180144 | + | 0          | 0          | -32.04013701 |
| chr8 | 84180145 | 84180145 | - | 2.60E-12   | 1.15E-10   | -27.33521059 |
| chr8 | 84180182 | 84180182 | - | 0          | 0          | -39.78362989 |
| chr8 | 84659571 | 84659571 | + | 0.00010397 | 0.00130438 | -43.05555556 |
| chr8 | 84707982 | 84707982 | + | 0          | 0          | -41.68628261 |
| chr8 | 84708072 | 84708072 | + | 0          | 0          | -34.80667706 |
| chr8 | 84708176 | 84708176 | - | 1.83E-06   | 3.58E-05   | -53.61111111 |
| chr8 | 84708182 | 84708182 | + | 0          | 0          | -29.5678942  |
| chr8 | 84708183 | 84708183 | - | 8.34E-06   | 0.00014066 | -48.27272727 |
| chr8 | 84708213 | 84708213 | + | 0          | 0          | -30.75793008 |
| chr8 | 84708254 | 84708254 | - | 0          | 0          | -43.74385063 |
| chr8 | 84708289 | 84708289 | - | 0          | 0          | -53.78268889 |
| chr8 | 84713804 | 84713804 | - | 2.75E-13   | 1.34E-11   | -31.49056604 |
| chr8 | 84721648 | 84721648 | + | 0          | 0          | -35.21981939 |
| chr8 | 84721661 | 84721661 | + | 0          | 0          | -40.7272706  |
| chr8 | 84721666 | 84721666 | + | 0          | 0          | -48.5818199  |
| chr8 | 84722060 | 84722060 | + | 0          | 0          | -39.59607649 |
| chr8 | 84722061 | 84722061 | - | 2.55E-06   | 4.83E-05   | -39.26406926 |
| chr8 | 84722070 | 84722070 | + | 0          | 0          | -29.9382083  |
| chr8 | 84736150 | 84736150 | + | 0          | 0          | -31.65482381 |
| chr8 | 84736153 | 84736153 | + | 0          | 0          | -37.8440448  |
| chr8 | 84736195 | 84736195 | - | 0          | 0          | -44.52744765 |
| chr8 | 84742583 | 84742583 | + | 1.29E-10   | 4.75E-09   | -25.90830778 |
| chr8 | 84745442 | 84745442 | - | 0          | 0          | -25.00984802 |
| chr8 | 84745458 | 84745458 | + | 0          | 0          | -31.37446286 |
| chr8 | 84745484 | 84745484 | + | 0          | 0          | -34.2260769  |
| chr8 | 84745659 | 84745659 | - | 0          | 0          | -34.96712282 |
| chr8 | 84779521 | 84779521 | + | 2.22E-05   | 0.00033763 | -35.38722442 |
| chr8 | 84779966 | 84779966 | - | 0          | 0          | -29.4454372  |
| chr8 | 84783090 | 84783090 | - | 0          | 0          | -30.52899993 |
| chr8 | 84784318 | 84784318 | + | 0          | 0          | -31.99035813 |
| chr8 | 84784345 | 84784345 | + | 0          | 0          | -42.32343419 |
| chr8 | 84784346 | 84784346 | - | 0          | 0          | -48.51994049 |
| chr8 | 84784359 | 84784359 | - | 0          | 0          | -25.85830515 |
| chr8 | 84784406 | 84784406 | + | 5.90E-05   | 0.00079812 | -35.12931034 |
| chr8 | 84784421 | 84784421 | + | 1.19E-05   | 0.00019358 | -40.07936508 |
| chr8 | 84784423 | 84784423 | + | 2.45E-06   | 4.65E-05   | -35.28693529 |

|      |          |          |   |          |          |              |
|------|----------|----------|---|----------|----------|--------------|
| chr8 | 84784436 | 84784436 | + | 2.89E-07 | 6.58E-06 | -47.5        |
| chr8 | 84784441 | 84784441 | + | 3.68E-06 | 6.73E-05 | -30.9375     |
| chr8 | 84784480 | 84784480 | + | 0        | 0        | -30.47544192 |
| chr8 | 84784484 | 84784484 | + | 0        | 0        | -26.03896104 |
| chr8 | 84784635 | 84784635 | - | 0        | 0        | -36.70256906 |
| chr8 | 84784775 | 84784775 | - | 0        | 0        | -33.02842583 |
| chr8 | 84784777 | 84784777 | - | 0        | 0        | -35.2205956  |
| chr8 | 84784798 | 84784798 | - | 0        | 0        | -30.10263323 |
| chr8 | 84784808 | 84784808 | - | 0        | 0        | -35.88533156 |
| chr8 | 84784825 | 84784825 | + | 0        | 0        | -49.81132075 |
| chr8 | 84784826 | 84784826 | - | 7.15E-08 | 1.80E-06 | -33.79637619 |
| chr8 | 84784834 | 84784834 | + | 3.77E-15 | 2.20E-13 | -31.48550725 |
| chr8 | 84784848 | 84784848 | + | 0        | 0        | -35.09749304 |
| chr8 | 84784854 | 84784854 | + | 0        | 0        | -34.10026188 |
| chr8 | 84784877 | 84784877 | + | 0        | 0        | -40.30566208 |
| chr8 | 84784986 | 84784986 | - | 0        | 0        | -35.72027431 |
| chr8 | 84785015 | 84785015 | - | 0        | 0        | -35.41865045 |
| chr8 | 84785020 | 84785020 | + | 0        | 0        | -27.86383239 |
| chr8 | 84785021 | 84785021 | - | 0        | 0        | -42.397796   |
| chr8 | 84785031 | 84785031 | + | 0        | 0        | -48.84406365 |
| chr8 | 84785032 | 84785032 | - | 0        | 0        | -52.76598075 |
| chr8 | 84785040 | 84785040 | + | 0        | 0        | -34.01942961 |
| chr8 | 84785041 | 84785041 | - | 0        | 0        | -38.76794065 |
| chr8 | 84785096 | 84785096 | + | 0        | 0        | -59.72902942 |
| chr8 | 84785230 | 84785230 | - | 0        | 0        | -58.8832391  |
| chr8 | 84785254 | 84785254 | + | 0        | 0        | -60.03417478 |
| chr8 | 84785255 | 84785255 | - | 0        | 0        | -59.67882819 |
| chr8 | 84785270 | 84785270 | + | 0        | 0        | -35.45950295 |
| chr8 | 84785286 | 84785286 | + | 0        | 0        | -57.16724114 |
| chr8 | 84785289 | 84785289 | + | 0        | 0        | -45.16657444 |
| chr8 | 84785308 | 84785308 | - | 0        | 0        | -57.84202359 |
| chr8 | 84785318 | 84785318 | - | 0        | 0        | -50.13335785 |
| chr8 | 84785320 | 84785320 | - | 0        | 0        | -38.13422183 |
| chr8 | 84785348 | 84785348 | - | 0        | 0        | -55.70170687 |
| chr8 | 84785449 | 84785449 | - | 0        | 0        | -62.31233822 |
| chr8 | 84785476 | 84785476 | + | 0        | 0        | -60.54021216 |
| chr8 | 84785477 | 84785477 | - | 0        | 0        | -67.70226986 |
| chr8 | 84785510 | 84785510 | + | 0        | 0        | -59.3146441  |
| chr8 | 84785523 | 84785523 | + | 0        | 0        | -50.24461738 |
| chr8 | 84785556 | 84785556 | - | 0        | 0        | -56.07051827 |
| chr8 | 84785567 | 84785567 | - | 0        | 0        | -65.81165503 |

|      |          |          |   |            |            |              |
|------|----------|----------|---|------------|------------|--------------|
| chr8 | 84785590 | 84785590 | - | 0          | 0          | -48.17715883 |
| chr8 | 84785603 | 84785603 | - | 0          | 0          | -51.30285152 |
| chr8 | 84786438 | 84786438 | + | 0          | 0          | -51.55740766 |
| chr8 | 84786485 | 84786485 | + | 0          | 0          | -49.03113503 |
| chr8 | 84786532 | 84786532 | - | 0          | 0          | -51.22986245 |
| chr8 | 84786556 | 84786556 | - | 0          | 0          | -56.93058076 |
| chr8 | 84786582 | 84786582 | - | 0          | 0          | -57.85621484 |
| chr8 | 84786591 | 84786591 | + | 0          | 0          | -58.73902476 |
| chr8 | 84786627 | 84786627 | + | 0          | 0          | -54.09792595 |
| chr8 | 84786713 | 84786713 | - | 0          | 0          | -61.40189956 |
| chr8 | 84872988 | 84872988 | - | 0          | 0          | -30.94026158 |
| chr8 | 84912432 | 84912432 | - | 1.54E-13   | 7.72E-12   | -25.02670856 |
| chr8 | 84912463 | 84912463 | + | 0          | 0          | -37.43045366 |
| chr8 | 84912539 | 84912539 | - | 0          | 0          | -30.19050929 |
| chr8 | 84912574 | 84912574 | + | 0          | 0          | -25.21462706 |
| chr8 | 84912576 | 84912576 | + | 0          | 0          | -29.81081081 |
| chr8 | 84912578 | 84912578 | + | 0          | 0          | -27.25769394 |
| chr8 | 84912696 | 84912696 | - | 0          | 0          | -38.31475324 |
| chr8 | 84912705 | 84912705 | - | 0          | 0          | -44.99178982 |
| chr8 | 84912708 | 84912708 | - | 0          | 0          | -40.24751858 |
| chr8 | 84912715 | 84912715 | - | 0          | 0          | -49.13502502 |
| chr8 | 84912723 | 84912723 | - | 0          | 0          | -25.18776022 |
| chr8 | 84918147 | 84918147 | + | 0          | 0          | -27.16955316 |
| chr8 | 84984800 | 84984800 | - | 5.85E-07   | 1.26E-05   | -61.31221719 |
| chr8 | 84984805 | 84984805 | - | 0.00010689 | 0.00133545 | -49.65034965 |
| chr8 | 84984813 | 84984813 | + | 0          | 0          | -46.84368542 |
| chr8 | 84984821 | 84984821 | + | 0          | 0          | -42.17778036 |
| chr8 | 84984839 | 84984839 | + | 0          | 0          | -52.01896456 |
| chr8 | 84984851 | 84984851 | + | 0          | 0          | -37.5915619  |
| chr8 | 84984956 | 84984956 | - | 2.69E-13   | 1.31E-11   | -28.92178712 |
| chr8 | 86578565 | 86578565 | + | 0.00027254 | 0.00298461 | -25.71428571 |
| chr8 | 86809408 | 86809408 | + | 1.48E-14   | 8.13E-13   | -29.49561404 |
| chr8 | 86882852 | 86882852 | - | 0.00037376 | 0.00389796 | -34.72527473 |
| chr8 | 87471851 | 87471851 | + | 0.00011423 | 0.00141348 | -27.55102041 |
| chr8 | 87661906 | 87661906 | - | 6.16E-06   | 0.00010705 | -29.40489173 |
| chr8 | 87661940 | 87661940 | - | 7.66E-09   | 2.24E-07   | -37.72551546 |
| chr8 | 87691276 | 87691276 | + | 6.59E-05   | 0.00087797 | -25.96585804 |
| chr8 | 87875619 | 87875619 | - | 3.70E-05   | 0.0005287  | -26.06674166 |
| chr8 | 88273022 | 88273022 | - | 2.18E-11   | 8.75E-10   | -25.18161063 |
| chr8 | 88275196 | 88275196 | - | 0.0004718  | 0.00473793 | -26.78082192 |
| chr8 | 88291539 | 88291539 | + | 7.77E-16   | 4.79E-14   | -35.22247458 |

|      |          |          |   |          |            |              |
|------|----------|----------|---|----------|------------|--------------|
| chr8 | 88431471 | 88431471 | - | 4.70E-05 | 0.00065342 | -37.75388292 |
| chr8 | 88437794 | 88437794 | - | 0        | 0          | -34.0288775  |
| chr8 | 88627233 | 88627233 | + | 0        | 0          | -26.56000276 |
| chr8 | 88627252 | 88627252 | + | 0        | 0          | -34.51117724 |
| chr8 | 88627255 | 88627255 | + | 0        | 0          | -33.37534236 |
| chr8 | 88627257 | 88627257 | + | 0        | 0          | -33.78363106 |
| chr8 | 88627332 | 88627332 | - | 0        | 0          | -29.82395493 |
| chr8 | 88627360 | 88627360 | - | 0        | 0          | -25.92703349 |
| chr8 | 88627378 | 88627378 | - | 0        | 0          | -26.61713175 |
| chr8 | 88627381 | 88627381 | + | 0        | 0          | -34.53246545 |
| chr8 | 88627382 | 88627382 | - | 0        | 0          | -29.7687868  |
| chr8 | 88627385 | 88627385 | + | 0        | 0          | -38.94037197 |
| chr8 | 88627389 | 88627389 | + | 0        | 0          | -44.37204522 |
| chr8 | 88627395 | 88627395 | + | 0        | 0          | -32.27488883 |
| chr8 | 88627397 | 88627397 | + | 0        | 0          | -41.53554115 |
| chr8 | 88627407 | 88627407 | + | 0        | 0          | -41.92918897 |
| chr8 | 88627411 | 88627411 | + | 0        | 0          | -38.99193594 |
| chr8 | 88627413 | 88627413 | + | 0        | 0          | -40.07737768 |
| chr8 | 88627416 | 88627416 | + | 0        | 0          | -38.74711006 |
| chr8 | 88627423 | 88627423 | + | 0        | 0          | -42.241215   |
| chr8 | 88627425 | 88627425 | + | 0        | 0          | -43.96967913 |
| chr8 | 88627431 | 88627431 | + | 0        | 0          | -34.0969051  |
| chr8 | 88627472 | 88627472 | - | 0        | 0          | -40.56162196 |
| chr8 | 88627478 | 88627478 | - | 0        | 0          | -37.95459672 |
| chr8 | 88627480 | 88627480 | - | 0        | 0          | -37.45649812 |
| chr8 | 88627482 | 88627482 | - | 0        | 0          | -40.13540407 |
| chr8 | 88627495 | 88627495 | - | 0        | 0          | -40.8383458  |
| chr8 | 88627499 | 88627499 | - | 0        | 0          | -39.38991112 |
| chr8 | 88627501 | 88627501 | - | 0        | 0          | -35.82558285 |
| chr8 | 88627503 | 88627503 | - | 0        | 0          | -42.27579197 |
| chr8 | 88627505 | 88627505 | - | 0        | 0          | -42.1178785  |
| chr8 | 88627507 | 88627507 | - | 0        | 0          | -41.15454197 |
| chr8 | 88627515 | 88627515 | + | 0        | 0          | -40.27370382 |
| chr8 | 88627516 | 88627516 | - | 0        | 0          | -39.7313552  |
| chr8 | 88627518 | 88627518 | + | 0        | 0          | -31.74421988 |
| chr8 | 88627520 | 88627520 | + | 0        | 0          | -34.98229038 |
| chr8 | 88627530 | 88627530 | + | 0        | 0          | -30.98932147 |
| chr8 | 88627539 | 88627539 | + | 0        | 0          | -37.92931124 |
| chr8 | 88627541 | 88627541 | + | 0        | 0          | -42.11856641 |
| chr8 | 88627548 | 88627548 | + | 0        | 0          | -33.28654971 |
| chr8 | 88627553 | 88627553 | + | 0        | 0          | -35.66680536 |



|      |          |          |   |          |          |              |
|------|----------|----------|---|----------|----------|--------------|
| chr8 | 88627555 | 88627555 | + | 0        | 0        | -36.16678112 |
| chr8 | 88627587 | 88627587 | - | 9.99E-16 | 6.10E-14 | -27.32402732 |
| chr8 | 88627591 | 88627591 | - | 0        | 0        | -32.41125416 |
| chr8 | 88627594 | 88627594 | - | 0        | 0        | -38.28133863 |
| chr8 | 88627596 | 88627596 | - | 0        | 0        | -32.79126549 |
| chr8 | 88627600 | 88627600 | - | 0        | 0        | -40.11428571 |
| chr8 | 88627603 | 88627603 | - | 0        | 0        | -35.10898231 |
| chr8 | 88627614 | 88627614 | - | 0        | 0        | -38.09958642 |
| chr8 | 88627624 | 88627624 | - | 0        | 0        | -40.25503563 |
| chr8 | 88627626 | 88627626 | - | 0        | 0        | -37.97600371 |
| chr8 | 88627634 | 88627634 | + | 0        | 0        | -39.09060215 |
| chr8 | 88627635 | 88627635 | - | 0        | 0        | -38.66462645 |
| chr8 | 88627637 | 88627637 | + | 0        | 0        | -35.13254806 |
| chr8 | 88627638 | 88627638 | - | 0        | 0        | -44.08628712 |
| chr8 | 88627640 | 88627640 | + | 0        | 0        | -33.8734768  |
| chr8 | 88627641 | 88627641 | - | 0        | 0        | -35.23391813 |
| chr8 | 88627644 | 88627644 | + | 0        | 0        | -34.67252469 |
| chr8 | 88627645 | 88627645 | - | 0        | 0        | -37.96332423 |
| chr8 | 88627656 | 88627656 | + | 0        | 0        | -31.58284312 |
| chr8 | 88627657 | 88627657 | - | 0        | 0        | -37.96968433 |
| chr8 | 88627660 | 88627660 | + | 0        | 0        | -34.14071511 |
| chr8 | 88627661 | 88627661 | - | 0        | 0        | -41.79084729 |
| chr8 | 88627671 | 88627671 | + | 0        | 0        | -35.77166427 |
| chr8 | 88627672 | 88627672 | - | 0        | 0        | -43.69842754 |
| chr8 | 88627679 | 88627679 | + | 0        | 0        | -34.13992856 |
| chr8 | 88627680 | 88627680 | - | 0        | 0        | -47.62360447 |
| chr8 | 88627685 | 88627685 | + | 0        | 0        | -31.60127387 |
| chr8 | 88627686 | 88627686 | - | 0        | 0        | -42.56428952 |
| chr8 | 88627687 | 88627687 | + | 0        | 0        | -25.78869142 |
| chr8 | 88627688 | 88627688 | - | 0        | 0        | -29.78100703 |
| chr8 | 88627693 | 88627693 | + | 0        | 0        | -30.32663862 |
| chr8 | 88627694 | 88627694 | - | 0        | 0        | -41.06767313 |
| chr8 | 88627698 | 88627698 | + | 0        | 0        | -36.36072973 |
| chr8 | 88627699 | 88627699 | - | 0        | 0        | -46.36918426 |
| chr8 | 88627711 | 88627711 | + | 0        | 0        | -38.08966568 |
| chr8 | 88627712 | 88627712 | - | 0        | 0        | -40.34536892 |
| chr8 | 88627716 | 88627716 | + | 0        | 0        | -35.3809117  |
| chr8 | 88627721 | 88627721 | + | 0        | 0        | -39.45304335 |
| chr8 | 88627749 | 88627749 | + | 0        | 0        | -39.4155368  |
| chr8 | 88627756 | 88627756 | + | 0        | 0        | -37.87740905 |
| chr8 | 88627757 | 88627757 | - | 0        | 0        | -30.7803208  |

|      |          |          |   |            |            |              |
|------|----------|----------|---|------------|------------|--------------|
| chr8 | 88627764 | 88627764 | - | 0          | 0          | -28.48541384 |
| chr8 | 88627767 | 88627767 | - | 0          | 0          | -35.78144983 |
| chr8 | 88627778 | 88627778 | - | 0          | 0          | -26.14973673 |
| chr8 | 88627786 | 88627786 | - | 0          | 0          | -36.39422659 |
| chr8 | 88627792 | 88627792 | - | 0          | 0          | -40.18812785 |
| chr8 | 88627800 | 88627800 | + | 0          | 0          | -39.12147961 |
| chr8 | 88627801 | 88627801 | - | 0          | 0          | -36.17526399 |
| chr8 | 88627815 | 88627815 | + | 0          | 0          | -36.61845928 |
| chr8 | 88627816 | 88627816 | - | 0          | 0          | -31.67591712 |
| chr8 | 90348864 | 90348864 | + | 0          | 0          | -31.09718042 |
| chr8 | 90348865 | 90348865 | - | 0          | 0          | -28.98492389 |
| chr8 | 90827985 | 90827985 | + | 1.79E-08   | 4.96E-07   | -36.94117647 |
| chr8 | 90828015 | 90828015 | + | 3.12E-09   | 9.62E-08   | -26.45098039 |
| chr8 | 90907574 | 90907574 | + | 5.90E-06   | 0.00010313 | -26.32676582 |
| chr8 | 90907602 | 90907602 | + | 2.57E-11   | 1.02E-09   | -39.76466796 |
| chr8 | 91176446 | 91176446 | - | 0          | 0          | -26.46150387 |
| chr8 | 91359525 | 91359525 | + | 0.00033283 | 0.00353439 | -26.25994695 |
| chr8 | 91525162 | 91525162 | + | 9.56E-10   | 3.16E-08   | -42.43498818 |
| chr8 | 91747780 | 91747780 | + | 9.63E-06   | 0.00016001 | -31.8677792  |
| chr8 | 91747783 | 91747783 | + | 3.27E-08   | 8.70E-07   | -35.04909724 |
| chr8 | 92066690 | 92066690 | + | 0          | 0          | -38.91415831 |
| chr8 | 92066816 | 92066816 | - | 0          | 0          | -34.77152603 |
| chr8 | 92075186 | 92075186 | + | 1.13E-13   | 5.72E-12   | -32.5        |
| chr8 | 92114053 | 92114053 | + | 5.11E-09   | 1.53E-07   | -35.05918796 |
| chr8 | 92114080 | 92114080 | + | 1.70E-09   | 5.42E-08   | -35.10359869 |
| chr8 | 92114085 | 92114085 | + | 2.48E-11   | 9.89E-10   | -40.35433071 |
| chr8 | 92133967 | 92133967 | + | 4.70E-13   | 2.24E-11   | -29.04392247 |
| chr8 | 92205510 | 92205510 | + | 7.90E-11   | 2.98E-09   | 28.69757174  |
| chr8 | 92232146 | 92232146 | - | 0.00085986 | 0.00780151 | -27.56410256 |
| chr8 | 92232164 | 92232164 | - | 0.000105   | 0.00131534 | -25.98389982 |
| chr8 | 92384796 | 92384796 | + | 5.25E-08   | 1.35E-06   | -36.11111111 |
| chr8 | 93917910 | 93917910 | + | 0          | 0          | -25.17833431 |
| chr8 | 94324337 | 94324337 | - | 2.51E-14   | 1.35E-12   | -32.74254773 |
| chr8 | 94780997 | 94780997 | - | 5.66E-08   | 1.45E-06   | -32.00421941 |
| chr8 | 94875612 | 94875612 | + | 0          | 0          | -28.52944463 |
| chr8 | 94899165 | 94899165 | + | 4.33E-07   | 9.52E-06   | -33.32746479 |
| chr8 | 94922523 | 94922523 | - | 0          | 0          | -25.10413348 |
| chr8 | 94922564 | 94922564 | - | 0          | 0          | -28.18323908 |
| chr8 | 94996201 | 94996201 | + | 0          | 0          | -31.3193802  |
| chr8 | 94996214 | 94996214 | + | 0          | 0          | -30.26482563 |
| chr8 | 94996215 | 94996215 | - | 1.44E-13   | 7.23E-12   | -26.12322159 |

|      |           |           |   |            |            |              |
|------|-----------|-----------|---|------------|------------|--------------|
| chr8 | 95143238  | 95143238  | + | 0          | 0          | -36.45516811 |
| chr8 | 95143374  | 95143374  | - | 0          | 0          | -33.06193542 |
| chr8 | 95391580  | 95391580  | + | 0          | 0          | -26.98749399 |
| chr8 | 95391711  | 95391711  | - | 0          | 0          | -33.88860544 |
| chr8 | 104106702 | 104106702 | - | 7.88E-05   | 0.00102596 | -34.74576271 |
| chr8 | 104110823 | 104110823 | - | 0          | 0          | -31.48176113 |
| chr8 | 104422540 | 104422540 | - | 1.33E-12   | 6.05E-11   | -29.49332172 |
| chr8 | 104422550 | 104422550 | - | 1.98E-10   | 7.11E-09   | -25.93344752 |
| chr8 | 105142890 | 105142890 | + | 3.08E-09   | 9.52E-08   | -38.0952381  |
| chr8 | 105152488 | 105152488 | + | 2.13E-12   | 9.53E-11   | -49.15216421 |
| chr8 | 105152514 | 105152514 | + | 1.22E-06   | 2.46E-05   | -34.5751634  |
| chr8 | 105255390 | 105255390 | - | 0.00011158 | 0.00138537 | -33.60227812 |
| chr8 | 105259003 | 105259003 | + | 2.76E-13   | 1.34E-11   | -42.6149881  |
| chr8 | 105259009 | 105259009 | + | 6.61E-09   | 1.95E-07   | -31.27478192 |
| chr8 | 105259047 | 105259047 | + | 0          | 0          | -69.15146709 |
| chr8 | 105259250 | 105259250 | - | 0          | 0          | -66.21396896 |
| chr8 | 105259254 | 105259254 | - | 0          | 0          | -73.95584386 |
| chr8 | 105259256 | 105259256 | - | 0          | 0          | -71.39963996 |
| chr8 | 105259262 | 105259262 | - | 0          | 0          | -70.59405941 |
| chr8 | 105259289 | 105259289 | + | 0          | 0          | -65.37726908 |
| chr8 | 105259290 | 105259290 | - | 0          | 0          | -82.77716186 |
| chr8 | 105259330 | 105259330 | + | 0          | 0          | -30.72810343 |
| chr8 | 105259331 | 105259331 | - | 0          | 0          | -29.38477073 |
| chr8 | 105259345 | 105259345 | + | 0          | 0          | -43.18753707 |
| chr8 | 105259355 | 105259355 | + | 0          | 0          | -40.50296171 |
| chr8 | 105259474 | 105259474 | - | 0          | 0          | -36.67682136 |
| chr8 | 105268746 | 105268746 | + | 0          | 0          | -26.55229893 |
| chr8 | 105268783 | 105268783 | - | 0          | 0          | -26.36131661 |
| chr8 | 105268787 | 105268787 | - | 0          | 0          | -25.27536911 |
| chr8 | 105268791 | 105268791 | - | 0          | 0          | -29.41656527 |
| chr8 | 105270995 | 105270995 | + | 0          | 0          | -37.24490171 |
| chr8 | 105270996 | 105270996 | - | 0          | 0          | -38.10109261 |
| chr8 | 105271005 | 105271005 | + | 0          | 0          | -46.7663872  |
| chr8 | 105271006 | 105271006 | - | 0          | 0          | -42.75342244 |
| chr8 | 105271026 | 105271026 | - | 0          | 0          | -28.40025533 |
| chr8 | 105272385 | 105272385 | + | 6.66E-15   | 3.79E-13   | -26.57939189 |
| chr8 | 105285757 | 105285757 | - | 4.63E-10   | 1.59E-08   | -25.77787381 |
| chr8 | 105338497 | 105338497 | + | 5.50E-06   | 9.67E-05   | -30.58419244 |
| chr8 | 105346765 | 105346765 | + | 4.40E-12   | 1.90E-10   | -28.12103259 |
| chr8 | 105355348 | 105355348 | - | 1.65E-07   | 3.92E-06   | -36.83823529 |
| chr8 | 105355354 | 105355354 | - | 9.92E-06   | 0.00016429 | -26.82076683 |

|      |           |           |   |          |          |              |
|------|-----------|-----------|---|----------|----------|--------------|
| chr8 | 105375028 | 105375028 | + | 0        | 0        | -25.24839861 |
| chr8 | 105378807 | 105378807 | + | 7.03E-12 | 2.97E-10 | -25.80203379 |
| chr8 | 105517563 | 105517563 | - | 0        | 0        | -28.72998041 |
| chr8 | 105594120 | 105594120 | + | 0        | 0        | -39.14067328 |
| chr8 | 105594129 | 105594129 | + | 0        | 0        | -33.45904404 |
| chr8 | 105594130 | 105594130 | - | 0        | 0        | -38.96071309 |
| chr8 | 105594146 | 105594146 | + | 0        | 0        | -32.29172887 |
| chr8 | 105594147 | 105594147 | - | 0        | 0        | -34.12765281 |
| chr8 | 105594152 | 105594152 | + | 0        | 0        | -44.49893948 |
| chr8 | 105594153 | 105594153 | - | 0        | 0        | -47.09976175 |
| chr8 | 105594178 | 105594178 | - | 0        | 0        | -42.73034124 |
| chr8 | 105614450 | 105614450 | - | 1.13E-12 | 5.19E-11 | -31.59611845 |
| chr8 | 105614453 | 105614453 | - | 3.10E-09 | 9.56E-08 | -28.72707614 |
| chr8 | 105693861 | 105693861 | - | 3.22E-15 | 1.89E-13 | -47.54558205 |
| chr8 | 105693873 | 105693873 | - | 9.20E-10 | 3.05E-08 | -27.8128065  |
| chr8 | 105693880 | 105693880 | - | 6.12E-11 | 2.34E-09 | -26.6595975  |
| chr8 | 105693883 | 105693883 | - | 1.43E-14 | 7.90E-13 | -36.26488095 |
| chr8 | 105693898 | 105693898 | - | 4.75E-13 | 2.26E-11 | -26.02339181 |
| chr8 | 105693902 | 105693902 | - | 0        | 0        | -34.26604757 |
| chr8 | 105693905 | 105693905 | - | 0        | 0        | -37.77018176 |
| chr8 | 105693910 | 105693910 | + | 0        | 0        | -33.09001309 |
| chr8 | 105693911 | 105693911 | - | 0        | 0        | -39.96319839 |
| chr8 | 105693922 | 105693922 | + | 0        | 0        | -29.59977496 |
| chr8 | 105693925 | 105693925 | - | 0        | 0        | -37.6819319  |
| chr8 | 105693934 | 105693934 | - | 0        | 0        | -27.13493094 |
| chr8 | 105693944 | 105693944 | + | 0        | 0        | -27.65450041 |
| chr8 | 105693945 | 105693945 | - | 0        | 0        | -31.79188522 |
| chr8 | 105693973 | 105693973 | + | 0        | 0        | -31.14453961 |
| chr8 | 105693974 | 105693974 | - | 0        | 0        | -38.94178809 |
| chr8 | 105693979 | 105693979 | + | 0        | 0        | -31.93102798 |
| chr8 | 105694094 | 105694094 | + | 0        | 0        | -28.72021763 |
| chr8 | 105694095 | 105694095 | - | 0        | 0        | -26.15476388 |
| chr8 | 105694132 | 105694132 | + | 3.21E-13 | 1.56E-11 | -26.27903722 |
| chr8 | 105727965 | 105727965 | + | 0        | 0        | -28.89951544 |
| chr8 | 105728001 | 105728001 | - | 0        | 0        | -25.68836203 |
| chr8 | 105728051 | 105728051 | + | 0        | 0        | -34.87889329 |
| chr8 | 105728160 | 105728160 | - | 1.48E-06 | 2.95E-05 | -25.20965476 |
| chr8 | 106280995 | 106280995 | + | 1.65E-08 | 4.58E-07 | -28.50283719 |
| chr8 | 106611160 | 106611160 | + | 0        | 0        | -27.47647115 |
| chr8 | 106611195 | 106611195 | + | 0        | 0        | -27.93207639 |
| chr8 | 106839205 | 106839205 | + | 0        | 0        | -44.48996463 |

|      |           |           |   |            |            |              |
|------|-----------|-----------|---|------------|------------|--------------|
| chr8 | 106839225 | 106839225 | + | 0          | 0          | -30.18155137 |
| chr8 | 106839357 | 106839357 | - | 0          | 0          | -43.82134729 |
| chr8 | 107109289 | 107109289 | + | 1.58E-07   | 3.75E-06   | -43.19042871 |
| chr8 | 107115079 | 107115079 | - | 0          | 0          | -37.96395028 |
| chr8 | 107115111 | 107115111 | + | 1.54E-06   | 3.05E-05   | -25.18124507 |
| chr8 | 107119035 | 107119035 | - | 0          | 0          | -27.29941984 |
| chr8 | 107226528 | 107226528 | + | 2.00E-07   | 4.67E-06   | -33.67117117 |
| chr8 | 107556513 | 107556513 | + | 1.66E-09   | 5.31E-08   | -37.82862707 |
| chr8 | 107556795 | 107556795 | + | 0          | 0          | -26.98802843 |
| chr8 | 108068456 | 108068456 | + | 2.80E-05   | 0.00041433 | -34.00467542 |
| chr8 | 108647045 | 108647045 | + | 4.27E-05   | 0.0006012  | -32.61455526 |
| chr8 | 108695406 | 108695406 | - | 0          | 0          | -45.74553732 |
| chr8 | 108695425 | 108695425 | + | 0          | 0          | -43.8061674  |
| chr8 | 108695466 | 108695466 | + | 0          | 0          | -42.30769231 |
| chr8 | 108695467 | 108695467 | - | 0          | 0          | -42.2438777  |
| chr8 | 108695505 | 108695505 | - | 0          | 0          | -34.76485518 |
| chr8 | 108713740 | 108713740 | + | 0          | 0          | -29.69556642 |
| chr8 | 108713803 | 108713803 | - | 0          | 0          | -40.51500519 |
| chr8 | 108713805 | 108713805 | - | 0          | 0          | -42.12634656 |
| chr8 | 108713811 | 108713811 | + | 0          | 0          | -36.96375133 |
| chr8 | 108713812 | 108713812 | - | 0          | 0          | -38.74378604 |
| chr8 | 108713930 | 108713930 | + | 0          | 0          | -29.11152672 |
| chr8 | 108713931 | 108713931 | - | 1.30E-09   | 4.22E-08   | -35.65519958 |
| chr8 | 108713969 | 108713969 | + | 0          | 0          | -42.68959991 |
| chr8 | 108714025 | 108714025 | - | 0          | 0          | -33.43976379 |
| chr8 | 108714036 | 108714036 | - | 0          | 0          | -41.21697652 |
| chr8 | 108714063 | 108714063 | - | 0          | 0          | -31.88609546 |
| chr8 | 108714073 | 108714073 | - | 0          | 0          | -33.74239574 |
| chr8 | 108726810 | 108726810 | + | 4.44E-16   | 2.79E-14   | -29.99789817 |
| chr8 | 108893850 | 108893850 | + | 0.00018707 | 0.00216441 | -32.25806452 |
| chr8 | 108900591 | 108900591 | - | 0          | 0          | -25.18326168 |
| chr8 | 108900929 | 108900929 | + | 0          | 0          | -37.22269886 |
| chr8 | 108900938 | 108900938 | + | 0          | 0          | -30.85483871 |
| chr8 | 108900940 | 108900940 | + | 0          | 0          | -40.48786442 |
| chr8 | 108900951 | 108900951 | + | 0          | 0          | -27.3942953  |
| chr8 | 108900952 | 108900952 | - | 0          | 0          | -37.15052801 |
| chr8 | 108900978 | 108900978 | + | 0          | 0          | -38.72649457 |
| chr8 | 108900979 | 108900979 | - | 0          | 0          | -45.73120006 |
| chr8 | 108900997 | 108900997 | + | 0          | 0          | -40.64415911 |
| chr8 | 108900998 | 108900998 | - | 0          | 0          | -44.78291317 |
| chr8 | 108901030 | 108901030 | + | 0          | 0          | -29.42603382 |

|      |           |           |   |            |            |              |
|------|-----------|-----------|---|------------|------------|--------------|
| chr8 | 108901299 | 108901299 | - | 2.22E-15   | 1.32E-13   | -26.62835249 |
| chr8 | 108901324 | 108901324 | + | 8.99E-06   | 0.00015042 | -33.52303523 |
| chr8 | 109961561 | 109961561 | + | 0.00037059 | 0.00386983 | 34.44444444  |
| chr8 | 110727080 | 110727080 | - | 0.00055293 | 0.00541155 | -28.27004219 |
| chr8 | 110927129 | 110927129 | + | 8.18E-09   | 2.38E-07   | -25.48716363 |
| chr8 | 111090743 | 111090743 | + | 2.77E-05   | 0.00041009 | 25.80297689  |
| chr8 | 111625081 | 111625081 | - | 1.44E-13   | 7.23E-12   | -26.10167051 |
| chr8 | 111626779 | 111626779 | - | 2.91E-13   | 1.42E-11   | -25.16422764 |
| chr8 | 111735368 | 111735368 | + | 0          | 0          | -28.49687466 |
| chr8 | 111794995 | 111794995 | + | 0          | 0          | -25.49843241 |
| chr8 | 114707704 | 114707704 | + | 0          | 0          | -25.91365018 |
| chr8 | 114707714 | 114707714 | + | 0          | 0          | -26.74449676 |
| chr8 | 114819210 | 114819210 | + | 1.13E-05   | 0.00018524 | -29.00337705 |
| chr8 | 114941628 | 114941628 | - | 0          | 0          | -25.48571102 |
| chr8 | 114941660 | 114941660 | - | 0          | 0          | -30.15662839 |
| chr8 | 115010778 | 115010778 | - | 0          | 0          | -30.30819293 |
| chr8 | 115151786 | 115151786 | + | 1.69E-09   | 5.42E-08   | -25.28624415 |
| chr8 | 115227304 | 115227304 | + | 0          | 0          | -26.60108025 |
| chr8 | 115304904 | 115304904 | + | 0          | 0          | -45.45326651 |
| chr8 | 115304932 | 115304932 | + | 0          | 0          | -39.43199612 |
| chr8 | 115304977 | 115304977 | - | 0          | 0          | -26.65576379 |
| chr8 | 115305009 | 115305009 | - | 0          | 0          | -32.74533765 |
| chr8 | 115305016 | 115305016 | - | 0          | 0          | -35.62818771 |
| chr8 | 115305021 | 115305021 | - | 0          | 0          | -34.17636194 |
| chr8 | 115305052 | 115305052 | - | 5.38E-08   | 1.38E-06   | -30.13605442 |
| chr8 | 115474380 | 115474380 | + | 0          | 0          | -30.12075067 |
| chr8 | 115474438 | 115474438 | - | 0          | 0          | -33.36307517 |
| chr8 | 115474441 | 115474441 | - | 0          | 0          | -25.13837145 |
| chr8 | 115536893 | 115536893 | + | 0          | 0          | -32.44947297 |
| chr8 | 115536909 | 115536909 | + | 0          | 0          | -27.01966694 |
| chr8 | 115536946 | 115536946 | - | 0          | 0          | -40.19227485 |
| chr8 | 115536966 | 115536966 | - | 0          | 0          | -40.17427542 |
| chr8 | 115632856 | 115632856 | - | 0          | 0          | -27.133838   |
| chr8 | 117137553 | 117137553 | - | 1.27E-11   | 5.21E-10   | -42.69972452 |
| chr8 | 117267566 | 117267566 | + | 2.29E-11   | 9.16E-10   | -25.02790936 |
| chr8 | 117278356 | 117278356 | - | 0          | 0          | -27.27865721 |
| chr8 | 117280710 | 117280710 | - | 0          | 0          | -26.60332864 |
| chr8 | 117280714 | 117280714 | - | 0          | 0          | -25.72441091 |
| chr8 | 117300908 | 117300908 | - | 0          | 0          | -41.63356504 |
| chr8 | 117339880 | 117339880 | - | 0          | 0          | -47.41240334 |
| chr8 | 117339900 | 117339900 | - | 0          | 0          | -39.68843148 |

|      |           |           |   |            |            |              |
|------|-----------|-----------|---|------------|------------|--------------|
| chr8 | 117345105 | 117345105 | - | 0          | 0          | -25.05285789 |
| chr8 | 117370554 | 117370554 | - | 0          | 0          | -26.62845667 |
| chr8 | 117370581 | 117370581 | - | 0          | 0          | -27.71876548 |
| chr8 | 117377240 | 117377240 | + | 0.00072542 | 0.00677792 | -29.22705314 |
| chr8 | 117469993 | 117469993 | + | 0          | 0          | -34.63617511 |
| chr8 | 117470100 | 117470100 | - | 0          | 0          | -31.36992565 |
| chr8 | 117538545 | 117538545 | + | 4.33E-06   | 7.80E-05   | -25.51222736 |
| chr8 | 117700938 | 117700938 | + | 1.79E-06   | 3.51E-05   | -33.00865801 |
| chr8 | 117700944 | 117700944 | - | 0.00023085 | 0.00258995 | -28.40607668 |
| chr8 | 118718580 | 118718580 | - | 0.00026217 | 0.00288802 | 29.4017094   |
| chr8 | 119404075 | 119404075 | + | 0          | 0          | -42.58274232 |
| chr8 | 119465240 | 119465240 | + | 0.00010908 | 0.00135871 | -27.27075421 |
| chr8 | 119465433 | 119465433 | + | 0.00016953 | 0.0019889  | -30.76923077 |
| chr8 | 119502644 | 119502644 | - | 0.00062565 | 0.00599687 | -35.0132626  |
| chr8 | 119503621 | 119503621 | + | 1.05E-05   | 0.00017243 | -25.74002574 |
| chr8 | 119661250 | 119661250 | + | 0          | 0          | -30.09407687 |
| chr8 | 119661251 | 119661251 | - | 0          | 0          | -31.58534736 |
| chr8 | 119661374 | 119661374 | + | 1.21E-09   | 3.93E-08   | -25.28460838 |
| chr8 | 119806710 | 119806710 | - | 0          | 0          | -37.03310977 |
| chr8 | 119862977 | 119862977 | - | 1.81E-10   | 6.53E-09   | -31.54778555 |
| chr8 | 120036313 | 120036313 | + | 0          | 0          | -32.13160767 |
| chr8 | 120036322 | 120036322 | + | 0          | 0          | -30.98865178 |
| chr8 | 120105043 | 120105043 | + | 0          | 0          | -35.42282452 |
| chr8 | 120105090 | 120105090 | + | 0          | 0          | -40.09413778 |
| chr8 | 120105155 | 120105155 | - | 0          | 0          | -42.73344948 |
| chr8 | 120150273 | 120150273 | - | 7.54E-09   | 2.20E-07   | -25.37168714 |
| chr8 | 120178413 | 120178413 | + | 5.22E-15   | 3.00E-13   | -30.9860347  |
| chr8 | 120208003 | 120208003 | + | 6.08E-08   | 1.55E-06   | -29.47214076 |
| chr8 | 120208006 | 120208006 | + | 8.51E-08   | 2.12E-06   | -32.78867102 |
| chr8 | 120208180 | 120208180 | - | 0          | 0          | -27.93636184 |
| chr8 | 120208197 | 120208197 | - | 0          | 0          | -27.54314179 |
| chr8 | 120211171 | 120211171 | - | 4.69E-06   | 8.38E-05   | -30.35005413 |
| chr8 | 120217169 | 120217169 | - | 4.28E-13   | 2.05E-11   | -29.36789539 |
| chr8 | 120242757 | 120242757 | + | 0          | 0          | -27.02963659 |
| chr8 | 120261372 | 120261372 | + | 0          | 0          | -29.86021194 |
| chr8 | 120261375 | 120261375 | + | 0          | 0          | -28.01902556 |
| chr8 | 120261395 | 120261395 | + | 0          | 0          | -44.66239498 |
| chr8 | 120261397 | 120261397 | + | 0          | 0          | -43.25660399 |
| chr8 | 120261430 | 120261430 | - | 0          | 0          | -31.07947592 |
| chr8 | 120261464 | 120261464 | - | 0          | 0          | -33.13255207 |
| chr8 | 120275660 | 120275660 | + | 1.25E-05   | 0.00020229 | -34.84848485 |

|      |           |           |   |            |            |              |
|------|-----------|-----------|---|------------|------------|--------------|
| chr8 | 120275661 | 120275661 | - | 0.00083963 | 0.00764885 | -30.47765794 |
| chr8 | 120277886 | 120277886 | + | 4.44E-07   | 9.75E-06   | -26.28463522 |
| chr8 | 120278075 | 120278075 | - | 2.64E-05   | 0.00039347 | -38.99521531 |
| chr8 | 120278110 | 120278110 | - | 3.70E-05   | 0.00052863 | -29.3062201  |
| chr8 | 120292450 | 120292450 | + | 0.00011907 | 0.00146575 | -29.71509972 |
| chr8 | 120292462 | 120292462 | + | 0.00025986 | 0.00286608 | -28.05176132 |
| chr8 | 120295574 | 120295574 | - | 0          | 0          | -27.97957096 |
| chr8 | 120307670 | 120307670 | + | 0          | 0          | -27.54972376 |
| chr8 | 120331556 | 120331556 | - | 0.00083749 | 0.0076326  | -27.84461153 |
| chr8 | 120331811 | 120331811 | + | 0          | 0          | -33.99930228 |
| chr8 | 120346619 | 120346619 | + | 1.84E-10   | 6.64E-09   | -38.38202247 |
| chr8 | 120398173 | 120398173 | + | 7.90E-07   | 1.66E-05   | -28.76712329 |
| chr8 | 120407587 | 120407587 | + | 1.03E-09   | 3.38E-08   | -41.65790027 |
| chr8 | 120407809 | 120407809 | - | 8.89E-08   | 2.21E-06   | -31.51645979 |
| chr8 | 120407818 | 120407818 | - | 1.19E-10   | 4.38E-09   | -38.17492191 |
| chr8 | 120407821 | 120407821 | - | 1.56E-08   | 4.36E-07   | -28.86130599 |
| chr8 | 120426944 | 120426944 | + | 0          | 0          | -29.89716705 |
| chr8 | 120450186 | 120450186 | + | 0          | 0          | -26.81297085 |
| chr8 | 120450213 | 120450213 | + | 0          | 0          | -25.91542601 |
| chr8 | 120471371 | 120471371 | + | 0          | 0          | -37.06189286 |
| chr8 | 120471406 | 120471406 | + | 0          | 0          | -35.36036036 |
| chr8 | 120471407 | 120471407 | - | 0          | 0          | -34.28289125 |
| chr8 | 120471438 | 120471438 | - | 0          | 0          | -26.19369203 |
| chr8 | 120478668 | 120478668 | + | 0          | 0          | -28.15991488 |
| chr8 | 120478669 | 120478669 | - | 0          | 0          | -26.78808611 |
| chr8 | 120481317 | 120481317 | + | 7.82E-06   | 0.00013269 | -26.43678161 |
| chr8 | 120481334 | 120481334 | + | 1.92E-06   | 3.73E-05   | -29.3133583  |
| chr8 | 120481717 | 120481717 | + | 0          | 0          | -31.50159796 |
| chr8 | 120481718 | 120481718 | - | 5.45E-09   | 1.63E-07   | -44.3221831  |
| chr8 | 120486526 | 120486526 | + | 0          | 0          | -33.4754608  |
| chr8 | 120486544 | 120486544 | + | 0          | 0          | -31.39165744 |
| chr8 | 120486563 | 120486563 | + | 1.51E-14   | 8.30E-13   | -26.58972904 |
| chr8 | 120500439 | 120500439 | + | 0          | 0          | -25.29761905 |
| chr8 | 120500440 | 120500440 | - | 0          | 0          | -28.61478813 |
| chr8 | 120501079 | 120501079 | + | 2.22E-16   | 1.43E-14   | -25.69398191 |
| chr8 | 120504507 | 120504507 | + | 9.45E-05   | 0.00120128 | -29.08113392 |
| chr8 | 120516689 | 120516689 | + | 0          | 0          | -25.74082264 |
| chr8 | 120518221 | 120518221 | + | 0          | 0          | -27.79693487 |
| chr8 | 120533266 | 120533266 | + | 0.00013565 | 0.0016409  | -25.24893314 |
| chr8 | 120533273 | 120533273 | + | 6.39E-07   | 1.36E-05   | -30.15647226 |
| chr8 | 120533281 | 120533281 | + | 2.13E-08   | 5.84E-07   | -36.79468943 |



|      |           |           |   |            |            |              |
|------|-----------|-----------|---|------------|------------|--------------|
| chr8 | 120563449 | 120563449 | + | 0          | 0          | -26.76916764 |
| chr8 | 120563465 | 120563465 | + | 0          | 0          | -30.80814855 |
| chr8 | 120567040 | 120567040 | + | 2.90E-09   | 8.98E-08   | -26.16741182 |
| chr8 | 120567066 | 120567066 | - | 0          | 0          | -26.7039076  |
| chr8 | 120567388 | 120567388 | + | 0.00116335 | 0.00998865 | -30.85714286 |
| chr8 | 120598567 | 120598567 | + | 0          | 0          | -34.23022687 |
| chr8 | 120598568 | 120598568 | - | 0          | 0          | -31.41564733 |
| chr8 | 120598574 | 120598574 | + | 0          | 0          | -35.79301547 |
| chr8 | 120598575 | 120598575 | - | 0          | 0          | -33.35210295 |
| chr8 | 120732001 | 120732001 | + | 5.67E-11   | 2.17E-09   | -31.12745098 |
| chr8 | 120750774 | 120750774 | + | 0          | 0          | -26.25507012 |
| chr8 | 120750775 | 120750775 | - | 0          | 0          | -28.11367538 |
| chr8 | 120807016 | 120807016 | + | 0          | 0          | -26.14799915 |
| chr8 | 121074128 | 121074128 | + | 2.05E-07   | 4.78E-06   | -29.27296561 |
| chr8 | 121175154 | 121175154 | + | 0.00061124 | 0.00588221 | -29.13636364 |
| chr8 | 121175384 | 121175384 | + | 2.07E-05   | 0.00031641 | -25.25994575 |
| chr8 | 121220224 | 121220224 | - | 0          | 0          | -27.75651386 |
| chr8 | 121220261 | 121220261 | + | 0          | 0          | -27.75373683 |
| chr8 | 121220368 | 121220368 | - | 6.94E-10   | 2.33E-08   | -27.78664731 |
| chr8 | 121282034 | 121282034 | - | 7.08E-08   | 1.79E-06   | -36.92810458 |
| chr8 | 121300517 | 121300517 | + | 0          | 0          | -35.17512077 |
| chr8 | 121372223 | 121372223 | + | 0.00013209 | 0.00160393 | -31.92989525 |
| chr8 | 121372255 | 121372255 | + | 1.84E-08   | 5.09E-07   | -43.55358582 |
| chr8 | 121372505 | 121372505 | - | 1.01E-06   | 2.07E-05   | -25.65409446 |
| chr8 | 121372600 | 121372600 | - | 0          | 0          | -27.69916453 |
| chr8 | 121374582 | 121374582 | + | 0          | 0          | -27.38206859 |
| chr8 | 121377929 | 121377929 | - | 0          | 0          | -34.20864821 |
| chr8 | 121396409 | 121396409 | + | 7.22E-08   | 1.82E-06   | -43.59301056 |
| chr8 | 121397449 | 121397449 | - | 0          | 0          | -25.4420591  |
| chr8 | 121550504 | 121550504 | + | 6.89E-05   | 0.00091297 | -30.23255814 |
| chr8 | 122163429 | 122163429 | - | 5.73E-06   | 0.00010033 | -33.40195574 |
| chr8 | 122234268 | 122234268 | + | 0          | 0          | -25.68152815 |
| chr8 | 122242210 | 122242210 | - | 0.000487   | 0.00486619 | 29.62962963  |
| chr8 | 122269173 | 122269173 | - | 0          | 0          | -40.64327485 |
| chr8 | 122269195 | 122269195 | - | 0          | 0          | -40.44840698 |
| chr8 | 122269197 | 122269197 | - | 7.55E-15   | 4.27E-13   | -30.03824654 |
| chr8 | 122269200 | 122269200 | - | 0          | 0          | -38.55726621 |
| chr8 | 122269220 | 122269220 | - | 0          | 0          | -35.13911097 |
| chr8 | 122277339 | 122277339 | + | 0          | 0          | -25.99109352 |
| chr8 | 122285959 | 122285959 | - | 5.86E-09   | 1.74E-07   | -25.44090056 |
| chr8 | 122286358 | 122286358 | + | 0          | 0          | -32.29166667 |

|      |           |           |   |            |            |              |
|------|-----------|-----------|---|------------|------------|--------------|
| chr8 | 122287085 | 122287085 | - | 1.54E-11   | 6.29E-10   | -25.03304693 |
| chr8 | 122287090 | 122287090 | - | 1.48E-14   | 8.13E-13   | -25.43859649 |
| chr8 | 122496896 | 122496896 | + | 2.55E-15   | 1.51E-13   | -31.36228519 |
| chr8 | 122523122 | 122523122 | - | 2.09E-12   | 9.34E-11   | -26.00382567 |
| chr8 | 122523441 | 122523441 | + | 0          | 0          | -27.75577077 |
| chr8 | 122547254 | 122547254 | + | 0          | 0          | -25.5610814  |
| chr8 | 122547327 | 122547327 | - | 0          | 0          | -33.51723029 |
| chr8 | 122547329 | 122547329 | - | 0          | 0          | -36.01487371 |
| chr8 | 122547335 | 122547335 | + | 0          | 0          | -25.53389891 |
| chr8 | 122547336 | 122547336 | - | 0          | 0          | -36.70869513 |
| chr8 | 122548546 | 122548546 | - | 0          | 0          | -35.52545523 |
| chr8 | 122549874 | 122549874 | + | 7.09E-10   | 2.38E-08   | -28.11107379 |
| chr8 | 122549875 | 122549875 | - | 7.24E-06   | 0.00012381 | -39.85815603 |
| chr8 | 122550032 | 122550032 | - | 0          | 0          | -26.41002245 |
| chr8 | 122574988 | 122574988 | + | 0          | 0          | -28.82431314 |
| chr8 | 122575396 | 122575396 | - | 1.51E-05   | 0.00023901 | -35.04901961 |
| chr8 | 122575445 | 122575445 | - | 2.96E-05   | 0.00043543 | -32.91139241 |
| chr8 | 122664571 | 122664571 | + | 0.00042363 | 0.00432758 | -30.10244287 |
| chr8 | 122672021 | 122672021 | + | 3.42E-05   | 0.00049324 | -28.42105263 |
| chr8 | 122674024 | 122674024 | + | 0          | 0          | -33.72598312 |
| chr8 | 122674054 | 122674054 | + | 0          | 0          | -39.51284498 |
| chr8 | 122674068 | 122674068 | + | 0          | 0          | -40.18663302 |
| chr8 | 122674113 | 122674113 | - | 0          | 0          | -38.31885027 |
| chr8 | 122674146 | 122674146 | + | 0          | 0          | -35.47767366 |
| chr8 | 122674147 | 122674147 | - | 0          | 0          | -33.80690352 |
| chr8 | 122674174 | 122674174 | + | 0          | 0          | -42.47858103 |
| chr8 | 122674175 | 122674175 | - | 0          | 0          | -41.51361034 |
| chr8 | 122674190 | 122674190 | + | 0          | 0          | -37.29688119 |
| chr8 | 122674191 | 122674191 | - | 0          | 0          | -41.06232002 |
| chr8 | 122674195 | 122674195 | + | 0          | 0          | -41.87197236 |
| chr8 | 122674196 | 122674196 | - | 0          | 0          | -37.52830026 |
| chr8 | 122674198 | 122674198 | - | 0          | 0          | -43.37186243 |
| chr8 | 122674204 | 122674204 | - | 0          | 0          | -35.26883922 |
| chr8 | 122676256 | 122676256 | + | 0          | 0          | -33.11843636 |
| chr8 | 122676257 | 122676257 | - | 0          | 0          | -40.43810834 |
| chr8 | 122676291 | 122676291 | + | 0          | 0          | -47.48326228 |
| chr8 | 122676292 | 122676292 | - | 0          | 0          | -40.93518338 |
| chr8 | 122676310 | 122676310 | - | 0          | 0          | -35.18930935 |
| chr8 | 122676327 | 122676327 | - | 0          | 0          | -30.34695921 |
| chr8 | 122677358 | 122677358 | + | 3.83E-06   | 6.98E-05   | -27.65353458 |
| chr8 | 122677525 | 122677525 | - | 2.60E-08   | 7.03E-07   | -30.79279279 |

|      |           |           |   |            |            |              |
|------|-----------|-----------|---|------------|------------|--------------|
| chr8 | 122679751 | 122679751 | - | 2.60E-06   | 4.92E-05   | -62.22222222 |
| chr8 | 122691303 | 122691303 | + | 5.74E-08   | 1.47E-06   | -26.24319162 |
| chr8 | 122709752 | 122709752 | - | 0          | 0          | -34.31250583 |
| chr8 | 123116621 | 123116621 | + | 0          | 0          | -26.56349206 |
| chr8 | 123116622 | 123116622 | - | 0          | 0          | -30.14739621 |
| chr8 | 123116643 | 123116643 | - | 0          | 0          | -27.87452374 |
| chr8 | 123116800 | 123116800 | - | 4.60E-13   | 2.20E-11   | -50.60296846 |
| chr8 | 123116808 | 123116808 | - | 4.30E-07   | 9.48E-06   | -35.68181818 |
| chr8 | 123135549 | 123135549 | + | 8.88E-16   | 5.45E-14   | -27.70500434 |
| chr8 | 123333394 | 123333394 | - | 0          | 0          | -25.82321761 |
| chr8 | 124099626 | 124099626 | + | 5.41E-11   | 2.08E-09   | -25.32979429 |
| chr8 | 124314227 | 124314227 | + | 0          | 0          | -37.45158209 |
| chr8 | 124314232 | 124314232 | + | 0          | 0          | -39.4809612  |
| chr8 | 124314233 | 124314233 | - | 0          | 0          | -33.1854865  |
| chr8 | 124314237 | 124314237 | + | 0          | 0          | -28.17015557 |
| chr8 | 124314281 | 124314281 | - | 0          | 0          | -29.96159792 |
| chr8 | 124318793 | 124318793 | - | 0          | 0          | -25.22156085 |
| chr8 | 124677636 | 124677636 | + | 9.19E-09   | 2.65E-07   | -26.1870155  |
| chr8 | 125065659 | 125065659 | - | 7.13E-05   | 0.00094002 | -37.5        |
| chr8 | 125198684 | 125198684 | + | 0          | 0          | -37.37056497 |
| chr8 | 125198685 | 125198685 | - | 5.98E-08   | 1.53E-06   | -40.2734108  |
| chr8 | 125198733 | 125198733 | + | 0          | 0          | -33.96678651 |
| chr8 | 125198734 | 125198734 | - | 0          | 0          | -33.93424328 |
| chr8 | 125198766 | 125198766 | + | 0          | 0          | -27.80260708 |
| chr8 | 125282717 | 125282717 | + | 0.00025426 | 0.00281306 | -33.06571514 |
| chr8 | 125282734 | 125282734 | + | 2.50E-08   | 6.78E-07   | -47.61904762 |
| chr8 | 125282741 | 125282741 | + | 2.07E-10   | 7.42E-09   | -51.40350877 |
| chr8 | 125282951 | 125282951 | - | 0.00076706 | 0.0070995  | -32.42790074 |
| chr8 | 125282992 | 125282992 | - | 1.10E-05   | 0.00018073 | -37.57042254 |
| chr8 | 125337692 | 125337692 | + | 0          | 0          | -29.29053395 |
| chr8 | 125337718 | 125337718 | + | 0          | 0          | -35.51255391 |
| chr8 | 125337719 | 125337719 | - | 0          | 0          | -28.30086185 |
| chr8 | 125337750 | 125337750 | - | 0          | 0          | -33.67221147 |
| chr8 | 125716827 | 125716827 | + | 0          | 0          | -30.46934866 |
| chr8 | 125716828 | 125716828 | - | 0          | 0          | -36.68548779 |
| chr8 | 125716844 | 125716844 | + | 0          | 0          | -25.86478132 |
| chr8 | 125724258 | 125724258 | + | 3.33E-16   | 2.11E-14   | -32.73598551 |
| chr8 | 126616037 | 126616037 | - | 8.13E-06   | 0.00013738 | -25.7086999  |
| chr8 | 126661622 | 126661622 | + | 0          | 0          | -27.34481466 |
| chr8 | 126735975 | 126735975 | - | 4.78E-09   | 1.44E-07   | -29.53438587 |
| chr8 | 126736009 | 126736009 | + | 0          | 0          | -29.39987607 |

|      |           |           |   |            |            |              |
|------|-----------|-----------|---|------------|------------|--------------|
| chr8 | 126736010 | 126736010 | - | 0          | 0          | -25.61426351 |
| chr8 | 126736014 | 126736014 | + | 1.52E-12   | 6.90E-11   | -28.86964108 |
| chr8 | 126736054 | 126736054 | + | 1.51E-13   | 7.58E-12   | -30.08332265 |
| chr8 | 126788855 | 126788855 | - | 0          | 0          | -26.70115034 |
| chr8 | 126789206 | 126789206 | + | 0          | 0          | -31.10919297 |
| chr8 | 127593098 | 127593098 | + | 0          | 0          | -25.44217101 |
| chr8 | 128595487 | 128595487 | + | 8.38E-06   | 0.00014116 | -26.78571429 |
| chr9 | 3026927   | 3026927   | - | 6.14E-07   | 1.31E-05   | -52.53353204 |
| chr9 | 3032045   | 3032045   | - | 1.18E-08   | 3.34E-07   | -54.05105438 |
| chr9 | 14001709  | 14001709  | - | 0          | 0          | -26.12818173 |
| chr9 | 14246481  | 14246481  | - | 1.11E-15   | 6.76E-14   | -25.04648729 |
| chr9 | 14382128  | 14382128  | - | 1.62E-06   | 3.20E-05   | -31.37073453 |
| chr9 | 14751277  | 14751277  | - | 3.12E-07   | 7.05E-06   | -25.17039258 |
| chr9 | 14751307  | 14751307  | - | 3.03E-14   | 1.62E-12   | -34.84051263 |
| chr9 | 14860939  | 14860939  | - | 7.10E-05   | 0.00093745 | 28.09116809  |
| chr9 | 15526898  | 15526898  | + | 0.00043924 | 0.00446079 | -25.96837945 |
| chr9 | 15526899  | 15526899  | - | 0          | 0          | -26.76622721 |
| chr9 | 15535708  | 15535708  | + | 0          | 0          | -27.41365935 |
| chr9 | 18009900  | 18009900  | + | 0          | 0          | -27.92986533 |
| chr9 | 18779735  | 18779735  | - | 0.00014054 | 0.00169212 | -35.80891208 |
| chr9 | 20642017  | 20642017  | + | 0          | 0          | -47.09458492 |
| chr9 | 20642018  | 20642018  | - | 0          | 0          | -48.47895132 |
| chr9 | 20642024  | 20642024  | + | 0          | 0          | -38.93650839 |
| chr9 | 20642025  | 20642025  | - | 0          | 0          | -44.72940679 |
| chr9 | 20642033  | 20642033  | + | 0          | 0          | -54.76110255 |
| chr9 | 20642034  | 20642034  | - | 0          | 0          | -57.70145909 |
| chr9 | 20642044  | 20642044  | + | 0          | 0          | -51.89397501 |
| chr9 | 20642045  | 20642045  | - | 0          | 0          | -45.9651248  |
| chr9 | 20642049  | 20642049  | + | 0          | 0          | -54.69416641 |
| chr9 | 20642050  | 20642050  | - | 0          | 0          | -47.31851453 |
| chr9 | 20642143  | 20642143  | + | 1.11E-16   | 7.26E-15   | -27.49603007 |
| chr9 | 20642149  | 20642149  | + | 0          | 0          | -43.90507012 |
| chr9 | 20642150  | 20642150  | - | 3.55E-15   | 2.07E-13   | -35.77410752 |
| chr9 | 20642193  | 20642193  | + | 6.86E-11   | 2.60E-09   | -37.32954545 |
| chr9 | 20642194  | 20642194  | - | 0          | 0          | -30.31252899 |
| chr9 | 20642213  | 20642213  | + | 4.12E-09   | 1.25E-07   | -30.84415584 |
| chr9 | 20642214  | 20642214  | - | 0          | 0          | -35.83364354 |
| chr9 | 20902048  | 20902048  | + | 3.06E-11   | 1.21E-09   | -27.13331309 |
| chr9 | 20972243  | 20972243  | + | 0          | 0          | -31.10279551 |
| chr9 | 21038702  | 21038702  | + | 0          | 0          | -34.00312224 |
| chr9 | 21038717  | 21038717  | + | 0          | 0          | -34.22726801 |

|      |          |          |   |            |            |              |
|------|----------|----------|---|------------|------------|--------------|
| chr9 | 21038729 | 21038729 | + | 0          | 0          | -32.7096598  |
| chr9 | 21038744 | 21038744 | + | 0          | 0          | -27.63090544 |
| chr9 | 21038778 | 21038778 | - | 0          | 0          | -39.27048843 |
| chr9 | 21038784 | 21038784 | - | 0          | 0          | -27.38171436 |
| chr9 | 21038799 | 21038799 | - | 0          | 0          | -36.91400842 |
| chr9 | 21038805 | 21038805 | - | 0          | 0          | -33.4191752  |
| chr9 | 21125904 | 21125904 | + | 0          | 0          | -25.57261703 |
| chr9 | 21248832 | 21248832 | - | 7.33E-15   | 4.15E-13   | -27.87798544 |
| chr9 | 21312136 | 21312136 | + | 0          | 0          | -26.95495892 |
| chr9 | 21312164 | 21312164 | + | 0          | 0          | -28.94321767 |
| chr9 | 21312165 | 21312165 | - | 0          | 0          | -27.56105226 |
| chr9 | 21332374 | 21332374 | - | 0.00057154 | 0.00556373 | -26.86567164 |
| chr9 | 21730119 | 21730119 | - | 5.11E-05   | 0.00070277 | -29.11764706 |
| chr9 | 21858229 | 21858229 | + | 0          | 0          | -25.72480088 |
| chr9 | 21858279 | 21858279 | + | 0          | 0          | -34.48416752 |
| chr9 | 21963552 | 21963552 | + | 6.00E-15   | 3.43E-13   | -26.6226247  |
| chr9 | 21963553 | 21963553 | - | 0          | 0          | -32.4329881  |
| chr9 | 21963746 | 21963746 | - | 1.44E-06   | 2.86E-05   | -38.30321285 |
| chr9 | 21963772 | 21963772 | - | 6.55E-10   | 2.21E-08   | -44.48843839 |
| chr9 | 21991347 | 21991347 | + | 1.11E-15   | 6.76E-14   | -27.56876887 |
| chr9 | 21991568 | 21991568 | + | 0          | 0          | -29.6440451  |
| chr9 | 21991749 | 21991749 | - | 2.78E-14   | 1.49E-12   | -26.82100508 |
| chr9 | 21991760 | 21991760 | - | 0          | 0          | -32.35148515 |
| chr9 | 22056017 | 22056017 | - | 6.27E-11   | 2.39E-09   | -33.64337568 |
| chr9 | 22132427 | 22132427 | + | 0          | 0          | -44.87005336 |
| chr9 | 22132428 | 22132428 | - | 0          | 0          | -43.5381107  |
| chr9 | 22132438 | 22132438 | - | 0          | 0          | -49.03998869 |
| chr9 | 22132442 | 22132442 | - | 0          | 0          | -42.15567867 |
| chr9 | 22132461 | 22132461 | - | 0          | 0          | -30.12402427 |
| chr9 | 22132468 | 22132468 | - | 0          | 0          | -26.3172043  |
| chr9 | 22157798 | 22157798 | - | 0          | 0          | -30.91988232 |
| chr9 | 23204646 | 23204646 | + | 0          | 0          | -30.59264014 |
| chr9 | 23204742 | 23204742 | - | 0          | 0          | -32.80694267 |
| chr9 | 23247363 | 23247363 | - | 1.85E-05   | 0.00028704 | -28.57142857 |
| chr9 | 23529335 | 23529335 | - | 0.00027931 | 0.0030485  | -43.72759857 |
| chr9 | 24451384 | 24451384 | + | 4.44E-16   | 2.79E-14   | -28.27711494 |
| chr9 | 24451397 | 24451397 | + | 0          | 0          | -29.81961337 |
| chr9 | 29818030 | 29818030 | + | 3.93E-07   | 8.72E-06   | -48.37351703 |
| chr9 | 31090205 | 31090205 | - | 0          | 0          | -25.63291139 |
| chr9 | 32028252 | 32028252 | + | 0          | 0          | -26.37055429 |
| chr9 | 32136958 | 32136958 | + | 0.00015517 | 0.00184294 | -25.17482517 |

|      |          |          |   |            |            |              |
|------|----------|----------|---|------------|------------|--------------|
| chr9 | 32550798 | 32550798 | + | 0          | 0          | -32.6587996  |
| chr9 | 32699771 | 32699771 | + | 3.02E-12   | 1.33E-10   | -27.63943889 |
| chr9 | 32710308 | 32710308 | - | 3.73E-05   | 0.00053298 | -25.64162663 |
| chr9 | 33276696 | 33276696 | + | 0.00018921 | 0.00218559 | 36.73020528  |
| chr9 | 34878012 | 34878012 | + | 1.46E-05   | 0.00023227 | 53.07971014  |
| chr9 | 34903503 | 34903503 | + | 3.15E-06   | 5.85E-05   | -25.24717514 |
| chr9 | 35025366 | 35025366 | + | 1.07E-07   | 2.63E-06   | -28.93518519 |
| chr9 | 35025367 | 35025367 | - | 0          | 0          | -26.9103149  |
| chr9 | 35340814 | 35340814 | + | 5.26E-12   | 2.25E-10   | -29.12313433 |
| chr9 | 35444811 | 35444811 | - | 0          | 0          | -29.54558715 |
| chr9 | 37053694 | 37053694 | - | 0          | 0          | -26.28862695 |
| chr9 | 37429475 | 37429475 | + | 1.55E-05   | 0.0002448  | -37.11538462 |
| chr9 | 37429661 | 37429661 | - | 2.91E-10   | 1.03E-08   | -35.88709677 |
| chr9 | 37429668 | 37429668 | - | 5.16E-13   | 2.45E-11   | -35.9248314  |
| chr9 | 37429670 | 37429670 | - | 2.32E-13   | 1.14E-11   | -42.12783172 |
| chr9 | 37429706 | 37429706 | + | 1.84E-08   | 5.09E-07   | -30.69453762 |
| chr9 | 37429736 | 37429736 | - | 9.86E-08   | 2.42E-06   | -28.33333333 |
| chr9 | 37454241 | 37454241 | - | 0          | 0          | -25.80931042 |
| chr9 | 37531576 | 37531576 | + | 0          | 0          | -26.82540747 |
| chr9 | 37531577 | 37531577 | - | 0          | 0          | -25.82891011 |
| chr9 | 40240908 | 40240908 | + | 0          | 0          | -33.22614317 |
| chr9 | 40240917 | 40240917 | + | 0          | 0          | -34.31257344 |
| chr9 | 40376322 | 40376322 | + | 0          | 0          | -41.54755893 |
| chr9 | 40376362 | 40376362 | - | 4.48E-09   | 1.35E-07   | -45.99078341 |
| chr9 | 40391110 | 40391110 | + | 0          | 0          | -25.94105777 |
| chr9 | 40391123 | 40391123 | + | 0          | 0          | -31.02483451 |
| chr9 | 40391232 | 40391232 | - | 0          | 0          | -26.41304348 |
| chr9 | 40391275 | 40391275 | + | 4.87E-08   | 1.26E-06   | -25.21280603 |
| chr9 | 40391495 | 40391495 | + | 2.38E-14   | 1.28E-12   | -32.04041082 |
| chr9 | 40391622 | 40391622 | - | 9.83E-14   | 5.01E-12   | -27.35956119 |
| chr9 | 40391629 | 40391629 | - | 3.44E-15   | 2.01E-13   | -29.04464106 |
| chr9 | 40391636 | 40391636 | - | 1.23E-14   | 6.83E-13   | -28.33893598 |
| chr9 | 40391648 | 40391648 | - | 5.30E-12   | 2.27E-10   | -25.54865983 |
| chr9 | 40391657 | 40391657 | - | 1.67E-15   | 9.99E-14   | -29.3265558  |
| chr9 | 40391661 | 40391661 | - | 0          | 0          | -30.9741035  |
| chr9 | 40391695 | 40391695 | - | 1.11E-16   | 7.26E-15   | -25.27419443 |
| chr9 | 40391698 | 40391698 | - | 0          | 0          | -28.43907035 |
| chr9 | 40391715 | 40391715 | + | 0          | 0          | -33.45641438 |
| chr9 | 40391889 | 40391889 | - | 0          | 0          | -38.03837953 |
| chr9 | 40392557 | 40392557 | + | 0          | 0          | -39.39543695 |
| chr9 | 40392793 | 40392793 | - | 0          | 0          | -34.49051923 |

|      |          |          |   |            |            |              |
|------|----------|----------|---|------------|------------|--------------|
| chr9 | 40628807 | 40628807 | + | 0          | 0          | -26.16724739 |
| chr9 | 40628817 | 40628817 | + | 0          | 0          | -27.25260667 |
| chr9 | 40859461 | 40859461 | - | 1.53E-10   | 5.57E-09   | -25.91012577 |
| chr9 | 40859468 | 40859468 | - | 4.43E-12   | 1.91E-10   | -27.90283401 |
| chr9 | 41069735 | 41069735 | + | 0          | 0          | -32.51816504 |
| chr9 | 41069838 | 41069838 | - | 2.82E-07   | 6.42E-06   | -29.81137233 |
| chr9 | 41157996 | 41157996 | + | 0          | 0          | -33.55453747 |
| chr9 | 41461684 | 41461684 | + | 4.11E-07   | 9.08E-06   | -26.91836735 |
| chr9 | 42002566 | 42002566 | + | 2.93E-07   | 6.65E-06   | -27.89855072 |
| chr9 | 42208682 | 42208682 | - | 1.77E-06   | 3.46E-05   | -31.38736264 |
| chr9 | 42778235 | 42778235 | + | 0.00064186 | 0.00612671 | -25.27472527 |
| chr9 | 42778593 | 42778593 | - | 6.34E-06   | 0.00010997 | -32.33024691 |
| chr9 | 42853104 | 42853104 | - | 0.00015111 | 0.001801   | -35.11029412 |
| chr9 | 42882421 | 42882421 | + | 0          | 0          | -38.0480167  |
| chr9 | 42882428 | 42882428 | + | 0          | 0          | -31.84543191 |
| chr9 | 42898143 | 42898143 | + | 2.08E-08   | 5.69E-07   | -25.18055556 |
| chr9 | 42898144 | 42898144 | - | 0          | 0          | -30.80869873 |
| chr9 | 42898179 | 42898179 | + | 0          | 0          | -38.61502347 |
| chr9 | 42898297 | 42898297 | - | 0          | 0          | -41.07678729 |
| chr9 | 42898303 | 42898303 | - | 0          | 0          | -39.24569018 |
| chr9 | 42898336 | 42898336 | - | 0          | 0          | -40.65804935 |
| chr9 | 42907195 | 42907195 | - | 2.65E-10   | 9.36E-09   | -25.79591837 |
| chr9 | 43238858 | 43238858 | + | 0.00024976 | 0.00277008 | -33.74422188 |
| chr9 | 43239042 | 43239042 | - | 1.74E-07   | 4.12E-06   | -36.30613536 |
| chr9 | 43286878 | 43286878 | + | 0          | 0          | -26.24482489 |
| chr9 | 43286879 | 43286879 | - | 4.44E-15   | 2.57E-13   | -31.29961776 |
| chr9 | 43286934 | 43286934 | - | 0          | 0          | -27.75765991 |
| chr9 | 43745946 | 43745946 | + | 0          | 0          | -37.38775806 |
| chr9 | 43746091 | 43746091 | - | 0          | 0          | -34.62465638 |
| chr9 | 43747147 | 43747147 | + | 0          | 0          | -25.68032852 |
| chr9 | 43747178 | 43747178 | + | 0          | 0          | -32.45671824 |
| chr9 | 43747179 | 43747179 | - | 0          | 0          | -33.04954594 |
| chr9 | 43990200 | 43990200 | + | 0          | 0          | -33.25778778 |
| chr9 | 43990217 | 43990217 | + | 0          | 0          | -31.45007167 |
| chr9 | 43990227 | 43990227 | + | 0          | 0          | -30.73979325 |
| chr9 | 44044486 | 44044486 | + | 0          | 0          | -41.0235238  |
| chr9 | 44044638 | 44044638 | - | 0          | 0          | -29.96323529 |
| chr9 | 44085444 | 44085444 | + | 3.89E-14   | 2.06E-12   | -33.037553   |
| chr9 | 44131283 | 44131283 | + | 4.36E-05   | 0.00061215 | -32.50355619 |
| chr9 | 44268378 | 44268378 | - | 4.14E-05   | 0.00058518 | -27.21238938 |
| chr9 | 44311150 | 44311150 | + | 0          | 0          | -25.92595278 |

|      |          |          |   |            |            |              |
|------|----------|----------|---|------------|------------|--------------|
| chr9 | 44327853 | 44327853 | - | 2.48E-07   | 5.71E-06   | -32.02787714 |
| chr9 | 44485673 | 44485673 | + | 0          | 0          | -26.64025165 |
| chr9 | 44486391 | 44486391 | + | 0          | 0          | -32.01463754 |
| chr9 | 44489968 | 44489968 | + | 0          | 0          | -31.10129053 |
| chr9 | 44505966 | 44505966 | - | 0          | 0          | -29.05559442 |
| chr9 | 44505997 | 44505997 | + | 0          | 0          | -27.82142562 |
| chr9 | 44506051 | 44506051 | - | 0          | 0          | -28.92009494 |
| chr9 | 44506077 | 44506077 | + | 0          | 0          | -38.74058022 |
| chr9 | 44506078 | 44506078 | - | 3.07E-05   | 0.00044922 | -28.74039541 |
| chr9 | 44506086 | 44506086 | + | 0          | 0          | -37.61086632 |
| chr9 | 44723362 | 44723362 | + | 0          | 0          | -33.68416493 |
| chr9 | 44723525 | 44723525 | - | 0          | 0          | -33.14143218 |
| chr9 | 44798747 | 44798747 | + | 0          | 0          | -26.06613245 |
| chr9 | 45136891 | 45136891 | - | 0          | 0          | -27.98313349 |
| chr9 | 45138027 | 45138027 | + | 0          | 0          | -28.98754811 |
| chr9 | 45370942 | 45370942 | - | 5.71E-11   | 2.19E-09   | -28.5879108  |
| chr9 | 45370959 | 45370959 | + | 0          | 0          | -35.07138423 |
| chr9 | 45405834 | 45405834 | - | 3.92E-12   | 1.70E-10   | -26.27564983 |
| chr9 | 45407830 | 45407830 | - | 0.00049949 | 0.00497048 | -30.52325581 |
| chr9 | 45447806 | 45447806 | + | 0          | 0          | -28.50250049 |
| chr9 | 45447807 | 45447807 | - | 0          | 0          | -28.07809451 |
| chr9 | 45447910 | 45447910 | - | 0          | 0          | -32.85232558 |
| chr9 | 45555284 | 45555284 | + | 0          | 0          | -27.04697007 |
| chr9 | 45555318 | 45555318 | + | 0          | 0          | -25.06944975 |
| chr9 | 45555328 | 45555328 | - | 0          | 0          | -37.62189029 |
| chr9 | 45935930 | 45935930 | + | 0          | 0          | -39.52505965 |
| chr9 | 45935963 | 45935963 | - | 0          | 0          | -37.94018618 |
| chr9 | 45935969 | 45935969 | - | 0          | 0          | -43.11600574 |
| chr9 | 45936014 | 45936014 | + | 0          | 0          | -40.13317072 |
| chr9 | 45936077 | 45936077 | - | 0          | 0          | -39.72068565 |
| chr9 | 45936086 | 45936086 | + | 0          | 0          | -38.9379688  |
| chr9 | 45936087 | 45936087 | - | 0          | 0          | -35.89237675 |
| chr9 | 45936119 | 45936119 | + | 0          | 0          | -32.09889594 |
| chr9 | 45936120 | 45936120 | - | 0          | 0          | -29.48780931 |
| chr9 | 45936131 | 45936131 | + | 0          | 0          | -37.38104791 |
| chr9 | 45936132 | 45936132 | - | 0          | 0          | -28.27747082 |
| chr9 | 45936136 | 45936136 | + | 0          | 0          | -38.66178052 |
| chr9 | 45936137 | 45936137 | - | 0          | 0          | -29.28718325 |
| chr9 | 45936149 | 45936149 | - | 0          | 0          | -34.1154246  |
| chr9 | 45936152 | 45936152 | + | 0          | 0          | -30.57954088 |
| chr9 | 45936201 | 45936201 | - | 0          | 0          | -34.86338811 |



|      |          |          |   |            |            |              |
|------|----------|----------|---|------------|------------|--------------|
| chr9 | 45994243 | 45994243 | - | 2.44E-05   | 0.00036714 | -26.65804783 |
| chr9 | 46015978 | 46015978 | + | 3.39E-07   | 7.61E-06   | -29.68709257 |
| chr9 | 46083931 | 46083931 | + | 1.64E-11   | 6.66E-10   | -47.25643897 |
| chr9 | 46328731 | 46328731 | + | 1.11E-07   | 2.70E-06   | -27.93103448 |
| chr9 | 46328742 | 46328742 | + | 5.37E-12   | 2.30E-10   | -36.31891493 |
| chr9 | 46328753 | 46328753 | + | 2.22E-16   | 1.43E-14   | -37.78418075 |
| chr9 | 46329921 | 46329921 | - | 2.13E-06   | 4.10E-05   | -26.12676056 |
| chr9 | 46334776 | 46334776 | - | 0          | 0          | -25.2552757  |
| chr9 | 47363224 | 47363224 | + | 0.00061461 | 0.00590935 | -25.33333333 |
| chr9 | 48647921 | 48647921 | + | 0          | 0          | -25.35513312 |
| chr9 | 48647987 | 48647987 | - | 0          | 0          | -26.59631421 |
| chr9 | 48674531 | 48674531 | + | 0          | 0          | -27.95839736 |
| chr9 | 48674538 | 48674538 | + | 0          | 0          | -32.55220623 |
| chr9 | 48674572 | 48674572 | + | 0          | 0          | -27.17435807 |
| chr9 | 48674641 | 48674641 | - | 0          | 0          | -31.63854243 |
| chr9 | 48674646 | 48674646 | - | 0          | 0          | -26.23595454 |
| chr9 | 48675251 | 48675251 | + | 2.50E-08   | 6.76E-07   | -25.29926649 |
| chr9 | 48675485 | 48675485 | - | 3.24E-10   | 1.13E-08   | -37.96156086 |
| chr9 | 48728355 | 48728355 | + | 0          | 0          | -28.54902846 |
| chr9 | 48728395 | 48728395 | + | 0          | 0          | -33.22294312 |
| chr9 | 48728551 | 48728551 | - | 0          | 0          | -44.21659634 |
| chr9 | 48823134 | 48823134 | + | 0.00042894 | 0.00437257 | -28.0952381  |
| chr9 | 48823145 | 48823145 | + | 0          | 0          | -36.75131622 |
| chr9 | 48823151 | 48823151 | + | 0          | 0          | -36.20581722 |
| chr9 | 48823164 | 48823164 | + | 0          | 0          | -33.27729735 |
| chr9 | 48860195 | 48860195 | + | 1.71E-09   | 5.46E-08   | -29.97896213 |
| chr9 | 48860398 | 48860398 | + | 0          | 0          | -27.22752035 |
| chr9 | 48860399 | 48860399 | - | 0          | 0          | -30.9092721  |
| chr9 | 50333806 | 50333806 | + | 1.73E-05   | 0.00026939 | -27.35799107 |
| chr9 | 50442807 | 50442807 | + | 8.14E-12   | 3.42E-10   | -28.50020094 |
| chr9 | 50478986 | 50478986 | - | 1.15E-06   | 2.34E-05   | -38.4045584  |
| chr9 | 50486752 | 50486752 | + | 3.95E-13   | 1.90E-11   | -26.20570764 |
| chr9 | 50746068 | 50746068 | + | 1.11E-16   | 7.26E-15   | -33.52232459 |
| chr9 | 50884425 | 50884425 | - | 1.90E-05   | 0.00029316 | -27.65538946 |
| chr9 | 50970550 | 50970550 | + | 4.55E-06   | 8.15E-05   | -26.62856017 |
| chr9 | 51279414 | 51279414 | - | 0          | 0          | -30.38026089 |
| chr9 | 51279422 | 51279422 | - | 0          | 0          | -31.5292507  |
| chr9 | 51279428 | 51279428 | - | 0          | 0          | -33.61259138 |
| chr9 | 51279430 | 51279430 | - | 0          | 0          | -32.28153141 |
| chr9 | 51293420 | 51293420 | + | 4.69E-10   | 1.61E-08   | -25.19653457 |
| chr9 | 52093456 | 52093456 | + | 9.40E-08   | 2.32E-06   | -26.54220779 |

|      |          |          |   |            |            |              |
|------|----------|----------|---|------------|------------|--------------|
| chr9 | 52680063 | 52680063 | - | 9.78E-06   | 0.00016214 | -29.26977688 |
| chr9 | 54503040 | 54503040 | + | 1.60E-06   | 3.16E-05   | -27.35022496 |
| chr9 | 54503084 | 54503084 | + | 5.11E-10   | 1.75E-08   | -44.16729655 |
| chr9 | 54970475 | 54970475 | - | 0          | 0          | -28.36999065 |
| chr9 | 55044464 | 55044464 | - | 0          | 0          | -31.0619443  |
| chr9 | 55369547 | 55369547 | - | 0.00092734 | 0.00830111 | -30.43478261 |
| chr9 | 55430028 | 55430028 | + | 0.00015456 | 0.00183658 | -30.11413521 |
| chr9 | 55430213 | 55430213 | + | 0          | 0          | -28.95622896 |
| chr9 | 55430214 | 55430214 | - | 2.44E-10   | 8.68E-09   | -41.87850467 |
| chr9 | 55430285 | 55430285 | - | 0          | 0          | -31.78266896 |
| chr9 | 56118826 | 56118826 | - | 5.49E-09   | 1.64E-07   | -40.29289912 |
| chr9 | 56141908 | 56141908 | + | 0          | 0          | -26.92457857 |
| chr9 | 56498071 | 56498071 | + | 6.65E-07   | 1.41E-05   | -35.92544051 |
| chr9 | 56564372 | 56564372 | + | 0          | 0          | -25.67067085 |
| chr9 | 56592910 | 56592910 | - | 0          | 0          | -25.52536509 |
| chr9 | 56865157 | 56865157 | - | 0          | 0          | -32.11729599 |
| chr9 | 56882301 | 56882301 | + | 4.77E-15   | 2.75E-13   | -28.90695715 |
| chr9 | 56897761 | 56897761 | - | 0          | 0          | -47.66230424 |
| chr9 | 56897794 | 56897794 | - | 0          | 0          | -44.13351905 |
| chr9 | 56897809 | 56897809 | - | 0          | 0          | -40.84971985 |
| chr9 | 57278851 | 57278851 | + | 4.37E-06   | 7.86E-05   | -32.94736842 |
| chr9 | 57278893 | 57278893 | + | 5.16E-05   | 0.00070938 | -28.99896801 |
| chr9 | 57342908 | 57342908 | + | 9.82E-05   | 0.00124101 | -33.61702128 |
| chr9 | 57420458 | 57420458 | - | 9.21E-15   | 5.17E-13   | -32.07425102 |
| chr9 | 57631858 | 57631858 | + | 4.22E-09   | 1.28E-07   | -29.45057322 |
| chr9 | 57798987 | 57798987 | + | 0          | 0          | -32.5262654  |
| chr9 | 57798988 | 57798988 | - | 0          | 0          | -28.25603409 |
| chr9 | 57799026 | 57799026 | - | 0          | 0          | -31.46648673 |
| chr9 | 57799082 | 57799082 | - | 0          | 0          | -35.22657223 |
| chr9 | 57901248 | 57901248 | - | 1.47E-10   | 5.35E-09   | -25.5491162  |
| chr9 | 57950070 | 57950070 | + | 0          | 0          | -30.7865822  |
| chr9 | 57950079 | 57950079 | + | 0          | 0          | -28.15502463 |
| chr9 | 57950080 | 57950080 | - | 1.50E-14   | 8.25E-13   | -28.20368915 |
| chr9 | 57997713 | 57997713 | + | 0          | 0          | -35.78842199 |
| chr9 | 58112978 | 58112978 | + | 8.88E-16   | 5.45E-14   | -35.78313253 |
| chr9 | 58128712 | 58128712 | + | 4.19E-07   | 9.24E-06   | -29.57080734 |
| chr9 | 58311885 | 58311885 | + | 0          | 0          | -28.9458838  |
| chr9 | 58311886 | 58311886 | - | 0          | 0          | -28.84333475 |
| chr9 | 58311897 | 58311897 | - | 0          | 0          | -25.58953123 |
| chr9 | 58311908 | 58311908 | + | 0          | 0          | -25.40419128 |
| chr9 | 58311909 | 58311909 | - | 0          | 0          | -31.69677962 |

|      |          |          |   |            |            |              |
|------|----------|----------|---|------------|------------|--------------|
| chr9 | 58311921 | 58311921 | - | 0          | 0          | -32.82387215 |
| chr9 | 58311951 | 58311951 | + | 0          | 0          | -37.14285714 |
| chr9 | 58311952 | 58311952 | - | 0          | 0          | -34.22493007 |
| chr9 | 58312020 | 58312020 | + | 0          | 0          | -30.7139859  |
| chr9 | 58312157 | 58312157 | + | 0          | 0          | -25.04995645 |
| chr9 | 58477870 | 58477870 | + | 2.19E-08   | 5.98E-07   | -31.53396311 |
| chr9 | 58490156 | 58490156 | + | 0          | 0          | -25.24514668 |
| chr9 | 58490168 | 58490168 | + | 0          | 0          | -31.55191257 |
| chr9 | 58490180 | 58490180 | + | 0          | 0          | -39.06497399 |
| chr9 | 58490194 | 58490194 | + | 0          | 0          | -33.47439938 |
| chr9 | 58490202 | 58490202 | + | 0          | 0          | -34.87126799 |
| chr9 | 58490221 | 58490221 | - | 0          | 0          | -34.52978056 |
| chr9 | 58490227 | 58490227 | - | 0          | 0          | -27.14849646 |
| chr9 | 58490247 | 58490247 | - | 0          | 0          | -26.78510444 |
| chr9 | 58490257 | 58490257 | - | 0          | 0          | -44.12156954 |
| chr9 | 58554254 | 58554254 | - | 1.02E-07   | 2.49E-06   | -27.31891764 |
| chr9 | 59680713 | 59680713 | - | 0          | 0          | -28.1190629  |
| chr9 | 59680724 | 59680724 | - | 0          | 0          | -27.99266706 |
| chr9 | 60602241 | 60602241 | - | 0          | 0          | -25.15671642 |
| chr9 | 60740748 | 60740748 | - | 0          | 0          | -27.61424175 |
| chr9 | 60743110 | 60743110 | - | 2.73E-07   | 6.23E-06   | -27.17391304 |
| chr9 | 60743132 | 60743132 | - | 4.91E-07   | 1.07E-05   | -32.2327044  |
| chr9 | 60940424 | 60940424 | + | 0          | 0          | -27.86553508 |
| chr9 | 60940476 | 60940476 | - | 0          | 0          | -27.51140904 |
| chr9 | 60990160 | 60990160 | - | 0          | 0          | -28.33170842 |
| chr9 | 60990172 | 60990172 | - | 0          | 0          | -26.90796604 |
| chr9 | 61000897 | 61000897 | + | 0          | 0          | -26.44153675 |
| chr9 | 61016516 | 61016516 | - | 0.00048635 | 0.00486053 | -26.63719259 |
| chr9 | 61064885 | 61064885 | + | 2.12E-09   | 6.70E-08   | -33.78834978 |
| chr9 | 61064904 | 61064904 | + | 8.79E-14   | 4.51E-12   | -38.33938294 |
| chr9 | 61366247 | 61366247 | - | 2.42E-05   | 0.00036435 | -34.04876374 |
| chr9 | 61368656 | 61368656 | - | 0          | 0          | -35.43542293 |
| chr9 | 61393362 | 61393362 | + | 0          | 0          | -25.97188402 |
| chr9 | 61509885 | 61509885 | + | 4.69E-07   | 1.03E-05   | -26.14474146 |
| chr9 | 61510083 | 61510083 | + | 0          | 0          | -31.32435231 |
| chr9 | 61510111 | 61510111 | + | 0          | 0          | -32.8208273  |
| chr9 | 61510113 | 61510113 | + | 9.27E-14   | 4.74E-12   | -25.95691808 |
| chr9 | 61533477 | 61533477 | + | 1.56E-11   | 6.36E-10   | -36.74544633 |
| chr9 | 61596802 | 61596802 | + | 3.83E-11   | 1.50E-09   | -26.08749382 |
| chr9 | 61877813 | 61877813 | + | 0          | 0          | -36.99312515 |
| chr9 | 61877872 | 61877872 | - | 0          | 0          | -31.06325766 |

|      |          |          |   |            |            |              |
|------|----------|----------|---|------------|------------|--------------|
| chr9 | 61877892 | 61877892 | - | 0          | 0          | -47.13823291 |
| chr9 | 61877909 | 61877909 | - | 0          | 0          | -48.27993175 |
| chr9 | 61886108 | 61886108 | - | 0          | 0          | -25.06365917 |
| chr9 | 62018689 | 62018689 | + | 2.42E-11   | 9.65E-10   | -27.58755625 |
| chr9 | 62018806 | 62018806 | + | 0          | 0          | -28.68463139 |
| chr9 | 62349645 | 62349645 | + | 6.57E-11   | 2.50E-09   | -26.43057223 |
| chr9 | 62364244 | 62364244 | + | 0.00085611 | 0.00777342 | -25.62804284 |
| chr9 | 62368063 | 62368063 | + | 0          | 0          | -26.32960622 |
| chr9 | 62368249 | 62368249 | - | 7.45E-11   | 2.81E-09   | -29.93013765 |
| chr9 | 62521518 | 62521518 | + | 1.13E-09   | 3.69E-08   | -25.82951945 |
| chr9 | 62522463 | 62522463 | + | 0          | 0          | -35.21294407 |
| chr9 | 62523024 | 62523024 | - | 1.89E-08   | 5.21E-07   | -27.21464465 |
| chr9 | 62614123 | 62614123 | - | 5.34E-13   | 2.53E-11   | -27.94507724 |
| chr9 | 62767420 | 62767420 | + | 3.78E-05   | 0.0005392  | -34.28872497 |
| chr9 | 63131736 | 63131736 | - | 0          | 0          | -26.71325284 |
| chr9 | 63187520 | 63187520 | + | 5.26E-08   | 1.35E-06   | -34.94265631 |
| chr9 | 63200781 | 63200781 | + | 0          | 0          | -30.44719041 |
| chr9 | 63241880 | 63241880 | + | 9.21E-08   | 2.28E-06   | -28.9719209  |
| chr9 | 63723543 | 63723543 | + | 0          | 0          | -29.99256116 |
| chr9 | 63723544 | 63723544 | - | 0          | 0          | -25.60720491 |
| chr9 | 63723546 | 63723546 | + | 0          | 0          | -25.59457058 |
| chr9 | 63723576 | 63723576 | + | 0          | 0          | -55.1300501  |
| chr9 | 63723590 | 63723590 | + | 0          | 0          | -35.53424625 |
| chr9 | 63726264 | 63726264 | - | 1.55E-06   | 3.06E-05   | -27.13326071 |
| chr9 | 63744146 | 63744146 | - | 1.82E-07   | 4.29E-06   | -28.78509578 |
| chr9 | 63803499 | 63803499 | + | 0          | 0          | -34.18327321 |
| chr9 | 63803500 | 63803500 | - | 0          | 0          | -30.56670036 |
| chr9 | 63803517 | 63803517 | - | 0          | 0          | -34.99467376 |
| chr9 | 63877033 | 63877033 | + | 0          | 0          | -25.08145998 |
| chr9 | 63927720 | 63927720 | + | 0          | 0          | -36.38756108 |
| chr9 | 63927721 | 63927721 | - | 0          | 0          | -33.16949291 |
| chr9 | 63927768 | 63927768 | + | 2.22E-16   | 1.43E-14   | -31.22681084 |
| chr9 | 63957845 | 63957845 | - | 0          | 0          | -26.64172814 |
| chr9 | 63959476 | 63959476 | + | 1.33E-08   | 3.74E-07   | -31.24161074 |
| chr9 | 63965788 | 63965788 | + | 5.56E-06   | 9.77E-05   | -26.08636487 |
| chr9 | 63965996 | 63965996 | - | 0          | 0          | -35.41915726 |
| chr9 | 63970435 | 63970435 | + | 0          | 0          | -34.3437333  |
| chr9 | 63970459 | 63970459 | + | 0          | 0          | -32.5555671  |
| chr9 | 63970460 | 63970460 | - | 2.22E-16   | 1.43E-14   | -25.0499232  |
| chr9 | 63970495 | 63970495 | - | 0          | 0          | -28.19993637 |
| chr9 | 63970499 | 63970499 | + | 4.31E-14   | 2.27E-12   | -35.21790342 |

|      |          |          |   |            |            |              |
|------|----------|----------|---|------------|------------|--------------|
| chr9 | 63970500 | 63970500 | - | 0          | 0          | -31.46451033 |
| chr9 | 63970505 | 63970505 | + | 0          | 0          | -47.62974099 |
| chr9 | 63973698 | 63973698 | + | 0          | 0          | -27.21203659 |
| chr9 | 63973699 | 63973699 | - | 0          | 0          | -26.45125331 |
| chr9 | 63973732 | 63973732 | + | 0          | 0          | -32.10824646 |
| chr9 | 63973733 | 63973733 | - | 0          | 0          | -25.63785444 |
| chr9 | 63973896 | 63973896 | - | 9.35E-10   | 3.10E-08   | -38.2740448  |
| chr9 | 63980651 | 63980651 | - | 0          | 0          | -32.47390459 |
| chr9 | 63998142 | 63998142 | - | 0.00021398 | 0.00242758 | -27.16836735 |
| chr9 | 64017453 | 64017453 | - | 0          | 0          | -27.89257146 |
| chr9 | 64045428 | 64045428 | - | 0          | 0          | -35.47107083 |
| chr9 | 64045715 | 64045715 | - | 1.17E-11   | 4.83E-10   | -26.53773838 |
| chr9 | 64048638 | 64048638 | - | 0          | 0          | -26.81047304 |
| chr9 | 64049725 | 64049725 | + | 2.07E-07   | 4.83E-06   | -32.12341198 |
| chr9 | 64066940 | 64066940 | + | 0          | 0          | -26.8499729  |
| chr9 | 64066947 | 64066947 | + | 0          | 0          | -35.42057243 |
| chr9 | 64067023 | 64067023 | - | 9.08E-07   | 1.88E-05   | -29.36078007 |
| chr9 | 64085099 | 64085099 | - | 0          | 0          | -29.56420216 |
| chr9 | 64085250 | 64085250 | - | 3.11E-08   | 8.30E-07   | -26.08997937 |
| chr9 | 64457687 | 64457687 | - | 1.88E-07   | 4.41E-06   | -28.32722833 |
| chr9 | 64617566 | 64617566 | - | 0.00011835 | 0.00145793 | -54.61538462 |
| chr9 | 64918723 | 64918723 | - | 8.38E-10   | 2.79E-08   | -35.97296395 |
| chr9 | 64918745 | 64918745 | - | 3.10E-08   | 8.27E-07   | -36.10619469 |
| chr9 | 64960410 | 64960410 | + | 0          | 0          | -27.0907126  |
| chr9 | 65102867 | 65102867 | + | 0          | 0          | -26.08448672 |
| chr9 | 65102875 | 65102875 | + | 0          | 0          | -33.41766424 |
| chr9 | 65102876 | 65102876 | - | 0          | 0          | -37.16165158 |
| chr9 | 65102885 | 65102885 | + | 2.77E-07   | 6.32E-06   | -30.45839958 |
| chr9 | 65102886 | 65102886 | - | 0          | 0          | -30.68094828 |
| chr9 | 65102902 | 65102902 | + | 0          | 0          | -45.71428571 |
| chr9 | 65102904 | 65102904 | + | 1.62E-08   | 4.52E-07   | -37.64090177 |
| chr9 | 65102907 | 65102907 | + | 7.49E-10   | 2.51E-08   | -40.23809524 |
| chr9 | 65103067 | 65103067 | - | 1.78E-12   | 8.02E-11   | -26.04038855 |
| chr9 | 65520205 | 65520205 | + | 0          | 0          | -30.47545651 |
| chr9 | 65520219 | 65520219 | + | 0          | 0          | -39.32812084 |
| chr9 | 65520235 | 65520235 | + | 0          | 0          | -39.33744373 |
| chr9 | 65520244 | 65520244 | + | 0          | 0          | -29.92331102 |
| chr9 | 65520329 | 65520329 | - | 0          | 0          | -37.65215861 |
| chr9 | 65520337 | 65520337 | - | 0          | 0          | -34.66829294 |
| chr9 | 65529823 | 65529823 | + | 0          | 0          | -30.13942687 |
| chr9 | 65529908 | 65529908 | - | 6.03E-10   | 2.04E-08   | -29.71729126 |

|      |          |          |   |            |            |              |
|------|----------|----------|---|------------|------------|--------------|
| chr9 | 65533256 | 65533256 | + | 3.75E-07   | 8.36E-06   | -45.59748428 |
| chr9 | 65546313 | 65546313 | - | 1.09E-09   | 3.59E-08   | -33.12101911 |
| chr9 | 65631230 | 65631230 | - | 0          | 0          | -26.78560245 |
| chr9 | 66078615 | 66078615 | + | 6.33E-15   | 3.61E-13   | -27.55278643 |
| chr9 | 66078616 | 66078616 | - | 0          | 0          | -27.54299331 |
| chr9 | 66088637 | 66088637 | + | 1.88E-06   | 3.67E-05   | -25.5952381  |
| chr9 | 66218525 | 66218525 | + | 0.00103792 | 0.00910491 | -26.61370407 |
| chr9 | 66514375 | 66514375 | + | 0          | 0          | -30.35600472 |
| chr9 | 66514400 | 66514400 | + | 0          | 0          | -30.95172683 |
| chr9 | 66514454 | 66514454 | - | 0          | 0          | -28.10308946 |
| chr9 | 66856004 | 66856004 | + | 0          | 0          | -33.26979833 |
| chr9 | 66856041 | 66856041 | + | 0          | 0          | -47.16999098 |
| chr9 | 66856042 | 66856042 | - | 0          | 0          | -41.3377353  |
| chr9 | 66856048 | 66856048 | + | 0          | 0          | -34.64153324 |
| chr9 | 66856049 | 66856049 | - | 0          | 0          | -39.13459312 |
| chr9 | 67870232 | 67870232 | + | 8.20E-08   | 2.05E-06   | -42.39744535 |
| chr9 | 69111890 | 69111890 | + | 0.00012302 | 0.00150785 | -25.02913753 |
| chr9 | 69259600 | 69259600 | + | 0          | 0          | -27.38278065 |
| chr9 | 69259611 | 69259611 | + | 0          | 0          | -25.91852898 |
| chr9 | 69259612 | 69259612 | - | 0          | 0          | -25.67913424 |
| chr9 | 69714245 | 69714245 | + | 0.00099943 | 0.00882686 | -25.80901857 |
| chr9 | 69714247 | 69714247 | + | 6.97E-05   | 0.00092219 | -33.46590909 |
| chr9 | 69714261 | 69714261 | + | 1.81E-05   | 0.00028132 | -38.3497807  |
| chr9 | 70112193 | 70112193 | - | 0.00020718 | 0.00236128 | -34.60011344 |
| chr9 | 70208829 | 70208829 | - | 2.96E-07   | 6.71E-06   | -29.81084733 |
| chr9 | 70208834 | 70208834 | - | 4.90E-13   | 2.33E-11   | -42.07225167 |
| chr9 | 70208838 | 70208838 | - | 6.90E-09   | 2.03E-07   | -33.90984811 |
| chr9 | 70832391 | 70832391 | + | 0          | 0          | -31.82283345 |
| chr9 | 71400312 | 71400312 | + | 6.74E-11   | 2.56E-09   | -26.47665402 |
| chr9 | 71400313 | 71400313 | - | 6.34E-10   | 2.14E-08   | -27.46283926 |
| chr9 | 72155268 | 72155268 | + | 7.72E-12   | 3.25E-10   | -44.31724422 |
| chr9 | 72812809 | 72812809 | - | 1.88E-08   | 5.18E-07   | -43.26530612 |
| chr9 | 72812815 | 72812815 | - | 6.27E-10   | 2.12E-08   | -41.93733832 |
| chr9 | 72812859 | 72812859 | - | 1.73E-10   | 6.26E-09   | -36.97538768 |
| chr9 | 73026382 | 73026382 | + | 0          | 0          | -26.13431613 |
| chr9 | 73026383 | 73026383 | - | 0          | 0          | -30.35769135 |
| chr9 | 73026397 | 73026397 | + | 0          | 0          | -27.86960409 |
| chr9 | 73026419 | 73026419 | + | 0          | 0          | -42.11696269 |
| chr9 | 73026452 | 73026452 | - | 1.93E-08   | 5.32E-07   | -26.39840183 |
| chr9 | 73055397 | 73055397 | + | 0          | 0          | -28.51840304 |
| chr9 | 73094634 | 73094634 | - | 0          | 0          | -42.39245958 |

|      |           |           |   |            |            |              |
|------|-----------|-----------|---|------------|------------|--------------|
| chr9 | 73094665  | 73094665  | - | 1.93E-08   | 5.30E-07   | -26.42149929 |
| chr9 | 73968961  | 73968961  | - | 2.60E-12   | 1.15E-10   | -35.53254438 |
| chr9 | 73969043  | 73969043  | - | 0          | 0          | -25.51429628 |
| chr9 | 74985664  | 74985664  | - | 1.89E-15   | 1.13E-13   | -27.07732845 |
| chr9 | 75070803  | 75070803  | + | 5.55E-16   | 3.46E-14   | -27.25653207 |
| chr9 | 75261325  | 75261325  | - | 1.68E-06   | 3.30E-05   | -27.09533787 |
| chr9 | 75363868  | 75363868  | - | 0          | 0          | -27.31469269 |
| chr9 | 78428911  | 78428911  | + | 9.53E-07   | 1.97E-05   | -29.66101695 |
| chr9 | 78846219  | 78846219  | + | 5.72E-06   | 0.00010017 | -25.9840294  |
| chr9 | 79821135  | 79821135  | + | 1.18E-08   | 3.34E-07   | -27.75159997 |
| chr9 | 88361710  | 88361710  | - | 2.58E-05   | 0.00038557 | -30.41144902 |
| chr9 | 92808900  | 92808900  | - | 6.30E-05   | 0.00084469 | -29.88372093 |
| chr9 | 95328317  | 95328317  | + | 6.64E-07   | 1.41E-05   | -32.4639841  |
| chr9 | 96288043  | 96288043  | + | 0.00023539 | 0.00263363 | -30.76923077 |
| chr9 | 96437422  | 96437422  | + | 0          | 0          | -51.96296912 |
| chr9 | 96437441  | 96437441  | + | 0          | 0          | -52.22280203 |
| chr9 | 96437511  | 96437511  | - | 0          | 0          | -30.31403039 |
| chr9 | 96527247  | 96527247  | - | 0          | 0          | -25.58624283 |
| chr9 | 96527271  | 96527271  | - | 0          | 0          | -30.568316   |
| chr9 | 96527280  | 96527280  | - | 0          | 0          | -28.02761391 |
| chr9 | 96633181  | 96633181  | - | 3.53E-05   | 0.00050778 | -28.42714786 |
| chr9 | 96705188  | 96705188  | - | 1.51E-06   | 3.01E-05   | -28.69198312 |
| chr9 | 96801567  | 96801567  | - | 8.21E-06   | 0.00013856 | -39.40700809 |
| chr9 | 96827100  | 96827100  | + | 5.93E-05   | 0.00080069 | -35.60606061 |
| chr9 | 96979631  | 96979631  | + | 0          | 0          | -32.17418003 |
| chr9 | 96979632  | 96979632  | - | 0          | 0          | -26.83176313 |
| chr9 | 98318572  | 98318572  | - | 0          | 0          | -31.43855405 |
| chr9 | 98318583  | 98318583  | - | 0          | 0          | -31.40269766 |
| chr9 | 98498242  | 98498242  | + | 0          | 0          | -34.15459181 |
| chr9 | 98498243  | 98498243  | - | 0          | 0          | -32.2155803  |
| chr9 | 102326934 | 102326934 | + | 5.78E-06   | 0.00010124 | -25.14485344 |
| chr9 | 102409570 | 102409570 | - | 0.00032675 | 0.00347966 | 31.45896657  |
| chr9 | 102624784 | 102624784 | - | 0.00031302 | 0.00335639 | -40.35476718 |
| chr9 | 102643050 | 102643050 | + | 2.07E-07   | 4.83E-06   | -50.16118633 |
| chr9 | 102709880 | 102709880 | + | 0          | 0          | -25.54679952 |
| chr9 | 102709895 | 102709895 | + | 0          | 0          | -34.35575114 |
| chr9 | 102709939 | 102709939 | - | 0          | 0          | -33.01620305 |
| chr9 | 102710007 | 102710007 | + | 0          | 0          | -29.65083632 |
| chr9 | 102710008 | 102710008 | - | 0          | 0          | -28.20981503 |
| chr9 | 102710087 | 102710087 | - | 0          | 0          | -31.85833753 |
| chr9 | 102756459 | 102756459 | + | 7.01E-05   | 0.0009263  | -38.64642631 |

|      |           |           |   |            |            |              |
|------|-----------|-----------|---|------------|------------|--------------|
| chr9 | 102893501 | 102893501 | + | 4.09E-13   | 1.96E-11   | -30.62169312 |
| chr9 | 103057082 | 103057082 | - | 6.67E-09   | 1.96E-07   | -26.07396704 |
| chr9 | 103286972 | 103286972 | - | 6.12E-07   | 1.31E-05   | -29.9249531  |
| chr9 | 104088618 | 104088618 | - | 8.63E-14   | 4.42E-12   | -31.62708293 |
| chr9 | 106299291 | 106299291 | - | 3.31E-05   | 0.00047961 | -43          |
| chr9 | 106330813 | 106330813 | + | 2.16E-11   | 8.67E-10   | -27.55505364 |
| chr9 | 106330828 | 106330828 | + | 0          | 0          | -42.70967122 |
| chr9 | 106346366 | 106346366 | + | 0          | 0          | -27.66389322 |
| chr9 | 106353909 | 106353909 | - | 6.54E-07   | 1.39E-05   | -26.49873142 |
| chr9 | 106455409 | 106455409 | + | 2.10E-13   | 1.04E-11   | -49.79919679 |
| chr9 | 106455447 | 106455447 | + | 0          | 0          | -54.7976564  |
| chr9 | 106455448 | 106455448 | - | 0          | 0          | -50.3262609  |
| chr9 | 106455476 | 106455476 | + | 0          | 0          | -51.76636194 |
| chr9 | 106455568 | 106455568 | - | 0          | 0          | -38.39887479 |
| chr9 | 106455581 | 106455581 | - | 0          | 0          | -40.05840822 |
| chr9 | 106469634 | 106469634 | + | 4.77E-11   | 1.84E-09   | -25.99401749 |
| chr9 | 106647981 | 106647981 | + | 2.28E-06   | 4.36E-05   | -26.55819084 |
| chr9 | 106885504 | 106885504 | - | 0          | 0          | -28.84575729 |
| chr9 | 106885524 | 106885524 | - | 0          | 0          | -29.52094149 |
| chr9 | 106885532 | 106885532 | + | 6.03E-11   | 2.30E-09   | -35.85406302 |
| chr9 | 106885782 | 106885782 | - | 0.00035173 | 0.00370242 | -28.98601399 |
| chr9 | 106887697 | 106887697 | + | 1.04E-09   | 3.42E-08   | -26.38803277 |
| chr9 | 107308290 | 107308290 | + | 5.41E-12   | 2.31E-10   | -29.15049067 |
| chr9 | 107308483 | 107308483 | - | 2.63E-06   | 4.96E-05   | -25.0035791  |
| chr9 | 107334683 | 107334683 | + | 8.67E-07   | 1.80E-05   | -30.55171547 |
| chr9 | 107451622 | 107451622 | - | 0.00013363 | 0.00162007 | -33.00248139 |
| chr9 | 107479345 | 107479345 | + | 9.68E-06   | 0.00016082 | -40.20979021 |
| chr9 | 107479346 | 107479346 | - | 0          | 0          | -28.43588474 |
| chr9 | 107479523 | 107479523 | - | 2.25E-05   | 0.00034182 | -52.97766749 |
| chr9 | 107479566 | 107479566 | - | 2.62E-06   | 4.95E-05   | -58.87096774 |
| chr9 | 107512245 | 107512245 | - | 7.04E-05   | 0.00092983 | 40           |
| chr9 | 107527208 | 107527208 | + | 0          | 0          | -34.87869955 |
| chr9 | 107527233 | 107527233 | - | 0          | 0          | -31.5642572  |
| chr9 | 107527236 | 107527236 | - | 0          | 0          | -45.61483508 |
| chr9 | 107527252 | 107527252 | - | 0          | 0          | -32.19017337 |
| chr9 | 107527255 | 107527255 | - | 0          | 0          | -26.99629    |
| chr9 | 107527281 | 107527281 | - | 0          | 0          | -25.59373142 |
| chr9 | 107550703 | 107550703 | - | 7.08E-07   | 1.50E-05   | -26.6773376  |
| chr9 | 107606822 | 107606822 | - | 1.43E-12   | 6.49E-11   | -34.3537415  |
| chr9 | 107628592 | 107628592 | + | 0          | 0          | -33.63973411 |
| chr9 | 107629001 | 107629001 | - | 0          | 0          | -41.09626198 |



|      |           |           |   |            |            |              |
|------|-----------|-----------|---|------------|------------|--------------|
| chr9 | 107630198 | 107630198 | + | 0          | 0          | -36.68640679 |
| chr9 | 107630273 | 107630273 | - | 0          | 0          | -28.44495302 |
| chr9 | 107630277 | 107630277 | - | 0          | 0          | -41.18795646 |
| chr9 | 107657635 | 107657635 | + | 1.80E-11   | 7.29E-10   | -30.28858723 |
| chr9 | 107668304 | 107668304 | - | 0          | 0          | -28.6596017  |
| chr9 | 107668329 | 107668329 | - | 0          | 0          | -27.98469992 |
| chr9 | 107677420 | 107677420 | + | 7.84E-09   | 2.29E-07   | 29.08045977  |
| chr9 | 107723540 | 107723540 | - | 0          | 0          | -31.02747828 |
| chr9 | 107723777 | 107723777 | - | 4.08E-06   | 7.39E-05   | -29.39615129 |
| chr9 | 107735571 | 107735571 | - | 0          | 0          | -25.18382282 |
| chr9 | 107900215 | 107900215 | + | 0.00022104 | 0.00249526 | -26.2295082  |
| chr9 | 107901178 | 107901178 | + | 0          | 0          | -26.09342228 |
| chr9 | 107901179 | 107901179 | - | 0          | 0          | -26.49652849 |
| chr9 | 107901280 | 107901280 | - | 0          | 0          | -27.46825442 |
| chr9 | 107923242 | 107923242 | + | 1.33E-09   | 4.30E-08   | -30.55116363 |
| chr9 | 107923247 | 107923247 | + | 4.94E-13   | 2.35E-11   | -33.83796141 |
| chr9 | 108093991 | 108093991 | - | 9.54E-11   | 3.56E-09   | -30.23495189 |
| chr9 | 108106266 | 108106266 | + | 2.21E-09   | 6.97E-08   | -28.75816993 |
| chr9 | 108110360 | 108110360 | - | 0          | 0          | -26.17599351 |
| chr9 | 108115299 | 108115299 | - | 7.28E-08   | 1.83E-06   | -39.79427188 |
| chr9 | 108120032 | 108120032 | - | 0          | 0          | -28.35222397 |
| chr9 | 108160269 | 108160269 | + | 0          | 0          | -32.77468801 |
| chr9 | 108160281 | 108160281 | + | 0          | 0          | -34.92696583 |
| chr9 | 108160286 | 108160286 | + | 0          | 0          | -29.62294282 |
| chr9 | 108160409 | 108160409 | - | 0          | 0          | -25.42721519 |
| chr9 | 108197722 | 108197722 | - | 2.83E-12   | 1.25E-10   | -35.55053492 |
| chr9 | 108297257 | 108297257 | + | 3.82E-08   | 1.00E-06   | -25.62436764 |
| chr9 | 108574018 | 108574018 | + | 0          | 0          | -30.22586697 |
| chr9 | 108587789 | 108587789 | - | 5.06E-06   | 8.98E-05   | -30.34177215 |
| chr9 | 108596829 | 108596829 | - | 0          | 0          | -27.69540219 |
| chr9 | 108662857 | 108662857 | - | 4.28E-13   | 2.05E-11   | -25.93389058 |
| chr9 | 108988206 | 108988206 | - | 0          | 0          | -32.98661996 |
| chr9 | 108988212 | 108988212 | - | 2.22E-16   | 1.43E-14   | -32.07688529 |
| chr9 | 109100287 | 109100287 | - | 0          | 0          | -31.61277036 |
| chr9 | 110625043 | 110625043 | - | 0          | 0          | -25.01159162 |
| chr9 | 110625092 | 110625092 | + | 0          | 0          | -34.39984806 |
| chr9 | 110625109 | 110625109 | + | 0          | 0          | -37.56288213 |
| chr9 | 110625129 | 110625129 | + | 3.28E-14   | 1.75E-12   | -30.16049599 |
| chr9 | 110625136 | 110625136 | + | 0          | 0          | -40.80601761 |
| chr9 | 110625256 | 110625256 | - | 6.28E-08   | 1.60E-06   | -29.58350515 |
| chr9 | 110625302 | 110625302 | - | 1.58E-12   | 7.13E-11   | -43.12479635 |

|      |           |           |   |            |            |              |
|------|-----------|-----------|---|------------|------------|--------------|
| chr9 | 110625346 | 110625346 | + | 7.12E-12   | 3.01E-10   | -27.43048804 |
| chr9 | 110635578 | 110635578 | - | 2.18E-05   | 0.00033234 | -40.29322548 |
| chr9 | 110643749 | 110643749 | + | 5.54E-11   | 2.12E-09   | -30.94213589 |
| chr9 | 110666559 | 110666559 | + | 0          | 0          | -25.38994165 |
| chr9 | 110666560 | 110666560 | - | 0          | 0          | -29.13430879 |
| chr9 | 110684608 | 110684608 | + | 0          | 0          | -26.01340307 |
| chr9 | 110684690 | 110684690 | - | 0          | 0          | -31.48592684 |
| chr9 | 110726002 | 110726002 | - | 4.88E-06   | 8.68E-05   | -26.99360341 |
| chr9 | 110726012 | 110726012 | - | 5.33E-05   | 0.00073008 | -26.00170503 |
| chr9 | 110726027 | 110726027 | + | 0.00011027 | 0.00137136 | -26.02712603 |
| chr9 | 110857705 | 110857705 | + | 8.52E-07   | 1.78E-05   | -54.54545455 |
| chr9 | 110857727 | 110857727 | + | 0.00017752 | 0.00206921 | -47.13804714 |
| chr9 | 110858251 | 110858251 | + | 1.53E-10   | 5.59E-09   | -30.91369601 |
| chr9 | 110864425 | 110864425 | + | 1.11E-16   | 7.26E-15   | -25.13818888 |
| chr9 | 110873769 | 110873769 | + | 0          | 0          | -28.00966686 |
| chr9 | 110873844 | 110873844 | - | 0          | 0          | -25.84138842 |
| chr9 | 110873854 | 110873854 | - | 0          | 0          | -30.5153521  |
| chr9 | 110873864 | 110873864 | - | 0          | 0          | -29.74492546 |
| chr9 | 110873869 | 110873869 | - | 0          | 0          | -26.39311308 |
| chr9 | 110873886 | 110873886 | - | 0          | 0          | -27.32022688 |
| chr9 | 110873900 | 110873900 | - | 0.00013133 | 0.00159587 | -32          |
| chr9 | 110873906 | 110873906 | + | 0          | 0          | -30.10692783 |
| chr9 | 110873907 | 110873907 | - | 6.11E-06   | 0.00010631 | -38.68686869 |
| chr9 | 110873911 | 110873911 | - | 9.30E-05   | 0.00118409 | -33.05555556 |
| chr9 | 110874045 | 110874045 | - | 0          | 0          | -26.67495672 |
| chr9 | 110879557 | 110879557 | + | 0          | 0          | -28.48112418 |
| chr9 | 110890249 | 110890249 | + | 0          | 0          | -33.65979193 |
| chr9 | 110890341 | 110890341 | - | 0          | 0          | -25.31718761 |
| chr9 | 110893696 | 110893696 | + | 2.42E-12   | 1.07E-10   | -55.25541126 |
| chr9 | 110893724 | 110893724 | + | 2.35E-10   | 8.37E-09   | -48.87763713 |
| chr9 | 110946608 | 110946608 | + | 1.11E-16   | 7.26E-15   | -33.72175141 |
| chr9 | 111055662 | 111055662 | - | 1.10E-11   | 4.55E-10   | -28.70072614 |
| chr9 | 111055682 | 111055682 | - | 2.84E-14   | 1.53E-12   | -28.48051501 |
| chr9 | 111088632 | 111088632 | - | 0          | 0          | -27.2015022  |
| chr9 | 111311383 | 111311383 | - | 0.00045902 | 0.00462971 | 28.07692308  |
| chr9 | 112187803 | 112187803 | - | 0          | 0          | -28.29056291 |
| chr9 | 112187806 | 112187806 | - | 0          | 0          | -39.96986179 |
| chr9 | 112187812 | 112187812 | - | 0          | 0          | -40.03615702 |
| chr9 | 114526268 | 114526268 | - | 0.00107626 | 0.00937679 | -32.50469043 |
| chr9 | 114559743 | 114559743 | + | 1.76E-05   | 0.00027383 | -38.92570631 |
| chr9 | 114584649 | 114584649 | + | 0          | 0          | -26.73151691 |

|      |           |           |   |            |            |              |
|------|-----------|-----------|---|------------|------------|--------------|
| chr9 | 114740594 | 114740594 | - | 0          | 0          | -41.0434604  |
| chr9 | 114740612 | 114740612 | - | 0          | 0          | -35.48489533 |
| chr9 | 114758208 | 114758208 | - | 1.12E-09   | 3.67E-08   | -25.16761217 |
| chr9 | 114795627 | 114795627 | - | 0          | 0          | -28.12951155 |
| chr9 | 115038294 | 115038294 | + | 0          | 0          | -45.54973822 |
| chr9 | 115038298 | 115038298 | + | 6.28E-14   | 3.27E-12   | -27.38238526 |
| chr9 | 115088821 | 115088821 | + | 0          | 0          | -31.8118996  |
| chr9 | 115306533 | 115306533 | - | 0          | 0          | -31.14825823 |
| chr9 | 115314900 | 115314900 | - | 0          | 0          | -32.53083422 |
| chr9 | 115543859 | 115543859 | - | 0          | 0          | -31.97848987 |
| chr9 | 115914148 | 115914148 | + | 4.55E-07   | 9.98E-06   | -34.27848101 |
| chr9 | 115914342 | 115914342 | - | 0          | 0          | -31.34058664 |
| chr9 | 116170107 | 116170107 | + | 1.54E-14   | 8.48E-13   | -33.65934066 |
| chr9 | 116228588 | 116228588 | - | 1.10E-08   | 3.13E-07   | -44.54660748 |
| chr9 | 116228638 | 116228638 | - | 9.75E-05   | 0.00123423 | -29.85098288 |
| chr9 | 116402067 | 116402067 | - | 0.00079992 | 0.00734907 | -28.66666667 |
| chr9 | 116762486 | 116762486 | - | 3.66E-15   | 2.14E-13   | -27.87708375 |
| chr9 | 118458182 | 118458182 | - | 1.57E-10   | 5.72E-09   | -32.01318578 |
| chr9 | 118458201 | 118458201 | - | 6.76E-14   | 3.50E-12   | -42.62017138 |
| chr9 | 118468314 | 118468314 | + | 0.00013647 | 0.00164946 | -29.35635793 |
| chr9 | 118468315 | 118468315 | - | 0          | 0          | -46.38608659 |
| chr9 | 118468350 | 118468350 | + | 2.95E-07   | 6.70E-06   | -35.34539474 |
| chr9 | 118468557 | 118468557 | - | 1.89E-06   | 3.68E-05   | -26.71568627 |
| chr9 | 118468573 | 118468573 | + | 0          | 0          | -28.4930432  |
| chr9 | 118468591 | 118468591 | + | 0          | 0          | -30.4552809  |
| chr9 | 118468592 | 118468592 | - | 0          | 0          | -32.81790815 |
| chr9 | 118468596 | 118468596 | + | 0          | 0          | -36.05547712 |
| chr9 | 118468597 | 118468597 | - | 0          | 0          | -35.07983919 |
| chr9 | 118479691 | 118479691 | - | 0          | 0          | -47.42401361 |
| chr9 | 118480426 | 118480426 | + | 8.96E-12   | 3.75E-10   | -45.93241552 |
| chr9 | 118498072 | 118498072 | + | 2.37E-10   | 8.45E-09   | -27.99032496 |
| chr9 | 118622648 | 118622648 | + | 4.27E-11   | 1.66E-09   | -36.85893391 |
| chr9 | 118689056 | 118689056 | + | 0          | 0          | -26.14743924 |
| chr9 | 118927988 | 118927988 | - | 9.75E-08   | 2.40E-06   | -38.80385488 |
| chr9 | 119146607 | 119146607 | + | 0          | 0          | 25.77875137  |
| chr9 | 119418197 | 119418197 | + | 0          | 0          | -28.71718708 |
| chr9 | 119477732 | 119477732 | - | 0          | 0          | -26.05534591 |
| chr9 | 119963074 | 119963074 | - | 1.67E-15   | 9.99E-14   | -32.35960145 |
| chr9 | 119963082 | 119963082 | + | 2.22E-16   | 1.43E-14   | -30.3572327  |
| chr9 | 119963083 | 119963083 | - | 2.56E-11   | 1.02E-09   | -31.8965733  |
| chr9 | 119963123 | 119963123 | + | 0          | 0          | -31.79328711 |

|      |           |           |   |            |            |              |
|------|-----------|-----------|---|------------|------------|--------------|
| chr9 | 119963308 | 119963308 | - | 1.49E-07   | 3.56E-06   | -28.04103373 |
| chr9 | 119984865 | 119984865 | + | 1.11E-15   | 6.76E-14   | -28.33547583 |
| chr9 | 120010912 | 120010912 | + | 6.48E-08   | 1.65E-06   | -29.53981502 |
| chr9 | 120024388 | 120024388 | + | 0.00064003 | 0.00611219 | -44.69496021 |
| chr9 | 120569505 | 120569505 | + | 7.69E-06   | 0.00013063 | -26.69753086 |
| chr9 | 120603218 | 120603218 | - | 0.00037165 | 0.00387922 | -32.78985507 |
| chr9 | 120619271 | 120619271 | + | 1.12E-12   | 5.15E-11   | -25.00442087 |
| chr9 | 120619640 | 120619640 | - | 1.64E-11   | 6.65E-10   | -26.14823307 |
| chr9 | 120814853 | 120814853 | - | 0          | 0          | -37.11004057 |
| chr9 | 120814878 | 120814878 | - | 0          | 0          | -33.11967546 |
| chr9 | 121330725 | 121330725 | + | 3.06E-07   | 6.93E-06   | -25.43072191 |
| chr9 | 121361678 | 121361678 | + | 0          | 0          | -25.22849631 |
| chr9 | 121372117 | 121372117 | - | 5.33E-15   | 3.06E-13   | -32.01715946 |
| chr9 | 121372127 | 121372127 | - | 6.15E-10   | 2.08E-08   | -25.14529124 |
| chr9 | 121372460 | 121372460 | + | 0          | 0          | -28.09894032 |
| chr9 | 121890851 | 121890851 | + | 4.44E-16   | 2.79E-14   | -26.99488106 |
| chr9 | 122199302 | 122199302 | - | 0          | 0          | -27.21163221 |
| chr9 | 123157023 | 123157023 | + | 0          | 0          | -29.13521616 |
| chr9 | 123157171 | 123157171 | - | 1.81E-14   | 9.88E-13   | -26.41350361 |
| chr9 | 123259444 | 123259444 | + | 1.16E-11   | 4.79E-10   | -25.0074664  |
| chr9 | 123478146 | 123478146 | - | 0          | 0          | -29.93244817 |
| chr9 | 124126054 | 124126054 | - | 0          | 0          | -27.74004926 |
| chrX | 7573547   | 7573547   | - | 8.04E-09   | 2.34E-07   | -25.74955335 |
| chrX | 7573550   | 7573550   | - | 6.17E-10   | 2.09E-08   | -26.59574468 |
| chrX | 7639333   | 7639333   | - | 0          | 0          | -27.62418674 |
| chrX | 7734079   | 7734079   | - | 1.20E-10   | 4.42E-09   | -38.42494715 |
| chrX | 7734096   | 7734096   | - | 6.63E-07   | 1.41E-05   | -33.54237436 |
| chrX | 7765200   | 7765200   | + | 1.85E-12   | 8.33E-11   | -26.35999842 |
| chrX | 7765249   | 7765249   | + | 5.93E-13   | 2.80E-11   | -28.32756212 |
| chrX | 7765290   | 7765290   | - | 2.08E-09   | 6.59E-08   | -39.30262591 |
| chrX | 7765306   | 7765306   | + | 0          | 0          | -30.24344569 |
| chrX | 7765307   | 7765307   | - | 1.06E-06   | 2.16E-05   | -30.53375196 |
| chrX | 7765323   | 7765323   | + | 0          | 0          | -32.87844079 |
| chrX | 7765464   | 7765464   | + | 2.34E-11   | 9.33E-10   | -64.15711948 |
| chrX | 7765525   | 7765525   | - | 0          | 0          | -37.16395853 |
| chrX | 7823045   | 7823045   | - | 7.34E-14   | 3.79E-12   | -38.73062421 |
| chrX | 7923251   | 7923251   | - | 9.33E-13   | 4.32E-11   | -25.22841144 |
| chrX | 7928510   | 7928510   | - | 2.60E-08   | 7.02E-07   | -36.25840179 |
| chrX | 8219771   | 8219771   | + | 1.37E-07   | 3.29E-06   | -26.23138603 |
| chrX | 8219905   | 8219905   | + | 1.52E-06   | 3.02E-05   | -42.35109718 |
| chrX | 8219906   | 8219906   | - | 0          | 0          | -30.49414979 |

|      |          |          |   |            |            |              |
|------|----------|----------|---|------------|------------|--------------|
| chrX | 8220096  | 8220096  | - | 1.22E-12   | 5.59E-11   | -27.6884609  |
| chrX | 8892038  | 8892038  | - | 1.82E-11   | 7.35E-10   | -60.47420532 |
| chrX | 8991494  | 8991494  | + | 1.27E-05   | 0.00020505 | -28.13457695 |
| chrX | 9200166  | 9200166  | + | 5.07E-06   | 8.99E-05   | -38.46153846 |
| chrX | 9200209  | 9200209  | + | 0.00027738 | 0.00303035 | -29.14979757 |
| chrX | 9247278  | 9247278  | + | 1.22E-15   | 7.41E-14   | -27.73011719 |
| chrX | 10992104 | 10992104 | - | 1.16E-05   | 0.00018927 | -30.61062649 |
| chrX | 11140307 | 11140307 | - | 1.31E-09   | 4.24E-08   | -37.69664786 |
| chrX | 11492177 | 11492177 | - | 1.04E-06   | 2.13E-05   | -34.69764012 |
| chrX | 11492342 | 11492342 | - | 0          | 0          | -26.86341406 |
| chrX | 11492347 | 11492347 | + | 8.07E-08   | 2.02E-06   | -31.67115903 |
| chrX | 11492348 | 11492348 | - | 3.61E-09   | 1.11E-07   | -35.53180832 |
| chrX | 11492361 | 11492361 | + | 2.47E-05   | 0.00037012 | -25.11258024 |
| chrX | 11492362 | 11492362 | - | 2.10E-07   | 4.90E-06   | -31.33984726 |
| chrX | 11492366 | 11492366 | + | 9.72E-08   | 2.39E-06   | -28.94341997 |
| chrX | 11492367 | 11492367 | - | 2.22E-08   | 6.05E-07   | -30.21929825 |
| chrX | 11492373 | 11492373 | - | 1.31E-07   | 3.17E-06   | -28.63738739 |
| chrX | 11550636 | 11550636 | - | 6.92E-06   | 0.00011889 | -26.71990172 |
| chrX | 11632335 | 11632335 | - | 6.81E-08   | 1.72E-06   | -25.09572901 |
| chrX | 11708268 | 11708268 | + | 3.28E-06   | 6.06E-05   | -31.9047619  |
| chrX | 11735267 | 11735267 | + | 0          | 0          | -30.56688508 |
| chrX | 11826929 | 11826929 | + | 0          | 0          | -26.67909868 |
| chrX | 11826947 | 11826947 | + | 0          | 0          | -35.51708541 |
| chrX | 11826948 | 11826948 | - | 0          | 0          | -28.73896767 |
| chrX | 11826981 | 11826981 | - | 0          | 0          | -30.00549576 |
| chrX | 11826995 | 11826995 | + | 0          | 0          | -36.70952163 |
| chrX | 11826996 | 11826996 | - | 0          | 0          | -33.68122665 |
| chrX | 11827000 | 11827000 | + | 0          | 0          | -32.31354603 |
| chrX | 11827094 | 11827094 | - | 4.46E-14   | 2.35E-12   | -28.47604085 |
| chrX | 11827105 | 11827105 | - | 0          | 0          | -39.07600157 |
| chrX | 11887784 | 11887784 | + | 1.91E-08   | 5.26E-07   | -31.67791273 |
| chrX | 11998495 | 11998495 | + | 3.33E-16   | 2.11E-14   | -26.55288146 |
| chrX | 11998501 | 11998501 | + | 0          | 0          | -29.18161723 |
| chrX | 11998503 | 11998503 | + | 0          | 0          | -31.685053   |
| chrX | 11998504 | 11998504 | - | 0          | 0          | -25.29245815 |
| chrX | 11998513 | 11998513 | + | 0          | 0          | -30.75502871 |
| chrX | 12000346 | 12000346 | + | 2.16E-05   | 0.00032853 | 38.51976451  |
| chrX | 12008005 | 12008005 | + | 3.72E-05   | 0.00053155 | -38.1127451  |
| chrX | 12137978 | 12137978 | - | 1.04E-11   | 4.32E-10   | -26.54778149 |
| chrX | 12138223 | 12138223 | - | 2.65E-08   | 7.14E-07   | 31.59890957  |
| chrX | 12140040 | 12140040 | + | 0          | 0          | -25.89649157 |

|      |          |          |   |            |            |              |
|------|----------|----------|---|------------|------------|--------------|
| chrX | 12152544 | 12152544 | + | 0          | 0          | -35.01517376 |
| chrX | 12152545 | 12152545 | - | 0          | 0          | -42.31580623 |
| chrX | 12152572 | 12152572 | - | 0          | 0          | -46.76603074 |
| chrX | 12152582 | 12152582 | + | 0          | 0          | -44.20372198 |
| chrX | 12152596 | 12152596 | + | 0          | 0          | -43.28427914 |
| chrX | 12152597 | 12152597 | - | 0          | 0          | -38.9301571  |
| chrX | 12152607 | 12152607 | + | 0          | 0          | -41.37942066 |
| chrX | 12152608 | 12152608 | - | 0          | 0          | -38.16548026 |
| chrX | 12152615 | 12152615 | + | 0          | 0          | -46.33535081 |
| chrX | 12152616 | 12152616 | - | 0          | 0          | -36.74848935 |
| chrX | 12152629 | 12152629 | - | 0          | 0          | -27.87340208 |
| chrX | 12154910 | 12154910 | + | 0          | 0          | -30.68931649 |
| chrX | 12154964 | 12154964 | + | 0          | 0          | -32.85543608 |
| chrX | 12155008 | 12155008 | + | 0          | 0          | -25.09943711 |
| chrX | 12155009 | 12155009 | - | 0          | 0          | -26.6786633  |
| chrX | 12155308 | 12155308 | - | 0          | 0          | -25.89110287 |
| chrX | 12260210 | 12260210 | + | 8.33E-09   | 2.42E-07   | -25.46045316 |
| chrX | 12286794 | 12286794 | + | 6.28E-05   | 0.00084247 | -37.61904762 |
| chrX | 12466639 | 12466639 | - | 0          | 0          | -29.99649578 |
| chrX | 12466808 | 12466808 | - | 1.93E-08   | 5.33E-07   | -32.7972028  |
| chrX | 12467495 | 12467495 | + | 0.00023047 | 0.00258647 | -27.33990148 |
| chrX | 12467550 | 12467550 | - | 6.31E-09   | 1.86E-07   | -47.96633941 |
| chrX | 12587823 | 12587823 | - | 8.36E-09   | 2.43E-07   | -27.22561786 |
| chrX | 13047634 | 13047634 | + | 0          | 0          | -29.88577023 |
| chrX | 13047683 | 13047683 | - | 4.63E-13   | 2.21E-11   | -27.26561889 |
| chrX | 13345272 | 13345272 | + | 8.29E-12   | 3.48E-10   | -54.38233264 |
| chrX | 13345277 | 13345277 | + | 5.57E-05   | 0.0007578  | -28.70018975 |
| chrX | 13486224 | 13486224 | + | 1.84E-12   | 8.28E-11   | -27.95068475 |
| chrX | 13486330 | 13486330 | - | 0          | 0          | -30.09056128 |
| chrX | 13486347 | 13486347 | - | 0          | 0          | -38.02819059 |
| chrX | 13486351 | 13486351 | - | 0          | 0          | -30.1152206  |
| chrX | 13486377 | 13486377 | + | 1.28E-14   | 7.07E-13   | -28.13311688 |
| chrX | 13486379 | 13486379 | + | 2.96E-14   | 1.59E-12   | -27.48158336 |
| chrX | 13486380 | 13486380 | - | 1.78E-11   | 7.20E-10   | -25.14872346 |
| chrX | 13486447 | 13486447 | + | 0          | 0          | -31.62390557 |
| chrX | 13486448 | 13486448 | - | 0          | 0          | -25.32078436 |
| chrX | 13486460 | 13486460 | + | 7.99E-15   | 4.51E-13   | -25.2162572  |
| chrX | 13486470 | 13486470 | + | 0          | 0          | -28.48623155 |
| chrX | 13486495 | 13486495 | + | 4.44E-16   | 2.79E-14   | -25.55353441 |
| chrX | 13486513 | 13486513 | - | 0          | 0          | -29.02500674 |
| chrX | 13486523 | 13486523 | - | 0          | 0          | -25.0420461  |

|      |          |          |   |            |            |              |
|------|----------|----------|---|------------|------------|--------------|
| chrX | 18402480 | 18402480 | - | 1.69E-05   | 0.00026477 | -30.86142322 |
| chrX | 20414658 | 20414658 | + | 8.68E-06   | 0.00014583 | -29.32731747 |
| chrX | 20862650 | 20862650 | - | 1.55E-07   | 3.69E-06   | -26.08094717 |
| chrX | 36808033 | 36808033 | - | 4.84E-05   | 0.00067086 | -32.14285714 |
| chrX | 36833846 | 36833846 | - | 0.00072967 | 0.0068112  | -26.81318681 |
| chrX | 36833854 | 36833854 | - | 3.49E-06   | 6.41E-05   | -36.996337   |
| chrX | 37052581 | 37052581 | - | 1.20E-07   | 2.92E-06   | -47.5862069  |
| chrX | 37484630 | 37484630 | - | 3.98E-06   | 7.22E-05   | -36.37387387 |
| chrX | 37832159 | 37832159 | + | 0.00016547 | 0.00194784 | -38.11111111 |
| chrX | 38485670 | 38485670 | + | 0          | 0          | -27.2580275  |
| chrX | 38486544 | 38486544 | - | 0          | 0          | -27.71485854 |
| chrX | 38641523 | 38641523 | - | 1.11E-16   | 7.26E-15   | -32.75701982 |
| chrX | 43844155 | 43844155 | - | 0.00049459 | 0.00492939 | -26.16780045 |
| chrX | 48033563 | 48033563 | - | 3.81E-05   | 0.00054298 | -30.55068836 |
| chrX | 48033682 | 48033682 | - | 4.61E-09   | 1.39E-07   | -25.05129142 |
| chrX | 48285983 | 48285983 | - | 0          | 0          | -25.02699839 |
| chrX | 48341467 | 48341467 | + | 3.53E-05   | 0.00050717 | -25.97402597 |
| chrX | 49288066 | 49288066 | + | 0.00069038 | 0.00650678 | -27.92553191 |
| chrX | 51018018 | 51018018 | - | 0.00019298 | 0.00222262 | -38.23529412 |
| chrX | 51018041 | 51018041 | - | 2.32E-05   | 0.00035097 | -40.78431373 |
| chrX | 51679915 | 51679915 | - | 1.25E-14   | 6.95E-13   | -27.69130372 |
| chrX | 52164334 | 52164334 | - | 0.00014361 | 0.00172404 | -28.57142857 |
| chrX | 52793109 | 52793109 | + | 7.53E-07   | 1.59E-05   | -35.93711619 |
| chrX | 52793140 | 52793140 | - | 2.88E-07   | 6.55E-06   | -38.7012987  |
| chrX | 53241275 | 53241275 | + | 1.76E-12   | 7.94E-11   | -25.6019656  |
| chrX | 56607382 | 56607382 | + | 2.23E-08   | 6.08E-07   | -34.70407999 |
| chrX | 56827618 | 56827618 | - | 2.97E-12   | 1.31E-10   | -33.10646934 |
| chrX | 58038249 | 58038249 | + | 0.00020809 | 0.00237034 | -25.10344828 |
| chrX | 60548287 | 60548287 | + | 5.35E-05   | 0.000732   | -25.76923077 |
| chrX | 60773420 | 60773420 | - | 3.79E-05   | 0.00054059 | -31.11111111 |
| chrX | 70478853 | 70478853 | + | 9.78E-05   | 0.00123695 | -25.14690265 |
| chrX | 71816265 | 71816265 | - | 2.49E-13   | 1.22E-11   | -36.11243829 |
| chrX | 72986737 | 72986737 | + | 3.46E-05   | 0.00049891 | -38.15789474 |
| chrX | 73064150 | 73064150 | + | 0          | 0          | -38.27955425 |
| chrX | 73064153 | 73064153 | + | 0          | 0          | -38.46073332 |
| chrX | 73064233 | 73064233 | - | 0          | 0          | -46.03394562 |
| chrX | 73064244 | 73064244 | - | 0          | 0          | -54.46504689 |
| chrX | 73064264 | 73064264 | - | 0          | 0          | -47.2047219  |
| chrX | 73064269 | 73064269 | - | 0          | 0          | -52.04787326 |
| chrX | 73064271 | 73064271 | - | 0          | 0          | -58.4729064  |
| chrX | 73064273 | 73064273 | + | 0          | 0          | -57.33452594 |

|      |           |           |   |            |            |              |
|------|-----------|-----------|---|------------|------------|--------------|
| chrX | 73064274  | 73064274  | - | 0          | 0          | -48.1053292  |
| chrX | 73064276  | 73064276  | + | 7.78E-13   | 3.63E-11   | -36.59648445 |
| chrX | 73064292  | 73064292  | + | 0          | 0          | -47.15437788 |
| chrX | 73570519  | 73570519  | - | 0.00102924 | 0.00904258 | -38.14814815 |
| chrX | 73594661  | 73594661  | + | 0          | 0          | -38.05313557 |
| chrX | 73594698  | 73594698  | - | 1.89E-15   | 1.13E-13   | -27.67507003 |
| chrX | 73639769  | 73639769  | + | 7.18E-08   | 1.81E-06   | -27.72326419 |
| chrX | 73823831  | 73823831  | + | 0          | 0          | -26.35062612 |
| chrX | 73823931  | 73823931  | + | 0          | 0          | -26.68861545 |
| chrX | 73823935  | 73823935  | + | 0          | 0          | -29.27953738 |
| chrX | 73824245  | 73824245  | - | 1.38E-05   | 0.00022036 | -26.23188406 |
| chrX | 75156071  | 75156071  | - | 3.08E-12   | 1.35E-10   | -26.53508772 |
| chrX | 75874103  | 75874103  | + | 0          | 0          | -30.10915916 |
| chrX | 82438374  | 82438374  | + | 3.13E-08   | 8.36E-07   | -31.56722201 |
| chrX | 89610983  | 89610983  | + | 6.97E-12   | 2.95E-10   | -25.81616458 |
| chrX | 93988741  | 93988741  | - | 3.49E-11   | 1.37E-09   | -26.45687646 |
| chrX | 94547671  | 94547671  | - | 0          | 0          | -32.44004919 |
| chrX | 94866773  | 94866773  | + | 0          | 0          | -25.71468397 |
| chrX | 94990276  | 94990276  | - | 0.00028807 | 0.0031283  | -26.02445827 |
| chrX | 94990554  | 94990554  | - | 0.00010622 | 0.00132809 | -26.10755085 |
| chrX | 95445082  | 95445082  | - | 0.00027305 | 0.00298937 | -25.10928962 |
| chrX | 96025764  | 96025764  | + | 0          | 0          | -33.05157678 |
| chrX | 98151525  | 98151525  | - | 1.64E-05   | 0.00025811 | -30.27272727 |
| chrX | 98783974  | 98783974  | + | 4.09E-10   | 1.42E-08   | -25.49838921 |
| chrX | 99218393  | 99218393  | + | 0          | 0          | -30.98515644 |
| chrX | 99218445  | 99218445  | - | 0          | 0          | -30.86561454 |
| chrX | 99218473  | 99218473  | - | 5.55E-16   | 3.46E-14   | -28.67351331 |
| chrX | 99291741  | 99291741  | - | 1.06E-05   | 0.00017373 | -25.43824164 |
| chrX | 99291778  | 99291778  | + | 5.47E-06   | 9.62E-05   | -30.14522351 |
| chrX | 99433893  | 99433893  | + | 0          | 0          | -26.05330562 |
| chrX | 99434059  | 99434059  | + | 6.21E-07   | 1.33E-05   | -25.09944198 |
| chrX | 99434060  | 99434060  | - | 0          | 0          | -25.92256778 |
| chrX | 99442844  | 99442844  | - | 0          | 0          | -41.13849765 |
| chrX | 99442852  | 99442852  | - | 0          | 0          | -35.35280971 |
| chrX | 99443278  | 99443278  | + | 0          | 0          | -31.09332528 |
| chrX | 99443282  | 99443282  | + | 3.66E-15   | 2.14E-13   | -29.23381651 |
| chrX | 99443429  | 99443429  | - | 9.10E-15   | 5.11E-13   | -29.38793474 |
| chrX | 99594290  | 99594290  | - | 0          | 0          | -28.78619253 |
| chrX | 99821553  | 99821553  | + | 0.00010813 | 0.00134858 | -28.44932845 |
| chrX | 99821567  | 99821567  | + | 0.00040005 | 0.0041254  | -25.47246495 |
| chrX | 100742123 | 100742123 | - | 0          | 0          | -32.11003735 |



|      |           |           |   |            |            |              |
|------|-----------|-----------|---|------------|------------|--------------|
| chrX | 101255613 | 101255613 | - | 4.07E-08   | 1.07E-06   | -39.57446809 |
| chrX | 101258493 | 101258493 | - | 0          | 0          | -28.09864246 |
| chrX | 101258499 | 101258499 | - | 0          | 0          | -27.7806455  |
| chrX | 101258522 | 101258522 | - | 0          | 0          | -36.96248323 |
| chrX | 101258532 | 101258532 | - | 0          | 0          | -35.34686971 |
| chrX | 101258663 | 101258663 | - | 0          | 0          | -28.32189114 |
| chrX | 101319991 | 101319991 | + | 0          | 0          | -32.65904342 |
| chrX | 101319992 | 101319992 | - | 7.24E-09   | 2.12E-07   | -44.64902186 |
| chrX | 101320047 | 101320047 | - | 0          | 0          | -35.29106916 |
| chrX | 101383757 | 101383757 | + | 1.75E-07   | 4.14E-06   | -25.05211047 |
| chrX | 101383833 | 101383833 | - | 0          | 0          | -27.28316354 |
| chrX | 101479307 | 101479307 | + | 4.54E-10   | 1.56E-08   | -31.82539683 |
| chrX | 101553830 | 101553830 | - | 1.78E-05   | 0.00027632 | -30.3030303  |
| chrX | 101697748 | 101697748 | - | 8.06E-05   | 0.00104573 | -29.08604113 |
| chrX | 101697751 | 101697751 | - | 1.22E-05   | 0.00019738 | -25.18037518 |
| chrX | 101850472 | 101850472 | - | 0          | 0          | -30.73891626 |
| chrX | 102254622 | 102254622 | + | 1.04E-06   | 2.14E-05   | -29.09663866 |
| chrX | 103630989 | 103630989 | - | 3.84E-05   | 0.00054635 | 28.00838574  |
| chrX | 103694772 | 103694772 | - | 0          | 0          | -40.64193548 |
| chrX | 103819479 | 103819479 | - | 1.11E-16   | 7.26E-15   | -25.40818355 |
| chrX | 105393584 | 105393584 | - | 0          | 0          | -25.878757   |
| chrX | 117083307 | 117083307 | + | 1.01E-05   | 0.0001671  | 32.80799112  |
| chrX | 133686875 | 133686875 | + | 3.24E-06   | 6.00E-05   | -37.75510204 |
| chrX | 133686895 | 133686895 | + | 4.09E-08   | 1.07E-06   | -32.96703297 |
| chrX | 133914398 | 133914398 | - | 0          | 0          | -29.35774719 |
| chrX | 134890929 | 134890929 | - | 4.44E-12   | 1.92E-10   | -35.78215623 |
| chrX | 142305779 | 142305779 | - | 0          | 0          | -28.21790026 |
| chrX | 142305803 | 142305803 | + | 0          | 0          | -25.03405548 |
| chrX | 142633223 | 142633223 | + | 4.18E-05   | 0.0005902  | -35.13513514 |
| chrX | 142633224 | 142633224 | - | 0          | 0          | -41.67634005 |
| chrX | 142633234 | 142633234 | + | 3.63E-05   | 0.0005208  | -40.19607843 |
| chrX | 142633235 | 142633235 | - | 0          | 0          | -38.84434488 |
| chrX | 142633239 | 142633239 | - | 0          | 0          | -39.86289362 |
| chrX | 142633242 | 142633242 | - | 0          | 0          | -39.28431603 |
| chrX | 142633246 | 142633246 | - | 0          | 0          | -48.45601844 |
| chrX | 142633250 | 142633250 | - | 0          | 0          | -39.19175269 |
| chrX | 142633254 | 142633254 | - | 0          | 0          | -37.73997191 |
| chrX | 142633258 | 142633258 | - | 0          | 0          | -40.44997294 |
| chrX | 142633266 | 142633266 | - | 0          | 0          | -39.35515034 |
| chrX | 142678865 | 142678865 | - | 0.00040121 | 0.00413516 | -25.94562648 |
| chrX | 142737901 | 142737901 | + | 7.97E-06   | 0.00013501 | -48.11379097 |

|      |           |           |   |            |            |              |
|------|-----------|-----------|---|------------|------------|--------------|
| chrX | 143518491 | 143518491 | + | 0.00042249 | 0.00431792 | -26.43162393 |
| chrX | 143518522 | 143518522 | + | 0.00042249 | 0.00431792 | -26.43162393 |
| chrX | 151017441 | 151017441 | + | 2.00E-05   | 0.00030792 | -25.71428571 |
| chrX | 151169874 | 151169874 | + | 1.00E-06   | 2.06E-05   | -30.76923077 |
| chrX | 151169893 | 151169893 | + | 7.57E-06   | 0.0001289  | -31.57894737 |
| chrX | 152368647 | 152368647 | + | 0          | 0          | -29.76289582 |
| chrX | 152368768 | 152368768 | - | 0.00030916 | 0.00332097 | -25.91157049 |
| chrX | 152368887 | 152368887 | + | 1.54E-09   | 4.94E-08   | -35.76097106 |
| chrX | 152368909 | 152368909 | + | 6.87E-10   | 2.31E-08   | -34.63203463 |
| chrX | 152368916 | 152368916 | + | 1.07E-10   | 3.96E-09   | -38.2023072  |
| chrX | 152369162 | 152369162 | - | 5.05E-13   | 2.40E-11   | -33.57864783 |
| chrX | 153360050 | 153360050 | - | 9.25E-05   | 0.00117878 | -30.40921343 |
| chrX | 157613026 | 157613026 | - | 0          | 0          | -41.54299309 |
| chrX | 157613066 | 157613066 | - | 5.04E-11   | 1.94E-09   | -30.36936885 |
| chrX | 158968697 | 158968697 | - | 0.00019956 | 0.00228719 | 27.62457668  |
| chrX | 159372672 | 159372672 | - | 7.09E-05   | 0.00093558 | -33.70786517 |
| chrX | 159372680 | 159372680 | - | 1.77E-05   | 0.00027589 | -35.95505618 |
| chrX | 159372685 | 159372685 | - | 2.28E-05   | 0.00034542 | -35.22727273 |
| chrX | 159372687 | 159372687 | - | 4.73E-05   | 0.00065706 | -32.95454545 |
| chrX | 159372699 | 159372699 | - | 3.67E-05   | 0.00052559 | -33.70786517 |
| chrX | 159372701 | 159372701 | - | 3.67E-05   | 0.00052559 | -33.70786517 |
| chrX | 159372704 | 159372704 | - | 0.0004111  | 0.0042199  | -25.84269663 |
| chrX | 159880390 | 159880390 | + | 7.88E-13   | 3.67E-11   | -33.03366128 |
| chrX | 161718674 | 161718674 | + | 0          | 0          | -30.74111848 |
| chrX | 161718809 | 161718809 | - | 2.99E-08   | 8.01E-07   | -43.93939394 |
| chrX | 161908878 | 161908878 | - | 0.00047745 | 0.00478578 | -26.40653358 |
| chrX | 162727985 | 162727985 | + | 9.22E-10   | 3.05E-08   | -35.18777374 |
| chrX | 162728152 | 162728152 | - | 2.44E-06   | 4.64E-05   | -29.38596491 |
| chrX | 162728173 | 162728173 | - | 8.06E-06   | 0.00013638 | -27.34375    |
| chrX | 163760809 | 163760809 | - | 1.42E-11   | 5.83E-10   | -37.74290966 |
| chrX | 163760830 | 163760830 | - | 1.53E-09   | 4.92E-08   | -32.52439651 |
| chrX | 164258861 | 164258861 | - | 0.000328   | 0.00349077 | -28.81012658 |
| chrX | 164396270 | 164396270 | - | 6.60E-08   | 1.67E-06   | -25.93220339 |
| chrX | 167207865 | 167207865 | + | 0.000187   | 0.00216364 | -30.95238095 |
| chrX | 167207869 | 167207869 | + | 0.00068394 | 0.00645758 | -26.19047619 |
| chrX | 167212414 | 167212414 | - | 4.44E-16   | 2.79E-14   | -32.18814779 |
| chrX | 167277049 | 167277049 | - | 0.0011489  | 0.00988755 | -27.71929825 |
| chrX | 169774148 | 169774148 | + | 3.66E-10   | 1.27E-08   | -25.69588551 |
| chrX | 169981042 | 169981042 | + | 0.00011794 | 0.00145349 | -31.91489362 |
| chrX | 169994137 | 169994137 | - | 0.00090584 | 0.00814358 | 31.5433975   |
| chrX | 169994339 | 169994339 | - | 4.03E-07   | 8.91E-06   | -61.663286   |

|      |           |           |   |            |            |              |
|------|-----------|-----------|---|------------|------------|--------------|
| chrX | 170677019 | 170677019 | - | 3.47E-07   | 7.77E-06   | -46.01626016 |
| chrX | 170677174 | 170677174 | - | 1.19E-05   | 0.00019278 | -27.05548326 |
| chrY | 1941192   | 1941192   | - | 0.00020479 | 0.002338   | -28.37837838 |
| chrY | 1941210   | 1941210   | - | 3.01E-06   | 5.61E-05   | -29.65568308 |
| chrY | 2412589   | 2412589   | - | 0.00013527 | 0.00163679 | -25.33738192 |
| chrY | 5323908   | 5323908   | + | 9.65E-08   | 2.38E-06   | 30.64516129  |
| chrY | 10643912  | 10643912  | - | 0.00096399 | 0.00856898 | -26.56565657 |
| chrY | 90740540  | 90740540  | + | 9.28E-05   | 0.00118243 | -43.12169312 |

---

cells from *Dnmt3a(mut)*

---

| nearest gene | promoter |
|--------------|----------|
| Npbwr1       | y        |
| Sgk3         | n        |
| Mcm2dc2      | y        |
| Mcm2dc2      | y        |
| Cspp1        | y        |
| Cspp1        | y        |
| Ncoa2        | n        |
| Ncoa2        | n        |
| Crisp4       | n        |
| Il17a        | n        |
| Mcm3         | n        |
| Paqr8        | n        |
| Tram2        | n        |
| Ogfrl1       | n        |
| Dst          | n        |
| Bend6        | n        |
| Dst          | n        |
| Bend6        | n        |
| Dst          | n        |
| Bend6        | n        |
| Ccdc115      | n        |
| Prss40       | y        |
| Fam168b      | n        |
| Arhgef4      | n        |
| Ugg1         | n        |
| Hs6st1       | n        |
| Ugg1         | n        |
| Arid5a       | n        |
| Neur13       | n        |
| Neur13       | n        |
| Arid5a       | n        |
| Neur13       | n        |

|               |   |
|---------------|---|
| Neurl3        | n |
| Kansl3        | n |
| Kansl3        | n |
| Kansl3        | n |
| Cnnm4         | n |
| Cnnm3         | n |
| Fam178b       | n |
| 4933424G06Rik | n |
| Zap70         | y |
| Tmem131       | n |
| Mgat4a        | n |
| Unc50         | n |
| Aff3          | n |
| Nms           | y |
| Nms           | y |
| Nms           | y |
| Aff3          | y |
| Aff3          | y |
| Nms           | y |
| Aff3          | y |
| Nms           | y |
| Nms           | y |
| Aff3          | y |
| Nms           | y |
| Aff3          | y |
| Nms           | y |
| Aff3          | y |
| Aff3          | y |
| Mir6349       | n |
| Npas2         | n |
| Npas2         | n |
| Mir6349       | n |
| Npas2         | n |
| Mir6349       | n |
| Mir6349       | n |
| Npas2         | n |
| Tbc1d8        | n |
| Tbc1d8        | n |
| Npas2         | n |

|               |   |
|---------------|---|
| Tbc1d8        | n |
| Tbc1d8        | n |
| Tbc1d8        | n |
| Rfx8          | n |
| Cnot11        | y |
| Rfx8          | n |
| Map4k4        | n |
| Map4k4        | n |
| Il1r1         | n |
| Il1rl2        | y |
| Il1rl2        | y |
| Il1rl2        | y |
| Gm16894       | y |
| Il1rl2        | y |
| Gm16894       | y |
| Gm16894       | y |
| Gm16894       | y |
| Slc9a2        | n |
| Mfsd9         | n |
| Fhl2          | y |
| Uxs1          | n |
| Hecw2         | n |
| Mir7681       | n |
| Coq10b        | n |
| Coq10b        | n |
| Ankrd44       | n |
| Ankrd44       | n |
| Mars2         | y |
| Boll          | n |
| 9130024F11Rik | n |



|               |   |
|---------------|---|
| Ccnyl1        | n |
| Ccnyl1        | n |
| Fzd5          | n |
| Ccnyl1        | n |
| Fzd5          | n |
| Fzd5          | y |
| Fzd5          | y |
| Fzd5          | y |
| Ccnyl1        | y |
| Ccnyl1        | y |
| Fzd5          | y |
| Fzd5          | y |
| Ccnyl1        | y |
| Ccnyl1        | y |
| Ccnyl1        | n |
| Plekhm3       | n |
| Pikfyve       | n |
| Spag16        | n |
| Spag16        | n |
| Ikzf2         | n |
| 4933417E11Rik | n |
| Tmem169       | n |
| Mreg          | n |
| Tmem169       | n |
| 4-Mar         | n |
| Tnp1          | n |
| Rufy4         | n |
| Tns1          | n |
| Rufy4         | n |
| Tns1          | n |
| Mir1928       | n |
| Gpbar1        | n |
| Aamp          | n |
| Gpbar1        | n |
| Aamp          | n |
| Rnf25         | n |
| Prkag3        | n |



|               |   |
|---------------|---|
| Prkag3        | n |
| Prkag3        | n |
| Wnt6          | n |
| Prkag3        | n |
| Wnt10a        | y |
| Prkag3        | y |
| Wnt10a        | n |
| Fam134a       | n |
| Stk16         | y |
| A630095N17Rik | y |
| A630095N17Rik | y |
| Stk16         | y |
| A630095N17Rik | y |
| Ptprn         | n |
| Gm15179       | n |
| Gm15179       | n |
| Gm15179       | n |
| Des           | n |
| Des           | n |
| Gm15179       | n |
| Gm15179       | y |
| Speg          | y |
| Gm15179       | y |
| Speg          | y |
| Speg          | n |
| Speg          | n |
| Epha4         | n |
| Sgpp2         | n |

|               |   |
|---------------|---|
| Mrpl44        | y |
| Mrpl44        | y |
| Mrpl44        | y |
| Cul3          | n |
| Agfg1         | n |
| Slc19a3       | n |
| Slc19a3       | n |
| Gm7609        | n |
| Ncl           | n |
| Ncl           | y |
| Ncl           | y |
| Ncl           | n |
| B3gnt7        | n |
| Ncl           | n |
| B3gnt7        | n |
| Nmur1         | n |
| Nmur1         | n |
| Ptma          | n |
| Nppc          | n |
| Prss56        | y |
| Ngef          | n |
| Ngef          | n |
| Dgkd          | y |
| Usp40         | n |
| Mroh2a        | n |
| Mroh2a        | n |
| 2410088K16Rik | n |
| 2410088K16Rik | n |
| Arl4c         | n |
| 2410088K16Rik | n |
| Sh3bp4        | n |
| C030007H22Rik | n |
| Sh3bp4        | n |
| Sh3bp4        | n |
| Sh3bp4        | n |
| Agap1         | n |
| Agap1         | n |
| Agap1         | n |



|               |   |
|---------------|---|
| Agap1         | y |
| Agap1         | n |
| Agap1         | n |
| Agap1         | n |
| Gbx2          | n |
| Agap1         | n |
| Gbx2          | n |
| Agap1         | n |
| Gbx2          | n |
| Ackr3         | y |
| Ackr3         | y |
| Ackr3         | y |
| Iqca          | y |
| Ackr3         | y |
| Rab17         | n |
| Rab17         | n |
| Rab17         | y |
| Lrrfip1       | n |
| Rab17         | n |
| Traf3ip1      | n |
| Per2          | n |
| Traf3ip1      | n |
| Per2          | n |
| Per2          | n |
| Gpr35         | y |
| 2310007B03Rik | n |
| 2310007B03Rik | n |
| Sned1         | n |
| Pign          | n |
| Zcchc2        | n |
| Gm20753       | y |
| Serpinb5      | n |
| Serpinb3c     | n |
| Nifk          | n |
| Clasp1        | n |
| 2900060B14Rik | n |

|               |   |
|---------------|---|
| Mir6346       | n |
| Gli2          | n |
| Gli2          | n |
| Gli2          | n |
| Mir6346       | n |
| Gli2          | n |
| Mir6346       | n |
| Mir6346       | n |
| Gli2          | n |
| Tmem185b      | n |
| 3110009E18Rik | n |
| 3110009E18Rik | n |
| Marco         | n |
| Celrr         | n |
| Mgat5         | n |
| Ubxn4         | n |
| Dars          | n |
| Ubxn4         | n |
| Dars          | n |
| Ubxn4         | n |
| Dars          | n |
| Dars          | n |
| C4bp          | y |
| Il19          | n |
| Faim3         | n |
| Mapkapk2      | n |
| Mapkapk2      | n |
| Mapkapk2      | n |
| Rassf5        | n |
| Eif2d         | y |
| Eif2d         | y |
| Srgap2        | y |
| Srgap2        | n |
| Lemd1         | n |
| Lemd1         | n |
| Cdk18         | y |
| Lemd1         | y |
| Lemd1         | n |

|         |   |
|---------|---|
| Cdk18   | n |
| Tmcc2   | n |
| Klhdc8a | n |
| Tmcc2   | n |
| Nuak2   | n |
| Tmcc2   | y |
| Mdm4    | n |
| Pik3c2b | n |
| Pik3c2b | n |
| Mdm4    | n |
| Mdm4    | n |
| Mdm4    | n |
| Gm19461 | n |
| Plekha6 | n |
| Gm19461 | n |
| Plekha6 | n |
| Plekha6 | n |
| Gm19461 | n |
| Etnk2   | n |
| Etnk2   | n |
| Etnk2   | n |
| Sox13   | n |
| Fmod    | n |
| Atp2b4  | n |
| Fmod    | n |
| Fmod    | n |
| Optc    | n |
| Optc    | n |
| Optc    | n |
| Fmod    | n |
| Optc    | n |
| Optc    | n |
| Fmod    | n |
| Btg2    | n |
| Fmod    | n |
| Btg2    | n |
| Btg2    | n |
| Mybph   | y |

|          |   |
|----------|---|
| Ppfia4   | n |
| Adipor1  | n |
| Tmem183a | n |
| Ppp1r12b | n |
| Lgr6     | n |
| Lgr6     | n |
| Ptpn7    | n |
| Ptprv    | n |
| Ptprv    | n |
| Arl8a    | n |
| Gpr37l1  | n |
| Lmod1    | n |
| Csrp1    | y |
| Csrp1    | y |
| Nav1     | y |
| Nav1     | y |
| Csrp1    | y |
| Nav1     | y |
| Csrp1    | y |
| Csrp1    | y |
| Nav1     | y |
| Nav1     | y |
| Csrp1    | y |
| Nav1     | n |
| Csrp1    | n |
| Nav1     | n |
| Nav1     | n |
| Csrp1    | n |
| Nav1     | n |
| Csrp1    | n |
| Pkp1     | n |
| Kif21b   | y |
| Kif21b   | n |
| Gm15850  | n |
| Gm15850  | n |

|               |   |
|---------------|---|
| Kif21b        | n |
| 5730559C18Rik | n |
| Kif21b        | n |
| Kif21b        | n |
| Kif21b        | y |
| 5730559C18Rik | y |
| 9230116N13Rik | n |
| Gm16880       | n |
| Nr5a2         | n |
| Nek7          | n |
| B3galt2       | n |
| Ptgs2         | n |
| C730036E19Rik | n |
| Hmcn1         | n |
| Swt1          | n |
| Fam129a       | y |
| Rnf2          | n |
| Edem3         | n |
| Colgalt2      | n |
| Colgalt2      | n |
| Apobec4       | n |
| Lamc2         | n |
| Nmnat2        | n |
| Lamc2         | n |
| Lamc2         | n |
| Lamc1         | n |
| Rgs8          | n |
| Rgs8          | n |
| Teddm2        | n |
| Stx6          | n |
| Ier5          | n |
| Xpr1          | n |
| Xpr1          | n |
| Qsox1         | n |



|               |   |
|---------------|---|
| Tdrd5         | y |
| Nphs2         | y |
| Nphs2         | y |
| Nphs2         | n |
| 2810025M15Rik | n |
| Rasal2        | n |
| BC026585      | n |
| Rasal2        | n |
| 4930562F07Rik | n |
| Rabgap1l      | y |
| Klhl20        | y |
| Klhl20        | y |
| Klhl20        | y |
| 2810442N19Rik | n |
| 2810442N19Rik | n |
| Dnm3          | n |
| Selp          | n |
| Gm16548       | n |
| 4930568G15Rik | n |
| Gpr161        | n |
| Tbx19         | n |
| Adcy10        | n |
| Adcy10        | n |
| Adcy10        | n |
| Mpzl1         | n |
| Adcy10        | n |
| Rcsd1         | n |
| Creg1         | n |
| Creg1         | n |
| Gpa33         | n |
| Tada1         | n |
| Uck2          | n |
| Mir6347       | y |
| Lrrc52        | n |
| Pbx1          | n |
| Mir6348       | n |
| Pbx1          | n |
| Mir6348       | n |
| Olfml2b       | n |
| Fcgr4         | n |
| Cfap126       | n |

|               |   |
|---------------|---|
| Sdhc          | n |
| Sdhc          | n |
| Nr1i3         | n |
| Pcp4l1        | n |
| Nr1i3         | n |
| Pcp4l1        | n |
| Pcp4l1        | n |
| Fcer1g        | n |
| Ndufs2        | y |
| Ndufs2        | y |
| Adamts4       | y |
| Ndufs2        | y |
| Adamts4       | y |
| Ndufs2        | y |
| Ppox          | y |
| Ppox          | y |
| Ppox          | y |
| Klhdc9        | y |
| Klhdc9        | y |
| Klhdc9        | n |
| Vangl2        | n |
| Dcaf8         | n |
| Dcaf8         | n |
| Atp1a4        | n |
| Atp1a4        | n |
| Dcaf8         | n |
| Atp1a4        | n |
| Pigm          | n |
| Pigm          | n |
| Pigm          | n |
| Kcnj9         | n |
| Cfap45        | n |
| Cfap45        | n |
| 4933439K11Rik | n |
| Cfap45        | n |
| Cfap45        | n |
| 4933439K11Rik | n |
| Cfap45        | n |
| Vsig8         | n |
| 4933439K11Rik | n |
| Vsig8         | n |

|               |   |
|---------------|---|
| Slamf8        | y |
| Aim2          | y |
| Akt3          | n |
| Akt3          | n |
| Akt3          | n |
| Zbtb18        | n |
| 1700016C15Rik | n |
| Gm5069        | n |
| Itpkb         | n |
| Gm5069        | n |
| Itpkb         | n |
| Gm5069        | n |
| Itpkb         | n |
| Gm5069        | n |
| Itpkb         | n |
| Lin9          | y |
| Lin9          | y |
| Mixl1         | y |
| H3f3a         | n |
| Ephx1         | y |
| Ccdc121       | n |
| Cnih3         | n |
| Srp9          | n |
| Srp9          | n |
| Vmn1r1        | n |
| Trp53bp2      | n |
| Capn2         | n |
| Capn8         | n |
| Capn8         | n |
| Susd4         | y |
| Ccdc185       | y |
| Susd4         | n |
| Tlr5          | n |
| Disp1         | n |
| Tlr5          | n |
| Aida          | n |
| Hhipl2        | n |

|               |   |
|---------------|---|
| Dusp10        | n |
| Dusp10        | n |
| 1700056E22Rik | n |
| 1700112H15Rik | n |
| Hlx           | n |
| 4930488B22Rik | n |
| Hlx           | n |
| Hlx           | n |
| Hlx           | n |
| 4930488B22Rik | n |
| Hlx           | n |
| 4930488B22Rik | n |
| Hlx           | n |
| Hlx           | n |
| 4930488B22Rik | n |
| Hlx           | n |
| 4930488B22Rik | n |
| Hlx           | n |
| Hlx           | n |
| 4930488B22Rik | y |
| 4930488B22Rik | y |
| 4930488B22Rik | y |
| Hlx           | y |
| 4930488B22Rik | y |
| Hlx           | y |
| Hlx           | y |
| 4930488B22Rik | y |
| 4930488B22Rik | n |
| 4930488B22Rik | n |
| Hlx           | n |
| 4930488B22Rik | n |
| 4930488B22Rik | n |
| Hlx           | n |
| 2-Mar         | n |
| 4930488B22Rik | n |
| 4930488B22Rik | n |
| C130074G19Rik | n |
| C130074G19Rik | n |

|               |   |
|---------------|---|
| Lyplal1       | n |
| Tgfb2         | n |
| Esrrg         | n |
| 9330162B11Rik | n |
| Smyd2         | n |
| Smyd2         | n |
| Nenf          | n |
| Nenf          | n |
| Tmem206       | n |
| Dtl           | n |
| Dtl           | n |
| Dtl           | n |
| Kcnh1         | n |
| 1700065J18Rik | n |
| Hhat          | n |
| Sertad4       | n |
| 1700065J18Rik | n |
| Sertad4       | n |
| 1700065J18Rik | n |
| Lamb3         | y |
| Zbtb2         | n |
| Zbtb2         | n |
| Akap12        | y |
| Akap12        | y |
| Akap12        | y |
| Zbtb2         | y |
| Zbtb2         | y |
| 1700052N19Rik | y |
| Esr1          | n |
| Esr1          | n |
| Oprm1         | n |
| Oprm1         | n |
| Lrp11         | n |
| Zc3h12d       | n |
| Zc3h12d       | n |
| Zc3h12d       | n |
| Tab2          | n |
| Sf3b5         | n |
| Utrn          | n |
| Utrn          | n |
| Utrn          | n |

|         |   |
|---------|---|
| Utrn    | n |
| Plagl1  | n |
| Zc2hc1b | n |
| Plagl1  | n |
| Zc2hc1b | n |
| Plagl1  | n |
| Zc2hc1b | n |
| Plagl1  | n |
| Zc2hc1b | n |
| Plagl1  | n |
| Zc2hc1b | n |
| Plagl1  | n |
| Zc2hc1b | n |
| Plagl1  | n |
| Zc2hc1b | n |
| Plagl1  | n |
| Zc2hc1b | n |
| Plagl1  | n |
| Zc2hc1b | n |
| Plagl1  | n |
| Zc2hc1b | n |
| Zc2hc1b | n |
| Pex3    | n |
| Aig1    | n |
| Hivep2  | n |

|               |   |
|---------------|---|
| Gpr126        | n |
| Hivep2        | n |
| Gpr126        | n |
| 1700016L04Rik | y |
| Gpr126        | y |
| Cited2        | n |
| Gm20125       | n |
| Cited2        | n |
| Reps1         | n |
| Ect2l         | n |
| Nhsl1         | n |
| Nhsl1         | n |
| 4930444F02Rik | y |
| Tnfaip3       | n |
| Olig3         | n |
| Olig3         | n |
| Tnfaip3       | n |
| Olig3         | n |
| Tnfaip3       | n |
| Tnfaip3       | n |
| Il20ra        | n |
| Slc35d3       | n |
| Il20ra        | n |
| Slc35d3       | n |
| Il20ra        | n |
| Slc35d3       | n |
| Il20ra        | n |
| Il20ra        | n |
| Slc35d3       | n |
| Slc35d3       | n |
| Map3k5        | n |
| Mtfr2         | n |
| Mtfr2         | n |
| Ahi1          | n |
| 4930455C13Rik | n |
| 4930444G20Rik | n |
| 4930444G20Rik | y |
| 4930444G20Rik | y |
| 4930444G20Rik | n |
| E030030I06Rik | n |
| E030030I06Rik | n |

|               |   |
|---------------|---|
| E030030I06Rik | n |
| Slc18b1       | n |
| Eya4          | y |
| Eya4          | y |
| Enpp1         | y |
| Enpp1         | n |
| Hey2          | n |
| Rnf217        | n |
| Fam229b       | n |
| Tube1         | n |
| Wisp3         | n |
| E130307A14Rik | n |
| E130307A14Rik | n |
| Fyn           | n |
| Fyn           | n |
| E130307A14Rik | n |
| 2010001E11Rik | y |
| 2010001E11Rik | y |
| Cdk19         | n |
| Cdk19         | n |
| Amd1          | n |
| Mettl24       | n |
| 5730435O14Rik | n |
| 5730435O14Rik | n |
| Ccdc162       | n |
| Ccdc162       | n |
| Scml4         | n |
| Sobp          | n |
| 1700021F05Rik | n |
| 1700027J07Rik | n |
| 1700027J07Rik | n |
| Speer5-ps1    | n |
| Aim1          | n |
| Speer5-ps1    | n |
| Atg5          | n |
| Atg5          | n |
| Prdm1         | y |
| Atg5          | y |



|          |   |
|----------|---|
| Prdm1    | y |
| Atg5     | y |
| Prdm1    | y |
| Atg5     | y |
| Prdm1    | y |
| Atg5     | y |
| Prep     | n |
| Lin28b   | n |
| Lin28b   | n |
| Ascc3    | n |
| Rfx6     | n |
| Gopc     | n |
| Tbc1d32  | n |
| Msl3l2   | n |
| Tbc1d32  | n |
| Msl3l2   | n |
| Tbc1d32  | n |
| Tbc1d32  | n |
| Tbc1d32  | n |
| Gcc2     | y |
| BB019430 | n |
| Pla2g12b | n |
| Mcu      | n |
| Ddit4    | n |
| Micu1    | n |
| Ddit4    | n |
| Dnajb12  | n |
| Dnajb12  | n |
| Dnajb12  | n |
| Spock2   | n |
| Spock2   | n |
| Spock2   | n |

|          |   |
|----------|---|
| Chst3    | n |
| Chst3    | n |
| Cdh23    | y |
| Cdh23    | n |
| Gm17455  | n |
| Cdh23    | n |
| Cdh23    | n |
| Mir6408  | n |
| Mir6408  | n |
| Cdh23    | n |
| Mir6408  | n |
| Mir6408  | n |
| Cdh23    | n |
| Slc29a3  | n |
| Unc5b    | n |
| Mir6408  | n |
| Mir6408  | n |
| Unc5b    | n |
| Unc5b    | n |
| Mir6408  | n |
| Sgpl1    | n |
| Sgpl1    | n |
| Tbata    | n |
| Pald1    | n |
| Eif4ebp2 | n |
| Aifm2    | n |
| H2afy2   | n |
| H2afy2   | y |
| Col13a1  | n |
| Col13a1  | n |
| Mir5108  | n |
| Mir5108  | n |
| Col13a1  | n |

|               |   |
|---------------|---|
| Mir5108       | n |
| Mir5108       | n |
| Col13a1       | n |
| Col13a1       | n |
| Neurog3       | n |
| Neurog3       | n |
| Col13a1       | n |
| Tspan15       | n |
| Tspan15       | n |
| Tspan15       | n |
| Tacr2         | n |
| Tspan15       | n |
| Hk1           | n |
| Mir7215       | n |
| Stox1         | n |
| Tet1          | n |
| Tet1          | n |
| Slc25a16      | n |
| Tet1          | n |
| Slc25a16      | n |
| Tet1          | n |
| Sirt1         | n |
| Sirt1         | n |
| Sirt1         | n |
| Gm31763       | n |
| Jmjd1c        | n |
| Ado           | n |
| Egr2          | n |
| Ado           | n |
| Ado           | y |
| Ado           | y |
| Egr2          | n |
| Tmem26        | n |
| Tmem26        | n |
| 1700040L02Rik | n |
| Tmem26        | n |
| 1700040L02Rik | n |
| 1700040L02Rik | n |
| Rhobtb1       | n |
| Ank3          | y |
| Phyhipl       | n |

|               |   |
|---------------|---|
| Slc16a9       | n |
| Slc16a9       | n |
| Slc16a9       | n |
| Phyhipl       | n |
| 1700049L16Rik | n |
| Pcdh15        | n |
| Rsph14        | n |
| Adora2a       | n |
| Gucd1         | n |
| Upb1          | n |
| Lrrc75b       | y |
| Ggt1          | y |
| Lrrc75b       | y |
| Ggt1          | y |
| Ggt1          | y |
| Ggt1          | y |
| Derl3         | n |
| Chchd10       | y |
| Gm867         | n |
| Col18a1       | n |
| Slc19a1       | n |
| Slc19a1       | n |
| Col18a1       | n |
| Slc19a1       | n |
| Pofut2        | n |
| Gm10941       | n |
| Pofut2        | n |
| Gm17769       | n |
| Pttg1ip       | n |
| Ube2g2        | n |
| Dnmt3l        | y |
| Aire          | y |
| Cstb          | n |
| Agpat3        | n |
| Cstb          | n |

|               |   |
|---------------|---|
| Mir6410       | n |
| Mir6410       | n |
| Bc1           | n |
| Hcn2          | n |
| Bc1           | n |
| Hcn2          | n |
| Hcn2          | n |
| Fstl3         | y |
| Palm          | n |
| Bc1           | n |
| Bc1           | n |
| Palm          | n |
| Bc1           | n |
| Ptbp1         | n |
| E130317F20Rik | n |
| Bc1           | n |
| Bc1           | y |
| Kiss1r        | n |
| Kiss1r        | n |
| Kiss1r        | n |
| Bc1           | n |
| Kiss1r        | n |
| Bc1           | n |
| Bc1           | n |
| Kiss1r        | n |
| Kiss1r        | n |
| Kiss1r        | n |
| Bc1           | n |
| Kiss1r        | n |
| Kiss1r        | n |
| Bc1           | n |
| Bc1           | n |
| Bc1           | n |
| Kiss1r        | n |
| Kiss1r        | n |
| Bc1           | n |
| Kiss1r        | n |

|        |   |
|--------|---|
| Bc1    | n |
| Kiss1r | n |
| Bc1    | n |
| Kiss1r | n |
| Bc1    | n |
| Kiss1r | n |
| Bc1    | n |
| Kiss1r | n |
| Bc1    | n |
| Kiss1r | n |
| Bc1    | n |
| Bc1    | n |
| Bc1    | n |
| Arid3a | n |
| Arid3a | n |
| Bc1    | n |
| Cnn2   | y |
| Hmha1  | y |
| Hmha1  | y |
| Hmha1  | y |
| Bc1    | y |
| Bc1    | n |
| Dos    | n |
| Stk11  | y |
| Cirbp  | n |
| Bc1    | n |

|           |   |
|-----------|---|
| Bc1       | n |
| Bc1       | n |
| Mum1      | n |
| Bc1       | n |
| Bc1       | n |
| Mum1      | n |
| Dazap1    | n |
| Rps15     | y |
| Bc1       | n |
| Pcsk4     | n |
| Reep6     | n |
| Plk5      | y |
| Plk5      | y |
| Onecut3   | n |
| Tcf3      | n |
| Onecut3   | n |
| Csnk1g2   | y |
| Csnk1g2   | y |
| Amh       | n |
| Jsrp1     | n |
| Sppl2b    | y |
| Sppl2b    | y |
| Tmprss9   | n |
| Timm13    | n |
| Timm13    | n |
| Gadd45b   | n |
| Gadd45b   | n |
| Gng7      | y |
| Thop1     | n |
| Mir5615-2 | y |
| Zbtb7a    | n |

|               |   |
|---------------|---|
| Zbtb7a        | n |
| Eef2          | y |
| Eef2          | y |
| Mrpl54        | y |
| Pip5k1c       | y |
| Pip5k1c       | y |
| Pip5k1c       | y |
| Tjp3          | y |
| Tjp3          | y |
| Pip5k1c       | n |
| Tjp3          | n |
| Pip5k1c       | n |
| Pip5k1c       | n |
| Tbxa2r        | y |
| Gipc3         | y |
| Hmg20b        | n |
| Hmg20b        | y |
| Hmg20b        | y |
| 4930404N11Rik | y |
| Fzr1          | y |
| Dohh          | y |
| Fzr1          | y |
| Dohh          | y |
| Smim24        | n |
| Nfic          | n |
| Smim24        | n |
| Nfic          | n |
| Nfic          | n |
| Nfic          | n |
| Smim24        | n |
| Nfic          | n |
| Nfic          | n |
| Nfic          | n |



|               |   |
|---------------|---|
| Smim24        | n |
| Nfic          | n |
| Smim24        | n |
| Nfic          | n |
| Gna15         | n |
| Aes           | n |
| Tle2          | n |
| Tle6          | n |
| Tle2          | n |
| Tle6          | n |
| BC025920      | y |
| Hcfc2         | n |
| Nfyb          | n |
| Txnrd1        | n |
| Slc41a2       | n |
| Chst11        | n |
| Slc41a2       | n |
| Chst11        | n |
| Chst11        | n |
| Chst11        | n |
| Slc41a2       | n |
| 4930463O16Rik | n |
| 4930463O16Rik | n |
| Nuak1         | n |
| Nuak1         | n |
| Nuak1         | n |

|               |   |
|---------------|---|
| 4930463O16Rik | n |
| Nuak1         | n |
| Nuak1         | y |
| 4930463O16Rik | y |
| Ckap4         | y |
| Polr3b        | n |
| Rfx4          | n |
| C330046G13Rik | n |
| Ric8b         | n |
| Ric8b         | n |
| Fhl4          | n |
| Syn3          | n |
| Nt5dc3        | y |
| Nt5dc3        | n |
| Nt5dc3        | n |
| Nt5dc3        | n |
| Dram1         | n |
| Dram1         | n |
| Chpt1         | n |
| Uhrf1bp1l     | y |
| Uhrf1bp1l     | n |
| Apaf1         | n |
| Apaf1         | n |
| Apaf1         | n |
| lkbip         | n |
| Cdk17         | n |
| Elk3          | n |
| Cdk17         | n |

|               |   |
|---------------|---|
| Mir7688       | n |
| Mir7688       | n |
| Mir7688       | n |
| Amdhd1        | n |
| Amdhd1        | n |
| Usp44         | n |
| Metap2        | n |
| Metap2        | y |
| Usp44         | y |
| Metap2        | y |
| Usp44         | y |
| Metap2        | y |
| Usp44         | y |
| Metap2        | y |
| Metap2        | y |
| Ndufa12       | n |
| Tmcc3         | y |
| Mir7211       | n |
| Tmcc3         | n |
| Plxnc1        | y |
| Cep83         | n |
| 2310039L15Rik | n |
| 2310039L15Rik | n |
| 2310039L15Rik | n |
| Cradd         | n |
| Socs2         | n |
| Nudt4         | n |
| Nudt4         | n |
| 4930459C07Rik | n |
| Nudt4         | n |
| Ccer1         | y |
| Gm18409       | n |
| Dusp6         | n |
| Dusp6         | n |
| Gm18409       | n |
| Gm18409       | n |
| Dusp6         | n |

|               |   |
|---------------|---|
| Dusp6         | n |
| Dusp6         | n |
| Gm18409       | n |
| Alx1          | n |
| Lrriq1        | n |
| Mir6411       | n |
| Tmtc2         | n |
| Myf6          | n |
| Lin7a         | y |
| Otogl         | n |
| Syt1          | n |
| Pawr          | n |
| Syt1          | n |
| 1700020G17Rik | n |
| 1700020G17Rik | n |
| 9230102K24Rik | n |
| 1700020G17Rik | n |
| 1700020G17Rik | n |
| 4933440J02Rik | n |
| Atxn7l3b      | n |
| Atxn7l3b      | n |
| Ptpr          | n |
| Ptprb         | n |
| Ptprb         | n |
| Kcnmb4        | n |
| Kcnmb4        | n |
| 4933412E12Rik | n |
| 4933412E12Rik | n |
| 4933412E12Rik | n |
| 1700030O20Rik | n |
| Cct2          | y |
| Lrrc10        | n |
| Lrrc10        | n |
| 9530003J23Rik | n |
| Cpm           | n |
| Cpsf6         | n |
| Cpsf6         | n |
| Cpsf6         | n |
| Mdm2          | n |
| Mdm2          | n |
| Mdm2          | n |

|               |   |
|---------------|---|
| Rap1b         | n |
| Rap1b         | n |
| Rap1b         | n |
| 4933411E08Rik | n |
| Il22          | n |
| Ifng          | n |
| Tmevpg1       | n |
| Ifng          | n |
| Tmevpg1       | n |
| 1700064J06Rik | n |
| 1700064J06Rik | n |
| 1700064J06Rik | n |
| Cand1         | n |
| Cand1         | n |
| Cand1         | n |
| 1700064J06Rik | n |
| Cand1         | n |
| Llph          | n |
| Irak3         | n |
| Hmga2         | n |
| Hmga2         | n |
| 4921513I03Rik | n |
| Msrb3         | n |
| Msrb3         | n |
| 4921513I03Rik | n |
| 4921513I03Rik | n |
| 4921513I03Rik | n |
| Msrb3         | n |
| 4921513I03Rik | n |
| Msrb3         | n |
| 4921513I03Rik | n |
| Tbc1d30       | n |
| Rassf3        | n |
| Gns           | n |
| Gns           | n |
| Rassf3        | y |
| Rassf3        | n |
| Rassf3        | n |

|               |   |
|---------------|---|
| Tbk1          | n |
| Tbk1          | n |
| Tbk1          | n |
| Xpot          | n |
| Gm4489        | n |
| Gm4489        | n |
| Tmem5         | n |
| A130077B15Rik | n |
| Ppm1h         | n |
| Ppm1h         | n |
| Mirlet7i      | n |
| Ppm1h         | n |
| Usp15         | n |
| Usp15         | n |
| Lrig3         | n |
| Ctdsp2        | n |
| Xrcc6bp1      | n |
| Ctdsp2        | n |
| Ctdsp2        | n |
| LOC100504608  | n |
| Agap2         | y |
| Agap2         | y |
| Tspan31       | y |
| Tspan31       | y |
| Tspan31       | y |
| Agap2         | y |
| Tspan31       | y |
| Tspan31       | y |
| Agap2         | y |
| Tspan31       | y |
| Agap2         | n |
| Tspan31       | n |
| Tspan31       | n |
| Tspan31       | n |
| Agap2         | n |
| Os9           | n |
| Slc26a10      | y |
| Arhgef25      | n |

|          |   |
|----------|---|
| Arhgef25 | n |
| Arhgef25 | n |
| Arhgap9  | y |
| Gli1     | n |
| Arhgap9  | n |
| Gli1     | n |
| Arhgap9  | n |
| Gli1     | n |
| Arhgap9  | n |
| Gli1     | n |
| Arhgap9  | n |
| Gli1     | n |
| Gli1     | n |
| Arhgap9  | n |
| Arhgap9  | n |
| Gli1     | n |
| Arhgap9  | n |
| Gli1     | n |
| Arhgap9  | n |
| Gli1     | n |
| Gli1     | n |
| Arhgap9  | n |
| Gli1     | n |
| Arhgap9  | n |
| Gli1     | n |
| Arhgap9  | n |
| Gli1     | n |
| Shmt2    | n |
| Ndufa4l2 | n |
| Nxph4    | n |
| Stat6    | n |
| Lrp1     | n |
| Stat6    | n |
| Lrp1     | n |

|               |   |
|---------------|---|
| Stat6         | n |
| Stat6         | n |
| Lrp1          | y |
| Lrp1          | y |
| Nab2          | n |
| Stat6         | n |
| Stat6         | n |
| Zbtb39        | n |
| Gpr182        | n |
| Gpr182        | n |
| Zbtb39        | y |
| Gpr182        | y |
| Zbtb39        | y |
| Rbms2         | n |
| Smarcc2       | y |
| Smarcc2       | n |
| Ikzf4         | y |
| Ikzf4         | y |
| Wibg          | n |
| Dgka          | n |
| Olf784        | n |
| Eif4enif1     | y |
| Eif4enif1     | y |
| Sfi1          | y |
| Limk2         | n |
| 8430429K09Rik | y |
| Inpp5j        | n |
| Tug1          | n |
| Slc35e4       | n |
| Dusp18        | y |
| Ccdc157       | y |
| Ccdc157       | n |
| Hormad2       | y |
| Lif           | n |
| Hormad2       | y |
| Ascc2         | n |
| Ap1b1         | y |
| Ap1b1         | y |



|         |   |
|---------|---|
| Ap1b1   | y |
| Ap1b1   | y |
| Ap1b1   | y |
| Ap1b1   | n |
| Ap1b1   | n |
| Nefh    | n |
| Ap1b1   | n |
| Nefh    | n |
| Nefh    | n |
| Rasl10a | y |
| Rasl10a | y |
| Gas2l1  | y |
| Rasl10a | y |
| Gas2l1  | y |
| Rasl10a | y |
| Gas2l1  | y |
| Gas2l1  | y |
| Gas2l1  | y |
| Znrf3   | n |
| Ankrd36 | y |
| Pold2   | y |
| Ykt6    | n |
| Ykt6    | n |
| Camk2b  | n |
| Zmiz2   | n |
| Nacad   | n |
| Wap     | n |
| Gm11992 | n |
| Gm11992 | n |
| Tns3    | n |
| Zpbp    | n |
| Figl1   | n |

|               |   |
|---------------|---|
| lkzf1         | y |
| 1700042O10Rik | n |
| 1700042O10Rik | n |
| 1700042O10Rik | n |
| Cobl          | n |
| 1700042O10Rik | n |
| Etaa1         | n |
| Meis1         | n |
| Meis1         | n |
| Meis1         | n |
| Spred2        | n |
| Spred2        | n |
| Meis1         | n |
| Spred2        | n |
| Actr2         | n |
| Actr2         | n |
| Spred2        | n |
| Spred2        | n |
| Spred2        | n |
| Slc1a4        | n |
| Sertad2       | n |
| Sertad2       | n |
| Sertad2       | n |
| Ugp2          | n |
| Otx1          | y |
| Wdpcp         | n |
| Ehbp1         | n |
| Ehbp1         | n |
| Wdpcp         | n |
| Ehbp1         | n |
| Wdpcp         | n |
| Wdpcp         | n |
| Ehbp1         | n |
| Ehbp1         | n |
| Ehbp1         | n |
| Tmem17        | n |
| Tmem17        | n |
| Papolg        | n |
| Bcl11a        | n |
| Bcl11a        | n |
| Bcl11a        | n |

|               |   |
|---------------|---|
| Papolg        | n |
| Papolg        | n |
| 5730522E02Rik | n |
| Cpeb4         | n |
| 4930524B15Rik | y |
| 4930524B15Rik | y |
| Il9r          | n |
| Il9r          | n |
| Il9r          | n |
| Snrnp25       | y |
| Il9r          | y |
| Nprl3         | y |
| Nprl3         | y |
| Stk10         | y |
| Stk10         | n |
| Kcnmb1        | n |
| Kcnip1        | n |
| Kcnmb1        | y |
| Foxi1         | n |
| Tenm2         | n |
| Atp10b        | n |
| Ccnjl         | n |
| Ccnjl         | n |
| Ccnjl         | n |
| Fabp6         | n |
| Fabp6         | n |
| Pwwp2a        | n |
| Adra1b        | n |
| Ublcp1        | y |
| Ebf1          | n |
| Ebf1          | n |
| Ebf1          | n |
| Gm12159       | n |
| Clint1        | n |
| Thg1l         | y |
| Thg1l         | y |
| Sox30         | y |
| Adam19        | n |
| Adam19        | n |
| Sgcd          | n |
| Trim41        | n |

|               |   |
|---------------|---|
| Trim7         | n |
| Trim7         | n |
| Irgm1         | n |
| Trim7         | n |
| Trim7         | n |
| Trim7         | n |
| Irgm1         | n |
| Cnot6         | n |
| Gfpt2         | y |
| Cnot6         | y |
| Cnot6         | y |
| Cnot6         | y |
| Gfpt2         | y |
| Cnot6         | y |
| Gfpt2         | y |
| Cnot6         | y |
| Gfpt2         | y |
| Mir804        | n |
| Adamts2       | n |
| BC049762      | n |
| Col23a1       | n |
| Hnrnpab       | n |
| Rmnd5b        | n |
| Rmnd5b        | n |
| D930048N14Rik | n |
| D930048N14Rik | n |
| D930048N14Rik | n |
| N4bp3         | n |
| D930048N14Rik | n |
| N4bp3         | n |
| N4bp3         | n |
| N4bp3         | n |
| Jade2         | n |
| Sar1b         | n |
| Sar1b         | n |
| Jade2         | n |
| Cdkl3         | y |

|           |       |   |
|-----------|-------|---|
| Cdkl3     |       | n |
| Tcf7      |       | y |
| Tcf7      |       | y |
| Skp1a     |       | y |
| Tcf7      |       | n |
| Vdac1     |       | n |
| Tcf7      |       | n |
| Vdac1     |       | n |
| Uqcrq     |       | n |
| Gdf9      |       | n |
| Uqcrq     |       | n |
| Gdf9      |       | n |
| Uqcrq     |       | n |
| Gdf9      |       | n |
| Shroom1   |       | n |
| Shroom1   |       | n |
| Sowaha    |       | n |
| Sowaha    |       | n |
| Shroom1   |       | y |
|           | 8-Sep | y |
|           | 8-Sep | y |
| Kif3a     |       | n |
| Kif3a     |       | n |
| Il13      |       | n |
| Il5       |       | n |
| Irf1      |       | n |
| P4ha2     |       | n |
| P4ha2     |       | n |
| Lym7os    |       | n |
| Slc36a1   |       | n |
| Slc36a1   |       | n |
| Slc36a1os |       | n |
| Fat2      |       | n |
| Fam114a2  |       | n |
| Mfap3     |       | n |
| Galnt10   |       | n |
| Fam114a2  |       | n |



|               |   |
|---------------|---|
| Larp1         | n |
| Hand1         | n |
| Trim11        | n |
| Trim11        | n |
| Gjc2          | n |
| Wnt3a         | n |
| Wnt3a         | n |
| Wnt9a         | n |
| Wnt3a         | n |
| Wnt3a         | n |
| Wnt9a         | n |
| 4933439C10Rik | y |
| 4933439C10Rik | y |
| 4933439C10Rik | y |
| Cops3         | n |
| Med9          | n |
| Med9os        | n |
| Med9os        | n |
| Srebf1        | y |
| Srebf1        | y |
| Rai1          | n |
| Rai1          | n |
| Srebf1        | n |
| Tom1l2        | n |
| Lrrc48        | n |
| Myo15         | n |
| Flii          | n |
| Flii          | n |
| Flii          | n |
| Map2k3os      | y |
| Usp22         | n |
| Tnfrsf13b     | n |
| Usp22         | n |
| Usp22         | n |
| Tnfrsf13b     | n |
| Tnfrsf13b     | n |
| Usp22         | n |

|           |   |
|-----------|---|
| Usp22     | n |
| Tnfrsf13b | n |
| Mapk7     | y |
| Mapk7     | y |
| Mapk7     | y |
| B9d1      | y |
| Slc5a10   | n |
| Slc5a10   | n |
| Grap      | n |
| Fam83g    | y |
| Fam83g    | y |
| Slc5a10   | y |
| Slc5a10   | y |
| Fam83g    | y |
| Slc5a10   | y |
| Fam83g    | y |
| Akap10    | n |
| Trpv2     | n |
| Lrrc75a   | n |
| Pmp22     | n |
| Mir6354   | n |
| Mir6354   | n |
| Pmp22     | n |
| Pmp22     | n |
| Mir6354   | n |
| Mir6354   | n |
| Hs3st3b1  | n |
| Zkscan6   | n |
| Glp2r     | n |
| Glp2r     | n |
| Gas7      | n |
| Gas7      | n |
| Glp2r     | n |
| Glp2r     | n |
| Stx8      | n |
| Stx8      | n |
| Stx8      | n |



|               |   |
|---------------|---|
| Ntn1          | n |
| Ntn1          | n |
| Ntn1          | n |
| Stx8          | n |
| Stx8          | n |
| Ntn1          | n |
| Stx8          | n |
| Ntn1          | n |
| Ntn1          | n |
| Ntn1          | n |
| Stx8          | n |
| Stx8          | n |
| Ccdc42        | n |
| Ntn1          | n |
| Slc25a35      | n |
| Slc25a35      | y |
| Slc25a35      | y |
| Slc25a35      | y |
| Arhgef15      | y |
| Slc25a35      | y |
| Arhgef15      | y |
| Arhgef15      | y |
| Pfas          | n |
| 2310047M10Rik | y |
| 2310047M10Rik | y |
| Hes7          | y |
| Hes7          | y |
| Alox8         | y |
| Alox12b       | y |
| Kcnab3        | y |
| Kcnab3        | y |
| Cntrob        | y |
| Naa38         | y |
| Naa38         | y |
| Naa38         | y |
| Tmem88        | y |
| Naa38         | y |
| Kdm6b         | n |

|         |   |
|---------|---|
| Dnah2   | n |
| Naa38   | n |
| Naa38   | n |
| Dnah2   | n |
| Efnb3   | n |
| Sat2    | y |
| Fxr2    | n |
| Mpdu1   | y |
| Mpdu1   | y |
| Mpdu1   | y |
| Sox15   | y |
| Mpdu1   | y |
| Sox15   | y |
| Mpdu1   | y |
| Sox15   | y |
| Mir1934 | y |
| Zbtb4   | y |
| Zbtb4   | n |
| Chrn1   | n |
| Chrn1   | n |
| Zbtb4   | n |
| Fgf11   | y |
| Tmem102 | y |
| Tmem102 | y |
| Plscr3  | y |
| Plscr3  | y |
| Plscr3  | y |
| Tnk1    | y |
| Plscr3  | y |
| Tnk1    | y |
| Ctdnep1 | y |
| Dlg4    | n |
| Acadvl  | n |
| Acadvl  | n |

|          |   |
|----------|---|
| Acadvl   | n |
| Dlg4     | n |
| Dlg4     | n |
| Slc16a13 | n |
| Slc16a13 | y |
| Mir497   | n |
| Mir497   | n |
| Bcl6b    | n |
| Mir497   | n |
| Bcl6b    | n |
| Mir497   | n |
| Mir497   | n |
| Mir497   | n |
| Bcl6b    | n |
| Mir497   | n |
| Bcl6b    | n |
| Mir497   | n |
| Mir497   | n |
| Bcl6b    | n |
| Bcl6b    | n |
| Mir497   | y |
| Mir497   | n |
| Cxcl16   | n |
| Zmynd15  | n |
| Cxcl16   | n |
| Zmynd15  | n |
| Zmynd15  | n |
| Zmynd15  | n |
| Cxcl16   | n |
| Cxcl16   | n |
| Cxcl16   | n |
| Zmynd15  | n |
| Cxcl16   | n |
| Zmynd15  | n |
| Cxcl16   | n |

|         |   |
|---------|---|
| Zmynd15 | n |
| Cxcl16  | n |
| Zmynd15 | n |
| Cxcl16  | n |
| Vmo1    | y |
| Gltpd2  | y |
| Vmo1    | y |
| Gltpd2  | y |
| Vmo1    | y |
| Gltpd2  | y |
| Vmo1    | y |
| Gltpd2  | y |
| Vmo1    | y |
| Gltpd2  | y |
| Gltpd2  | y |
| Vmo1    | y |
| Vmo1    | y |
| Gltpd2  | y |
| Vmo1    | y |
| Gltpd2  | y |
| Vmo1    | y |
| Gltpd2  | y |
| Vmo1    | y |
| Gltpd2  | y |
| Vmo1    | y |
| Gltpd2  | y |
| Vmo1    | y |
| Chrne   | n |
| Chrne   | n |
| Eno3    | y |

|         |   |
|---------|---|
| Fam64a  | n |
| Fam64a  | n |
| Smtnl2  | y |
| Ube2g1  | n |
| Ube2g1  | n |
| Ube2g1  | n |
| Spns3   | n |
| Atp2a3  | n |
| Cyb5d2  | n |
| Camkk1  | n |
| Mnt     | n |
| Sgsm2   | n |
| Hic1    | n |
| Smg6    | n |
| Rtn4rl1 | n |
| Rtn4rl1 | n |
| Rtn4rl1 | n |
| Rpa1    | n |
| Rtn4rl1 | n |
| Rpa1    | n |
| Rpa1    | n |
| Rpa1    | n |
| Prpf8   | y |
| Scarf1  | y |
| Wdr81   | y |
| Slc43a2 | n |
| Gm12338 | y |
| Myo1c   | y |
| Myo1c   | y |
| Gm12338 | y |
| Doc2b   | n |
| Doc2b   | y |
| Ywhae   | y |
| Doc2b   | y |
| Ywhae   | y |
| Ywhae   | y |
| Doc2b   | y |
| Ywhae   | n |
| Fam101b | y |
| Nxn     | n |
| Rnmtl1  | n |

|           |   |
|-----------|---|
| Timm22    | n |
| Timm22    | n |
| Abr       | n |
| Abr       | n |
| Timm22    | n |
| Abr       | n |
| Timm22    | n |
| Abr       | n |
| Timm22    | n |
| Abr       | n |
| Timm22    | n |
| Timm22    | n |
| Timm22    | n |
| Abr       | n |
| Abr       | n |
| Abr       | n |
| Timm22    | n |
| Abr       | n |
| Timm22    | n |
| Abr       | n |
| Gosr1     | n |
| Tusc5     | n |
| Ankrd13b  | y |
| Coro6     | n |
| Trp53i13  | y |
| Cryba1    | n |
| Pipox     | n |
| Myo18a    | n |
| Pipox     | n |
| Myo18a    | y |
| Myo18a    | y |
| Sez6      | n |
| Slc13a2   | n |
| Slc13a2   | n |
| Slc13a2os | n |
| Ift20     | y |
| Lym9      | n |

|               |   |
|---------------|---|
| Fam58b        | y |
| Lgals9        | n |
| Wsb1          | n |
| Rab11fip4os2  | n |
| Rab11fip4     | n |
| Mir193a       | n |
| Rab11fip4os2  | n |
| Mir193a       | n |
| Mir193a       | n |
| Rab11fip4os2  | n |
| Mir365-2      | n |
| Mir365-2      | n |
| Utp6          | n |
| Utp6          | n |
| Myo1d         | y |
| Myo1d         | y |
| Tmem98        | n |
| 4930507D10Rik | n |
| 4930507D10Rik | n |
| Tmem98        | n |
| Tmem98        | n |
| Asic2         | n |
| Tmem132e      | n |
| Gm11426       | n |
| Gm11426       | n |
| Lig3          | n |
| Rffl          | n |
| Rffl          | n |
| Unc45b        | n |
| Slfn5os       | n |
| Unc45b        | n |
| Unc45b        | n |
| Slfn5os       | n |
| Unc45b        | n |
| Slfn5os       | n |
| Unc45b        | n |
| Unc45b        | n |
| Unc45b        | n |

|               |   |
|---------------|---|
| Slfn5         | n |
| Slfn5         | n |
| Slfn9         | n |
| Slfn5         | n |
| Slfn9         | n |
| Slfn9         | y |
| 1700020L24Rik | y |
| 1700020L24Rik | y |
| Taf15         | y |
| Lhx1          | n |
| 4930502E09Rik | n |
| Bcas3         | n |
| 2610027K06Rik | n |
| 2610027K06Rik | n |
| 2610027K06Rik | n |
| Bcas3         | n |
| 2610027K06Rik | n |
| Bcas3         | n |
| Bcas3         | n |
| 2610027K06Rik | n |
| 2610027K06Rik | n |
| 2610027K06Rik | n |
| Tbx4          | n |
| Tbx4          | n |
| 2610027K06Rik | n |
| Tbx4          | n |
| 2610027K06Rik | n |
| Tbx4          | n |
| 2610027K06Rik | y |
| Tbx4          | n |
| Tbx4          | n |
| Tbx4          | n |
| Ypel2         | y |
| Ppm1e         | n |
| Tex14         | n |



|         |   |
|---------|---|
| Tex14   | n |
| Mir142b | n |
| Mir142b | n |
| Mir142b | n |
| Bzap1   | n |
| Mir142b | n |
| Bzap1   | n |
| Mir142b | n |
| Bzap1   | n |
| Mir142b | n |
| Bzap1   | n |
| Mir142b | n |
| Mir142b | n |
| Bzap1   | n |
| Mir142b | n |
| Bzap1   | n |
| Mir142b | n |
| Dynll2  | n |
| Cuedc1  | n |
| Dynll2  | n |
| Cuedc1  | n |
| Cuedc1  | n |
| Dynll2  | n |
| Dynll2  | n |
| Msi2    | y |
| Cuedc1  | y |
| Cuedc1  | y |
| Msi2    | y |
| Msi2    | y |
| Mrps23  | n |
| Mrps23  | n |
| Msi2    | n |

|               |   |
|---------------|---|
| Msi2          | n |
| Mrps23        | n |
| Mrps23        | n |
| Msi2          | n |
| Mrps23        | n |
| Mrps23        | n |
| Mir378b       | n |
| Msi2          | n |
| Mir378b       | n |
| C030037D09Rik | n |
| Msi2          | n |
| Msi2          | n |
| Msi2          | n |
| C030037D09Rik | n |
| C030037D09Rik | n |
| Msi2          | n |
| 4930556N13Rik | n |
| Pctp          | n |
| Tmem100       | n |
| Pctp          | n |
| Tmem100       | n |
| Tmem100       | n |
| Tmem100       | n |
| Mmd           | n |
| Hlf           | n |
| Mmd           | n |
| Hlf           | n |
| Mmd           | n |
| Hlf           | n |
| Mmd           | n |
| Hlf           | n |
| Mmd           | n |
| Hlf           | n |
| Mmd           | n |
| Hlf           | n |
| Hlf           | n |
| Mmd           | n |

|         |   |
|---------|---|
| Hlf     | n |
| Wfikkn2 | n |
| Spag9   | n |
| Spag9   | n |
| Wfikkn2 | n |
| Wfikkn2 | y |
| Ankrd40 | n |
| Cacna1g | n |
| Cacna1g | n |
| Cacna1g | n |
| Ankrd40 | n |
| Cacna1g | n |
| Cacna1g | n |
| Cacna1g | n |
| Ankrd40 | n |
| Chad    | y |
| Epn3    | y |
| Epn3    | y |
| Mycbpap | y |
| Chad    | n |
| Acsf2   | y |
| Chad    | n |
| Chad    | n |
| Acsf2   | n |
| Col1a1  | y |
| Sgca    | n |
| Sgca    | n |
| Sgca    | n |
| Ppp1r9b | n |
| Sgca    | n |
| Pdk2    | y |
| Pdk2    | n |
| Samd14  | n |
| Pdk2    | n |
| Samd14  | n |
| Samd14  | n |
| Pdk2    | n |

|               |   |
|---------------|---|
| Samd14        | n |
| Pdk2          | n |
| Samd14        | n |
| Pdk2          | n |
| Samd14        | n |
| Pdk2          | n |
| Samd14        | n |
| Pdk2          | n |
| Samd14        | n |
| Pdk2          | n |
| Samd14        | n |
| Pdk2          | n |
| Pdk2          | n |
| Samd14        | n |
| Pdk2          | n |
| Samd14        | n |
| Pdk2          | n |
| Samd14        | n |
| Pdk2          | n |
| Samd14        | n |
| Pdk2          | n |
| Pdk2          | n |
| Dlx3          | y |
| Itga3         | n |
| Dlx3          | n |
| Dlx4          | n |
| A730090H04Rik | n |
| Tac4          | n |
| Tac4          | n |
| Kat7          | n |
| Nxph3         | n |
| Phb           | n |
| Ngfr          | n |
| Zfp652os      | n |
| Phb           | n |
| Zfp652os      | n |

|           |   |
|-----------|---|
| Zfp652os  | n |
| Zfp652    | y |
| Phospho1  | y |
| Gip       | n |
| Gip       | n |
| Gip       | n |
| Igf2bp1   | n |
| Gip       | n |
| Calcoco2  | n |
| Calcoco2  | n |
| Calcoco2  | n |
| Mir196a-1 | n |
| Calcoco2  | n |
| Hoxb8     | n |
| Hoxb7     | n |
| Hoxb7     | n |
| Gm11529   | n |
| Gm11529   | n |
| Hoxb7     | n |
| Hoxb7     | n |
| Gm11529   | n |
| Gm11529   | y |
| Gm11529   | y |
| Hoxb4     | n |
| Gm11529   | n |
| Hoxb4     | n |
| Hoxb3     | n |
| Hoxb3     | n |
| Hoxb3     | n |
| Gm11529   | n |
| Hoxb3     | n |
| Gm11529   | n |
| Hoxb3     | n |
| Hoxb3     | n |
| Hoxb3     | n |
| Gm11529   | n |
| Gm11529   | n |
| Gm11529   | n |

|         |   |
|---------|---|
| Gm11529 | n |
| Hoxb3   | y |
| Gm11529 | y |
| Gm11529 | y |
| Hoxb3   | y |
| Gm11529 | y |
| Hoxb3   | y |
| Gm11529 | y |
| Gm11529 | y |
| Gm11529 | y |
| Hoxb3   | y |
| Hoxb3   | y |
| Hoxb3   | n |
| Hoxb3   | n |
| Gm11529 | n |
| Gm11529 | n |
| Hoxb3   | n |
| Hoxb3   | n |
| Gm11529 | n |
| Hoxb3   | n |
| Gm11529 | n |
| Gm11529 | n |
| Gm11529 | n |
| Hoxb3   | n |
| Hoxb3   | n |

|               |   |
|---------------|---|
| Hoxb3         | n |
| Gm11529       | n |
| Hoxb3         | n |
| Gm11529       | n |
| Hoxb3         | n |
| Gm11529       | n |
| Hoxb3         | n |
| Gm11529       | n |
| Gm11529       | n |
| Hoxb2         | n |
| Hoxb2         | n |
| Hoxb1         | y |
| Hoxb1         | y |
| Gm11529       | y |
| Hoxb1         | y |
| Hoxb1         | y |
| Gm11529       | y |
| Hoxb1         | y |
| Gm11529       | y |
| Hoxb1         | n |
| Hoxb1         | n |
| Hoxb1         | n |
| Gm11529       | n |
| Snx11         | n |
| Skap1         | n |
| Snx11         | n |
| Skap1         | n |
| Cbx1          | y |
| Copz2         | n |
| Prr15l        | y |
| Pnp0          | y |
| Prr15l        | n |
| Prr15l        | n |
| Pnp0          | n |
| D030028A08Rik | n |
| Sp2           | n |
| Sp6           | n |
| Sp2           | n |
| Sp6           | n |
| Sp6           | n |
| Sp6           | n |

|               |   |
|---------------|---|
| Sp6           | n |
| Sp2           | n |
| Sp6           | n |
| Sp6           | n |
| Sp2           | n |
| Sp6           | n |
| Sp2           | n |
| Sp6           | n |
| Sp2           | n |
| Sp2           | n |
| Sp2           | n |
| Sp6           | n |
| Sp6           | n |
| Sp2           | n |
| Sp6           | n |
| Sp6           | n |
| Sp6           | n |
| Sp2           | n |
| Sp6           | n |
| Osbp17        | n |
| Osbp17        | n |
| Tbx21         | n |
| Tbkbp1        | n |
| Osbp17        | n |
| Osbp17        | n |
| Osbp17        | n |
| Tbkbp1        | n |
| Gpr179        | n |
| Gpr179        | n |
| 4933428G20Rik | n |
| Srcin1        | n |
| 2410003L11Rik | n |
| 2410003L11Rik | n |
| E130012A19Rik | n |
| 2410003L11Rik | n |
| E130012A19Rik | n |
| 2410003L11Rik | n |
| E130012A19Rik | n |
| 2410003L11Rik | n |
| 2410003L11Rik | n |



|               |   |
|---------------|---|
| E130012A19Rik | n |
| E130012A19Rik | n |
| 2410003L11Rik | n |
| E130012A19Rik | n |
| 2410003L11Rik | y |
| 2410003L11Rik | y |
| E130012A19Rik | y |
| E130012A19Rik | y |
| 2410003L11Rik | y |
| 2410003L11Rik | y |
| E130012A19Rik | y |
| 2410003L11Rik | y |
| 2410003L11Rik | y |
| E130012A19Rik | y |
| Psmb3         | y |
| Pip4k2b       | n |
| Pip4k2b       | n |
| Rpl19         | n |
| Rpl19         | n |
| Cacnb1        | n |
| Rpl19         | n |
| Cacnb1        | n |
| Cacnb1        | n |
| Rpl19         | n |
| Rpl19         | n |
| Cacnb1        | n |
| Rpl19         | n |
| Cacnb1        | n |
| Cacnb1        | n |
| Rpl19         | n |
| Cacnb1        | n |
| Rpl19         | n |
| Cacnb1        | n |
| Rpl19         | n |
| Cacnb1        | n |
| Rpl19         | y |

|               |   |
|---------------|---|
| Rpl19         | y |
| Cacnb1        | y |
| Cacnb1        | y |
| Ppp1r1b       | n |
| 1700003D09Rik | y |
| 1700003D09Rik | y |
| Ppp1r1b       | y |
| 1700003D09Rik | y |
| Ppp1r1b       | y |
| 1700003D09Rik | y |
| Pgap3         | y |
| Grb7          | y |
| Grb7          | y |
| Grb7          | y |
| Gm12          | y |
| Nr1d1         | n |
| Thra          | n |
| Nr1d1         | n |
| Nr1d1         | n |
| Nr1d1         | n |
| Gm12359       | n |
| Rapgef1       | y |
| Rapgef1       | n |
| Gjd3          | n |
| Rara          | y |
| Gjd3          | y |
| Rara          | y |
| Gjd3          | n |
| Rara          | y |
| Rara          | y |
| Igfbp4        | n |
| Igfbp4        | n |

|               |   |
|---------------|---|
| Igfbp4        | n |
| Ccr7          | n |
| Krt28         | n |
| Krtap31-2     | n |
| Krtap31-2     | n |
| Krtap31-2     | n |
| Gast          | y |
| Fkbp10        | n |
| Jup           | n |
| Fkbp10        | n |
| Acly          | n |
| Ttc25         | n |
| Ttc25         | n |
| Zfp385c       | n |
| Zfp385c       | n |
| Zfp385c       | n |
| Nkiras2       | n |
| Hspb9         | n |
| Hspb9         | n |
| Hspb9         | n |
| Dhx58         | n |
| Stat5b        | n |
| Atp6v0a1      | n |
| Fam134c       | n |
| Tubg2         | n |
| Plekh3        | n |
| Ezh1          | y |
| Wnk4          | n |
| Coa3          | n |
| Coa3          | n |
| Nbr1          | n |
| Arl4d         | n |
| Arl4d         | n |
| Etv4          | n |
| Arl4d         | n |
| Arl4d         | n |
| Etv4          | n |
| Etv4          | n |
| Meox1         | n |
| 4930417O22Rik | n |
| Meox1         | n |

|               |   |
|---------------|---|
| Meox1         | n |
| 4930417O22Rik | n |
| Meox1         | n |
| Sost          | n |
| Sost          | n |
| 4930417O22Rik | n |
| Cd300lg       | n |
| Cd300lg       | n |
| Cd300lg       | n |
| Hdac5         | n |
| Hdac5         | n |
| BC030867      | n |
| Hdac5         | n |
| BC030867      | n |
| BC030867      | n |
| BC030867      | n |
| Hdac5         | n |
| Hdac5         | n |
| Hdac5         | n |
| BC030867      | n |
| Hdac5         | n |
| BC030867      | n |
| BC030867      | n |
| BC030867      | n |
| Hdac5         | n |
| Tmub2         | n |
| Ubtf          | y |
| Rundc3a       | n |
| Slc25a39      | n |
| Slc25a39      | n |
| Rundc3a       | n |
| Slc25a39      | n |
| Rundc3a       | n |
| Slc25a39      | n |
| Rundc3a       | n |
| Rundc3a       | n |
| Rundc3a       | n |
| Slc25a39      | n |

|               |   |
|---------------|---|
| Fam171a2      | n |
| Fam171a2      | n |
| Grn           | n |
| Fam171a2      | n |
| Itga2b        | n |
| Grn           | n |
| Itga2b        | n |
| Grn           | n |
| Itga2b        | n |
| Itga2b        | n |
| Gm11627       | n |
| Gm11627       | n |
| Fzd2          | n |
| Fzd2          | n |
| 2810433D01Rik | n |
| Fzd2          | n |
| 2810433D01Rik | n |
| Adam11        | n |
| Gjc1          | n |
| Nmt1          | n |
| Nmt1          | n |
| Fmnl1         | n |
| Fmnl1         | n |
| 1700023F06Rik | n |
| Fmnl1         | n |
| 1700023F06Rik | n |
| Fmnl1         | n |
| 1700023F06Rik | n |
| 1700023F06Rik | n |
| Fmnl1         | n |
| Fmnl1         | n |
| Fmnl1         | n |
| 1700023F06Rik | n |
| Wnt9b         | y |

|               |   |
|---------------|---|
| Nsf           | y |
| Mapt          | n |
| Kansl1        | n |
| Kansl1        | n |
| Itgb3         | n |
| Gm11665       | n |
| 1700052K11Rik | n |
| Tlk2          | n |
| Mrc2          | y |
| Mrc2          | y |
| 10-Mar        | y |
| 10-Mar        | y |
| Mrc2          | n |
| Mrc2          | n |
| 10-Mar        | n |
| Mrc2          | n |
| Mrc2          | n |
| 10-Mar        | n |
| Scn4a         | n |
| Icam2         | n |
| 2310007L24Rik | n |
| 2310007L24Rik | n |
| 2310007L24Rik | n |
| Icam2         | n |
| 2310007L24Rik | n |
| 2310007L24Rik | n |
| Icam2         | n |
| Snord104      | n |
| Milr1         | n |
| Milr1         | n |
| Milr1         | n |
| Pecam1        | n |
| Pecam1        | n |
| Milr1         | n |
| Polg2         | n |
| 1810010H24Rik | y |
| 1810010H24Rik | y |
| 1810010H24Rik | y |
| Bptf          | y |
| Bptf          | y |
| Bptf          | y |

|               |   |
|---------------|---|
| Psm12         | n |
| Psm12         | n |
| Helz          | y |
| Pitpnc1       | y |
| Helz          | y |
| Cacng1        | n |
| Cacng1        | n |
| Helz          | n |
| Prkca         | n |
| Prkca         | y |
| Arsg          | y |
| Wipi1         | n |
| Map2k6        | n |
| Sox9          | n |
| Sox9          | n |
| BC006965      | n |
| BC006965      | n |
| BC006965      | n |
| 2610035D17Rik | n |
| Sox9          | n |
| Sstr2         | n |
| Sstr2         | n |
| Slc39a11      | n |
| Fam104a       | y |
| Fam104a       | n |
| Fam104a       | n |
| Fam104a       | n |
| D11Wsu47e     | n |
| Cpsf4l        | n |
| Cpsf4l        | n |
| D11Wsu47e     | y |
| Cpsf4l        | y |
| Cpsf4l        | y |
| Cpsf4l        | y |
| D11Wsu47e     | n |
| D11Wsu47e     | n |
| D11Wsu47e     | n |
| Sdk2          | n |
| D11Wsu47e     | n |
| D11Wsu47e     | n |
| Sdk2          | n |

|               |   |
|---------------|---|
| Sdk2          | n |
| D11Wsu47e     | n |
| Sdk2          | n |
| Sdk2          | n |
| D11Wsu47e     | n |
| D11Wsu47e     | n |
| Sdk2          | n |
| D11Wsu47e     | n |
| Sdk2          | n |
| D11Wsu47e     | n |
| 1700092K14Rik | n |
| 1700092K14Rik | n |
| Mir466n       | n |
| 1700092K14Rik | n |
| Rpl38         | n |
| Rpl38         | n |
| Mir466n       | n |
| Mir466n       | n |
| Mir466n       | n |
| Rpl38         | n |
| Mir466n       | y |
| Rpl38         | y |
| Mir466n       | y |
| Kif19a        | n |
| Btbd17        | n |
| Btbd17        | n |
| Kif19a        | n |
| Gprc5c        | n |
| Btbd17        | n |
| Cd300lb       | n |
| Cd300lb       | n |
| Rab37         | n |
| Rab37         | n |
| Rab37         | n |



|               |   |
|---------------|---|
| Cd300lf       | n |
| Slc9a3r1      | n |
| Nat9          | n |
| Grin2c        | n |
| Grin2c        | n |
| Hid1          | n |
| 4933422H20Rik | n |
| 2310067B10Rik | y |
| 2310067B10Rik | y |
| 2310067B10Rik | y |
| 2310067B10Rik | n |
| Caskin2       | n |
| Caskin2       | n |
| Caskin2       | n |
| 2310067B10Rik | n |
| Caskin2       | n |
| 2310067B10Rik | n |
| Caskin2       | n |
| 2310067B10Rik | n |
| Tsen54        | n |
| Caskin2       | n |
| Caskin2       | n |
| Caskin2       | n |
| Tsen54        | n |
| Tsen54        | y |
| Smim5         | n |
| Recql5        | n |
| Smim5         | n |
| Itgb4         | y |
| Galk1         | y |
| Itgb4         | n |

|         |   |
|---------|---|
| Galk1   | n |
| Unk     | n |
| Trim47  | n |
| Unk     | n |
| Unk     | n |
| Unk     | n |
| Trim47  | n |
| Unk     | n |
| Trim47  | n |
| Unk     | n |
| Unk     | n |
| Trim47  | n |
| Trim47  | n |
| Trim47  | n |
| Unk     | n |
| Unk     | n |
| Unk     | n |
| Trim47  | n |
| Trim47  | y |
| Unk     | n |
| Trim65  | n |
| Cdk3-ps | n |
| Evpl    | n |
| Cdk3-ps | n |
| Evpl    | n |
| Galr2   | y |
| Ubal2   | n |
| Qrich2  | n |
| Prpsap1 | n |

|               |   |
|---------------|---|
| Prpsap1       | n |
| Prpsap1       | n |
| Prpsap1       | n |
| Ube2o         | n |
| Ube2o         | n |
| Sphk1         | y |
| Aanat         | n |
| Ube2o         | n |
| Cygb          | n |
| Gm11744       | n |
| Cygb          | n |
| Cygb          | n |
| Gm11744       | n |
| Cygb          | n |
| Cygb          | y |
| Cygb          | y |
| 1810032O08Rik | n |
| St6galnac2    | n |
| St6galnac2    | y |
| St6galnac2    | y |
| 1810032O08Rik | y |
| 1810032O08Rik | y |
| St6galnac2    | y |
| BC018473      | n |
| Mettl23       | n |
| Mxra7         | n |
| Mxra7         | n |
| Mettl23       | n |
| Mettl23       | y |
| Mettl23       | y |
| Mettl23       | y |
| Mxra7         | y |
| Mettl23       | y |
| Mgat5b        | n |
| Mgat5b        | n |
| Srsf2         | n |
| Mgat5b        | n |
| 2810008D09Rik | n |

|               |       |   |
|---------------|-------|---|
| Srsf2         |       | n |
| 2810008D09Rik |       | n |
| Srsf2         |       | n |
| Srsf2         |       | n |
| Sec14I1       |       | n |
| Sec14I1       |       | n |
| Srsf2         |       | n |
| Srsf2         |       | y |
| Srsf2         |       | n |
| Srsf2         |       | n |
|               | 9-Sep | n |
| Srsf2         |       | n |
|               | 9-Sep | n |
| Srsf2         |       | n |
|               | 9-Sep | n |
| Srsf2         |       | n |
|               | 9-Sep | n |
| Srsf2         |       | y |
| Srsf2         |       | y |
|               | 9-Sep | n |
| Tmc6          |       | n |
|               | 9-Sep | n |
| Tmc6          |       | n |
|               | 9-Sep | n |
| Tmc6          |       | n |
|               | 9-Sep | n |
| Tmc6          |       | n |
|               | 9-Sep | n |
| Tmc6          |       | n |



|               |   |
|---------------|---|
| Cbx2          | n |
| Cbx2          | n |
| Cbx4          | n |
| Cbx2          | n |
| Cbx4          | n |
| Cbx4          | n |
| Cbx2          | n |
| Cbx4          | n |
| Cbx2          | n |
| Cbx4          | n |
| Cbx4          | n |
| Cbx4          | n |
| Cbx2          | n |
| Ccdc40        | n |
| Tbc1d16       | n |
| Tbc1d16       | n |
| Tbc1d16       | n |
| Eif4a3        | y |
| Slc26a11      | n |
| Slc26a11      | n |
| Gm11762       | n |
| Mir5098       | y |
| Rptoros       | y |
| Aatk          | n |
| Aatk          | n |
| Mir3065       | n |
| Mir3065       | n |
| Mir3065       | n |
| Aatk          | n |
| Mir3065       | y |
| Mir3065       | y |
| Aatk          | y |
| Aatk          | y |
| Mir3065       | y |
| Bahcc1        | n |
| 2810410L24Rik | n |
| Bahcc1        | n |



|               |   |
|---------------|---|
| Bahcc1        | n |
| 2810410L24Rik | n |
| 2810410L24Rik | n |
| Actg1         | n |
| Bahcc1        | n |
| Actg1         | n |
| Actg1         | n |
| 0610009L18Rik | n |
| Actg1         | n |
| Gcgr          | n |
| Fam195b       | n |
| Aspscr1       | y |
| Aspscr1       | y |
| Aspscr1       | n |
| Gps1          | n |
| Csnk1d        | y |
| Csnk1d        | y |
| Slc16a3       | n |
| B3gnt1        | y |
| Ptchd3        | y |
| Ptchd3        | y |
| Kif3c         | y |
| 1110002L01Rik | y |
| 1110002L01Rik | y |
| Dtnb          | n |
| Dtnb          | n |
| 1110002L01Rik | n |
| 1110002L01Rik | n |
| Dnmt3a        | n |
| Dnmt3a        | n |
| Dnmt3aos      | n |
| Dnmt3aos      | n |
| Dnmt3aos      | n |
| Efr3b         | n |
| Efr3b         | n |
| Adcy3         | y |
| Cenpo         | y |



|               |   |
|---------------|---|
| Adcy3         | y |
| Cenpo         | y |
| Adcy3         | n |
| Adcy3         | n |
| Fam228a       | n |
| Atad2b        | y |
| Hs1bp3        | n |
| Hs1bp3        | n |
| Hs1bp3        | n |
| Gdf7          | n |
| Gdf7          | n |
| Hs1bp3        | n |
| Rhob          | n |
| Rhob          | n |
| Rhob          | y |
| Rhob          | y |
| Rhob          | y |
| Sdc1          | n |
| Sdc1          | n |
| Slc7a15       | n |
| Lptm4a        | n |
| 1700022H16Rik | y |
| Msgn1         | n |
| Fam49a        | n |
| 4921511I17Rik | n |
| 4921511I17Rik | n |
| Fam49a        | n |
| Fam49a        | n |
| Mycn          | n |
| Fam49a        | n |

|               |   |
|---------------|---|
| Fam49a        | n |
| Mycn          | n |
| Mycn          | n |
| Fam49a        | n |
| Fam49a        | n |
| Fam49a        | n |
| Mycn          | n |
| Mycn          | n |
| Fam49a        | n |
| Nbas          | n |
| Mycn          | n |
| Mycn          | n |
| Nbas          | n |
| Mycn          | n |
| Nbas          | n |
| Nbas          | n |
| Mycn          | n |
| Mycn          | n |
| Mycn          | n |
| Nbas          | n |
| Mycn          | n |
| Nbas          | n |
| Fam84a        | n |
| Trib2         | n |
| Ntsr2         | n |
| E2f6          | n |
| Pq1c3         | n |
| Atp6v1c2      | n |
| Atp6v1c2      | n |
| Hpcal1        | n |
| Atp6v1c2      | n |
| Hpcal1        | n |
| Atp6v1c2      | n |
| 5730507C01Rik | n |
| 5730507C01Rik | n |
| 5730507C01Rik | n |
| Asap2         | n |
| Itgb1bp1      | n |

|               |   |
|---------------|---|
| Itgb1bp1      | n |
| Asap2         | n |
| Asap2         | n |
| Asap2         | n |
| Itgb1bp1      | n |
| Itgb1bp1      | n |
| Rrm2          | n |
| Mboat2        | n |
| Kidins220     | n |
| Id2           | n |
| Gm17746       | n |
| Id2           | n |
| Id2           | n |
| Gm17746       | n |
| Id2           | n |
| Id2           | n |
| Id2           | n |
| 4930480M12Rik | n |
| 4930480M12Rik | n |
| 4930480M12Rik | n |
| Rnaseh1       | n |
| Colec11       | n |
| Tssc1         | n |
| Pik3cg        | n |
| 4933406C10Rik | n |
| Sypl          | n |
| Sypl          | n |
| Sypl          | n |
| Cdhr3         | n |
| Atxn7l1       | n |
| F730043M19Rik | n |
| F730043M19Rik | y |
| Twist1        | n |
| Twist1        | n |
| Snx13         | n |
| Lrrn3         | n |
| Lrrn3         | n |

|               |   |
|---------------|---|
| Nrcam         | y |
| Nrcam         | y |
| Nrcam         | y |
| 3110039M20Rik | n |
| Nubpl         | n |
| Gpr33         | n |
| 1700031P21Rik | n |
| Akap6         | n |
| Akap6         | n |
| Egln3         | n |
| Nfkbia        | n |
| Nfkbia        | y |
| Nfkbia        | y |
| Mir1198       | y |
| Nfkbia        | y |
| Nfkbia        | y |
| Pax9          | n |
| Clec14a       | y |
| Lrr1          | n |
| 5830428M24Rik | n |
| F730035M05Rik | n |
| 3110056K07Rik | n |
| 3110056K07Rik | n |
| 3110056K07Rik | n |
| Timm9         | y |
| Timm9         | y |
| Timm9         | n |
| Timm9         | n |
| L3hypdh       | n |
| Ppm1a         | n |
| Slc38a6       | n |
| D830013O20Rik | n |
| D830013O20Rik | n |
| Slc38a6       | n |
| Slc38a6       | n |

|               |   |
|---------------|---|
| D830013O20Rik | n |
| D830013O20Rik | n |
| 2210039B01Rik | n |
| 2210039B01Rik | n |
| Tmem30b       | n |
| Tmem30b       | y |
| Tmem30b       | y |
| Tmem30b       | y |
| Tmem30b       | n |
| Tmem30b       | n |
| Syne2         | n |
| Syne2         | n |
| Sgpp1         | n |
| Sgpp1         | n |
| Esr2          | n |
| Esr2          | n |
| Tex21         | n |
| Tex21         | n |
| Tex21         | n |
| Zbtb25        | y |
| Mir5135       | n |
| Mir5135       | n |
| Plekhg3       | n |
| Plekhg3       | n |
| AI463170      | n |
| AI463170      | n |
| AI463170      | n |
| Plekhg3       | n |
| AI463170      | n |
| Plekhg3       | n |
| AI463170      | n |
| Plekhg3       | n |
| AI463170      | n |
| Plekhg3       | n |
| AI463170      | n |
| AI463170      | n |
| Sptb          | n |
| Churc1        | n |
| Fntb          | n |
| Max           | n |
| Fntb          | n |

|          |   |
|----------|---|
| Fut8     | n |
| Mpp5     | n |
| Rad51b   | n |
| Zfp36l1  | n |
| Rad51b   | n |
| Zfp36l1  | n |
| Rad51b   | n |
| Zfp36l1  | n |
| Rad51b   | n |
| Exd2     | n |
| Srsf5    | n |
| Smoc1    | n |
| Smoc1    | y |
| Smoc1    | y |
| Cox16    | y |
| Map3k9   | n |
| Pcnx     | n |
| Pcnx     | y |
| Rgs6     | n |
| Acot1    | n |
| Pnma1    | y |
| Elmsan1  | n |
| Ptgr2    | n |
| Vrtn     | n |
| Syndig1l | n |
| Dlst     | n |
| Dlst     | n |
| Dlst     | n |
| Rps6kl1  | n |
| Dlst     | n |
| Rps6kl1  | n |
| Rps6kl1  | n |
| Eif2b2   | n |
| Zc2hc1c  | y |

|         |   |
|---------|---|
| Tmed10  | n |
| Tmed10  | n |
| Fos     | n |
| Tmed10  | y |
| Tmed10  | y |
| Tmed10  | y |
| Ttll5   | n |
| Tgfb3   | n |
| Angel1  | n |
| Lrrc74a | n |
| Lrrc74a | n |
| Lrrc74a | n |
| Angel1  | n |
| Lrrc74a | n |
| Irf2bpl | n |
| Cipc    | n |
| Irf2bpl | n |
| Cipc    | n |
| Irf2bpl | n |
| Irf2bpl | n |
| Cipc    | n |
| Irf2bpl | n |
| Irf2bpl | n |
| Cipc    | n |
| Irf2bpl | n |
| Cipc    | n |
| Irf2bpl | n |
| Cipc    | n |
| Irf2bpl | n |
| Cipc    | n |
| Cipc    | n |

|               |   |
|---------------|---|
| Cipc          | n |
| Irf2bpl       | n |
| Cipc          | n |
| Zdhhc22       | y |
| Ston2         | n |
| Ston2         | n |
| 1700019M22Rik | y |
| 1700019M22Rik | n |
| Gpr65         | n |
| Ptpn21        | n |
| Ttc8          | n |
| Ttc8          | n |
| Ttc8          | n |
| Foxn3         | n |
| Ttc8          | n |
| Foxn3         | n |
| Foxn3         | n |
| Foxn3         | n |
| Tdp1          | n |
| Efcab11       | n |
| Efcab11       | n |
| Efcab11       | n |
| Calm1         | n |
| Gm10432       | n |
| Ttc7b         | n |
| Gm10432       | n |
| Ttc7b         | n |
| Gm10432       | n |
| Ttc7b         | n |
| Gpr68         | n |
| 9030617O03Rik | y |
| 9030617O03Rik | y |
| Gpr68         | y |
| 9030617O03Rik | n |
| 9030617O03Rik | n |
| 9030617O03Rik | n |
| Ccdc88c       | n |
| Ccdc88c       | n |
| Ccdc88c       | n |
| D130020L05Rik | n |
| Rin3          | y |



|               |   |
|---------------|---|
| Rin3          | n |
| Lgmn          | n |
| Lgmn          | n |
| Lgmn          | n |
| Itpk1         | n |
| Tmem251       | n |
| Tmem251       | n |
| Itpk1         | n |
| Prima1        | y |
| Asb2          | n |
| Asb2          | y |
| Fam181a       | y |
| Otub2         | n |
| Dicer1        | n |
| Clmn          | n |
| Clmn          | n |
| Glrx5         | n |
| Tunar         | n |
| Atg2b         | y |
| Vrk1          | n |
| Vrk1          | n |
| Vrk1          | n |
| Atg2b         | n |
| 4933406K04Rik | n |
| Ccnk          | n |
| Ccnk          | n |
| Ccdc85c       | n |
| Ccdc85c       | n |
| Ccnk          | n |
| Ccdc85c       | n |
| Ccnk          | n |
| Ccnk          | n |
| Ccdc85c       | n |
| Ccdc85c       | n |
| Hhip1         | n |

|               |   |
|---------------|---|
| Ccdc85c       | n |
| Ccdc85c       | y |
| Hhip1         | n |
| Ccdc85c       | n |
| Ccdc85c       | n |
| Hhip1         | n |
| Hhip1         | n |
| Ccdc85c       | n |
| Hhip1         | n |
| Ccdc85c       | n |
| Cyp46a1       | n |
| Slc25a29      | y |
| Slc25a29      | y |
| Wdr25         | n |
| Begain        | n |
| Begain        | n |
| Mir3544       | n |
| Mir3544       | y |
| Mir3544       | y |
| Mir3544       | n |
| Meg3          | n |
| Meg3          | n |
| Rian          | n |
| 3110009F21Rik | n |
| Hsp90aa1      | n |
| Rcor1         | n |
| Rcor1         | n |
| Ankrd9        | n |
| Rcor1         | n |
| Cdc42bpb      | n |
| Amn           | n |
| Amn           | n |
| Cdc42bpb      | n |
| A230065H16Rik | y |
| A230065H16Rik | n |
| Cdc42bpb      | n |
| A230065H16Rik | n |
| Cdc42bpb      | n |

|         |   |
|---------|---|
| Tnfaip2 | n |
| Gm266   | n |
| Tnfaip2 | n |
| Gm266   | n |
| Tnfaip2 | n |
| Ckb     | n |
| Trmt61a | y |
| Trmt61a | y |
| Ckb     | y |
| Ckb     | y |
| Trmt61a | y |
| Ckb     | y |
| Ckb     | y |
| Trmt61a | y |
| Ckb     | y |
| Trmt61a | y |
| Ckb     | y |
| Trmt61a | y |
| Ckb     | y |
| Trmt61a | y |
| Trmt61a | y |
| Ckb     | y |
| Trmt61a | n |
| Trmt61a | n |
| Trmt61a | n |
| Bag5    | n |

|               |   |
|---------------|---|
| Bag5          | n |
| Bag5          | n |
| Tdrd9         | n |
| Tdrd9         | n |
| Kif26a        | y |
| Kif26a        | n |
| Mir3073b      | n |
| A730018C14Rik | n |
| A530016L24Rik | n |
| Tmem179       | n |
| Tmem179       | n |
| Inf2          | n |
| Inf2          | n |
| Tmem179       | n |
| Tmem179       | n |
| Inf2          | n |
| Inf2          | n |
| Siva1         | n |
| Zbtb42        | n |
| Zbtb42        | n |
| Akt1          | n |
| Cep170b       | y |
| Akt1          | y |
| BC022687      | n |
| BC022687      | n |
| Gpr132        | n |
| BC022687      | n |
| Btbd6         | y |
| Btbd6         | y |
| Jag2          | y |
| Btbd6         | y |
| Jag2          | y |
| Btbd6         | n |
| Btbd6         | n |
| Nudt14        | n |
| Btbd6         | n |
| Nudt14        | n |
| Nudt14        | n |

|               |   |
|---------------|---|
| Nudt14        | n |
| Btbd6         | n |
| Nudt14        | n |
| Brf1          | n |
| Tmem121       | n |
| Brf1          | n |
| Brf1          | n |
| Gm10421       | n |
| Dnah11        | n |
| Rapgef5       | n |
| Dnah11        | n |
| Cdca7l        | n |
| Cdca7l        | n |
| Cdca7l        | y |
| Sp8           | n |
| D230030E09Rik | n |
| D230030E09Rik | n |
| D230030E09Rik | n |
| Sp8           | n |
| Fam208b       | n |
| Klf6          | n |
| Wdr37         | n |
| Dip2c         | n |
| Chrm3         | n |
| Dip2c         | y |
| Ryr2          | n |
| Actn2         | n |
| 4933412O06Rik | n |
| Gli3          | n |
| Mir466i       | n |
| Mir466i       | n |
| Pou6f2        | n |
| Sfrp4         | n |

|               |   |
|---------------|---|
| Stard3nl      | n |
| Nme8          | y |
| Nme8          | y |
| Nme8          | y |
| Aoah          | n |
| Olfr1368      | n |
| Olfr1368      | n |
| Hist1h2bq     | n |
| Zfp184        | n |
| Mir1983       | n |
| Pom121l2      | y |
| Pom121l2      | y |
| Prss16        | y |
| Hist1h2bk     | n |
| Cmah          | n |
| Cmah          | n |
| Gpld1         | n |
| Aldh5a1       | n |
| Aldh5a1       | n |
| A330102l10Rik | n |
| Exoc2         | n |
| Exoc2         | n |
| Gmds          | n |
| Gmds          | n |
| Gmds          | n |
| Foxc1         | n |
| Gmds          | n |
| Foxc1         | n |
| Gmds          | n |
| Gmds          | n |
| Gmds          | n |
| Foxc1         | n |
| Gmds          | n |
| Gmds          | n |
| Gmds          | n |
| Foxc1         | n |
| Foxc1         | n |
| Mylk4         | n |

|               |   |
|---------------|---|
| 4930447K03Rik | n |
| Psmg4         | n |
| Slc22a23      | n |
| Psmg4         | n |
| Gm15908       | y |
| Gm15908       | y |
| Pxdc1         | n |
| Ppp1r3g       | y |
| Fars2         | n |
| F13a1         | n |
| Ly86          | n |
| F13a1         | n |
| F13a1         | n |
| F13a1         | n |
| Ssr1          | n |
| Rreb1         | n |
| Ssr1          | n |
| Cage1         | n |
| Bmp6          | n |
| Tfap2a        | n |
| Tfap2a        | n |
| Tfap2a        | y |
| Gm26688       | n |
| Gm26688       | n |
| Tfap2a        | n |
| Gcnt2         | n |
| Tmem170b      | n |
| Tbc1d7        | n |
| Gfod1         | n |
| Gfod1         | n |
| Gfod1         | n |
| Nol7          | n |

|               |   |
|---------------|---|
| Nol7          | n |
| Rnf182        | n |
| Mcur1         | n |
| Mcur1         | n |
| Cd83          | n |
| A330076C08Rik | n |
| Gm5083        | n |
| A330076C08Rik | n |
| A330076C08Rik | n |
| Gm5083        | n |
| A330076C08Rik | n |
| 1700029N11Rik | n |
| A330076C08Rik | n |
| A330076C08Rik | n |
| 1700029N11Rik | n |
| Dtnbp1        | n |
| Jarid2        | n |
| Dtnbp1        | n |
| Jarid2        | y |
| Mylip         | n |
| Atxn1         | n |
| Cap2          | y |
| Cap2          | y |
| Nup153        | n |
| C78339        | n |
| Kdm1b         | n |
| Kdm1b         | n |
| Nhlrc1        | n |
| A930002C04Rik | n |
| A930002C04Rik | n |
| Rnf144b       | n |
| Rnf144b       | n |
| A930002C04Rik | n |
| 4931429P17Rik | n |



|               |   |
|---------------|---|
| Phf2          | n |
| Phf2          | n |
| Phf2          | n |
| Ninj1         | y |
| Wnk2          | y |
| Fgd3          | n |
| Bicd2         | n |
| Fgd3          | n |
| lars          | n |
| lars          | n |
| Cenpp         | n |
| 9430083A17Rik | n |
| Shc3          | n |
| Sema4d        | n |
| Sema4d        | n |
| Gadd45g       | n |
| Gadd45g       | n |
| Sema4d        | n |
| Gadd45g       | n |
| Sema4d        | n |
| Gadd45g       | n |
| Sema4d        | n |
| Gadd45g       | n |
| Gadd45g       | n |
| 4921525O09Rik | n |
| 4921525O09Rik | n |
| Sema4d        | n |
| 4921525O09Rik | n |
| Syk           | n |
| Gm2848        | n |
| Gm2848        | n |
| Syk           | n |
| Nfil3         | n |
| Ror2          | n |
| Ror2          | n |
| Gm2762        | n |
| Ror2          | n |
| Gm2762        | n |

|          |   |
|----------|---|
| Gm2762   | n |
| Ror2     | n |
| Gm2762   | n |
| Ror2     | n |
| Ror2     | n |
| Gm2762   | n |
| Ror2     | n |
| Gm2762   | n |
| Drd1     | n |
| Hrh2     | n |
| Drd1     | n |
| Hrh2     | n |
| Thoc3    | n |
| Nop16    | y |
| Unc5a    | n |
| Unc5a    | n |
| Fgfr4    | n |
| Uimc1    | n |
| Uimc1    | n |
| Nsd1     | y |
| Rab24    | y |
| Nsd1     | y |
| Rab24    | y |
| Nsd1     | y |
| Nsd1     | y |
| Nsd1     | y |
| Rab24    | y |
| Pfn3     | y |
| Dbn1     | y |
| Dok3     | n |
| Prr7     | n |
| Tmed9    | y |
| Tmed9    | y |
| Tmed9    | y |
| Catsper3 | n |
| Pitx1    | n |
| H2afy    | n |
| H2afy    | n |

|               |   |
|---------------|---|
| Catsper3      | n |
| H2afy         | n |
| H2afy         | n |
| H2afy         | n |
| Catsper3      | n |
| H2afy         | n |
| H2afy         | n |
| Catsper3      | n |
| Catsper3      | n |
| H2afy         | n |
| Gm10782       | n |
| Tifab         | n |
| Gm10782       | n |
| Slc25a48      | y |
| Lect2         | y |
| Smad5         | y |
| Smad5         | y |
| Trpc7         | y |
| Trpc7         | n |
| Spock1        | n |
| Spock1        | n |
| Spock1        | n |
| 1700066J03Rik | n |
| 1700066J03Rik | n |
| Klhl3         | n |
| 1700066J03Rik | n |
| Hnrnpa0       | n |
| Agtpbp1       | n |
| Agtpbp1       | n |
| Spata31d1d    | n |
| Spata31d1d    | n |
| Spata31d1d    | n |
| 4930528D03Rik | n |
| Gas1          | n |
| Gas1          | n |

|               |   |
|---------------|---|
| Gas1          | n |
| BC051665      | n |
| BC051665      | n |
| Cts3          | n |
| Cts3          | n |
| Fbp2          | y |
| 2010111I01Rik | y |
| Fbp1          | y |
| 2010111I01Rik | n |
| Fbp1          | n |
| 2010111I01Rik | n |
| 2010111I01Rik | n |
| Gm16907       | n |
| Gm16907       | n |
| 2010111I01Rik | n |
| Ptch1         | n |
| Ercc6l2       | n |
| Habp4         | n |
| Habp4         | n |
| Hsd17b3       | n |
| Habp4         | n |
| Hsd17b3       | n |
| Zfp367        | y |
| Zfp367        | y |
| Habp4         | y |
| Zfp367        | y |
| Habp4         | y |
| Habp4         | y |
| Zfp367        | y |
| 2410141K09Rik | n |
| BC048507      | n |
| 4930525G20Rik | n |
| 1700001L19Rik | n |
| Nsun2         | n |
| Ube2ql1       | n |
| Ube2ql1       | n |
| 4930520P13Rik | n |

|               |   |
|---------------|---|
| 1700100L14Rik | n |
| 8030423J24Rik | n |
| Mir466f-4     | n |
| Irx2          | n |
| Irx4          | n |
| Lpcat1        | n |
| Zfp825        | n |
| Zfp825        | n |
| Ell2          | n |
| Mctp1         | n |
| Ankrd32       | n |
| 9330111N05Rik | n |
| Mir3961       | n |
| Arsb          | n |
| AW495222      | n |
| Arsb          | n |
| Lhfpl2        | n |
| Lhfpl2        | n |
| Scamp1        | n |
| Ap3b1         | n |
| Gm9776        | n |
| Ap3b1         | n |
| Gm9776        | n |
| Ap3b1         | n |
| Gm9776        | n |
| Gm9776        | n |
| Tbca          | n |
| Pde8b         | n |
| Zbed3         | n |
| F2r           | n |
| F2rl2         | n |
| F2rl2         | n |
| F2r           | y |
| F2r           | y |
| F2rl2         | n |

|               |   |
|---------------|---|
| Sv2c          | n |
| Sv2c          | n |
| Gcnt4         | y |
| 1700029F12Rik | n |
| Fam169a       | n |
| Fam169a       | y |
| Enc1          | n |
| Enc1          | n |
| Enc1          | n |
| Hexb          | n |
| Hexb          | n |
| Enc1          | n |
| Hexb          | n |
| Lincenc1      | n |
| Hexb          | n |
| Lincenc1      | n |
| Lincenc1      | n |
| Lincenc1      | n |
| Hexb          | n |
| Hexb          | n |
| Arhgef28      | n |
| Arhgef28      | n |
| 2310005E17Rik | n |
| Foxd1         | n |
| Tmem171       | n |
| Zfp366        | n |
| Taf9          | y |
| Taf9          | n |
| Taf9          | n |
| Marveld2      | n |
| 5930438M14Rik | n |
| 4933416M06Rik | y |
| Pik3r1        | n |
| 4933416M06Rik | n |
| Pik3r1        | n |
| Pik3r1        | n |
| Mast4         | n |

|               |   |
|---------------|---|
| Nln           | y |
| Trim23        | n |
| Cwc27         | n |
| Htr1a         | n |
| 1700006H21Rik | n |
| 1700006H21Rik | n |
| Ercc8         | n |
| Ndufaf2       | n |
| Rab3c         | n |
| Pde4d         | n |
| Pde4d         | n |
| Actbl2        | n |
| Actbl2        | n |
| 3110015C05Rik | n |
| Mier3         | n |
| Gpbp1         | n |
| Gm15326       | n |
| Map3k1        | n |
| Map3k1        | n |
| Ankrd55       | n |
| Il6st         | n |
| Il6st         | n |
| Il31ra        | n |
| Ddx4          | n |
| Gpx8          | y |
| Esm1          | n |
| Esm1          | n |
| Snx18         | n |
| Arl15         | n |
| Arl15         | n |
| Arl15         | y |
| Snx18         | y |
| Snx18         | y |
| Hspb3         | y |
| Hspb3         | y |
| Arl15         | n |
| Itga2         | n |
| Itga2         | n |

|               |   |
|---------------|---|
| Gm6416        | y |
| Parp8         | n |
| Parp8         | n |
| Emb           | y |
| Emb           | y |
| Parp8         | y |
| Emb           | y |
| Emb           | y |
| Hcn1          | n |
| 4933413L06Rik | n |
| Hcn1          | n |
| 4933413L06Rik | n |
| Hcn1          | n |
| Hcn1          | n |
| Hcn1          | n |
| 4933413L06Rik | n |
| 4933413L06Rik | n |
| Nim1k         | n |
| Hmgcs1        | n |
| Hmgcs1        | n |
| Hmgcs1        | n |
| Gm3500        | n |
| Flnb          | n |
| Dnase1l3      | y |
| Acox2         | n |
| Fhit          | n |
| Mnd1-ps       | n |
| Ptprg         | n |
| Thoc7         | n |
| Atxn7         | n |
| Atxn7         | n |
| Thoc7         | n |
| Il3ra         | y |
| Olf720        | y |
| Olf720        | y |
| Slc4a7        | n |
| Slc4a7        | n |
| Nkiras1       | n |
| Ube2e2        | n |
| Ube2e2        | n |
| 2700060E02Rik | n |



|               |   |
|---------------|---|
| Nid2          | y |
| 2700060E02Rik | y |
| Nid2          | y |
| D14Ertd670e   | y |
| Gng2          | y |
| D14Ertd670e   | y |
| D14Ertd670e   | y |
| Nudt13        | n |
| 1810062O18Rik | n |
| Synpo2l       | n |
| Synpo2l       | n |
| Zswim8        | n |
| Camk2g        | n |
| Zswim8        | n |
| Camk2g        | n |
| Zswim8        | n |
| Camk2g        | n |
| Camk2g        | n |
| Ap3m1         | n |
| Kat6b         | n |
| Dupd1         | n |
| Dupd1         | n |
| Dupd1         | n |
| Vdac2         | n |
| Vdac2         | n |
| Comtd1        | n |
| Comtd1        | n |
| Zfp503        | n |
| 1700112E06Rik | n |
| 1700112E06Rik | y |
| 1700112E06Rik | y |
| Zfp503        | y |
| 1700112E06Rik | y |
| Zfp503        | y |

|               |   |
|---------------|---|
| Zfp503        | y |
| Zfp503        | y |
| 1700112E06Rik | y |
| Zfp503        | y |
| 1700112E06Rik | y |
| Zfp503        | y |
| 1700112E06Rik | y |
| Zfp503        | y |
| Zfp503        | y |
| 1700112E06Rik | y |
| Zfp503        | y |
| Zfp503        | n |
| Zfp503        | n |
| Zfp503        | n |
| 4930405A10Rik | n |
| Polr3a        | n |
| Zmiz1         | n |
| Zmiz1         | n |
| 4930572O13Rik | n |
| 4930572O13Rik | n |
| Zmiz1         | n |
| Zmiz1         | n |
| Zmiz1         | n |
| 4930572O13Rik | n |
| Zmiz1         | n |
| 4930572O13Rik | n |
| 4930572O13Rik | n |
| 4930572O13Rik | n |
| Zmiz1         | n |

|               |   |
|---------------|---|
| 4930572O13Rik | n |
| Zmiz1         | n |
| 4930572O13Rik | n |
| 4930572O13Rik | n |
| Zmiz1         | n |
| 4930572O13Rik | n |
| Ppifos        | n |
| Zmiz1         | n |
| Ppifos        | n |
| Zmiz1         | n |
| Ppifos        | n |
| Zmiz1         | n |
| Ppifos        | n |
| Zmiz1         | n |
| Ppifos        | n |
| Ppifos        | n |
| Ppif          | n |
| Ppif          | n |
| Zcchc24       | n |
| Anxa11        | n |
| Il17rd        | n |
| App1          | n |
| Arhgef3       | n |
| Cacna1d       | n |
| Cacna1d       | n |
| Cacna1d       | y |
| Tkt           | n |
| Prkcd         | n |
| Nt5dc2        | n |
| Bap1          | n |
| Dnah1         | y |
| Capn7         | n |
| Sh3bp5        | n |
| Capn7         | n |

|               |   |
|---------------|---|
| Sh3bp5        | n |
| Colq          | n |
| Btd           | n |
| Dph3          | n |
| Dph3          | n |
| Prrxl1        | n |
| 3425401B19Rik | n |
| Wdfy4         | n |
| Arhgap22      | n |
| Mapk8         | n |
| Syt15         | n |
| Syt15         | y |
| Syt15         | y |
| Gprin2        | y |
| Gm3219        | n |
| Mmrn2         | y |
| Opn4          | n |
| Wapal         | n |
| Wapal         | n |
| Opn4          | n |
| Wapal         | n |
| Opn4          | n |
| Wapal         | n |
| Opn4          | n |
| Wapal         | n |
| Wapal         | n |
| Tspan14       | n |
| Dydc1         | n |
| Fam213a       | n |
| Fam213a       | n |
| Mbl1          | n |
| Ptgdr         | n |
| Styx          | n |
| Gm1821        | n |
| Gm15217       | n |
| Bmp4          | y |
| Rubie         | n |
| Samd4         | y |
| Gm10371       | n |
| Lgals3        | n |
| Dlgap5        | n |

|          |   |
|----------|---|
| Dlgap5   | n |
| Dlgap5   | n |
| Ktn1     | n |
| Atg14    | n |
| Apex1    | n |
| Apex1    | n |
| Klhl33   | n |
| Apex1    | n |
| Klhl33   | n |
| Rnase9   | y |
| Slc39a2  | y |
| Tppp2    | n |
| Rnase13  | n |
| Rnase13  | n |
| Rnase13  | n |
| Gm16617  | n |
| Arhgef40 | n |
| Arhgef40 | n |
| Zfp219   | n |
| Arhgef40 | n |
| Zfp219   | n |
| Hnrnpc   | n |
| Rpgrip1  | n |
| Chd8     | n |
| Sall2    | y |
| Tox4     | y |
| Sall2    | y |
| Tox4     | y |
| Tox4     | y |
| Tox4     | y |
| Abhd4    | n |
| Dad1     | n |
| Abhd4    | n |
| Dad1     | n |
| Slc7a7   | y |
| Mrpl52   | y |



|        |   |
|--------|---|
| Zfhx2  | n |
| Thtpa  | y |
| Thtpa  | n |
| Thtpa  | y |
| Jph4   | y |
| Jph4   | n |
| Thtpa  | n |
| Jph4   | n |
| Thtpa  | n |
| Jph4   | n |
| Thtpa  | n |
| Jph4   | n |
| Thtpa  | y |
| Thtpa  | y |
| Jph4   | y |
| Thtpa  | n |
| Jph4   | n |
| Nop9   | n |
| Ltb4r2 | y |
| Ltb4r2 | y |
| Cideb  | y |
| Cideb  | y |
| Ltb4r1 | y |
| Adcy4  | y |
| Adcy4  | y |
| Ripk3  | y |
| Nfatc4 | y |
| Ripk3  | y |
| Ripk3  | y |
| Ripk3  | y |
| Nfatc4 | y |
| Ripk3  | n |
| Ripk3  | n |
| Ripk3  | n |

|         |   |
|---------|---|
| Ripk3   | n |
| Nfatc4  | n |
| Ripk3   | n |
| Nfatc4  | n |
| Ripk3   | n |
| Gm16973 | n |
| Gjb6    | n |
| Cryl1   | n |
| Cryl1   | n |
| N6amt2  | n |
| N6amt2  | n |
| Il17d   | n |
| Il17d   | n |
| Lats2   | y |
| Lats2   | y |
| Sap18   | y |
| Atp8a2  | n |
| Atp8a2  | n |
| Spata13 | n |
| Sgcg    | n |
| Ebpl    | n |
| Ebpl    | n |
| Dleu2   | n |
| Dleu2   | n |
| Dleu2   | n |
| Kcng    | n |
| Dleu2   | n |
| Kcng    | n |
| Dleu2   | n |
| Dleu2   | n |
| Kcng    | n |
| Dleu2   | n |
| Kcng    | n |



|               |   |
|---------------|---|
| Kcnrg         | n |
| Kcnrg         | n |
| Dleu2         | n |
| Dleu2         | n |
| Dleu2         | n |
| Gucy1b2       | n |
| Defb30        | n |
| Ctsb          | y |
| Fam167a       | n |
| Pinx1         | n |
| 4930578I06Rik | n |
| Sox7          | n |
| 4930578I06Rik | y |
| Sox7          | n |
| Rp111         | n |
| Prss55        | n |
| Prss51        | n |
| Prss55        | n |
| Prss55        | n |
| Prss51        | n |
| Prss52        | n |
| Prss52        | n |
| Prss52        | n |
| Msra          | n |
| Prss52        | n |
| Msra          | n |
| Msra          | n |
| Zfp395        | n |
| Zfp395        | n |
| Scara5        | n |
| Clu           | y |
| Clu           | y |
| Clu           | n |

|               |   |
|---------------|---|
| Bnip3l        | y |
| Ebf2          | n |
| Ebf2          | n |
| Gm6878        | n |
| 4930438E09Rik | n |
| Kctd9         | n |
| Nefl          | y |
| Nefl          | y |
| Nefm          | n |
| Nefm          | n |
| Stc1          | n |
| Nkx2-6        | n |
| Pebp4         | n |
| Rhobtb2       | y |
| Pebp4         | n |
| Rhobtb2       | n |
| Pebp4         | n |
| Ccar2         | n |
| Ccar2         | n |
| Pebp4         | n |
| Pebp4         | n |
| Pebp4         | n |
| Ccar2         | n |
| Ccar2         | n |
| Pebp4         | n |
| Pebp4         | n |
| Ccar2         | n |
| Bin3          | y |
| Bin3          | y |
| Bin3          | y |
| Nudt18        | n |
| Dmtn          | y |

|               |   |
|---------------|---|
| Nudt18        | y |
| Nudt18        | y |
| Dmtn          | y |
| Dmtn          | y |
| Nudt18        | y |
| Fgf17         | y |
| Nudt18        | y |
| Fgf17         | y |
| Fgf17         | y |
| Nudt18        | y |
| Nudt18        | y |
| Nudt18        | n |
| Dok2          | n |
| Xpo7          | n |
| Xpo7          | n |
| 2410012E07Rik | n |
| 4930434J06Rik | n |
| 4930434J06Rik | n |
| Gm9199        | n |
| Gm9199        | n |
| Rcbtb2        | n |
| Med4          | n |
| Tpt1          | n |
| Gm4285        | n |
| Nufip1        | n |
| Gpalpp1       | n |
| Gpalpp1       | n |
| Nufip1        | n |
| Tsc22d1       | n |
| 4930444M15Rik | y |
| 4930444M15Rik | y |
| 4930444M15Rik | y |
| 4930444M15Rik | n |
| 4930444M15Rik | n |
| Serp2         | n |
| 1700108F19Rik | n |
| Enox1         | n |
| Gm6994        | n |

|               |   |
|---------------|---|
| Gm6994        | n |
| Tnfsf11       | n |
| Dgkh          | n |
| Dgkh          | y |
| Vwa8          | y |
| Dgkh          | y |
| Vwa8          | y |
| Dgkh          | y |
| Dgkh          | y |
| Vwa8          | n |
| Vwa8          | n |
| Elf1          | n |
| 9630013A20Rik | n |
| Diap3         | n |
| Pcdh9         | n |
| Uchl3         | n |
| Irg1          | n |
| Slain1        | n |
| Slain1os      | n |
| Slain1os      | n |
| Ednrb         | n |
| Ednrb         | n |
| 5430440P10Rik | n |
| 4930449E01Rik | n |
| 4930449E01Rik | n |
| Mir6390       | n |
| Mir6390       | n |
| Trim52        | n |
| Spry2         | n |
| Trim52        | n |
| Trim52        | n |
| Sox21         | n |
| Sox21         | n |
| Cldn10        | n |
| Cldn10        | n |
| Dzip1         | n |
| Dnajc3        | y |
| Dzip1         | y |
| Dnajc3        | y |
| Dzip1         | y |
| Oxgr1         | n |



|               |   |
|---------------|---|
| Clybl         | n |
| Clybl         | n |
| Zic2          | n |
| Zic5          | n |
| Egflam        | n |
| 2410089E03Rik | n |
| Skp2          | n |
| Prlr          | n |
| Dnajc21       | n |
| Rxfp3         | y |
| Rxfp3         | y |
| Golph3        | n |
| Golph3        | n |
| Pdzd2         | n |
| Gm5468        | n |
| Myo10         | n |
| Basp1         | y |
| Myo10         | n |
| Myo10         | n |
| Otulin        | y |
| Otulin        | y |
| Ank           | n |
| Trio          | n |
| Trio          | n |
| Ank           | n |
| Dnah5         | n |
| Trio          | n |
| Dnah5         | n |
| Trio          | n |
| Ankrd33b      | y |

|          |   |
|----------|---|
| Ankrd33b | y |
| Matn2    | n |
| Rnf19a   | n |
| Spag1    | n |
| Spag1    | n |
| Ankrd46  | n |
| Snx31    | y |
| Pabpc1   | n |
| Grhl2    | n |
| Ywhaz    | n |
| Grhl2    | n |
| Ywhaz    | n |
| Grhl2    | n |
| Grhl2    | y |
| Ncald    | y |
| Ncald    | y |
| Ncald    | y |
| Grhl2    | n |
| Grhl2    | n |
| Ncald    | n |
| Ncald    | n |
| Odf1     | y |
| Ubr5     | y |
| Odf1     | y |
| Ubr5     | y |
| Ubr5     | y |
| Odf1     | n |
| Odf1     | n |
| Odf1     | n |
| Klf10    | n |
| Odf1     | n |
| Odf1     | n |
| Azin1    | n |
| Atp6v1c1 | n |
| Dpys     | n |
| Trhr     | y |
| Tmem74   | y |

|               |   |
|---------------|---|
| 4930523O13Rik | n |
| Eif3h         | n |
| Gm9920        | n |
| Gm9920        | n |
| Deptor        | n |
| Deptor        | n |
| Gm9920        | n |
| Gm9920        | n |
| Gm9920        | n |
| Zhx2          | n |
| Ndufb9        | n |
| Mtss1         | n |
| Mtss1         | n |
| Mtss1         | n |
| Ndufb9        | y |
| Mtss1         | y |
| Mtss1         | y |
| Mtss1         | y |
| Sqle          | n |
| Gm19510       | n |
| Trib1         | n |
| Gm19510       | n |
| Trib1         | n |
| Gm19510       | n |
| Trib1         | n |
| Gm19510       | n |
| Trib1         | n |
| Gm19510       | n |
| Trib1         | n |
| Gm19510       | n |
| Trib1         | n |
| Gm19510       | n |
| Trib1         | n |
| Trib1         | n |
| 9930014A18Rik | n |
| Fam84b        | n |
| Fam84b        | n |
| Fam84b        | n |
| Pvt1          | n |
| Pvt1          | n |
| Pvt1          | n |
| 1700065I16Rik | n |
| 1700065I16Rik | n |



|               |   |
|---------------|---|
| 1700065I16Rik | n |
| 1700065I16Rik | n |
| Gsdmc         | n |
| 1700065I16Rik | n |
| Gsdmc         | n |
| Gsdmcl-ps     | n |
| Asap1         | n |
| Wisp1         | y |
| Wisp1         | n |
| Wisp1         | y |
| St3gal1       | n |
| Wisp1         | n |
| St3gal1       | n |
| St3gal1       | n |
| Gm19782       | n |
| Chrac1        | n |
| Chrac1        | y |
| Dennd3        | n |
| Dennd3        | n |
| Dennd3        | n |
| Ptk2          | n |
| Ptk2          | n |
| Dennd3        | n |
| Dennd3        | n |
| Ptp4a3        | n |
| Gpr20         | n |
| Ptp4a3        | n |
| Ptp4a3        | n |
| Ptp4a3        | n |
| Mroh4         | y |
| Arc           | n |
| 4933427E11Rik | n |
| Lynx1         | n |
| Top1mt        | n |
| Rhpn1         | n |
| Top1mt        | n |
| Rhpn1         | n |
| Rhpn1         | n |

|        |   |
|--------|---|
| Rhpn1  | n |
| Mafa   | n |
| Gsdmd  | n |
| Gsdmd  | n |
| Zc3h3  | n |
| Zc3h3  | n |
| Tigd5  | y |
| Tigd5  | y |
| Tigd5  | y |
| Eef1d  | y |
| Eef1d  | y |
| Mapk15 | y |
| Mapk15 | n |
| Mapk15 | n |
| Mapk15 | y |
| Mapk15 | y |
| Mapk15 | y |
| Nrbp2  | y |
| Plec   | y |
| Plec   | y |
| Grina  | y |
| Plec   | y |
| Grina  | y |
| Plec   | y |
| Grina  | y |
| Plec   | y |
| Grina  | y |
| Grina  | y |
| Plec   | y |
| Plec   | y |
| Plec   | y |
| Grina  | y |
| Grina  | y |
| Parp10 | n |
| Spatc1 | y |
| Mroh1  | n |
| Bop1   | y |
| Scx    | n |
| Scx    | n |
| Bop1   | n |
| Bop1   | n |

|          |   |
|----------|---|
| Scrt1    | n |
| Adck5    | y |
| Kifc2    | n |
| Foxh1    | n |
| Kifc2    | n |
| Foxh1    | n |
| Kifc2    | n |
| Kifc2    | n |
| Foxh1    | n |
| Foxh1    | n |
| Kifc2    | n |
| Kifc2    | n |
| Kifc2    | n |
| Foxh1    | n |
| Foxh1    | n |
| Foxh1    | n |
| Kifc2    | n |
| Kifc2    | n |
| Kifc2    | n |
| Foxh1    | n |
| Kifc2    | n |
| Foxh1    | n |
| Kifc2    | n |
| Kifc2    | n |
| Kifc2    | n |
| Arhgap39 | y |
| Rbfox2   | n |
| Apol10a  | n |
| Apol9b   | n |
| Myh9     | n |
| Apol9b   | n |
| Apol9b   | n |
| Apol9b   | n |
| Txn2     | n |
| Txn2     | n |

|         |   |
|---------|---|
| Ncf4    | n |
| Mpst    | n |
| Tst     | n |
| Mpst    | n |
| Tst     | n |
| Mpst    | n |
| Kctd17  | n |
| Kctd17  | n |
| Tmprss6 | n |
| Kctd17  | n |
| Tmprss6 | n |
| Tmprss6 | n |
| Tmprss6 | n |
| Cyth4   | n |
| Elfn2   | n |
| Cyth4   | n |
| Elfn2   | n |
| Cyth4   | n |
| Cyth4   | n |
| Cyth4   | n |
| Elfn2   | n |
| Card10  | y |
| Card10  | y |

|          |   |
|----------|---|
| Card10   | y |
| Cdc42ep1 | y |
| Cdc42ep1 | y |
| Card10   | y |
| Cdc42ep1 | y |
| Card10   | y |
| Lgals2   | n |
| Cdc42ep1 | y |
| Lgals2   | y |
| Cdc42ep1 | n |
| Lgals2   | n |
| Gga1     | n |
| Gga1     | n |
| Lgals2   | n |
| Lgals2   | n |
| Gga1     | n |
| Pdpx     | n |
| Pdpx     | n |
| Gm10865  | n |
| Triobp   | n |
| Triobp   | n |
| H1f0     | n |
| Ankrd54  | n |
| Maff     | n |
| Kdelr3   | y |
| Sun2     | n |
| Sun2     | n |
| Nptxr    | n |
| Apobec3  | y |
| Cbx7     | y |
| Apobec3  | n |
| Cbx7     | n |
| Cbx7     | n |
| Syng1    | n |

|               |   |
|---------------|---|
| Syng1         | n |
| Pdgfb         | n |
| Syng1         | n |
| Pdgfb         | n |
| Syng1         | n |
| Pdgfb         | n |
| Syng1         | n |
| Rpl3          | n |
| Syng1         | n |
| Syng1         | n |
| Syng1         | n |
| Rpl3          | n |
| Syng1         | n |
| Rpl3          | n |
| Syng1         | n |
| Rpl3          | n |
| Rpl3          | n |
| Rpl3          | n |
| Syng1         | n |
| Syng1         | y |
| Rpl3          | y |
| Rpl3          | y |
| Rpl3          | y |
| Syng1         | y |
| Rpl3          | y |
| Rpl3          | y |
| Rps19bp1      | n |
| Enthd1        | n |
| Enthd1        | n |
| Cacna1i       | n |
| Enthd1        | n |
| A430088P11Rik | n |
| Fam83f        | y |
| Mkl1          | n |
| 4930483J18Rik | n |
| 4930483J18Rik | n |
| Mkl1          | n |

|               |   |
|---------------|---|
| Mkl1          | n |
| Mkl1          | n |
| 4930483J18Rik | y |
| Chadl         | n |
| Csdc2         | n |
| Csdc2         | y |
| Pmm1          | n |
| Shisa8        | n |
| Srebf2        | n |
| Shisa8        | n |
| Gm20324       | y |
| Tcf20         | n |
| Gm20324       | n |
| Tcf20         | n |
| Gm20324       | n |
| Gm20324       | n |
| Mir3080       | n |
| Gm20324       | n |
| Mir3080       | n |
| Gm20324       | n |
| Mir3080       | n |
| Gm20324       | n |
| Mir3080       | n |
| Gm20324       | n |
| Mir3080       | n |
| Gm20324       | n |
| Mir3080       | n |
| Gm20324       | n |
| Mir3080       | n |
| Gm20324       | n |
| Mir3080       | n |
| Gm20324       | n |
| Mir3080       | n |
| Nfam1         | n |
| Nfam1         | n |
| Gm20324       | n |
| Gm20324       | n |

|               |   |
|---------------|---|
| Serhl         | n |
| Serhl         | n |
| Rrp7a         | n |
| A4galt        | y |
| Bik           | n |
| Bik           | n |
| Bik           | y |
| Ttll1         | y |
| Tspo          | y |
| Pnpla5        | n |
| Parvb         | n |
| Pnpla5        | n |
| Parvb         | n |
| Pnpla5        | n |
| Parvb         | n |
| Pnpla5        | n |
| Pnpla5        | n |
| Pnpla5        | n |
| Parvb         | n |
| Pnpla5        | n |
| 1810041L15Rik | n |
| 1810041L15Rik | n |
| Parvg         | n |
| Parvg         | n |
| 1810041L15Rik | n |
| 1810041L15Rik | n |
| Prr5          | n |
| Prr5          | n |
| Arhgap8       | y |
| Gm20556       | y |
| Arhgap8       | n |
| Phf21b        | n |
| Phf21b        | n |
| Arhgap8       | n |



|               |   |
|---------------|---|
| Phf21b        | n |
| Arhgap8       | n |
| Phf21b        | n |
| Arhgap8       | n |
| Phf21b        | n |
| Arhgap8       | n |
| Arhgap8       | n |
| Arhgap8       | n |
| Smc1b         | n |
| Ribc2         | n |
| Atxn10        | y |
| AU022754      | n |
| Wnt7b         | n |
| Wnt7b         | n |
| Wnt7b         | n |
| AU022754      | n |
| AU022754      | n |
| AU022754      | n |
| Cdpf1         | n |
| Celsr1        | n |
| Celsr1        | n |
| Trmu          | n |
| Trmu          | n |
| Celsr1        | n |
| Gramd4        | n |
| Cerk          | n |
| Creld2        | n |
| Panx2         | y |
| Panx2         | y |
| 1810021B22Rik | n |
| 1810021B22Rik | n |

|               |   |
|---------------|---|
| Panx2         | n |
| Panx2         | n |
| 1810021B22Rik | n |
| 1810021B22Rik | n |
| Panx2         | n |
| 1810021B22Rik | n |
| Hdac10        | y |
| Plxnb2        | y |
| Adm2          | y |
| Adm2          | y |
| Adm2          | y |
| Sbf1          | y |
| Sbf1          | y |
| Sbf1          | y |
| Adm2          | y |
| Sbf1          | y |
| Sbf1          | y |
| Sbf1          | y |
| Ncaph2        | y |
| Tymp          | y |
| Tymp          | y |
| Syce3         | n |
| Mapk8ip2      | y |
| Arsa          | n |
| Arsa          | n |
| Acr           | n |
| Acr           | n |
| Pphln1        | n |
| D630010B17Rik | n |
| Tmem117       | n |
| Tmem117       | n |
| Tmem117       | n |
| Dbx2          | y |
| Dbx2          | y |

|               |   |
|---------------|---|
| Ano6          | n |
| 2610037D02Rik | n |
| Gm4371        | n |
| 2610037D02Rik | n |
| Arid2         | n |
| Slc38a2       | n |
| Slc38a2       | y |
| Slc38a4       | n |
| Amigo2        | n |
| Amigo2        | n |
| Pced1b        | n |
| Pced1b        | n |
| Amigo2        | n |
| Amigo2        | n |
| Amigo2        | n |
| Pced1b        | n |
| Pced1b        | n |
| Amigo2        | n |
| Pced1b        | n |
| Pced1b        | n |
| Amigo2        | n |
| Amigo2        | n |
| Slc48a1       | n |
| Slc48a1       | n |
| Rapgef3       | n |
| Slc48a1       | y |
| Rapgef3       | y |
| Slc48a1       | n |
| Slc48a1       | y |
| Hdac7         | y |
| Hdac7         | y |
| Hdac7         | n |
| Slc48a1       | y |
| Hdac7         | n |
| Hdac7         | n |
| Hdac7         | n |
| Hdac7         | y |
| Tmem106c      | n |
| Tmem106c      | n |
| Pfkm          | y |
| Cacnb3        | y |

|               |   |
|---------------|---|
| Cacnb3        | y |
| Ddx23         | y |
| Wnt1          | n |
| Wnt1          | n |
| Wnt10b        | y |
| Wnt10b        | y |
| Wnt1          | y |
| Wnt10b        | y |
| Wnt1          | n |
| Wnt1          | n |
| Wnt10b        | n |
| Ddn           | n |
| Ddn           | y |
| Wnt1          | y |
| Dhh           | n |
| Dhh           | n |
| 4930578M01Rik | n |
| Dhh           | y |
| 4930578M01Rik | n |
| Tuba1c        | n |
| Tuba1c        | n |
| C1ql4         | n |
| Prph          | y |
| C1ql4         | n |
| C1ql4         | n |
| Dnajc22       | n |
| Dnajc22       | n |
| Spats2        | y |
| Prpf40b       | n |
| Fmnl3         | y |
| Nckap5l       | n |
| Faim2         | n |

|               |   |
|---------------|---|
| Aqp2          | y |
| Racgap1       | y |
| Racgap1       | n |
| Cers5         | n |
| Smarcd1       | n |
| Cers5         | n |
| Cers5         | n |
| Larp4         | n |
| Lima1         | n |
| Lima1         | n |
| Tmprss12      | n |
| Slc11a2       | y |
| Dazap2        | n |
| Dazap2        | n |
| Cela1         | n |
| Galnt6        | y |
| Slc4a8        | y |
| Figl2         | n |
| Figl2         | n |
| Scn8a         | n |
| Figl2         | n |
| Scn8a         | n |
| Scn8a         | n |
| Scn8a         | n |
| Figl2         | n |
| Figl2         | n |
| Figl2         | n |
| Acvrl1        | n |
| Acvrl1        | n |
| Acvrl1        | n |
| A330009N23Rik | n |
| Acvr1b        | n |
| A330009N23Rik | y |
| 6030408B16Rik | n |
| 6030408B16Rik | n |
| Krt80         | n |
| Krt80         | n |
| Krt80         | n |

|        |   |
|--------|---|
| Krt80  | n |
| Krt85  | n |
| Krt74  | n |
| Krt18  | n |
| Krt18  | n |
| Krt18  | y |
| Krt8   | y |
| Krt8   | y |
| Krt8   | y |
| Krt18  | y |
| Spryd3 | n |
| Spryd3 | n |
| Spryd3 | n |
| Tenc1  | n |
| Tenc1  | n |
| Spryd3 | n |
| Spryd3 | n |
| Tenc1  | n |
| Tenc1  | n |
| Igfbp6 | y |
| Spryd3 | y |
| Igfbp6 | y |
| Spryd3 | y |
| Spryd3 | y |
| Igfbp6 | y |
| Spryd3 | y |
| Igfbp6 | y |
| Soat2  | n |
| Rarg   | n |
| Rarg   | y |
| Rarg   | y |
| Mfsd5  | y |
| Rarg   | y |
| Sp7    | n |
| Myg1   | y |

|         |   |
|---------|---|
| Myg1    | y |
| Myg1    | n |
| Sp7     | n |
| Sp7     | n |
| Sp7     | n |
| Map3k12 | n |
| Tarbp2  | n |
| Tarbp2  | n |
| Tarbp2  | n |
| Hotair  | y |
| Hotair  | y |
| Hoxc4   | y |
| Hoxc4   | n |
| Hoxc4   | n |
| Smug1   | n |
| Hnrnpa1 | n |
| Hnrnpa1 | n |
| Copz1   | y |
| Gpr84   | y |
| Gpr84   | y |
| Gpr84   | y |
| Copz1   | y |
| Zfp385a | n |
| Copz1   | n |
| Zfp385a | n |
| Copz1   | n |
| Zfp385a | n |
| Copz1   | n |
| Zfp385a | n |
| Copz1   | n |
| Copz1   | y |
| Pde1b   | n |

|               |   |
|---------------|---|
| Pde1b         | n |
| Zfp263        | n |
| Zfp263        | n |
| Glis2         | y |
| Glis2         | y |
| Adcy9         | y |
| Glis2         | y |
| Pam16         | y |
| Glis2         | n |
| Pam16         | n |
| Dnaja3        | n |
| Hmox2         | y |
| Ubn1          | n |
| 1810013L24Rik | y |
| 1810013L24Rik | n |
| Emp2          | n |
| Tnp2          | y |
| Rmi2          | y |
| Prm1          | n |
| Prm1          | n |
| Rmi2          | n |
| Gm4262        | n |
| Gm4262        | n |
| Litaf         | n |
| Snx29         | n |
| Mir1945       | n |
| Snx29         | n |
| Snx29         | n |
| Cpped1        | n |
| Cpped1        | n |
| Mir193b       | n |
| Mir193b       | n |
| Mir193b       | n |
| Mir6365       | n |



|         |   |
|---------|---|
| Mir193b | n |
| Pdxdc1  | n |
| Pdxdc1  | n |
| Pdxdc1  | n |
| Ntan1   | n |
| Ppm1f   | n |
| Ppil2   | n |
| Ydjc    | y |
| Ydjc    | y |
| Ccdc116 | y |
| Ydjc    | y |
| Ccdc116 | y |
| Ydjc    | y |
| Ccdc116 | y |
| Ydjc    | y |
| Ydjc    | y |
| Ydjc    | y |
| Ube2l3  | y |
| Ube2l3  | y |
| Hic2    | y |
| Hic2    | y |
| Ube2l3  | y |
| Hic2    | n |
| Pi4ka   | n |
| Aifm3   | y |
| Thap7   | n |
| Lrrc74b | y |
| P2rx6   | y |
| P2rx6   | y |
| P2rx6   | y |
| Scarf2  | n |
| Tssk2   | y |
| Mir6366 | n |
| Rtn4r   | n |
| Mir6366 | n |
| Zdhhc8  | y |
| Arvcf   | y |
| Arvcf   | n |
| Arvcf   | n |
| Comt    | n |
| Gnb1l   | n |



|               |   |
|---------------|---|
| Clcn2         | n |
| Clcn2         | n |
| Teddm3        | n |
| Ephb3         | n |
| Gm16863       | n |
| Ephb3         | n |
| Gm16863       | n |
| Ephb3         | n |
| Ephb3         | n |
| Gm16863       | n |
| Gm16863       | n |
| Vps8          | n |
| Vps8          | n |
| Gm16863       | n |
| Vps8          | n |
| Vps8          | n |
| 2510009E07Rik | n |
| Tmem41a       | n |
| Senp2         | n |
| Etv5          | y |
| Dgkg          | n |
| Dgkg          | n |
| Dgkg          | n |
| Crygs         | n |
| Rfc4          | n |
| Lpp           | n |
| Lpp           | n |
| Lpp           | n |
| 1110054M08Rik | y |
| Lpp           | y |
| Lpp           | y |
| 1110054M08Rik | y |
| Lpp           | y |
| 1110054M08Rik | y |
| 1110054M08Rik | n |
| Atp13a4       | n |
| Opa1          | n |
| 4632428C04Rik | n |
| Gm1968        | n |
| 4632428C04Rik | n |
| 4632428C04Rik | n |

|               |   |
|---------------|---|
| Gm1968        | n |
| 4632428C04Rik | n |
| Gm1968        | n |
| 4632428C04Rik | n |
| 4632428C04Rik | n |
| 9030404E10Rik | n |
| 4632428C04Rik | n |
| 9030404E10Rik | n |
| 4632428C04Rik | n |
| 9030404E10Rik | n |
| 9030404E10Rik | n |
| 9030404E10Rik | n |
| Hes1          | n |
| 9030404E10Rik | n |
| 9030404E10Rik | n |
| 9030404E10Rik | n |
| Hes1          | n |
| Hes1          | n |
| 9030404E10Rik | n |
| Hes1          | n |
| 9030404E10Rik | n |
| Hes1          | n |
| 9030404E10Rik | n |
| Hes1          | n |
| 9030404E10Rik | n |

|               |   |
|---------------|---|
| 9030404E10Rik | n |
| 9030404E10Rik | n |
| Hes1          | n |
| 9030404E10Rik | n |
| 9030404E10Rik | n |
| Hes1          | n |
| 9030404E10Rik | n |
| 9030404E10Rik | n |
| Hes1          | n |
| Hes1          | n |
| Cpn2          | n |
| Cpn2          | n |
| Hes1          | n |
| Cpn2          | n |
| Cpn2          | n |
| Cpn2          | n |
| Hes1          | n |
| Lrrc15        | n |
| Fam43a        | n |
| Fam43a        | n |
| Mir1195       | n |
| Mir1195       | n |
| Fam43a        | n |
| Bdh1          | n |
| Bdh1          | n |
| Apod          | n |
| Bdh1          | n |
| Bdh1          | n |
| Apod          | n |
| Dlg1          | n |
| Dlg1          | n |
| Apod          | n |
| Pigz          | n |
| 0610012G03Rik | n |
| Pigz          | n |
| Bex6          | n |

|          |   |
|----------|---|
| Nrros    | n |
| Muc4     | n |
| Lmln     | y |
| Lmln     | y |
| Iqcg     | y |
| Snx4     | n |
| Slc12a8  | n |
| Slc12a8  | n |
| Slc12a8  | n |
| Itgb5    | n |
| Itgb5    | n |
| Umps     | n |
| Ropn1    | n |
| Mylk     | n |
| Mylk     | n |
| Adcy5    | y |
| Sema5b   | n |
| Sema5b   | n |
| Pdia5    | n |
| Sema5b   | n |
| Sema5b   | n |
| Sema5b   | n |
| Hspbap1  | n |
| Hspbap1  | n |
| Hspbap1  | y |
| Slc15a2  | n |
| Slc15a2  | n |
| Ildr1    | n |
| Hgd      | n |
| Ndufb4   | n |
| Lrrc58   | n |
| Cox17    | n |
| Cd80     | y |
| Cd80     | y |
| Pla1a    | y |
| Timmdc1  | y |
| Tmem39a  | n |
| Arhgap31 | n |
| Tmem39a  | n |
| Gap43    | n |
| Tigit    | n |

|               |   |
|---------------|---|
| 2610015P09Rik | n |
| Naa50         | n |
| Naa50         | n |
| Atp6v1a       | n |
| Boc           | n |
| Cfap44        | n |
| Cfap44        | n |
| Cfap44        | n |
| BC027231      | n |
| Gtpbp8        | n |
| Gcsam         | n |
| Retnlb        | n |
| Retnlb        | n |
| Retnlb        | n |
| Gm4827        | n |
| Ccdc54        | n |
| Mir6363       | n |
| Cmss1         | n |
| Pros1         | n |
| Epha3         | n |
| Robo1         | n |
| 4930578N18Rik | n |
| Nrip1         | n |
| Ncam2         | n |
| Jam2          | n |
| Bach1         | n |
| Bach1         | n |
| Grik1         | n |
| Gm10789       | y |
| Tiam1         | y |
| Gm10789       | n |
| Tiam1         | n |
| Tiam1         | n |
| Tiam1         | y |
| Tiam1         | y |
| Sod1          | n |
| Scaf4         | n |
| Scaf4         | n |
| Scaf4         | n |
| Hunk          | n |
| Hunk          | n |

|               |   |
|---------------|---|
| Mis18a        | n |
| Mis18a        | n |
| Mrap          | n |
| Mrap          | n |
| Mrap          | n |
| 1110004E09Rik | n |
| 4930404I05Rik | y |
| Olig2         | n |
| 4932438H23Rik | n |
| 4932438H23Rik | n |
| Olig1         | y |
| Olig1         | n |
| Olig1         | n |
| 4932438H23Rik | n |
| Olig1         | n |
| Olig1         | n |
| 4932438H23Rik | n |
| Olig1         | n |
| Olig1         | n |
| 4932438H23Rik | n |
| Olig1         | n |
| Olig1         | n |
| 4932438H23Rik | n |
| Olig1         | n |
| 4932438H23Rik | n |
| Tmem50b       | n |
| Atp5o         | n |
| Slc5a3        | n |
| Mrps6         | n |
| Smim11        | y |
| 2410124H12Rik | n |
| 2410124H12Rik | n |
| Rcan1         | n |
| Rcan1         | n |
| 2410124H12Rik | n |
| 2410124H12Rik | n |
| Rcan1         | n |
| Clic6         | y |
| Runx1         | y |
| Clic6         | y |
| Runx1         | y |



|               |   |
|---------------|---|
| Clic6         | y |
| Runx1         | y |
| Runx1         | y |
| Clic6         | y |
| Runx1         | y |
| Clic6         | y |
| Runx1         | y |
| Runx1         | y |
| Clic6         | y |
| Runx1         | y |
| Runx1         | y |
| Runx1         | y |
| Clic6         | n |
| Runx1         | n |
| Mir802        | n |
| Mir802        | n |
| Runx1         | n |
| Mir802        | n |
| Runx1         | n |
| 1700029J03Rik | n |
| Cbr1          | n |
| Cbr1          | n |
| Cldn14        | n |
| Cldn14        | n |
| Kcnj6         | n |
| Erg           | y |
| Kcnj15        | n |
| Erg           | n |
| Ets2          | n |
| Ets2          | n |

|               |   |
|---------------|---|
| Erg           | n |
| Ets2          | n |
| Wrb           | n |
| Sh3bgr        | y |
| Mx2           | y |
| Scaf8         | n |
| Scaf8         | n |
| Tiam2         | n |
| Tfb1m         | n |
| 4930548J01Rik | n |
| Arid1b        | n |
| Tmem242       | n |
| Tmem242       | n |
| Sytl3         | n |
| Rnaset2b      | n |
| Mir692-1      | n |
| Rnaset2b      | n |
| Rnaset2b      | n |
| Mir692-1      | n |
| Mir692-1      | n |
| Mir692-1      | n |
| Ttll2         | n |
| Fndc1         | n |
| Tagap         | n |
| Fndc1         | n |
| Fndc1         | n |
| Tagap         | n |
| T2            | n |
| T2            | n |
| T2            | n |
| Gm16702       | n |
| Gm16702       | n |
| Gm16702       | y |
| B930003M22Rik | n |
| A230009B12Rik | n |
| Park2         | n |
| Pacrg         | n |

|               |   |
|---------------|---|
| D17Ertd648e   | n |
| Park2         | n |
| D17Ertd648e   | n |
| D17Ertd648e   | n |
| Map3k4        | n |
| Slc22a3       | y |
| C030013G03Rik | y |
| C030013G03Rik | y |
| Slc22a3       | y |
| C030013G03Rik | y |
| Slc22a3       | y |
| C030013G03Rik | y |
| Slc22a3       | y |
| Airn          | n |
| Tcp10c        | n |
| Smok4a        | n |
| Mllt4         | n |
| Mllt4         | n |
| Ermard        | n |
| Ermard        | n |
| Dll1          | n |
| Mir125a       | y |
| Spaca6        | n |
| 6330415G19Rik | n |
| 6330415G19Rik | n |
| Zfp213        | n |
| Kremen2       | n |
| 9530082P21Rik | y |
| Kremen2       | y |
| 9530082P21Rik | y |
| 9530082P21Rik | y |
| Prss27        | n |
| Ntn3          | y |
| Abca3         | y |
| Rab26         | n |
| Pkd1          | n |
| Rab26         | n |
| Pkd1          | n |



|         |   |
|---------|---|
| Dusp1   | n |
| Neurl1b | n |
| Dusp1   | n |
| Neurl1b | n |
| Dusp1   | n |
| Neurl1b | n |
| Dusp1   | n |
| Neurl1b | n |
| Dusp1   | n |
| Neurl1b | n |
| Dusp1   | n |
| Neurl1b | n |
| Dusp1   | n |
| Neurl1b | n |
| Dusp1   | n |
| Neurl1b | n |
| Dusp1   | n |
| Neurl1b | n |
| Dusp1   | n |
| Ergic1  | n |
| Cuta    | y |
| Mir3083 | n |
| Mir3083 | n |
| Syngap1 | n |
| Syngap1 | n |

|         |   |
|---------|---|
| Syngap1 | n |
| Mir3083 | n |
| Syngap1 | n |
| Mir3083 | n |
| Syngap1 | n |
| Mir3083 | n |
| Syngap1 | n |
| Mir3083 | n |
| Bak1    | n |
| Ggnbp1  | n |
| Bak1    | n |
| Itpr3   | n |
| Itpr3   | n |
| Bak1    | n |
| Bak1    | y |
| Uqcc2   | n |
| Uqcc2   | n |
| Itpr3   | y |
| Ip6k3   | n |
| Itpr3   | n |
| Lemd2   | n |
| Lemd2   | n |
| Lemd2   | n |
| Mir7216 | n |
| Lemd2   | n |
| Lemd2   | n |
| Mir7218 | n |
| Grm4    | y |
| Hmga1   | y |
| Grm4    | y |
| Hmga1   | y |

|         |   |
|---------|---|
| Hmga1   | y |
| Grm4    | y |
| Grm4    | y |
| Grm4    | y |
| Hmga1   | y |
| Hmga1   | n |
| Pacsin1 | y |
| Pacsin1 | n |
| Tcp11   | n |
| Tcp11   | n |
| Anks1   | n |
| Tcp11   | n |
| Anks1   | n |
| Tcp11   | n |
| Anks1   | n |
| Tcp11   | n |
| Anks1   | n |
| Tcp11   | n |
| Anks1   | n |
| Tcp11   | n |
| Anks1   | n |
| Tcp11   | n |
| Anks1   | n |
| Tcp11   | n |
| Scube3  | n |
| Scube3  | y |
| Scube3  | n |
| Mir5098 | n |
| Mir5098 | n |
| Zfp523  | n |
| Zfp523  | n |
| Zfp523  | n |
| Mir5098 | n |
| Def6    | n |
| Mir5098 | n |
| Mir5098 | n |
| Mir5098 | n |

|               |   |
|---------------|---|
| Rpl10a        | y |
| Tead3         | y |
| Rpl10a        | y |
| Rpl10a        | n |
| Tead3         | n |
| Tead3         | n |
| Tead3         | n |
| Rpl10a        | n |
| Rpl10a        | n |
| Tead3         | n |
| Tead3         | n |
| Rpl10a        | y |
| Tead3         | y |
| Tulp1         | y |
| Rpl10a        | n |
| Tulp1         | n |
| Rpl10a        | y |
| Armc12        | n |
| Armc12        | n |
| Fkbp5         | n |
| Armc12        | n |
| Armc12        | n |
| Clps          | y |
| Clps          | y |
| Clps          | y |
| Armc12        | y |
| Pnpla1        | n |
| Pnpla1        | n |
| 4930539E08Rik | n |
| 4930539E08Rik | n |
| 4930539E08Rik | n |
| Kctd20        | y |
| Srsf3         | n |
| Rab44         | n |



|          |   |
|----------|---|
| Rab44    | n |
| Rab44    | n |
| Rab44    | n |
| Cpne5    | n |
| Pi16     | n |
| Mtch1    | n |
| Pi16     | n |
| Pi16     | n |
| Mtch1    | n |
| Mtch1    | n |
| Pi16     | n |
| Pi16     | n |
| Pi16     | n |
| Mtch1    | n |
| Pi16     | n |
| Mtch1    | n |
| Mtch1    | n |
| Fgd2     | n |
| Mtch1    | n |
| Fgd2     | n |
| Mtch1    | n |
| Mtch1    | n |
| Mtch1    | n |
| Pim1     | n |
| Pim1     | n |
| Tmem217  | n |
| Tmem217  | n |
| Tmem217  | n |
| Pim1     | n |
| Tmem217  | n |
| Pim1     | n |
| Tmem217  | n |
| Tmem217  | n |
| Tmem217  | n |
| Pim1     | n |
| Pim1     | n |
| Tmem217  | n |
| Tbc1d22b | n |

|               |   |
|---------------|---|
| Tbc1d22bos    | n |
| Tbc1d22b      | n |
| Cmtr1         | n |
| Cmtr1         | n |
| Cmtr1         | n |
| Ccdc167       | n |
| Cmtr1         | n |
| Ccdc167       | n |
| Ccdc167       | n |
| Cmtr1         | n |
| Ccdc167       | n |
| Mdga1         | n |
| Mdga1         | n |
| Zfand3        | n |
| Zfand3        | n |
| Mdga1         | n |
| Mdga1         | n |
| Mdga1         | n |
| Zfand3        | n |
| Zfand3        | n |
| Btbd9         | n |
| Zfand3        | n |
| Zfand3        | n |
| Btbd9         | n |
| Btbd9         | n |
| 1700097N02Rik | n |
| Tff3          | n |
| Tff3          | n |
| Slc37a1       | y |
| Slc37a1       | n |
| Pde9a         | n |
| Pde9a         | n |
| Rsph1         | n |
| Pde9a         | n |
| Pknox1        | n |
| U2af1         | n |
| Cryaa         | n |
| Cryaa         | y |

|         |   |
|---------|---|
| Cryaa   | y |
| Rrp1b   | n |
| Gm4432  | y |
| Gm4432  | y |
| Notch3  | y |
| Notch3  | y |
| Rasal3  | n |
| Cyp4f39 | n |
| Pglyrp2 | n |
| Cyp4f17 | y |
| Zfp871  | n |
| Zfp472  | n |
| Col11a2 | n |
| Col11a2 | n |
| H2-Oa   | n |
| H2-DMa  | n |
| H2-DMa  | n |
| Brd2    | n |
| H2-DMa  | n |
| Brd2    | n |
| H2-DMa  | n |
| H2-DMa  | n |
| H2-DMa  | n |
| Brd2    | n |
| H2-DMa  | n |
| H2-DMa  | n |
| H2-DMa  | n |
| Brd2    | n |
| H2-DMa  | n |
| Brd2    | n |
| Brd2    | n |
| H2-DMb2 | y |
| Tap1    | y |
| Tap1    | y |
| Notch4  | y |

|          |   |
|----------|---|
| Notch4   | y |
| Notch4   | y |
| Rnf5     | n |
| Rnf5     | y |
| Agpat1   | n |
| Ppt2     | y |
| Prrt1    | y |
| Prrt1    | y |
| Ppt2     | y |
| Prrt1    | y |
| Ppt2     | n |
| Atf6b    | n |
| Atf6b    | n |
| Atf6b    | n |
| C4b      | n |
| C2       | y |
| C2       | y |
| Zbtb12   | y |
| Slc44a4  | y |
| C2       | y |
| Vwa7     | y |
| G6b      | y |
| Atp6v1g2 | n |
| Atp6v1g2 | n |
| Atp6v1g2 | n |
| H2-D1    | n |
| Tcf19    | y |

|               |   |
|---------------|---|
| Sfta2         | n |
| Ddr1          | y |
| Sfta2         | y |
| Ddr1          | y |
| Sfta2         | y |
| Ddr1          | n |
| ler3          | n |
| ler3          | n |
| 2410017117Rik | n |
| Gm6623        | n |
| Gm6623        | n |
| H2-T3         | n |
| H2-T3         | n |
| Gm6623        | n |
| Rpp21         | n |
| Gm6623        | n |
| Rpp21         | n |
| Rpp21         | n |
| Gm6623        | n |
| Gm6623        | n |
| Zfp57         | y |
| H2-M5         | y |
| H2-M5         | y |
| Zfp57         | y |
| Zfp57         | y |
| Rn45s         | n |
| Pgk2          | n |
| Rn45s         | n |

|               |   |
|---------------|---|
| Rn45s         | n |
| Pgk2          | n |
| Mut           | n |
| Glyat13       | n |
| Mut           | n |
| Glyat13       | n |
| Glyat13       | n |
| E130008D07Rik | n |
| Tnfrsf21      | n |
| E130008D07Rik | n |
| Tnfrsf21      | n |
| E130008D07Rik | n |
| Tnfrsf21      | n |
| E130008D07Rik | n |
| E130008D07Rik | n |
| Gpr110        | n |
| Gpr110        | n |
| Gpr110        | n |
| Mep1a         | n |
| Gpr116        | n |
| Pla2g7        | n |
| Pla2g7        | n |
| Enpp5         | n |
| Runx2         | n |
| Runx2         | n |
| Supt3         | n |
| Supt3         | n |
| Supt3         | n |
| Cdc5l         | n |
| Aars2         | n |
| Aars2         | n |
| Slc29a1       | n |
| Slc29a1       | n |
| Slc29a1       | n |
| Slc35b2       | y |
| Gm7325        | y |
| Slc35b2       | y |
| Slc35b2       | y |

|               |   |
|---------------|---|
| Gm7325        | y |
| Slc35b2       | y |
| Slc35b2       | y |
| Gm7325        | y |
| Gm7325        | y |
| Mrpl14        | n |
| Tmem63b       | y |
| Tmem63b       | y |
| Mrpl14        | y |
| Tmem63b       | y |
| Mrpl14        | n |
| Mrpl14        | n |
| Mrpl14        | n |
| Tmem63b       | n |
| Mrpl14        | y |
| Mrpl14        | y |
| 1600014C23Rik | y |
| Mrpl14        | n |
| 1600014C23Rik | n |
| 1600014C23Rik | n |
| Mrpl14        | n |
| 1600014C23Rik | n |
| Mrpl14        | n |
| 1600014C23Rik | n |
| Mrpl14        | n |
| 1600014C23Rik | n |
| Vegfa         | n |
| Mrpl14        | n |
| Mrpl14        | n |
| Mrpl14        | n |
| Vegfa         | n |
| Mrps18a       | n |
| Mrps18a       | n |
| Vegfa         | n |
| Vegfa         | n |
| Rsph9         | n |
| Slc22a7       | y |

|          |   |
|----------|---|
| Slc22a7  | y |
| Crip3    | n |
| Crip3    | n |
| Dnph1    | y |
| Dnph1    | n |
| Cul9     | n |
| Cul9     | n |
| Dnph1    | n |
| Cul9     | n |
| Dnph1    | n |
| Ptk7     | n |
| Ptk7     | n |
| Mrpl2    | n |
| Mrpl2    | n |
| Ptk7     | n |
| Mrpl2    | n |
| Ptk7     | n |
| Mrpl2    | n |
| Mrpl2    | n |
| Ptk7     | n |
| Mrpl2    | y |
| Ptk7     | y |
| Ptk7     | y |
| Cul7     | y |
| Pex6     | y |
| Gnmt     | y |
| Gnmt     | y |
| Pex6     | y |
| Gnmt     | y |
| Gnmt     | y |
| Gnmt     | y |
| Pex6     | y |
| Pex6     | y |
| Gnmt     | y |
| Ubr2     | n |
| Ubr2     | n |
| Taf8     | n |
| Taf8     | n |
| Taf8     | n |
| AI661453 | n |
| AI661453 | n |



|          |   |
|----------|---|
| Al661453 | n |
| Taf8     | n |
| Taf8     | n |
| Taf8     | n |
| Al661453 | n |
| Al661453 | n |
| Al661453 | n |
| Taf8     | n |
| Al661453 | n |
| Taf8     | n |
| Al661453 | n |
| Taf8     | n |
| Al661453 | n |
| Taf8     | n |
| Al661453 | n |
| Al661453 | n |
| Taf8     | n |
| Al661453 | n |
| Taf8     | n |
| Al661453 | n |
| Taf8     | n |
| Al661453 | n |
| Taf8     | n |
| Al661453 | n |
| Taf8     | n |
| Taf8     | n |
| Al661453 | n |
| Usp49    | n |
| Usp49    | n |
| Frs3os   | n |
| Frs3os   | n |
| Frs3     | n |
| Frs3os   | n |

|               |   |
|---------------|---|
| Tfeb          | n |
| Foxp4         | n |
| Foxp4         | n |
| Tfeb          | n |
| Foxp4         | n |
| Foxp4         | n |
| Foxp4         | n |
| 1700067P10Rik | n |
| Foxp4         | n |
| Foxp4         | n |
| 1700122O11Rik | n |
| A730006G06Rik | n |
| Unc5cl        | n |
| Unc5cl        | n |
| 1700008K24Rik | n |
| Kif6          | n |
| Rftn1         | n |
| Btg3          | n |
| Ebi3          | n |
| Gm16712       | n |
| Sh3gl1        | n |
| Hdgfrp2       | y |
| Tnfaip8l1     | n |
| Sema6b        | n |
| Sema6b        | n |
| Tnfaip8l1     | n |
| Sema6b        | n |
| Tnfaip8l1     | n |
| Sema6b        | n |
| Tnfaip8l1     | n |
| Sema6b        | n |
| Tnfaip8l1     | n |
| Sema6b        | n |
| Sema6b        | n |
| D17Wsu104e    | y |
| Arrdc5        | y |
| Kdm4b         | n |
| Kdm4b         | n |



|               |   |
|---------------|---|
| Tnfsf9        | y |
| Tubb4a        | y |
| Tnfsf9        | y |
| Tnfsf9        | y |
| C3            | n |
| Fbxl17        | n |
| Fbxl17        | n |
| Pja2          | n |
| Dreh          | n |
| Tmem232       | n |
| Ptprm         | n |
| Ptprm         | n |
| Arhgap28      | n |
| Epb4.1l3      | y |
| 2410021H03Rik | y |
| Zbtb14        | y |
| Tgif1         | n |
| Dlgap1        | n |
| Tgif1         | n |
| Dlgap1        | n |
| Emilin2       | n |
| Myom1         | n |
| Myom1         | n |
| Myom1         | n |
| Emilin2       | y |
| Ehd3          | n |
| Galnt14       | n |
| Xdh           | y |
| Ehd3          | y |
| Memo1         | n |
| Ltbp1         | n |
| Fam98a        | y |
| Vit           | n |
| Morn2         | n |
| Tmem178       | n |

|         |   |
|---------|---|
| Pkdcc   | n |
| Gm19689 | n |
| Pkdcc   | n |
| Gm19689 | n |
| Pkdcc   | n |
| Pkdcc   | y |
| Gm19689 | y |
| Gm19689 | n |
| Eml4    | n |
| Eml4    | n |
| Cox7a2l | n |
| Eml4    | n |
| Cox7a2l | n |
| Eml4    | n |
| Eml4    | n |
| Cox7a2l | n |
| Eml4    | n |
| Cox7a2l | n |
| Cox7a2l | n |
| Eml4    | n |
| Eml4    | n |
| Cox7a2l | n |
| Eml4    | n |
| Cox7a2l | n |
| Cox7a2l | n |
| Cox7a2l | n |
| Eml4    | n |
| Eml4    | n |
| Cox7a2l | n |
| Mta3    | y |
| Kcng3   | y |
| Hao     | n |
| Hao     | y |
| Mta3    | n |
| Hao     | n |
| Mta3    | n |
| Hao     | n |
| Mta3    | n |

|               |   |
|---------------|---|
| Mta3          | n |
| Mta3          | n |
| Mta3          | n |
| Hao           | n |
| Hao           | n |
| 4933433H22Rik | n |
| Hao           | n |
| Zfp36l2       | n |
| Zfp36l2       | n |
| Zfp36l2       | n |
| Slc3a1        | n |
| Six3          | y |
| Six3os1       | n |
| Six3          | n |
| Six2          | n |
| Six2          | n |
| Six2          | n |
| Six3          | n |
| Six2          | n |
| Six2          | n |
| Six3          | n |
| Six2          | n |
| Prkce         | n |
| 2010106C02Rik | n |
| 2010106C02Rik | n |
| Prkce         | n |
| Prkce         | n |
| 2010106C02Rik | n |
| Prkce         | n |
| Prkce         | n |
| 2010106C02Rik | n |
| Epas1         | n |
| Atp6v1e2      | n |
| Epas1         | n |
| Atp6v1e2      | n |
| Epas1         | n |
| Epas1         | n |
| Epas1         | n |

|               |   |
|---------------|---|
| Epas1         | n |
| Epas1         | n |
| Atp6v1e2      | n |
| Socs5         | n |
| Socs5         | n |
| C330024C12Rik | n |
| 4833418N02Rik | n |
| 4833418N02Rik | n |
| 4833418N02Rik | n |
| 1700011E24Rik | n |
| 1700011E24Rik | n |
| Calm2         | n |
| Epcam         | n |
| Calm2         | n |
| Epcam         | n |
| Kcnk12        | n |
| Kcnk12        | n |
| Epcam         | n |
| Epcam         | y |
| Epcam         | y |
| Epcam         | y |
| Msh2          | n |
| Msh2          | n |
| Kcnk12        | n |
| Msh2          | n |
| Kcnk12        | n |
| Msh2          | n |
| Kcnk12        | n |

|               |   |
|---------------|---|
| Msh6          | n |
| Kcnk12        | n |
| Ston1         | y |
| Lhcgr         | y |
| Gtf2a1l       | n |
| 4930480K15Rik | n |
| Nrxn1         | n |
| 4930480K15Rik | n |
| 4930480K15Rik | n |
| Nrxn1         | n |
| Nrxn1         | n |
| Nrxn1         | n |
| Map3k8        | n |
| Zfp438        | n |
| Zeb1          | n |
| Zeb1          | n |
| Zeb1          | n |
| Gm10125       | n |
| Gjd4          | y |
| Fzd8          | y |
| Fzd8          | y |
| Gjd4          | y |
| Fzd8          | y |
| Gjd4          | n |
| Fzd8          | n |
| Gjd4          | n |
| Gjd4          | n |
| Fzd8          | n |
| Gjd4          | n |
| Fzd8          | n |
| Gjd4          | n |
| Fzd8          | n |
| Gjd4          | n |
| Fzd8          | n |
| Gjd4          | n |
| Usp14         | y |
| Mir1a-2       | n |
| 1010001N08Rik | n |
| 1010001N08Rik | n |



|               |   |
|---------------|---|
| 1010001N08Rik | n |
| Gata6         | n |
| 1010001N08Rik | n |
| 1010001N08Rik | n |
| Cables1       | n |
| Cables1       | n |
| Tmem241       | n |
| Tmem241       | n |
| Tmem241       | n |
| Osbp1a        | n |
| Osbp1a        | n |
| Osbp1a        | n |
| Hrh4          | n |
| Hrh4          | n |
| Osbp1a        | n |
| Hrh4          | n |
| Hrh4          | n |
| Osbp1a        | n |
| Psm8          | n |
| Psm8          | n |
| Psm8          | y |
| Ss18          | y |
| Psm8          | y |
| Ss18          | y |
| Psm8          | y |
| Ss18          | y |
| Ss18          | y |
| Ss18          | y |
| Taf4b         | y |
| Kctd1         | n |
| Kctd1         | n |
| Ttr           | y |
| B4galt6       | y |
| Trappc8       | y |
| Rnf125        | y |
| Trappc8       | y |
| 4930426D05Rik | y |
| 4930426D05Rik | y |

|               |   |
|---------------|---|
| Klhl14        | y |
| 4930426D05Rik | n |
| Slc39a6       | y |
| Mocos         | n |
| Pik3c3        | n |
| Gypc          | n |
| Nme5          | n |
| Wnt8a         | n |
| Nme5          | n |
| Wnt8a         | n |
| Wnt8a         | n |
| Nme5          | n |
| Wnt8a         | n |
| Nme5          | n |
| Wnt8a         | n |
| Nme5          | n |
| Wnt8a         | n |
| Egr1          | n |
| Ctnna1        | y |
| Cxxc5         | n |
| Tmem173       | n |
| Tmem173       | n |
| Psd2          | n |
| Nrg2          | n |
| lgip          | n |
| lgip          | n |
| lgip          | n |
| Hbegf         | y |
| Slc4a9        | y |

|               |   |
|---------------|---|
| E230025N22Rik | y |
| E230025N22Rik | y |
| Cd14          | n |
| Pcdha4-g      | y |
| Pcdhgb7       | y |
| Diap1         | n |
| Diap1         | n |
| Pcdhgb7       | n |
| Pcdhga11      | n |
| Pcdhga11      | n |
| Diap1         | n |
| Pcdhga11      | n |
| Diap1         | n |
| Pcdhga11      | n |
| Diap1         | n |
| Pcdhga11      | n |
| Diap1         | n |
| Pcdhga11      | n |
| Pcdhga11      | n |
| Rnf14         | y |
| Spry4         | n |
| Spry4         | n |
| Spry4         | n |
| Ndfip1        | n |
| Ndfip1        | n |
| Ndfip1        | n |
| Spry4         | n |
| Ndfip1        | n |
| Spry4         | n |
| Ndfip1        | n |
| Spry4         | n |
| Ndfip1        | n |
| Ndfip1        | n |
| Spry4         | n |
| Ndfip1        | n |
| Spry4         | n |
| Ndfip1        | n |
| Spry4         | n |

|               |   |
|---------------|---|
| Ndfip1        | n |
| Ndfip1        | n |
| Spry4         | n |
| Spry4         | y |
| Spry4         | y |
| Gm5820        | n |
| Gm5820        | n |
| Fgf1          | n |
| Arhgap26      | n |
| Lars          | n |
| Ppp2r2b       | n |
| Gm94          | n |
| Ythdc2        | n |
| Eif1a         | y |
| Trim36        | y |
| Trim36        | y |
| Ticam2        | y |
| 9130209A04Rik | n |
| 9130209A04Rik | n |
| 9130209A04Rik | n |
| Sema6a        | n |
| Gm5095        | n |
| Sema6a        | n |
| Gm5095        | n |
| 1700044K03Rik | n |
| 1700044K03Rik | n |
| Dtwd2         | n |
| Dtwd2         | n |
| Sncaip        | n |
| Sncaip        | n |
| Sncaip        | n |
| Snx24         | n |
| Ppic          | n |
| Ppic          | n |
| 9330117O12Rik | n |
| Zfp608        | n |
| 9330117O12Rik | n |
| Zfp608        | n |



|               |   |
|---------------|---|
| Slc6a7        | n |
| Slc6a7        | y |
| Pdgfrb        | y |
| Pdgfrb        | y |
| Cdx1          | y |
| Cdx1          | y |
| Pdgfrb        | y |
| Cdx1          | y |
| Pdgfrb        | y |
| Cdx1          | y |
| Pdgfrb        | y |
| Cdx1          | y |
| Pdgfrb        | y |
| Cdx1          | y |
| Cdx1          | y |
| Pdgfrb        | y |
| Cdx1          | y |
| Pdgfrb        | y |
| Cdx1          | y |
| Pdgfrb        | y |
| Pdgfrb        | y |
| Cdx1          | y |
| Cdx1          | y |
| Pdgfrb        | y |
| Cdx1          | n |
| Cdx1          | n |
| Cdx1          | y |
| Pdgfrb        | n |
| Cdx1          | n |
| Pdgfrb        | n |
| Pde6a         | n |
| A530050N04Rik | n |
| Gm20748       | n |
| 1500015A07Rik | n |
| Afap1l1       | n |
| 1500015A07Rik | n |
| Afap1l1       | n |

|         |   |
|---------|---|
| Sh3tc2  | n |
| Onecut2 | n |
| Onecut2 | n |
| Fech    | n |
| Onecut2 | n |
| Onecut2 | n |
| Atp8b1  | n |
| Nedd4l  | n |
| Atp8b1  | n |
| Nedd4l  | n |
| Atp8b1  | n |
| Nedd4l  | n |
| Atp8b1  | n |
| Atp8b1  | n |
| Nedd4l  | n |
| Mir466p | n |
| Oacyl   | n |
| Mir466p | n |
| Rax     | y |
| Ccbe1   | n |
| Pmaip1  | n |
| Pmaip1  | n |
| Pmaip1  | n |
| Ccbe1   | n |
| Gm9926  | n |
| Impa2   | n |
| Cidea   | n |
| Tubb6   | y |
| Afg3l2  | y |
| Ldlrad4 | n |
| Tcf4    | n |
| Tcf4    | n |
| Mir145b | n |
| Tcf4    | n |
| Tcf4    | n |
| Rab27b  | n |
| Tcf4    | n |

|               |   |
|---------------|---|
| Tcf4          | n |
| Tcf4          | n |
| Tcf4          | n |
| Rab27b        | n |
| 4930503L19Rik | y |
| Smad4         | n |
| Smad4         | y |
| Mro           | n |
| Elac1         | n |
| Mapk4         | n |
| D730045A05Rik | n |
| Rpl17         | n |
| 9030625G05Rik | n |
| 2010010A06Rik | n |
| Dym           | n |
| 2010010A06Rik | n |
| Dym           | n |
| Dym           | n |
| 2010010A06Rik | n |
| Dym           | n |
| 2010010A06Rik | n |
| Dym           | n |
| 2010010A06Rik | n |
| Dym           | n |
| 2010010A06Rik | n |
| 2010010A06Rik | n |
| Dym           | n |
| 2010010A06Rik | n |
| Dym           | n |
| Dym           | n |
| Smad7         | n |
| Smad7         | n |
| 2010010A06Rik | n |
| Smad7         | n |
| 2010010A06Rik | n |



|               |   |
|---------------|---|
| Smad7         | n |
| Smad7         | n |
| 2010010A06Rik | n |
| Smad7         | n |
| Smad7         | n |
| Ctif          | n |
| Ctif          | n |
| Smad7         | n |
| Ctif          | n |
| Smad7         | n |
| Smad7         | n |
| Ctif          | n |
| Ctif          | n |
| Ctif          | n |
| Gm10532       | n |
| Gm10532       | n |
| Ctif          | n |
| Zbtb7c        | n |
| 2900057B20Rik | n |
| Zbtb7c        | n |
| Zbtb7c        | n |
| 2900057B20Rik | n |
| 2900057B20Rik | n |
| Zbtb7c        | n |
| Zbtb7c        | n |
| Zbtb7c        | n |
| 2900057B20Rik | n |
| 2900057B20Rik | n |
| Katnal2       | n |
| St8sia5       | y |
| 4930465K10Rik | n |
| Rnf165        | n |
| 4930465K10Rik | n |
| 4930465K10Rik | n |
| Haus1         | y |
| Haus1         | y |
| Epg5          | n |
| Slc14a2       | n |
| Pard6g        | n |
| Adnp2         | n |
| Adnp2         | n |

|               |   |
|---------------|---|
| Nfatc1        | n |
| Nfatc1        | n |
| Pqlc1         | n |
| Nfatc1        | n |
| Nfatc1        | n |
| Pqlc1         | n |
| Pqlc1         | n |
| Pqlc1         | n |
| Sall3         | n |
| Sall3         | n |
| Mbp           | n |
| Mbp           | n |
| Mir5127       | n |
| Mbp           | n |
| Mbp           | n |
| Mbp           | y |
| Galr1         | y |
| Mbp           | y |
| Mbp           | y |
| Zfp236        | n |
| Zfp236        | n |
| Zfp236        | n |
| Mbp           | n |
| Mir5112       | n |
| Mir5112       | n |
| 2210420H20Rik | n |
| 4930445N18Rik | n |
| 2210420H20Rik | n |
| 4930445N18Rik | n |
| 4930445N18Rik | n |
| Zfp516        | y |
| Zfp516        | n |
| 4930592I03Rik | n |
| 4921531P14Rik | n |
| Zfp516        | n |
| Zadh2         | n |
| Zadh2         | y |
| Zadh2         | y |

|          |   |
|----------|---|
| Zadh2    | y |
| Tshz1    | y |
| Tshz1    | y |
| Zfp407   | n |
| Zadh2    | n |
| Fam69c   | n |
| Fam69c   | n |
| Fam69c   | n |
| Socs6    | n |
| Mrpl21   | n |
| Lrp5     | y |
| Lrp5     | y |
| Lrp5     | n |
| Chka     | y |
| Unc93b1  | n |
| Unc93b1  | n |
| Rps6kb2  | n |
| Ptprcap  | n |
| Carns1   | n |
| Ppp1ca   | y |
| Carns1   | y |
| Tbc1d10c | y |
| Clcf1    | n |
| Rad9a    | n |
| Rad9a    | n |
| Rad9a    | n |
| Ssh3     | n |
| Ssh3     | n |
| Ssh3     | n |
| Pold4    | n |
| Pold4    | n |
| Adrbk1   | n |
| Lrfn4    | n |
| Lrfn4    | n |
| Sptbn2   | y |
| Sptbn2   | y |
| Sptbn2   | n |
| Gm960    | n |
| Gm960    | n |
| Rbm4     | n |
| Rin1     | y |

|          |   |
|----------|---|
| Rin1     | y |
| Rin1     | n |
| Tmem151a | n |
| Tmem151a | n |
| Rin1     | n |
| Tmem151a | y |
| Cd248    | n |
| Tmem151a | n |
| Yif1a    | n |
| Yif1a    | n |
| Tmem151a | n |
| Yif1a    | n |
| Gal3st3  | y |
| Gal3st3  | y |
| Gal3st3  | y |
| Sf3b2    | y |
| Gal3st3  | y |
| Fibp     | n |
| Ctsw     | y |
| Rela     | n |
| Rela     | n |
| Fam89b   | y |
| Scyl1    | n |
| Ltbp3    | n |
| Ltbp3    | n |
| Scyl1    | n |
| Ltbp3    | n |
| Scyl1    | n |
| Scyl1    | n |
| Ltbp3    | n |
| Scyl1    | n |
| Ltbp3    | n |
| Scyl1    | n |
| Ltbp3    | n |



|          |   |
|----------|---|
| Ltbp3    | n |
| Scyl1    | n |
| Ltbp3    | n |
| Scyl1    | n |
| Ltbp3    | n |
| Scyl1    | n |
| Scyl1    | n |
| Ltbp3    | n |
| Scyl1    | n |
| Ltbp3    | n |
| Scyl1    | n |
| Ltbp3    | n |
| Malat1   | n |
| Slc25a45 | n |
| Cdc42ep2 | n |
| Cdc42ep2 | n |
| Gm10814  | n |
| Pola2    | n |
| Capn1    | y |
| Gm10814  | y |
| Syvn1    | y |
| Map4k2   | n |
| Ppp2r5b  | y |
| Pygm     | y |
| Pygm     | y |
| Ppp2r5b  | y |
| Slc22a12 | n |
| Rasgrp2  | n |
| Rasgrp2  | n |
| Slc22a12 | n |
| Slc22a12 | n |
| Slc22a12 | n |



|         |   |
|---------|---|
| Trmt112 | n |
| Rps6ka4 | n |
| Rps6ka4 | n |
| Ccdc88b | y |
| Trmt112 | y |
| Kcnk4   | y |
| Kcnk4   | y |
| Kcnk4   | y |
| Trmt112 | y |
| Kcnk4   | y |
| Macrod1 | n |
| Stip1   | n |
| Macrod1 | n |
| Macrod1 | n |
| Macrod1 | n |
| Flrt1   | n |
| Flrt1   | n |
| Macrod1 | n |
| Flrt1   | n |
| Macrod1 | n |
| Macrod1 | n |
| Macrod1 | n |
| Flrt1   | n |
| Flrt1   | n |
| Macrod1 | n |
| Macrod1 | n |
| Flrt1   | n |
| Macrod1 | n |



|               |   |
|---------------|---|
| Macro1        | n |
| Otub1         | n |
| Mark2         | y |
| Rtn3          | n |
| Rtn3          | n |
| 9830166K06Rik | n |
| Chrm1         | n |
| 9830166K06Rik | n |
| Ahnak         | y |
| Rom1          | y |
| Asrgl1        | n |
| Ahnak         | n |
| Fth1          | n |
| Fth1          | n |
| Fen1          | y |
| Fads1         | y |
| Myrf          | n |
| Myrf          | n |
| Tmem258       | n |
| Dagla         | n |
| Tmem258       | n |
| Syt7          | n |
| Lrrc10b       | n |
| Lrrc10b       | y |
| Ppp1r32       | n |
| Cd5           | n |
| Vps37c        | n |
| Cd5           | n |
| Cd5           | n |

|               |   |
|---------------|---|
| Slc15a3       | n |
| Slc15a3       | n |
| Slc15a3       | n |
| Ptgdr2        | n |
| A330040F15Rik | n |
| Tle4          | y |
| Psat1         | y |
| Mir496b       | y |
| Gna14         | y |
| Prune2        | n |
| Gcnt1         | n |
| Tmc1          | n |
| Gda           | n |
| Klf9          | n |
| Smc5          | n |
| Klf9          | n |
| Smc5          | n |
| Smc5          | n |
| Smc5          | n |
| Klf9          | n |
| Smc5          | n |
| Klf9          | n |
| Smc5          | n |
| Smc5          | n |
| 1700028P14Rik | n |
| Fam189a2      | n |
| Fxn           | n |
| Apba1         | n |
| Dock8         | n |
| Dock8         | n |
| Cbwd1         | n |
| 4931403E22Rik | n |
| Smarca2       | y |
| Gm815         | n |
| Vldlr         | n |

|               |   |
|---------------|---|
| D19Bwg1357e   | n |
| D19Bwg1357e   | n |
| Vldlr         | n |
| D19Bwg1357e   | n |
| Vldlr         | n |
| Vldlr         | n |
| D19Bwg1357e   | n |
| Ppapdc2       | n |
| A930007119Rik | n |
| Uhrf2         | y |
| Gldc          | y |
| Gldc          | y |
| Ppp1r2-ps3    | n |
| Ppp1r2-ps3    | n |
| Sgms1         | n |
| Sgms1         | n |
| 2700046G09Rik | n |
| Pten          | n |
| Pank1         | y |
| Exoc6         | n |
| Ide           | n |
| Ide           | n |
| Myof          | y |
| Cyp26c1       | y |
| Myof          | y |
| Cyp26c1       | y |
| Myof          | y |
| Cyp26c1       | y |
| Myof          | n |
| Myof          | n |
| Myof          | n |
| Cyp26c1       | n |
| Cyp26c1       | n |
| Cyp26c1       | n |
| Myof          | n |
| Myof          | n |
| Myof          | n |
| Cyp26c1       | n |
| Myof          | n |
| Cyp26c1       | n |
| Cyp26c1       | n |

|         |   |
|---------|---|
| Cyp26c1 | n |
| Myof    | n |
| Cyp26c1 | n |
| Myof    | n |
| Cyp26c1 | n |
| Myof    | n |
| Myof    | n |
| Cyp26a1 | y |
| Myof    | n |
| Myof    | n |
| Cyp26a1 | n |
| Cyp26a1 | n |
| Myof    | n |
| Myof    | n |
| Cyp26a1 | n |
| Myof    | n |
| Myof    | n |
| Myof    | n |
| Cep55   | n |
| Cep55   | n |
| Cep55   | n |
| Myof    | n |
| Cep55   | n |
| Cep55   | n |
| Cep55   | n |
| Myof    | n |
| Cep55   | n |
| Pdlim1  | n |
| Cyp2c50 | n |
| Pdlim1  | n |
| Cyp2c50 | n |
| Pdlim1  | n |
| Pdlim1  | n |
| Entpd1  | n |
| Entpd1  | n |
| Sorbs1  | n |
| Entpd1  | n |
| Sorbs1  | n |

|               |   |
|---------------|---|
| Aldh18a1      | n |
| Aldh18a1      | n |
| Aldh18a1      | n |
| Entpd1        | n |
| Tctn3         | n |
| Blk           | y |
| E030044B06Rik | n |
| Blk           | n |
| E030044B06Rik | n |
| Zfp518a       | n |
| Blk           | n |
| Zfp518a       | n |
| Blk           | n |
| Blk           | y |
| Lcor          | n |
| Pik3ap1       | n |
| Rrp12         | y |
| Morn4         | y |
| Morn4         | y |
| Pi4k2a        | y |
| Avpi1         | y |
| Sfrp5         | n |
| Pyroxd2       | n |
| R3hcc1l       | y |
| Pyroxd2       | y |
| Pyroxd2       | y |
| Cnm1          | n |
| Hpse2         | n |
| Hpse2         | n |
| Hpse2         | y |
| Cnm1          | n |
| Got1          | n |
| Cnm1          | n |
| Got1          | n |
| Got1          | n |
| Nkx2-3        | n |

|               |   |
|---------------|---|
| Got1          | n |
| Got1          | n |
| Slc25a28      | n |
| Slc25a28      | n |
| Nkx2-3        | n |
| Slc25a28      | n |
| Gm10768       | n |
| Dnmbp         | n |
| Dnmbp         | n |
| Gm10768       | n |
| Dnmbp         | n |
| Gm10768       | n |
| Gm10768       | n |
| Gm10768       | n |
| Scd2          | n |
| Scd2          | n |
| Pax2          | y |
| Pax2          | n |
| 1700039E22Rik | n |
| 4930414N06Rik | n |
| Fam178a       | y |
| Pdzd7         | n |
| Pdzd7         | n |
| Sfxn3         | y |
| Sfxn3         | y |
| Pdzd7         | y |
| Pdzd7         | n |
| Sfxn3         | n |
| Pdzd7         | n |
| Pdzd7         | n |
| Kazald1       | n |
| Kazald1       | n |
| Pdzd7         | n |
| Pdzd7         | n |
| Lbx1          | n |

|        |   |
|--------|---|
| Tlx1   | n |
| Lbx1   | n |
| Tlx1   | n |
| Lbx1   | n |
| Lbx1   | n |
| Btrc   | n |
| Lbx1   | n |
| Poll   | n |
| Dpcd   | n |
| Dpcd   | n |
| Dpcd   | y |
| Dpcd   | y |
| Fgf8   | y |
| Fgf8   | y |
| Fgf8   | y |
| Dpcd   | y |
| Fgf8   | y |
| Dpcd   | y |
| Fgf8   | y |
| Dpcd   | y |
| Kcnip2 | n |
| Hps6   | y |
| Hps6   | y |
| Hps6   | y |
| Hps6   | n |
| Hps6   | n |
| Nfkb2  | n |
| Sufu   | n |
| Sufu   | n |
| Sufu   | n |
| Arl3   | n |
| Trim8  | n |
| Arl3   | n |
| Trim8  | n |

|          |   |
|----------|---|
| Trim8    | n |
| Arl3     | n |
| Arl3     | n |
| Arl3     | n |
| Wbp1l    | n |
| Arl3     | n |
| Wbp1l    | n |
| Wbp1l    | y |
| Cyp17a1  | y |
| Cyp17a1  | y |
| Cyp17a1  | y |
| Wbp1l    | y |
| Cnm2     | n |
| Nt5c2    | n |
| Calhm1   | y |
| Neur1a   | n |
| Neur1a   | n |
| Sh3pxd2a | n |
| Neur1a   | n |
| Sh3pxd2a | n |
| Sh3pxd2a | n |
| Gm19557  | n |
| Gm19557  | n |
| Sh3pxd2a | n |
| Sh3pxd2a | n |
| Sh3pxd2a | n |
| Gm19557  | n |
| Sh3pxd2a | n |
| Sh3pxd2a | n |
| Sh3pxd2a | n |
| Cfap43   | n |
| Gsto1    | y |



|               |   |
|---------------|---|
| Gsto1         | y |
| Gsto1         | y |
| AA387883      | n |
| Xpnpep1       | n |
| Add3          | n |
| Add3          | n |
| 1700001K23Rik | n |
| Mxi1          | n |
| Mxi1          | n |
| 5830416P10Rik | n |
| Mxi1          | n |
| 5830416P10Rik | n |
| Mxi1          | n |
| 5830416P10Rik | n |
| Dusp5         | n |
| 5830416P10Rik | n |
| Bbip1         | n |
| Bbip1         | n |
| Adra2a        | n |
| Bbip1         | n |
| Tectb         | n |
| Acsl5         | n |
| Vti1a         | n |
| Zdhhc6        | n |
| Vti1a         | n |
| Tcf7l2        | n |
| 4930552P12Rik | n |
| 4930552P12Rik | n |
| 4930552P12Rik | n |
| Tcf7l2        | y |
| Tcf7l2        | y |
| 4930552P12Rik | y |
| Nrap          | n |

|               |   |
|---------------|---|
| Tcf7l2        | n |
| Habp2         | n |
| Habp2         | n |
| Nrap          | n |
| Adrb1         | n |
| Ccdc186       | n |
| Ablim1        | n |
| Ablim1        | n |
| Ablim1        | n |
| B230217O12Rik | n |
| Atrnl1        | n |
| Gfra1         | n |
| Gfra1         | n |
| Gfra1         | n |
| Gm10007       | n |
| Mir3086       | n |
| Mir3086       | n |
| Eno4          | n |
| 4930506M07Rik | n |
| Vax1          | n |
| Vax1          | y |
| Grk5          | n |
| Csf2ra        | n |
| Grk5          | n |
| Csf2ra        | n |
| Grk5          | n |
| Grk5          | n |
| Rpp38         | n |
| Frmd4a        | n |
| 1700080N15Rik | n |
| Prpf18        | n |
| Prpf18        | n |
| Phyh          | y |
| Optn          | y |
| Echdc3        | n |
| Echdc3        | n |
| Usp6nl        | n |
| Usp6nl        | n |

|               |   |
|---------------|---|
| Celf2         | n |
| Usp6nl        | n |
| Celf2         | n |
| Celf2         | y |
| Usp6nl        | y |
| Celf2         | n |
| Gata3         | n |
| 4930412O13Rik | n |
| 4930412O13Rik | n |
| 4930412O13Rik | n |
| 9230102O04Rik | n |
| 9230102O04Rik | n |
| 4930412O13Rik | n |
| 4930412O13Rik | n |
| 4930412O13Rik | n |
| 9230102O04Rik | n |
| 4930412O13Rik | n |
| 4930412O13Rik | n |
| 9230102O04Rik | n |
| Itih5         | n |
| Itih5         | n |
| Itih5         | n |
| E030013I19Rik | n |
| E030013I19Rik | n |
| Pter          | y |
| Pter          | y |
| Vim           | y |
| Nebl          | n |
| A930004D18Rik | n |
| Gm17762       | n |
| Gm17762       | n |
| Gm17762       | n |
| A930004D18Rik | n |
| Gm17762       | n |
| A930004D18Rik | n |
| Gm17762       | n |
| A930004D18Rik | n |
| Gm17762       | n |
| A930004D18Rik | n |
| A930004D18Rik | n |
| Gm17762       | n |

|               |   |
|---------------|---|
| A930004D18Rik | n |
| Gm17762       | n |
| A930004D18Rik | n |
| Gm17762       | n |
| A930004D18Rik | n |
| Gm17762       | n |
| A930004D18Rik | n |
| Gm17762       | n |
| A930004D18Rik | n |
| Gm17762       | n |
| A930004D18Rik | n |
| Gm17762       | n |
| A930004D18Rik | n |
| Gm17762       | n |
| A930004D18Rik | n |
| Gm17762       | n |
| A930004D18Rik | n |
| Gm17762       | n |
| A930004D18Rik | n |
| Gm17762       | n |
| A930004D18Rik | n |
| Gm17762       | n |
| A930004D18Rik | n |
| Gm17762       | n |
| A930004D18Rik | n |
| Gm17762       | n |
| A930004D18Rik | n |
| Gm17762       | n |
| A930004D18Rik | n |
| Gm17762       | n |
| A930004D18Rik | n |
| Gm17762       | n |
| A930004D18Rik | n |
| Gm17762       | n |
| Skida1        | n |
| Skida1        | n |
| Mllt10        | n |
| Mllt10        | n |

|               |   |
|---------------|---|
| 4930426L09Rik | n |
| Gm3230        | n |
| Arhgap21      | y |
| Pax8          | n |
| Psd4          | n |
| Psd4          | n |
| Pax8          | n |
| Psd4          | n |
| Pax8          | n |
| Pax8          | n |
| Zmynd19       | n |
| Noxa1         | y |
| Entpd8        | y |
| Noxa1         | y |
| Noxa1         | y |
| Noxa1         | y |
| Entpd8        | y |
| Noxa1         | y |
| Noxa1         | y |
| Tor4a         | n |
| Rnf208        | y |
| Ndor1         | y |
| Rnf208        | y |
| Ndor1         | y |
| Uap111        | y |
| Edf1          | n |
| Traf2         | n |
| Traf2         | n |
| Edf1          | n |
| Gm996         | n |
| Gm996         | n |
| Kcnt1         | n |
| Kcnt1         | n |
| Gpsm1         | y |
| Gpsm1         | y |
| Gpsm1         | y |
| Gpsm1         | n |
| 4932418E24Rik | y |
| Notch1        | n |
| Egfl7         | n |
| Egfl7         | n |

|          |   |
|----------|---|
| Egfl7    | n |
| Mir126b  | n |
| Mir126b  | n |
| Egfl7    | y |
| Egfl7    | y |
| Mir126b  | y |
| Mir126b  | y |
| Fam69b   | n |
| Adamtsl2 | n |
| Sardh    | n |
| Dbh      | n |
| Dbh      | n |
| Vav2     | n |
| Wdr5     | y |
| Vav2     | y |
| Wdr5     | y |
| Wdr5     | n |
| Brd3     | n |
| Rxra     | n |
| Fcnb     | n |
| Cel      | y |
| Ralgds   | n |
| Tsc1     | n |
| Ak8      | n |
| Ttf1     | n |
| Ttf1     | n |
| Ntng2    | n |
| Setx     | n |
| Ntng2    | n |
| Ntng2    | n |
| Setx     | n |
| Setx     | n |
| Rapgef1  | n |
| Rapgef1  | n |
| Trub2    | n |
| Trub2    | n |

|           |   |
|-----------|---|
| Urm1      | n |
| Mir219b   | n |
| Mir219b   | n |
| Mir219b   | n |
| Mir219a-2 | n |
| Mir219b   | n |
| Mir219b   | n |
| Mir219b   | n |
| Mir219a-2 | n |
| Mir219b   | n |
| Mir219a-2 | n |
| Mir219b   | n |
| Mir219b   | n |
| Mir219b   | n |
| Mir219a-2 | n |
| Mir219a-2 | n |
| Mir219b   | n |
| Mir219b   | n |
| Mir219a-2 | n |
| Mir219b   | n |
| Mir219a-2 | n |
| Mir219b   | n |
| Mir219b   | n |
| Mir219a-2 | n |
| Mir219a-2 | n |
| Mir219a-2 | n |
| Mir219b   | n |
| Mir219a-2 | n |
| Mir219b   | n |
| Mir219b   | n |
| Mir219a-2 | n |
| Mir219a-2 | n |
| Mir219a-2 | n |
| Mir219b   | n |

|               |   |
|---------------|---|
| Mir219b       | n |
| Mir219a-2     | n |
| Mir219b       | n |
| Mir219a-2     | n |
| Mir219b       | n |
| Mir219a-2     | n |
| Mir219b       | n |
| Mir219a-2     | n |
| Mir219a-2     | n |
| Mir219b       | n |
| Crat          | n |
| ler5l         | n |
| Cstad         | n |
| Cstad         | n |
| ler5l         | n |
| Cstad         | n |
| ler5l         | n |
| Cstad         | n |
| Cstad         | n |
| ler5l         | n |
| Cstad         | n |
| 1700001O22Rik | n |
| Cstad         | n |
| Cstad         | n |
| Cstad         | n |
| 1700001O22Rik | n |
| 1700001O22Rik | n |
| 1700001O22Rik | n |
| Mir3089       | n |
| 1700001O22Rik | n |
| 1700001O22Rik | n |
| Mir3089       | n |
| 1700001O22Rik | n |
| 1700001O22Rik | n |



|               |   |
|---------------|---|
| Mir3089       | n |
| Mir3089       | n |
| Mir3089       | n |
| 1700001O22Rik | n |
| 1700001O22Rik | y |
| Ptges         | y |
| Ptges         | y |
| Ptges         | y |
| Fnbp1         | n |
| Gpr107        | n |
| Ncs1          | n |
| Abl1          | y |
| Abl1          | y |
| Qrfp          | y |
| Abl1          | y |
| Qrfp          | y |
| Qrfp          | y |
| Abl1          | y |
| Qrfp          | y |
| Abl1          | y |
| Qrfp          | y |
| Qrfp          | y |
| Qrfp          | y |
| Abl1          | y |
| Qrfp          | y |
| Abl1          | y |
| Qrfp          | y |
| Lamc3         | n |
| Fam78a        | n |
| Prrc2b        | n |
| Prrc2b        | n |
| Prrc2b        | n |
| Fam78a        | n |



|               |   |
|---------------|---|
| Angptl2       | y |
| Angptl2       | y |
| Ralgps1       | y |
| Angptl2       | y |
| Ralgps1       | y |
| Angptl2       | y |
| Ralgps1       | y |
| Ralgps1       | y |
| C130021I20Rik | n |
| C130021I20Rik | n |
| Lmx1b         | n |
| C130021I20Rik | n |
| C130021I20Rik | n |
| C130021I20Rik | y |
| Mvb12b        | n |
| Nron          | n |
| Nron          | n |
| Nron          | n |
| Mvb12b        | n |
| Mvb12b        | n |
| Nron          | n |
| Nron          | n |
| Nron          | n |
| Mvb12b        | n |
| Nron          | n |
| Nron          | n |
| Nron          | n |
| Mapkap1       | n |
| Gapvd1        | n |
| Mapkap1       | n |
| Gapvd1        | n |
| Cutal         | y |
| Traf1         | n |
| Traf1         | n |
| Cutal         | n |
| Hc            | n |
| Gsn           | n |

|         |   |
|---------|---|
| Dab2ip  | n |
| Dab2ip  | n |
| Ggta1   | n |
| Ggta1   | n |
| Ggta1   | n |
| Gm13446 | y |
| Gm13446 | n |
| Dab2ip  | y |
| Dab2ip  | n |
| Ttll11  | n |
| Ttll11  | y |
| Ttll11  | y |
| Dab2ip  | n |
| Ttll11  | n |
| Ttll11  | n |
| Ttll11  | n |
| Ptgs1   | n |
| Rbm18   | n |
| Crb2    | n |
| Crb2    | n |
| Dennd1a | n |
| Dennd1a | n |
| Dennd1a | n |
| Crb2    | n |
| Dennd1a | n |
| Crb2    | n |
| Dennd1a | n |
| Crb2    | n |
| Dennd1a | n |
| Dennd1a | n |
| Crb2    | n |
| Crb2    | n |
| Crb2    | y |
| Dennd1a | y |
| Crb2    | y |
| Crb2    | y |
| Dennd1a | y |
| Crb2    | y |

|               |   |
|---------------|---|
| Dennd1a       | y |
| Dennd1a       | y |
| Dennd1a       | y |
| Crb2          | y |
| Dennd1a       | y |
| Crb2          | y |
| Crb2          | y |
| Crb2          | y |
| Dennd1a       | y |
| Crb2          | y |
| Crb2          | y |
| Crb2          | y |
| Dennd1a       | y |
| Dennd1a       | y |
| Dennd1a       | y |
| Crb2          | y |
| Dennd1a       | y |
| Crb2          | y |
| Dennd1a       | y |
| Dennd1a       | y |
| Crb2          | y |
| Crb2          | y |
| Dennd1a       | n |
| Nek6          | y |
| Psmb7         | y |
| Psmb7         | y |
| Psmb7         | n |
| Zeb2          | n |
| Zeb2          | n |
| Zeb2os        | n |
| Zeb2          | n |
| Zeb2os        | n |
| Zeb2          | n |
| 1700019E08Rik | n |
| 1700019E08Rik | n |
| Zeb2          | n |
| Kif5c         | n |
| Lypd6b        | n |

|               |   |
|---------------|---|
| Mmadhc        | n |
| Mmadhc        | n |
| Mmadhc        | n |
| Gm13497       | n |
| Fmnl2         | n |
| Fmnl2         | n |
| Prpf40a       | n |
| 4930555B11Rik | n |
| 4930555B11Rik | n |
| Nr4a2         | n |
| 4930555B11Rik | n |
| Nr4a2         | n |
| 4930555B11Rik | n |
| Upp2          | n |
| Upp2          | n |
| Acvr1         | n |
| Acvr1         | n |
| Acvr1         | n |
| Ccdc148       | y |
| Wdsub1        | y |
| Tanc1         | n |
| Tanc1         | n |
| Wdsub1        | n |
| Wdsub1        | n |
| Tanc1         | n |
| Tanc1         | n |
| Tanc1         | n |
| Gm13580       | n |
| Gm13580       | n |
| Ly75          | n |
| Ly75          | n |
| Pla2r1        | y |
| Gm13580       | n |
| Rbms1         | n |
| Tank          | n |
| Tank          | n |

|               |   |
|---------------|---|
| Tank          | n |
| Dpp4          | n |
| Tank          | n |
| Dpp4          | n |
| Tank          | n |
| Dpp4          | n |
| Dpp4          | n |
| Tbr1          | n |
| Tbr1          | n |
| Dpp4          | n |
| Dpp4          | n |
| Dpp4          | n |
| Tbr1          | n |
| Tbr1          | n |
| Dpp4          | y |
| Figl          | n |
| Grb14         | n |
| Csrnp3        | n |
| Csrnp3        | n |
| Gm13629       | n |
| Scn7a         | n |
| 4933409G03Rik | n |
| Stk39         | n |
| 4933409G03Rik | n |
| Stk39         | n |
| Stk39         | n |
| Bbs5          | n |
| Bbs5          | n |
| Lrp2          | n |
| Mettl5        | n |
| Myo3b         | n |
| Hat1          | n |
| Hat1          | n |
| Slc25a12      | n |
| Slc25a12      | n |
| Mir5098       | n |
| Mir5098       | n |
| Mir5098       | n |
| Rapgef4       | n |
| Rapgef4       | n |
| 6430710C18Rik | n |

|               |   |
|---------------|---|
| 6430710C18Rik | n |
| Cdca7         | n |
| Cdca7         | n |
| Cdca7         | n |
| Sp3os         | n |
| Ola1          | n |
| Sp9           | n |
| Cir1          | n |
| Wipf1         | y |
| Chn1os3       | n |
| Chn1os3       | n |
| Chrna1        | n |
| Chn1os3       | n |
| Chrna1        | n |
| Chn1os3       | n |
| Chrna1        | n |
| Chrna1        | n |
| Chn1os3       | n |
| Hoxd10        | y |
| Hoxd3os1      | y |
| Hoxd3         | y |
| Hoxd3os1      | n |
| Hoxd3         | n |
| Haglr         | n |
| 9430019J16Rik | n |
| Nfe2l2        | n |
| Nfe2l2        | n |
| Agps          | n |
| Agps          | n |
| Agps          | n |
| Nfe2l2        | n |
| Nfe2l2        | n |
| Nfe2l2        | n |
| Agps          | n |
| Nfe2l2        | n |
| Agps          | n |
| Nfe2l2        | n |
| Agps          | n |



|               |   |
|---------------|---|
| Agps          | n |
| Agps          | n |
| Ttc30a2       | n |
| Gm13944       | y |
| Ccdc141       | y |
| Gm13944       | n |
| Gm13944       | n |
| Gm13944       | n |
| Zfp385b       | n |
| Zfp385b       | n |
| Neurod1       | n |
| Frzb          | n |
| Frzb          | n |
| Zfp804a       | n |
| Zswim2        | n |
| Fam171b       | n |
| Btbd18        | n |
| 2700094K13Rik | n |
| Mir130a       | n |
| Ube2l6        | y |
| Ube2l6        | y |
| Serping1      | n |
| Rtn4rl2       | n |
| Rtn4rl2       | n |
| Tnks1bp1      | y |
| Tnks1bp1      | y |
| Tnks1bp1      | y |
| P2rx3         | y |
| P2rx3         | y |
| Tnks1bp1      | y |
| P2rx3         | y |
| P2rx3         | y |
| P2rx3         | y |
| Olfr1274-ps   | n |
| C1qtnf4       | n |
| Slc39a13      | y |
| Slc39a13      | n |
| Acp2          | n |

|               |   |
|---------------|---|
| Lrp4          | y |
| 1110051M20Rik | y |
| Dgkz          | n |
| D930015M05Rik | y |
| Mapk8ip1      | y |
| Prdm11        | n |
| Syt13         | n |
| Syt13         | n |
| 4631405J19Rik | n |
| Prdm11        | n |
| 4631405J19Rik | n |
| 4631405J19Rik | n |
| Trp53i11      | n |
| Prdm11        | n |
| Tspan18       | n |
| Alx4          | n |
| Ext2          | n |
| Ext2          | n |
| Alx4          | y |
| Ext2          | y |
| Ext2          | y |
| Alx4          | y |
| Alx4          | y |
| Ext2          | y |
| Alx4          | y |
| Ext2          | y |
| Ext2          | y |
| Accsl         | n |
| Accsl         | n |
| B230118H07Rik | n |
| Ldlrad3       | n |
| Ldlrad3       | n |
| Cd44          | n |
| Elf5          | n |
| 4930547E08Rik | n |
| Lmo2          | n |
| D430041D05Rik | n |
| D430041D05Rik | y |



|          |   |
|----------|---|
| Ccdc32   | n |
| Chst14   | n |
| Ccdc32   | n |
| Rpusd2   | n |
| Ccdc32   | n |
| Rpusd2   | n |
| Ccdc32   | n |
| Vps18    | n |
| Vps18    | n |
| Gm14207  | n |
| Vps18    | n |
| Gm14207  | n |
| Gm14207  | n |
| Dll4     | n |
| Gm14207  | n |
| Gm14207  | n |
| Dll4     | y |
| Gm14207  | y |
| Dll4     | y |
| Gm14207  | y |
| Dll4     | y |
| Gm14207  | y |
| Dll4     | y |
| Gm14207  | y |
| Ltk      | y |
| Ltk      | y |
| Tyro3    | n |
| Ehd4     | n |
| Ehd4     | n |
| AV039307 | y |

|           |   |
|-----------|---|
| Map1a     | n |
| Map1a     | n |
| Pdia3     | y |
| Eli3      | y |
| Serf2     | y |
| Sord      | n |
| Sord      | y |
| Duox1     | n |
| Duox1     | y |
| Eid1      | n |
| Eid1      | n |
| Eid1      | n |
| Secisbp2l | n |
| Secisbp2l | n |
| Slc27a2   | n |
| Hdc       | y |
| Hdc       | y |
| Slc27a2   | y |
| Hdc       | y |
| Hdc       | y |
| Slc27a2   | n |
| Hdc       | n |
| Hdc       | n |
| Slc27a2   | n |
| Hdc       | n |
| Dusp2     | n |
| Dusp2     | n |
| Fahd2a    | y |
| Kcnip3    | y |
| Mrps5     | y |
| Mrps5     | y |
| Prom2     | y |
| Mrps5     | y |
| Mrps5     | y |
| Mrps5     | y |
| Prom2     | y |
| Mrps5     | y |
| Mrps5     | y |
| Prom2     | y |
| Mrps5     | y |
| Prom2     | y |

|               |   |
|---------------|---|
| Mrps5         | y |
| Prom2         | y |
| Mrps5         | n |
| Mrps5         | n |
| Prom2         | n |
| Bcl2l11       | n |
| Gm14005       | n |
| Gm14005       | n |
| Bcl2l11       | n |
| Slc20a1       | n |
| A730036I17Rik | n |
| Ckap2l        | n |
| F830045P16Rik | n |
| Sirpa         | y |
| Lzts3         | n |
| Itpa          | n |
| Lzts3         | n |
| Atrn          | y |
| Adam33        | n |
| Adam33        | y |
| Cdc25b        | n |
| Cenpb         | y |
| Prn           | n |
| Prn           | n |
| Rassf2        | n |
| Cds2          | n |
| Cds2          | y |
| Cds2          | y |
| Slc23a2       | y |
| Prokr2        | n |
| Crls1         | y |
| Lrrn4         | y |
| Fermt1        | y |
| Plcb1         | n |
| Plcb4         | n |
| 9630028H03Rik | n |
| Plcb4         | n |

|               |   |
|---------------|---|
| 9630028H03Rik | n |
| Plcb4         | n |
| 9630028H03Rik | n |
| Jag1          | y |
| Jag1          | y |
| Btbd3         | y |
| Jag1          | y |
| Btbd3         | y |
| Jag1          | y |
| Jag1          | y |
| Pcsk2         | n |
| Pcsk2         | y |
| Bfsp1         | y |
| Crnkl1        | n |
| Crnkl1        | n |
| Crnkl1        | n |
| Rin2          | n |
| Rin2          | n |
| Rin2          | n |
| Crnkl1        | n |
| Crnkl1        | n |
| Crnkl1        | n |
| Rin2          | n |
| Crnkl1        | n |
| Crnkl1        | n |
| Crnkl1        | n |
| Rin2          | n |
| Crnkl1        | n |
| Rin2          | n |
| Crnkl1        | n |
| Rin2          | n |
| Crnkl1        | n |
| Ralgapa2      | n |
| Ralgapa2      | n |
| A930019D19Rik | n |
| Ralgapa2      | n |
| Ralgapa2      | n |
| Nkx2-4        | n |

|               |   |
|---------------|---|
| Nkx2-2os      | n |
| Foxa2         | n |
| A530006G24Rik | y |
| A530006G24Rik | y |
| Thbd          | y |
| Sstr4         | y |
| Nxt1          | n |
| Napb          | y |
| Gzf1          | y |
| Napb          | y |
| Napb          | y |
| Mir1953       | n |
| Fam110a       | n |
| Slc52a3       | n |
| Slc52a3       | n |
| Fam110a       | n |
| Slc52a3       | y |
| Fam110a       | n |
| Rbck1         | n |
| Gm14164       | y |
| Nrsn2         | y |



|               |   |
|---------------|---|
| Gm14164       | y |
| Nrsn2         | y |
| Gm14164       | y |
| Nrsn2         | y |
| Gm14164       | y |
| Sox12         | n |
| Zcchc3        | n |
| 6820408C15Rik | y |
| 6820408C15Rik | y |
| Zcchc3        | y |
| Zcchc3        | y |
| Zcchc3        | y |
| 6820408C15Rik | y |
| Zcchc3        | y |
| 6820408C15Rik | y |
| 6820408C15Rik | y |
| Zcchc3        | y |
| 6820408C15Rik | y |
| Zcchc3        | y |
| 6820408C15Rik | y |
| Zcchc3        | y |
| Zcchc3        | y |
| Defb25        | y |
| Defb25        | y |
| H13           | n |
| Bcl2l1        | n |
| Bcl2l1        | n |
| H13           | n |
| Bcl2l1        | n |
| H13           | n |
| Bcl2l1        | n |

|               |   |
|---------------|---|
| H13           | n |
| Bcl2l1        | n |
| H13           | n |
| Bcl2l1        | n |
| H13           | n |
| Bcl2l1        | n |
| H13           | n |
| Bcl2l1        | n |
| H13           | n |
| H13           | n |
| Id1           | y |
| Bcl2l1        | n |
| Foxs1         | n |
| Pofut1        | n |
| Kif3b         | n |
| Kif3b         | n |
| Asxl1         | n |
| Nol4l         | n |
| Nol4l         | n |
| Snta1         | n |
| Snta1         | n |
| Snta1         | n |
| Actl10        | y |
| Necab3        | y |
| Actl10        | y |
| Actl10        | y |
| a             | n |
| Trp53inp2     | n |
| Epb4.1l1      | n |
| 2900097C17Rik | y |
| Epb4.1l1      | y |
| Epb4.1l1      | n |

|               |   |
|---------------|---|
| 2900097C17Rik | n |
| Dlgap4        | n |
| Dlgap4        | n |
| Myl9          | y |
| 4930405A21Rik | y |
| 4930405A21Rik | y |
| Myl9          | y |
| 4930405A21Rik | y |
| Tgif2         | n |
| Tgif2         | n |
| Tgif2         | n |
| 5430405H02Rik | n |
| Tgif2         | n |
| Soga1         | n |
| Tldc2         | n |
| Tldc2         | n |
| Soga1         | n |
| Soga1         | y |
| Soga1         | y |
| Soga1         | y |
| Tldc2         | n |
| Tldc2         | n |
| Ghrh          | n |
| Ghrh          | n |
| Ghrh          | n |
| Src           | n |
| Src           | n |
| Blcap         | n |
| Blcap         | n |
| Nnat          | y |
| Blcap         | n |
| Ctnnbl1       | n |
| Ctnnbl1       | n |
| Tti1          | n |
| Mir7685       | y |

|               |   |
|---------------|---|
| Mir7685       | n |
| 9430008C03Rik | y |
| 9430008C03Rik | n |
| Arhgap40      | n |
| Arhgap40      | n |
| Gm14204       | n |
| Arhgap40      | n |
| Gm14204       | y |
| Ppp1r16b      | n |
| Fam83d        | n |
| Gm14204       | n |
| Gm14204       | n |
| Gm826         | n |
| Plcg1         | n |
| Plcg1         | n |
| Zhx3          | n |
| Plcg1         | n |
| Zhx3          | n |
| Gtsf1l        | y |
| Tox2          | n |
| Jph2          | y |
| Ada           | n |
| Ywhab         | n |
| Stk4          | n |
| Stk4          | y |
| Kcns1         | y |
| Matn4         | y |
| Rbpjl         | n |
| Sdc4          | n |
| Rbpjl         | n |
| Sdc4          | n |
| Rbpjl         | n |
| Rbpjl         | n |
| Sdc4          | n |
| Sdc4          | n |
| Rbpjl         | n |

|               |   |
|---------------|---|
| Sdc4          | n |
| Wfdc2         | y |
| Wfdc2         | y |
| Spint3        | y |
| Wfdc2         | y |
| Spint3        | y |
| Wfdc2         | y |
| Wfdc2         | y |
| Spint3        | y |
| Wfdc11        | n |
| Cdh22         | n |
| Cd40          | n |
| Cdh22         | n |
| Cd40          | n |
| Cdh22         | n |
| Cd40          | n |
| Cdh22         | y |
| Cd40          | n |
| Cdh22         | n |
| Cd40          | n |
| Cdh22         | n |
| Cd40          | n |
| Cdh22         | n |
| Cdh22         | n |
| Cd40          | n |
| Slc35c2       | n |
| Slc35c2       | n |
| Cd40          | n |
| 2810408M09Rik | n |
| 2810408M09Rik | n |
| Eya2          | n |
| Zmynd8        | n |
| Zmynd8        | n |
| Eya2          | n |
| Zmynd8        | n |
| Eya2          | y |

|               |   |
|---------------|---|
| Eya2          | y |
| Zmynd8        | y |
| Zmynd8        | y |
| Zmynd8        | y |
| Eya2          | n |
| Eya2          | n |
| Zmynd8        | n |
| Eya2          | y |
| Eya2          | y |
| Zmynd8        | y |
| Ncoa3         | n |
| Ncoa3         | n |
| Zmynd8        | n |
| Ncoa3         | n |
| Zmynd8        | n |
| Ncoa3         | n |
| Zmynd8        | n |
| Ncoa3         | n |
| Zmynd8        | n |
| Ncoa3         | n |
| Zmynd8        | n |
| Ncoa3         | n |
| Zmynd8        | n |
| Ncoa3         | n |
| Zmynd8        | n |
| Ncoa3         | n |
| Zmynd8        | n |
| Ncoa3         | n |
| Sulf2         | y |
| Sulf2         | n |
| Sulf2         | n |
| Sulf2         | n |
| Gm11468       | n |
| Gm11468       | n |
| 5031425F14Rik | n |

|               |   |
|---------------|---|
| Prex1         | n |
| 5031425F14Rik | n |
| Prex1         | n |
| Prex1         | n |
| Mir6364       | n |
| Mir6364       | n |
| Mir6364       | n |
| Prex1         | n |
| Mir6364       | n |
| Prex1         | n |
| Prex1         | n |
| 1500012F01Rik | n |
| 1500012F01Rik | y |
| Kcnb1         | y |
| 1500012F01Rik | y |
| 1500012F01Rik | y |
| Kcnb1         | y |
| Kcnb1         | y |
| 1500012F01Rik | y |
| 1500012F01Rik | y |
| Snai1         | y |
| Spata2        | y |
| Snai1         | y |
| Spata2        | y |
| Spata2        | y |
| Spata2        | y |
| Snai1         | y |
| Spata2        | y |
| Snai1         | y |
| Snai1         | y |
| Snai1         | y |
| Spata2        | y |
| Spata2        | y |
| Spata2        | y |
| Snai1         | n |

|         |   |
|---------|---|
| Snai1   | n |
| Snai1   | n |
| Snai1   | n |
| Ube2v1  | n |
| Ube2v1  | n |
| Snai1   | n |
| Ube2v1  | n |
| Snai1   | n |
| Snai1   | n |
| Ube2v1  | n |
| Snai1   | n |
| Ube2v1  | n |
| Ube2v1  | n |
| Snai1   | n |
| Ube2v1  | n |
| Snai1   | n |
| Snai1   | n |
| Snai1   | n |
| Ube2v1  | n |
| Snai1   | n |
| Ube2v1  | n |
| Snai1   | n |
| Ube2v1  | n |
| Snai1   | n |
| Ube2v1  | n |
| Ube2v1  | n |
| Snai1   | n |
| Cebpb   | n |
| Tmem189 | n |
| Tmem189 | n |
| Cebpb   | y |
| Tmem189 | n |
| Tmem189 | n |



|               |   |
|---------------|---|
| A530013C23Rik | n |
| A530013C23Rik | n |
| Tmem189       | n |
| A530013C23Rik | n |
| Tmem189       | n |
| A530013C23Rik | n |
| A530013C23Rik | n |
| Fam65c        | n |
| Fam65c        | n |
| Fam65c        | n |
| Ptpn1         | n |
| Fam65c        | n |
| Ptpn1         | n |
| E130018N17Rik | n |
| E130018N17Rik | n |
| Kcng1         | n |
| Mocs3         | y |
| Mocs3         | y |
| Mocs3         | n |
| Mocs3         | n |
| Kcng1         | n |
| Kcng1         | n |
| Mocs3         | n |
| Mocs3         | n |
| Nfatc2        | n |
| Mocs3         | n |
| Mocs3         | n |
| Nfatc2        | n |
| Mocs3         | n |
| Mocs3         | n |
| Mocs3         | n |
| Nfatc2        | n |
| Nfatc2        | n |
| Atp9a         | n |
| 1700017J07Rik | y |
| 1700017J07Rik | n |
| Tshz2         | n |
| A630075F10Rik | n |

|          |   |
|----------|---|
| Tshz2    | n |
| Zfp217   | y |
| Zfp217   | y |
| Bcas1os2 | n |
| Zfp217   | n |
| Zfp217   | n |
| Bcas1os2 | n |
| Bcas1os2 | n |
| Zfp217   | n |
| Bcas1os2 | n |
| Zfp217   | n |
| Bcas1    | n |
| Bcas1os2 | n |
| Bcas1    | n |
| Bcas1    | n |
| Bcas1os2 | n |
| Bcas1os2 | n |
| Bcas1os2 | n |
| Bcas1    | n |
| Bcas1    | n |
| Bcas1    | n |
| Bcas1os2 | n |
| Bcas1    | n |
| Pfdn4    | y |
| Gm16796  | n |
| Spo11    | n |
| Rbm38    | y |
| Rbm38    | n |
| Rbm38    | n |
| Ctcf1    | n |
| Ctcf1    | n |
| Ctcf1    | n |
| Pck1     | n |
| Pck1     | n |
| Pmepa1   | n |

|               |   |
|---------------|---|
| Pmepa1        | n |
| Pmepa1        | n |
| Pmepa1        | n |
| Pck1          | n |
| Pck1          | n |
| Pck1          | n |
| Pmepa1        | n |
| Pck1          | n |
| Pmepa1        | n |
| Pmepa1        | n |
| Mir6340       | n |
| Gm10714       | y |
| Stx16         | y |
| Gm10714       | y |
| Stx16         | y |
| Gm10714       | y |
| Gm10714       | y |
| Atp5e         | n |
| Slmo2         | n |
| Phactr3       | y |
| Sycp2         | y |
| Mtg2          | y |
| Rps21         | y |
| Rbbp8nl       | y |
| Gata5         | n |
| Gata5os       | n |
| Gm6307        | n |
| B230312C02Rik | n |
| Slco4a1       | n |
| Slco4a1       | n |
| B230312C02Rik | n |
| B230312C02Rik | n |
| B230312C02Rik | n |

|               |   |
|---------------|---|
| Tcf15         | n |
| Mir124a-3     | n |
| Arfgap1       | y |
| Rtel1         | y |
| Rtel1         | y |
| Rtel1         | n |
| Zbtb46        | y |
| Tcea2         | y |
| Sox18         | y |
| Tcea2         | y |
| Pex2          | y |
| Pex2          | y |
| Hey1          | n |
| 4930539M17Rik | n |
| Tpd52         | n |
| 4930539M17Rik | n |
| C030034L19Rik | n |
| Zfp704        | n |
| Car1          | y |
| Mtfr1         | n |
| Mtfr1         | n |
| Pde7a         | n |
| Pde7a         | n |
| Spata16       | n |
| Ect2          | n |
| Ect2          | n |
| Tnfsf10       | n |
| Ect2          | n |
| Tnfsf10       | n |
| Ect2          | n |
| Ect2          | n |
| Ect2          | n |
| Fndc3b        | n |
| Tmem212       | y |
| Mannr         | n |
| Mynn          | n |
| Mynn          | n |
| Mecom         | n |
| Mynn          | n |
| Mecom         | n |
| Mecom         | n |

|               |   |
|---------------|---|
| Sox2ot        | n |
| Gm6639        | n |
| 4932438A13Rik | n |
| 4932438A13Rik | n |
| Trpc3         | n |
| Trpc3         | n |
| Trpc3         | n |
| Il21          | n |
| Gm5148        | n |
| Gm5148        | n |
| Spry1         | n |
| Spry1         | n |
| Gm5148        | n |
| Spry1         | n |
| Gm5148        | n |
| Gm5148        | n |
| Jade1         | n |
| C430002E04Rik | n |
| C430002E04Rik | n |
| C430002E04Rik | n |
| Jade1         | n |
| C430002E04Rik | n |
| Jade1         | n |
| C430002E04Rik | n |
| Jade1         | n |
| Jade1         | n |
| Sclt1         | n |
| Ccrn4l        | y |
| Naa15         | y |
| Setd7         | n |
| Maml3         | n |
| Foxo1         | n |
| Maml3         | n |
| Maml3         | n |
| Maml3         | n |
| Gm2447        | n |
| Gm20750       | n |
| Cog6          | n |
| Tm4sf4        | n |
| Wwtr1         | n |
| 1700007F19Rik | n |

|               |   |
|---------------|---|
| 1700007F19Rik | n |
| Med12l        | n |
| Med12l        | n |
| Clrn1         | n |
| Med12l        | n |
| Clrn1         | n |
| Med12l        | n |
| Clrn1         | n |
| Med12l        | n |
| Med12l        | n |
| Med12l        | n |
| Arhgef26      | y |
| Dhx36         | y |
| Dhx36         | y |
| Kcnab1        | n |
| Tiparp        | n |
| 4931440P22Rik | n |
| Lekr1         | n |
| Lekr1         | n |
| Ccnl1         | n |
| Ccnl1         | n |
| Ift80         | n |
| Ift80         | n |
| Ift80         | y |
| Smc4          | n |
| Ift80         | n |
| 4921511C10Rik | n |
| Fnip2         | n |
| Etfdh         | n |
| Fam198b       | n |
| Gria2         | y |
| Gm6525        | n |
| Gm6525        | n |
| Gm6525        | n |
| Mnd1          | n |
| Trim2         | n |
| Trim2         | n |
| Trim2         | n |
| Gm6525        | n |
| Trim2         | y |
| Trim2         | y |

|               |   |
|---------------|---|
| 4930565D16Rik | n |
| Tigd4         | n |
| Fhdc1         | n |
| Fhdc1         | y |
| Fhdc1         | y |
| Arfip1        | n |
| Tmem154       | y |
| Arfip1        | y |
| Dear1         | n |
| Dear1         | n |
| 1700036G14Rik | n |
| Dear1         | n |
| 1700036G14Rik | n |
| Sh3d19        | n |
| Sh3d19        | n |
| Lrba          | y |
| Lrba          | y |
| Kirrel        | n |
| Kirrel        | n |
| Lrrc71        | y |
| Insrr         | n |
| Insrr         | n |
| Insrr         | n |
| Ntrk1         | n |
| Insrr         | n |
| Insrr         | n |
| Ntrk1         | n |
| Insrr         | n |
| Bcan          | n |
| Nes           | y |
| Bcan          | y |
| Nes           | y |
| Bcan          | y |
| Bcan          | n |
| Bcan          | n |
| Bcan          | n |
| Gpatch4       | n |
| Mef2d         | n |
| Mef2d         | n |
| 1700113A16Rik | n |
| Mef2d         | n |





|         |   |
|---------|---|
| Mex3a   | n |
| Mir1905 | n |
| Mex3a   | n |
| Mir1905 | n |
| Mex3a   | n |
| Mir1905 | n |
| Mex3a   | n |
| Mex3a   | n |
| Mex3a   | n |
| Mir1905 | n |
| Mex3a   | n |
| Mir1905 | n |
| Mex3a   | n |
| Mex3a   | n |
| Mex3a   | n |
| Mir1905 | n |
| Mex3a   | n |
| Mex3a   | n |
| Arhgef2 | n |
| Rxfp4   | n |
| Krtcap2 | y |
| Trim46  | y |
| Krtcap2 | y |
| Trim46  | y |
| Dpm3    | y |
| Dpm3    | n |
| Gm15417 | y |
| Adam15  | y |
| Gm15417 | y |
| Adam15  | y |
| Gm15417 | n |
| Gm15417 | n |
| Zbtb7b  | n |
| Zbtb7b  | y |

|         |   |
|---------|---|
| Ube2q1  | n |
| Ube2q1  | n |
| Chrn2   | n |
| Il6ra   | y |
| Il6ra   | y |
| She     | n |
| She     | n |
| She     | y |
| Slc39a1 | y |
| Slc39a1 | y |
| Slc39a1 | y |
| Creb3l4 | y |
| Slc39a1 | y |
| Creb3l4 | y |
| Ilf2    | y |
| Npr1    | y |
| Ilf2    | y |
| Npr1    | y |
| Ilf2    | y |
| Rorc    | y |
| Riad1   | n |
| Zfp687  | y |
| Pi4kb   | n |
| Pi4kb   | n |
| Lysmd1  | y |
| Sema6c  | n |
| Sema6c  | n |
| Sema6c  | n |
| Gabpb2  | n |
| Gabpb2  | n |
| Sema6c  | n |
| Sema6c  | n |
| Gabpb2  | n |
| Gabpb2  | n |
| Gabpb2  | n |

|          |   |
|----------|---|
| Gabpb2   | n |
| Gabpb2   | n |
| Sema6c   | n |
| Gabpb2   | n |
| Sema6c   | n |
| Gabpb2   | n |
| Sema6c   | n |
| Mllt11   | n |
| Mllt11   | n |
| Gm128    | y |
| Cdc42se1 | y |
| Gm128    | y |
| Mcl1     | n |
| Mcl1     | n |
| Mcl1     | n |
| Adamtsl4 | n |
| Mcl1     | n |
| Adamtsl4 | n |
| Adamtsl4 | n |
| Adamtsl4 | n |
| Mcl1     | n |
| Adamtsl4 | n |
| Mcl1     | n |
| Hfe2     | n |
| BC107364 | n |
| Hfe2     | n |
| BC107364 | n |
| Gm15441  | n |
| Polr3gl  | n |
| Ankrd34a | n |
| Ankrd34a | n |

|         |   |
|---------|---|
| Polr3gl | n |
| Pdzk1   | n |
| Acp6    | n |
| Bcl9    | n |
| Mir378c | n |
| Mir378c | n |
| Bcl9    | n |
| Chd1l   | n |
| Pde4dip | n |
| Notch2  | n |
| Pde4dip | n |
| Hao2    | n |
| Cd101   | n |
| Trim45  | n |
| Igsf3   | n |
| Igsf3   | n |
| Ptgfrn  | n |
| Igsf3   | n |
| Igsf3   | n |
| Igsf3   | n |
| Cd2     | n |
| Cd2     | n |
| Igsf3   | n |
| Igsf3   | n |
| Igsf3   | n |
| Mab21l3 | n |
| Casq2   | n |
| Vangl1  | n |
| Dennd2c | n |
| Trim33  | n |
| Atg4a   | n |
| Atg4a   | n |
| Syt6    | n |
| Gm15471 | n |

|               |   |
|---------------|---|
| Phtf1         | n |
| Lrig2         | n |
| Lrig2         | n |
| Lrig2         | n |
| Ppm1j         | n |
| Ppm1j         | n |
| Rhoc          | y |
| Rhoc          | y |
| Mov10         | y |
| Rhoc          | y |
| Mov10         | y |
| Rhoc          | n |
| Rhoc          | n |
| Mov10         | n |
| Rhoc          | n |
| Mov10         | n |
| 4930564D02Rik | n |
| Kcnd3         | n |
| Kcnd3os       | n |
| Kcnd3os       | n |
| Kcnd3os       | n |
| Fam212b       | y |
| Fam212b       | y |
| Fam212b       | n |
| Tmigd3        | n |
| Amigo1        | n |
| Amigo1        | n |
| Cyb561d1      | n |
| Amigo1        | n |
| Cyb561d1      | n |
| Amigo1        | n |
| Cyb561d1      | n |
| Amigo1        | n |
| Amigo1        | n |
| Amigo1        | n |

|          |   |
|----------|---|
| Amigo1   | n |
| Cyb561d1 | n |
| Psrc1    | n |
| Psrc1    | n |
| Gpsm2    | n |
| Aknad1   | n |
| Gpsm2    | n |
| Henmt1   | n |
| S1pr1    | n |
| Extl2    | n |
| Extl2    | n |
| Extl2    | n |
| Vcam1    | n |
| Alg14    | n |
| Cnn3     | n |
| Slc44a3  | y |
| Cnn3     | y |
| Slc44a3  | y |
| Cnn3     | y |
| Cnn3     | y |
| F3       | y |
| Arhgap29 | n |
| Abcd3    | n |
| Abcd3    | n |
| Abca4    | n |
| Abcd3    | n |
| Abcd3    | n |
| Abca4    | y |
| Abca4    | y |
| Abcd3    | y |
| Abca4    | y |
| Abca4    | y |
| Abcd3    | y |
| Abcd3    | y |
| Abca4    | y |
| Abcd3    | y |
| Abca4    | y |
| Abca4    | y |
| Abca4    | y |
| Abcd3    | y |
| Abcd3    | y |



|               |   |
|---------------|---|
| Neurog2       | n |
| Alpk1         | n |
| D030025E07Rik | n |
| Gm5712        | n |
| Egf           | n |
| Lrit3         | n |
| Col25a1       | n |
| Col25a1       | n |
| Lef1          | n |
| Lef1          | n |
| Lef1          | n |
| Hadh          | n |
| Lef1          | n |
| Lef1          | n |
| Cyp2u1        | y |
| Tet2          | n |
| Ppa2          | n |
| Tet2          | n |
| Tet2          | n |
| Nfkb1         | n |
| Manba         | n |
| Manba         | n |
| Ppp3ca        | n |
| Gm4861        | n |
| Lamtor3       | n |
| Gm5105        | n |
| Trmt10a       | n |
| Rap1gds1      | n |
| Rap1gds1      | n |
| Stpg2         | n |



|               |   |
|---------------|---|
| Rap1gds1      | n |
| Stpg2         | n |
| 15-Sep        | n |
| 15-Sep        | n |
| Hs2st1        | n |
| Hs2st1        | n |
| 15-Sep        | n |
| Hs2st1        | n |
| 15-Sep        | n |
| Hs2st1        | n |
| Ddah1         | n |
| Cyr61         | n |
| 2410004B18Rik | n |
| 2410004B18Rik | n |
| 2410004B18Rik | n |
| Wdr63         | n |
| Mcoln2        | n |
| Wdr63         | n |
| Gm10636       | n |
| Gm10636       | y |
| Gm10636       | y |
| Gm10636       | y |
| Ssx2ip        | y |
| Gm1653        | n |
| Lphn2         | n |
| Gm1653        | n |
| Lphn2         | n |
| Lphn2         | n |
| Elt1d1        | n |
| Gipc2         | y |
| Fubp1         | y |
| Fubp1         | y |
| Nexn          | y |
| Fubp1         | y |
| St6galnac5    | n |
| Lhx8          | n |
| Slc44a5       | n |
| Negr1         | n |

|               |   |
|---------------|---|
| Lrrc40        | n |
| Gm20752       | n |
| Lyn           | y |
| Gm11780       | n |
| Car8          | n |
| Chd7          | n |
| Asph          | n |
| Clvs1         | n |
| Asph          | n |
| 2610301B20Rik | n |
| Mir684-2      | n |
| Esrp1         | y |
| Esrp1         | y |
| Cdh17         | n |
| Triqk         | n |
| Fam92a        | n |
| Fam92a        | n |
| Fam92a        | n |
| Triqk         | n |
| Slc26a7       | y |
| Runx1t1       | y |
| Runx1t1       | y |
| Runx1t1       | y |
| Slc26a7       | y |
| Slc7a13       | n |
| Ttpa          | y |
| 4930480G23Rik | y |
| 4930480G23Rik | n |
| Map3k7        | n |
| Bach2os       | n |
| Map3k7        | n |
| Bach2os       | n |
| Ankrd6        | n |
| Ankrd6        | n |
| Lym2          | n |
| Ube2j1        | y |
| 4933421O10Rik | y |
| 4933421O10Rik | y |

|               |   |
|---------------|---|
| Pm20d2        | y |
| Pnrc1         | n |
| Cga           | n |
| 4933428C19Rik | y |
| Dnaja1        | n |
| Smu1          | n |
| Aqp3          | n |
| Dnaic1        | y |
| Fam219a       | y |
| Dnaic1        | y |
| Dnaic1        | y |
| Fam219a       | n |
| Dnaic1        | n |
| Dnaic1        | n |
| Galt          | y |
| Galt          | n |
| Rpp25l        | y |
| Rpp25l        | y |
| Galt          | y |
| Galt          | n |
| Galt          | n |
| N28178        | n |
| BC049635      | n |
| Dnajb5        | n |
| Vcp           | n |
| Dnajb5        | n |
| Dnajb5        | n |
| Vcp           | n |
| Rusc2         | y |
| Fam166b       | y |
| Fam166b       | y |
| Rusc2         | n |
| Fam166b       | n |
| Fam166b       | n |
| Msmg          | y |
| Spag8         | y |
| Npr2          | y |
| Npr2          | y |
| Npr2          | y |
| Spag8         | y |
| Npr2          | y |

|               |   |
|---------------|---|
| Spag8         | y |
| Npr2          | y |
| Spag8         | y |
| Npr2          | y |
| Spag8         | y |
| 5430416O09Rik | n |
| Reck          | n |
| Olfr157       | n |
| Olfr157       | n |
| Grhpr         | y |
| Slc25a51      | n |
| Dcaf10        | n |
| Shb           | n |
| Gm829         | n |
| Gm12409       | n |
| Gm829         | n |
| Gm12409       | n |
| Aldh1b1       | n |
| Gm12409       | n |
| Igfbpl1       | n |
| Stra6l        | n |
| Stra6l        | n |
| Igfbpl1       | n |
| Igfbpl1       | n |
| Stra6l        | n |
| Tdrd7         | n |
| Tstd2         | n |
| Tstd2         | n |
| Foxe1         | n |
| Nans          | n |
| Nans          | n |
| Tbc1d2        | n |
| Tbc1d2        | n |
| Nans          | n |

|          |   |
|----------|---|
| Tbc1d2   | n |
| Tbc1d2   | n |
| Tbc1d2   | n |
| Nans     | n |
| Gabbr2   | n |
| Gabbr2   | n |
| Gabbr2   | n |
| Galnt12  | n |
| Anks6    | n |
| Galnt12  | n |
| Anks6    | n |
| Col15a1  | n |
| Alg2     | n |
| Alg2     | n |
| Alg2     | n |
| Msantd3  | y |
| Tex10    | y |
| Tmeff1   | y |
| Tex10    | y |
| Tmeff1   | y |
| Tex10    | y |
| Tex10    | y |
| Tex10    | y |
| Zfp189   | n |
| Zfp189   | n |
| Baat     | n |
| Baat     | n |
| Rnf20    | y |
| Actl7a   | n |
| Fam206a  | y |
| Frrs1l   | y |
| Ptpn3    | n |
| Akap2    | y |
| Zkscan16 | n |
| Ptbp3    | n |
| Inip     | n |
| Snx30    | n |
| Rgs3     | n |

|               |   |
|---------------|---|
| Pole3         | n |
| Pole3         | n |
| Orm2          | y |
| 6330416G13Rik | n |
| Kdm4c         | n |
| Ptprd         | n |
| Lurap1l       | n |
| Mpdz          | n |
| Mpdz          | n |
| Nfib          | n |
| Gm5860        | n |
| Gm5860        | n |
| Nfib          | n |
| Gm5860        | n |
| Zdhhc21       | n |
| Ccdc171       | n |
| Cdkn2a        | y |
| Dmrta1        | n |
| Zfp352        | n |
| Elavl2        | n |
| Jun           | n |
| Jun           | n |
| E130114P18Rik | y |
| E130114P18Rik | y |
| Kank4os       | n |
| Kank4         | n |
| Atg4c         | n |
| Itgb3bp       | n |
| Foxd3         | y |
| Ror1          | n |
| Pde4b         | n |
| Pde4b         | y |
| Gm12709       | y |
| Pde4b         | y |
| Gm12709       | y |
| Gm12709       | n |
| Wdr78         | n |
| Prkaa2        | n |
| Ppap2b        | y |
| Ppap2b        | y |
| Prkaa2        | n |

|         |   |
|---------|---|
| Usp24   | n |
| Pcsk9   | n |
| Pcsk9   | n |
| Bsnd    | n |
| Acot11  | n |
| Ssbp3   | n |
| Acot11  | n |
| Acot11  | n |
| Ssbp3   | n |
| Ssbp3   | n |
| Mrpl37  | n |
| Ssbp3   | n |
| Ssbp3   | n |
| Ssbp3   | n |
| Mrpl37  | n |
| Mrpl37  | n |
| Cdcp2   | n |
| Cdcp2   | n |
| Tceanc2 | n |
| Tceanc2 | n |
| Cdcp2   | n |
| Tceanc2 | n |
| Tceanc2 | n |
| Cdcp2   | n |
| Tceanc2 | n |
| Tceanc2 | n |
| Tceanc2 | n |
| Yipf1   | n |
| Dio1    | n |
| Dio1    | y |
| Dmrtb1  | n |
| Slc1a7  | n |
| Podn    | y |
| Slc1a7  | y |
| Zcchc11 | y |
| Gpx7    | y |
| Gpx7    | y |

|         |   |
|---------|---|
| Faf1    | n |
| Cdkn2c  | n |
| Cdkn2c  | n |
| Skint6  | n |
| Skint5  | y |
| Skint5  | n |
| Trabd2b | n |
| Trabd2b | n |
| Foxd2   | n |
| Foxd2   | n |
| Trabd2b | n |
| Foxd2   | n |
| Trabd2b | n |
| Foxd2   | n |
| Trabd2b | n |
| Foxd2   | n |
| Foxd2   | n |
| Foxd2   | n |
| Trabd2b | n |
| Foxd2   | n |
| Trabd2b | n |
| Trabd2b | n |
| Foxd2   | n |
| Trabd2b | n |
| Foxd2   | n |
| Trabd2b | n |
| Foxd2   | n |
| Trabd2b | n |
| Foxd2   | n |
| Trabd2b | n |
| Foxd2   | n |
| Trabd2b | n |
| Foxd2   | n |
| Foxd2   | n |
| Foxd2   | n |
| Gm12830 | n |
| Foxd2   | n |
| Gm12830 | n |
| Foxd2os | y |
| Foxd2os | y |
| Foxd2os | y |



|         |   |
|---------|---|
| Foxd2os | y |
| Foxd2os | y |
| Foxd2   | y |
| Foxd2os | y |
| Foxd2os | y |
| Foxd2   | n |
| Foxd2   | n |
| Tal1    | n |
| Cyp4x1  | n |
| Mknk1   | n |
| Kcnk    | n |
| Faah    | n |
| Hpdl    | y |
| Mutyh   | y |
| Mutyh   | y |
| Mutyh   | y |
| Hpdl    | y |
| Urod    | n |
| Urod    | n |
| Urod    | n |
| Btbd19  | n |
| Tmem53  | n |
| Rnf220  | n |
| Tmem53  | n |
| Tmem53  | n |
| Rnf220  | n |
| Dmap1   | n |
| Slc6a9  | y |
| Ccdc24  | y |
| Slc6a9  | n |
| Slc6a9  | n |
| B4galt2 | y |
| Slc6a9  | n |
| Ptprf   | n |
| Ptprf   | n |
| Hyi     | n |
| Hyi     | y |
| Hyi     | y |
| Ptprf   | y |
| Hyi     | y |
| Hyi     | y |

|               |   |
|---------------|---|
| Hyi           | n |
| Med8          | n |
| Med8          | n |
| Szt2          | n |
| 2610528J11Rik | n |
| Tmem125       | n |
| Olfr1338      | n |
| Lao1          | n |
| Olfr1328      | n |
| Lao1          | n |
| Slc2a1        | n |
| Slc2a1        | n |
| Slc2a1        | n |
| Zfp691        | n |
| Slc2a1        | n |
| Slc2a1        | n |
| Zfp691        | n |
| Slc2a1        | n |
| Zfp691        | n |
| Zfp691        | n |
| Zfp691        | n |
| Slc2a1        | n |
| Zfp691        | n |
| Slc2a1        | n |
| Zfp691        | n |
| Zfp691        | n |
| Zfp691        | n |
| Slc2a1        | n |
| Zfp691        | n |
| Slc2a1        | n |
| Zfp691        | n |
| Zfp691        | n |

|          |   |
|----------|---|
| Slc2a1   | n |
| Zfp691   | n |
| Slc2a1   | n |
| Zfp691   | n |
| Zfp691   | y |
| Ybx1     | y |
| Foxo6    | n |
| Hivep3   | n |
| Foxo6    | n |
| Edn2     | n |
| Edn2     | n |
| Edn2     | n |
| Foxo6    | n |
| Scmh1    | n |
| Cited4   | y |
| Kcnq4    | y |
| Cited4   | y |
| Mir30f   | y |
| Kcnq4    | y |
| Kcnq4    | n |
| Zmpste24 | n |
| Gm12888  | n |
| Gm12888  | n |
| Mfsd2a   | n |
| Mycl     | n |
| Bmp8b    | y |
| Nt5c1a   | y |
| Ppie     | y |
| Nt5c1a   | y |
| Ppie     | y |
| Nt5c1a   | y |
| Ppie     | y |
| Heyl     | n |
| Heyl     | n |
| Heyl     | n |
| Bmp8a    | n |
| Macf1    | y |

|               |   |
|---------------|---|
| Macf1         | y |
| Macf1         | n |
| Mycbp         | n |
| 1700057H15Rik | n |
| Rragc         | n |
| 1700057H15Rik | n |
| Pou3f1        | n |
| Rspo1         | n |
| Rspo1         | n |
| Cdca8         | n |
| Rspo1         | n |
| Cdca8         | n |
| Cdca8         | n |
| Rspo1         | n |
| Rspo1         | n |
| Zc3h12a       | n |
| Zc3h12a       | n |
| Oscp1         | n |
| Sh3d21        | n |
| Eva1b         | y |
| Eva1b         | y |
| Eva1b         | y |
| Sh3d21        | y |
| Sh3d21        | y |
| Sh3d21        | y |
| Eva1b         | n |
| Eva1b         | n |
| Sh3d21        | n |
| Sh3d21        | n |
| Eva1b         | n |
| Sh3d21        | n |
| Eva1b         | n |
| Eva1b         | n |
| Thrap3        | n |
| Trappc3       | y |
| Trappc3       | y |
| Col8a2        | y |

|         |   |
|---------|---|
| Col8a2  | y |
| Adprhl2 | y |
| Adprhl2 | y |
| Col8a2  | n |
| Col8a2  | n |
| Adprhl2 | n |
| Tekt2   | y |
| Col8a2  | y |
| Col8a2  | y |
| Tekt2   | y |
| Col8a2  | y |
| Col8a2  | y |
| Tekt2   | y |
| Zmym4   | n |
| Smim12  | n |
| Smim12  | n |
| Gja4    | y |
| Gja4    | y |
| Csmd2   | y |
| Csmd2   | n |
| Zfp362  | n |
| Trim62  | n |
| Zfp362  | n |
| Ak2     | n |
| Ak2     | y |
| Ak2     | y |
| Azin2   | y |
| Azin2   | y |
| Ak2     | n |
| Rnf19b  | n |
| Hpca    | n |
| Hpca    | y |
| Yars    | y |
| Yars    | y |
| C77080  | y |
| C77080  | y |
| C77080  | n |
| Yars    | y |
| C77080  | n |
| C77080  | y |
| Rbbp4   | y |



|               |   |
|---------------|---|
| Khdrbs1       | n |
| Ptp4a2        | n |
| Ptp4a2        | n |
| Khdrbs1       | n |
| Khdrbs1       | n |
| Khdrbs1       | n |
| Hcrtr1        | n |
| Bai2          | n |
| Hcrtr1        | n |
| Col16a1       | n |
| Col16a1       | n |
| Col16a1       | n |
| Hcrtr1        | n |
| Col16a1       | n |
| Col16a1       | n |
| Col16a1       | n |
| Hcrtr1        | n |
| Tinagl1       | n |
| Pef1          | y |
| Pef1          | y |
| Tinagl1       | y |
| Pef1          | y |
| Tinagl1       | y |
| Pef1          | y |
| Tinagl1       | y |
| Tinagl1       | y |
| Pef1          | y |
| Tinagl1       | y |
| Tinagl1       | y |
| Fabp3         | n |
| A930031H19Rik | n |
| Lptm5         | n |
| Ptpru         | n |
| Mecr          | n |
| Ptpru         | n |
| Ptpru         | n |
| Mecr          | n |
| Tmem200b      | n |

|          |   |
|----------|---|
| Tmem200b | n |
| Tmem200b | n |
| Gm12992  | n |
| Gm12992  | n |
| Gm12992  | y |
| Tmem200b | y |
| Tmem200b | y |
| Tmem200b | y |
| Epb4.1   | y |
| Dnajc8   | n |
| Dnajc8   | n |
| Dnajc8   | n |
| Sesn2    | n |
| Sesn2    | n |
| Dnajc8   | n |
| Atpif1   | n |
| Atpif1   | n |
| Atpif1   | n |
| Dnajc8   | n |
| Ptafr    | y |
| Atpif1   | y |
| Xkr8     | n |
| Rpa2     | n |
| Fam76a   | n |
| Fgr      | n |
| Fgr      | n |
| Fam76a   | n |
| Ahdc1    | n |
| Gpr3     | n |
| Wasf2    | n |
| Wasf2    | n |
| Gpr3     | n |
| Gpr3     | n |
| Gpr3     | n |
| Wasf2    | n |
| Wasf2    | n |
| Cd164l2  | y |
| Map3k6   | n |



|               |   |
|---------------|---|
| Sytl1         | n |
| Wdte1         | n |
| Wdte1         | n |
| Slc9a1        | n |
| Trnp1         | n |
| Kdf1          | y |
| Nudc          | y |
| Nudc          | y |
| Kdf1          | y |
| Kdf1          | y |
| Gpn2          | n |
| Gpn2          | n |
| Arid1a        | n |
| Gpn2          | n |
| Gpn2          | n |
| Rps6ka1       | n |
| Rps6ka1       | n |
| Aim1          | n |
| Rps6ka1       | n |
| Aim1          | n |
| Rps6ka1       | n |
| Aim1          | n |
| Cd52          | n |
| Aim1          | n |
| Cnksr1        | y |
| E130218I03Rik | n |
| Grrp1         | y |
| Pdik1l        | y |
| 1700021N21Rik | n |
| Stmn1         | n |
| 1700021N21Rik | n |
| Stmn1         | n |

|               |   |
|---------------|---|
| Stmn1         | n |
| 1700021N21Rik | n |
| Stmn1         | n |
| Stmn1         | n |
| 1700021N21Rik | n |
| 1700021N21Rik | n |
| Stmn1         | n |
| Aunip         | n |
| Man1c1        | n |
| Rhd           | y |
| Rhd           | y |
| Tmem57        | n |
| Tmem50a       | n |
| Runx3         | n |
| Runx3         | n |
| Runx3         | n |
| Clic4         | n |
| Runx3         | n |
| Clic4         | n |
| Clic4         | n |
| Runx3         | n |
| Runx3         | n |
| Clic4         | n |
| Runx3         | n |
| Clic4         | n |
| Runx3         | n |
| Clic4         | n |
| Runx3         | n |
| Clic4         | n |
| Runx3         | n |
| Runx3         | n |
| Runx3         | n |
| Clic4         | n |

|        |   |
|--------|---|
| Runx3  | n |
| Clic4  | n |
| Runx3  | n |
| Clic4  | n |
| Runx3  | n |
| Clic4  | n |
| Clic4  | n |
| Runx3  | n |
| Runx3  | n |
| Runx3  | n |
| Clic4  | n |
| Clic4  | n |
| Runx3  | n |
| Clic4  | n |
| Runx3  | n |
| Clic4  | n |
| Clic4  | n |
| Clic4  | n |
| Runx3  | n |
| Clic4  | n |
| Runx3  | n |
| Clic4  | n |
| Clic4  | n |
| Clic4  | n |
| Stpg1  | y |
| Stpg1  | y |
| Stpg1  | n |
| Stpg1  | n |
| Stpg1  | y |
| Stpg1  | y |
| Nipal3 | y |
| Stpg1  | y |
| Stpg1  | y |
| Nipal3 | y |
| Nipal3 | y |
| Stpg1  | n |

|         |   |
|---------|---|
| Stpg1   | n |
| Stpg1   | n |
| Stpg1   | n |
| Grhl3   | n |
| Grhl3   | n |
| Grhl3   | n |
| Stpg1   | n |
| Stpg1   | n |
| Il22ra1 | n |
| Srsf10  | n |
| Pnrc2   | n |
| Id3     | n |
| Rpl11   | n |
| Rpl11   | n |
| Rpl11   | n |
| Id3     | n |
| Id3     | n |
| Rpl11   | n |
| Id3     | n |
| Id3     | n |
| Rpl11   | n |
| Rpl11   | n |
| Rpl11   | n |
| E2f2    | n |
| Rpl11   | n |
| Asap3   | n |
| Kdm1a   | y |
| Kdm1a   | n |
| Ephb2   | n |
| Lactbl1 | n |
| Lactbl1 | n |
| Ephb2   | n |
| Lactbl1 | n |
| Lactbl1 | n |
| Ephb2   | n |

|         |   |
|---------|---|
| Ephb2   | n |
| Lactbl1 | n |
| Lactbl1 | n |
| Lactbl1 | n |
| Ephb2   | n |
| Ephb2   | n |
| Lactbl1 | y |
| Lactbl1 | y |
| Ephb2   | y |
| Lactbl1 | y |
| Ephb2   | y |
| Lactbl1 | y |
| Ephb2   | y |
| Lactbl1 | y |
| Ephb2   | y |
| Lactbl1 | y |
| Lactbl1 | y |
| Ephb2   | y |
| Ephb2   | y |
| Lactbl1 | y |
| Ephb2   | y |
| Lactbl1 | n |
| C1qb    | n |
| C1qb    | n |
| Lactbl1 | n |
| C1qb    | n |
| Lactbl1 | n |
| Lactbl1 | n |
| C1qb    | n |
| Lactbl1 | n |
| C1qb    | n |
| Lactbl1 | n |
| C1qb    | n |
| C1qb    | n |
| C1qb    | y |
| C1qc    | y |
| Gm13003 | n |
| Gm13003 | n |
| Gm13003 | n |
| Cela3b  | y |
| Cela3b  | n |

|         |   |
|---------|---|
| Cela3b  | n |
| Cela3b  | n |
| Hspg2   | n |
| Hspg2   | n |
| Ldlrad2 | n |
| Alpl    | n |
| Alpl    | n |
| Rap1gap | n |
| Rap1gap | n |
| Alpl    | n |
| Rap1gap | n |
| Alpl    | n |
| Rap1gap | n |
| Alpl    | n |
| Alpl    | n |
| Rap1gap | n |
| Alpl    | n |
| Alpl    | n |
| Alpl    | n |
| Ece1    | n |
| Ece1    | n |
| Alpl    | n |
| Alpl    | n |
| Alpl    | n |
| Ece1    | n |
| Ece1    | n |
| Alpl    | n |
| Ece1    | n |
| Alpl    | n |
| Ece1    | n |
| Alpl    | n |
| Alpl    | n |
| Alpl    | n |
| Ece1    | n |
| Ece1    | n |
| Alpl    | n |
| Fam43b  | n |
| Fam43b  | n |
| Mul1    | n |
| Mul1    | n |
| Vwa5b1  | n |

|           |   |
|-----------|---|
| Vwa5b1    | n |
| Pla2g2a   | n |
| Minos1    | n |
| Minos1    | n |
| Minos1    | n |
| Ubr4      | n |
| Pax7      | n |
| Iffo2     | n |
| Pax7      | n |
| Klhdc7a   | n |
| Tas1r2    | n |
| Arhgef10l | n |
| Rcc2      | n |
| Arhgef10l | y |
| Arhgef10l | y |
| Rcc2      | y |
| Arhgef10l | y |
| Padi6     | y |
| Rcc2      | n |
| Rcc2      | n |
| Rcc2      | n |
| Padi4     | n |
| Padi4     | n |
| Rcc2      | n |
| Rcc2      | n |
| Padi4     | n |
| Padi4     | n |
| Rcc2      | n |
| Padi4     | n |
| Gm13032   | n |
| Padi3     | n |

|               |   |
|---------------|---|
| Gm13032       | n |
| Gm13032       | n |
| Padi1         | n |
| Padi1         | n |
| 4930515B02Rik | n |
| 4930515B02Rik | n |
| 4930515B02Rik | n |
| Padi1         | n |
| 4930515B02Rik | n |
| Padi1         | n |
| Padi1         | n |
| Padi1         | n |
| Gm13031       | n |
| Sdhb          | n |
| Sdhb          | n |
| Crocc         | y |
| Crocc         | y |
| Crocc         | y |
| Rsg1          | n |
| Rsg1          | n |
| Arhgef19      | y |
| Arhgef19      | n |
| Epha2         | n |
| Clcnka        | n |



|               |   |
|---------------|---|
| Epha2         | n |
| Epha2         | n |
| Clcnka        | n |
| Clcnka        | n |
| Epha2         | n |
| Clcnka        | n |
| Clcnka        | n |
| Epha2         | n |
| Clcnka        | n |
| Epha2         | n |
| Epha2         | n |
| Clcnka        | y |
| Hspb7         | y |
| Fblim1        | n |
| B330016D10Rik | n |
| Fblim1        | n |
| B330016D10Rik | n |
| Fblim1        | n |
| B330016D10Rik | n |
| Fblim1        | n |
| AI507597      | y |
| Ctrcos        | n |
| Ctrcos        | n |
| Ctrcos        | n |
| Efhd2         | n |
| Ctrcos        | n |
| Ctrcos        | n |
| Efhd2         | n |
| Ctrcos        | n |
| Fhad1os1      | n |
| Tmem51os1     | n |
| Tmem51        | n |

|           |   |
|-----------|---|
| Tmem51    | n |
| Tmem51os1 | n |
| Tmem51os1 | n |
| Tmem51    | n |
| Tmem51os1 | n |
| Tmem51    | n |
| Tmem51    | n |
| Tmem51    | y |
| Tmem51os1 | y |
| Tmem51    | y |
| Tmem51os1 | y |
| Tmem51    | y |
| Tmem51os1 | y |
| Tmem51    | y |
| Tmem51os1 | y |
| Tmem51    | y |
| Tmem51os1 | y |
| Tmem51os1 | y |
| Tmem51    | y |
| Tmem51os1 | y |
| Tmem51os1 | n |
| Kazn      | n |
| Lrrc38    | n |
| Oog4      | y |
| Pramef12  | n |
| Pramef12  | n |
| Gm13124   | n |
| Gm13124   | n |
| Dhrs3     | n |
| Vps13d    | n |
| Plod1     | n |
| Clcn6     | y |
| Agtrap    | n |
| Mad2l2    | n |
| Mad2l2    | n |
| Draxin    | n |
| Draxin    | n |

|        |   |
|--------|---|
| Mad2l2 | n |
| Draxin | n |
| Draxin | n |
| Fbxo6  | y |
| Mad2l2 | n |
| Mad2l2 | n |
| Mad2l2 | n |
| Fbxo6  | n |
| Fbxo6  | n |
| Mad2l2 | n |
| Fbxo6  | n |
| Mad2l2 | n |
| Mad2l2 | n |
| Fbxo6  | n |
| Mad2l2 | n |
| Fbxo6  | n |
| Mad2l2 | n |
| Fbxo6  | n |
| Fbxo6  | n |
| Fbxo2  | y |
| Fbxo2  | y |
| Gm572  | n |
| Gm572  | n |
| Casz1  | n |
| Tardbp | n |
| Tardbp | n |
| Casz1  | n |
| Tardbp | n |
| Tardbp | n |
| Casz1  | n |
| Pex14  | n |
| Casz1  | n |
| Casz1  | n |
| Pex14  | n |
| Pex14  | n |
| Casz1  | n |
| Pex14  | n |
| Casz1  | n |



|       |   |
|-------|---|
| Casz1 | n |
| Pex14 | n |
| Pex14 | n |
| Pex14 | n |
| Casz1 | n |
| Pex14 | n |
| Casz1 | n |
| Pex14 | n |
| Casz1 | n |
| Pex14 | n |
| Casz1 | n |
| Pex14 | n |
| Casz1 | n |
| Casz1 | n |

|          |   |
|----------|---|
| Casz1    | n |
| Pex14    | n |
| Pex14    | n |
| Pex14    | n |
| Casz1    | n |
| Pex14    | n |
| Casz1    | n |
| Pex14    | n |
| Casz1    | n |
| Pex14    | n |
| Casz1    | n |
| Casz1    | n |
| Casz1    | n |
| Dffa     | y |
| Cort     | y |
| Nmnat1   | n |
| Ctnnbip1 | n |
| Ctnnbip1 | n |
| Clstn1   | y |
| Clstn1   | y |
| Pik3cd   | y |
| Clstn1   | n |
| Slc25a33 | n |
| Slc25a33 | n |
| Clstn1   | n |

|               |   |
|---------------|---|
| Mir34a        | n |
| Mir34a        | n |
| H6pd          | y |
| Mir34a        | n |
| H6pd          | n |
| H6pd          | n |
| Mir34a        | n |
| H6pd          | n |
| Mir34a        | n |
| Mir34a        | n |
| Gpr157        | n |
| Slc2a5        | n |
| Car6          | n |
| Slc45a1       | n |
| Errfi1        | n |
| Errfi1        | n |
| 1700045H11Rik | n |
| 1700045H11Rik | n |
| Park7         | n |
| Thap3         | n |
| Thap3         | n |
| Thap3         | n |
| Espn          | n |
| Espn          | n |
| Plekhg5       | n |
| Espn          | n |
| Espn          | n |
| Tnfrsf25      | n |
| Espn          | n |
| Tnfrsf25      | n |
| Espn          | n |
| Tnfrsf25      | n |
| Espn          | n |
| Tnfrsf25      | n |
| Tnfrsf25      | n |
| Tnfrsf25      | y |
| Tnfrsf25      | y |
| Espn          | y |

|          |   |
|----------|---|
| Tnfrsf25 | y |
| Tnfrsf25 | y |
| Tnfrsf25 | y |
| Espn     | y |
| Icmt     | y |
| Rnf207   | n |
| Chd5     | n |
| Chd5     | n |
| Nphp4    | n |
| Nphp4    | n |
| Kcnab2   | n |
| Nphp4    | n |
| Nphp4    | n |
| Kcnab2   | n |
| Kcnab2   | n |
| Ajap1    | n |
| Ajap1    | n |
| Lrrc47   | n |
| Smim1    | n |
| Smim1    | y |
| Smim1    | y |
| Megf6    | n |
| Megf6    | n |
| Arhgef16 | n |
| Arhgef16 | n |
| Megf6    | y |
| Prdm16   | n |
| Megf6    | n |
| Megf6    | n |
| Prdm16   | n |
| Megf6    | n |
| Prdm16   | n |
| Megf6    | n |
| Prdm16   | n |
| Megf6    | n |
| Prdm16   | n |
| Prdm16   | n |
| Prdm16   | n |



|        |   |
|--------|---|
| Prdm16 | n |
| Megf6  | n |
| Prdm16 | n |
| Megf6  | n |
| Prdm16 | n |
| Prdm16 | n |
| Megf6  | n |
| Megf6  | n |
| Megf6  | n |
| Prdm16 | n |
| Megf6  | n |
| Prdm16 | n |
| Megf6  | n |
| Megf6  | n |
| Megf6  | n |
| Prdm16 | n |
| Megf6  | n |
| Ttc34  | n |
| Prdm16 | n |
| Ttc34  | n |
| Prdm16 | n |
| Ttc34  | y |
| Prdm16 | y |
| Ttc34  | n |
| Ttc34  | n |
| Ttc34  | n |
| Prdm16 | n |
| Ttc34  | n |
| Prdm16 | n |
| Ttc34  | n |
| Prdm16 | n |

|               |   |
|---------------|---|
| Ttc34         | n |
| Prdm16        | n |
| Ttc34         | n |
| Ttc34         | n |
| Ttc34         | n |
| Prdm16        | n |
| Ttc34         | n |
| Prdm16        | n |
| Ttc34         | n |
| Prdm16        | n |
| Prdm16        | n |
| Ttc34         | n |
| Prdm16        | n |
| Ttc34         | n |
| Prdm16        | n |
| Ttc34         | n |
| Prdm16        | n |
| Prdm16        | n |
| Actrt2        | n |
| Hes5          | n |
| Plch2         | n |
| Plch2         | n |
| Plch2         | n |
| Pank4         | n |
| Plch2         | n |
| Morn1         | n |
| Morn1         | n |
| Rer1          | n |
| Rer1          | n |
| Rer1          | n |
| Ski           | n |
| 2610002J02Rik | n |

|               |   |
|---------------|---|
| Ski           | n |
| Ski           | n |
| Ski           | n |
| Cfap74        | n |
| Cfap74        | n |
| 5830444B04Rik | n |
| Gm16023       | y |
| Mib2          | n |
| Atad3a        | n |
| Tmem240       | n |
| Atad3a        | n |
| Vwa1          | n |
| Atad3aos      | n |
| Vwa1          | n |
| Atad3aos      | n |
| Vwa1          | n |
| Atad3aos      | n |
| Atad3aos      | n |
| Mxra8         | y |
| Tas1r3        | y |
| Tas1r3        | y |
| Tnfrsf18      | n |
| Tnfrsf18      | n |
| Ttll10        | n |
| Ttll10        | n |
| Ttll10        | n |
| Noc2l         | y |
| Klhl17        | y |
| Klhl17        | y |
| Rbm48         | n |
| Rbm48         | n |
| Rbm48         | n |

|               |   |
|---------------|---|
| Rbm48         | n |
| Cdk6          | n |
| Rbm48         | n |
| Mterf1b       | n |
| Fzd1          | n |
| Cldn12        | n |
| Cldn12        | n |
| Steap1        | y |
| 4921511H03Rik | n |
| Nos3          | n |
| Nos3          | y |
| Nos3          | y |
| Kcnh2         | y |
| Nos3          | y |
| Kcnh2         | y |
| Kcnh2         | y |
| Asic3         | y |
| Cdk5          | y |
| Cdk5          | y |
| Slc4a2        | y |
| Cdk5          | y |
| Slc4a2        | y |
| Cdk5          | y |
| Cdk5          | y |
| Cdk5          | y |
| Slc4a2        | y |
| Slc4a2        | y |
| Slc4a2        | y |
| Cdk5          | y |
| Slc4a2        | y |
| Cdk5          | y |
| Slc4a2        | y |
| Cdk5          | y |
| Agap3         | n |
| Agap3         | n |
| Agap3         | n |
| Tmub1         | n |
| Tmub1         | n |

|               |   |
|---------------|---|
| Gbx1          | n |
| Gbx1          | n |
| Gbx1          | n |
| Agap3         | n |
| Gbx1          | n |
| Agap3         | n |
| 4931409K22Rik | n |
| Chpf2         | n |
| Smarcd3       | n |
| Chpf2         | n |
| Chpf2         | n |
| Smarcd3       | n |
| Chpf2         | n |
| Nub1          | y |
| Nub1          | n |
| Nub1          | n |
| Nub1          | n |
| Crygn         | n |
| Nub1          | n |
| Nub1          | n |
| Crygn         | y |
| Crygn         | y |
| Nub1          | n |
| Nub1          | n |
| Nub1          | n |
| Crygn         | n |
| Prkag2os1     | n |
| Prkag2        | n |
| Prkag2        | n |
| 1700096K18Rik | n |
| Gareml        | n |
| Gareml        | n |
| 3110082J24Rik | n |
| 3110082J24Rik | n |
| 3110082J24Rik | n |
| Gareml        | n |
| Gareml        | n |
| Gareml        | n |
| 3110082J24Rik | n |
| Hadha         | n |
| Gareml        | n |

|         |   |
|---------|---|
| Cgref1  | y |
| Abhd1   | y |
| Cad     | n |
| Snx17   | n |
| Zfp513  | n |
| Snx17   | n |
| Snx17   | n |
| Ift172  | n |
| Spon2   | y |
| Fam53a  | n |
| Tacc3   | n |
| Tmem129 | n |
| Tmem129 | n |
| Tacc3   | n |
| Tacc3   | n |
| Tmem129 | n |
| Tmem129 | n |
| Tacc3   | n |
| Tmem129 | n |
| Tacc3   | n |
| Tmem129 | n |
| Letm1   | n |
| Fgfr3   | n |
| Letm1   | n |
| Fgfr3   | y |
| Letm1   | y |
| Fgfr3   | y |
| Fgfr3   | y |
| Letm1   | y |
| Zfyve28 | n |
| Add1    | n |
| Msantd1 | n |
| Lrpap1  | n |
| Msantd1 | n |
| Cpz     | n |
| Acox3   | n |
| Acox3   | n |
| Htra3   | n |

|               |   |
|---------------|---|
| Htra3         | n |
| Acox3         | y |
| Acox3         | y |
| Afap1         | y |
| Afap1         | y |
| Sorcs2        | n |
| Mir7689       | n |
| Msx1          | n |
| 4930487D11Rik | y |
| Hs3st1        | n |
| Cc2d2a        | n |
| Prom1         | y |
| Prom1         | y |
| Cd38          | n |
| Slit2         | n |
| Lgi2          | n |
| 5033403H07Rik | n |
| 5033403H07Rik | n |
| 5033403H07Rik | n |
| Cckar         | y |
| Pcdh7         | n |
| Pcdh7         | n |
| Pcdh7         | n |
| 4932441J04Rik | n |
| Pcdh7         | n |
| 4932441J04Rik | n |
| Pcdh7         | n |
| Arap2         | n |
| 0610040J01Rik | n |
| Rell1         | n |
| Rell1         | n |
| 1700027F09Rik | n |
| 1700027F09Rik | n |
| 1700027F09Rik | n |
| Tbc1d1        | n |
| Klf3          | n |
| Klf3          | n |
| Gm3716        | n |
| Rfc1          | n |
| Ube2k         | n |
| 9130230L23Rik | n |

|               |   |
|---------------|---|
| Nsun7         | n |
| 1700126H18Rik | n |
| Apbb2         | n |
| Apbb2         | n |
| Apbb2         | n |
| Nsun7         | y |
| Apbb2         | y |
| Nsun7         | n |
| Nsun7         | n |
| Nsun7         | n |
| Apbb2         | n |
| Uchl1         | n |
| Limch1        | y |
| Limch1        | n |
| Limch1        | n |
| Bend4         | n |
| C330024D21Rik | y |
| Atp8a1        | n |
| Atp8a1        | y |
| Shisa3        | n |
| Shisa3        | n |
| Ociad2        | n |
| Sgcb          | n |
| Dancr         | n |
| Usp46         | n |
| Dancr         | n |
| Dancr         | n |
| Usp46         | n |
| Usp46         | n |
| Scfd2         | n |
| Rasl11b       | n |
| Rasl11b       | n |
| Scfd2         | n |
| Scfd2         | n |
| Rasl11b       | n |



|               |   |
|---------------|---|
| Scfd2         | n |
| Lnx1          | n |
| Gm6116        | n |
| Gm19583       | n |
| Kdr           | n |
| Kit           | n |
| Kit           | n |
| Kit           | n |
| Kdr           | n |
| Kdr           | n |
| Kdr           | n |
| Srd5a3        | n |
| Kdr           | n |
| Gm7271        | y |
| Aasdh         | n |
| Cep135        | n |
| Hopx          | y |
| Hopx          | y |
| Hopx          | y |
| 1700023E05Rik | n |
| 1700023E05Rik | n |
| 1700023E05Rik | n |
| Hopx          | n |
| Hopx          | n |
| Igfbp7        | n |
| Igfbp7        | n |
| Polr2b        | n |
| Grsf1         | n |
| Ankrd17       | n |
| Rassf6        | y |
| Cxcl3         | n |
| Thap6         | n |
| Rchy1         | n |
| Ppef2         | n |
| Cxcl11        | n |
| Mir6415       | n |
| Scarb2        | y |
| Scarb2        | y |
| Shroom3       | y |
| Ccdc158       | n |
| Shroom3       | n |

|         |   |
|---------|---|
| Shroom3 | n |
| Shroom3 | y |
| Mir1961 | y |
| Mir1961 | y |
| Shroom3 | n |
| Sowahb  | n |
| Gm3259  | n |
| Cnot6l  | n |
| Bmp2k   | n |
| Prdm8   | n |
| Prdm8   | n |
| Prdm8   | n |
| Antxr2  | n |
| Prdm8   | n |
| Antxr2  | n |
| Prdm8   | n |
| Antxr2  | n |
| Prdm8   | n |
| Antxr2  | n |
| Prdm8   | n |
| Antxr2  | n |
| Antxr2  | n |
| Prdm8   | n |
| Antxr2  | n |
| Antxr2  | n |
| Antxr2  | n |
| Prdm8   | n |
| Prdm8   | n |
| Prdm8   | n |
| Antxr2  | n |
| Prdm8   | n |
| Antxr2  | n |
| Prdm8   | n |
| Antxr2  | n |
| Prdm8   | n |
| Prdm8   | n |
| Prdm8   | n |
| Antxr2  | n |
| Prdm8   | n |
| Antxr2  | n |

|               |   |
|---------------|---|
| Antxr2        | n |
| Prdm8         | n |
| Antxr2        | n |
| Prdm8         | n |
| 1700007G11Rik | n |
| Prkg2         | n |
| A930011G23Rik | n |
| Enoph1        | n |
| Tmem150cos    | n |
| Tmem150c      | n |
| Helq          | n |
| Agpat9        | n |
| Cds1          | n |
| Cds1          | n |
| Wdfy3         | n |
| Wdfy3         | n |
| Cds1          | n |
| Arhgap24      | n |
| Mapk10        | n |
| Arhgap24      | y |
| Mapk10        | n |
| Mapk10        | n |
| Mapk10        | n |
| Arhgap24      | n |
| Mapk10        | n |
| Ptpn13        | n |
| Ptpn13        | y |
| Ptpn13        | n |
| Ptpn13        | n |
| 4930429D17Rik | n |
| Ptpn13        | n |
| 4930429D17Rik | n |
| Ptpn13        | n |
| 4930429D17Rik | n |
| Ptpn13        | n |
| 4930429D17Rik | n |
| Ptpn13        | n |
| 4930429D17Rik | n |

|          |   |
|----------|---|
| Aff1     | n |
| Aff1     | n |
| Klhl8    | n |
| Klhl8    | n |
| Klhl8    | n |
| Hsd17b11 | n |
| Lrrc8b   | n |
| Gbp11    | n |
| Zfp326   | n |
| Barhl2   | n |
| Zfp644   | n |
| Hfm1     | n |
| Hfm1     | n |
| Hfm1     | n |
| Tgfbr3   | n |
| Rpap2    | n |
| Rpap2    | n |
| Rpap2    | n |
| Gfi1     | n |
| Rpap2    | n |
| Gfi1     | n |
| Rpap2    | n |
| Gfi1     | n |
| Rpap2    | n |
| Gfi1     | n |
| Rpap2    | n |
| Gfi1     | n |
| Rpap2    | n |
| Gfi1     | n |
| Rpap2    | n |

|         |   |
|---------|---|
| Gfi1    | n |
| Rpap2   | n |
| Gfi1    | n |
| Rpap2   | n |
| Rpap2   | n |
| Rpap2   | n |
| Gfi1    | n |
| Rpap2   | n |
| Gfi1    | n |
| Rpap2   | n |
| Gfi1    | n |
| Rpap2   | n |
| Gfi1    | n |
| Rpap2   | n |
| Gfi1    | n |
| Rpap2   | n |
| Gfi1    | n |
| Rpap2   | n |
| Rpap2   | n |
| Gfi1    | n |
| Rpap2   | n |
| Rpap2   | n |
| Gfi1    | n |
| Rpap2   | n |
| Gfi1    | n |
| Rpap2   | n |
| Gfi1    | n |
| Rpap2   | n |
| Gfi1    | n |
| Rpap2   | n |
| Gfi1    | n |
| Rpap2   | n |
| Gfi1    | n |
| Rpap2   | n |
| Atp5k   | n |
| Mfsd7a  | y |
| Vmn2r17 | n |
| Plcx1   | y |
| Lrcol1  | n |



|               |   |
|---------------|---|
| E130006D01Rik | y |
| Mn1           | y |
| E130006D01Rik | y |
| Mn1           | y |
| E130006D01Rik | y |
| E130006D01Rik | y |
| Mn1           | y |
| E130006D01Rik | y |
| Mn1           | y |
| E130006D01Rik | y |
| Mn1           | y |
| E130006D01Rik | y |
| Mn1           | y |
| E130006D01Rik | y |
| E130006D01Rik | y |
| Mn1           | y |
| E130006D01Rik | y |
| E130006D01Rik | y |
| E130006D01Rik | y |
| Mn1           | y |
| E130006D01Rik | y |
| Mn1           | y |
| Mn1           | y |
| E130006D01Rik | y |

|               |   |
|---------------|---|
| Mn1           | y |
| E130006D01Rik | y |
| Mn1           | y |
| Mn1           | y |
| E130006D01Rik | y |
| Mn1           | y |
| E130006D01Rik | y |
| E130006D01Rik | y |
| E130006D01Rik | y |
| Mn1           | y |
| E130006D01Rik | n |
| E130006D01Rik | n |
| E130006D01Rik | n |
| Mn1           | n |
| E130006D01Rik | n |
| E130006D01Rik | n |
| Mn1           | n |
| Mn1           | n |
| E130006D01Rik | n |
| Mn1           | n |
| E130006D01Rik | n |
| Mn1           | n |
| E130006D01Rik | n |
| E130006D01Rik | n |
| E130006D01Rik | n |
| Mn1           | n |
| Mn1           | n |
| E130006D01Rik | n |
| E130006D01Rik | n |
| E130006D01Rik | n |
| Mn1           | n |
| Mn1           | n |



|               |   |
|---------------|---|
| Mn1           | n |
| E130006D01Rik | n |
| E130006D01Rik | n |
| E130006D01Rik | n |
| Mn1           | n |
| E130006D01Rik | n |
| Mn1           | n |
| E130006D01Rik | n |
| Mn1           | n |
| E130006D01Rik | n |
| C130026L21Rik | n |
| E130006D01Rik | n |
| E130006D01Rik | n |
| C130026L21Rik | n |
| E130006D01Rik | n |
| C130026L21Rik | n |
| E130006D01Rik | n |
| C130026L21Rik | n |
| E130006D01Rik | n |
| C130026L21Rik | n |
| E130006D01Rik | n |
| C130026L21Rik | n |
| E130006D01Rik | n |
| E130006D01Rik | n |
| C130026L21Rik | n |
| E130006D01Rik | n |
| C130026L21Rik | n |
| E130006D01Rik | n |
| E130006D01Rik | n |
| E130006D01Rik | n |
| C130026L21Rik | n |
| C130026L21Rik | n |
| E130006D01Rik | n |
| 1700028D13Rik | n |
| Miat          | n |
| Miat          | n |
| 1700028D13Rik | n |

|               |   |
|---------------|---|
| Cryba4        | n |
| Cryba4        | n |
| Tpst2         | n |
| Hps4          | y |
| Hps4          | y |
| Asphd2        | y |
| Asphd2        | y |
| 1700095B10Rik | n |
| Myo18b        | n |
| Adrbk2        | n |
| Tmem211       | n |
| 2900026A02Rik | n |
| 2900026A02Rik | n |
| Tmem211       | n |
| 2900026A02Rik | y |
| Tmem211       | y |
| 2900026A02Rik | y |
| 2900026A02Rik | y |
| Tmem211       | y |
| 2900026A02Rik | y |
| Tmem211       | n |
| 2900026A02Rik | n |
| 2900026A02Rik | n |
| Tmem211       | n |
| Mir7230       | n |
| Aym1          | n |
| Aym1          | n |
| Wscd2         | n |
| Wscd2         | n |
| Wscd2         | n |
| Cmklr1        | n |
| Wscd2         | n |
| Cmklr1        | n |
| Wscd2         | n |
| Cmklr1        | n |
| Wscd2         | y |

|          |   |
|----------|---|
| Iscu     | n |
| Ssh1     | n |
| Dao      | n |
| Dao      | n |
| Dao      | n |
| Ssh1     | n |
| Ssh1     | n |
| Alkbh2   | n |
| Alkbh2   | n |
| Ung      | n |
| Foxn4    | n |
| Myo1h    | n |
| Myo1h    | n |
| Fam222a  | n |
| Fam222a  | n |
| Trpv4    | n |
| Fam222a  | y |
| Trpv4    | y |
| Fam222a  | y |
| Trpv4    | y |
| Gltf     | y |
| Ankrd13a | n |
| Spp13    | n |
| Spp13    | n |
| Hnf1a    | n |
| Mlec     | y |
| Mlec     | y |
| Mlec     | y |
| Pop5     | n |
| Cabp1    | n |
| Pop5     | n |
| Cabp1    | n |
| Pop5     | y |
| Cabp1    | n |
| Rnf10    | n |
| Pop5     | n |
| Rnf10    | n |
| Rnf10    | n |

|         |   |
|---------|---|
| Pop5    | y |
| Rnf10   | y |
| Rnf10   | y |
| Rnf10   | y |
| Dynll1  | y |
| Msi1    | n |
| Msi1    | n |
| Cox6a1  | n |
| Cox6a1  | n |
| Sirt4   | n |
| Pla2g1b | n |
| Sirt4   | n |
| Pla2g1b | n |
| Pla2g1b | n |
| Pla2g1b | n |
| Sirt4   | n |
| Sirt4   | y |
| Sirt4   | y |
| Pxn     | n |
| Sirt4   | n |
| Sirt4   | n |
| Sirt4   | n |
| Pxn     | n |
| Pxn     | n |
| Sirt4   | n |
| Pxn     | n |
| Pxn     | n |
| Sirt4   | n |
| Sirt4   | n |
| Sirt4   | n |
| Pxn     | n |
| Pxn     | n |
| Sirt4   | n |
| Cit     | n |
| Cit     | n |
| Cit     | n |
| Prkab1  | n |
| Cit     | n |

|               |   |
|---------------|---|
| Prkab1        | n |
| Cit           | y |
| Srrm4os       | n |
| Hspb8         | n |
| Srrm4         | n |
| Suds3         | y |
| Taok3         | n |
| Taok3         | n |
| Taok3         | n |
| Pebp1         | n |
| Vsig10        | n |
| Vsig10        | n |
| Rfc5          | y |
| Fbxo21        | n |
| Fbxw8         | n |
| Fbxw8         | n |
| Fbxw8         | n |
| Rnft2         | n |
| 2410131K14Rik | n |
| 2410131K14Rik | n |
| 2410131K14Rik | n |
| Rnft2         | n |
| 2410131K14Rik | n |
| 2410131K14Rik | n |
| Rnft2         | n |
| 2410131K14Rik | n |
| Rnft2         | n |
| Med13l        | n |
| Med13l        | n |
| Med13l        | n |
| Rnft2         | n |
| Med13l        | n |
| Med13l        | n |
| Med13l        | n |
| Rnft2         | n |
| Med13l        | n |
| Rnft2         | n |
| Rnft2         | n |
| Rnft2         | n |
| Med13l        | n |
| Rnft2         | n |

|               |   |
|---------------|---|
| Rnft2         | n |
| Rnft2         | n |
| Rnft2         | n |
| Med13l        | n |
| Rnft2         | n |
| Med13l        | n |
| Rnft2         | n |
| Rnft2         | n |
| Med13l        | n |
| Rnft2         | n |
| Med13l        | n |
| Rnft2         | n |
| Med13l        | n |
| Med13l        | n |
| Rnft2         | n |
| Med13l        | n |
| Gm7538        | n |
| 1700081H04Rik | n |
| Gm16063       | n |
| AW549542      | n |
| AW549542      | n |
| Gm16063       | n |
| Gm16063       | n |
| Tbx3os2       | n |
| Gm16063       | n |
| Tbx3os2       | n |
| Tbx3os2       | n |
| Tbx3          | n |
| Tbx3          | y |
| Tbx3os2       | n |
| Rbm19         | n |
| Gm10390       | n |
| Rbm19         | n |
| Rbm19         | n |

|         |   |
|---------|---|
| Rbm19   | n |
| Rbm19   | n |
| Rbm19   | n |
| Gm10390 | n |
| Gm10390 | n |
| Gm10390 | n |
| Rbm19   | n |
| Rbm19   | n |
| Sds     | n |
| Sds     | n |
| Sds     | n |
| Sdsl    | n |
| Sdsl    | n |
| Sds     | y |
| Sdsl    | y |
| Sds     | y |
| Sdsl    | y |
| Sds     | y |
| Sds     | y |
| lqcd    | n |
| Tpcn1   | n |
| lqcd    | n |
| lqcd    | y |
| Tpcn1   | y |
| lqcd    | n |
| Rita1   | n |
| lqcd    | n |
| lqcd    | n |
| Dtx1    | n |
| Dtx1    | n |
| Naa25   | n |
| Tmem116 | n |
| Erp29   | n |
| Erp29   | n |
| Fam109a | n |
| Myl2    | y |
| Myl2    | n |
| Ppp1cc  | n |
| Pptc7   | n |
| Rad9b   | n |
| P2rx7   | y |

|               |   |
|---------------|---|
| Camkk2        | n |
| Camkk2        | n |
| P2rx4         | n |
| Camkk2        | n |
| Camkk2        | n |
| Camkk2        | n |
| Kdm2b         | n |
| A930024E05Rik | n |
| A930024E05Rik | n |
| Kdm2b         | n |
| Kdm2b         | n |
| Tmem120b      | n |
| Tmem120b      | n |
| Morn3         | n |
| Morn3         | y |
| Rhof          | n |
| Rhof          | y |
| Setd1b        | n |
| Hpd           | n |
| Il31          | n |
| Lrrc43        | y |
| Lrrc43        | n |
| Clip1         | n |
| Clip1         | n |
| Kntc1         | n |
| Abcb9         | n |
| Arl6ip4       | n |
| Pitpnm2       | n |
| Pitpnm2       | n |
| Pitpnm2       | n |
| Pitpnm2os1    | n |
| Pitpnm2os1    | n |
| Pitpnm2       | n |
| Pitpnm2       | n |
| Pitpnm2os1    | n |
| Pitpnm2os1    | n |
| Pitpnm2       | n |
| Pitpnm2os1    | n |
| Pitpnm2os1    | n |
| Pitpnm2       | n |
| Pitpnm2os1    | n |
| Pitpnm2       | n |
| Pitpnm2os1    | n |



|            |   |
|------------|---|
| Pitpnm2    | n |
| Pitpnm2os1 | n |
| Pitpnm2    | n |
| Pitpnm2os1 | n |
| Pitpnm2    | n |
| Rilpl1     | n |
| Rilpl1     | y |
| Rilpl1     | y |
| Tmed2      | y |
| Tctn2      | n |
| Eif2b1     | n |
| Ccdc92     | y |
| Fam101a    | n |
| Ncor2      | n |
| Ncor2      | n |
| Fam101a    | n |
| Ncor2      | n |
| Fam101a    | n |
| Fam101a    | n |
| Fam101a    | n |
| Ncor2      | n |
| Ncor2      | n |
| Fam101a    | n |
| Ncor2      | n |
| Bri3bp     | n |
| Bri3bp     | n |
| Dhx37      | n |
| Bri3bp     | n |
| Dhx37      | n |
| Bri3bp     | n |
| Dhx37      | n |
| Bri3bp     | n |
| Dhx37      | n |
| Dhx37      | n |
| Bri3bp     | n |

|          |   |
|----------|---|
| Bri3bp   | n |
| Dhx37    | n |
| Tmem132b | n |
| Tmem132b | n |
| Fzd10    | n |
| Piwil1   | n |
| Ran      | n |
| Stx2     | n |
| Ran      | n |
| Stx2     | n |
| Ran      | n |
| Stx2     | n |
| Gpr133   | n |
| Stx2     | n |
| Stx2     | n |
| Stx2     | n |
| Mrps17   | y |
| Chchd2   | y |
| Zbed5    | y |
| Vkorc1l1 | n |
| Gtf2ird2 | n |
| Gtf2ird2 | n |
| Ncf1     | n |
| Gtf2ird2 | n |
| Ncf1     | n |
| Gtf2ird2 | n |
| Ncf1     | n |
| Ncf1     | n |
| Gtf2ird2 | n |
| Gtf2ird1 | n |
| Rfc2     | n |
| Rfc2     | n |
| Eln      | n |
| Rfc2     | n |



|          |   |
|----------|---|
| Dnajc30  | n |
| Mlxipl   | n |
| Vps37d   | n |
| Fzd9     | y |
| Fzd9     | y |
| Baz1b    | n |
| Baz1b    | n |
| Fzd9     | n |
| Fzd9     | n |
| Baz1b    | n |
| Baz1b    | n |
| Fkbp6    | n |
| Baz1b    | n |
| Fkbp6    | n |
| Baz1b    | n |
| Fkbp6    | n |
| Baz1b    | n |
| Fkbp6    | n |
| Baz1b    | n |
| Fkbp6    | n |
| Baz1b    | n |
| Fkbp6    | n |
| Pom121   | n |
| Nsun5    | n |
| Nsun5    | n |
| Hip1     | n |
| Tmem120a | n |
| Por      | n |

|         |   |
|---------|---|
| Por     | n |
| Srrm3   | n |
| Ywhag   | n |
| Ywhag   | n |
| Hspb1   | n |
| Zp3     | n |
| Dtx2    | n |
| Dtx2    | n |
| Lrwd1   | n |
| Alkbh4  | n |
| Myl10   | n |
| Cux1    | n |
| Myl10   | n |
| Myl10   | n |
| Cux1    | n |
| Cux1    | n |
| Myl10   | n |
| Cux1    | n |
| Myl10   | n |
| Myl10   | n |
| Cux1    | n |
| Myl10   | n |
| Col26a1 | n |
| Znhit1  | y |
| Znhit1  | y |
| Trim56  | n |
| Ache    | n |
| Ufsp1   | y |
| Ufsp1   | y |
| Slc12a9 | y |
| Slc12a9 | y |
| Slc12a9 | n |
| Slc12a9 | n |
| Slc12a9 | n |
| Ephb4   | n |
| Ephb4   | n |
| Slc12a9 | n |
| Epo     | y |
| Epo     | y |
| Mospd3  | n |
| Mospd3  | n |

|               |   |
|---------------|---|
| Tfr2          | n |
| Pcolce        | n |
| Tfr2          | n |
| Pcolce        | n |
| Tfr2          | n |
| Pcolce        | n |
| Pcolce        | n |
| Lrch4         | n |
| Lrch4         | n |
| Lrch4         | n |
| Pcolce        | n |
| Pcolce        | n |
| Lrch4         | n |
| Pcolce        | n |
| Lrch4         | n |
| Pcolce        | n |
| Lrch4         | n |
| Pcolce        | n |
| Lrch4         | n |
| Pcolce        | n |
| Pcolce        | n |
| Fbxo24        | n |
| Lrch4         | y |
| Irs3          | y |
| Lrch4         | y |
| Irs3          | y |
| Irs3          | y |
| Irs3          | y |
| Gm20605       | y |
| Irs3          | y |
| Nyap1         | y |
| 6330418K02Rik | y |
| Gal3st4       | y |
| 6330418K02Rik | y |
| 6330418K02Rik | y |
| Gal3st4       | y |
| Gm5294        | y |
| Pdgfa         | y |
| Pdgfa         | y |
| Gm5294        | n |

|               |   |
|---------------|---|
| Pdgfa         | n |
| Dnaaf5        | n |
| Dnaaf5        | n |
| Prkar1b       | n |
| Prkar1b       | n |
| Dnaaf5        | n |
| Cyp2w1        | n |
| Cyp2w1        | n |
| Cyp2w1        | n |
| 3110082I17Rik | y |
| C130050O18Rik | n |
| 4930500L23Rik | n |
| Zfand2a       | n |
| Uncx          | n |
| Micall2       | n |
| Mafk          | n |
| Psmg3         | n |
| Mad1l1        | n |
| Grifin        | n |
| Grifin        | n |
| Chst12        | n |
| Grifin        | n |
| Grifin        | n |
| Chst12        | n |
| Grifin        | n |
| Grifin        | n |
| Lfng          | y |
| Lfng          | y |
| Ttyh3         | y |
| Ttyh3         | y |
| lqce          | y |
| Amz1          | n |
| Amz1          | n |
| Card11        | n |

|         |   |
|---------|---|
| Card11  | n |
| Foxk1   | n |
| Foxk1   | n |
| Radil   | n |
| Radil   | n |
| Foxk1   | n |
| Foxk1   | n |
| Foxk1   | n |
| Radil   | n |
| Radil   | n |
| Radil   | n |
| Papolb  | y |
| Slc29a4 | n |
| Slc29a4 | n |
| Tnrc18  | n |
| Tnrc18  | n |
| Slc29a4 | n |
| Tnrc18  | n |
| Slc29a4 | n |
| Slc29a4 | n |
| Tnrc18  | n |
| Slc29a4 | n |
| Slc29a4 | n |
| Tnrc18  | n |
| Fscn1   | n |
| Actb    | n |
| Actb    | n |
| Fscn1   | n |
| Fscn1   | n |
| Actb    | n |
| Fscn1   | n |
| Rnf216  | n |
| Fscn1   | n |
| Rnf216  | n |
| Fscn1   | n |
| Zfp12   | n |
| Zfp12   | n |
| Grid2ip | y |



|          |   |
|----------|---|
| Daglb    | n |
| Cyth3    | n |
| Cyth3    | n |
| Pms2     | n |
| Ccz1     | n |
| Ccz1     | n |
| Lmtk2    | y |
| Ocm      | y |
| Baiap2l1 | n |
| Baiap2l1 | n |
| Bri3     | n |
| Tmem130  | n |
| Tmem130  | n |
| Tmem130  | n |
| Cyp3a41a | n |
| Mtif3    | n |
| Rasl11a  | n |
| Lnx2     | n |
| Gsx1     | n |
| Pdx1     | n |
| Pdx1     | n |
| Pan3     | n |
| Pan3     | n |
| Flt1     | n |
| Flt1     | n |
| Pan3     | n |
| Flt1     | n |
| Pan3     | n |
| Pan3     | n |
| Flt1     | n |
| Flt1     | n |
| Flt1     | n |
| Pomp     | y |
| Slc46a3  | n |
| Slc46a3  | n |
| Mtus2    | n |

|               |   |
|---------------|---|
| Ubl3          | n |
| Katnal1       | n |
| Katnal1       | n |
| 2210417A02Rik | n |
| Katnal1       | n |
| 8430423G03Rik | n |
| 8430423G03Rik | n |
| 8430423G03Rik | n |
| Katnal1       | n |
| Katnal1       | n |
| Katnal1       | n |
| 8430423G03Rik | n |
| 5930430L01Rik | n |
| 5930430L01Rik | n |
| 5930430L01Rik | n |
| Hmgb1         | n |
| Gm15408       | n |
| Hmgb1         | n |
| 5730422E09Rik | n |
| 5730422E09Rik | n |
| Medag         | n |
| Gm15997       | n |
| Gm15997       | n |
| Medag         | y |
| Tex26         | n |
| Gm15997       | n |
| Fry           | y |
| Fry           | y |
| Fry           | y |
| Gm5           | y |
| Gm5           | y |
| Gm5           | y |
| Samd9l        | n |
| Calcr         | n |
| Sgce          | y |
| Sgce          | n |
| Ppp1r9a       | n |
| Pon1          | n |

|               |   |
|---------------|---|
| Pon2          | n |
| 1700019G24Rik | n |
| Ica1          | n |
| Gm6578        | n |
| 1700016P04Rik | n |
| Ppp1r3a       | n |
| Tes           | n |
| Met           | n |
| Wnt2          | n |
| Ctnbp2        | y |
| Kcnd2         | n |
| Tspan12       | n |
| Tspan12       | y |
| Grm8          | y |
| Gcc1          | y |
| Lrrc4         | y |
| Mir129-1      | n |
| Rbm28         | n |
| Hilpda        | y |
| Opn1sw        | y |
| Ccdc136       | y |
| Ccdc136       | y |
| Opn1sw        | y |
| Ccdc136       | y |
| Opn1sw        | y |
| Ccdc136       | y |
| Ccdc136       | y |
| Opn1sw        | y |
| Tnpo3         | n |
| Nrf1          | n |
| Nrf1          | n |
| Mirc35hg      | n |
| Ube2h         | n |
| BB283400      | n |
| Cpa2          | n |
| Tmem209       | n |

|               |   |
|---------------|---|
| Cpa2          | n |
| Cpa1          | n |
| Cpa1          | n |
| Cep41         | n |
| Copg2         | y |
| 2210408F21Rik | n |
| Lincpint      | n |
| Podxl         | y |
| Podxl         | y |
| Podxl         | y |
| Podxl         | n |
| Podxl         | n |
| 1700012A03Rik | n |
| Plxna4        | n |
| Chchd3        | n |
| Lrguk         | n |
| Lrguk         | n |
| Akr1b3        | y |
| 3110062M04Rik | n |
| 2010107G12Rik | n |
| Nup205        | n |
| Creb3l2       | n |
| Creb3l2       | n |
| Creb3l2       | n |
| Akr1d1        | n |
| Akr1d1        | n |
| Creb3l2       | n |
| Akr1d1        | n |
| Tbxas1        | n |
| 1700025N23Rik | n |
| Kdm7a         | n |
| Rab19         | n |
| Tmem139       | y |
| Fam131b       | y |
| Clcn1         | y |
| Nobox         | n |
| Ezh2          | n |
| Zfp467        | y |

|               |   |
|---------------|---|
| Zfp862-ps     | n |
| Rarres2       | y |
| Gimap1        | n |
| Gimap3        | n |
| Gimap1        | n |
| Gimap3        | n |
| Gimap3        | n |
| Ccdc126       | n |
| Stk31         | y |
| Npy           | n |
| Npy           | n |
| Npy           | n |
| Osbp13        | n |
| C530044C16Rik | n |
| Npvf          | n |
| Hnrnpa2b1     | n |
| Hnrnpa2b1     | n |
| Hnrnpa2b1     | n |
| Halr1         | n |
| Skap2         | n |
| Halr1         | n |
| Hoxa2         | n |
| Hoxa2         | n |
| Hoxa2         | y |
| Hoxaas3       | y |
| Hoxa2         | y |
| Hoxaas3       | y |
| Hoxa2         | y |
| Hoxa3         | n |
| Hoxa3         | n |
| Hoxaas3       | n |
| Hoxaas3       | n |
| Hoxa3         | n |
| Hoxaas3       | n |
| Hoxa3         | n |
| Hoxaas3       | n |
| Hoxaas3       | n |
| Hoxa3         | n |
| Hoxaas3       | n |
| Hoxa3         | n |
| Hoxaas3       | n |

|         |   |
|---------|---|
| Hoxa3   | n |
| Hoxaas3 | n |
| Hoxa3   | n |
| Hoxa3   | n |
| Hoxaas3 | n |
| Hoxa3   | n |
| Hoxaas3 | n |
| Hoxa3   | n |
| Hoxaas3 | n |
| Hoxa3   | n |
| Hoxaas3 | n |
| Hoxaas3 | n |
| Hoxa3   | n |
| Hoxaas3 | n |
| Hoxa3   | n |
| Hoxaas3 | n |
| Hoxa3   | n |
| Hoxaas3 | n |
| Hoxaas3 | n |
| Hoxaas3 | n |
| Hoxa3   | n |
| Hoxa3   | n |
| Hoxa3   | n |
| Hoxa4   | y |
| Hoxaas3 | y |
| Hoxaas3 | y |









|               |   |
|---------------|---|
| Nod1          | n |
| Znrf2         | n |
| Fam188b       | n |
| Inmt          | n |
| Inmt          | n |
| Neurod6       | n |
| Abcg2         | n |
| Herc3         | y |
| Herc3         | n |
| Smarcad1      | n |
| Ndnf          | y |
| Gng12         | n |
| Gadd45a       | n |
| E230016M11Rik | n |
| E230016M11Rik | n |
| Gadd45a       | n |
| Gadd45a       | n |
| E230016M11Rik | n |
| Rprl1         | n |
| Eif2ak3       | n |
| Tex37         | n |
| Foxi3         | n |
| Tex37         | n |
| Reep1         | n |
| Polr1a        | n |
| Polr1a        | n |
| 9130221F21Rik | n |
| 9130221F21Rik | n |
| 4933431G14Rik | n |
| Usp39         | n |
| 0610030E20Rik | n |
| Tcf7l1        | n |
| Tcf7l1        | n |
| Gm15401       | n |
| Gm15401       | n |
| Tcf7l1        | n |
| Tcf7l1        | n |
| Gm15401       | n |

|               |   |
|---------------|---|
| Gm15401       | y |
| Gm15401       | y |
| Kcmf1         | n |
| Dnah6         | n |
| Dnah6         | n |
| Mrpl19        | n |
| Mrpl19        | n |
| Eva1a         | n |
| Mrpl19        | n |
| Mrpl19        | n |
| Tacr1         | n |
| Dok1          | n |
| Dok1          | n |
| Htra2         | n |
| Tlx2          | y |
| Rtkn          | y |
| Rtkn          | y |
| 1700003E16Rik | n |
| 1700003E16Rik | n |
| Wdr54         | n |
| 1700003E16Rik | n |
| Dctn1         | y |
| Slc4a5        | n |
| Tet3          | y |
| Dguok         | n |
| Stambp        | n |
| Dysf          | n |
| Paip2b        | n |
| Paip2b        | n |
| Noto          | y |
| Noto          | y |
| Pradc1        | y |
| Dusp11        | n |
| Tgfa          | n |
| Tgfa          | n |
| Asprv1        | y |
| Mxd1          | y |
| Asprv1        | y |
| Mxd1          | n |
| Mxd1          | n |
| Anxa4         | n |

|         |   |
|---------|---|
| Bmp10   | n |
| Efcc1   | n |
| Cnbp    | n |
| Gm5577  | n |
| Rab7    | n |
| Mir6376 | n |
| Rpn1    | n |
| Rpn1    | n |
| Mir6376 | n |
| Mir6376 | n |
| Rpn1    | n |
| Rpn1    | n |
| Rpn1    | n |
| Gata2   | n |
| Eefsec  | n |
| Gata2   | n |
| Eefsec  | n |
| Eefsec  | n |
| Gata2   | n |
| Gata2   | n |
| Eefsec  | n |
| Gata2   | n |
| Eefsec  | n |
| Eefsec  | n |
| Gata2   | n |
| Gata2   | n |
| Eefsec  | n |

|        |   |
|--------|---|
| Gata2  | n |
| Eefsec | n |
| Gata2  | y |
| Eefsec | y |
| Gata2  | n |
| Eefsec | n |
| Gata2  | n |
| Gata2  | n |
| Dnajb8 | n |
| Eefsec | n |
| Eefsec | n |
| Dnajb8 | n |
| Dnajb8 | n |
| Dnajb8 | n |
| Eefsec | n |
| Eefsec | n |
| Dnajb8 | n |
| Dnajb8 | n |
| Eefsec | n |
| Dnajb8 | n |
| Eefsec | n |
| Dnajb8 | n |
| Dnajb8 | n |
| Eefsec | n |
| Eefsec | n |
| Dnajb8 | n |
| Eefsec | n |
| Dnajb8 | n |
| Eefsec | n |
| Dnajb8 | n |
| Dnajb8 | n |
| Eefsec | n |
| Ruvbl1 | n |
| Mcm2   | n |
| Plxna1 | n |
| Gm1965 | n |

|               |   |
|---------------|---|
| Gm1965        | n |
| Aldh1l1       | n |
| Iqsec1        | y |
| Iqsec1        | n |
| Iqsec1        | n |
| Nup210        | n |
| Lsm3          | n |
| Slc6a6        | n |
| Grip2         | n |
| Slc6a6        | n |
| Grip2         | n |
| Grip2         | n |
| Grip2         | y |
| 4930590J08Rik | n |
| 4930590J08Rik | n |
| Nr2c2         | n |
| Adamts9       | n |
| 9530026P05Rik | n |
| 9530026P05Rik | n |
| Slc25a26      | n |
| Magi1         | n |
| Slc25a26      | n |
| Lrig1         | n |
| Slc25a26      | n |
| Mir1957a      | n |
| Fam19a1       | n |
| Arl6ip5       | n |
| Arl6ip5       | n |
| Eogt          | n |
| Tmf1          | n |
| Arl6ip5       | n |
| Lmod3         | y |
| Arl6ip5       | n |
| Arl6ip5       | n |
| Frmd4b        | n |

|               |   |
|---------------|---|
| Frmd4b        | n |
| Mitf          | n |
| Mitf          | n |
| Gpr27         | y |
| Gpr27         | y |
| Foxp1         | y |
| Foxp1         | n |
| Foxp1         | n |
| Foxp1         | n |
| Gpr27         | n |
| Gpr27         | n |
| Foxp1         | n |
| Gpr27         | n |
| Gpr27         | n |
| Foxp1         | n |
| Gpr27         | n |
| Gpr27         | n |
| Foxp1         | n |
| Prok2         | n |
| 1700049E22Rik | n |
| Rybp          | n |
| 1700049E22Rik | n |
| Rybp          | n |
| 1700049E22Rik | n |
| Shq1          | n |
| Shq1          | n |
| Pdzrn3        | y |
| Gm9871        | n |
| Itpr1         | n |
| Itpr1         | n |
| 0610040F04Rik | n |
| 0610040F04Rik | n |
| 0610040F04Rik | n |
| Itpr1         | n |
| 0610040F04Rik | n |
| 0610040F04Rik | n |
| 0610040F04Rik | n |
| Thumpd3       | n |
| Lhfpl4        | n |
| Rpusd3        | n |
| Il17re        | y |

|        |   |
|--------|---|
| Prpt3  | y |
| Creld1 | y |
| Irak2  | n |
| Ghrl   | n |
| Irak2  | n |
| Ghrl   | n |
| Irak2  | n |
| Atp2b2 | n |
| Atp2b2 | n |
| Atg7   | n |
| Vgll4  | n |
| Atg7   | n |
| Vgll4  | n |
| Atg7   | n |
| Vgll4  | n |
| Atg7   | n |
| Vgll4  | n |
| Vgll4  | n |
| Tsen2  | n |
| Mkrn2  | n |
| Cand2  | n |
| Cand2  | n |



|          |   |
|----------|---|
| Tmem40   | n |
| Tmem40   | n |
| Rpl32    | n |
| Ift122   | n |
| H1foo    | n |
| H1foo    | n |
| Plxnd1   | n |
| Plxnd1   | y |
| Plxnd1   | y |
| Plxnd1   | n |
| H1foo    | n |
| H1foo    | n |
| Plxnd1   | n |
| H1foo    | n |
| Fam21    | n |
| Fam21    | n |
| Tmem72   | n |
| Fxyd4    | n |
| Lrtm2    | n |
| Lrtm2    | y |
| Adipor2  | n |
| Adipor2  | n |
| Wnt5b    | y |
| Wnt5b    | n |
| Wnt5b    | n |
| Ninj2    | n |
| Ninj2    | n |
| B4galnt3 | n |
| Ninj2    | n |
| B4galnt3 | n |
| Ninj2    | n |
| B4galnt3 | n |
| B4galnt3 | n |
| Ninj2    | n |
| Ninj2    | n |
| Il17ra   | y |
| Il17ra   | y |
| Il17ra   | y |
| Il17ra   | n |
| Il17ra   | y |
| Il17ra   | y |

|         |   |
|---------|---|
| Cecr5   | n |
| Mical3  | n |
| Pex26   | n |
| Iqsec3  | y |
| Dppa3   | n |
| Apobec1 | n |
| Gdf3    | y |
| Dppa3   | n |
| Gdf3    | n |
| Dppa3   | n |
| Gdf3    | n |
| Gdf3    | n |
| Dppa3   | n |
| Dppa3   | n |
| Gdf3    | n |
| Gdf3    | n |
| Gdf3    | n |
| Slc2a3  | y |
| Slc2a3  | y |
| Foxj2   | n |
| C3ar1   | y |
| Phb2    | n |
| Lrrc23  | y |
| Lrrc23  | y |
| Cdca3   | y |
| Gpr162  | y |
| Gpr162  | y |
| Gpr162  | y |
| Cdca3   | y |
| Gpr162  | y |
| Cdca3   | y |
| Gpr162  | y |
| Gpr162  | y |
| Cdca3   | y |
| Gpr162  | y |

|               |   |
|---------------|---|
| Cdca3         | y |
| Cdca3         | y |
| Mlf2          | n |
| Mlf2          | n |
| Lag3          | n |
| Mlf2          | n |
| Lag3          | n |
| Lag3          | n |
| Mlf2          | n |
| Ptms          | n |
| Ptms          | n |
| Mlf2          | n |
| Ptms          | n |
| Mlf2          | n |
| Cops7a        | n |
| Gapdh         | n |
| Gapdh         | n |
| Lpar5         | n |
| Gapdh         | n |
| Gapdh         | n |
| Scnn1a        | y |
| Scnn1a        | y |
| Scnn1a        | y |
| Ltbr          | y |
| Ltbr          | y |
| Ltbr          | y |
| Scnn1a        | y |
| Scnn1a        | y |
| Ltbr          | y |
| Ltbr          | y |
| Scnn1a        | n |
| Cd9           | n |
| Vwf           | n |
| Cd9           | n |
| Ano2          | n |
| Kcna5         | y |
| Ndufa9        | n |
| Dyrk4         | y |
| Dyrk4         | y |
| D6Wsu163e     | y |
| 9330179D12Rik | n |

|               |   |
|---------------|---|
| 9330179D12Rik | n |
| D130058E03    | n |
| D130058E03    | n |
| D130058E03    | n |
| Parp11        | n |
| Parp11        | n |
| D130058E03    | n |
| D130058E03    | n |
| Cracr2a       | n |
| Tspan11       | n |
| Tspan11       | n |
| Tspan9        | n |
| Tspan11       | n |
| Tspan11       | n |
| Tspan11       | n |
| Tspan9        | n |
| Foxm1         | n |
| Tead4         | n |
| Tead4         | n |
| Foxm1         | n |
| Foxm1         | y |
| Nrip2         | y |
| Nrip2         | y |
| Nrip2         | y |
| Pzp           | n |
| Clec2h        | n |
| Tas2r120      | n |
| Etv6          | n |
| Kap           | n |
| Kap           | n |
| Etv6          | n |
| Lrp6          | n |
| Etv6          | n |
| Bcl2l14       | n |
| Gpr19         | y |

|               |   |
|---------------|---|
| Gprc5a        | n |
| Hebp1         | n |
| E330021D16Rik | n |
| Atf7ip        | n |
| E330021D16Rik | n |
| Atf7ip        | n |
| E330021D16Rik | n |
| H2afj         | y |
| Pde6h         | n |
| Pde6h         | n |
| Ptpro         | n |
| Ptpro         | n |
| Rerg          | n |
| Rerg          | n |
| Plekha5       | n |
| Aebp2         | n |
| Plcz1         | n |
| Plcz1         | n |
| Aebp2         | n |
| Plcz1         | n |
| Aebp2         | n |
| Plcz1         | n |
| Plcz1         | n |
| Slco1a4       | y |
| B230216G23Rik | n |
| B230216G23Rik | n |
| Abcc9         | n |
| St8sia1       | y |
| Gm7457        | y |
| C2cd5         | n |
| D6Ertd474e    | n |
| Sox5          | n |
| Sox5os3       | n |
| Bcat1         | n |
| Bcat1         | n |
| Bcat1         | n |
| Tuba3b        | n |
| Rassf8        | n |
| Bhlhe41       | n |
| Rassf8        | n |
| Bhlhe41       | n |

|               |   |
|---------------|---|
| Rassf8        | n |
| Fgfr1op2      | n |
| Rps4l         | n |
| Tmtc1         | n |
| Rps4l         | n |
| Tmtc1         | n |
| Tmtc1         | n |
| Rps4l         | n |
| Tmtc1         | n |
| Rps4l         | n |
| Rps4l         | n |
| Rps4l         | n |
| Mettl20       | n |
| Mettl20       | n |
| Mettl20       | n |
| Amn1          | n |
| Amn1          | n |
| Mir290a       | n |
| Mir290b       | n |
| Mir290a       | n |
| Mir292b       | n |
| Mir292b       | n |
| Prkcg         | y |
| Prkcg         | y |
| Cacng8        | n |
| 3300002P13Rik | n |
| Cacng6        | y |
| 3300002P13Rik | y |

|               |   |
|---------------|---|
| Brsk1         | n |
| Suv420h2      | y |
| Il11          | y |
| Isoc2a        | y |
| Isoc2a        | y |
| Zfp579        | n |
| Zfp580        | n |
| Trim28        | n |
| Trim28        | n |
| Trim28        | n |
| Mzf1          | n |
| Trim28        | n |
| Mzf1          | n |
| Mzf1          | n |
| Lig1          | n |
| Lig1          | n |
| 6330408A02Rik | n |
| 6330408A02Rik | n |
| 6330408A02Rik | n |
| Lig1          | n |
| Lig1          | n |
| Lig1          | n |
| Obox1         | n |
| Meis3         | n |
| Bbc3          | n |
| Ccdc9         | n |
| Zc3h4         | n |
| Npas1         | n |
| Fkrp          | n |
| Dact3         | n |
| Psg16         | y |
| Psg-ps1       | n |
| Pglyrp1       | n |
| Mypop         | n |
| Irf2bp1       | y |
| Irf2bp1       | y |
| Foxa3         | y |
| Foxa3         | y |
| Irf2bp1       | y |
| Irf2bp1       | n |
| Irf2bp1       | n |

|          |   |
|----------|---|
| Foxa3    | n |
| Sympk    | y |
| Sympk    | y |
| Sympk    | y |
| Foxa3    | y |
| Sympk    | y |
| Sympk    | y |
| Foxa3    | y |
| Foxa3    | y |
| Dmpk     | n |
| Dmpk     | n |
| Qpctl    | n |
| Dmpk     | n |
| Qpctl    | n |
| Qpctl    | n |
| Qpctl    | y |
| Rtn2     | y |
| Rtn2     | y |
| Rtn2     | y |
| Fosb     | n |
| Ppp1r13l | n |
| Ckm      | n |
| Mark4    | n |
| Mark4    | n |
| Ckm      | n |
| Mark4    | n |
| Ckm      | n |
| Ckm      | n |
| Trappc6a | y |
| Trappc6a | y |
| Trappc6a | y |
| Zfp296   | n |
| Relb     | n |



|         |   |
|---------|---|
| Zfp296  | n |
| Relb    | n |
| Zfp296  | n |
| Relb    | n |
| Tomm40  | n |
| Zfp296  | n |
| Cblc    | n |
| Gm19345 | y |
| Gm19345 | y |
| Gm19345 | y |
| Cblc    | y |
| Gm19345 | y |
| Gm19345 | y |
| Gm19345 | n |
| Gm19345 | n |
| Bcl3    | n |
| Gm19345 | n |
| Bcl3    | n |
| Gm19345 | n |
| Bcl3    | n |
| Gm19345 | n |
| Bcl3    | n |
| Gm19345 | n |
| Bcl3    | n |
| Gm19345 | n |
| Gm19345 | n |
| Gm19345 | n |
| Bcl3    | n |



|         |   |
|---------|---|
| Tesc1   | n |
| Tesc1   | n |
| Kcnn4   | n |
| Tesc1   | n |
| Kcnn4   | n |
| Tesc1   | n |
| Kcnn4   | n |
| Irgc1   | n |
| Zfp575  | y |
| Zfp575  | y |
| Zfp575  | y |
| Zfp575  | n |
| Ethe1   | n |
| Zfp575  | n |
| Ethe1   | n |
| Ethe1   | n |
| Zfp575  | n |
| Phldb3  | y |
| Phldb3  | y |
| Phldb3  | y |
| Zfp575  | y |
| Zfp575  | y |
| Tex101  | y |
| Tex101  | y |
| Lypd3   | y |
| Lypd3   | y |
| Tex101  | y |
| Lypd3   | y |
| Tex101  | y |
| Gm4763  | n |
| Arhgef1 | n |

|               |   |
|---------------|---|
| Rabac1        | n |
| Arhgef1       | n |
| Grik5         | n |
| Grik5         | n |
| Zfp574        | n |
| Pou2f2        | n |
| D930028M14Rik | n |
| D930028M14Rik | n |
| Pou2f2        | n |
| Pou2f2        | n |
| D930028M14Rik | n |
| Pou2f2        | n |
| D930028M14Rik | n |
| Pou2f2        | n |
| Pou2f2        | n |
| D930028M14Rik | n |
| Pou2f2        | n |
| D930028M14Rik | n |
| Pou2f2        | n |
| Pou2f2        | n |
| Megf8         | y |
| Pafah1b3      | y |
| Pafah1b3      | y |
| Megf8         | n |
| Pafah1b3      | n |
| Megf8         | n |
| Lipe          | n |
| B3gnt8        | y |
| B3gnt8        | y |
| B3gnt8        | y |
| Ccdc97        | n |
| Tgfb1         | n |
| Tgfb1         | n |
| Ccdc97        | n |
| Tgfb1         | n |
| Ccdc97        | n |
| Hnrnpul1      | n |

|           |   |
|-----------|---|
| Axl       | n |
| Axl       | n |
| Tgfb1     | y |
| Cyp2b10   | n |
| BC024978  | y |
| Ltbp4     | n |
| Ltbp4     | n |
| Ltbp4     | n |
| Blvrb     | n |
| Blvrb     | n |
| Blvrb     | n |
| Sptbn4    | y |
| Akt2      | n |
| Pld3      | n |
| BC089491  | n |
| Paf1      | n |
| Paf1      | n |
| Paf1      | n |
| Mir466f-2 | n |
| Samd4b    | n |
| Samd4b    | n |
| Mir466f-2 | n |
| Nccrp1    | n |
| Sycn      | n |
| Sycn      | n |
| Fbxo27    | n |
| Mrps12    | y |
| Mrps12    | y |
| Fbxo27    | y |
| Mrps12    | n |
| Mrps12    | n |

|           |   |
|-----------|---|
| Mrps12    | n |
| Gm19897   | y |
| Capn12    | n |
| Capn12    | n |
| Actn4     | n |
| Map4k1    | n |
| Map4k1    | n |
| Rasgrp4   | y |
| Spred3    | y |
| Ggn       | y |
| Spred3    | y |
| Ggn       | y |
| Spred3    | y |
| Ggn       | y |
| Psm8      | y |
| Psm8      | y |
| Ggn       | n |
| Psm8      | n |
| Ggn       | n |
| Psm8      | n |
| Ggn       | n |
| Psm8      | n |
| Psm8      | n |
| Psm8      | n |
| Yif1b     | y |
| Yif1b     | y |
| Yif1b     | y |
| Catsperg1 | y |
| Catsperg1 | y |
| Yif1b     | y |
| Yif1b     | y |
| Catsperg1 | y |
| Yif1b     | y |
| Sipa13    | n |
| Dpf1      | n |
| Dpf1      | n |
| Sipa13    | n |
| Sipa13    | n |

|         |   |
|---------|---|
| Zfp940  | n |
| Zfp30   | n |
| Zfp568  | n |
| Zfp568  | n |
| Nphs1   | n |
| Upk1a   | n |
| Etv2    | n |
| Ffar2   | n |
| Ffar2   | n |
| Krtdap  | y |
| Ffar2   | y |
| Ffar3   | y |
| Mag     | n |
| Lsr     | y |
| Lsr     | y |
| Lsr     | y |
| Fam187b | y |
| Lsr     | y |
| Fam187b | y |
| Lsr     | y |
| Lsr     | y |
| Fam187b | y |
| Fam187b | y |
| Fam187b | n |
| Fam187b | n |
| Lgi4    | y |
| Lgi4    | y |
| Fxyd1   | y |
| Lgi4    | y |
| Fxyd1   | y |
| Lgi4    | n |
| Lgi4    | n |
| Lgi4    | n |
| Lgi4    | y |
| Hpn     | y |
| Hpn     | y |
| Lgi4    | y |
| Lgi4    | y |
| Lgi4    | y |
| Hpn     | y |
| Hpn     | y |

|               |   |
|---------------|---|
| Gm10640       | y |
| Scgb2b15      | n |
| Cebpa         | n |
| Cep89         | n |
| Ankrd27       | y |
| Ankrd27       | y |
| Rgs9bp        | y |
| Ankrd27       | n |
| Zfp507        | n |
| Zfp536        | n |
| 1600014C10Rik | n |
| Zfp536        | n |
| 1600014C10Rik | n |
| Zfp536        | n |
| Uri1          | n |
| Uri1          | n |
| 1600014C10Rik | n |
| Uri1          | n |
| Uri1          | n |
| Uri1          | n |
| Ccne1         | n |
| 1600014C10Rik | n |
| Plekhf1       | n |
| 1600014C10Rik | n |
| Gm5114        | n |
| Vmn2r57       | n |
| Acpt          | n |
| Shank1        | n |
| 1700008O03Rik | n |
| Emc10         | n |
| Mybpc2        | y |
| Spib          | y |
| Napsa         | n |
| Myh14         | n |
| Izumo2        | y |
| Myh14         | y |
| Izumo2        | y |
| Izumo2        | y |
| Izumo2        | n |
| Izumo2        | n |
| Vrk3          | n |





|         |   |
|---------|---|
| Tead2   | y |
| Cd37    | y |
| Tead2   | y |
| Cd37    | y |
| Cd37    | y |
| Cd37    | y |
| Tead2   | y |
| Cd37    | y |
| Cd37    | n |
| Tead2   | n |
| Cd37    | n |
| Tead2   | n |
| Ruvbl2  | y |
| Tulp2   | y |
| Tulp2   | y |
| Nucb1   | y |
| Tulp2   | y |
| Nucb1   | y |
| Nucb1   | y |
| Fut1    | y |
| Fut1    | y |
| Fgf21   | y |
| Fut1    | y |
| Fgf21   | y |
| Fgf21   | y |
| Rasip1  | n |
| Rasip1  | n |
| Mamstr  | n |
| Mamstr  | n |
| Fut2    | n |
| Fut2    | n |
| Fut2    | n |
| Lmtk3   | y |
| Kdelr1  | n |
| Grin2d  | n |
| Tmem143 | n |
| Ccdc114 | y |
| Emp3    | y |

|               |   |
|---------------|---|
| Ccdc114       | y |
| Emp3          | y |
| Nomo1         | y |
| Nomo1         | y |
| Nomo1         | y |
| Abcc6         | y |
| Abcc8         | n |
| Kcnc1         | n |
| Kcnc1         | n |
| Kcnc1         | n |
| Saa2          | y |
| Nav2          | n |
| E2f8          | n |
| Dbx1          | n |
| Dbx1          | n |
| Dbx1          | n |
| Nav2          | n |
| Dbx1          | n |
| Nav2          | n |
| Nav2          | n |
| Nav2          | n |
| Dbx1          | n |
| Dbx1          | n |
| Dbx1          | n |
| Nell1os       | n |
| Gas2          | n |
| Oca2          | n |
| Klf13         | y |
| Apba2         | y |
| Tjp1          | n |
| Tjp1          | n |
| 1810008I18Rik | n |
| Chsy1         | n |
| Lrrk1         | n |
| Lysmd4        | n |
| Ttc23         | n |
| Ttc23         | n |
| Lrrc28        | n |
| Lrrc28        | n |
| Lrrc28        | n |
| Ttc23         | n |

|               |   |
|---------------|---|
| Ttc23         | n |
| Ttc23         | n |
| Synm          | n |
| 4833412C05Rik | n |
| 4833412C05Rik | n |
| Igf1r         | n |
| Igf1r         | n |
| Igf1r         | n |
| Pgpep1l       | y |
| Fam169b       | y |
| Fam169b       | y |
| Pgpep1l       | y |
| Pgpep1l       | y |
| B130024G19Rik | y |
| Gm36633       | n |
| Gm36633       | n |
| 1700011C11Rik | n |
| 1700011C11Rik | n |
| Fam174b       | n |
| Sv2b          | y |
| Akap13        | n |
| E430016F16Rik | n |
| Fanci         | n |
| Polg          | y |
| Fanci         | y |
| Polg          | y |
| Fanci         | y |
| Polg          | y |
| Polg          | y |
| AI854517      | n |
| AI854517      | n |
| Polg          | n |
| Polg          | n |
| AI854517      | n |
| Polg          | n |
| AI854517      | n |
| Rhcg          | n |
| Rhcg          | n |
| Rhcg          | n |
| AI854517      | n |
| Rhcg          | n |

|         |   |
|---------|---|
| Ticrr   | n |
| Mesp1   | y |
| Mesp1   | y |
| Anpep   | n |
| Mesp2   | n |
| Mesp2   | n |
| Mesp2   | n |
| Anpep   | n |
| Gm21057 | n |
| Gm21057 | n |
| Gm21057 | n |
| Zfp710  | n |
| Zfp710  | n |
| Rccd1   | y |
| Hddc3   | n |
| Furin   | n |
| Hddc3   | n |
| Furin   | n |
| Hddc3   | n |
| Hddc3   | n |
| Hddc3   | n |
| Gm15880 | n |
| Iqgap1  | n |
| Iqgap1  | n |
| Zscan2  | n |
| Iqgap1  | n |
| Wdr73   | n |
| Alpk3   | y |
| Alpk3   | y |
| Sec11a  | y |
| Sec11a  | y |
| Alpk3   | y |

|        |   |
|--------|---|
| Sec11a | y |
| Alpk3  | y |
| Sec11a | y |
| Alpk3  | y |
| Sec11a | y |
| Alpk3  | y |
| Sec11a | y |
| Alpk3  | y |
| Sec11a | y |
| Alpk3  | y |
| Sec11a | y |
| Alpk3  | y |
| Sec11a | y |
| Alpk3  | y |
| Sec11a | y |
| Alpk3  | y |
| Sec11a | y |
| Alpk3  | y |
| Sec11a | y |
| Alpk3  | y |
| Sec11a | y |
| Alpk3  | y |
| Sec11a | y |
| Alpk3  | y |
| Sec11a | y |
| Alpk3  | y |
| Sec11a | y |
| Alpk3  | y |
| Sec11a | y |
| Sec11a | y |
| Sec11a | y |
| Alpk3  | y |
| Sec11a | y |
| Sec11a | y |



|               |   |
|---------------|---|
| Il16          | n |
| Mesdc1        | y |
| Mesdc2        | y |
| Mesdc1        | y |
| Mesdc2        | y |
| Mesdc1        | y |
| Me3           | n |
| Prss23        | n |
| Prss23        | n |
| Ccdc81        | y |
| Ankrd42       | n |
| Ankrd42       | n |
| Tenm4         | n |
| Gm15413       | n |
| Tenm4         | n |
| Usp35         | n |
| Myo7a         | n |
| Myo7a         | y |
| Gdpd4         | n |
| Tsku          | n |
| Gucy2d        | n |
| Tsku          | n |
| Tsku          | n |
| Gucy2d        | n |
| Gucy2d        | n |
| 2210018M11Rik | n |
| 2210018M11Rik | n |
| Lrrc32        | n |
| 2210018M11Rik | n |
| Wnt11         | y |
| Uvrag         | n |
| Wnt11         | n |
| Uvrag         | n |



|          |   |
|----------|---|
| Uvrag    | n |
| Wnt11    | n |
| Map6     | n |
| Map6     | n |
| Uvrag    | n |
| Uvrag    | n |
| Map6     | n |
| Map6     | n |
| Dgat2    | n |
| Map6     | n |
| Dgat2    | n |
| Map6     | n |
| Dgat2    | n |
| Map6     | n |
| Serpinh1 | y |
| Map6     | y |
| Map6     | y |
| Serpinh1 | y |
| Map6     | y |
| Serpinh1 | n |
| Map6     | n |
| Gdpd5    | n |
| Serpinh1 | n |
| Serpinh1 | n |
| Rps3     | n |
| Rps3     | n |
| Arrb1    | n |
| Rps3     | n |
| Arrb1    | n |
| Chrdl2   | n |
| Rab6a    | y |
| Plekhb1  | y |
| Fam168a  | n |
| Fam168a  | n |
| Arhgef17 | n |
| Fam168a  | n |
| Arhgef17 | n |
| Fam168a  | y |

|          |   |
|----------|---|
| Fam168a  | n |
| P2ry6    | n |
| Fam168a  | y |
| Fam168a  | y |
| P2ry6    | y |
| Fam168a  | n |
| P2ry2    | n |
| P2ry2    | n |
| Fchsd2   | n |
| Atg16l2  | n |
| Arap1    | n |
| Atg16l2  | n |
| Pde2a    | n |
| Art2a-ps | n |
| Pde2a    | n |
| Art2a-ps | n |
| Pde2a    | n |
| Art2a-ps | n |
| Art2a-ps | n |
| Clpb     | n |
| Phox2a   | y |
| Art1     | y |
| Art1     | n |
| Art1     | n |
| Arfip2   | n |
| Arfip2   | n |
| Dchs1    | n |
| Ilk      | n |
| Ilk      | n |
| Ilk      | y |
| Dchs1    | y |
| Stk33    | n |
| Trim66   | y |

|               |   |
|---------------|---|
| Rpl27a        | y |
| Trim66        | y |
| Rpl27a        | y |
| Trim66        | y |
| lpo7          | n |
| lpo7          | n |
| 1600010M07Rik | n |
| lpo7          | n |
| 1600010M07Rik | n |
| 1600010M07Rik | n |
| lpo7          | n |
| 1600010M07Rik | n |
| lpo7          | n |
| 1600010M07Rik | n |
| 1600010M07Rik | n |
| 1600010M07Rik | n |
| Swap70        | n |
| Sbf2          | n |
| Swap70        | n |
| Sbf2          | n |
| Swap70        | n |
| Sbf2          | n |
| Swap70        | n |
| Swap70        | n |
| Ampd3         | y |
| Ampd3         | y |
| Ampd3         | y |
| Ctr9          | n |
| Ctr9          | n |
| Usp47         | y |
| Dkk3          | y |
| Dkk3          | y |
| Parva         | n |
| 4930543E12Rik | n |
| 4930543E12Rik | n |
| Spon1         | n |
| A730082K24Rik | n |

|               |   |
|---------------|---|
| Sox6          | n |
| Sox6          | n |
| A730082K24Rik | n |
| A730082K24Rik | n |
| A730082K24Rik | n |
| Sox6          | n |
| Sox6          | n |
| 1110004F10Rik | n |
| Sox6          | n |
| 1110004F10Rik | n |
| Sox6          | n |
| Sox6          | n |
| 1110004F10Rik | y |
| Sox6          | y |
| Plekha7       | n |
| Plekha7       | n |
| 1110004F10Rik | n |
| Rps15a        | n |
| Xylt1         | n |
| Tmc5          | y |
| Tmc5          | y |
| Itpripl2      | y |
| Tmc5          | y |
| Itpripl2      | y |
| Tmc5          | y |
| Itpripl2      | y |
| Tmc5          | y |
| Knop1         | n |
| Knop1         | n |
| Gprc5b        | n |
| Gprc5b        | n |
| Igsf6         | y |
| Prkcb         | y |
| Ern2          | y |

|                |       |   |
|----------------|-------|---|
| Prkcb          |       | y |
| Ern2           |       | y |
| Prkcb          |       | y |
| 4930413G21Rik  |       | n |
| 4930413G21Rik  |       | n |
| 4930413G21Rik  |       | n |
| 4930571K23Rik  |       | n |
| Nsmce1         |       | n |
| Sbk1           |       | y |
| Il27           |       | y |
| Bola2          |       | n |
| Bola2          |       | n |
| Mapk3          |       | n |
| Ppp4c          |       | n |
| Mapk3          |       | n |
| Ppp4c          |       | y |
| Aldoa          |       | n |
| Aldoa          |       | n |
| 4930451I111Rik |       | y |
| Qprt           |       | y |
| AI467606       |       | y |
| AI467606       |       | y |
| AI467606       |       | y |
| Qprt           |       | y |
|                | 1-Sep | n |
| Zfp747         |       | n |
| Itgal          |       | n |
| Itgal          |       | n |
| Srcap          |       | n |
| Bcl7c          |       | n |
| Stx1b          |       | n |
| Prss36         |       | n |
| Kat8           |       | n |
| Prss36         |       | y |
| Kat8           |       | y |
| Kat8           |       | y |
| Kat8           |       | y |
| Prss36         |       | y |

|               |   |
|---------------|---|
| Prss36        | y |
| Kat8          | y |
| Prss36        | y |
| Kat8          | y |
| Kat8          | y |
| Kat8          | y |
| Prss36        | y |
| Trim72        | y |
| Trim72        | y |
| Pycard        | y |
| Pycard        | y |
| Trim72        | n |
| Trim72        | n |
| Trim72        | n |
| Pycard        | n |
| Pycard        | n |
| Slc5a2        | n |
| Rgs10         | n |
| Rgs10         | n |
| Bag3          | y |
| Wdr11         | n |
| Gm4265        | n |
| Tacc2         | n |
| Tacc2         | n |
| Btbd16        | n |
| Nsmce4a       | n |
| Gm10584       | y |
| Oat           | n |
| Lhpp          | n |
| Fam53b        | n |
| 4930483O08Rik | n |

|               |   |
|---------------|---|
| Ctbp2         | y |
| Bccip         | n |
| Dhx32         | n |
| Fam196a       | n |
| Clrn3         | n |
| Clrn3         | n |
| Ptpre         | n |
| C030029H02Rik | n |
| C230079O03Rik | n |
| C030029H02Rik | n |
| Gm6249        | n |
| Mgmt          | n |
| Gm6249        | n |
| Gm10578       | n |
| Tcerg1l       | n |
| Tcerg1l       | n |
| Stk32c        | n |
| Pwwp2b        | y |
| Pwwp2b        | y |
| Stk32c        | y |
| Stk32c        | y |
| Pwwp2b        | y |
| Stk32c        | y |
| Pwwp2b        | y |
| Stk32c        | y |
| Pwwp2b        | y |
| Stk32c        | y |
| Pwwp2b        | y |
| Stk32c        | y |
| Pwwp2b        | y |
| Stk32c        | y |
| Pwwp2b        | y |
| Stk32c        | y |
| Stk32c        | y |
| Stk32c        | n |
| Stk32c        | n |
| Inpp5a        | n |

|         |   |
|---------|---|
| Stk32c  | n |
| Stk32c  | n |
| Inpp5a  | n |
| Stk32c  | n |
| Nkx6-2  | n |
| Utf1    | y |
| Utf1    | y |
| Utf1    | y |
| Mir7686 | y |
| Mir7686 | n |
| Mir7686 | n |
| Nlrp6   | y |
| Ifitm2  | y |
| Sigirr  | n |
| Rassf7  | n |
| Mir210  | n |
| Deaf1   | y |
| Eps8l2  | y |
| Eps8l2  | y |
| Eps8l2  | y |
| Deaf1   | y |
| Deaf1   | y |
| Eps8l2  | y |
| Eps8l2  | y |
| Eps8l2  | y |
| Deaf1   | y |
| Eps8l2  | y |
| Deaf1   | y |
| Deaf1   | y |
| Deaf1   | y |
| Rplp2   | y |
| Cend1   | y |
| Rplp2   | y |
| Cend1   | y |
| Cend1   | y |



|               |   |
|---------------|---|
| Cend1         | y |
| Pidd1         | y |
| Cracr2b       | n |
| Cracr2b       | n |
| Polr2l        | n |
| Cracr2b       | n |
| Polr2l        | n |
| Cracr2b       | n |
| Polr2l        | n |
| Polr2l        | n |
| Polr2l        | n |
| Tspan4        | n |
| Polr2l        | n |
| Tspan4        | n |
| Polr2l        | n |
| Tspan4        | n |
| Tspan4        | n |
| Polr2l        | n |
| Tspan4        | n |
| Dusp8         | n |
| Ifitm10       | y |
| Prr33         | y |
| Prr33         | y |
| Tnnt3         | y |
| Prr33         | n |
| Mrpl23        | n |
| Nctc1         | n |
| Mrpl23        | n |
| H19           | n |
| Igf2          | n |
| Tssc4         | n |
| Kcnq1ot1      | n |
| Kcnq1ot1      | n |
| Kcnq1         | n |
| Kcnq1ot1      | n |
| Kcnq1         | n |
| 4933417O13Rik | n |
| 4933417O13Rik | n |
| 4933417O13Rik | n |
| Kcnq1         | n |
| Kcnq1         | n |

|               |   |
|---------------|---|
| Cdkn1c        | n |
| Kcnq1         | n |
| Kcnq1         | n |
| Cdkn1c        | n |
| Kcnq1         | n |
| Cdkn1c        | n |
| Kcnq1         | n |
| Cdkn1c        | n |
| Ctkn          | y |
| Shank2        | n |
| Fgf3          | n |
| Fgf3          | y |
| Fgf3          | y |
| Ccnd1         | y |
| Ccnd1         | n |
| Ccnd1         | n |
| Ccnd1         | n |
| Oraov1        | n |
| Ccnd1         | n |
| Oraov1        | n |
| Oraov1        | n |
| Ccnd1         | n |
| 1810010D01Rik | n |
| Mrgprf        | n |
| Mrgprf        | n |
| Pex11g        | y |
| Evi5l         | n |
| Prr36         | n |
| Evi5l         | n |
| Prr36         | n |
| Prr36         | n |
| Evi5l         | n |
| Evi5l         | n |

|               |   |
|---------------|---|
| Prr36         | n |
| Evi5l         | n |
| Prr36         | n |
| Prr36         | n |
| Prr36         | n |
| Tgfbr3l       | y |
| Tgfbr3l       | y |
| Tgfbr3l       | y |
| 4930453L07Rik | n |
| 4930453L07Rik | n |
| Efnb2         | n |
| Arglu1        | n |
| 4930453L07Rik | n |
| 4930453L07Rik | n |
| 4933430N04Rik | n |
| Myo16         | n |
| B930025P03Rik | n |
| 4833411C07Rik | n |
| Irs2          | n |
| 9530052E02Rik | n |
| 9530052E02Rik | n |
| Irs2          | n |
| 9530052E02Rik | n |
| Irs2          | n |
| Irs2          | n |
| 9530052E02Rik | n |
| Col4a1        | n |
| Col4a2        | n |
| Col4a2        | n |
| Rab20         | n |
| Col4a2        | n |
| Rab20         | y |
| Spaca7        | n |
| Gm15348       | y |
| Mcf2l         | n |
| Mcf2l         | n |
| Gm15350       | n |
| Mcf2l         | n |

|               |   |
|---------------|---|
| Mcf2l         | n |
| Gm15350       | n |
| Gm15350       | n |
| Mcf2l         | n |
| Gm15350       | y |
| Grtp1         | n |
| Lamp1         | y |
| Tmem255b      | y |
| Tmem255b      | y |
| Tmem255b      | n |
| 4932443119Rik | y |
| Rasa3         | n |
| 4932443119Rik | n |
| Erich1        | n |
| Kbtbd11       | n |
| BB014433      | n |
| Kbtbd11       | n |
| Mcph1         | y |
| Defb7         | n |
| Defa21        | n |
| Smim19        | n |
| Polb          | n |
| Polb          | n |
| Plat          | n |
| Plat          | n |
| lkbkb         | n |
| lkbkb         | n |
| Ank1          | y |
| Ank1          | y |
| Golga7        | n |
| Zmat4         | n |
| Tm2d2         | n |
| Htra4         | y |
| Tm2d2         | n |
| Plekha2       | n |
| Plekha2       | n |
| Fgfr1         | n |
| Fgfr1         | n |

|               |   |
|---------------|---|
| Fgfr1         | n |
| 5430421F17Rik | n |
| 5430421F17Rik | n |
| 5430421F17Rik | n |
| Gm16159       | n |
| Fgfr1         | n |
| Gm16159       | n |
| Fgfr1         | n |
| Gm16159       | n |
| Fgfr1         | n |
| Fgfr1         | n |
| Gm16159       | n |
| Gm16159       | n |
| Fgfr1         | n |
| Gm16159       | n |
| 1700047A11Rik | n |
| Hook3         | n |
| Thap1         | n |
| Zfp703        | n |
| 2310008N11Rik | n |
| Zfp703        | n |
| 2310008N11Rik | n |
| Zfp703        | n |
| 2310008N11Rik | n |
| Brf2          | y |
| Brf2          | y |
| Brf2          | y |
| Zfp703        | y |
| Zfp703        | y |
| Zfp703        | n |
| Zfp703        | n |
| Brf2          | n |
| Zfp703        | n |
| Brf2          | n |
| Zfp703        | n |



|               |   |
|---------------|---|
| Tti2          | y |
| Mak16         | n |
| Purg          | y |
| Purg          | y |
| Wrn           | y |
| Wrn           | y |
| Ppp2cb        | n |
| Ppp2cb        | n |
| Ubxn8         | n |
| Ubxn8         | n |
| Ppp2cb        | n |
| Ppp2cb        | n |
| Ppp2cb        | n |
| Gtf2e2        | n |
| Rbpms         | n |
| Gtf2e2        | n |
| Rbpms         | n |
| Rbpms         | n |
| Rbpms         | n |
| Gtf2e2        | n |
| Gtf2e2        | n |
| Rbpms         | n |
| Gtf2e2        | n |
| Rbpms         | n |
| Rbpms         | n |
| Gtf2e2        | n |
| Gtf2e2        | n |
| Rbpms         | n |
| Rbpms         | n |
| Gtf2e2        | n |
| Gtf2e2        | n |
| Rbpms         | n |
| Rbpms         | n |
| Rbpms         | n |
| Dctn6         | n |
| Dctn6         | n |
| Dctn6         | n |
| Saraf         | n |
| B930018H19Rik | n |
| B930018H19Rik | n |

|               |   |
|---------------|---|
| Dusp4         | n |
| B930018H19Rik | n |
| Dusp4         | n |
| Dusp4         | n |
| B930018H19Rik | n |
| Dusp4         | n |
| B930018H19Rik | n |
| B930018H19Rik | n |
| Dusp4         | n |
| Eri1          | n |
| Ppp1r3b       | n |
| Eri1          | n |
| Mfhas1        | y |
| Gm16793       | y |
| Mfhas1        | y |
| Mfhas1        | y |
| D8Ert82e      | n |
| Lonrf1        | n |
| Primpol       | n |
| Irf2          | n |
| Irf2          | n |
| Enpp6         | n |
| Stox2         | n |
| Stox2         | n |
| Stox2         | n |
| Enpp6         | n |
| Stox2         | n |
| Rwdd4a        | n |
| Rwdd4a        | n |
| Rwdd4a        | n |
| Stox2         | n |
| Stox2         | n |
| Tenm3         | n |



|               |   |
|---------------|---|
| Dctd          | n |
| Gm2516        | n |
| Hand2         | n |
| Hand2         | n |
| LOC102636514  | n |
| Galnt7        | n |
| Galnt7        | n |
| Galnt7        | n |
| AW046200      | n |
| AW046200      | n |
| AW046200      | n |
| Galnt7        | n |
| Galnt7        | n |
| Sh3rf1        | n |
| 1700001D01Rik | n |
| 1700001D01Rik | n |
| Palld         | n |
| Cbr4          | y |
| Tmem192       | n |
| Tmem192       | n |
| Tmem192       | n |
| Trim75        | n |
| Tmem192       | n |
| Tmem192       | n |
| Sh2d4a        | y |
| Sh2d4a        | y |
| Psd3          | y |
| Psd3          | y |
| Sh2d4a        | y |
| 1700125H03Rik | n |
| Atp6v1b2      | n |
| Atp6v1b2      | n |
| Lzts1         | n |
| Cilp2         | n |
| Pbx4          | n |
| Cilp2         | n |
| Ncan          | n |
| Ncan          | n |
| Mef2b         | n |
| Mef2b         | n |
| Rfxank        | n |

|               |   |
|---------------|---|
| Mef2b         | n |
| Rfxank        | n |
| Mef2b         | n |
| Mef2b         | n |
| Slc25a42      | n |
| Mef2b         | n |
| Cers1         | y |
| Upf1          | y |
| Gdf1          | n |
| Gdf1          | n |
| Upf1          | n |
| Crlf1         | y |
| Crlf1         | y |
| Tmem59l       | y |
| Tmem59l       | y |
| Crlf1         | y |
| Tmem59l       | y |
| Crlf1         | y |
| Tmem59l       | y |
| Tmem59l       | y |
| Crlf1         | y |
| Tmem59l       | y |
| Crlf1         | y |
| Tmem59l       | y |
| 2810428l15Rik | y |
| 2810428l15Rik | y |
| Isyna1        | y |
| Ssbp4         | n |
| Isyna1        | n |
| Isyna1        | n |
| Isyna1        | n |
| Ssbp4         | n |
| Isyna1        | n |
| Ssbp4         | n |
| Isyna1        | n |
| Ssbp4         | n |
| Isyna1        | n |
| Isyna1        | n |



|         |   |
|---------|---|
| Gm3336  | y |
| Pde4c   | n |
| Pde4c   | n |
| Rab3a   | y |
| Mast3   | n |
| Il12rb1 | n |
| Arrdc2  | n |
| Arrdc2  | n |
| Il12rb1 | n |
| Arrdc2  | n |
| Il12rb1 | n |
| Arrdc2  | n |
| Il12rb1 | n |
| Arrdc2  | n |
| Il12rb1 | n |
| Arrdc2  | n |
| Il12rb1 | n |
| Arrdc2  | n |
| Il12rb1 | n |
| Arrdc2  | n |
| Il12rb1 | n |
| Arrdc2  | n |
| Il12rb1 | n |
| Arrdc2  | n |
| Il12rb1 | n |
| Arrdc2  | n |
| Il12rb1 | n |
| Arrdc2  | n |
| Il12rb1 | n |
| Arrdc2  | n |
| Il12rb1 | n |
| Arrdc2  | n |
| Il12rb1 | n |
| Arrdc2  | n |
| Il12rb1 | n |
| Arrdc2  | n |
| Il12rb1 | n |
| Arrdc2  | n |
| Map1s   | n |
| Map1s   | n |
| Map1s   | n |
| Slc5a5  | y |
| Slc5a5  | y |

|        |   |
|--------|---|
| Map1s  | y |
| Map1s  | y |
| Myo9b  | n |
| Nr2f6  | n |
| Dda1   | n |
| Bst2   | n |
| Bst2   | n |
| Bst2   | n |
| Mvb12a | n |
| Bst2   | n |
| Mvb12a | n |
| Bst2   | n |
| Mvb12a | n |
| Nxn1   | y |
| Jak3   | n |
| Insl3  | y |
| B3gnt3 | y |
| B3gnt3 | y |
| B3gnt3 | y |
| Insl3  | y |
| B3gnt3 | y |
| Insl3  | y |
| Insl3  | y |
| Insl3  | y |
| B3gnt3 | y |
| Insl3  | y |
| Insl3  | y |
| B3gnt3 | y |
| Insl3  | y |
| Fcho1  | n |

|          |   |
|----------|---|
| Fcho1    | n |
| Tpm4     | y |
| Ap1m1    | n |
| Ap1m1    | n |
| Cib3     | n |
| Eps15l1  | y |
| Eps15l1  | y |
| Eps15l1  | y |
| Klf2     | y |
| Large    | n |
| Large    | y |
| Mir28b   | n |
| Gm10649  | n |
| Tmem184c | y |
| Ttc29    | n |
| Pou4f2   | n |
| Ttc29    | n |
| Pou4f2   | n |
| Pou4f2   | n |
| Smad1    | n |
| Gm4890   | n |
| Smad1    | n |
| Hhip     | n |
| Gypa     | n |
| Hhip     | n |
| Gab1     | n |
| Scoc     | y |
| Tecr     | n |
| Ndufb7   | n |
| Gipc1    | n |
| Pkn1     | n |
| Gipc1    | n |
| Gipc1    | n |
| Pkn1     | n |
| Ptger1   | n |
| Ddx39    | n |
| Ddx39    | n |
| Ddx39    | y |



|               |   |
|---------------|---|
| Rln3          | y |
| Rln3          | y |
| Rln3          | y |
| Dcaf15        | y |
| 4930432K21Rik | n |
| Mir181c       | n |
| Mir181c       | n |
| Cacna1a       | n |
| Lyl1          | n |
| Lyl1          | n |
| Nfix          | n |
| Lyl1          | n |
| Nfix          | n |
| Lyl1          | n |
| Nfix          | n |
| Nfix          | n |
| Nfix          | n |
| Lyl1          | n |
| Nfix          | n |
| Lyl1          | n |
| Lyl1          | n |
| Lyl1          | n |
| Nfix          | n |
| Lyl1          | n |
| Nfix          | n |
| Lyl1          | n |
| Lyl1          | n |
| Nfix          | n |
| Gadd45gip1    | n |
| Nfix          | n |
| Nfix          | n |
| Gadd45gip1    | n |
| Gadd45gip1    | n |
| Nfix          | n |
| Nfix          | n |
| Gadd45gip1    | n |
| Gadd45gip1    | n |
| Gadd45gip1    | n |



|            |   |
|------------|---|
| Gadd45gip1 | n |
| Nfix       | n |
| Gadd45gip1 | n |
| Nfix       | n |
| Gadd45gip1 | n |
| Nfix       | n |
| Nfix       | n |
| Gadd45gip1 | n |
| Nfix       | n |
| Gadd45gip1 | n |
| Nfix       | n |
| Gadd45gip1 | n |
| Nfix       | n |
| Gadd45gip1 | n |
| Nfix       | n |
| Gadd45gip1 | n |
| Gadd45gip1 | n |
| Gadd45gip1 | n |
| Nfix       | n |
| Gadd45gip1 | n |
| Nfix       | n |
| Gadd45gip1 | n |
| Gadd45gip1 | n |
| Nfix       | n |
| Nfix       | n |

|               |   |
|---------------|---|
| Nfix          | n |
| Nfix          | n |
| Gadd45gip1    | n |
| Gadd45gip1    | n |
| Nfix          | n |
| Nfix          | n |
| Nfix          | n |
| Gadd45gip1    | n |
| Gadd45gip1    | n |
| Nfix          | n |
| Gcdh          | y |
| Mast1         | n |
| LOC100503676  | n |
| Mast1         | n |
| LOC100503676  | n |
| LOC100503676  | n |
| LOC100503676  | n |
| Mast1         | n |
| LOC100503676  | n |
| Junb          | n |
| Junb          | n |
| Hook2         | n |
| Junb          | n |
| Lonp2         | n |
| Gm10638       | n |
| N4bp1         | n |
| Gm2694        | y |
| Zfp423        | n |
| Zfp423        | n |
| 4933402J07Rik | n |
| Zfp423        | n |
| Brd7          | y |
| Brd7          | n |
| Adcy7         | n |





|               |   |
|---------------|---|
| Snx20         | n |
| Nod2          | n |
| Snx20         | n |
| Nod2          | n |
| Snx20         | n |
| Chd9          | y |
| Tox3          | y |
| Chd9          | y |
| Chd9          | y |
| Chd9          | n |
| Chd9          | n |
| Rpgrip1l      | n |
| Fto           | n |
| Irx5          | n |
| Crnde         | n |
| Irx5          | n |
| Crnde         | n |
| Crnde         | n |
| Irx5          | n |
| Gnao1         | n |
| 9330175E14Rik | n |
| Ciapi1        | n |
| Polr2c        | y |
| Gpr114        | n |
| Ccdc102a      | y |
| Ccdc102a      | y |
| Gpr56         | n |
| Gpr56         | n |
| Ccdc102a      | n |

|               |   |
|---------------|---|
| Katnb1        | y |
| Kifc3         | y |
| Mmp15         | n |
| Cfap20        | n |
| Tk2           | n |
| Tk2           | n |
| Dync1li2      | n |
| Dync1li2      | n |
| Ces4a         | n |
| Ces4a         | n |
| Ces4a         | n |
| B3gnt9        | y |
| Fbxl8         | n |
| Fbxl8         | n |
| Fbxl8         | n |
| Tradd         | n |
| Fbxl8         | n |
| Tradd         | n |
| Fbxl8         | n |
| Tradd         | n |
| Fbxl8         | n |
| Fbxl8         | n |
| Tradd         | n |
| Fbxl8         | y |
| Tradd         | y |
| Tradd         | y |
| Tradd         | y |
| Hsf4          | y |
| Tradd         | y |
| Hsf4          | y |
| Tradd         | y |
| Tradd         | y |
| Hsf4          | n |
| 4931428F04Rik | n |
| Tmem208       | n |
| Slc9a5        | y |
| Fhod1         | n |
| Fhod1         | n |

|               |   |
|---------------|---|
| Plekhg4       | y |
| Plekhg4       | n |
| Atp6v0d1      | y |
| Fam65a        | n |
| Fam65a        | n |
| Agrp          | n |
| Fam65a        | n |
| Agrp          | n |
| Fam65a        | n |
| Agrp          | n |
| Acd           | n |
| Rltpr         | n |
| Acd           | n |
| Rltpr         | n |
| Acd           | n |
| Acd           | n |
| Rltpr         | n |
| Acd           | n |
| Rltpr         | n |
| Acd           | n |
| Rltpr         | n |
| Acd           | n |
| Rltpr         | n |
| Acd           | n |
| Rltpr         | n |
| 4933405L10Rik | n |
| Gfod2         | n |
| 4933405L10Rik | n |
| Gfod2         | n |
| 4930506A18Rik | n |
| Cdh1          | n |
| Cdh1          | n |
| Tango6        | n |







|               |   |
|---------------|---|
| Pkd1l2        | n |
| Pkd1l2        | n |
| Pkd1l2        | n |
| Cmip          | n |
| Cmip          | n |
| Sdr42e1       | n |
| Plcg2         | n |
| Hsd17b2       | y |
| Sdr42e1       | y |
| Slc38a8       | n |
| Mlycd         | n |
| Necab2        | n |
| Necab2        | n |
| Slc38a8       | y |
| Necab2        | y |
| Wfdc1         | n |
| Kcng4         | n |
| Wfdc1         | n |
| Cotl1         | n |
| Cotl1         | y |
| Crispld2      | n |
| Crispld2      | n |
| 6430548M08Rik | n |
| 6430548M08Rik | n |
| Zdhhc7        | n |
| Fam92b        | n |
| 6430548M08Rik | y |
| 6430548M08Rik | n |
| 6430548M08Rik | n |
| A330074K22Rik | n |
| 6430548M08Rik | n |
| A330074K22Rik | n |
| A330074K22Rik | n |
| 6430548M08Rik | n |



|               |   |
|---------------|---|
| Gse1          | n |
| Gse1          | n |
| Gse1          | n |
| Gins2         | n |
| Gse1          | n |
| Gse1          | n |
| Gins2         | n |
| Gse1          | n |
| Gins2         | n |
| Irf8          | n |
| Irf8          | n |
| Emc8          | n |
| Irf8          | n |
| Foxf1         | n |
| Foxl1         | n |
| Foxl1         | n |
| Mthfsd        | n |
| Foxl1         | n |
| Mthfsd        | n |
| Mthfsd        | n |
| Foxl1         | n |
| 1700030M09Rik | n |
| 1700030M09Rik | n |
| 1700018B08Rik | n |
| 1700018B08Rik | n |
| 1700030M09Rik | n |
| 1700018B08Rik | n |
| 1700030M09Rik | n |
| 1700018B08Rik | n |
| 1700030M09Rik | n |
| Trhr2         | n |
| Zfpm1         | n |
| Trhr2         | n |
| Zfpm1         | n |
| Trhr2         | n |
| Zfpm1         | n |

|          |   |
|----------|---|
| Trhr2    | n |
| Trhr2    | n |
| Ctu2     | n |
| Piezo1   | n |
| Ctu2     | n |
| Cdt1     | n |
| Piezo1   | n |
| Piezo1   | n |
| Cdt1     | n |
| Piezo1   | n |
| Piezo1   | n |
| Cdt1     | y |
| Piezo1   | y |
| Piezo1   | y |
| Cdt1     | y |
| Aprt     | y |
| Aprt     | y |
| Trappc2l | n |
| Cbfa2t3  | n |
| Trappc2l | n |
| Cbfa2t3  | n |
| Trappc2l | n |
| Cbfa2t3  | n |
| Trappc2l | n |
| Cbfa2t3  | n |
| Trappc2l | n |
| Cbfa2t3  | n |
| Cbfa2t3  | n |
| Cbfa2t3  | n |
| Trappc2l | y |
| Cbfa2t3  | y |
| Trappc2l | y |
| Cbfa2t3  | y |
| Cbfa2t3  | y |
| Cbfa2t3  | y |
| Trappc2l | y |
| Cbfa2t3  | y |

|          |   |
|----------|---|
| Cbfa2t3  | y |
| Trappc2l | n |
| Cbfa2t3  | n |
| Cpne7    | y |
| Sult5a1  | y |
| Cpne7    | n |
| Fanca    | y |
| Urb2     | n |
| Galnt2   | n |
| Galnt2   | n |
| Pgbd5    | n |
| Galnt2   | n |
| Pgbd5    | n |
| Pgbd5    | n |
| Arv1     | n |
| Egln1    | n |
| Disc1    | n |
| Sipa1l2  | n |
| Disc1    | n |
| Sipa1l2  | n |
| Disc1    | n |
| Sipa1l2  | n |
| Sipa1l2  | n |
| Disc1    | n |
| Disc1    | n |
| Sipa1l2  | n |
| Sipa1l2  | n |
| Ntpcr    | n |
| Pcnxl2   | n |
| Ntpcr    | n |
| Ntpcr    | n |
| Irf2bp2  | n |
| Coa6     | n |
| Irf2bp2  | n |
| Coa6     | n |

|         |   |
|---------|---|
| Irf2bp2 | n |
| Coa6    | n |
| Coa6    | n |
| Tomm20  | n |
| Pard3   | n |
| Pard3   | n |
| Nrp1    | n |
| Mir101c | n |
| Mir101c | n |
| Cep57   | n |
| Endod1  | n |
| Endod1  | y |
| Fut4    | y |
| Fut4    | y |
| Izumo1r | y |
| Smco4   | n |
| Ccdc67  | n |
| Smco4   | n |
| Chordc1 | n |
| Olfir24 | n |
| Ubl5    | y |
| Fbxl12  | y |
| Ubl5    | y |
| Fbxl12  | y |
| Ubl5    | y |
| Fbxl12  | y |
| Ubl5    | y |
| Fbxl12  | y |
| Ubl5    | y |
| Fbxl12  | y |
| Ubl5    | y |
| Fbxl12  | y |
| Ubl5    | y |
| Fbxl12  | y |
| Ubl5    | y |
| Fbxl12  | y |
| Ubl5    | y |
| Fbxl12  | y |
| Ppan    | n |
| Mrpl4   | n |
| Icam5   | n |
| Icam5   | n |

|          |   |
|----------|---|
| Icam5    | n |
| Icam5    | n |
| Mir1900  | n |
| Pde4a    | n |
| S1pr5    | y |
| Slc44a2  | y |
| Slc44a2  | y |
| Ap1m2    | y |
| Ap1m2    | n |
| Spc24    | n |
| Gm6484   | n |
| Gm6484   | n |
| Swsap1   | y |
| Epor     | y |
| Epor     | y |
| Epor     | y |
| Prkcsh   | y |
| Prkcsh   | n |
| Ccdc151  | n |
| Ccdc151  | n |
| Zfp653   | n |
| Cnn1     | y |
| Acp5     | y |
| Mir680-2 | y |
| Bmper    | n |
| Rp9      | n |
| Rp9      | n |
| Dpy1911  | n |
| Npsr1    | n |
| Npsr1    | n |
| Snx19    | n |
| St14     | n |
| Arhgap32 | n |
| Arhgap32 | n |



|               |   |
|---------------|---|
| Ets1          | n |
| Ets1          | n |
| Fli1          | n |
| Ets1          | n |
| Kirrel3       | n |
| Kirrel3       | n |
| Kirrel3       | n |
| St3gal4       | n |
| 4933422A05Rik | n |
| Ddx25         | n |
| Pknox2        | n |
| Robo4         | n |
| Robo3         | n |
| Robo3         | n |
| Robo3         | n |
| Robo4         | n |
| Robo3         | n |
| Robo3         | n |
| Esam          | n |
| Nrgn          | n |
| Zfp202        | n |
| Zfp202        | n |
| 1700110K17Rik | n |
| Gramd1b       | n |
| 1700110K17Rik | n |
| 1700110K17Rik | n |
| Gramd1b       | n |
| 1700110K17Rik | n |
| 1700110K17Rik | n |
| Gramd1b       | n |
| 1700110K17Rik | n |
| Gramd1b       | n |
| 1700110K17Rik | n |
| Gramd1b       | n |

|               |   |
|---------------|---|
| Clmp          | n |
| Clmp          | n |
| 4931429I11Rik | n |
| 4931429I11Rik | n |
| 1700063D05Rik | n |
| Ubash3b       | n |
| 1700063D05Rik | y |
| 3110039I08Rik | n |
| 2610203C20Rik | n |
| 4930546K05Rik | n |
| D630033O11Rik | n |
| Grik4         | n |
| Grik4         | n |
| D630033O11Rik | n |
| D630033O11Rik | n |
| D630033O11Rik | n |
| Grik4         | n |
| D630033O11Rik | n |
| Grik4         | n |
| D630033O11Rik | y |
| Oaf           | y |
| D630033O11Rik | n |
| Oaf           | n |
| Oaf           | n |
| Pvrl1         | y |
| Rnf26         | y |
| Pvrl1         | n |
| Pvrl1         | n |
| Rnf26         | n |
| Thy1          | y |
| Rnf26         | y |
| Usp2          | y |
| Mcam          | n |
| Nlr1          | y |
| Dpagt1        | n |



|               |   |
|---------------|---|
| Pafah1b2      | n |
| Sik3          | n |
| Sik3          | n |
| Bud13         | n |
| Bud13         | n |
| Bud13         | n |
| 4931429L15Rik | n |
| 4931429L15Rik | n |
| Cadm1         | n |
| Gm5617        | n |
| Zbtb16        | n |
| Gm5617        | n |
| Gm5617        | n |
| Gm5617        | n |
| Zbtb16        | n |
| Zbtb16        | n |
| Gm5617        | n |
| Zbtb16        | n |
| Gm5617        | n |
| Gm5617        | n |
| Zbtb16        | n |
| Usp28         | n |
| Zbtb16        | n |
| Plet1         | n |
| Plet1         | n |
| Plet1os       | n |
| Plet1         | n |
| Cryab         | y |
| Sik2          | n |
| Ppp2r1b       | n |
| Gm684         | y |
| Pou2af1       | n |
| Rdx           | n |

|               |   |
|---------------|---|
| AI593442      | y |
| Sh2d7         | y |
| Sh2d7         | y |
| AY074887      | n |
| Chrn4         | n |
| Etfa          | n |
| AI118078      | n |
| AI118078      | n |
| Etfa          | n |
| Etfa          | n |
| Tspan3        | n |
| Pstpip1       | n |
| Hmg20a        | n |
| Hmg20a        | n |
| Lingo1        | n |
| Odf3l1        | y |
| Cspg4         | n |
| Snx33         | n |
| Snx33         | n |
| Snx33         | n |
| Trcg1         | n |
| Trcg1         | n |
| 4930430J02Rik | n |
| Ppcdc         | n |
| Ulk3          | n |
| Ecd3          | n |
| Arid3b        | n |
| Sema7a        | n |
| Sema7a        | n |
| Ccdc33        | n |
| Cyp11a1       | n |
| Stra6         | n |
| Stra6         | y |
| Stoml1        | y |
| Loxl1         | y |
| Loxl1         | y |
| Stoml1        | y |
| Loxl1         | y |



|               |   |
|---------------|---|
| Rplp1         | n |
| Rplp1         | n |
| Rplp1         | n |
| Anp32a        | n |
| Coro2b        | n |
| Anp32a        | n |
| Anp32a        | n |
| Coro2b        | n |
| Coro2b        | n |
| Itga11        | n |
| Skor1         | n |
| Calml4        | n |
| Calml4        | n |
| Aagab         | n |
| Aagab         | n |
| Smad3         | n |
| Aagab         | n |
| Aagab         | n |
| Aagab         | n |
| Smad3         | n |
| Smad3         | n |
| Aagab         | n |
| Smad3         | n |
| Smad3         | n |
| 1110036E04Rik | n |
| 1110036E04Rik | n |
| Smad6         | n |
| 1110036E04Rik | n |
| Smad6         | n |
| 1110036E04Rik | n |
| 1110036E04Rik | n |
| Smad6         | n |
| 1110036E04Rik | n |
| 1110036E04Rik | n |
| Smad6         | n |
| Smad6         | n |
| 1110036E04Rik | n |

|               |   |
|---------------|---|
| Smad6         | n |
| 1110036E04Rik | n |
| 1110036E04Rik | n |
| Smad6         | n |
| 1110036E04Rik | n |
| Smad6         | n |
| 1700055C04Rik | n |
| 1700055C04Rik | n |
| 1700055C04Rik | n |
| 1110036E04Rik | n |
| 1110036E04Rik | n |
| 1110036E04Rik | n |
| 1700055C04Rik | n |
| 1700055C04Rik | n |
| 1700055C04Rik | n |
| Dis3l         | n |
| Rab11a        | n |
| Slc24a1       | n |
| Slc24a1       | n |
| Vwa9          | y |
| Igdcc4        | y |
| Igdcc4        | y |
| Ptplad1       | y |
| Igdcc4        | y |
| Ptplad1       | y |
| Igdcc4        | y |
| Igdcc4        | y |
| Igdcc4        | y |
| Ptplad1       | y |
| Spg21         | n |
| Plekho2       | n |
| Plekho2       | n |
| Spg21         | n |
| Plekho2       | n |



|               |   |
|---------------|---|
| Spg21         | n |
| Plekho2       | n |
| Plekho2       | y |
| Ppib          | n |
| Snx22         | n |
| Ppib          | n |
| Dapk2         | n |
| Herc1         | y |
| Herc1         | y |
| Fbxl22        | y |
| Car12         | n |
| Car12         | n |
| Rab8b         | n |
| Car12         | n |
| Rab8b         | n |
| Vps13c        | n |
| Rora          | n |
| Rora          | n |
| Rora          | n |
| Foxb1         | n |
| B230323A14Rik | n |
| B230323A14Rik | n |
| B230323A14Rik | n |
| Fam81a        | n |
| Fam81a        | y |
| Fam81a        | y |
| Fam81a        | y |
| Adam10        | n |
| Aldh1a2       | n |
| Polr2m        | n |
| Zfp280d       | n |
| Ccp1os        | n |
| Ccp1os        | n |
| Ccp1os        | n |
| Ccp1          | n |
| Pigb          | n |
| Ccp1          | n |
| Ccp1          | n |
| Pigb          | n |
| Rab27a        | n |
| Pigb          | n |

|               |   |
|---------------|---|
| Pigb          | n |
| Unc13c        | n |
| Unc13c        | n |
| Mapk6         | n |
| Myo5a         | y |
| Mapk6         | n |
| Mapk6         | n |
| Ddx43         | n |
| Cd109         | n |
| 4930429F24Rik | n |
| Snx14         | n |
| 1700034K08Rik | n |
| Slc9a9        | n |
| Tfdp2         | n |
| Tfdp2         | n |
| Tfdp2         | n |
| Rnf7          | n |
| Rasa2         | y |
| Zbtb38        | n |
| Pxylp1        | n |
| C430002N11Rik | n |
| C430002N11Rik | n |
| Spsb4         | n |
| 4930579K19Rik | n |
| 4930579K19Rik | n |
| Rbp2          | n |
| 4930579K19Rik | n |
| Ky            | n |
| Ephb1         | n |
| Cep63         | y |
| Anapc13       | n |
| Amotl2        | n |
| Amotl2        | n |
| Cep63         | n |
| Amotl2        | n |
| Cep63         | n |
| Cep63         | n |
| Gm5627        | n |

|               |   |
|---------------|---|
| Ryk           | n |
| Srprb         | n |
| 1300017J02Rik | y |
| Ackr4         | n |
| Alas1         | n |
| Poc1a         | n |
| Poc1a         | n |
| Poc1a         | n |
| Acy1          | n |
| Pcbp4         | y |
| Pcbp4         | y |
| Abhd14a       | y |
| Pcbp4         | y |
| Abhd14a       | y |
| Abhd14a       | y |
| Pcbp4         | n |
| Iqcf6         | n |
| Rbm15b        | y |
| Rbm15b        | y |
| Vprbp         | y |
| Rbm15b        | y |
| Vprbp         | y |
| Cish          | n |
| Hemk1         | n |
| 6430571L13Rik | n |
| Cyb561d2      | n |
| Cacna2d2      | n |
| Cyb561d2      | n |
| Cacna2d2      | n |
| Cyb561d2      | y |
| Sema3b        | y |
| Ifrd2         | n |
| Gnai2         | n |

|               |   |
|---------------|---|
| lfrd2         | n |
| Gnai2         | n |
| Gnai2         | n |
| lfrd2         | n |
| Slc38a3       | y |
| Slc38a3       | y |
| lfrd2         | n |
| Sema3f        | n |
| Sema3f        | n |
| Rbm5          | n |
| Mon1a         | n |
| Mon1a         | n |
| Rbm6          | n |
| Rbm6          | n |
| Mst1r         | n |
| Mst1r         | n |
| Apeh          | y |
| Mst1          | n |
| Bsn           | n |
| Bsn           | n |
| Bsn           | n |
| 4930447F24Rik | n |
| 4930447F24Rik | n |
| 4930447F24Rik | n |
| Bsn           | n |
| Dag1          | n |
| Amt           | y |
| Dalrd3        | n |
| P4htm         | n |
| P4htm         | y |
| Arih2         | y |
| Trex1         | n |
| Trex1         | n |
| Tma7          | n |
| Nbeal2        | y |
| Setd2         | y |
| Nbeal2        | y |
| Nbeal2        | y |

|          |   |
|----------|---|
| Setd2    | y |
| Nbeal2   | n |
| Ccdc12   | n |
| Ccdc12   | n |
| Nbeal2   | n |
| Ccdc12   | n |
| Nbeal2   | n |
| Pth1r    | n |
| Pth1r    | n |
| Ccdc12   | n |
| Prss50   | y |
| Prss50   | y |
| Prss50   | y |
| Prss50   | n |
| Als2cl   | n |
| Tmie     | n |
| Als2cl   | n |
| Tmie     | n |
| Tmie     | n |
| Tmie     | n |
| Als2cl   | y |
| Als2cl   | n |
| Tmie     | n |
| Als2cl   | n |
| Als2cl   | n |
| Lrrc2    | y |
| Ccrl2    | y |
| Ccrl2    | y |
| Ccrl2    | n |
| Mlh1     | y |
| Arpp21   | y |
| Arpp21   | y |
| Arpp21   | y |
| Trim71   | n |
| Glb1     | n |
| Dync1li1 | n |

|        |   |
|--------|---|
| Cmtm7  | n |
| Cmtm7  | n |
| Cmtm7  | n |
| Cmtm8  | n |
| Osbp10 | n |
| Osbp10 | n |
| Osbp10 | n |
| Stt3b  | n |
| Stt3b  | n |
| Stt3b  | n |
| Gad1   | n |
| Tgfbr2 | n |
| Gad1   | n |
| Tgfbr2 | n |
| Tgfbr2 | n |
| Rbms3  | n |
| Rbms3  | n |
| Cmc1   | n |
| Cmc1   | n |
| Eomes  | n |
| Cmc1   | n |
| Eomes  | n |
| Cmc1   | n |
| Eomes  | n |
| Eomes  | n |
| Cmc1   | n |
| Eomes  | n |
| Cmc1   | n |
| Cmc1   | y |
| Eomes  | n |
| Golga4 | n |
| Itga9  | n |
| Itga9  | n |
| Plcd1  | y |
| Dlec1  | n |
| Acvr2b | n |
| Scn5a  | n |
| Csrnp1 | n |
| Ttc21a | n |
| Csrnp1 | n |
| Ttc21a | n |

|               |   |
|---------------|---|
| Csrnp1        | n |
| Ttc21a        | y |
| Ttc21a        | n |
| Ttc21a        | y |
| Entpd3        | n |
| 1700020M21Rik | n |
| 5830454E08Rik | n |
| 1700020M21Rik | n |
| 1700020M21Rik | n |
| 1700020M21Rik | n |
| Trak1         | n |
| Trak1         | n |
| Ulk4          | n |
| Ulk4          | n |
| Trak1         | n |
| Ackr2         | n |
| Ano10         | n |
| Clec3b        | n |
| Cdcp1         | n |
| Clec3b        | y |
| Slc6a20b      | y |
| Ccr1l1        | n |
| Ppp1r3f       | y |
| Ppp1r3f       | y |
| Plp2          | y |
| Ccdc120       | n |
| Ccdc120       | n |
| Tfe3          | y |
| Tfe3          | y |
| Ccdc120       | y |
| Tfe3          | y |
| Ccdc120       | y |
| Tfe3          | y |
| Tfe3          | y |
| Ccdc120       | y |
| Pqbp1         | y |
| Eras          | n |
| Eras          | y |
| Slc38a5       | n |
| Slc38a5       | n |
| Porcn         | n |

|               |   |
|---------------|---|
| Porcn         | n |
| Gm5634        | n |
| Fthl17        | n |
| Lancl3        | y |
| Lancl3        | y |
| Lancl3        | n |
| Rpgr          | n |
| Bcor          | n |
| Bcor          | n |
| Bcor          | n |
| Gm4906        | n |
| Bcor          | n |
| Gm4906        | n |
| Bcor          | n |
| Gm4906        | n |
| Bcor          | n |
| Gm4906        | n |
| Bcor          | n |
| Bcor          | n |
| Gm4906        | n |
| Bcor          | n |
| Gm4906        | n |
| Bcor          | n |
| Bcor          | n |
| Gm4906        | n |
| Atp6ap2       | n |
| Atp6ap2       | n |
| Atp6ap2       | n |
| Bcor          | n |
| Atp6ap2       | n |
| Atp6ap2       | n |
| Atp6ap2       | n |
| 2900008C10Rik | n |
| 2900008C10Rik | n |
| Atp6ap2       | n |



|               |   |
|---------------|---|
| Atp6ap2       | n |
| 2900008C10Rik | n |
| 2900008C10Rik | n |
| Atp6ap2       | n |
| Atp6ap2       | n |
| 2900008C10Rik | n |
| Atp6ap2       | n |
| 2900008C10Rik | n |
| Atp6ap2       | n |
| 2900008C10Rik | n |
| 2900008C10Rik | n |
| Atp6ap2       | n |
| Atp6ap2       | n |
| Atp6ap2       | n |
| 2900008C10Rik | n |
| 2900008C10Rik | n |
| Atp6ap2       | n |
| Atp6ap2       | n |
| Gm14635       | n |
| Gm14635       | n |
| Atp6ap2       | n |
| Gm14635       | n |
| 1810030007Rik | y |
| 5730405015Rik | n |
| 2010308F09Rik | n |
| Ddx3x         | n |
| Ddx3x         | n |
| Nyx           | n |
| Cask          | n |
| Cask          | n |
| Cask          | n |
| Nyx           | n |
| Nyx           | n |
| Cask          | n |
| Nyx           | n |
| Cask          | n |
| Nyx           | n |
| Nyx           | n |
| Nyx           | n |
| Cask          | n |
| Cask          | n |



|               |   |
|---------------|---|
| Xlr4a         | y |
| Pnma3         | y |
| Pnma3         | y |
| Pnck          | n |
| Atp2b3        | n |
| Pnck          | n |
| Dusp9         | y |
| Ssr4          | y |
| Ssr4          | y |
| Ssr4          | y |
| Pdzd4         | y |
| Smim9         | n |
| Vbp1          | y |
| Dmd           | n |
| 4932429P05Rik | n |
| Zfx           | n |
| Maged1        | n |
| Zxdb          | n |
| Spin4         | n |
| Spin4         | n |
| Amer1         | y |
| Msn           | n |
| Ophn1         | y |
| Yipf6         | n |
| Efnb1         | n |
| Gm14812       | n |
| Gm14812       | n |
| Gm14812       | n |
| Efnb1         | n |
| Efnb1         | n |
| Efnb1         | n |
| Gm14812       | n |
| Gm14812       | n |
| Gm14812       | n |
| Efnb1         | n |
| Efnb1         | n |
| Gm14812       | n |
| Pja1          | n |
| Tmem28        | y |
| Tmem28        | y |
| Tex11         | n |



|               |   |
|---------------|---|
| Pak3          | y |
| Pak3          | y |
| Fgd1          | y |
| Wnk3          | n |
| Wnk3          | n |
| 3010001F23Rik | y |
| Gpr173        | y |
| 3010001F23Rik | y |
| 3010001F23Rik | y |
| 3010001F23Rik | y |
| Gpr173        | y |
| Mageh1        | n |
| Mbtps2        | n |
| Mbtps2        | n |
| Cnksr2        | n |
| Pdha1         | y |
| Sh3kbp1       | n |
| Rai2          | y |
| Nhs           | y |
| Nhs           | n |
| Rbbp7         | n |
| Bc1           | n |
| Bc1           | n |
| Rnf138rt1     | y |
| Rnf138rt1     | y |
| Bmx           | y |
| Bmx           | n |
| Gm1720        | y |
| Gm1720        | y |
| Tmsb4x        | n |
| Tlr8          | n |
| Mid1          | n |
| Mid1          | n |
| G530011O06Rik | n |
| G530011O06Rik | n |

|               |   |
|---------------|---|
| G530011O06Rik | n |
| G530011O06Rik | n |
| Zfy2          | n |
| Zfy2          | n |
| Zfy2          | n |
| Gm21708       | n |
| Gm20822       | n |
| Erdr1         | n |

---
