# Supplementary material
Source: PubMed Central journal article supplement (PMC5359771)
Supplement: NIHMS849092-supplement-Table_3.pdf [file NIHMS849092-supplement-Table_3.pdf]

**Extended Data Table 8.** Differentially expressed genes in LSK cells from *Dnmt3* identified by RNA-seq ( $p$  (adj)<0.05, average normalized read cc

| gene          | counts(wt) | counts(mut) | log2(FoldChange) | $p$ -value | adjusted $p$ -value |
|---------------|------------|-------------|------------------|------------|---------------------|
| Rapgef1l      | 84.8851294 | 247.277566  | 1.495404391      | 1.45E-15   | 2.50E-11            |
| Skida1        | 15.1096565 | 95.0525873  | 2.392144835      | 8.00E-14   | 5.69E-10            |
| Serpinh1      | 165.467983 | 507.336661  | 1.553711853      | 9.91E-14   | 5.69E-10            |
| Ggt1          | 65.8279204 | 253.047852  | 1.834779152      | 1.33E-13   | 5.74E-10            |
| Mmp14         | 589.105479 | 1147.13751  | 0.946689547      | 7.49E-13   | 2.15E-09            |
| Rps4y2        | 145.062143 | 365.016553  | 1.293175435      | 6.63E-13   | 2.15E-09            |
| Cldn4         | 19.4646594 | 125.692109  | 2.401394836      | 1.10E-12   | 2.72E-09            |
| Eps8l2        | 129.729789 | 324.081173  | 1.281685031      | 3.32E-12   | 7.02E-09            |
| Pcbp4         | 205.624234 | 650.222552  | 1.583853272      | 6.81E-12   | 1.17E-08            |
| Psma8         | 657.803082 | 1181.27121  | 0.833750493      | 4.41E-11   | 6.90E-08            |
| Hormad2       | 132.530679 | 387.303966  | 1.477703046      | 1.02E-10   | 1.35E-07            |
| Schip1        | 73.6278716 | 203.538323  | 1.401829505      | 2.52E-10   | 3.10E-07            |
| Angptl2       | 412.829721 | 750.14661   | 0.847578351      | 3.28E-10   | 3.77E-07            |
| Cdcp1         | 1431.64137 | 2238.91375  | 0.63888851       | 1.07E-09   | 1.15E-06            |
| Wfdc2         | 83.3350994 | 235.409177  | 1.422425919      | 2.17E-09   | 2.08E-06            |
| Tex14         | 58.3824951 | 215.409042  | 1.727453461      | 8.48E-09   | 7.68E-06            |
| Wfikkn2       | 91.1623909 | 193.374976  | 1.051567071      | 1.31E-08   | 1.12E-05            |
| Nxf7          | 26.6877763 | 84.373601   | 1.546773976      | 1.64E-08   | 1.34E-05            |
| Tjp1          | 1896.0446  | 798.80143   | -1.19802997      | 2.04E-08   | 1.60E-05            |
| Vcam1         | 611.179364 | 1246.83584  | 0.998229691      | 6.69E-08   | 4.64E-05            |
| Pyroxd2       | 83.0560732 | 204.716627  | 1.241358303      | 6.74E-08   | 4.64E-05            |
| Usp44         | 140.935194 | 303.391801  | 1.069699204      | 8.16E-08   | 5.41E-05            |
| Trim59        | 3488.10542 | 2313.77675  | -0.585602209     | 2.94E-07   | 0.00018756          |
| Npr2          | 623.628035 | 1014.4396   | 0.690071501      | 5.34E-07   | 0.00030678          |
| Zcchc18       | 246.869446 | 465.351487  | 0.889329363      | 5.34E-07   | 0.00030678          |
| 9630013D21Rik | 289.784845 | 139.83976   | -1.012160838     | 9.14E-07   | 0.00049186          |
| Fsd2          | 188.396273 | 381.050763  | 0.98030078       | 1.03E-06   | 0.00053541          |
| Prom2         | 44.2577079 | 120.373827  | 1.344461252      | 1.06E-06   | 0.00053629          |
| Zfp105        | 70.9260263 | 145.292138  | 0.997170541      | 1.10E-06   | 0.00054068          |
| Rap1gap       | 110.293442 | 236.365246  | 1.055665853      | 1.18E-06   | 0.00056308          |
| Apbb1         | 179.136385 | 326.967052  | 0.844196215      | 1.62E-06   | 0.00073398          |
| Dnaaf3        | 344.945568 | 642.809296  | 0.871886331      | 1.78E-06   | 0.00078602          |
| BC002163      | 29.0565984 | 150.035397  | 1.952779087      | 2.25E-06   | 0.00094359          |
| C2            | 40.2602478 | 108.094344  | 1.32145201       | 2.94E-06   | 0.00119113          |
| Cplx2         | 660.092803 | 972.565774  | 0.552298499      | 2.97E-06   | 0.00119113          |

|               |            |            |              |          |            |
|---------------|------------|------------|--------------|----------|------------|
| Sh3bp4        | 87.6454476 | 166.405847 | 0.895011198  | 3.22E-06 | 0.00126197 |
| Xlr4a         | 424.986717 | 721.850416 | 0.74772126   | 3.30E-06 | 0.00126389 |
| Pde1c         | 243.514388 | 492.755139 | 0.976584264  | 3.54E-06 | 0.00130007 |
| C430042M11Rik | 82.34829   | 186.01234  | 1.117613522  | 4.58E-06 | 0.00164484 |
| Adc           | 168.737716 | 336.094371 | 0.955227268  | 5.96E-06 | 0.00205792 |
| Ighv1-9       | 15.1082957 | 98.7335011 | 2.072467134  | 5.97E-06 | 0.00205792 |
| Arhgef17      | 252.255335 | 383.893509 | 0.596589347  | 7.51E-06 | 0.0025372  |
| Rps6ka6       | 297.442261 | 502.758611 | 0.738630797  | 7.89E-06 | 0.00261292 |
| Pilra         | 27.3613166 | 77.1888986 | 1.367216103  | 8.63E-06 | 0.00280411 |
| Arhgef16      | 27.5976338 | 118.092886 | 1.764185292  | 8.80E-06 | 0.00280539 |
| Tbc1d2        | 802.168625 | 1081.33779 | 0.427121946  | 1.14E-05 | 0.0035789  |
| Itgal         | 2729.25527 | 2063.63406 | -0.400530321 | 1.29E-05 | 0.00396864 |
| 5330417C22Rik | 32.2122059 | 79.2967228 | 1.206731207  | 1.39E-05 | 0.00411559 |
| Wdr86         | 225.750366 | 385.93429  | 0.754097663  | 1.38E-05 | 0.00411559 |
| Krt8          | 54.162337  | 162.911002 | 1.423283947  | 1.90E-05 | 0.00553848 |
| Il18rap       | 8050.61282 | 6068.72706 | -0.404596383 | 2.04E-05 | 0.00567117 |
| Erp27         | 122.141248 | 215.12704  | 0.790951201  | 1.99E-05 | 0.00567117 |
| Speg          | 115.46568  | 205.772893 | 0.806451649  | 2.26E-05 | 0.00616778 |
| Hsph1         | 3676.94372 | 2264.01788 | -0.683927932 | 2.38E-05 | 0.00629758 |
| Gm128         | 128.837345 | 262.603189 | 0.978687899  | 2.37E-05 | 0.00629758 |
| Hnrnpa3       | 4641.62103 | 3306.88734 | -0.483671503 | 2.45E-05 | 0.00640155 |
| G0s2          | 25.9956524 | 93.2858482 | 1.583492296  | 2.51E-05 | 0.00644148 |
| Ltb4r1        | 220.592426 | 377.414419 | 0.752891212  | 2.65E-05 | 0.00670841 |
| Scrn1         | 108.254725 | 190.303031 | 0.787562468  | 2.73E-05 | 0.00680855 |
| Zfp783        | 2425.20776 | 3548.54714 | 0.541396066  | 2.87E-05 | 0.00707313 |
| BC033916      | 42.1228698 | 100.529275 | 1.168717726  | 3.19E-05 | 0.00773926 |
| Unc5cl        | 132.677293 | 221.688766 | 0.721523419  | 3.28E-05 | 0.0078539  |
| Cmah          | 1448.31993 | 874.384584 | -0.709438049 | 3.53E-05 | 0.00821618 |
| Tgm2          | 4092.18968 | 5487.9927  | 0.419540994  | 3.92E-05 | 0.00899751 |
| Nrap          | 186.253455 | 313.119463 | 0.728459541  | 4.00E-05 | 0.00907406 |
| Gpr128        | 3117.15302 | 2174.23089 | -0.512766388 | 4.07E-05 | 0.00909561 |
| Hmga2         | 484.74198  | 267.521305 | -0.827538405 | 4.27E-05 | 0.00943169 |
| App           | 1869.90986 | 2488.31832 | 0.408501605  | 4.34E-05 | 0.00945667 |
| Nrp1          | 807.587229 | 466.455657 | -0.767456486 | 4.49E-05 | 0.00966139 |
| Lynx1         | 160.996041 | 275.284294 | 0.750982676  | 4.57E-05 | 0.00972415 |
| Dnah1         | 357.373031 | 589.621129 | 0.703649418  | 4.65E-05 | 0.00975928 |
| Neurl1a       | 31.9072982 | 86.3140914 | 1.295980301  | 5.57E-05 | 0.01142707 |
| Dmc1          | 136.56657  | 248.860369 | 0.835235264  | 6.79E-05 | 0.01359117 |
| Serping1      | 19.4859649 | 75.4295787 | 1.620518592  | 7.00E-05 | 0.01380353 |
| Rhoj          | 273.334722 | 475.565372 | 0.773037076  | 7.05E-05 | 0.01380353 |
| Oas3          | 1821.18109 | 1348.92624 | -0.429104072 | 9.00E-05 | 0.01721803 |

|               |            |            |              |            |            |
|---------------|------------|------------|--------------|------------|------------|
| Igdcc4        | 186.603504 | 330.610158 | 0.79452611   | 9.29E-05   | 0.01758917 |
| Pde2a         | 1854.28638 | 3147.9093  | 0.73971496   | 9.76E-05   | 0.01827882 |
| Myo5c         | 1011.11287 | 1473.49103 | 0.534115507  | 0.00011039 | 0.02022412 |
| Noxa1         | 42.0673158 | 86.0053634 | 0.971801382  | 0.0001102  | 0.02022412 |
| Alpk3         | 730.113147 | 1058.93348 | 0.527473233  | 0.00011366 | 0.02060419 |
| Nefh          | 1554.61584 | 1022.5886  | -0.592278779 | 0.00011683 | 0.0207433  |
| Iglc2         | 49.0583943 | 130.944572 | 1.269941601  | 0.0001164  | 0.0207433  |
| Ifi27         | 4669.80875 | 3600.31552 | -0.372328857 | 0.00012591 | 0.02212734 |
| Mmp15         | 140.138674 | 229.404386 | 0.689516195  | 0.00012799 | 0.02226492 |
| Myo7a         | 1454.55186 | 2025.90938 | 0.471718897  | 0.00015211 | 0.02619663 |
| Vill          | 1853.59675 | 2744.03457 | 0.55570823   | 0.00015367 | 0.02620255 |
| Mx1           | 363.729487 | 192.478951 | -0.875695806 | 0.00015843 | 0.02675045 |
| Nav1          | 1967.30251 | 1478.42674 | -0.408057372 | 0.00016963 | 0.02836203 |
| Mogat2        | 39.9609809 | 113.193499 | 1.321702479  | 0.0001731  | 0.02866493 |
| Gm1966        | 21404.3014 | 14671.2514 | -0.535377699 | 0.00019475 | 0.03134536 |
| Dos           | 171.429247 | 288.855665 | 0.726997074  | 0.00020142 | 0.03211982 |
| Acp5          | 136.08138  | 218.768126 | 0.664520375  | 0.00020359 | 0.03216778 |
| Map10         | 344.84624  | 513.884747 | 0.564579286  | 0.000206   | 0.03225156 |
| A430105119Rik | 366.931022 | 509.309101 | 0.466697453  | 0.0002128  | 0.03301604 |
| Chst13        | 66.9458814 | 134.31617  | 0.942571906  | 0.00024234 | 0.03726441 |
| Oas2          | 623.949589 | 318.387257 | -0.916922294 | 0.00024889 | 0.03793254 |
| Naa15         | 8579.43098 | 6264.0924  | -0.448037754 | 0.0002534  | 0.03828142 |
| Ighv1-80      | 28.3549426 | 166.601232 | 1.801912408  | 0.00026068 | 0.03903904 |
| Clstn3        | 2654.88002 | 3459.42137 | 0.378336562  | 0.00028632 | 0.04214561 |
| Tfpi          | 2836.51967 | 3574.24188 | 0.331162464  | 0.00030395 | 0.04409969 |
| Cyp2u1        | 46.5220416 | 99.3687351 | 1.018992292  | 0.00030472 | 0.04409969 |
| Alas1         | 4231.76942 | 5404.53802 | 0.350007871  | 0.00030936 | 0.04439823 |
| Pvrl4         | 495.433883 | 747.443153 | 0.58008999   | 0.00031228 | 0.04444679 |
| Dhx9          | 12860.377  | 8974.50683 | -0.510212651 | 0.00031961 | 0.04511745 |
| Enc1          | 687.925014 | 459.887472 | -0.568325856 | 0.00032955 | 0.04577071 |

---

*a(mut)* mice compared to wild-type controls,  
(n = 50)
